# Supplementary material
Source: bioRxiv or medRxiv preprint supplement (https://www.biorxiv.org/content/biorxiv/early/2020/01/23/802959.1/DC7/embed/media-7.pdf)

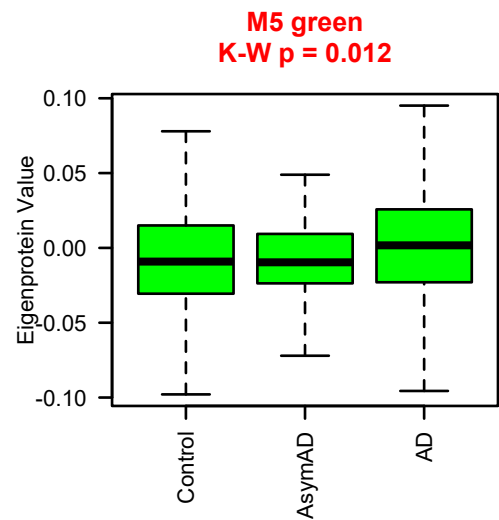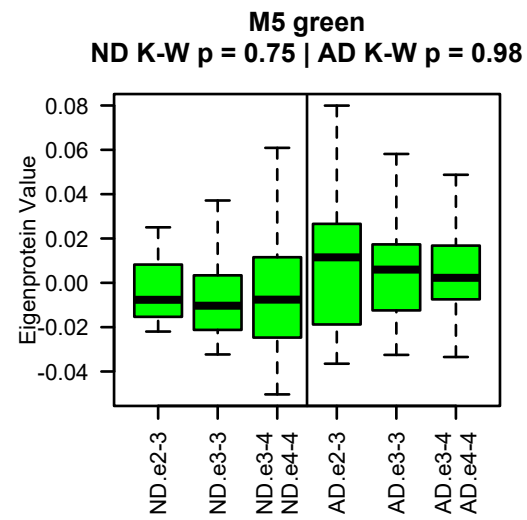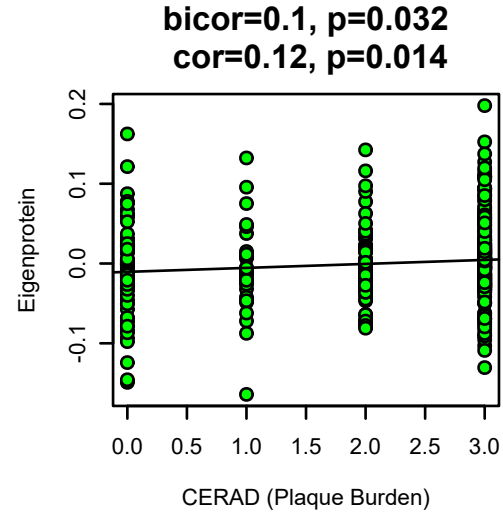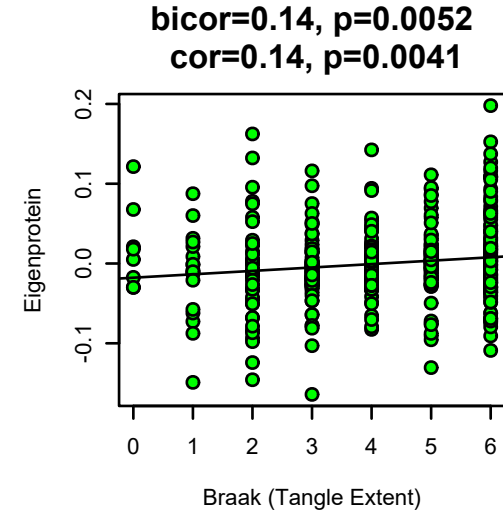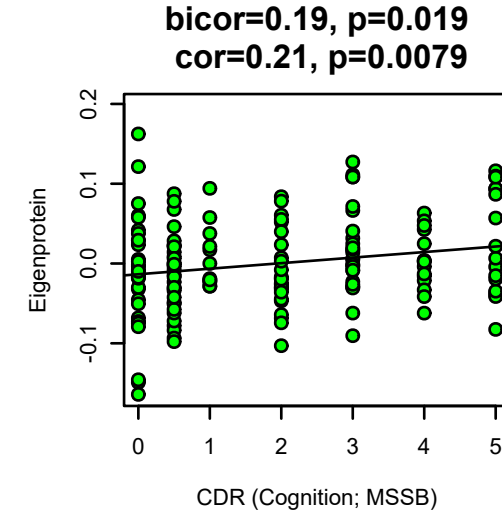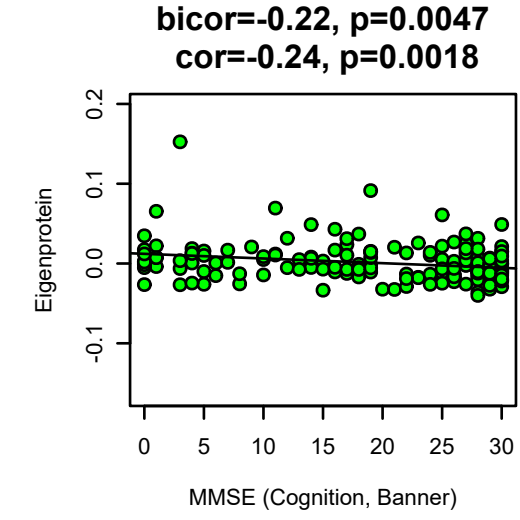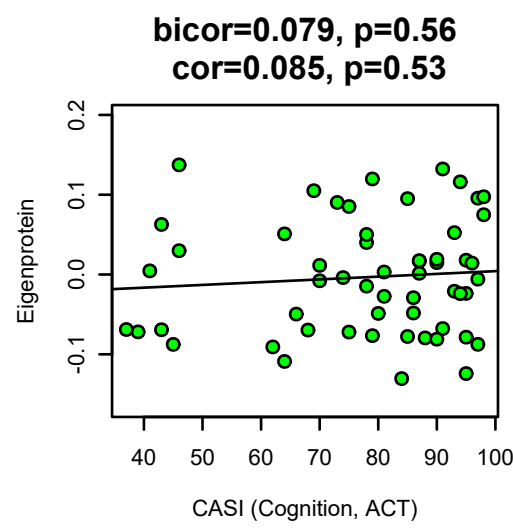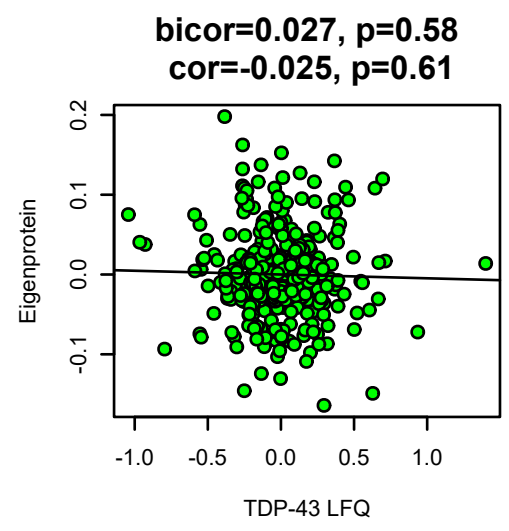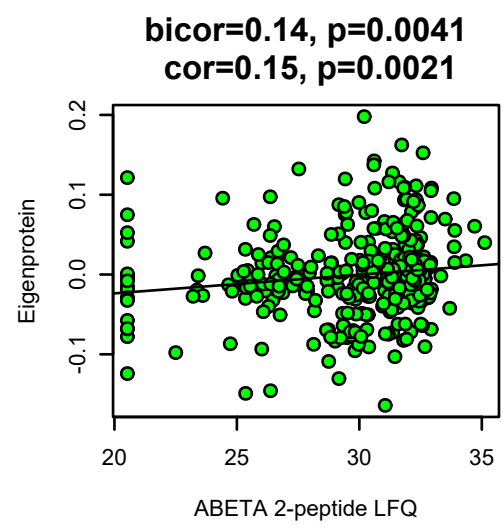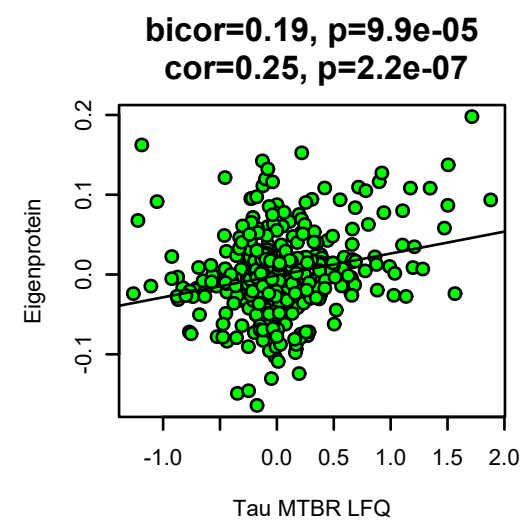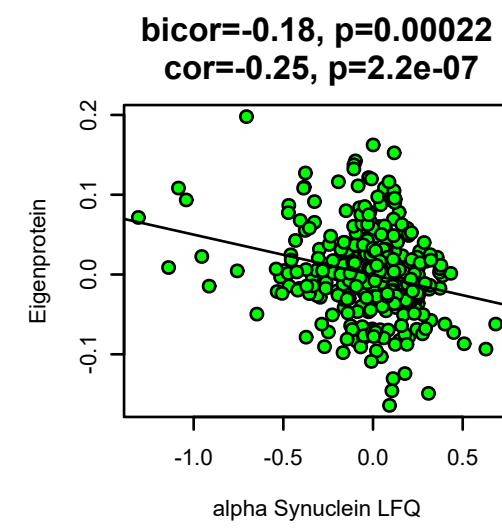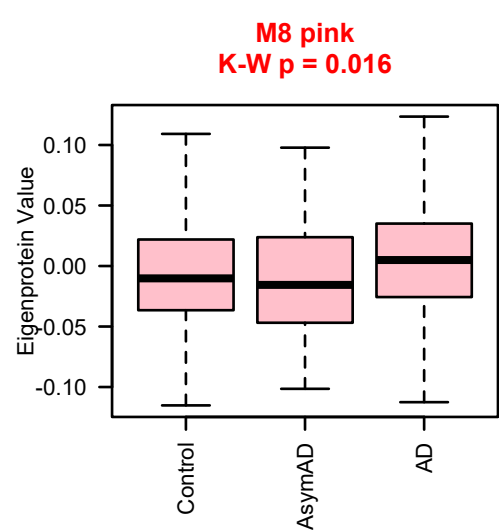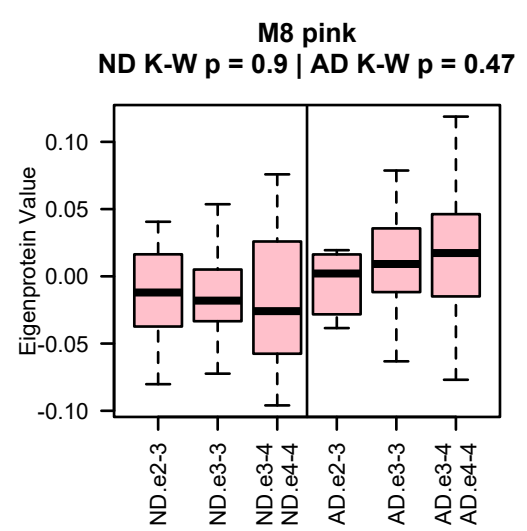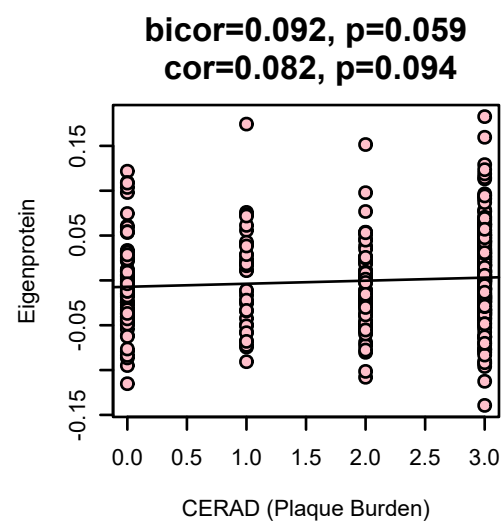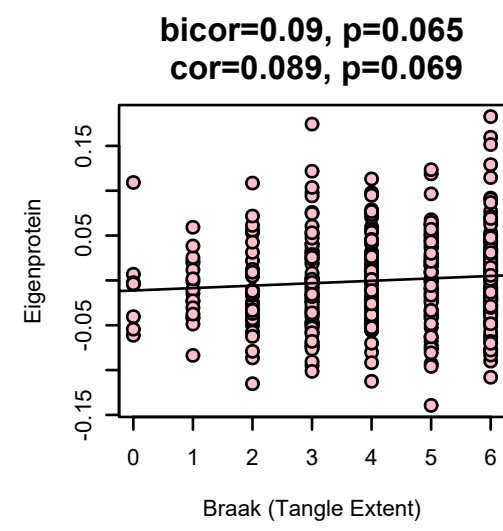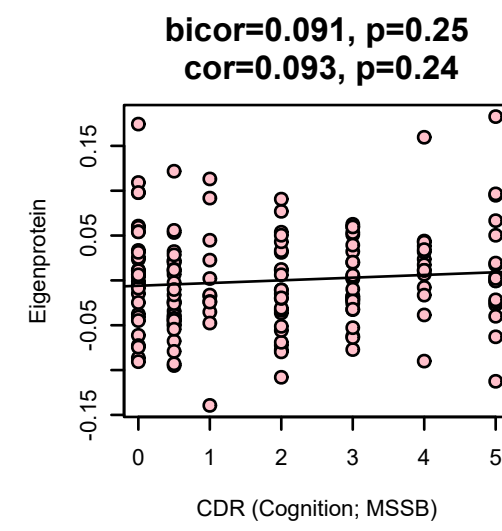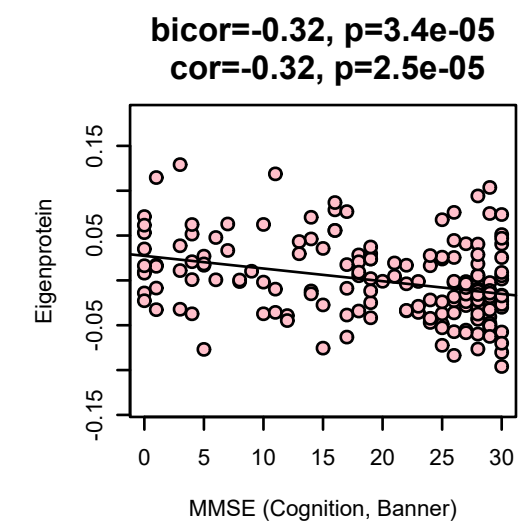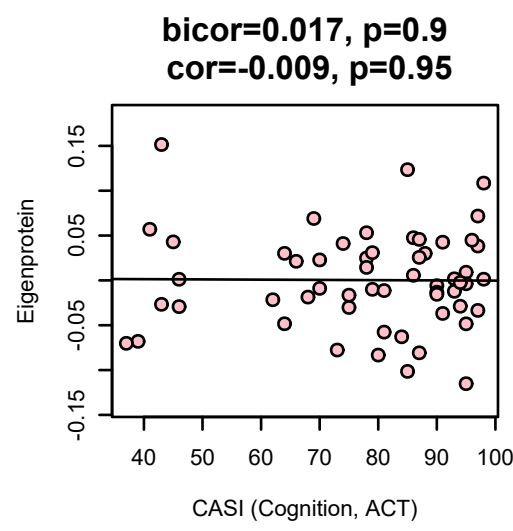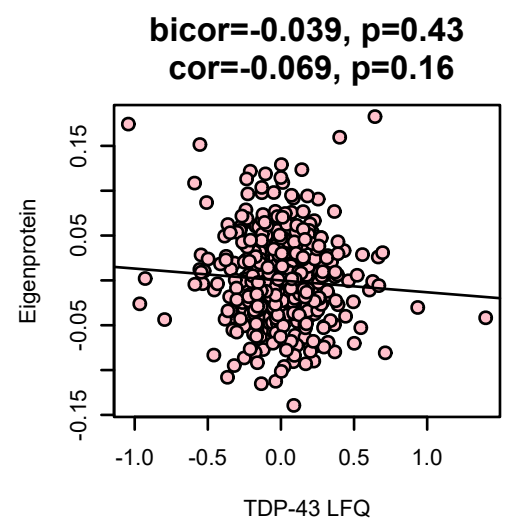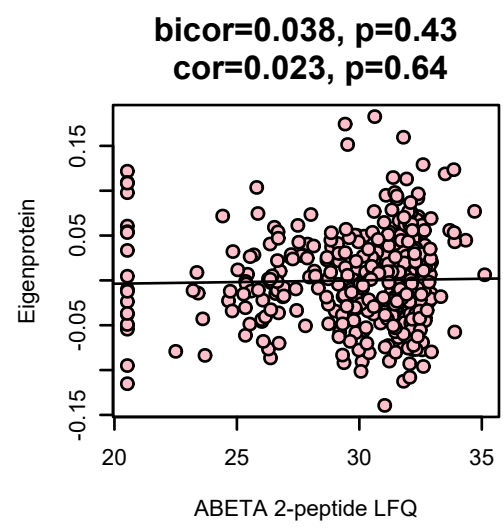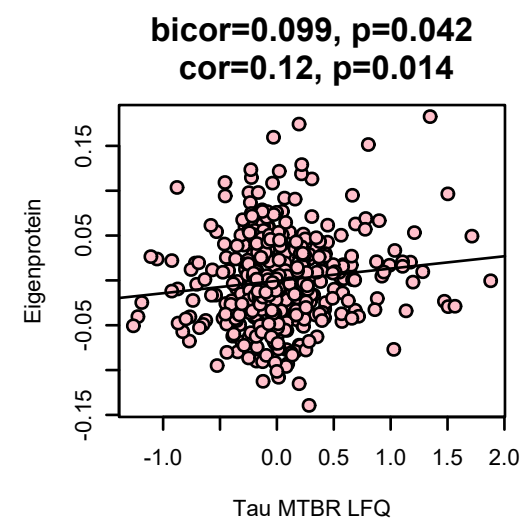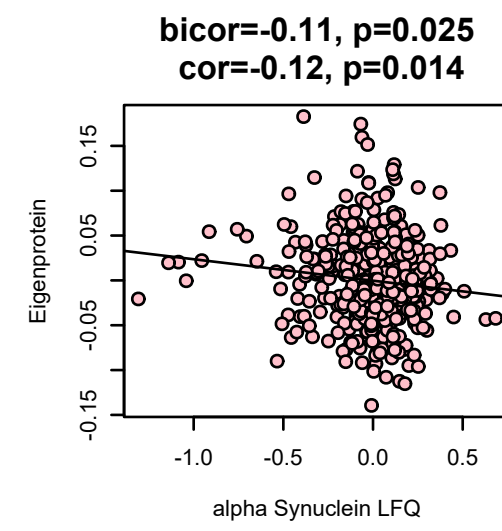

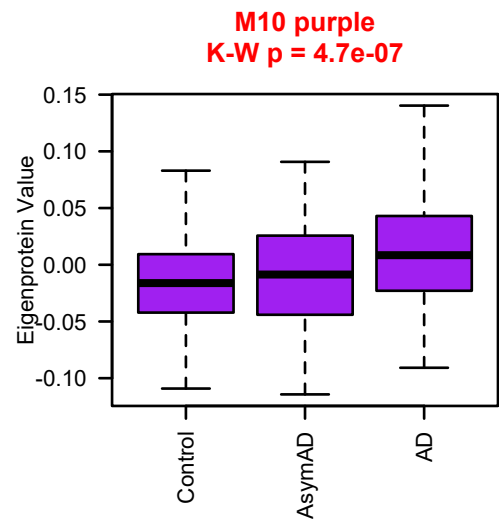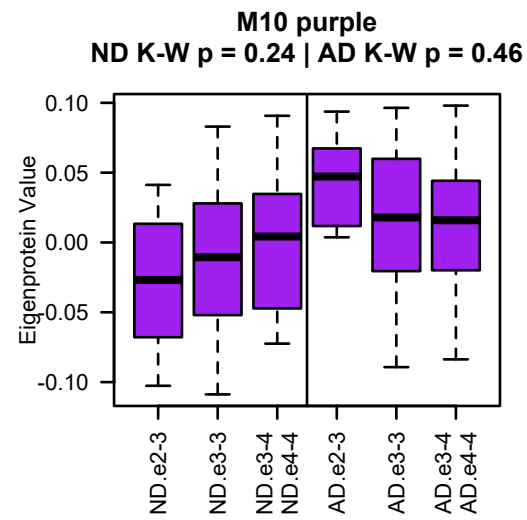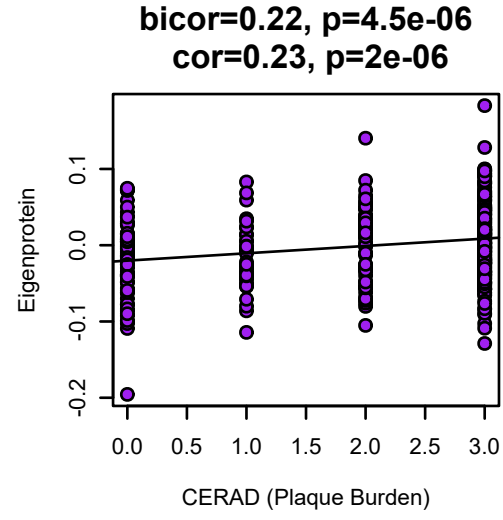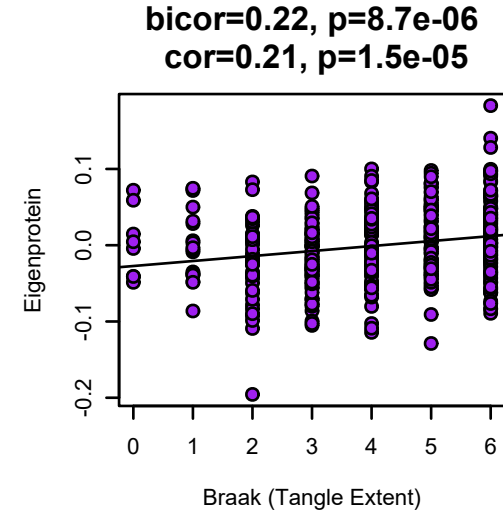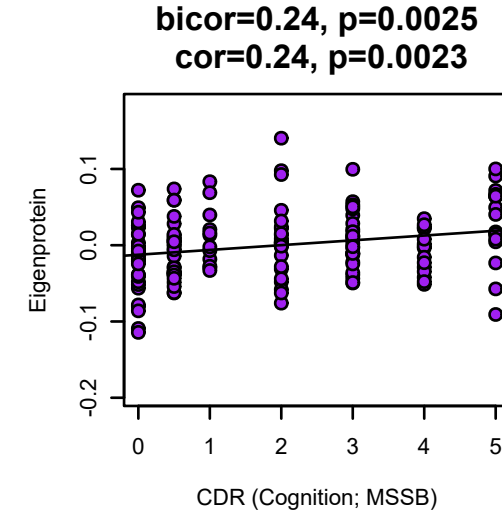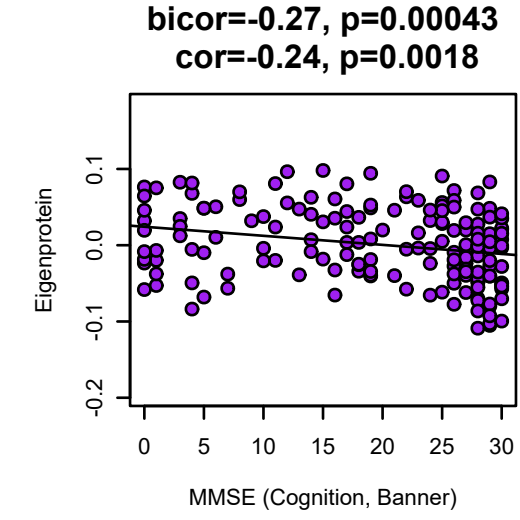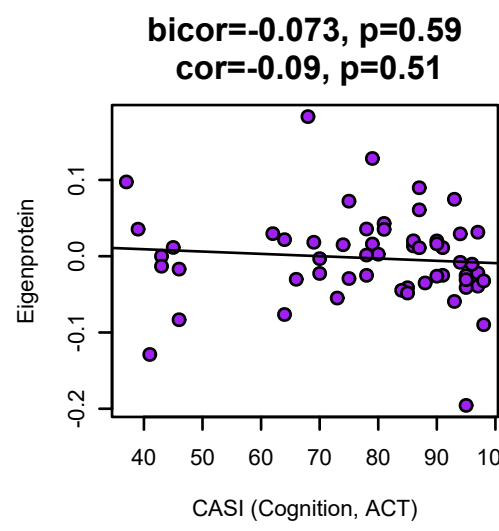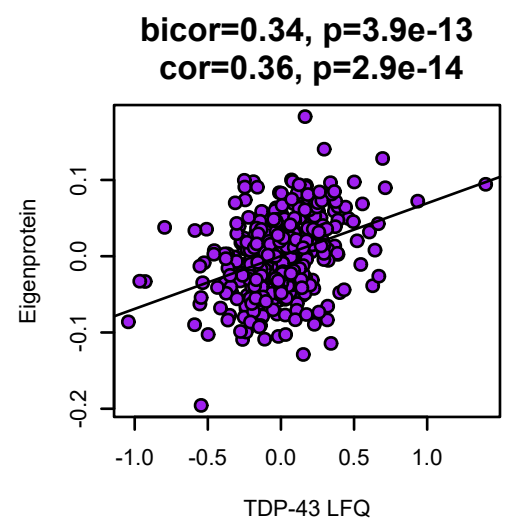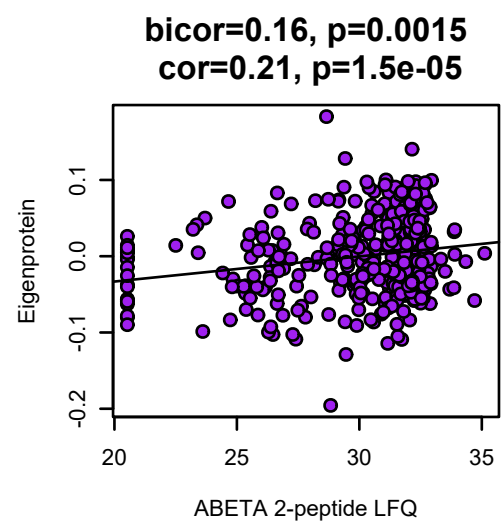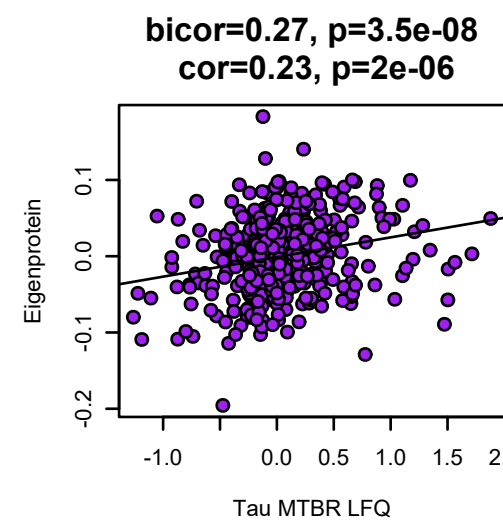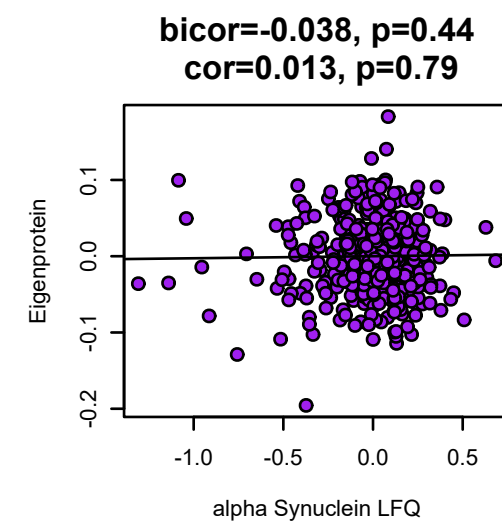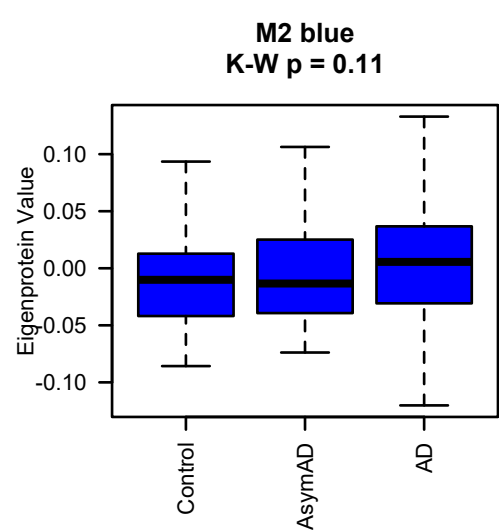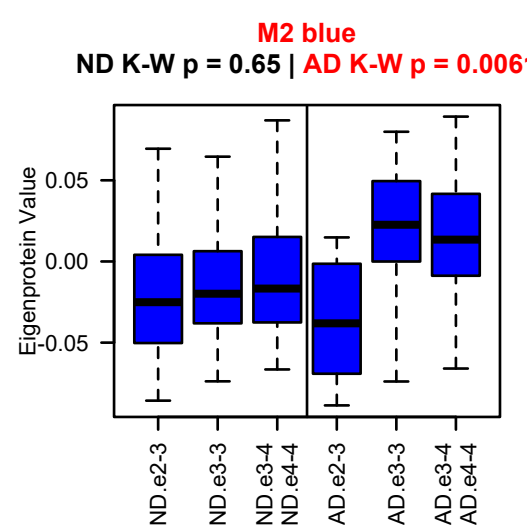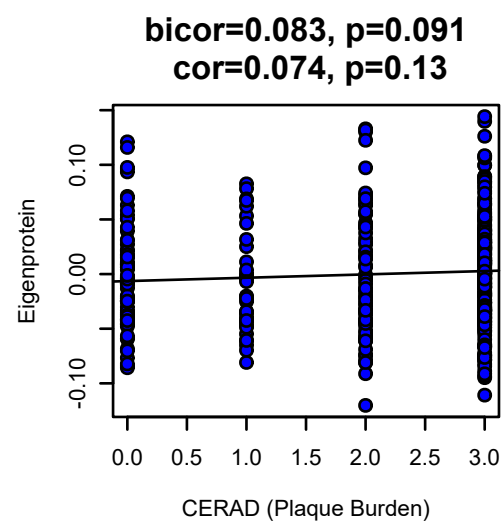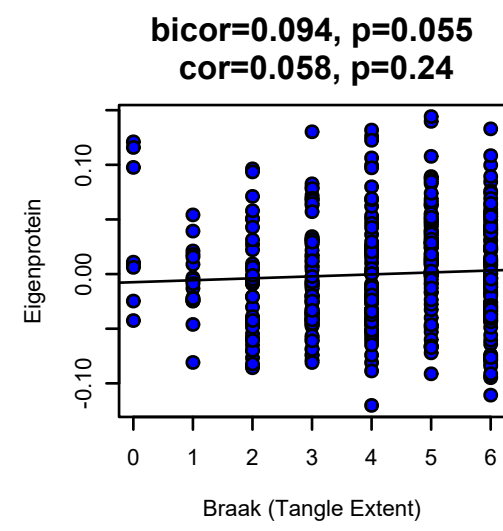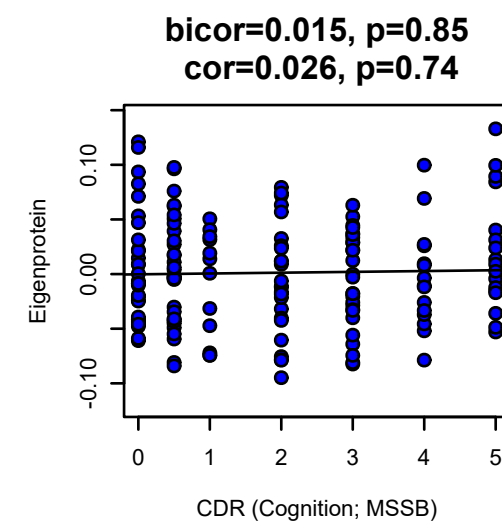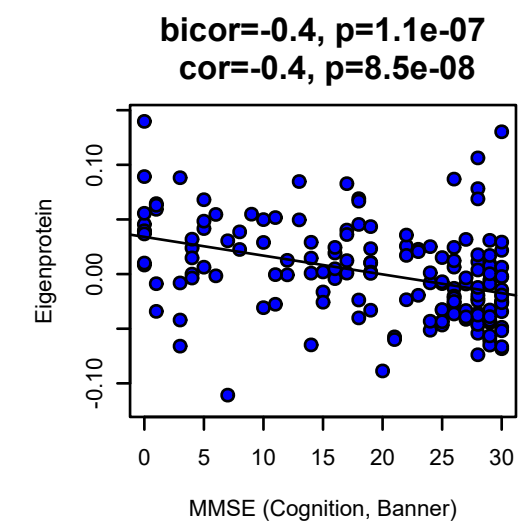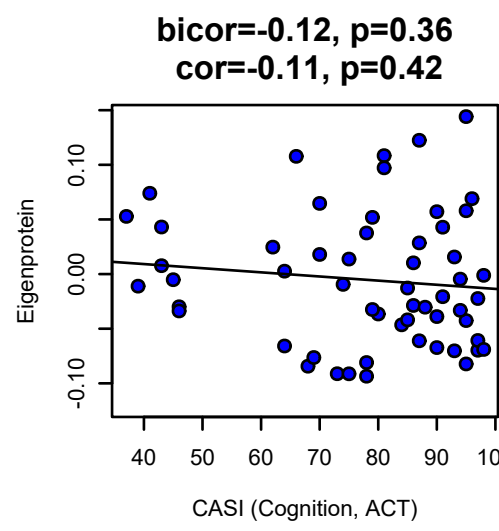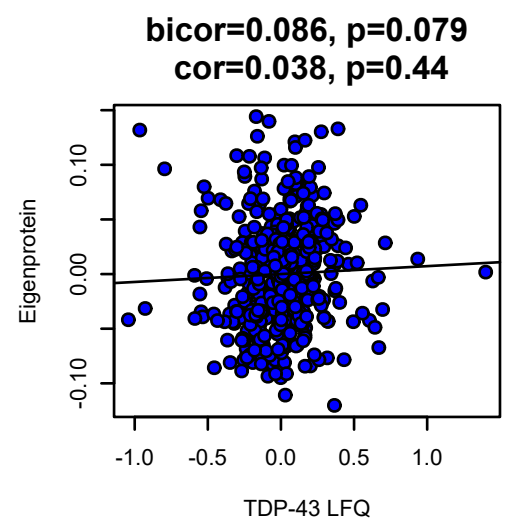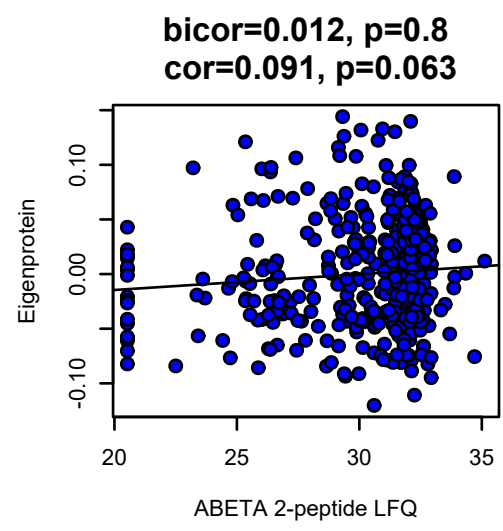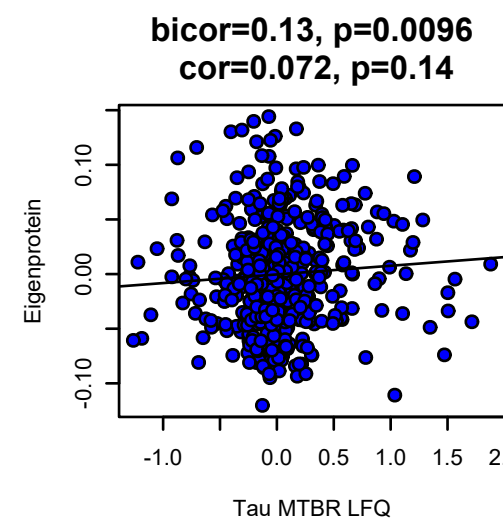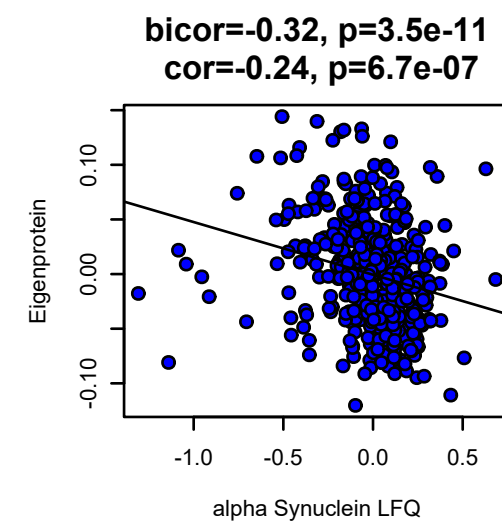

**M4 yellow**  
K-W  $p = 4.6e-28$

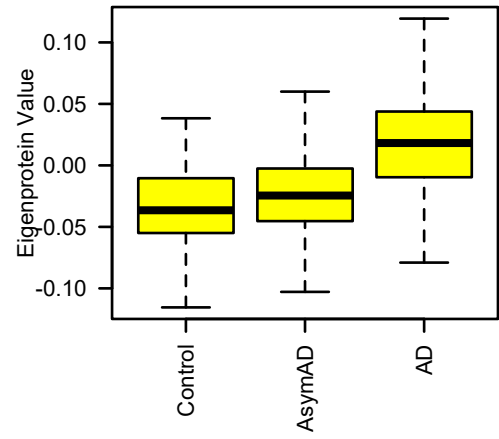

**M4 yellow**  
ND K-W  $p = 0.84$  | AD K-W  $p = 0.32$

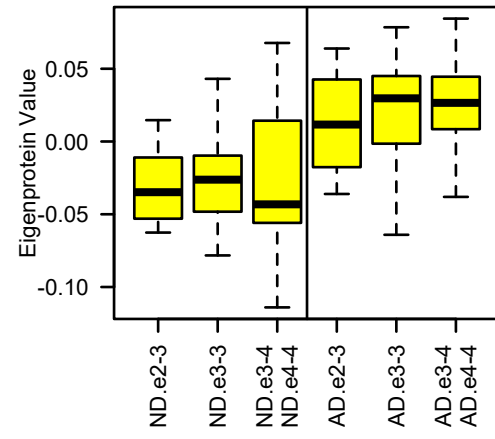

**bicor=0.46,  $p=1.3e-23$**   
**cor=0.44,  $p=2.9e-21$**

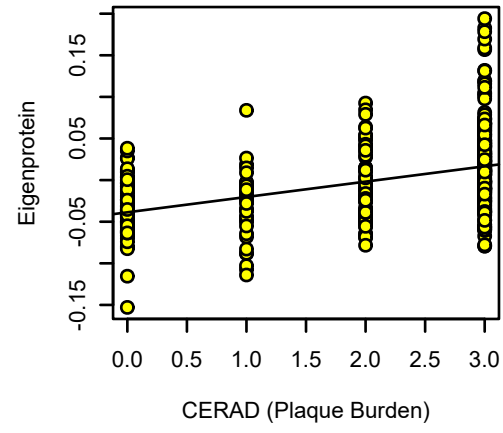

**bicor=0.49,  $p=4.7e-27$**   
**cor=0.46,  $p=2.5e-23$**

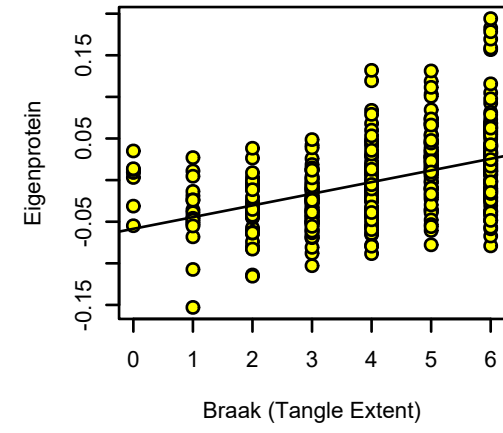

**bicor=0.52,  $p=2.6e-12$**   
**cor=0.53,  $p=6.8e-13$**

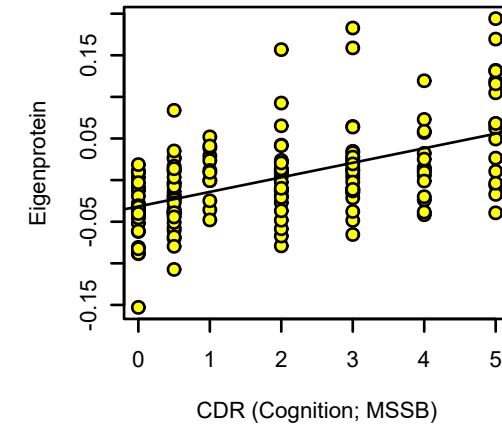

**bicor=-0.67,  $p=8.5e-23$**   
**cor=-0.67,  $p=4.1e-23$**

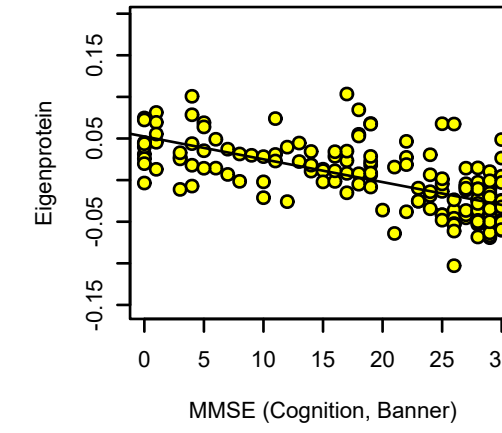

**bicor=-0.48,  $p=0.00021$**   
**cor=-0.47,  $p=0.00026$**

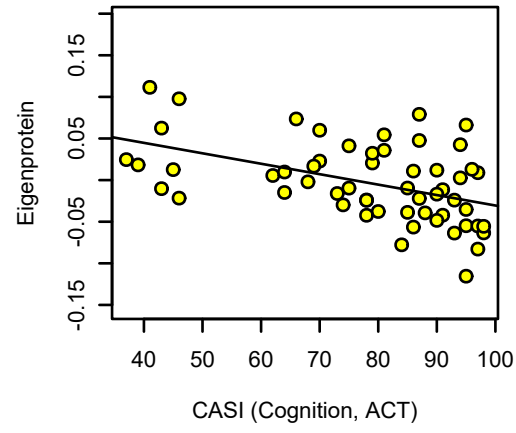

**bicor=0.17,  $p=0.00047$**   
**cor=0.13,  $p=0.0077$**

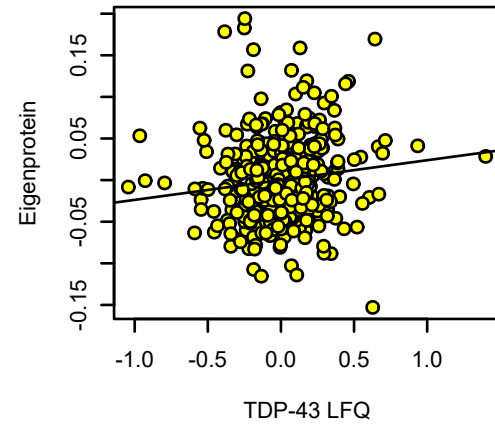

**bicor=0.29,  $p=2.3e-09$**   
**cor=0.37,  $p=4.9e-15$**

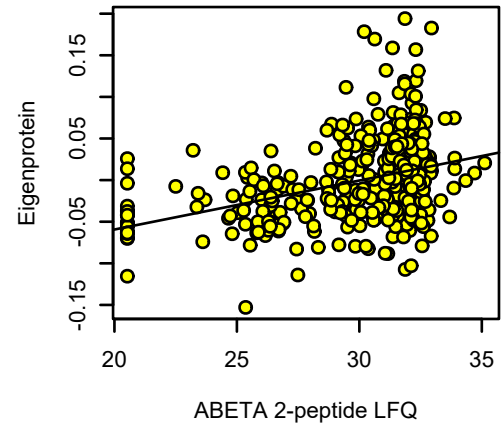

**bicor=0.51,  $p=3.6e-29$**   
**cor=0.57,  $p=1.8e-37$**

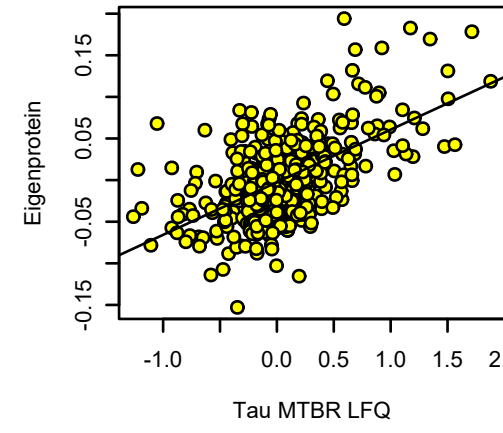

**bicor=-0.37,  $p=7.3e-15$**   
**cor=-0.35,  $p=1.6e-13$**

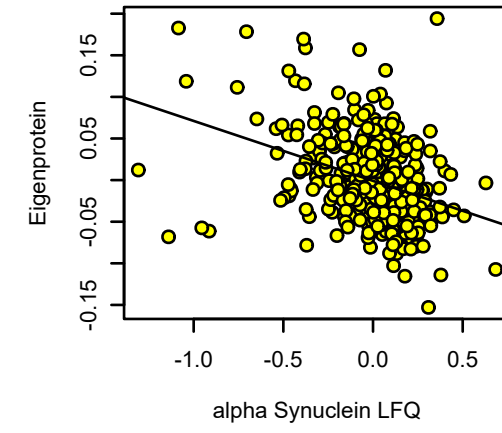

**M11 greenyellow**  
K-W  $p = 0.0032$

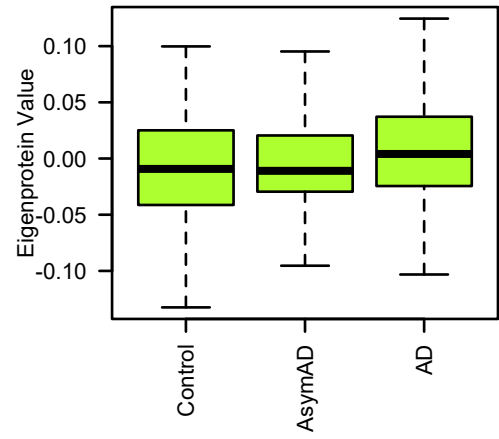

**M11 greenyellow**  
ND K-W  $p = 0.46$  | AD K-W  $p = 0.13$

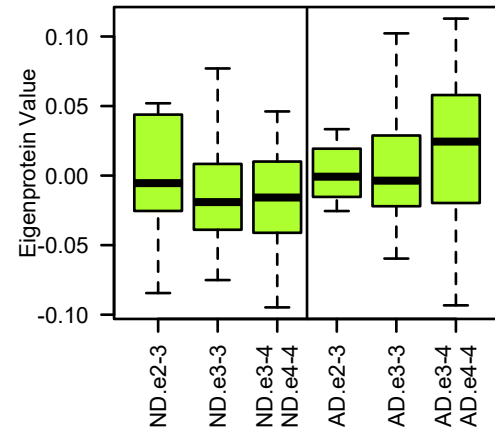

**bicor=0.13,  $p=0.0064$**   
**cor=0.13,  $p=0.0077$**

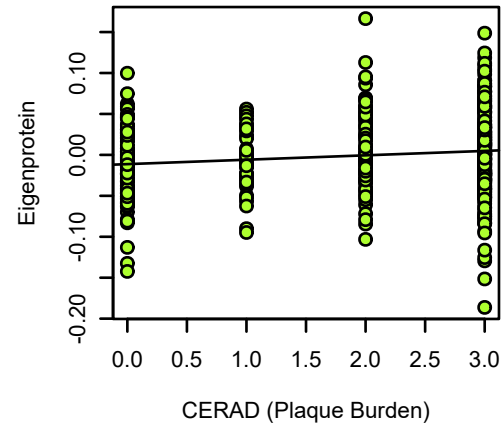

**bicor=0.11,  $p=0.02$**   
**cor=0.1,  $p=0.041$**

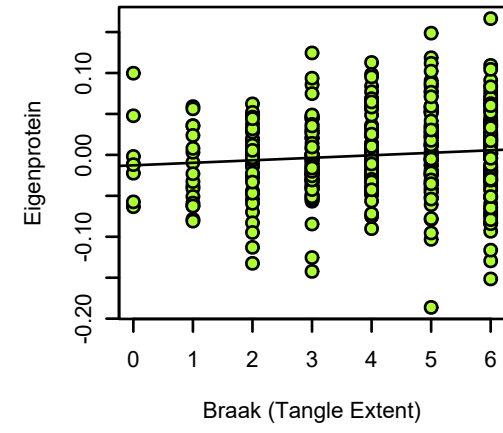

**bicor=0.11,  $p=0.17$**   
**cor=0.099,  $p=0.21$**

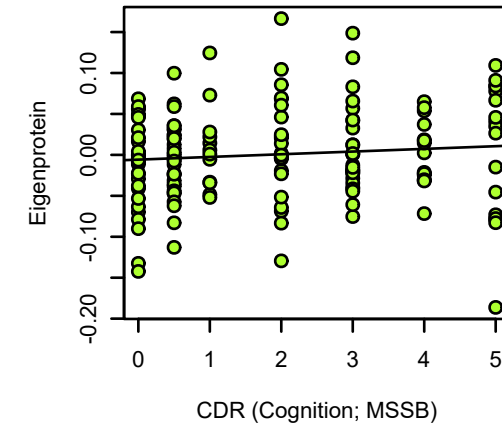

**bicor=-0.33,  $p=1.1e-05$**   
**cor=-0.3,  $p=8.2e-05$**

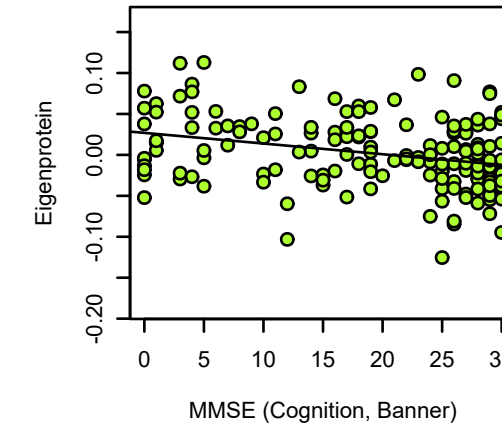

**bicor=-0.031,  $p=0.82$**   
**cor=-0.046,  $p=0.74$**

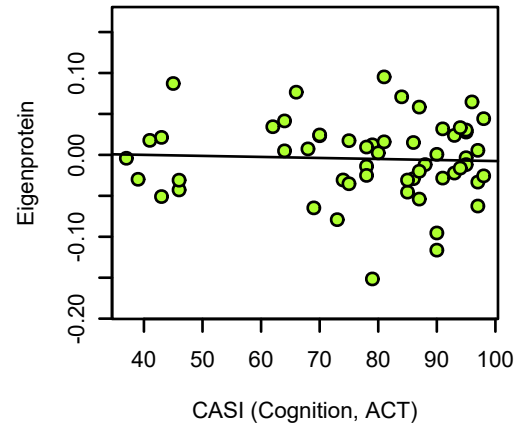

**bicor=-0.082,  $p=0.096$**   
**cor=-0.1,  $p=0.041$**

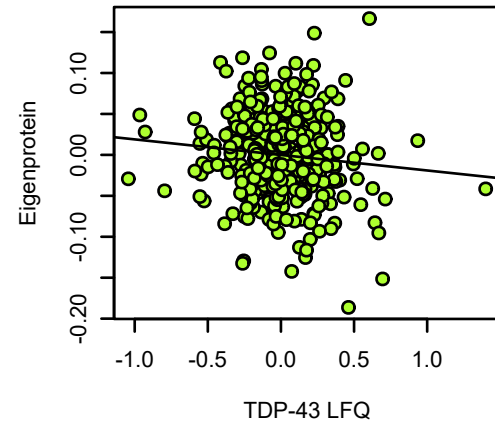

**bicor=0.034,  $p=0.49$**   
**cor=0.09,  $p=0.066$**

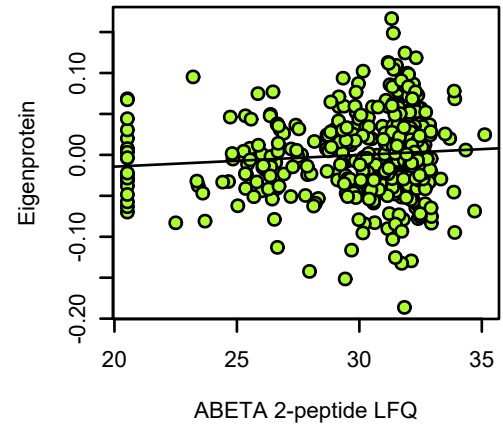

**bicor=0.063,  $p=0.2$**   
**cor=-0.0038,  $p=0.94$**

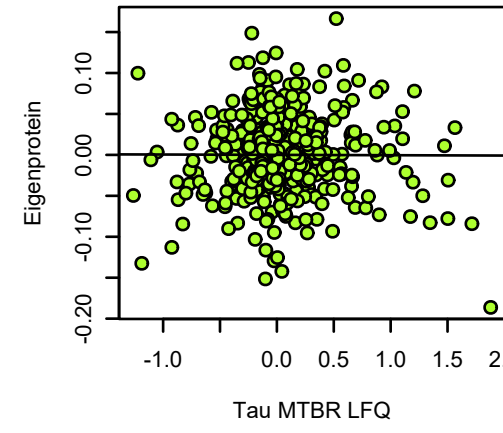

**bicor=-0.013,  $p=0.8$**   
**cor=0.06,  $p=0.22$**

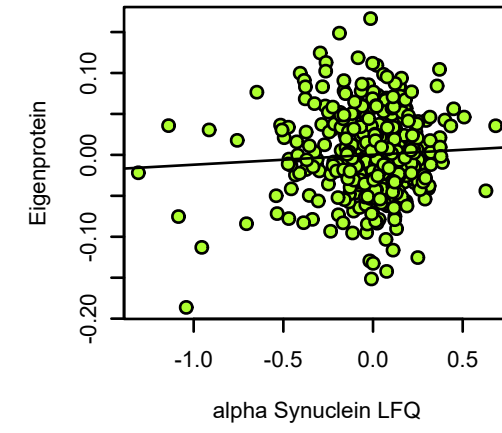



**M13 salmon**  
**K-W p = 0.012**

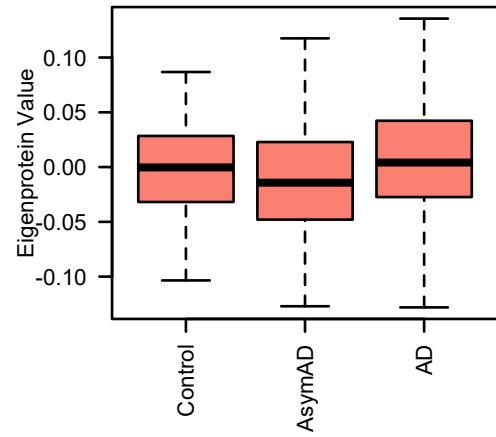

**M13 salmon**  
ND K-W p = 0.56 | AD K-W p = 0.24

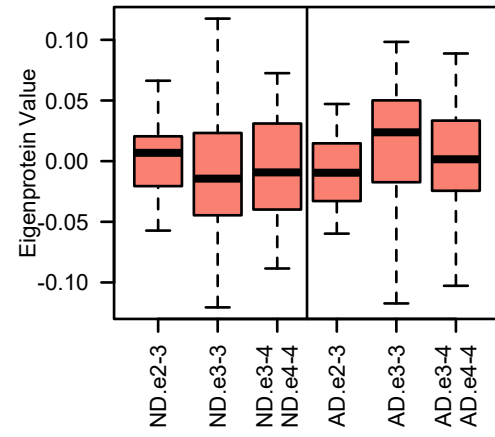

**bicor=0.041, p=0.4**  
**cor=0.041, p=0.4**

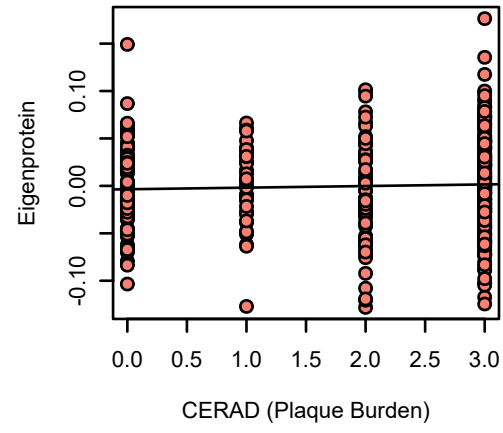

**bicor=0.05, p=0.3**  
**cor=0.035, p=0.47**

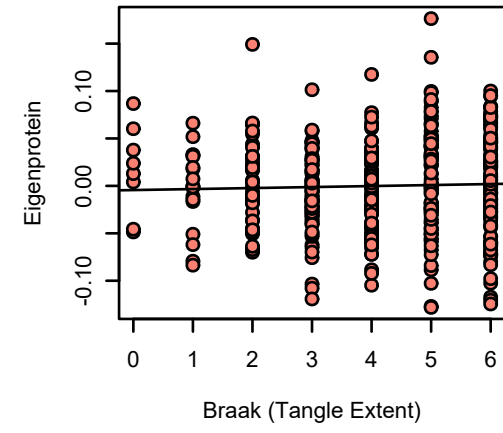

**bicor=0.13, p=0.099**  
**cor=0.13, p=0.1**

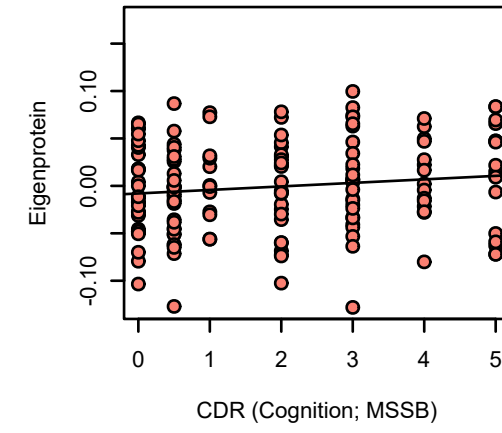

**bicor=-0.14, p=0.08**  
**cor=-0.14, p=0.071**

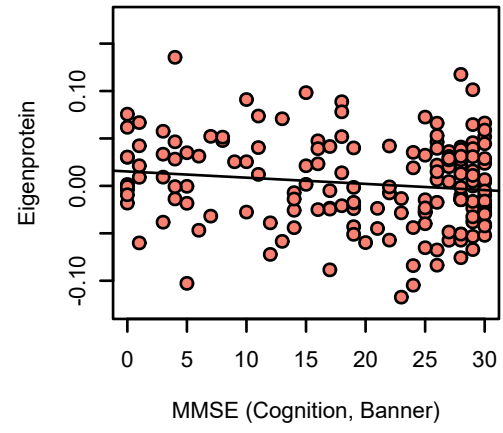

**bicor=-0.015, p=0.91**  
**cor=-0.074, p=0.59**

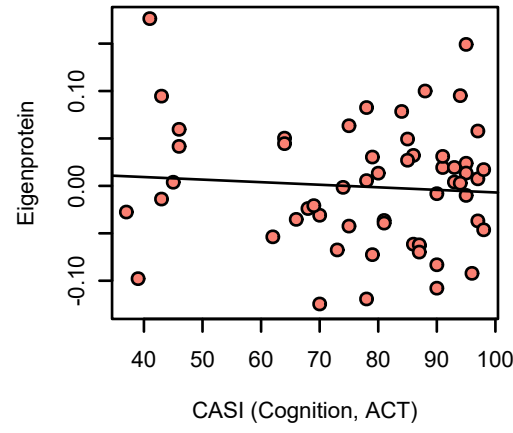

**bicor=-0.056, p=0.25**  
**cor=-0.064, p=0.19**

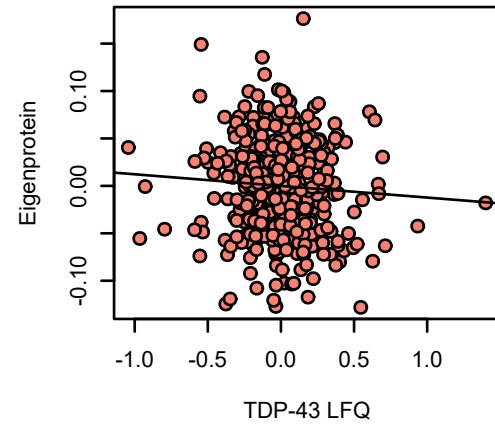

**bicor=0.0092, p=0.85**  
**cor=0.027, p=0.58**

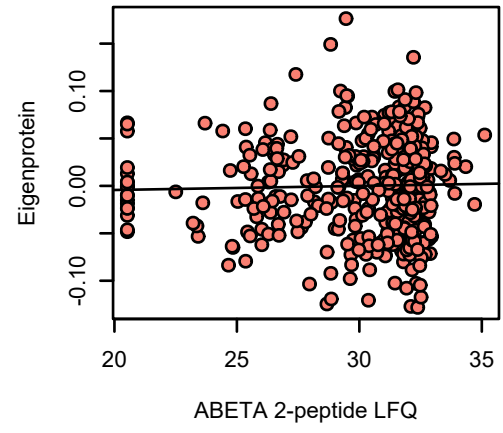

**bicor=0.049, p=0.31**  
**cor=0.071, p=0.15**

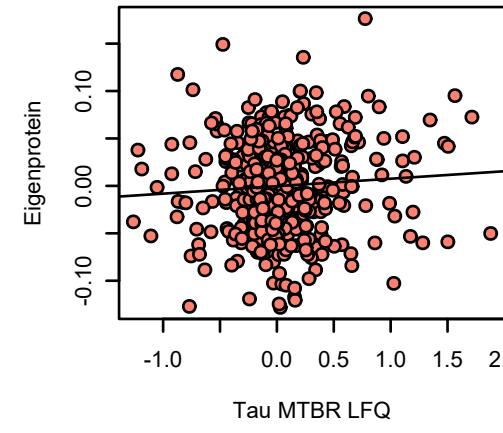

**bicor=-0.15, p=0.0021**  
**cor=-0.14, p=0.0041**

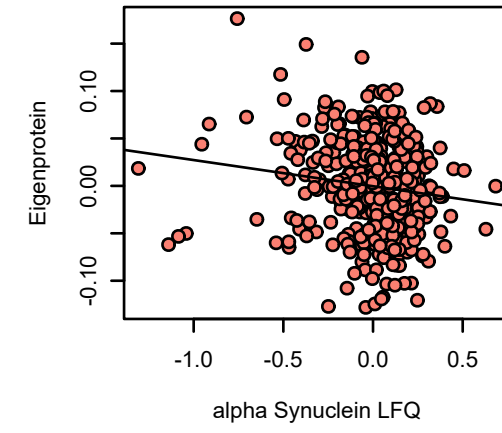

**M3 brown**  
**K-W p = 4.4e-12**

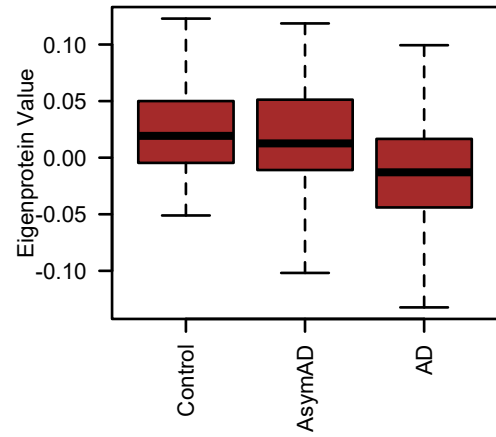

**M3 brown**  
ND K-W p = 0.44 | AD K-W p = 0.58

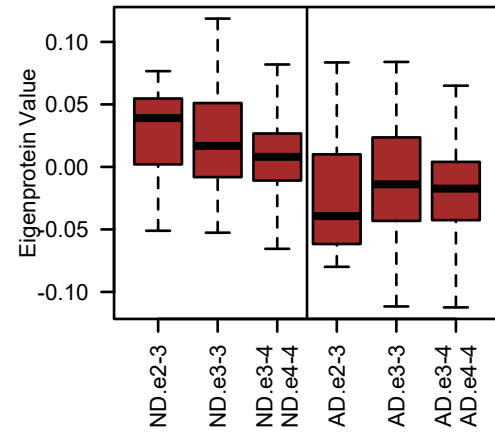

**bicor=-0.3, p=5.4e-10**  
**cor=-0.28, p=5.5e-09**

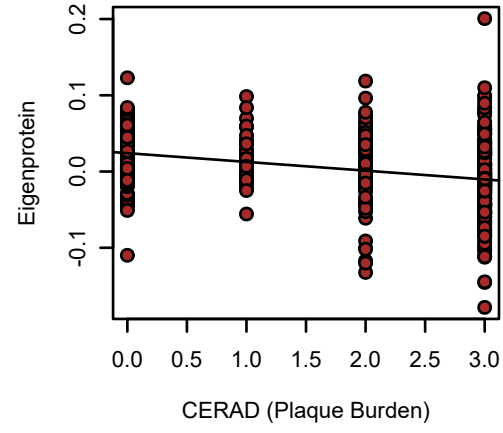

**bicor=-0.33, p=6.5e-12**  
**cor=-0.31, p=8.8e-11**

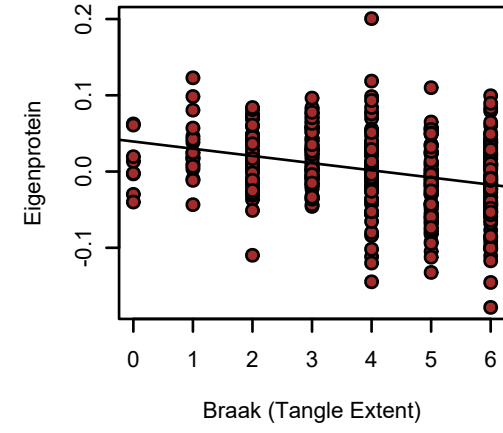

**bicor=-0.44, p=5.1e-09**  
**cor=-0.47, p=4.1e-10**

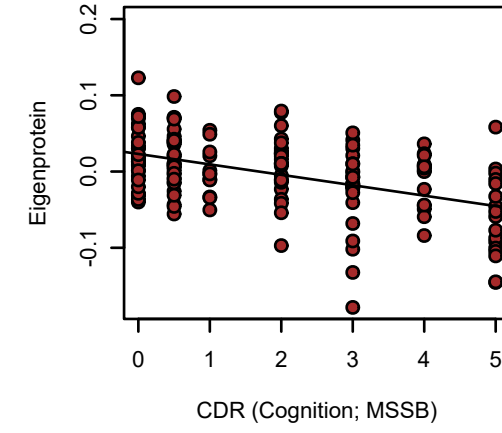

**bicor=0.47, p=1.8e-10**  
**cor=0.47, p=1.5e-10**

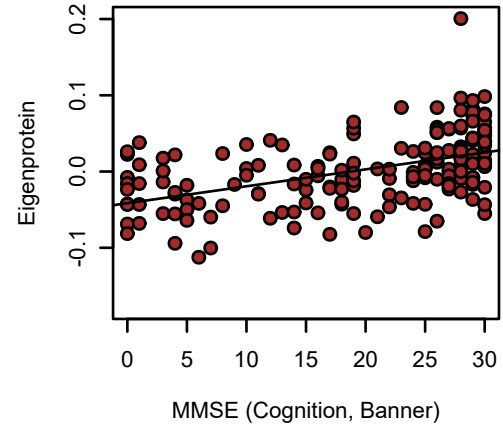

**bicor=0.24, p=0.069**  
**cor=0.24, p=0.075**

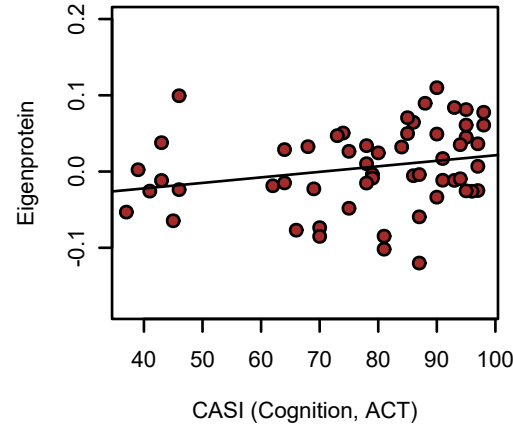

**bicor=-0.15, p=0.0018**  
**cor=-0.11, p=0.024**

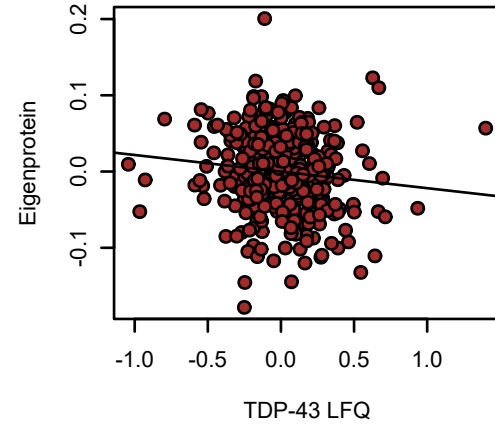

**bicor=-0.22, p=7.9e-06**  
**cor=-0.24, p=6.7e-07**

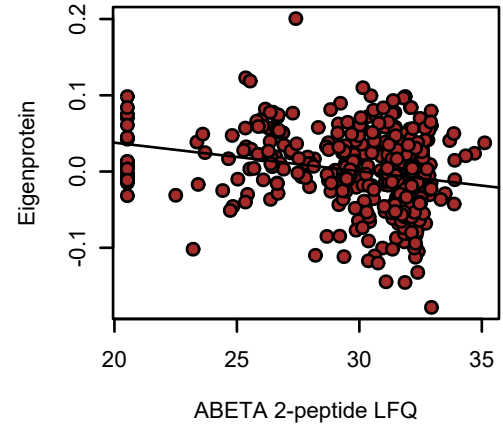

**bicor=-0.33, p=4e-12**  
**cor=-0.37, p=4.9e-15**

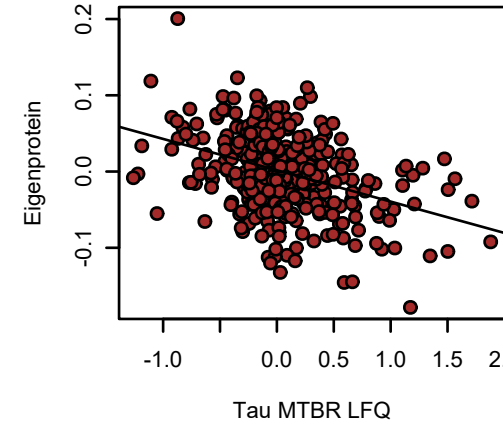

**bicor=0.12, p=0.011**  
**cor=0.13, p=0.0077**

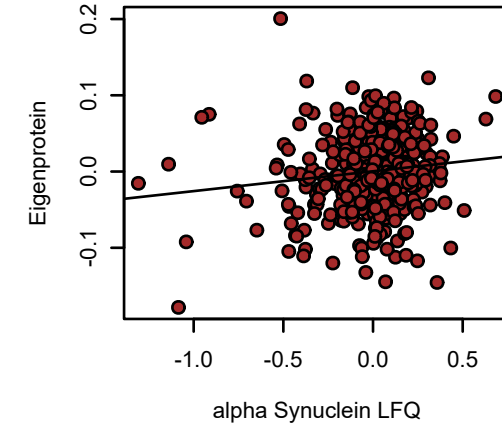



**M6 red**  
**K-W  $p = 2.2e-05$**

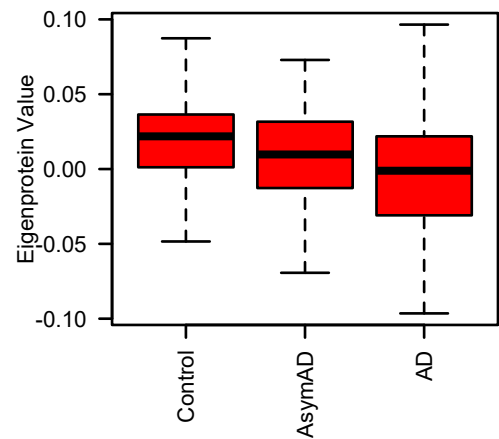

**M6 red**  
**ND K-W  $p = 0.48$  | AD K-W  $p = 0.57$**

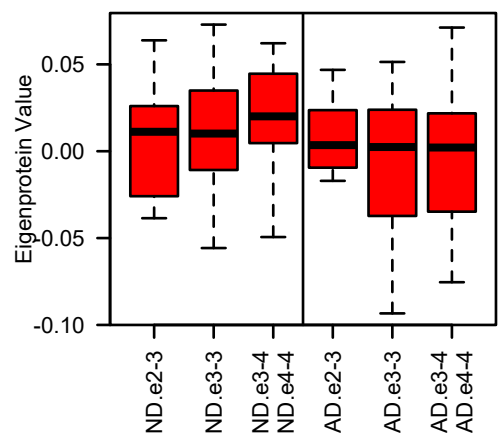

**bicor=-0.18,  $p=3e-04$**   
**cor=-0.18,  $p=0.00021$**

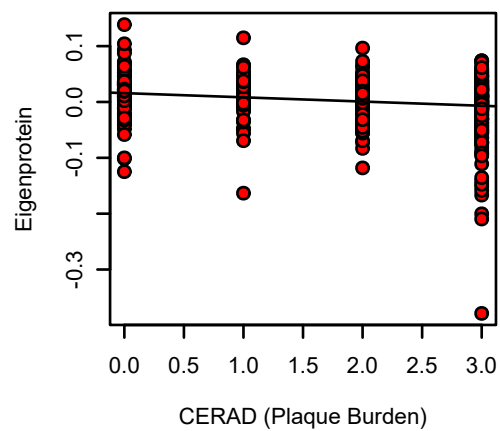

**bicor=-0.2,  $p=3.1e-05$**   
**cor=-0.19,  $p=9.1e-05$**

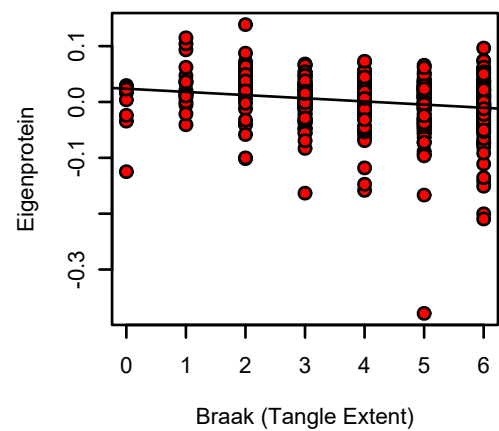

**bicor=-0.33,  $p=2.5e-05$**   
**cor=-0.34,  $p=1.2e-05$**

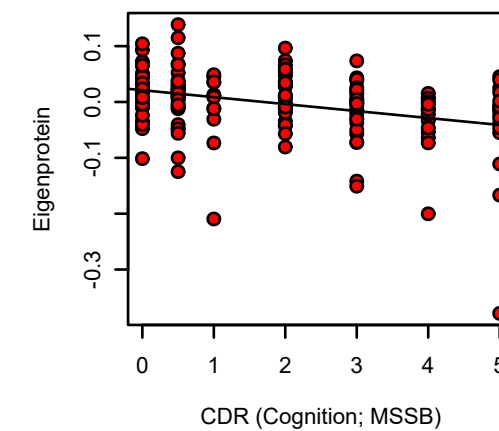

**bicor=0.25,  $p=0.0013$**   
**cor=0.18,  $p=0.02$**

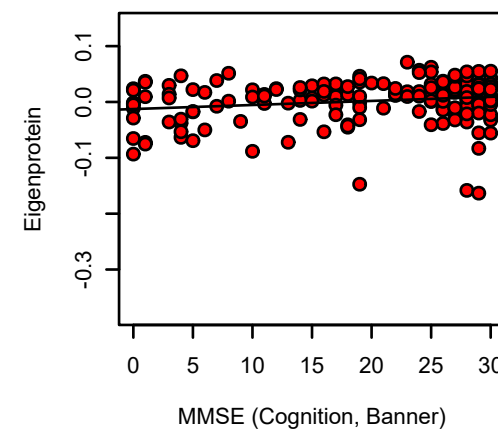

**bicor=0.28,  $p=0.034$**   
**cor=0.35,  $p=0.0082$**

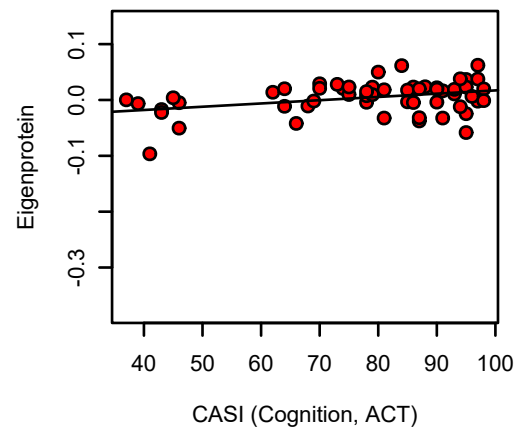

**bicor=-0.01,  $p=0.83$**   
**cor=0.023,  $p=0.64$**

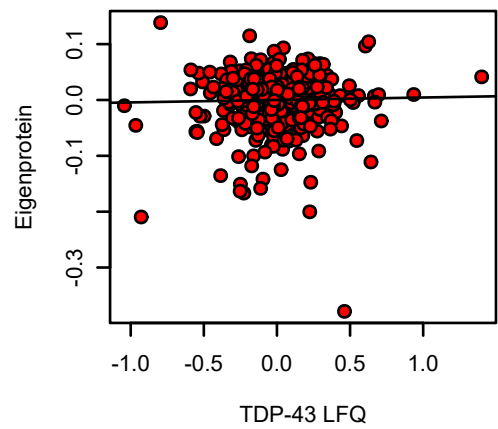

**bicor=-0.057,  $p=0.25$**   
**cor=-0.16,  $p=0.001$**

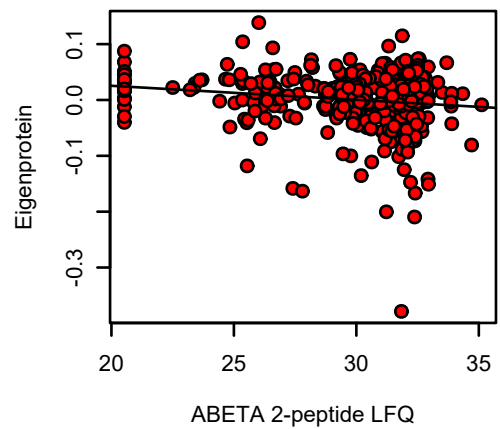

**bicor=0.006,  $p=0.9$**   
**cor=-0.1,  $p=0.041$**

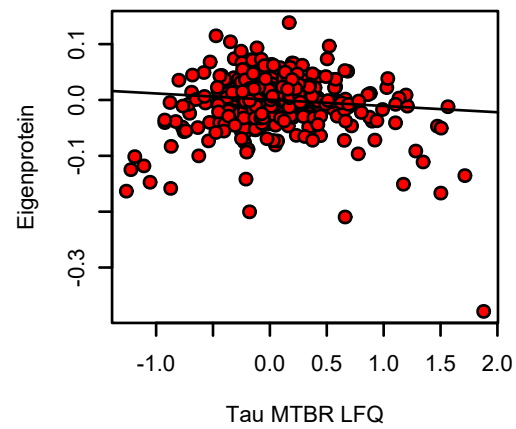

**bicor=0.64,  $p=4e-50$**   
**cor=0.69,  $p=1.6e-60$**

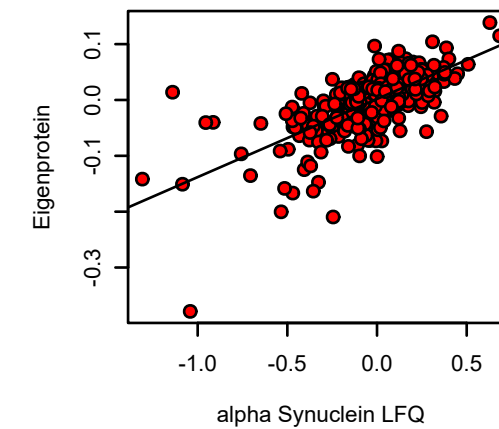

**M1 turquoise**  
**K-W  $p = 2.8e-11$**

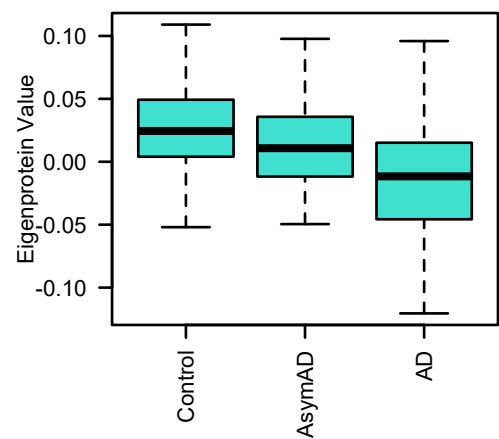

**M1 turquoise**  
**ND K-W  $p = 0.32$  | AD K-W  $p = 0.17$**

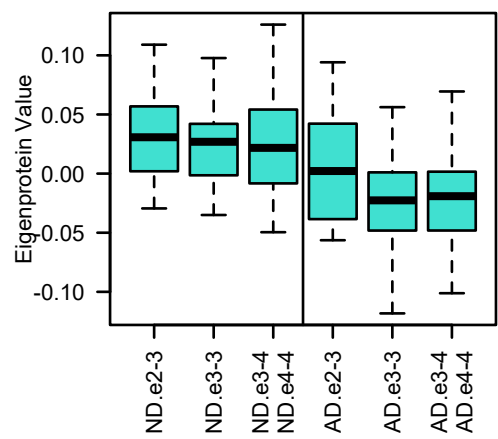

**bicor=-0.31,  $p=5e-11$**   
**cor=-0.29,  $p=1.5e-09$**

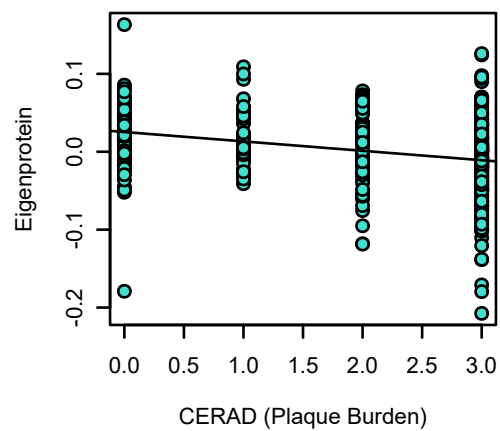

**bicor=-0.33,  $p=3.1e-12$**   
**cor=-0.28,  $p=5.5e-09$**

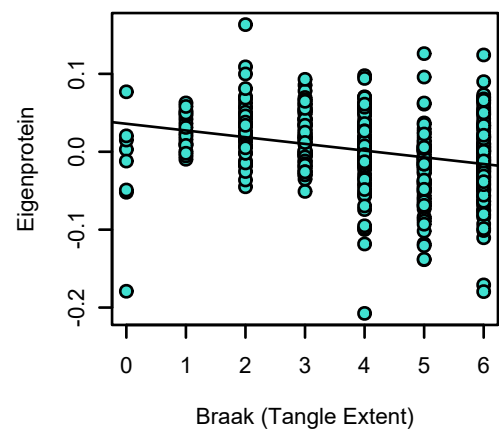

**bicor=-0.28,  $p=0.00029$**   
**cor=-0.31,  $p=7e-05$**

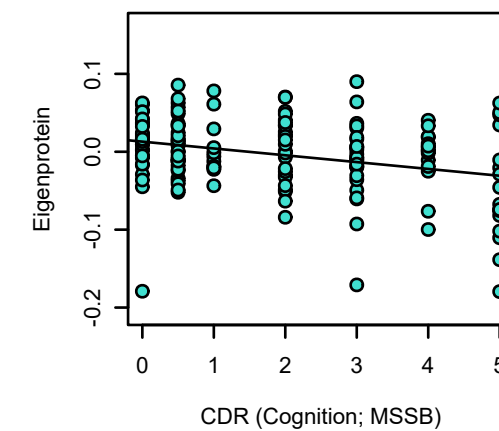

**bicor=0.47,  $p=9.8e-11$**   
**cor=0.44,  $p=2.7e-09$**

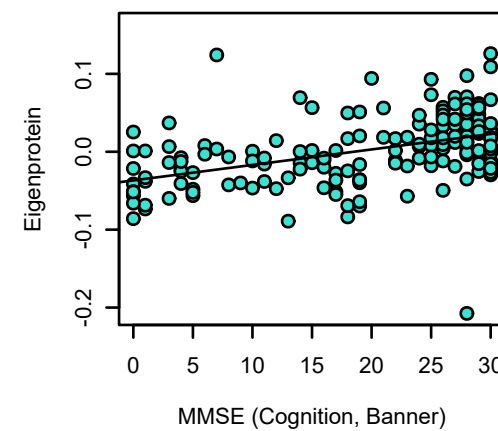

**bicor=0.32,  $p=0.015$**   
**cor=0.31,  $p=0.02$**

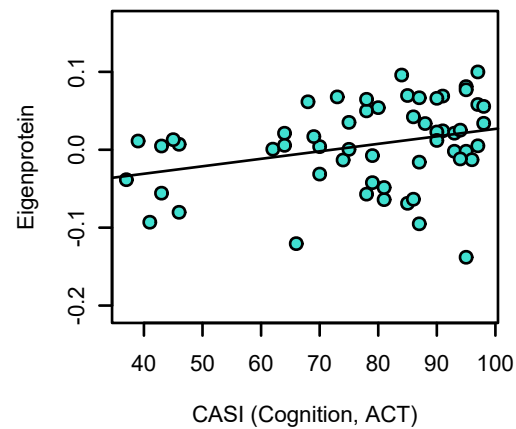

**bicor=-0.17,  $p=0.00046$**   
**cor=-0.12,  $p=0.014$**

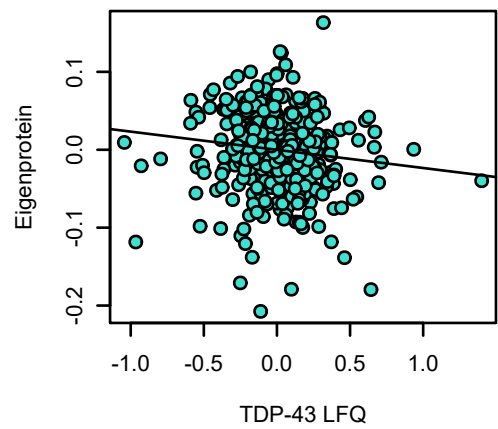

**bicor=-0.18,  $p=0.00023$**   
**cor=-0.24,  $p=6.7e-07$**

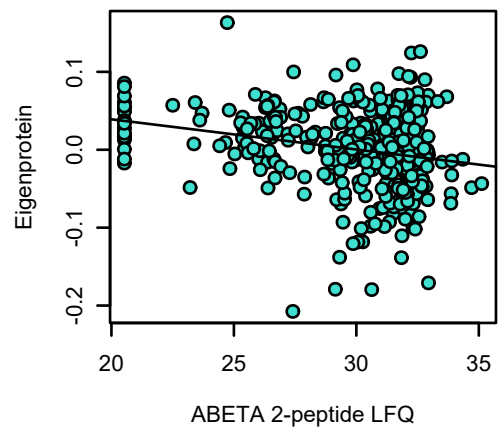

**bicor=-0.33,  $p=5.8e-12$**   
**cor=-0.34,  $p=8.5e-13$**

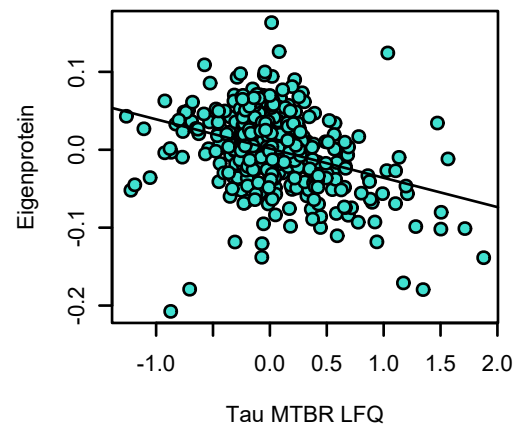

**bicor=0.53,  $p=1.5e-31$**   
**cor=0.51,  $p=4e-29$**

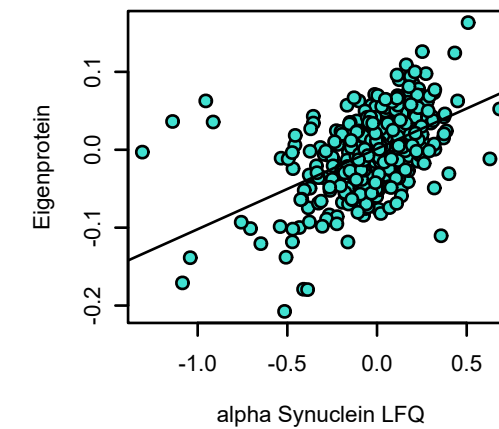

**M12 tan**  
**K-W  $p = 1.3e-06$**

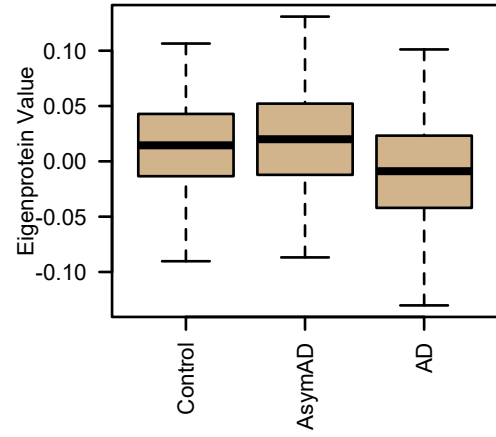

**M12 tan**  
**ND K-W  $p = 0.27$  | AD K-W  $p = 0.21$**

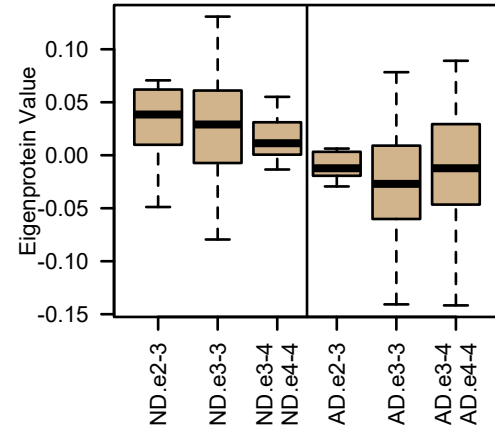

**bicor=-0.22,  $p=8.7e-06$**   
**cor=-0.21,  $p=1.5e-05$**

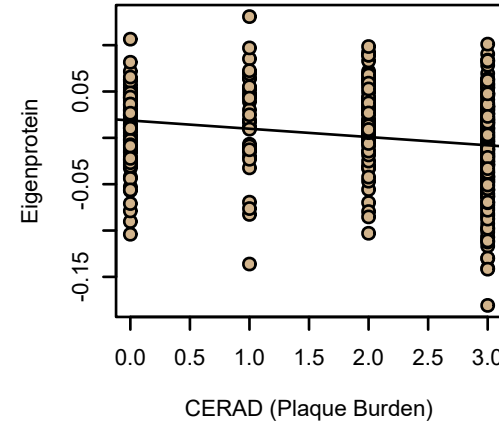

**bicor=-0.23,  $p=1.7e-06$**   
**cor=-0.2,  $p=3.7e-05$**

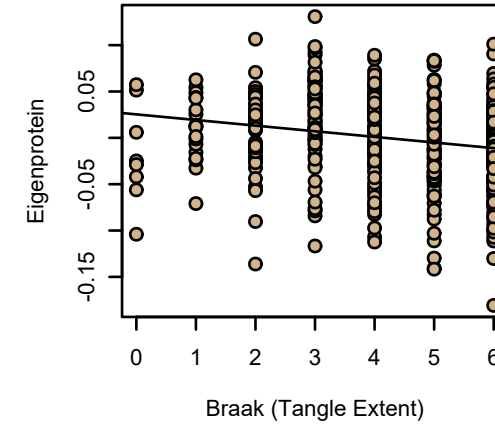

**bicor=-0.061,  $p=0.45$**   
**cor=-0.092,  $p=0.25$**

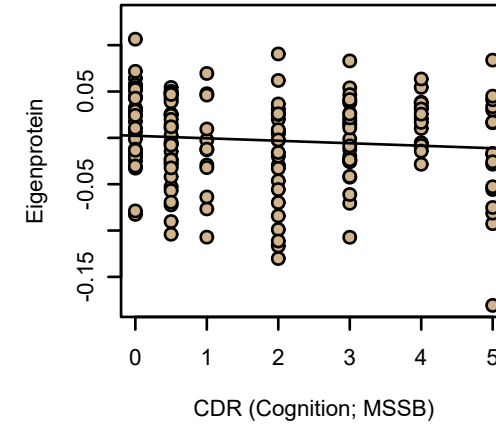

**bicor=0.3,  $p=9.1e-05$**   
**cor=0.26,  $p=0.00069$**

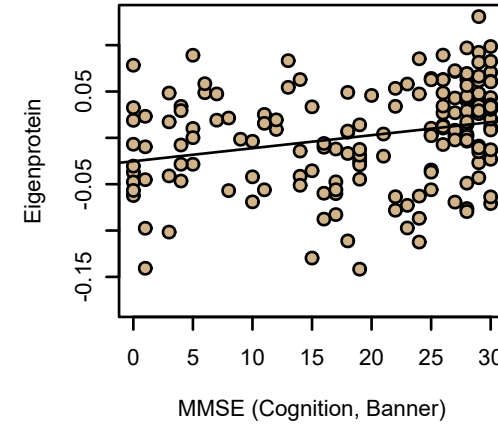

**bicor=0.23,  $p=0.089$**   
**cor=0.21,  $p=0.12$**

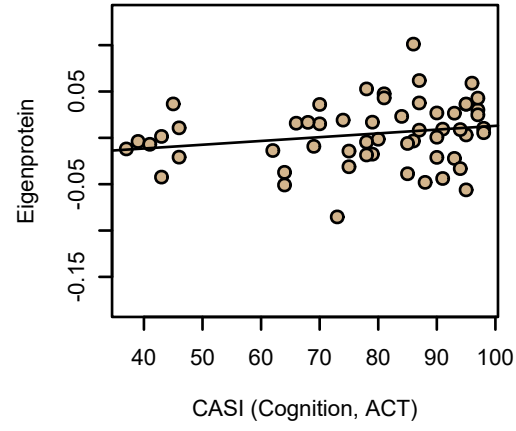

**bicor=-0.11,  $p=0.029$**   
**cor=-0.12,  $p=0.014$**

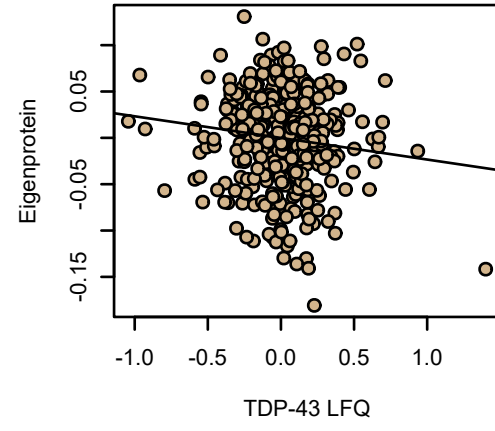

**bicor=-0.13,  $p=0.0065$**   
**cor=-0.2,  $p=3.7e-05$**

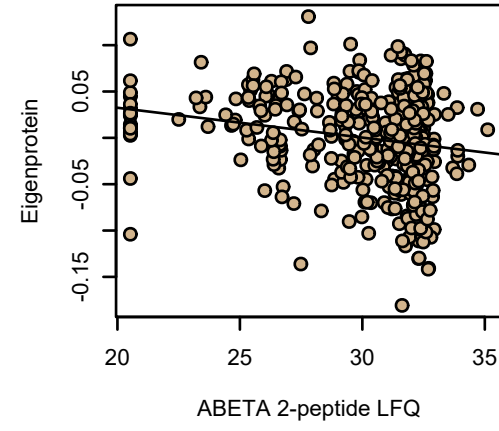

**bicor=-0.35,  $p=6.9e-14$**   
**cor=-0.32,  $p=2e-11$**

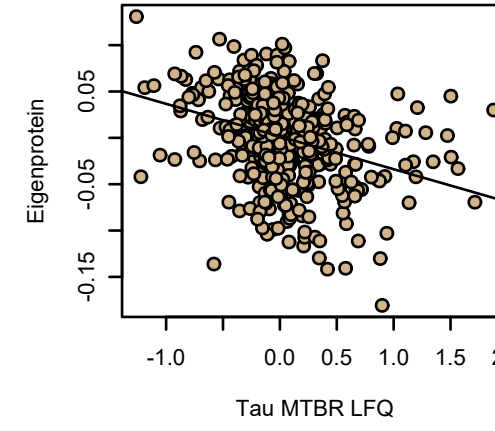

**bicor=-0.083,  $p=0.091$**   
**cor=-0.075,  $p=0.13$**

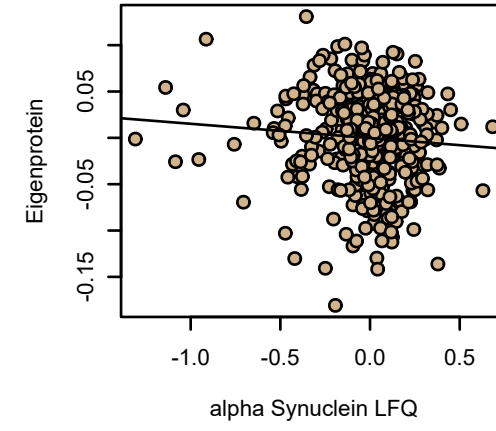

**M7 black**  
**K-W  $p = 0.18$**

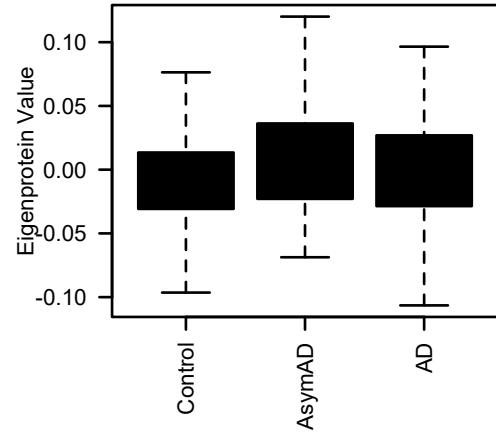

**M7 black**  
**ND K-W  $p = 0.59$  | AD K-W  $p = 0.47$**

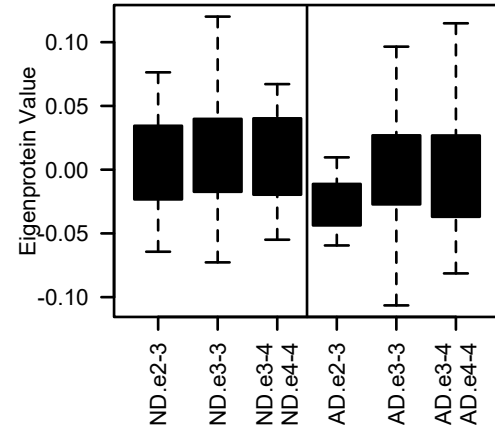

**bicor=0.055,  $p=0.26$**   
**cor=0.038,  $p=0.44$**

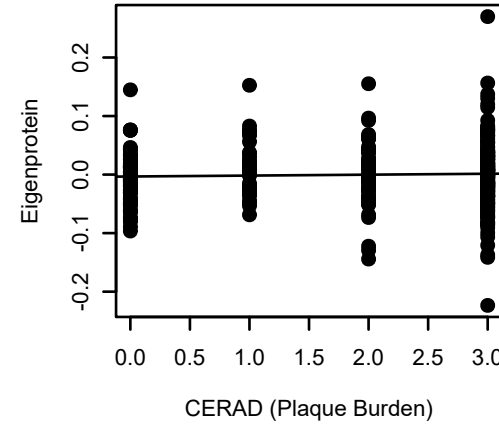

**bicor=0.027,  $p=0.58$**   
**cor=0.02,  $p=0.68$**

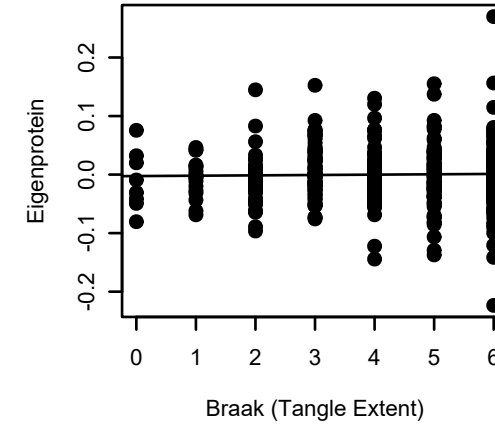

**bicor=0.11,  $p=0.18$**   
**cor=0.075,  $p=0.35$**

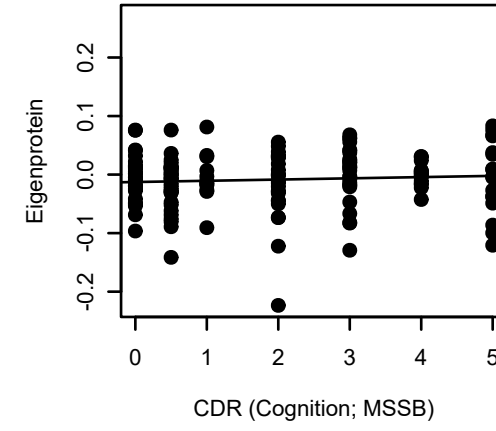

**bicor=0.24,  $p=0.0022$**   
**cor=0.23,  $p=0.0028$**

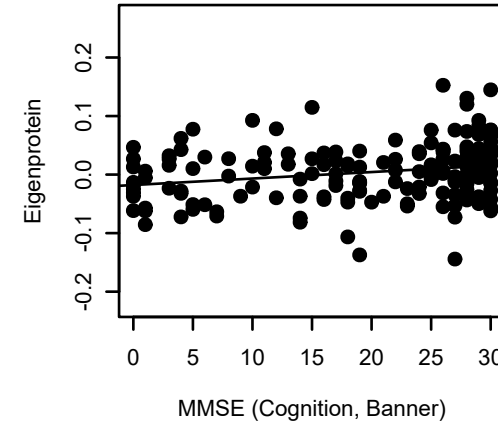

**bicor=-0.091,  $p=0.5$**   
**cor=-0.015,  $p=0.91$**

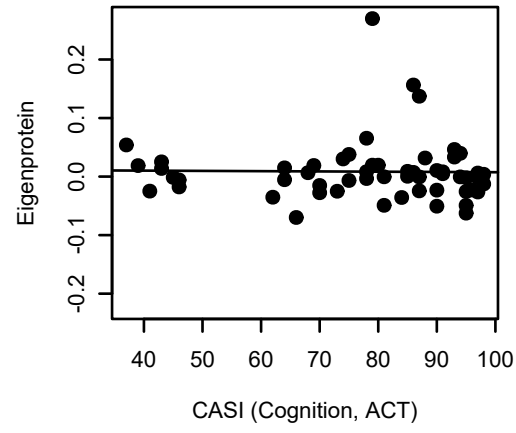

**bicor=0.11,  $p=0.024$**   
**cor=0.13,  $p=0.0077$**

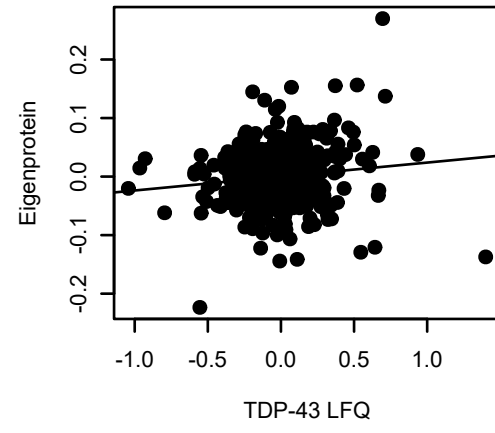

**bicor=-0.044,  $p=0.37$**   
**cor=-0.037,  $p=0.45$**

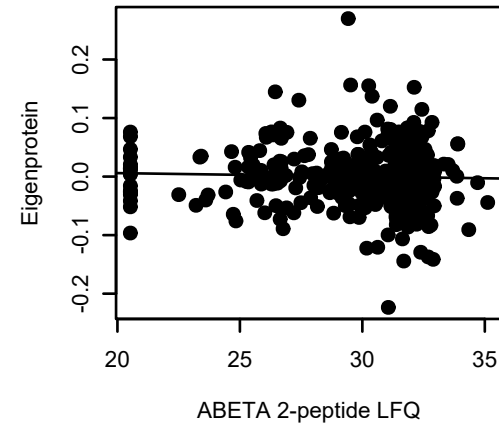

**bicor=0.0037,  $p=0.94$**   
**cor=0.026,  $p=0.6$**

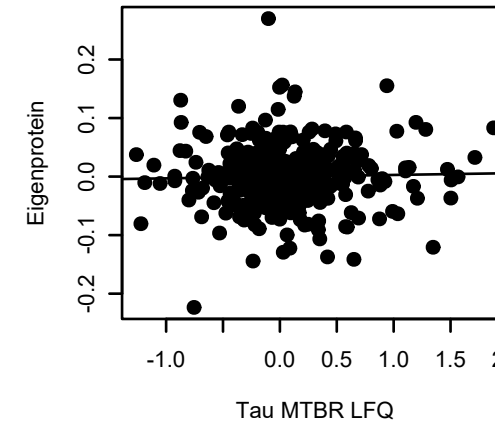

**bicor=0.025,  $p=0.61$**   
**cor=0.0038,  $p=0.94$**

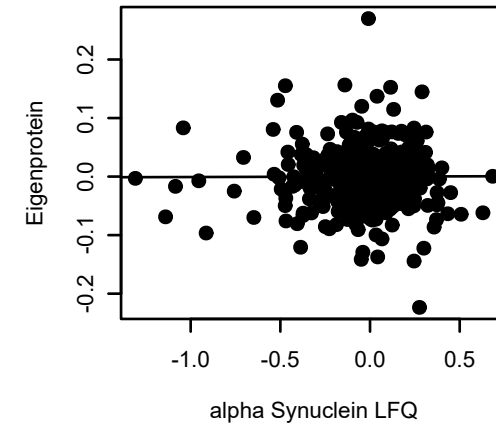

**M9 magenta**  
K-W  $p = 0.05$

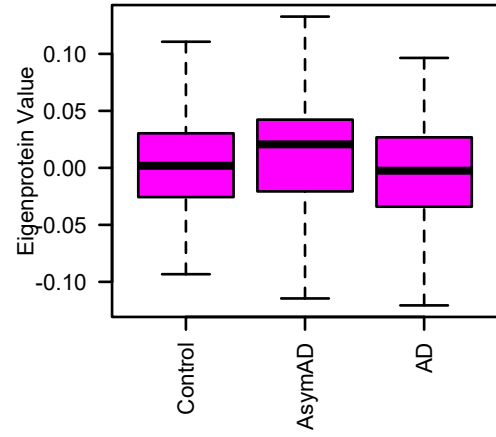

**M9 magenta**  
ND K-W  $p = 0.35$  | AD K-W  $p = 0.41$

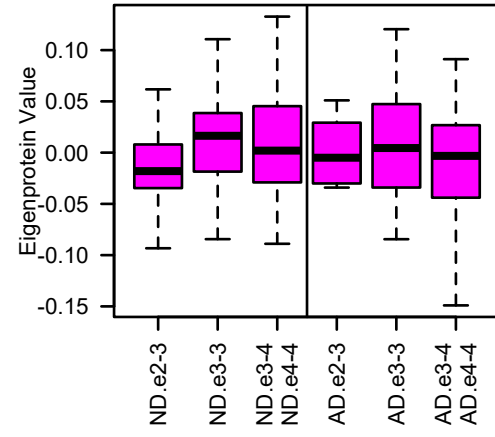

**bicor=-0.055, p=0.26**  
**cor=-0.06, p=0.22**

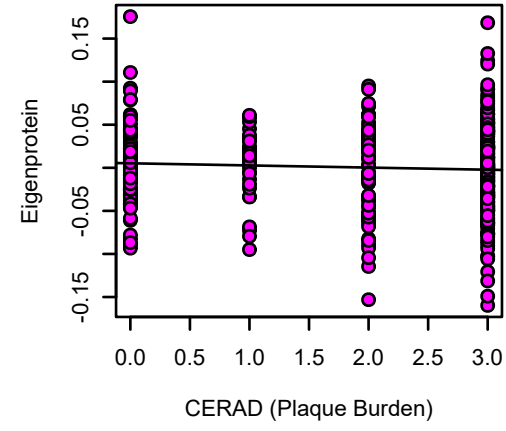

**bicor=-0.094, p=0.054**  
**cor=-0.087, p=0.075**

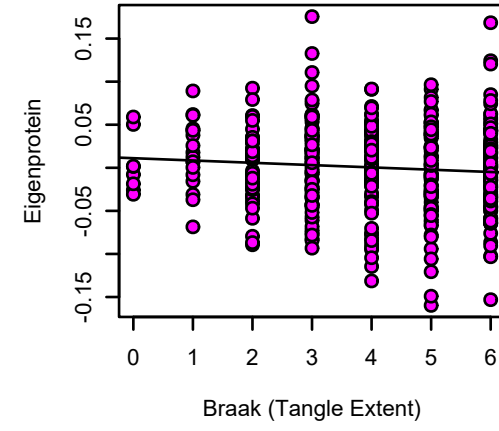

**bicor=-0.1, p=0.2**  
**cor=-0.12, p=0.13**

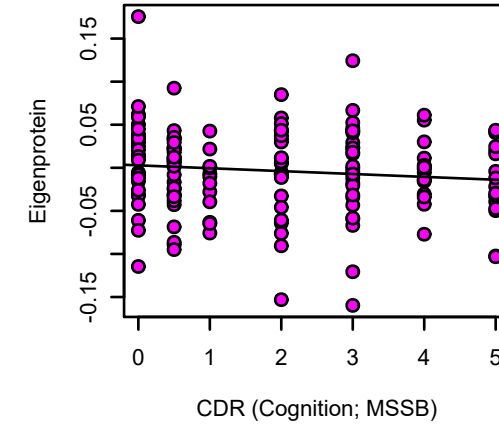

**bicor=0.13, p=0.095**  
**cor=0.14, p=0.071**

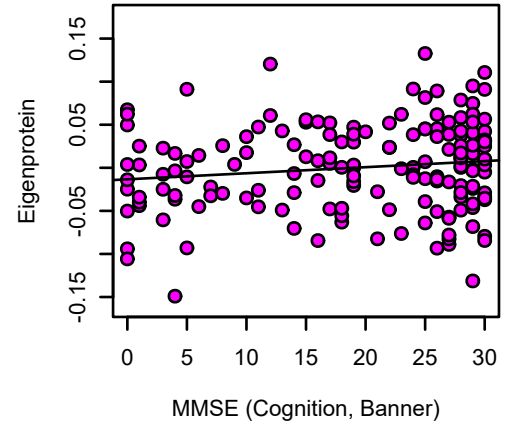

**bicor=0.37, p=0.0055**  
**cor=0.33, p=0.013**

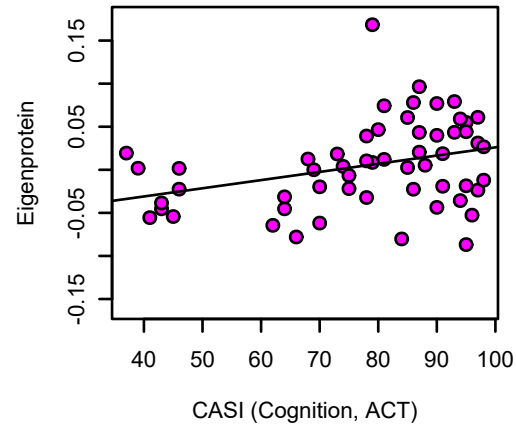

**bicor=0.13, p=0.0057**  
**cor=0.14, p=0.0041**

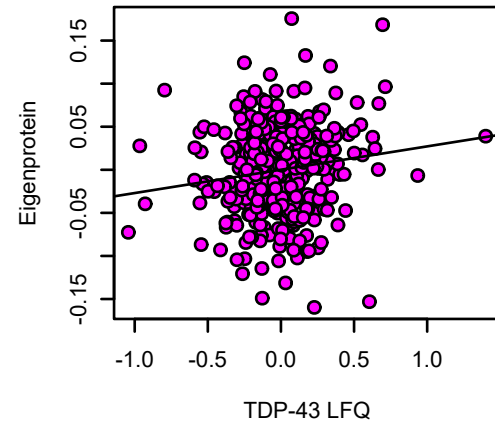

**bicor=-0.023, p=0.64**  
**cor=-0.029, p=0.55**

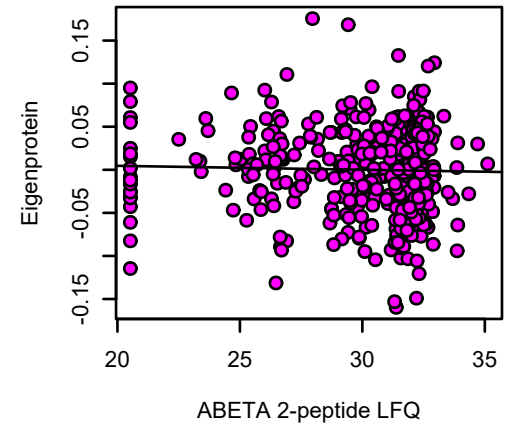

**bicor=-0.052, p=0.28**  
**cor=-0.05, p=0.31**

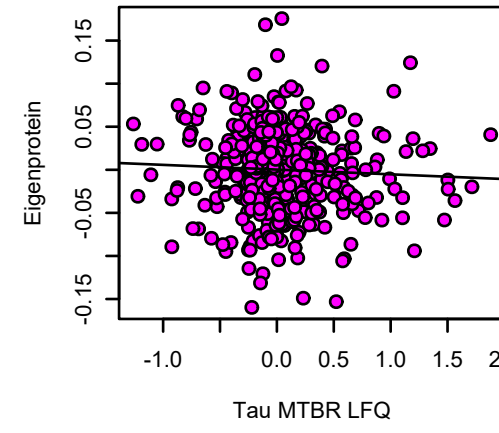

**bicor=0.01, p=0.84**  
**cor=0.037, p=0.45**

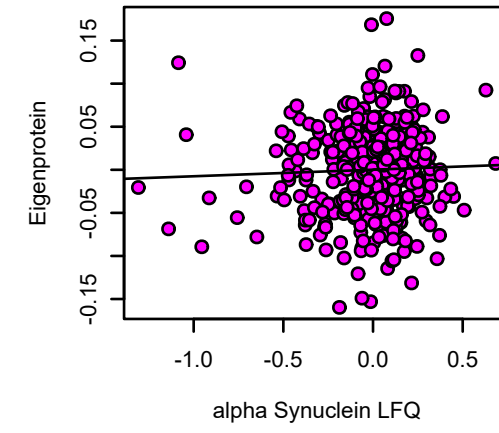



# M5 Extracellular Matrix

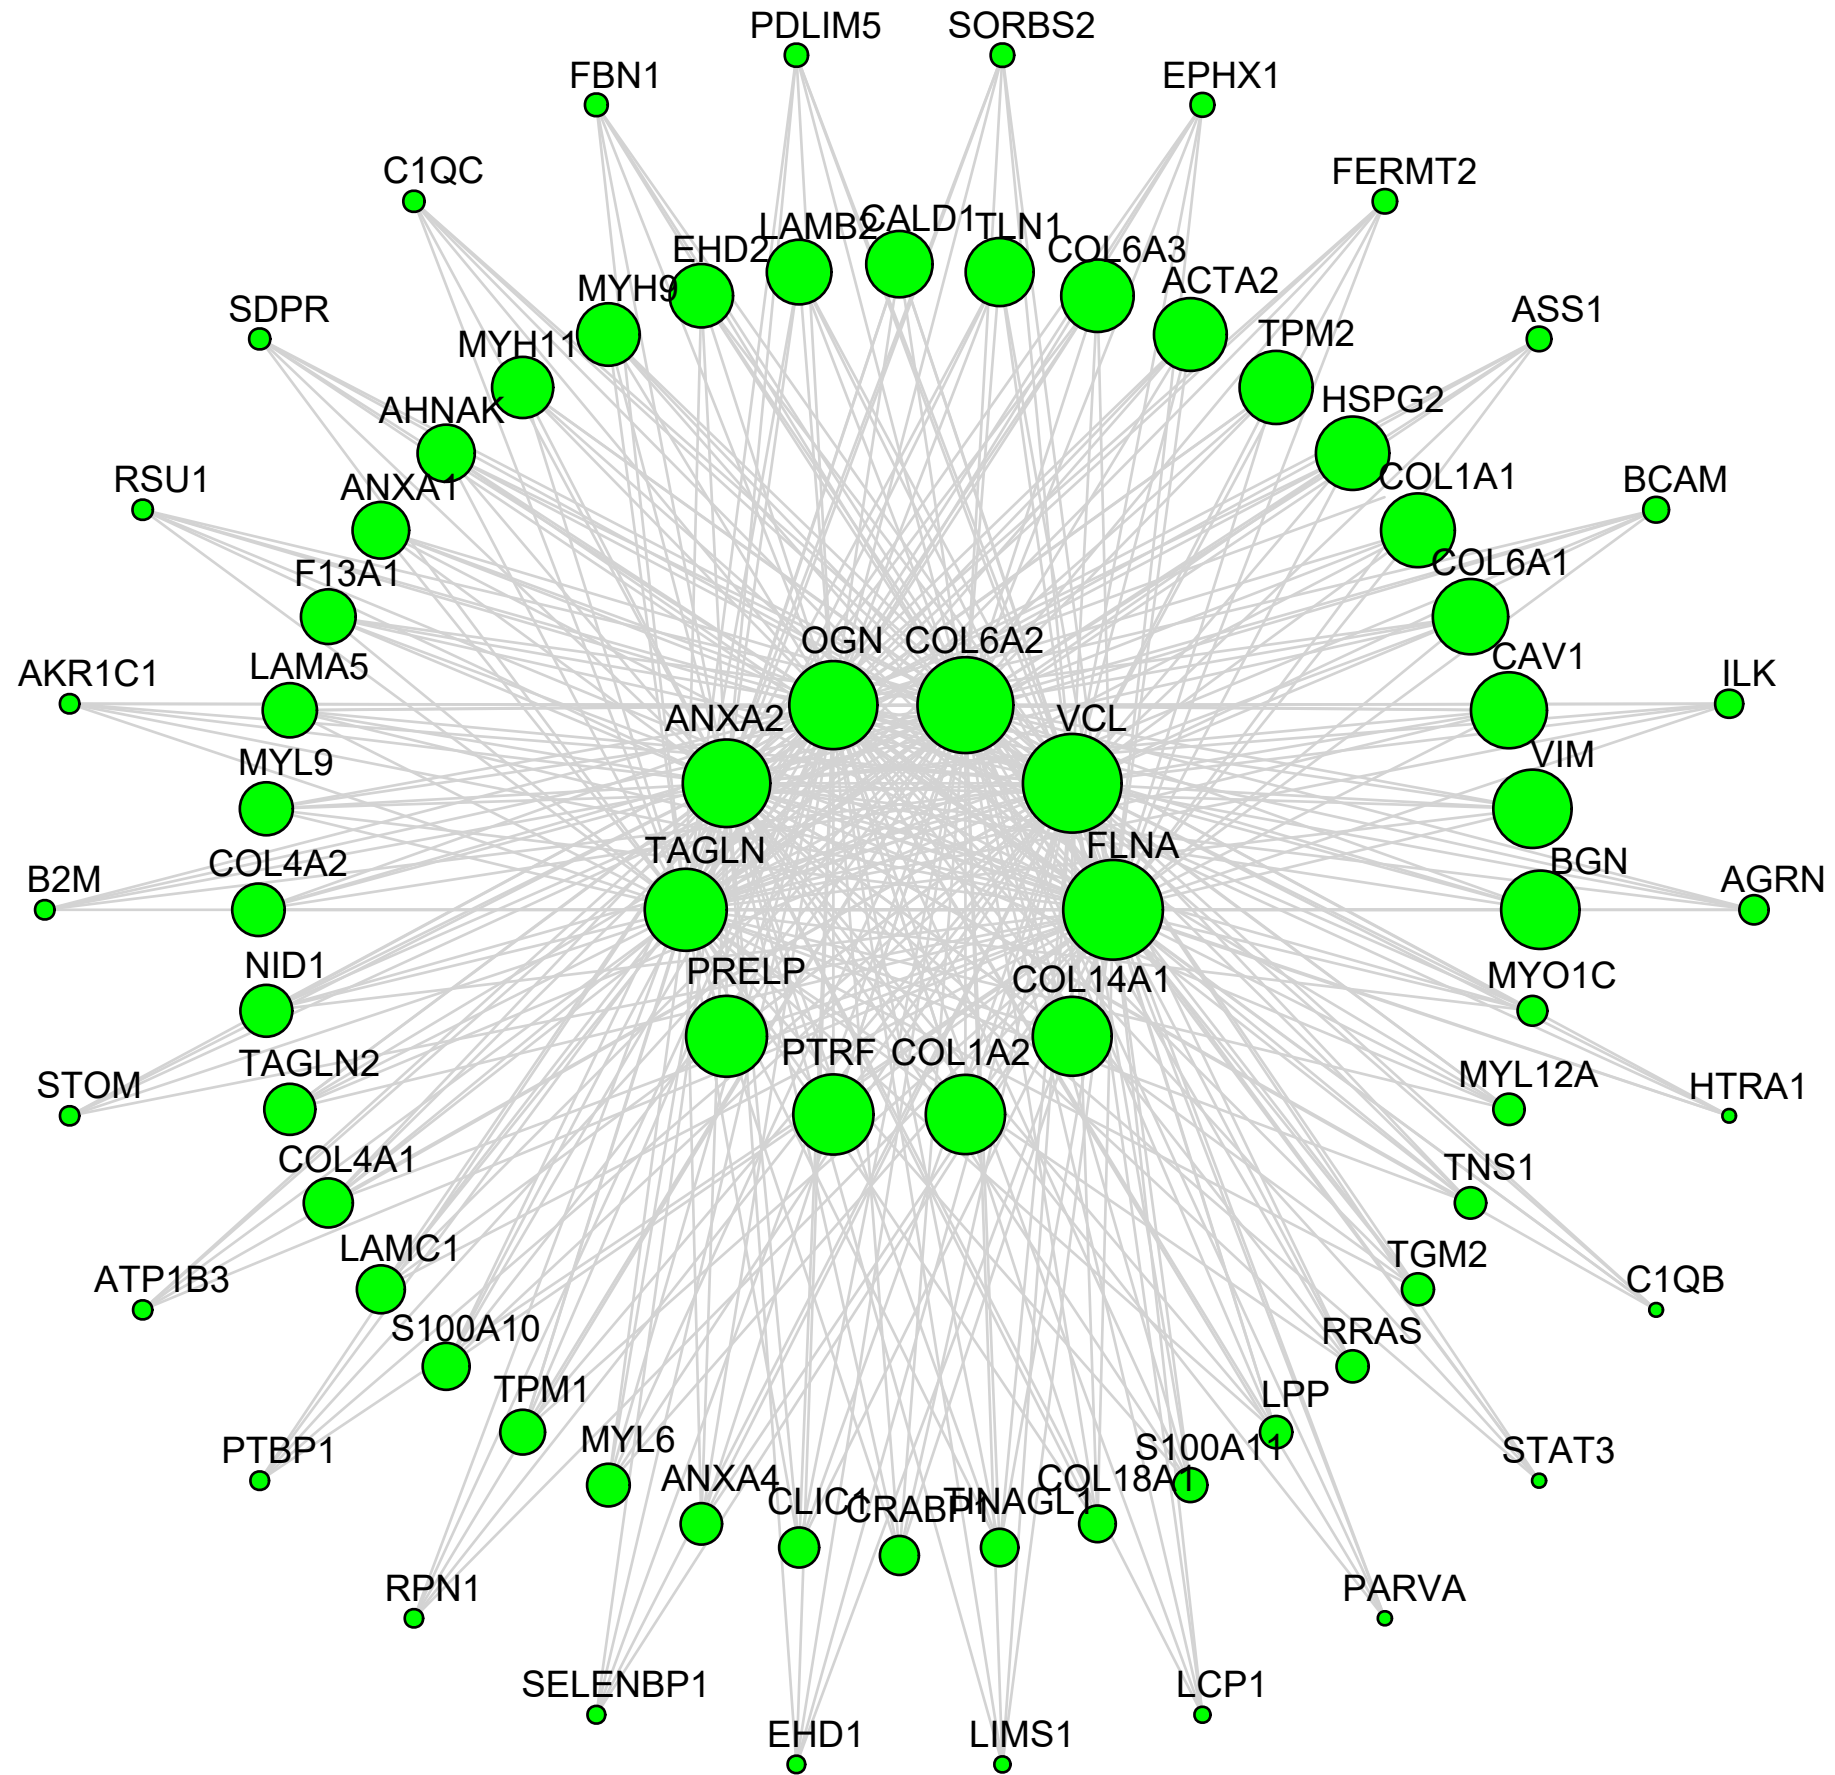











# M11 Chaperone/Protein Folding

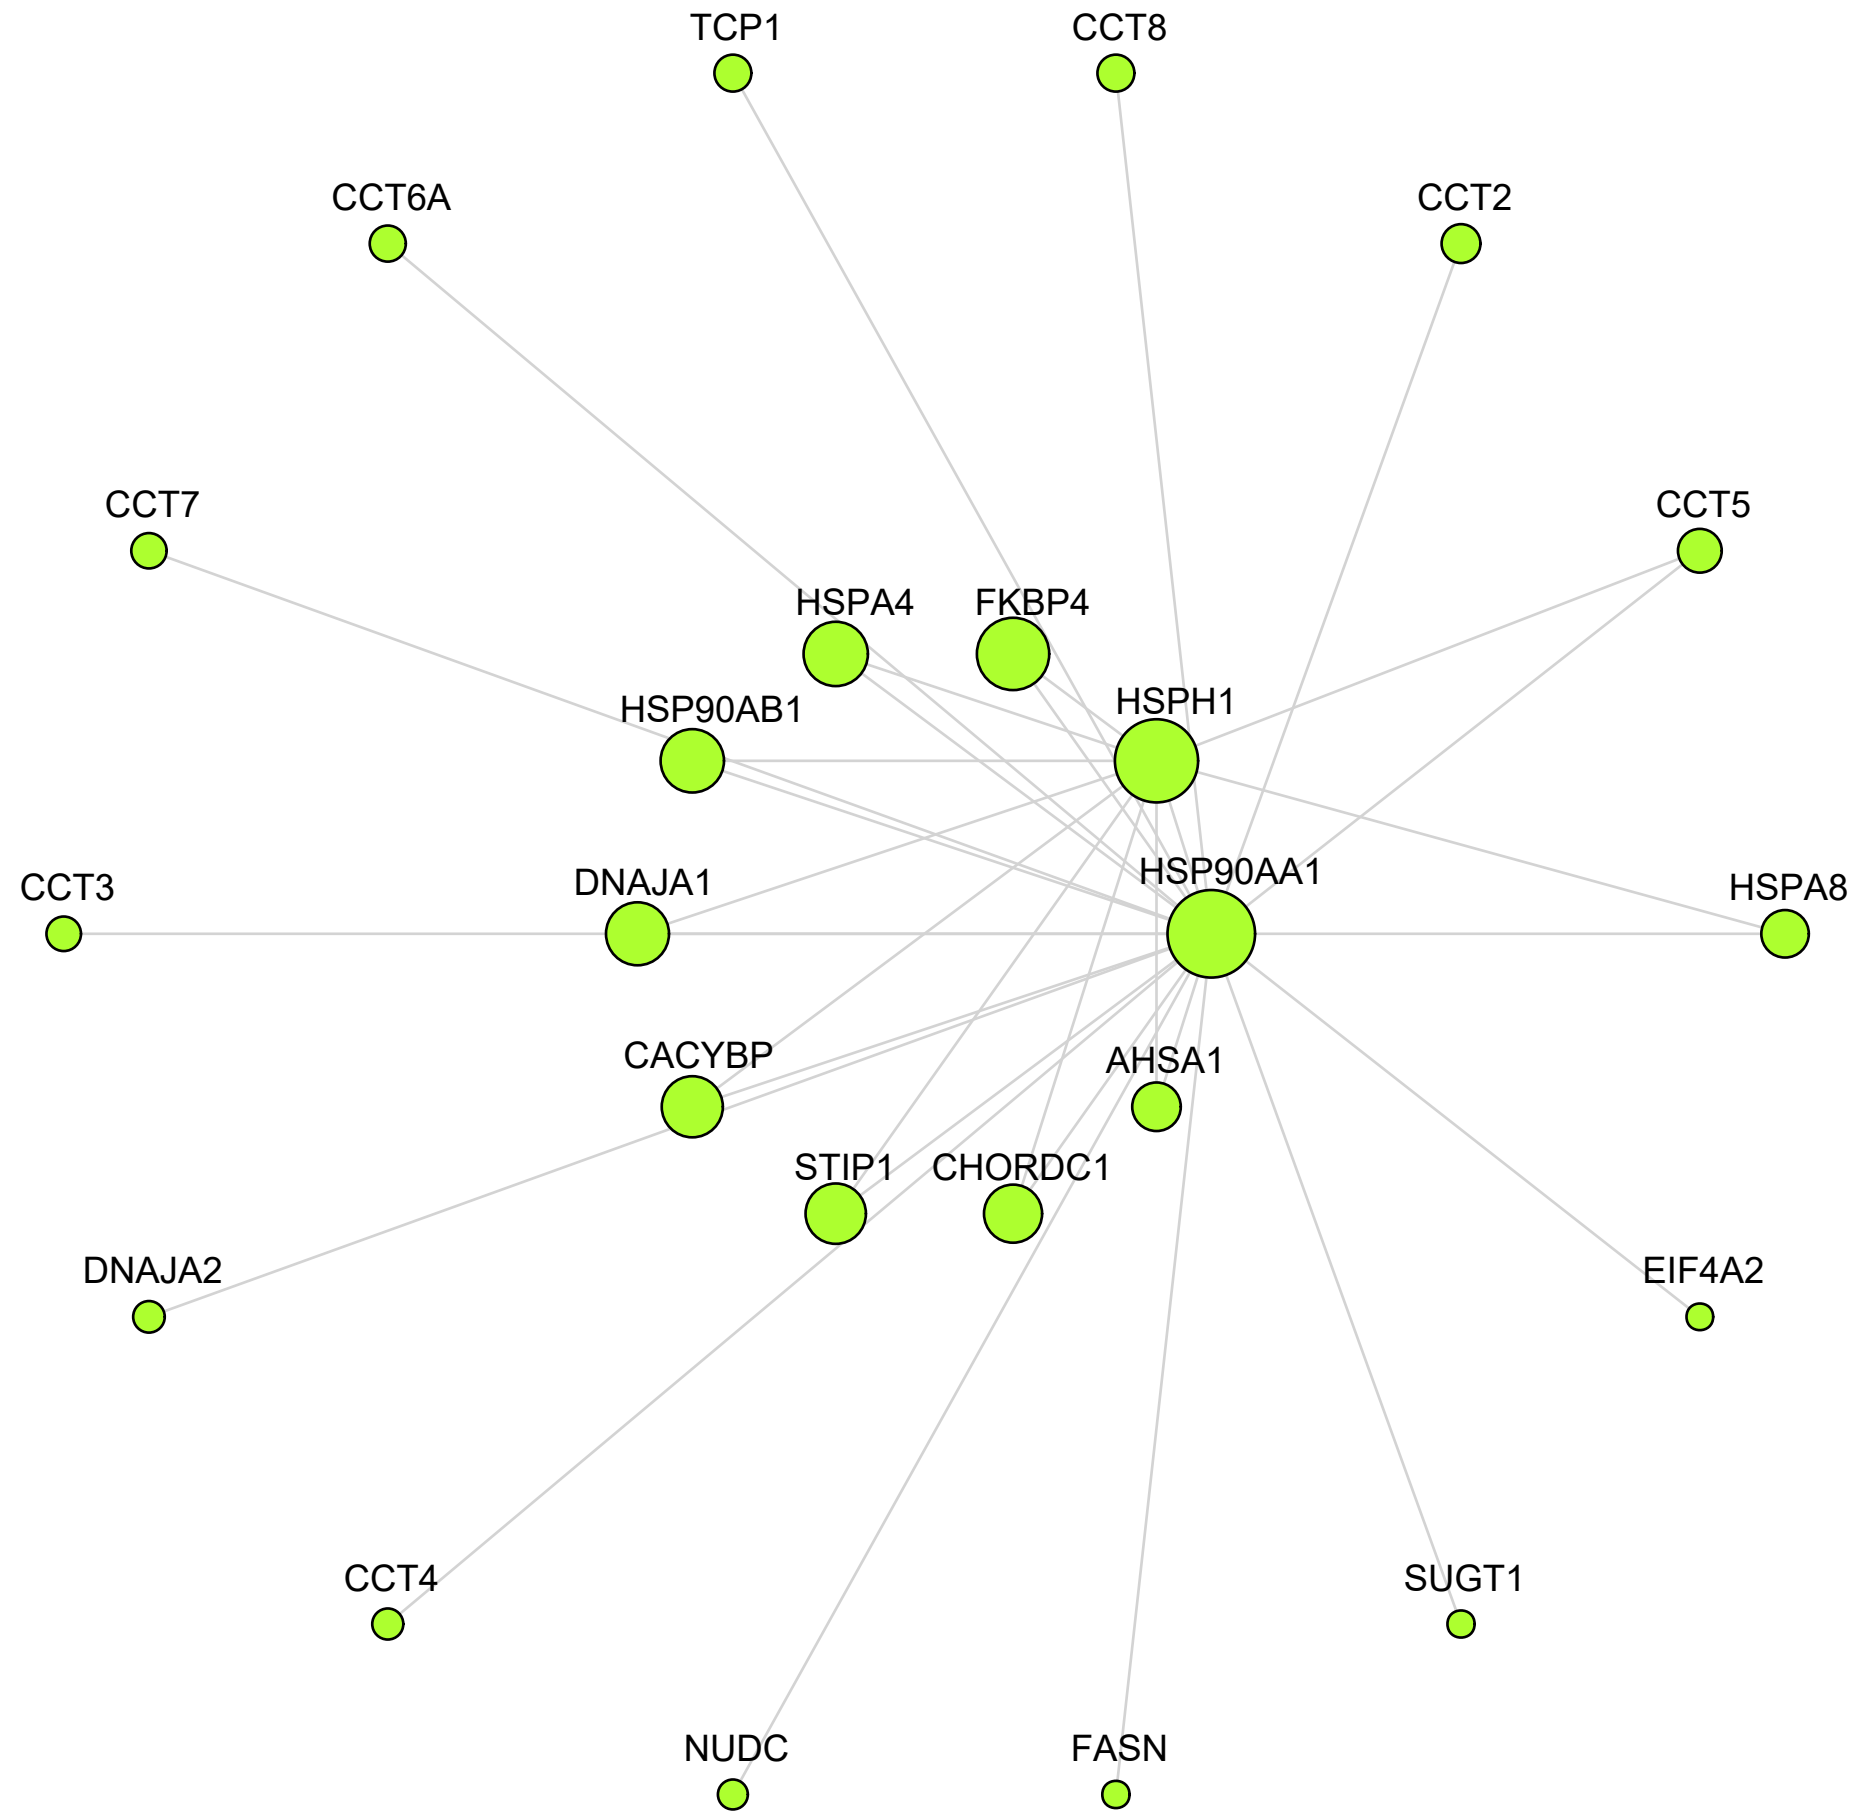



# M13 Unknown

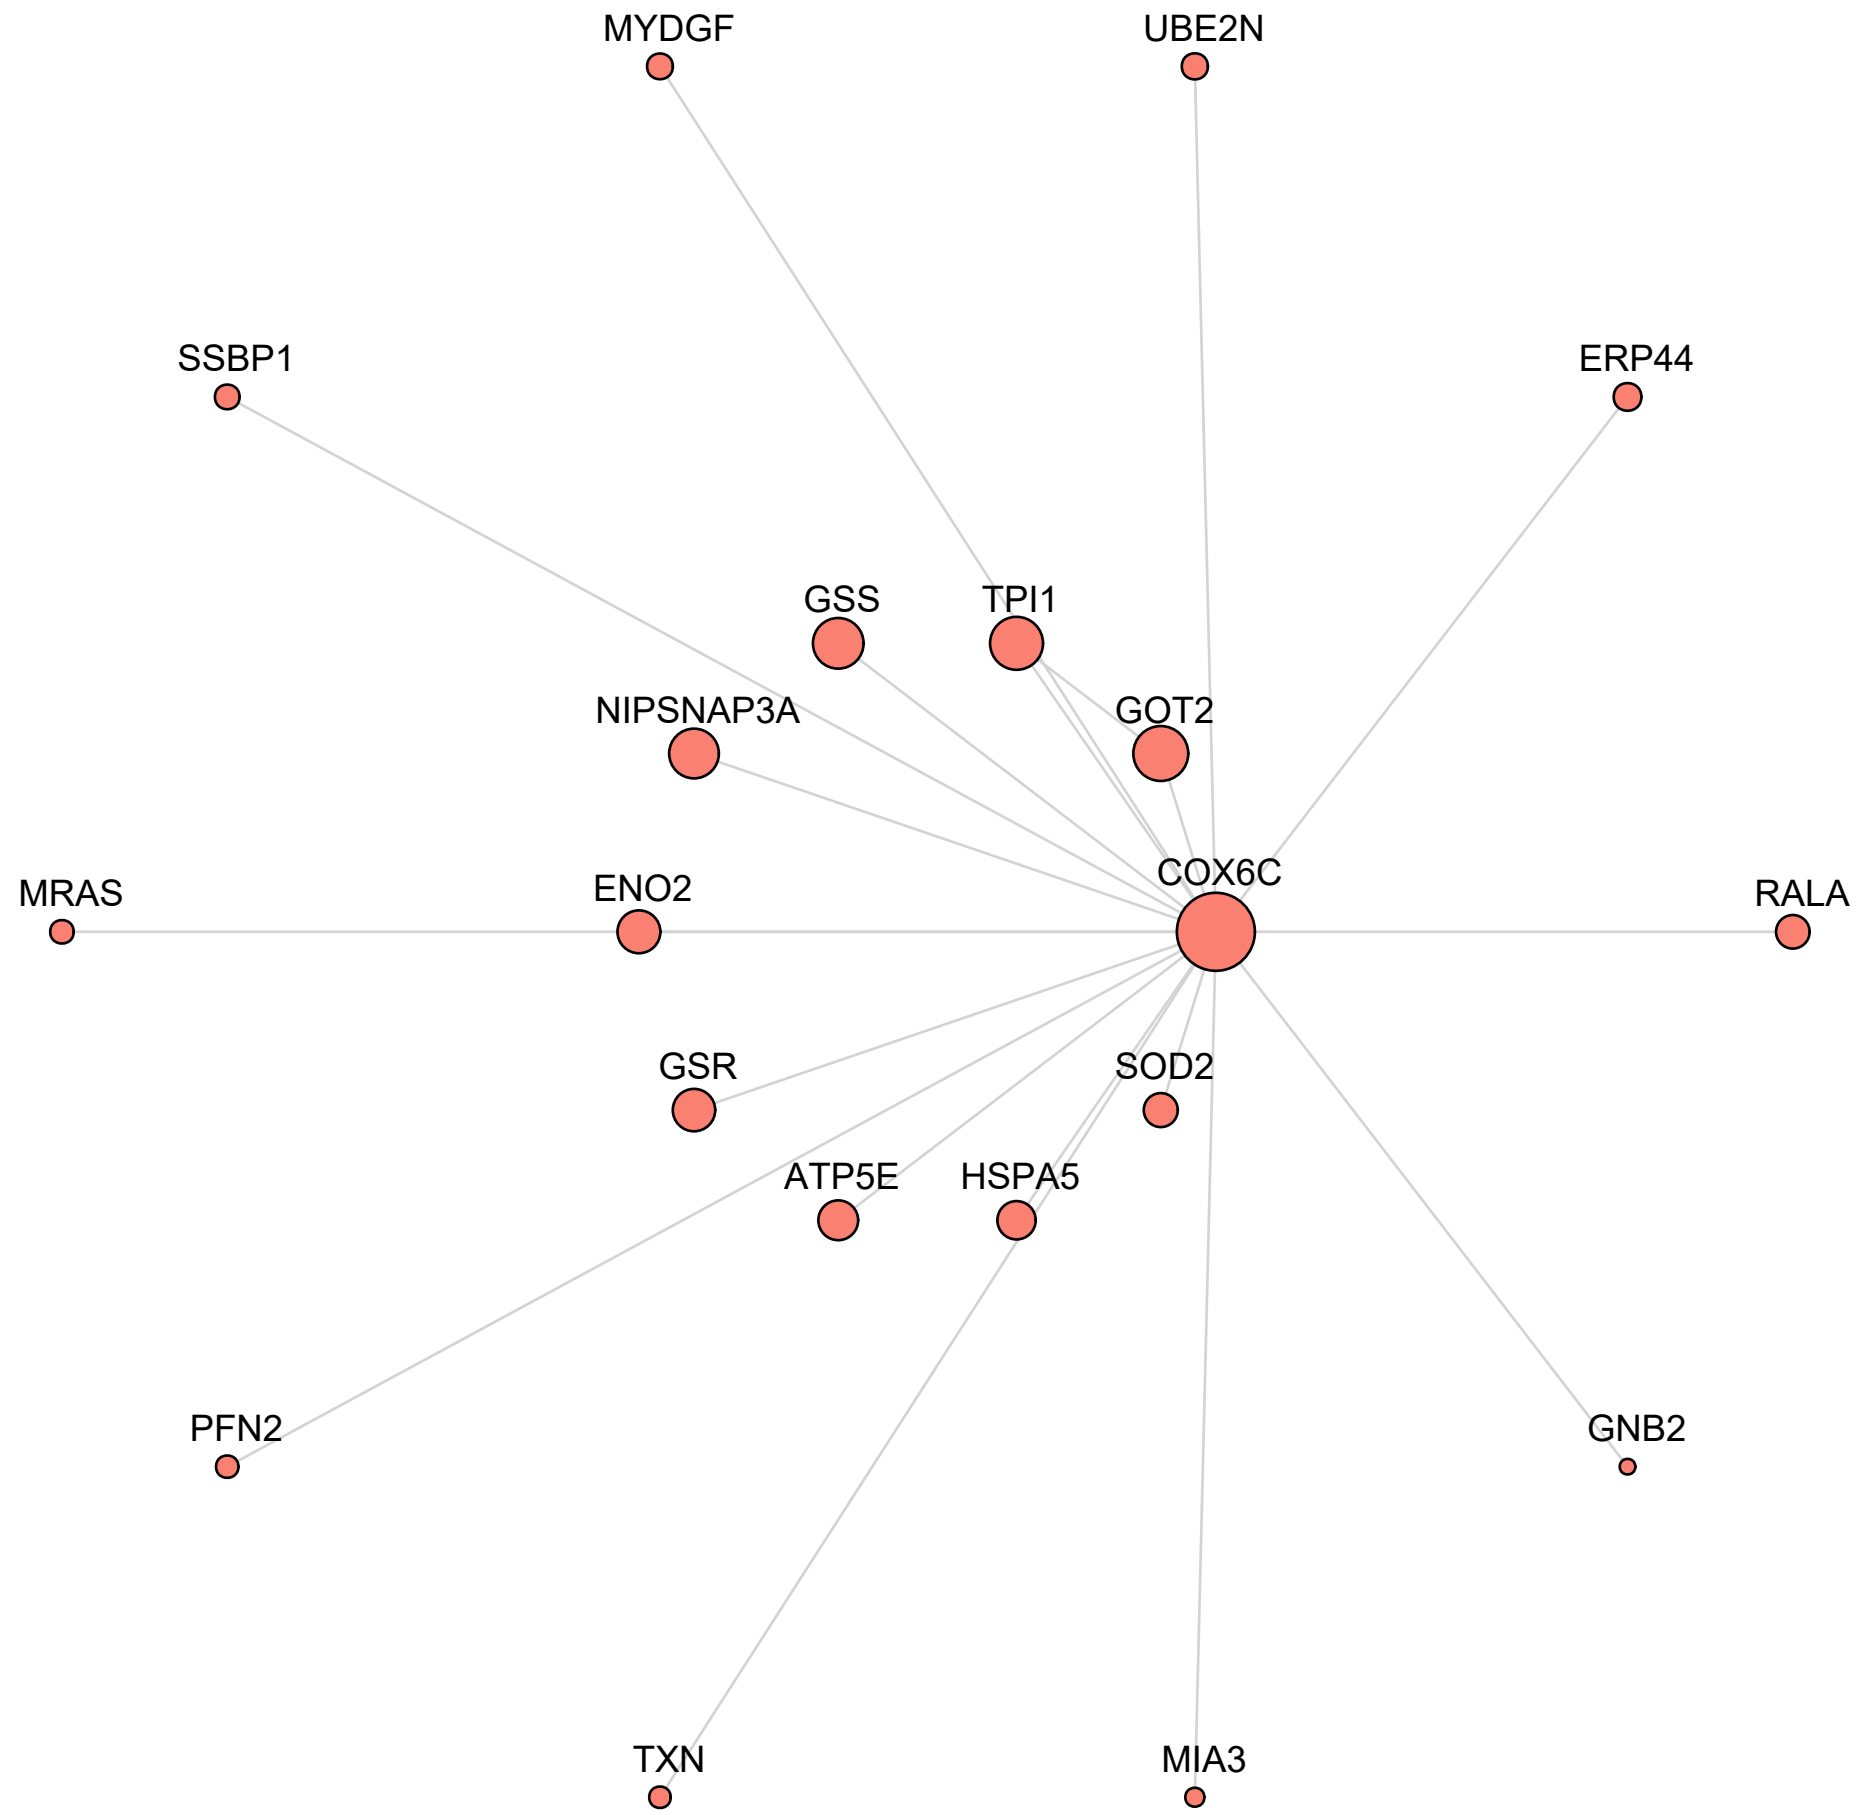



# M6 Cytoskeleton

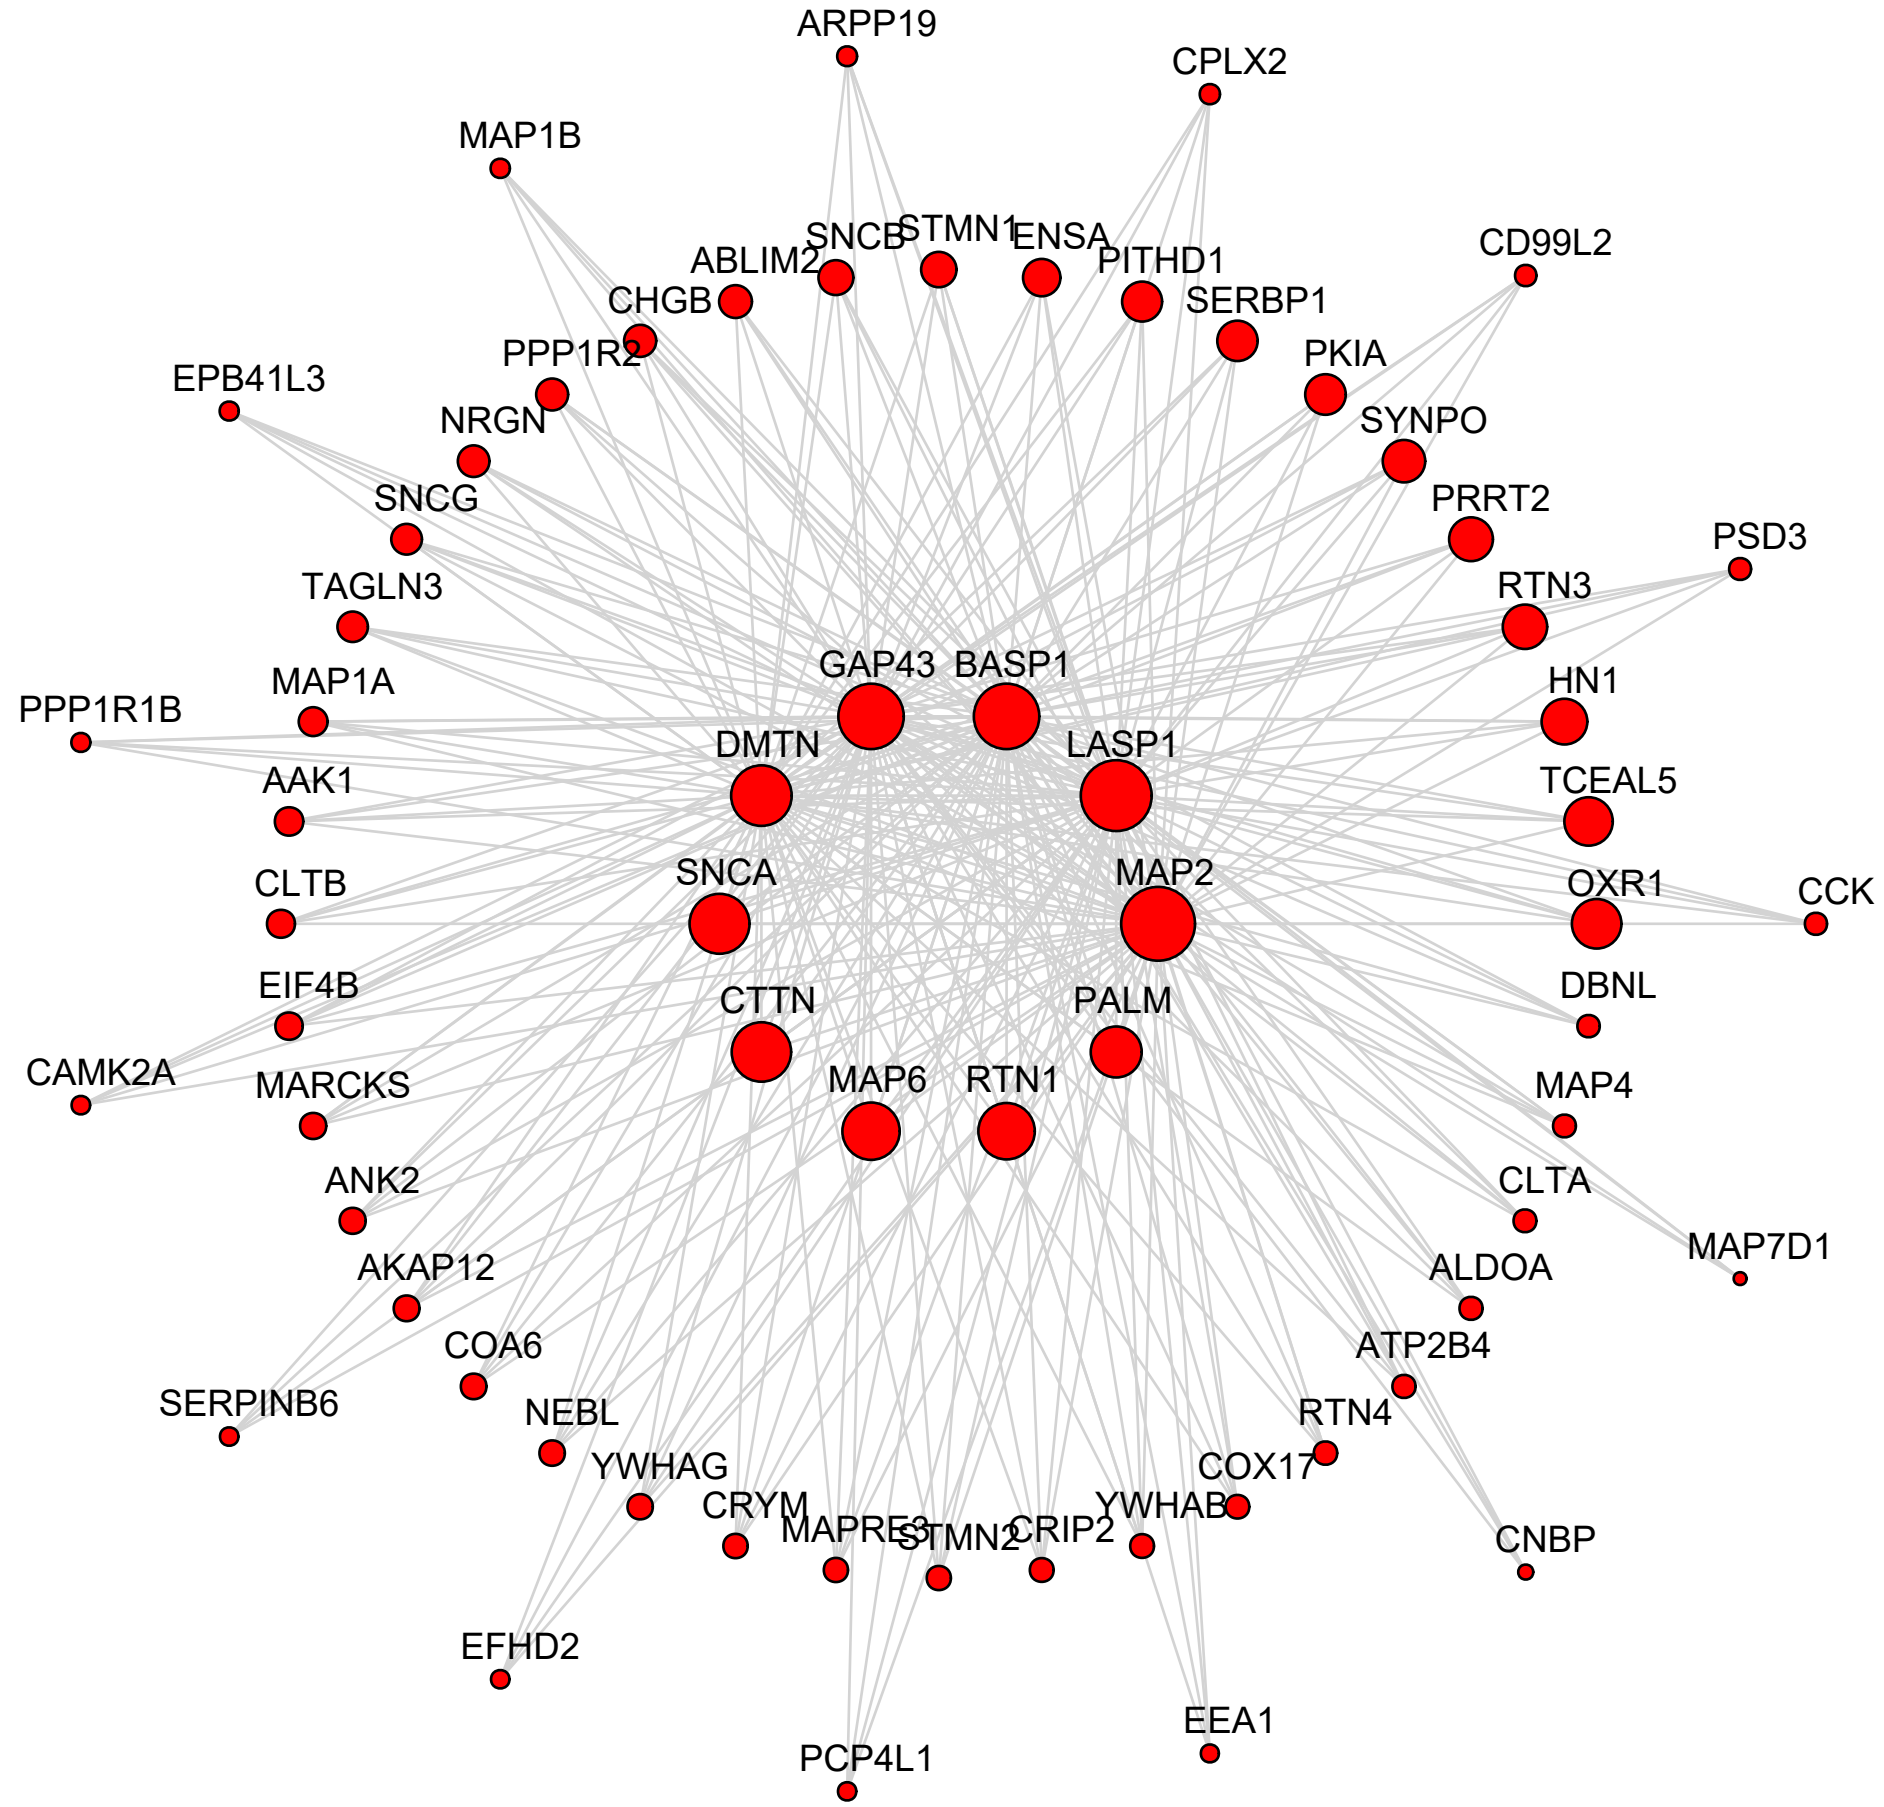













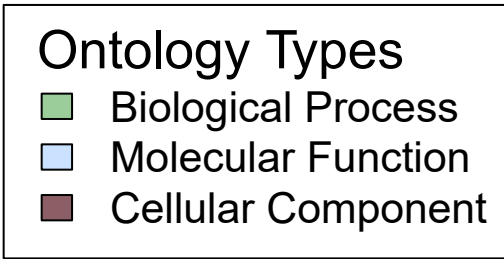

M1 turquoise

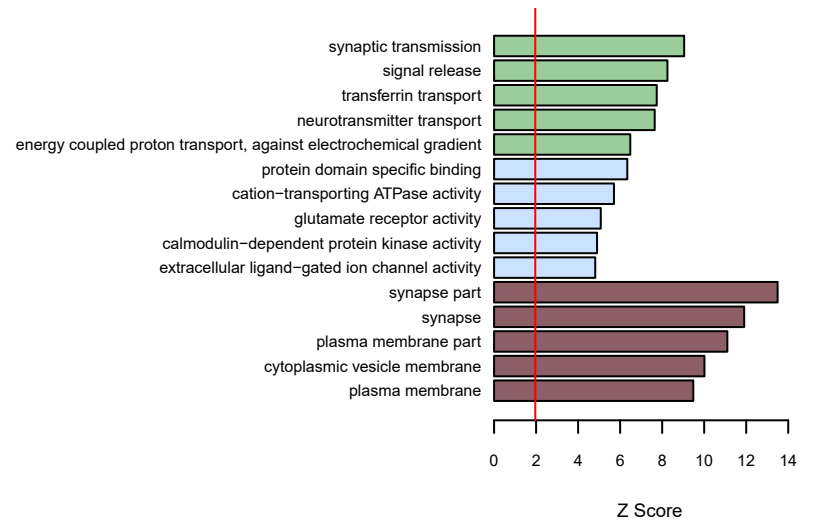

M2 blue

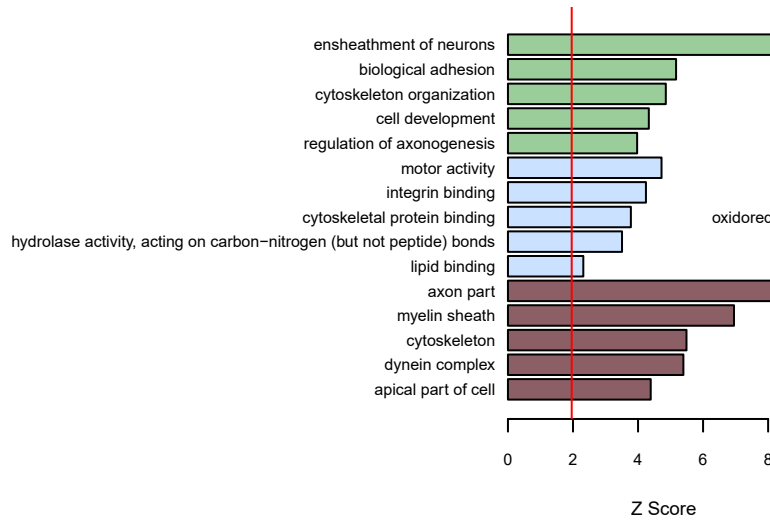

M3 brown

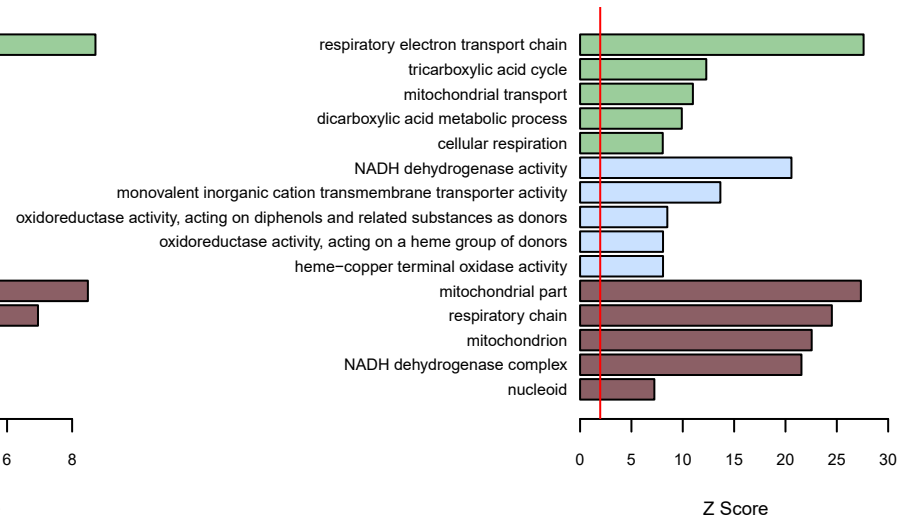

M4 yellow

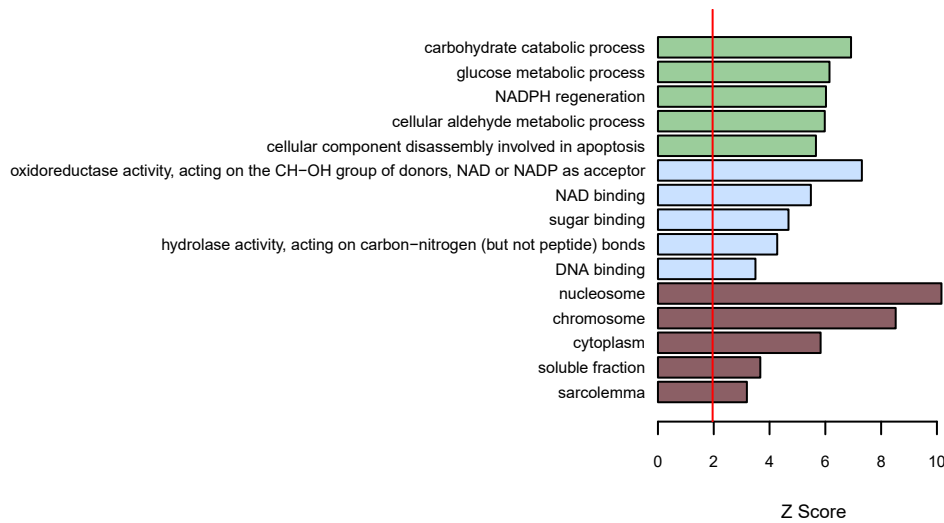

M5 green

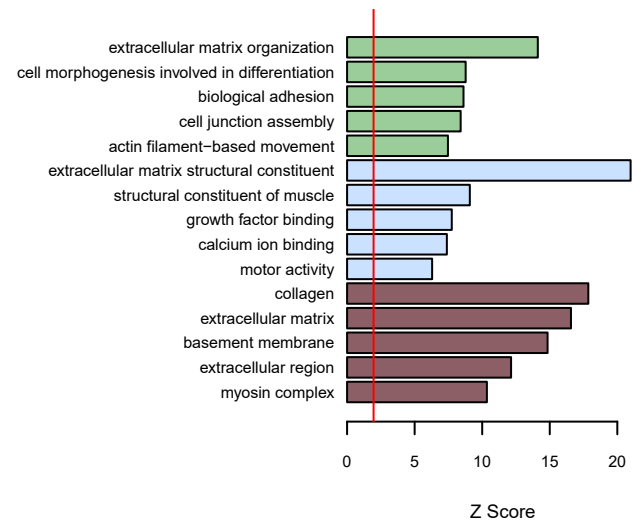

**M6 red**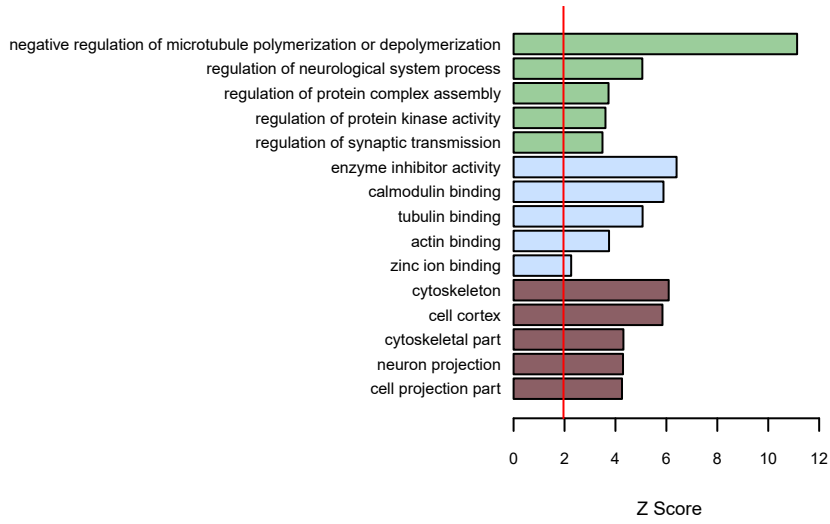**M7 black**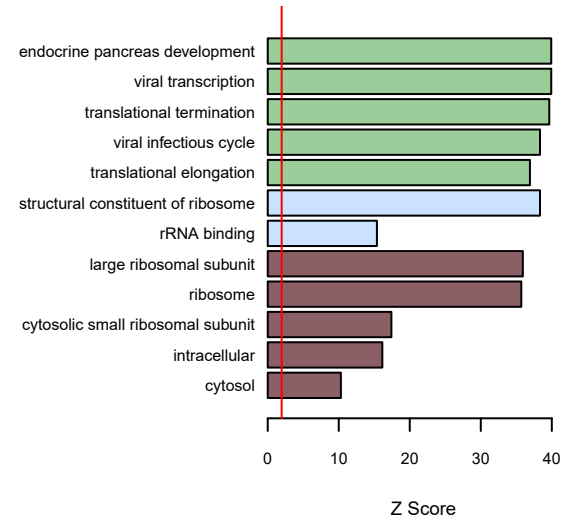**M8 pink**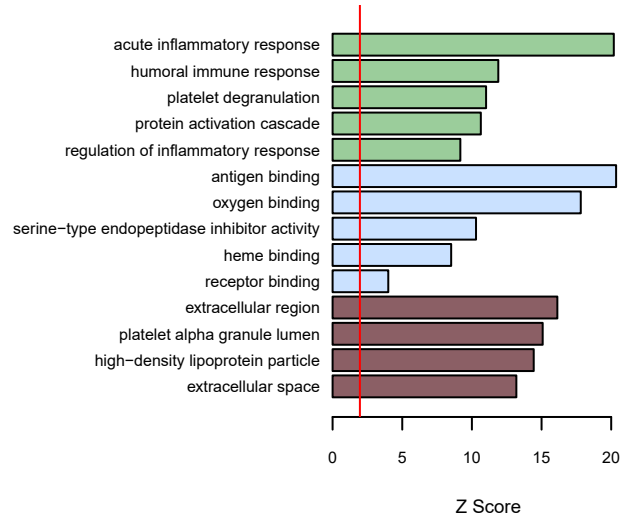**M9 magenta**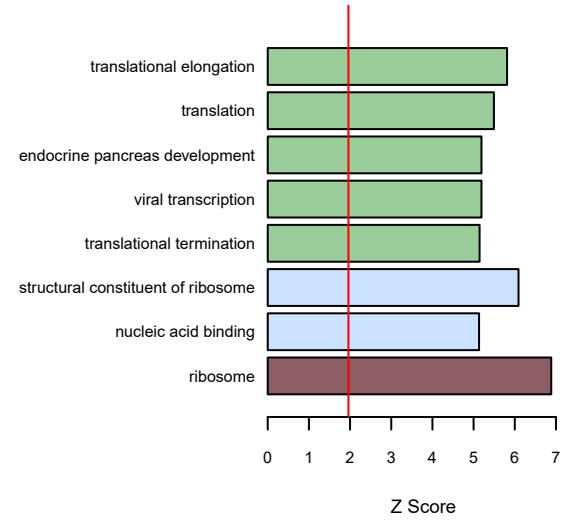**M10 purple**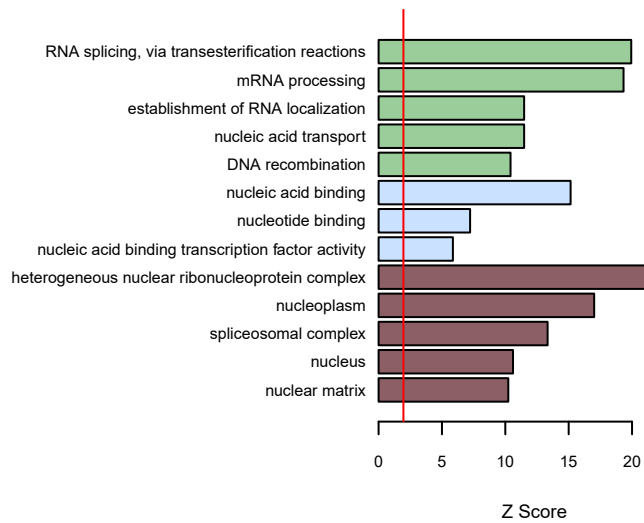**M11 greenyellow**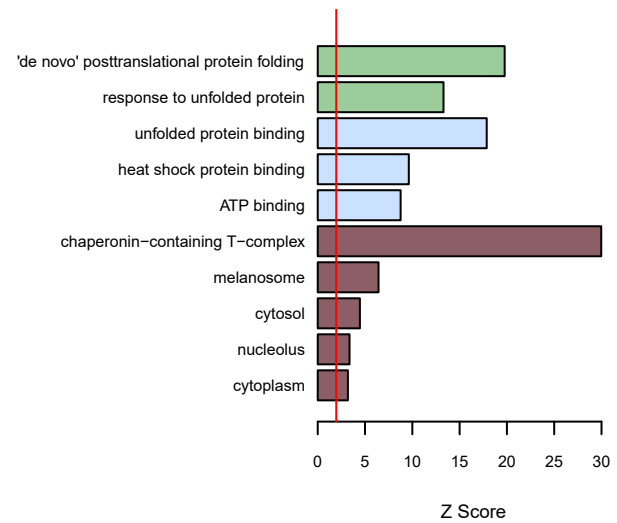



**M12 tan**

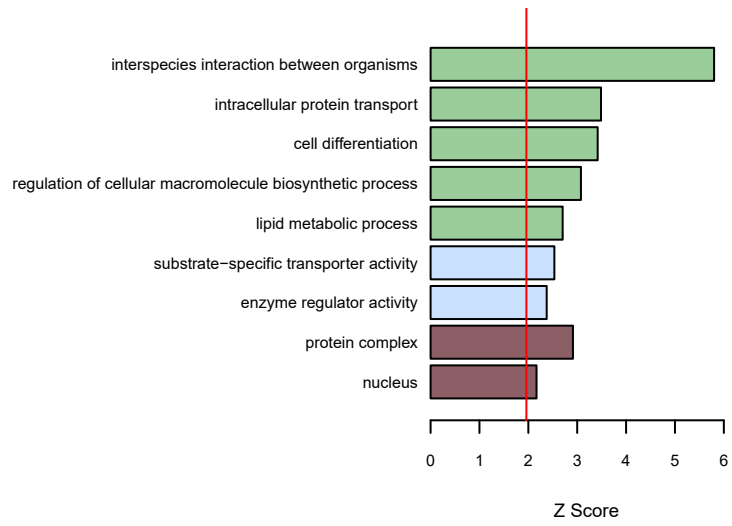

**M13 salmon**

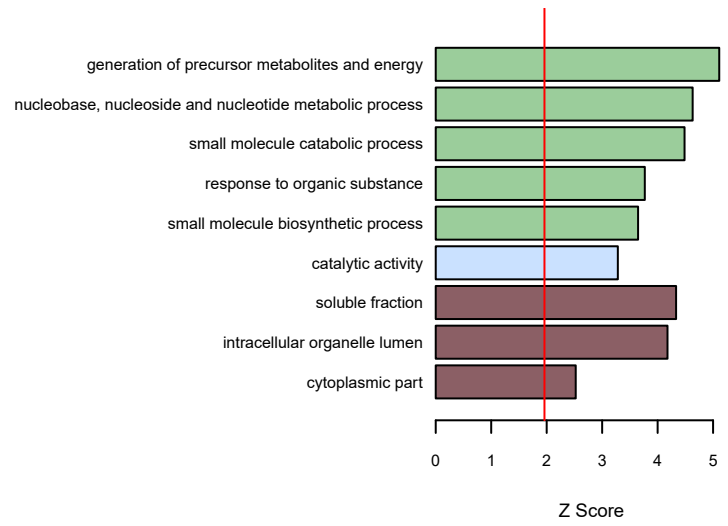

**M5 green.Consensus**

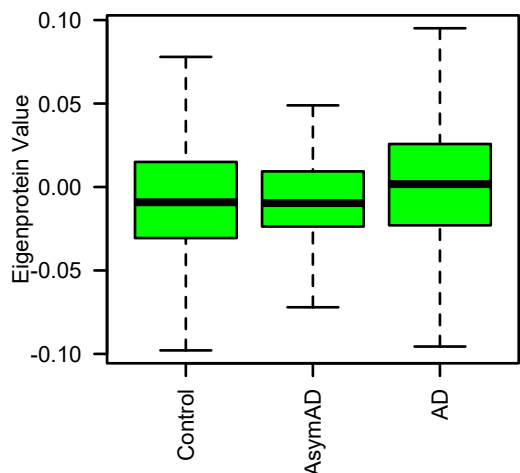

**M5 green.ROSMAP TMT (Synthetic)**  
K-W ANOVA p: 0.74

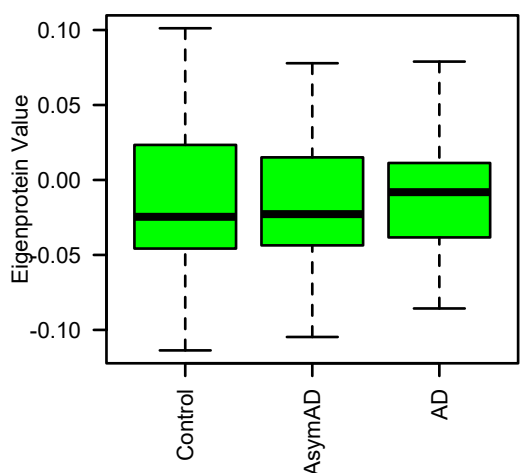

**M5 green**  
ND K-W p = 0.023 | AD K-W p = 0.94

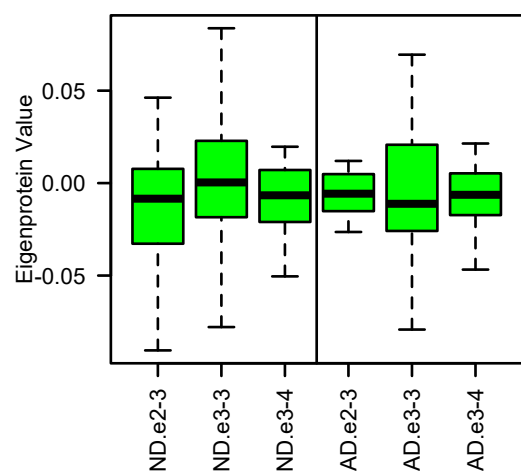

bicor=-0.078, p=0.16  
cor=0.075, p=0.18

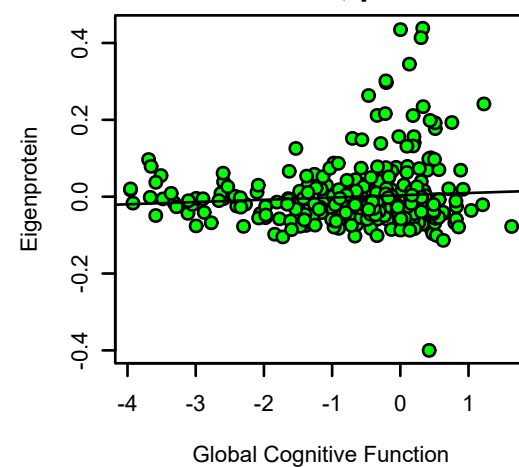

bicor=-0.074, p=0.18  
cor=0.051, p=0.36

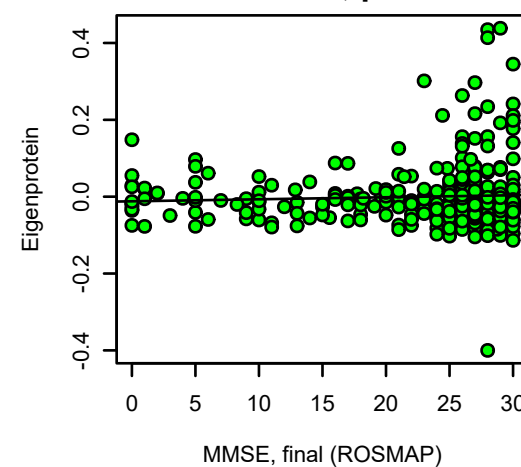

bicor=0.071, p=0.21  
cor=-0.046, p=0.41

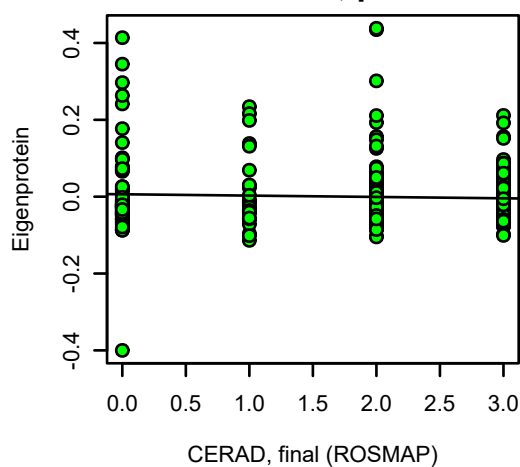

bicor=-0.011, p=0.84  
cor=-0.097, p=0.082

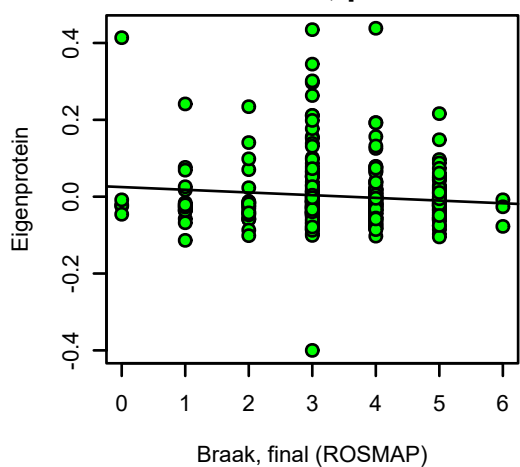

bicor=-0.0011, p=0.98  
cor=-0.05, p=0.37

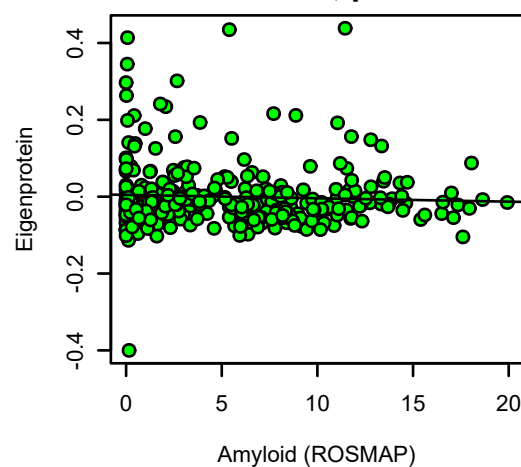

bicor=0.047, p=0.4  
cor=-0.056, p=0.32

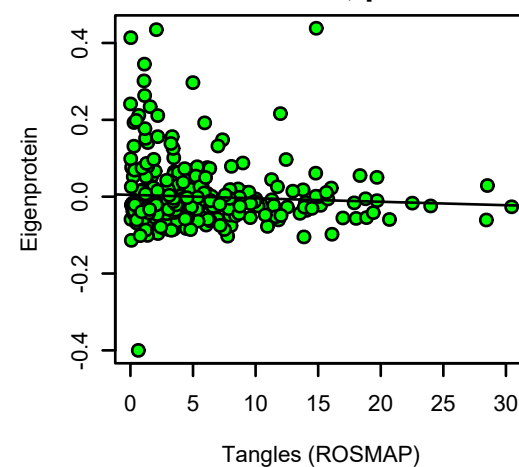

bicor=0.036, p=0.51  
cor=-0.04, p=0.47

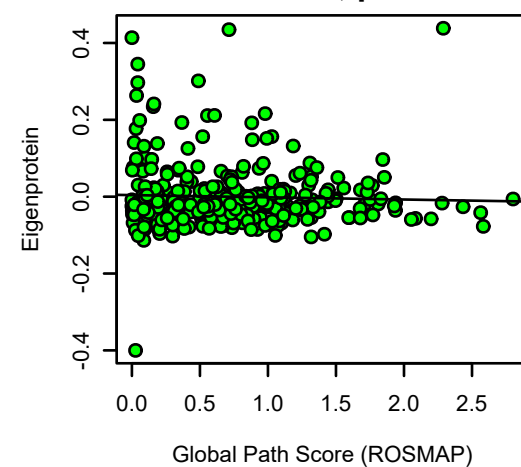

**M8 pink.Consensus**

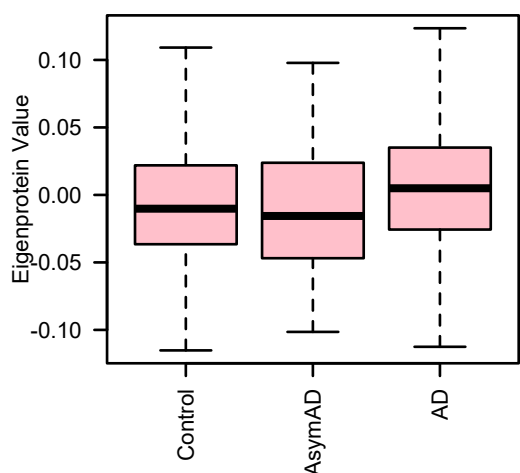

**M8 pink.ROSMAP TMT (Synthetic)**  
K-W ANOVA p: 0.96

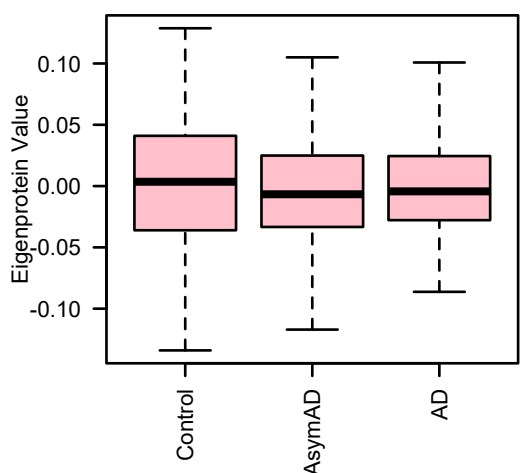

**M8 pink**  
ND K-W p = 0.0024 | AD K-W p = 0.18

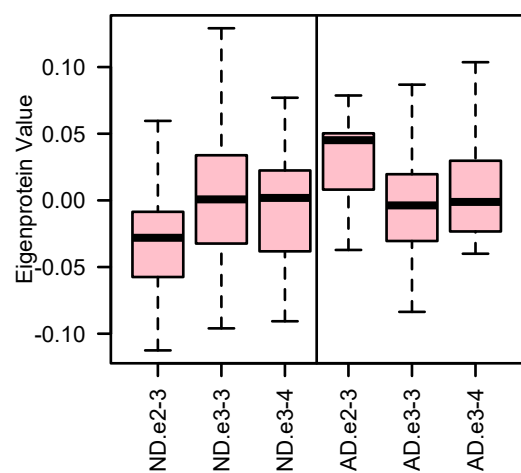

bicor=0.0079, p=0.89  
cor=-0.028, p=0.62

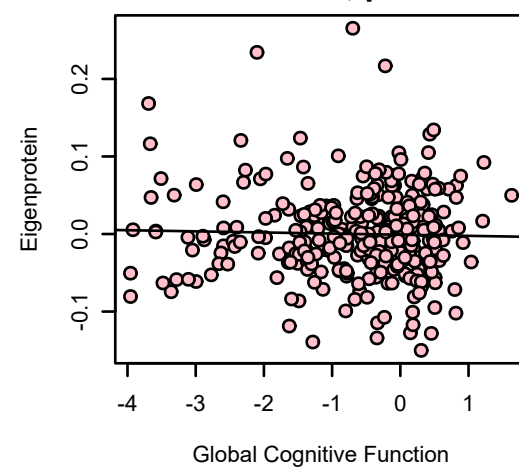

bicor=0.037, p=0.51  
cor=-0.05, p=0.37

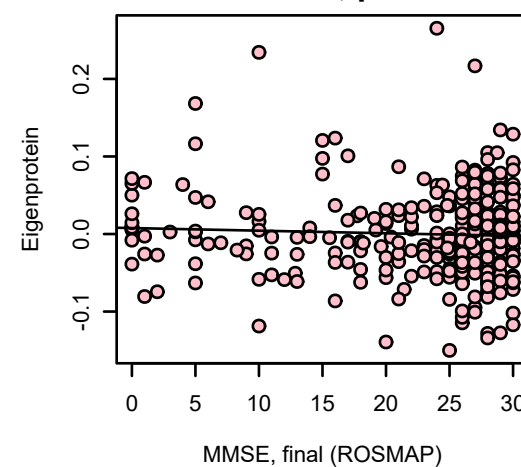

bicor=-0.011, p=0.84  
cor=0.014, p=0.8

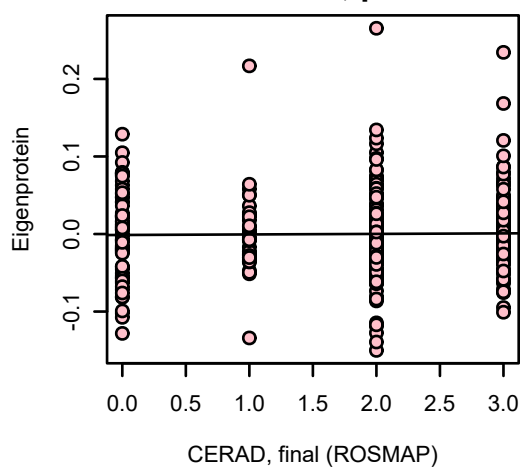

bicor=-0.04, p=0.47  
cor=-0.0034, p=0.95

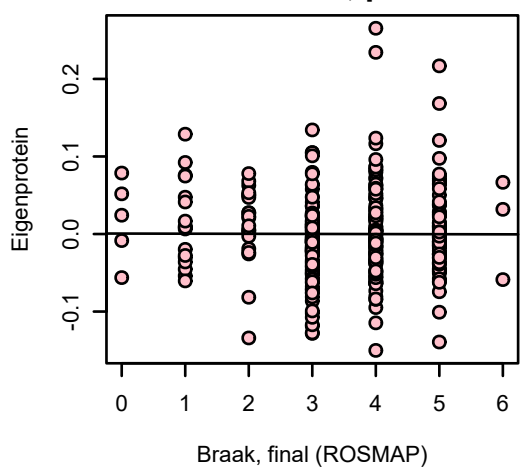

bicor=0.043, p=0.45  
cor=0.048, p=0.39

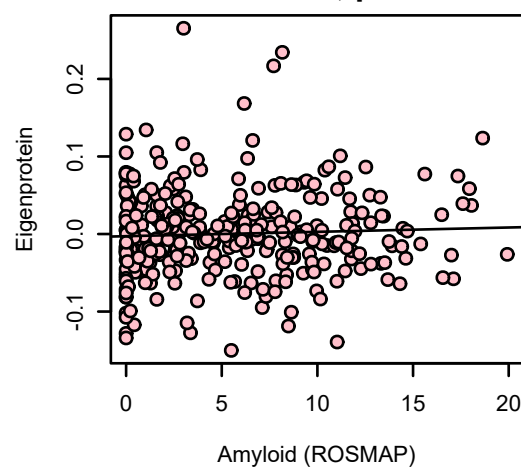

bicor=0.0035, p=0.95  
cor=0.076, p=0.17

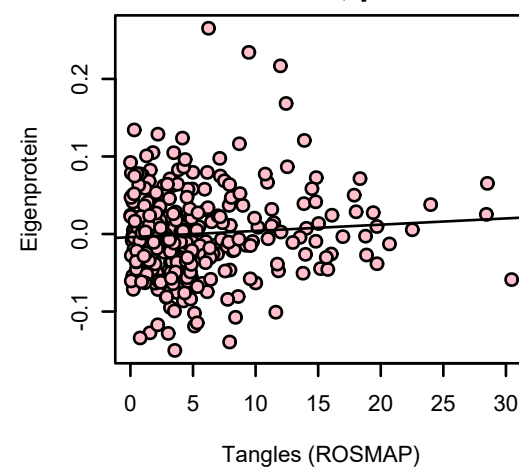

bicor=0.026, p=0.64  
cor=0.054, p=0.33

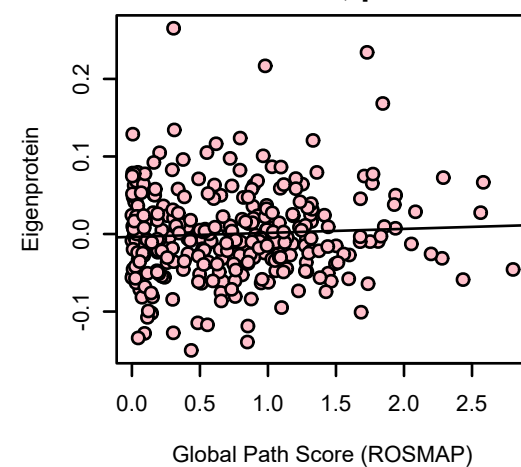

**M10 purple.Consensus**

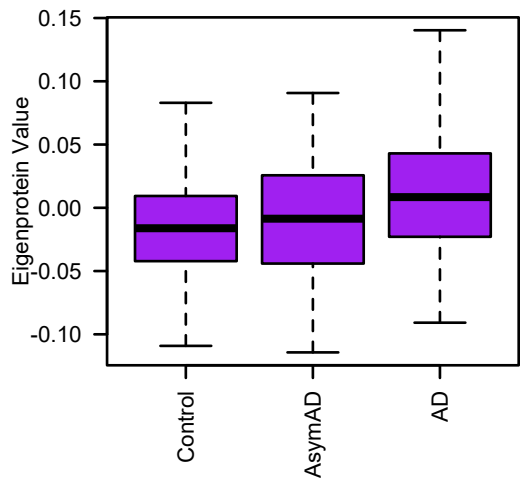

**M10 purple.ROSMAP TMT (Synthetic)**  
K-W ANOVA p: 0.51

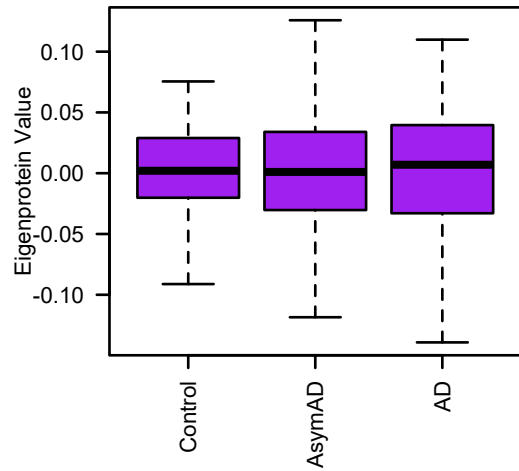

**M10 purple**  
ND K-W p = 0.95 | AD K-W p = 0.37

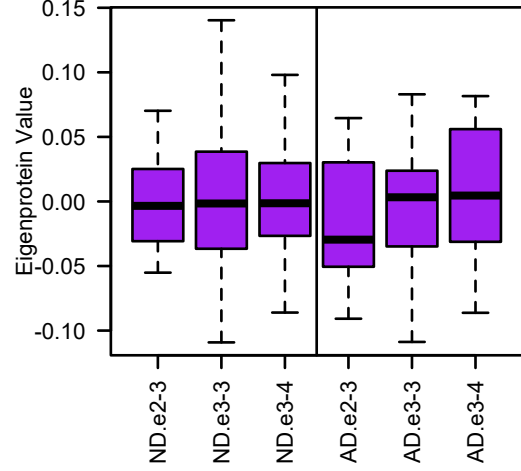

**bicor=-0.11, p=0.046**  
**cor=-0.14, p=0.012**

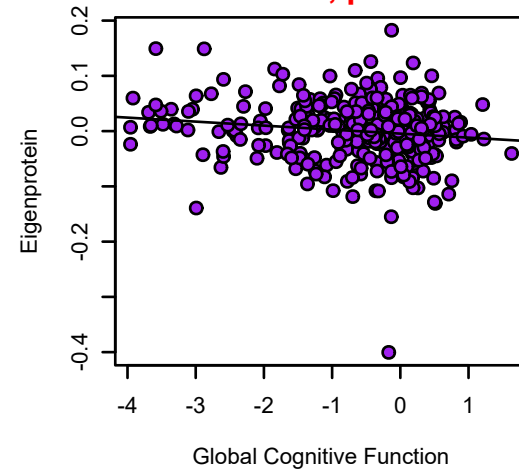

**bicor=-0.037, p=0.51**  
**cor=-0.1, p=0.073**

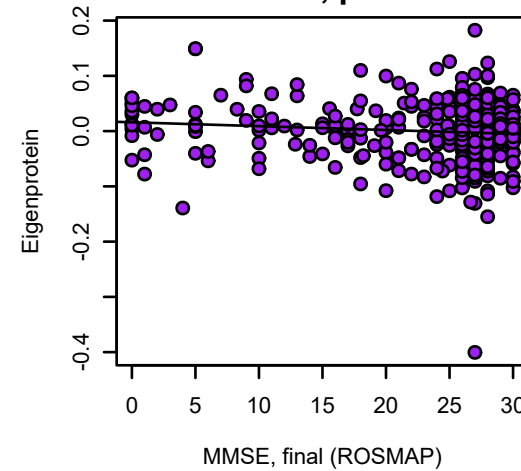

**bicor=0.056, p=0.32**  
**cor=0.048, p=0.39**

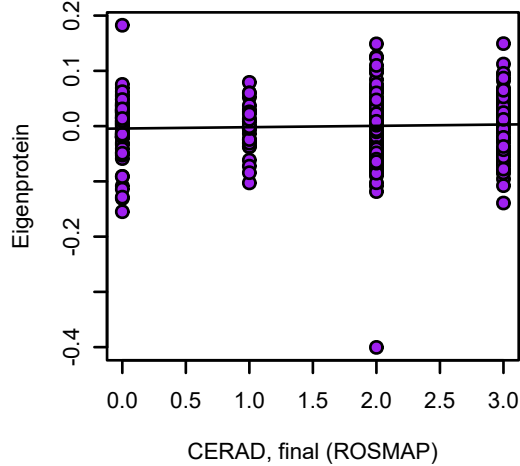

**bicor=0.092, p=0.098**  
**cor=0.057, p=0.31**

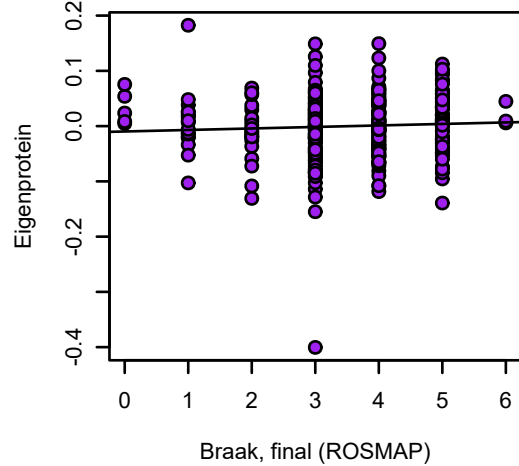

**bicor=0.11, p=0.047**  
**cor=0.14, p=0.012**

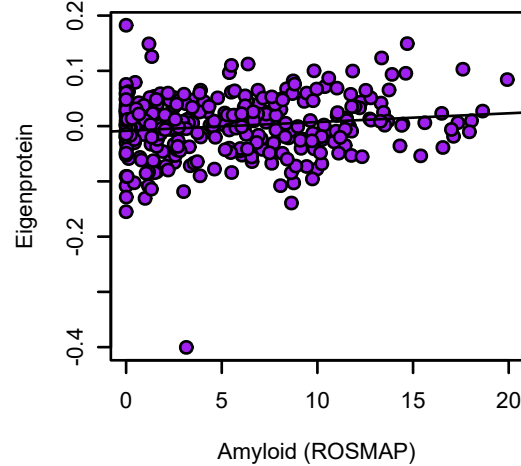

**bicor=0.093, p=0.096**  
**cor=0.099, p=0.076**

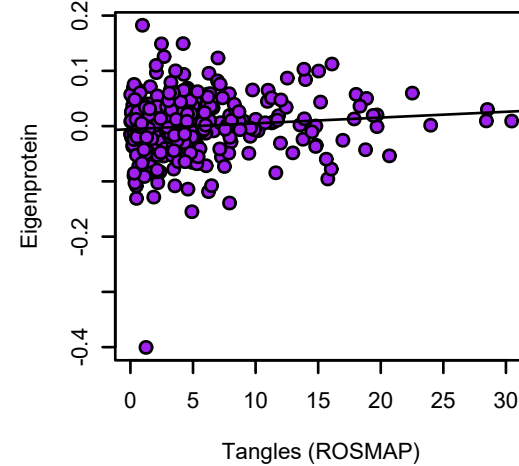

**bicor=0.063, p=0.26**  
**cor=0.071, p=0.2**

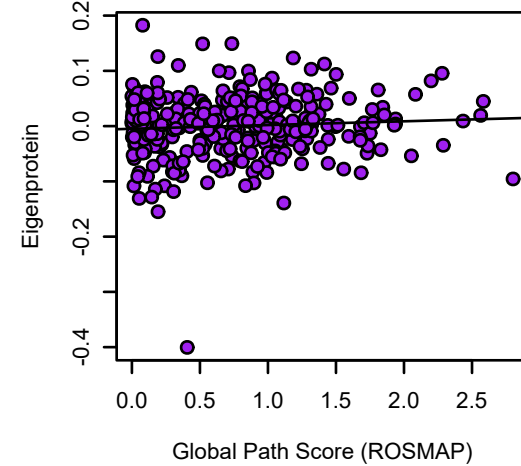

**M2 blue.Consensus**

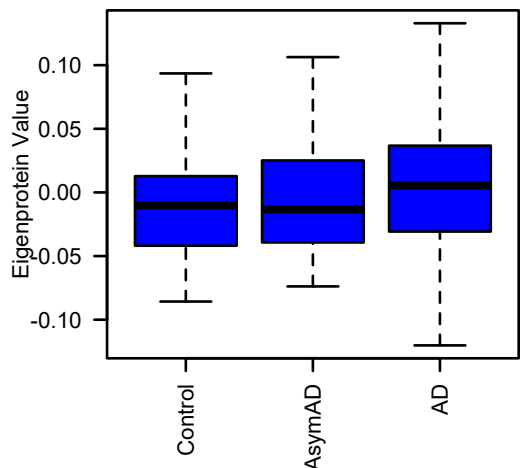

**M2 blue.ROSMAP TMT (Synthetic)**  
K-W ANOVA p: 0.26

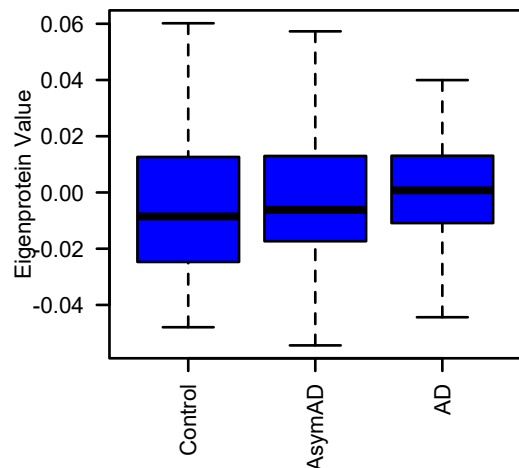

**M2 blue**  
ND K-W p = 0.64 | AD K-W p = 0.17

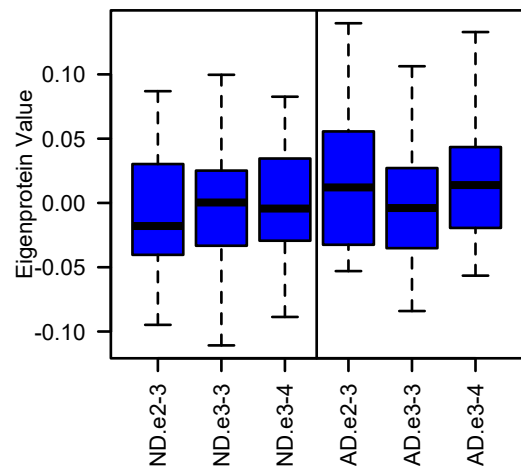

**bicor=-0.13, p=0.016**  
**cor=-0.1, p=0.073**

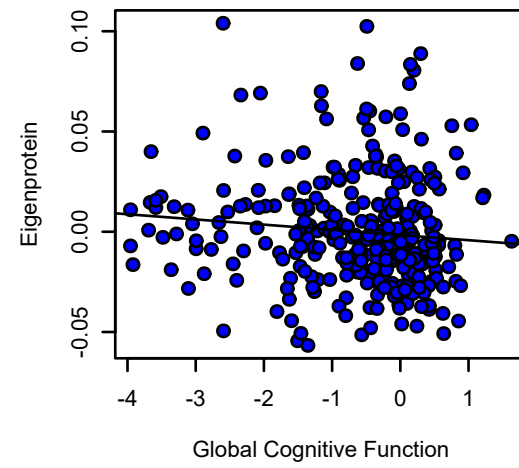

**bicor=-0.085, p=0.13**  
**cor=-0.087, p=0.12**

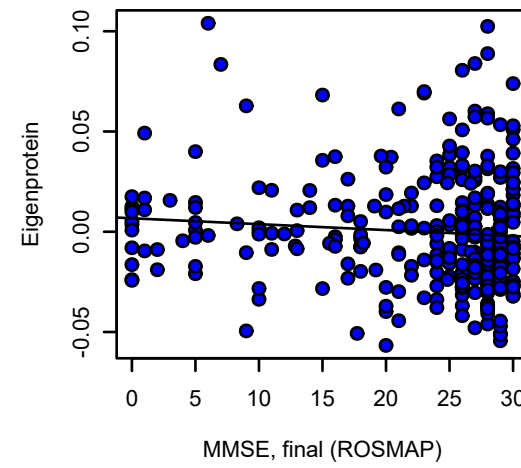

**bicor=0.092, p=0.097**  
**cor=0.1, p=0.073**

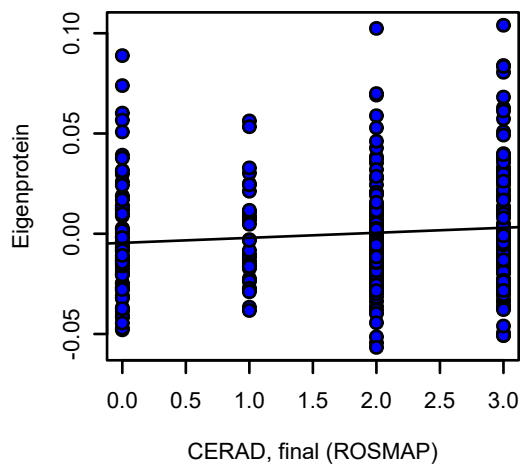

**bicor=0.018, p=0.74**  
**cor=0.049, p=0.38**

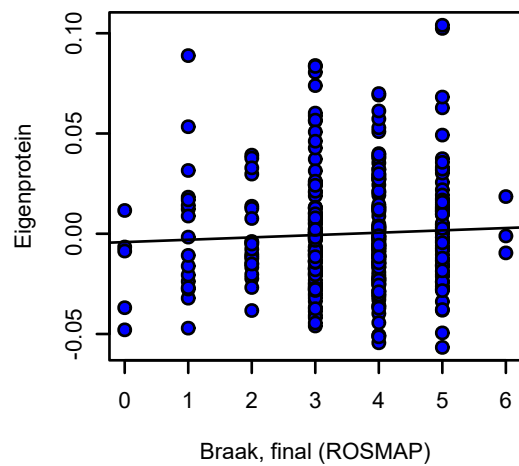

**bicor=-0.031, p=0.58**  
**cor=-0.066, p=0.24**

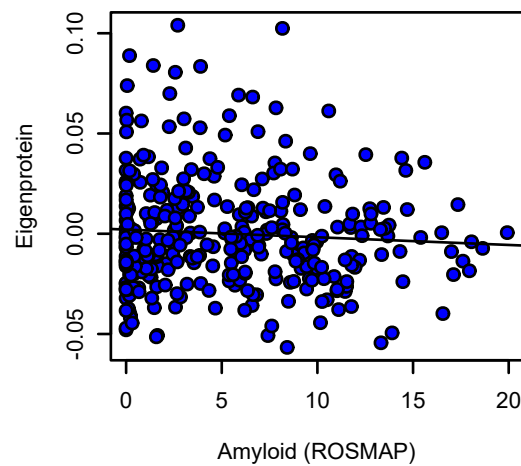

**bicor=0.049, p=0.38**  
**cor=0.12, p=0.031**

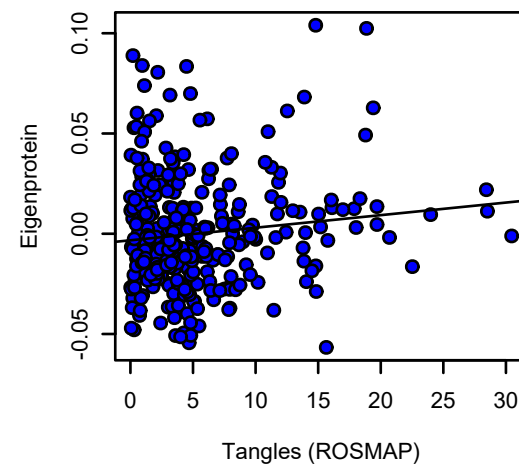

**bicor=0.091, p=0.1**  
**cor=0.091, p=0.1**

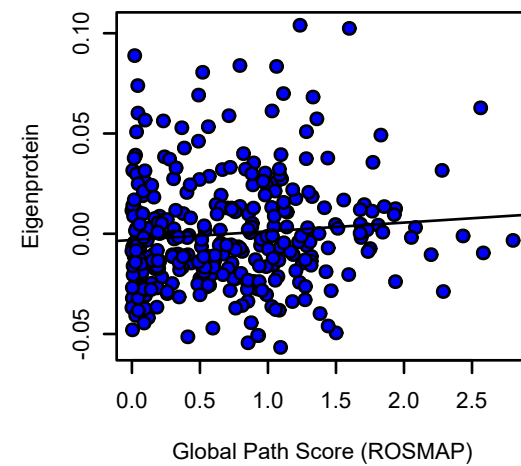



**M4 yellow.Consensus**

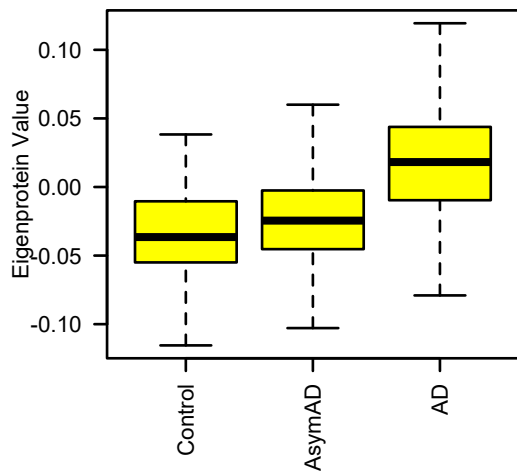

**M4 yellow.ROSMAP TMT (Synthetic)**  
K-W ANOVA p: 7.7e-11

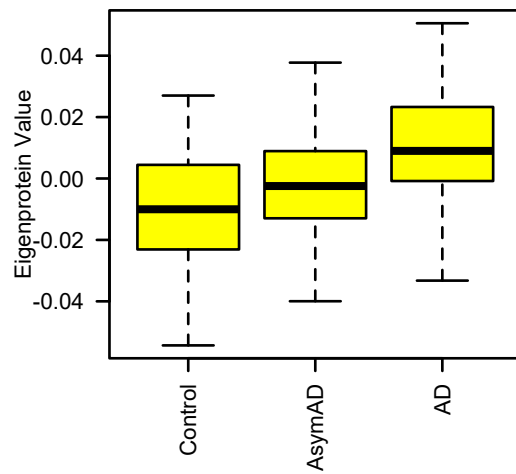

**M4 yellow**  
ND K-W p = 0.09 | AD K-W p = 0.21

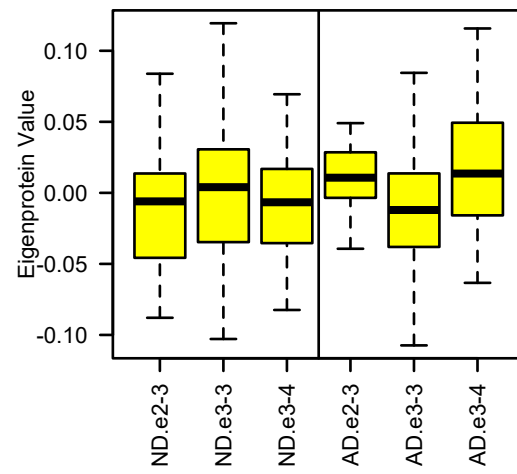

**bicor=-0.36, p=3.2e-11**  
**cor=-0.36, p=2.6e-11**

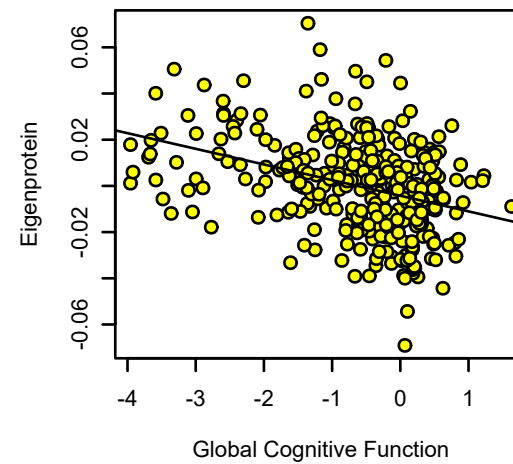

**bicor=-0.26, p=3.2e-06**  
**cor=-0.39, p=3.5e-13**

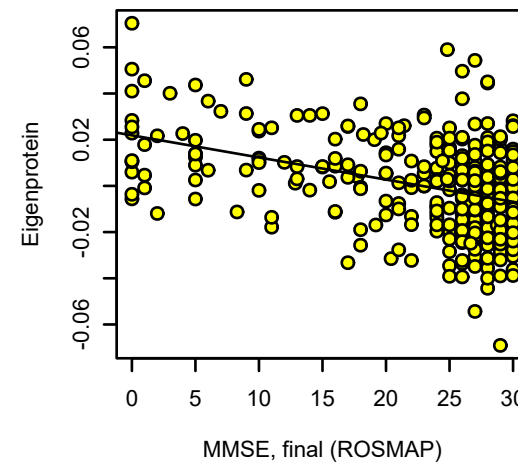

**bicor=0.38, p=9.2e-13**  
**cor=0.38, p=1.6e-12**

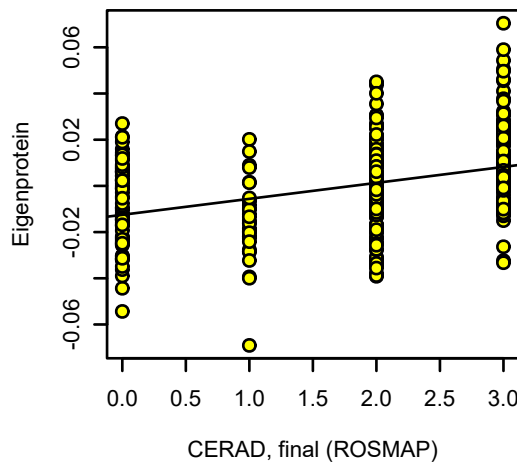

**bicor=0.31, p=1.8e-08**  
**cor=0.29, p=1.1e-07**

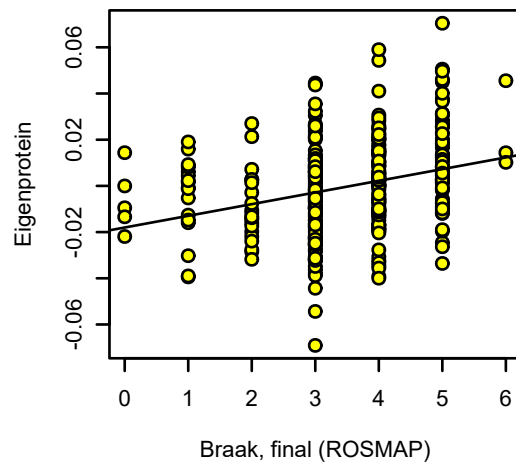

**bicor=0.26, p=3.5e-06**  
**cor=0.25, p=5.6e-06**

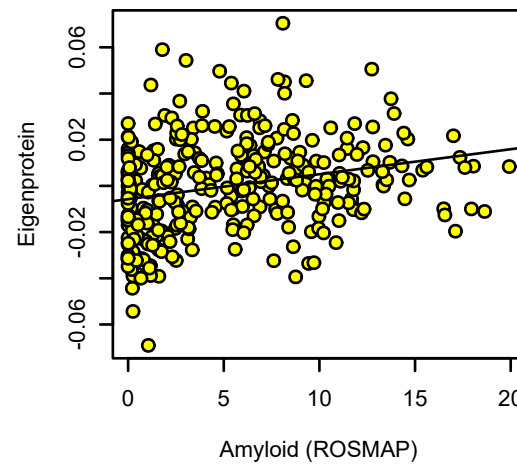

**bicor=0.3, p=4.2e-08**  
**cor=0.37, p=7e-12**

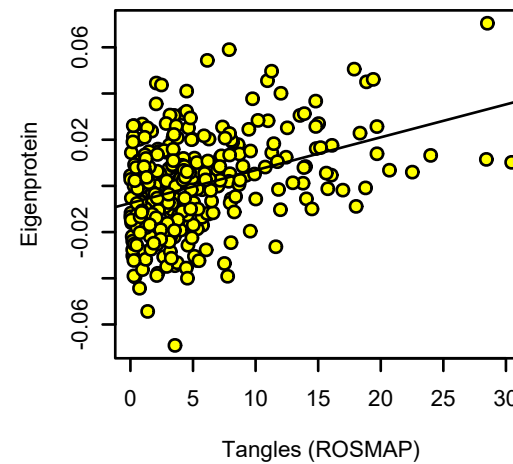

**bicor=0.38, p=8.3e-13**  
**cor=0.39, p=3.5e-13**

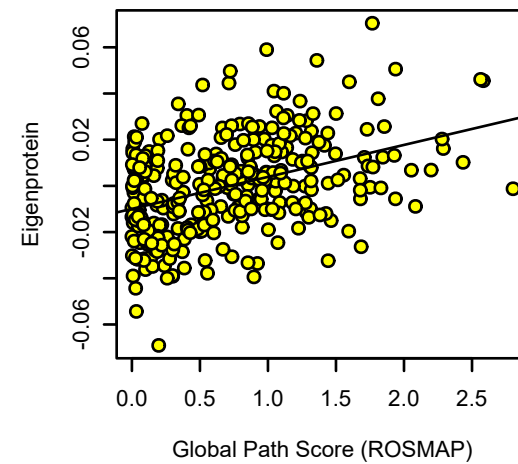

**M11 greenyellow.Consensus**

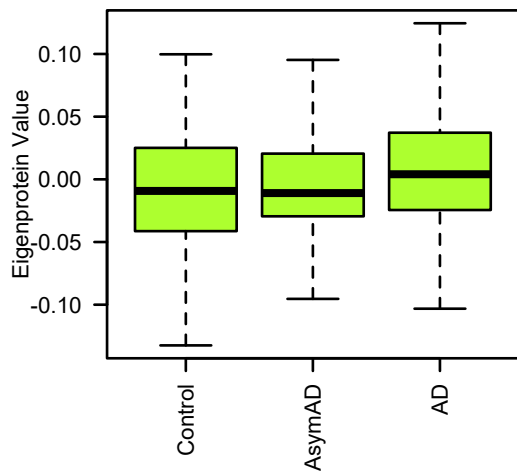

**M11 greenyellow.ROSMAP TMT (Synthetic)**  
K-W ANOVA p: 0.89

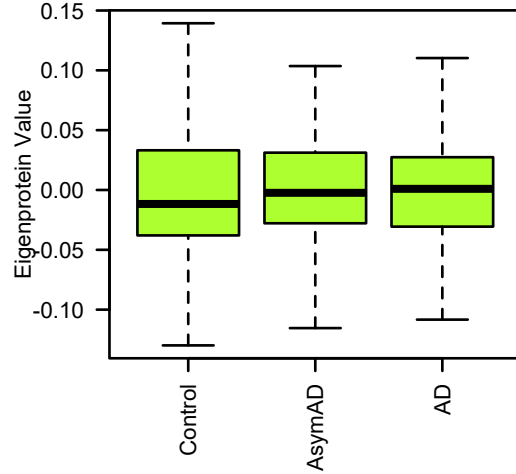

**M11 greenyellow**  
ND K-W p = 0.68 | AD K-W p = 0.61

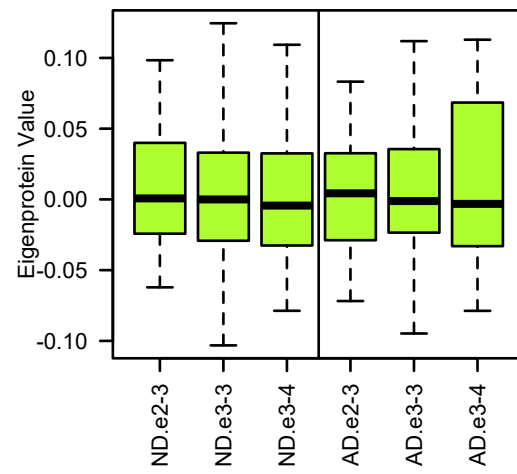

**bicor=-0.036, p=0.52**  
**cor=-0.023, p=0.68**

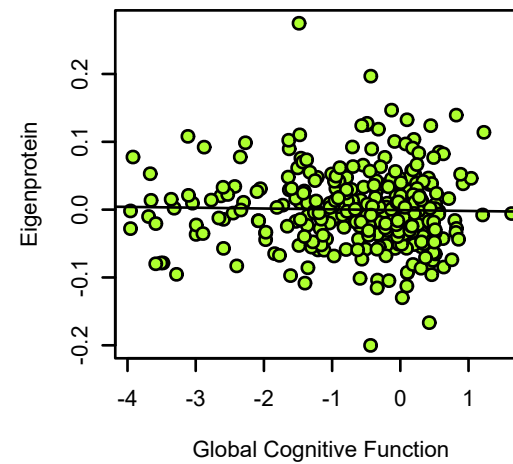

**bicor=0.011, p=0.84**  
**cor=0.025, p=0.65**

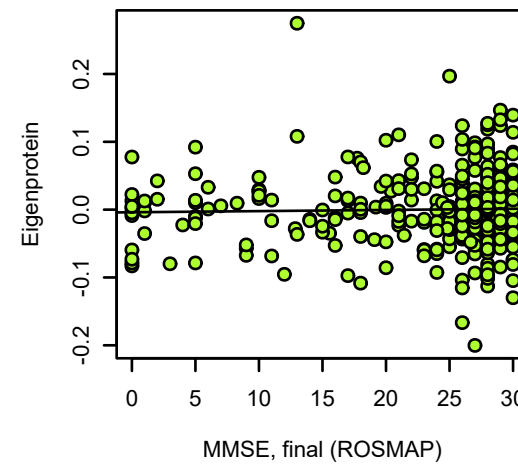

**bicor=0.031, p=0.58**  
**cor=0.033, p=0.55**

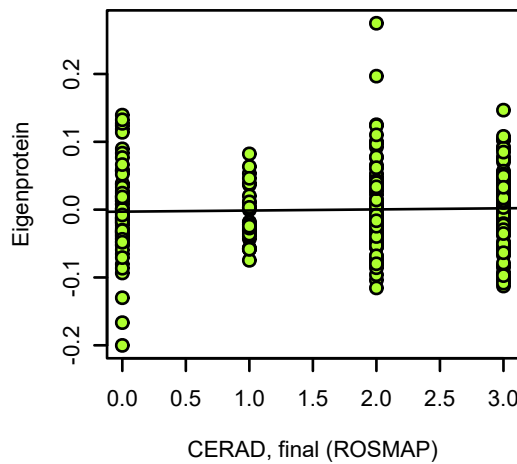

**bicor=-0.047, p=0.4**  
**cor=0.0039, p=0.94**

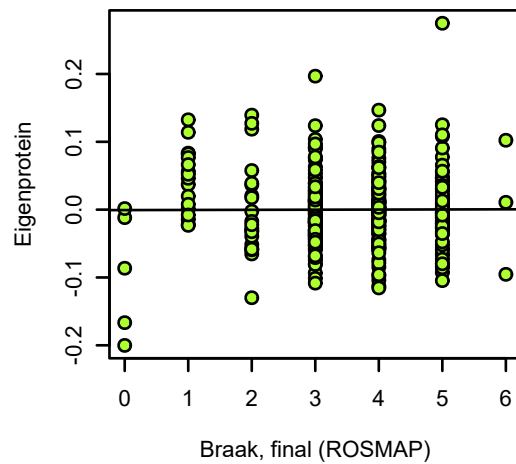

**bicor=0.027, p=0.63**  
**cor=0.061, p=0.28**

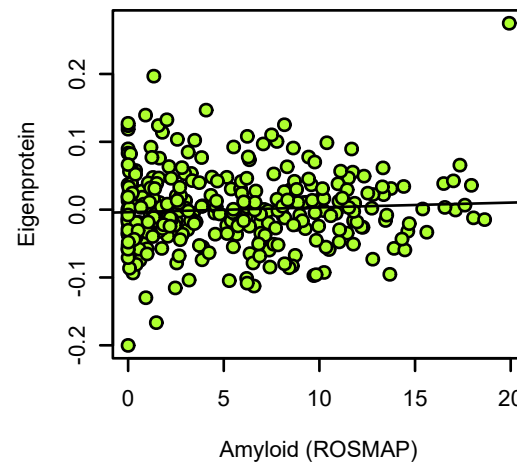

**bicor=0.0072, p=0.9**  
**cor=0.013, p=0.82**

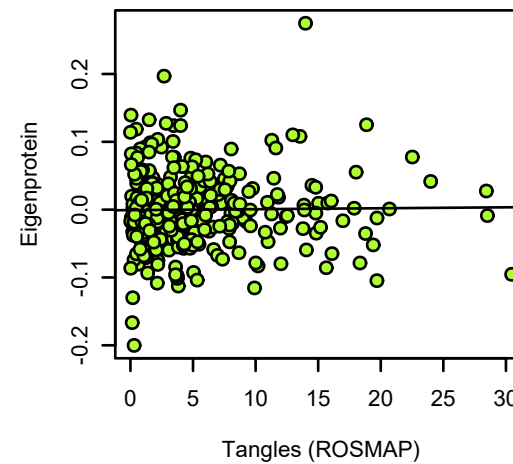

**bicor=0.048, p=0.39**  
**cor=0.029, p=0.6**

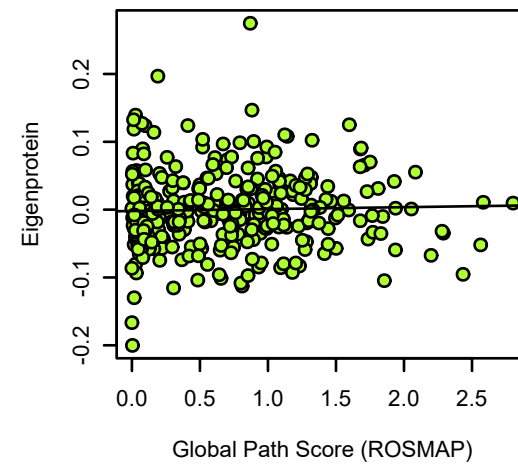

**M3 brown.Consensus**

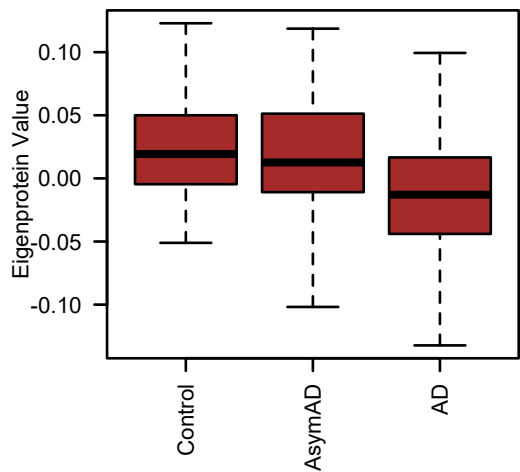

**M3 brown.ROSMAP TMT (Synthetic)**  
K-W ANOVA p: 2e-06

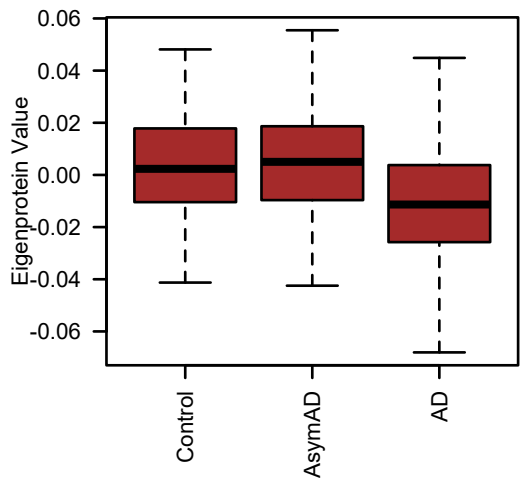

**M3 brown**  
ND K-W p = 0.32 | AD K-W p = 0.27

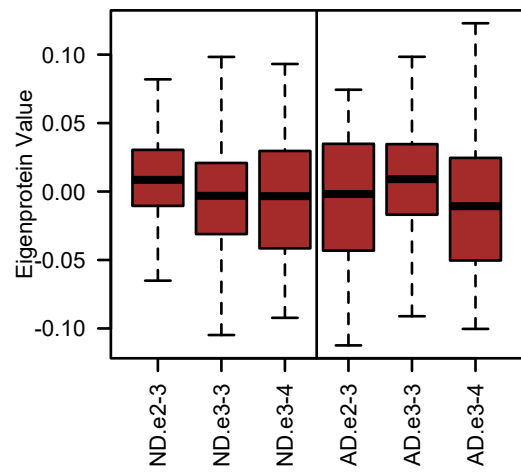

**bicor=0.32, p=4.9e-09**  
**cor=0.31, p=1.3e-08**

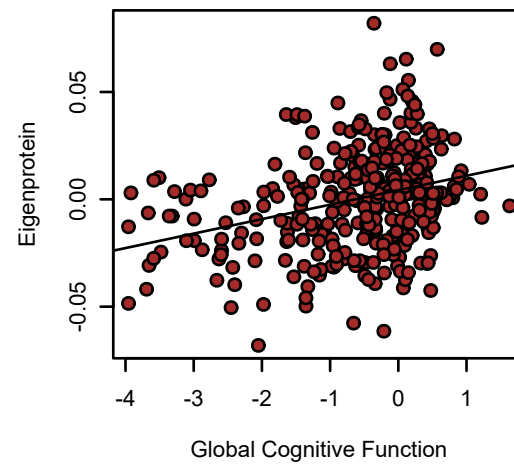

**bicor=0.23, p=3.1e-05**  
**cor=0.29, p=1.1e-07**

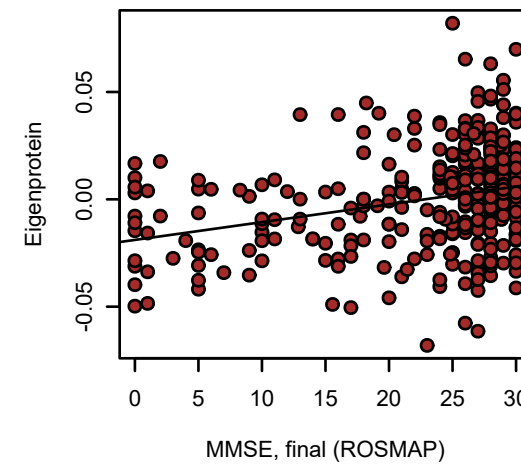

**bicor=-0.14, p=0.012**  
**cor=-0.14, p=0.012**

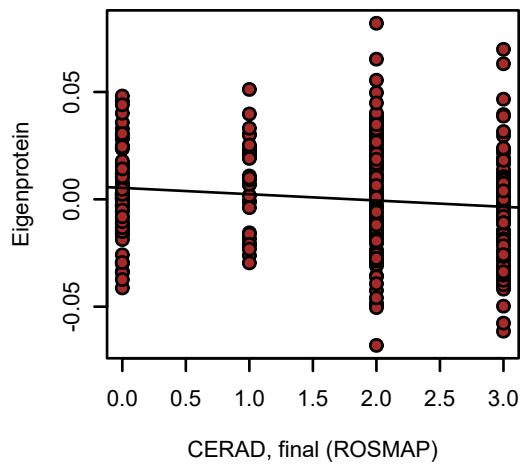

**bicor=-0.14, p=0.013**  
**cor=-0.15, p=0.0069**

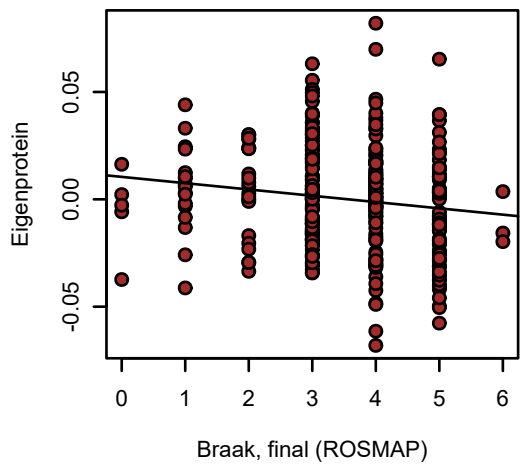

**bicor=-0.088, p=0.11**  
**cor=-0.066, p=0.24**

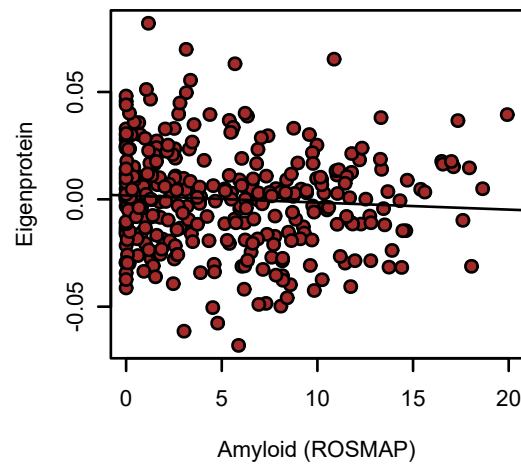

**bicor=-0.24, p=9.6e-06**  
**cor=-0.25, p=5.6e-06**

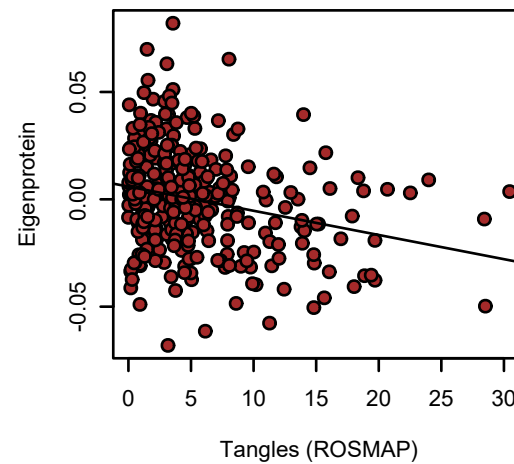

**bicor=-0.2, p=0.00033**  
**cor=-0.19, p=6e-04**

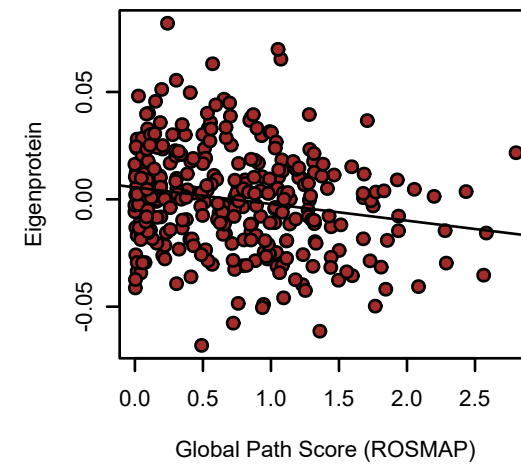

**M6 red.Consensus**

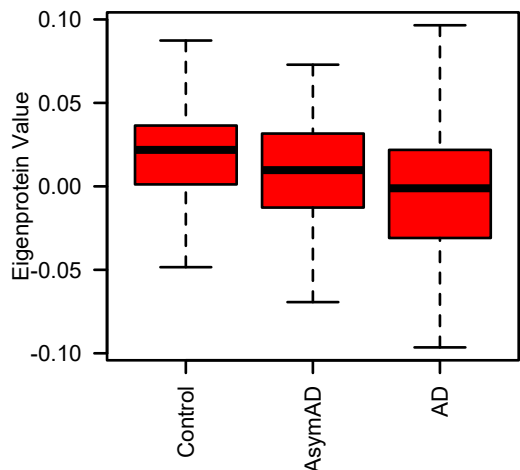

**M6 red.ROSMAP TMT (Synthetic)**  
K-W ANOVA p: 0.19

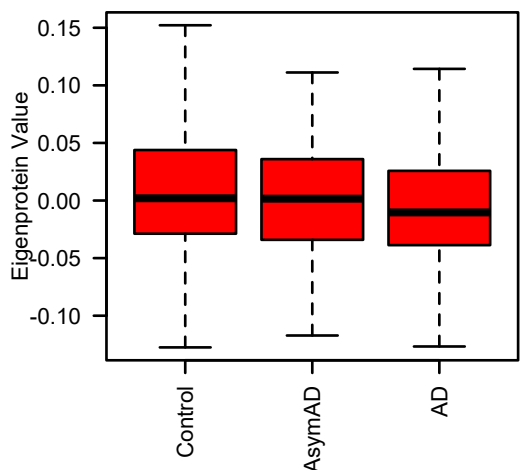

**M6 red**  
ND K-W p = 0.51 | AD K-W p = 0.56

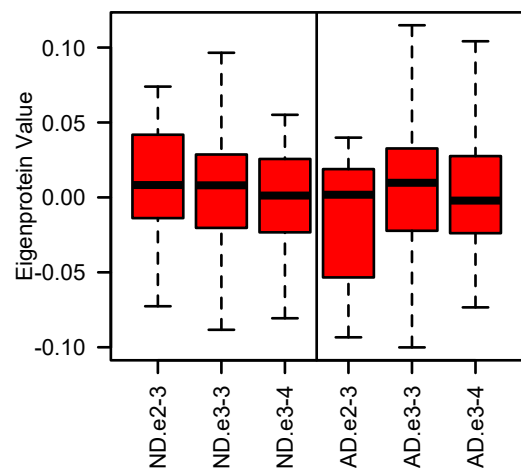

**bicor=0.068, p=0.23**  
**cor=0.086, p=0.12**

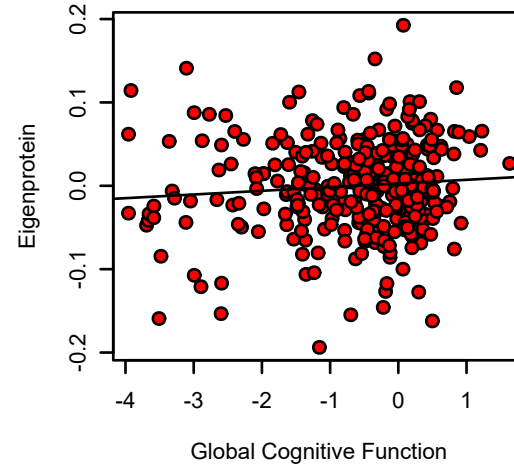

**bicor=0.055, p=0.32**  
**cor=0.12, p=0.031**

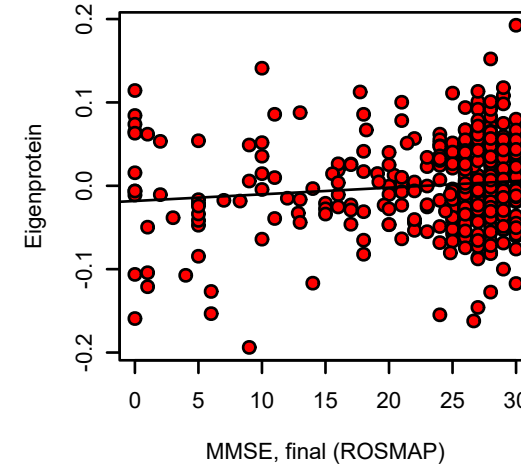

**bicor=-0.14, p=0.013**  
**cor=-0.13, p=0.019**

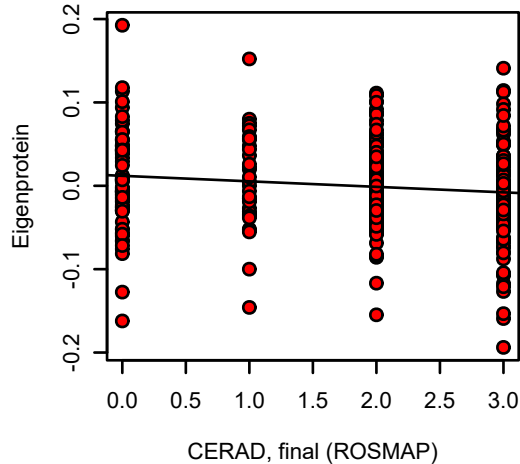

**bicor=-0.16, p=0.0034**  
**cor=-0.17, p=0.0022**

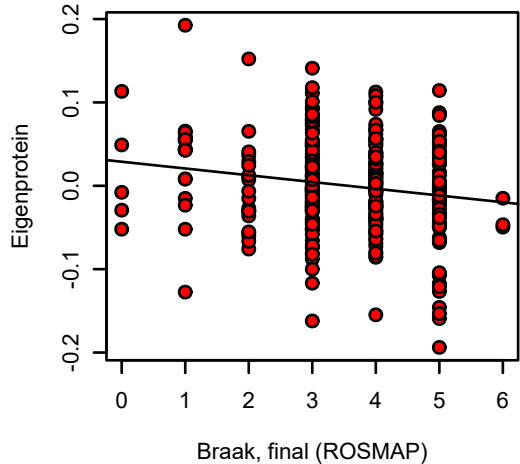

**bicor=-0.042, p=0.46**  
**cor=-0.058, p=0.3**

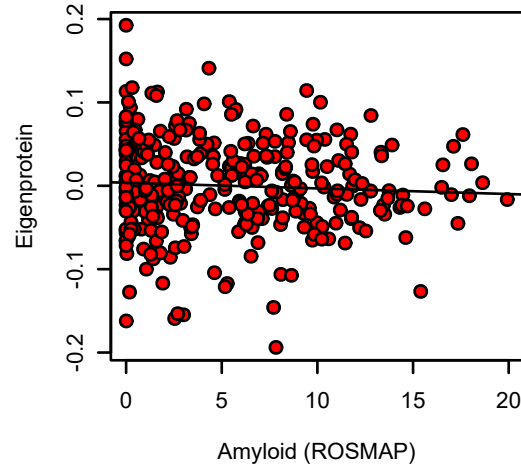

**bicor=-0.13, p=0.022**  
**cor=-0.21, p=0.00015**

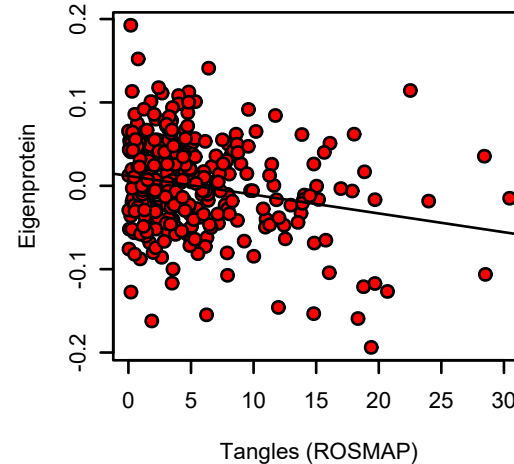

**bicor=-0.17, p=0.0017**  
**cor=-0.21, p=0.00014**

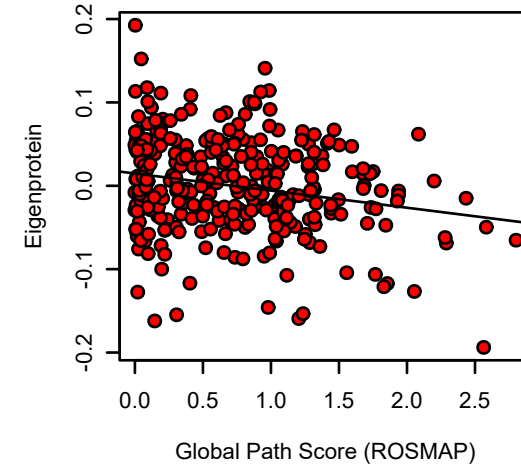

**M1 turquoise.Consensus**

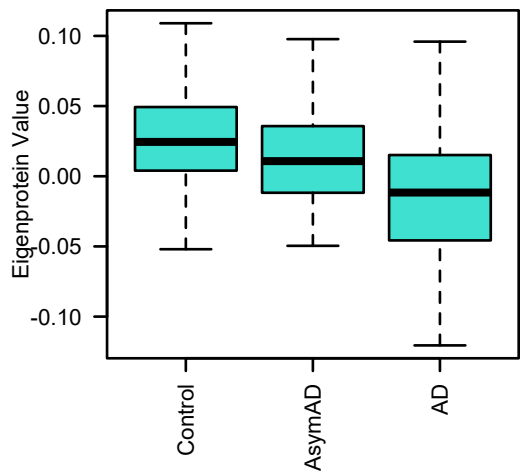

**M1 turquoise.ROSMAP TMT (Synthetic)**  
K-W ANOVA p: 0.0044

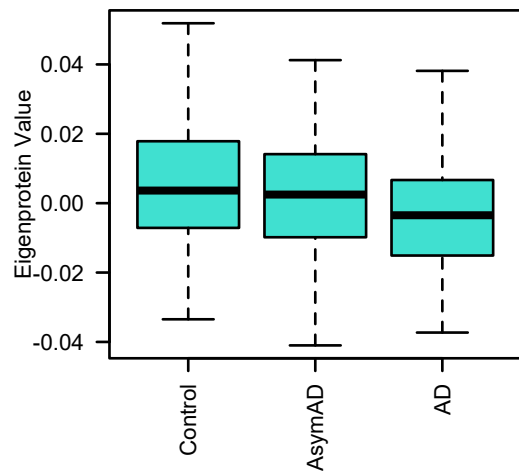

**M1 turquoise**  
ND K-W p = 0.22 | AD K-W p = 0.23

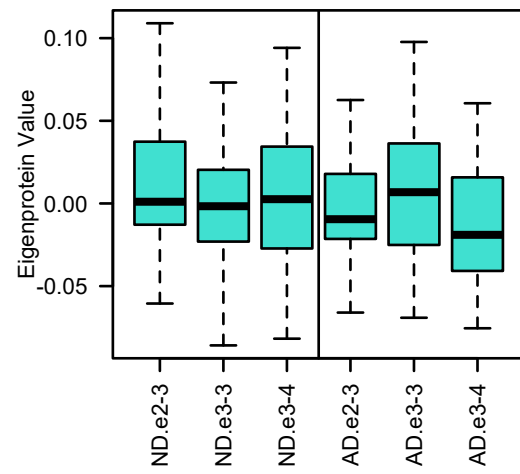

**bicor=0.15, p=0.0062**  
**cor=0.16, p=0.0039**

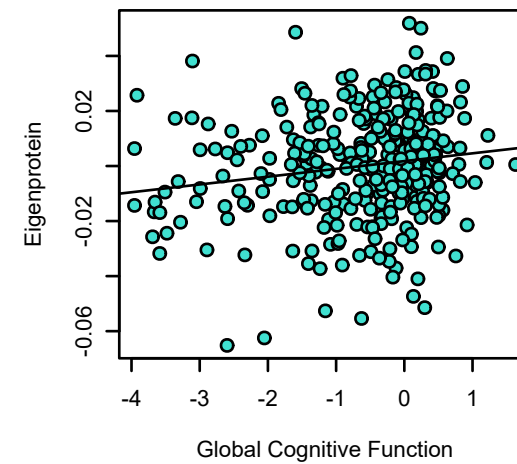

**bicor=0.13, p=0.018**  
**cor=0.18, p=0.0012**

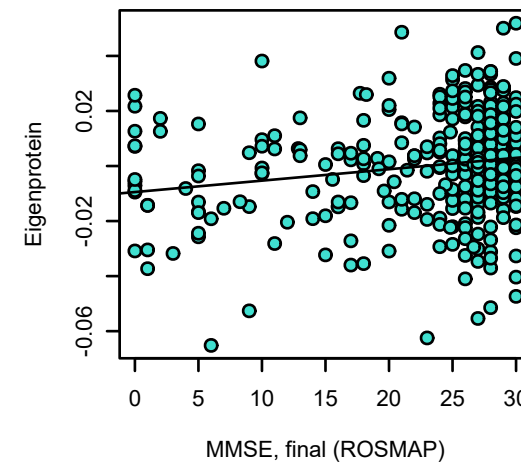

**bicor=-0.15, p=0.0062**  
**cor=-0.16, p=0.0039**

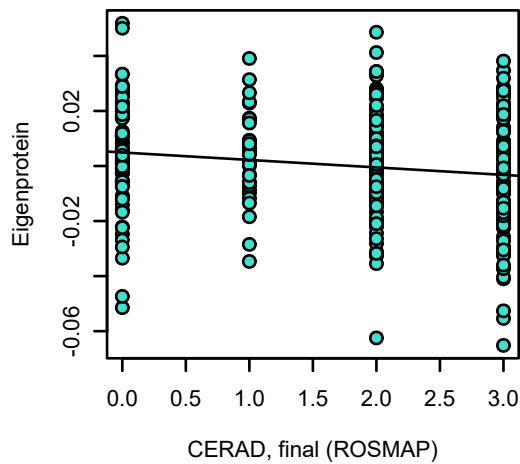

**bicor=-0.15, p=0.0059**  
**cor=-0.18, p=0.0012**

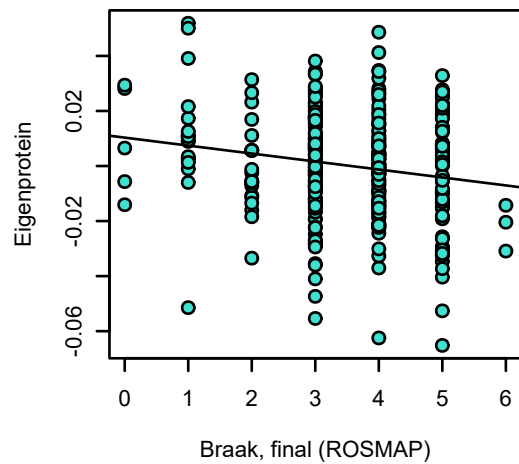

**bicor=-0.01, p=0.86**  
**cor=0.0082, p=0.88**

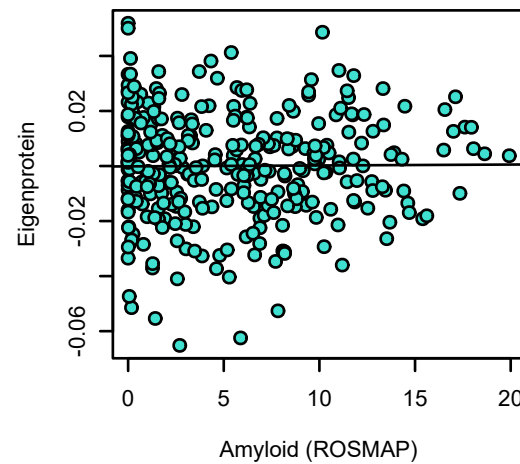

**bicor=-0.091, p=0.1**  
**cor=-0.16, p=0.004**

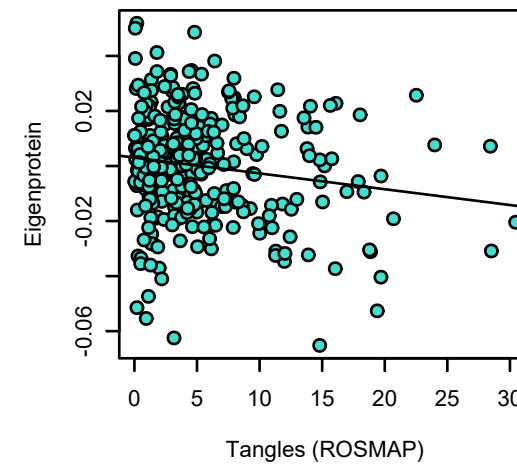

**bicor=-0.14, p=0.015**  
**cor=-0.15, p=0.0069**

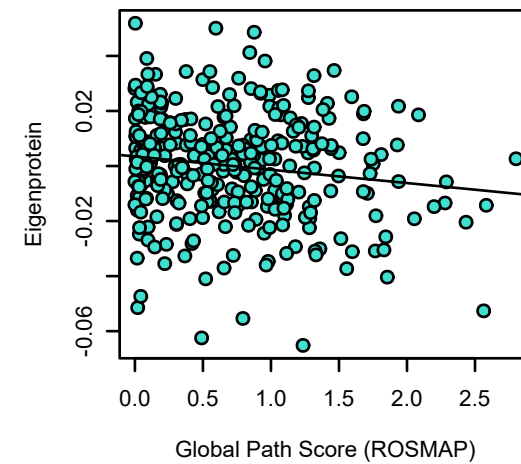

**M12 tan.Consensus**

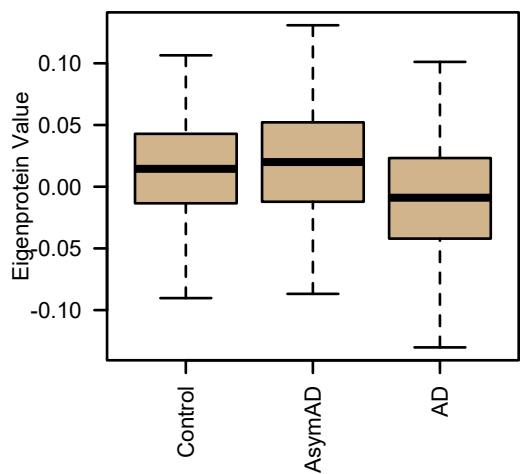

**M12 tan.ROSMAP TMT (Synthetic)**  
K-W ANOVA p: 0.00047

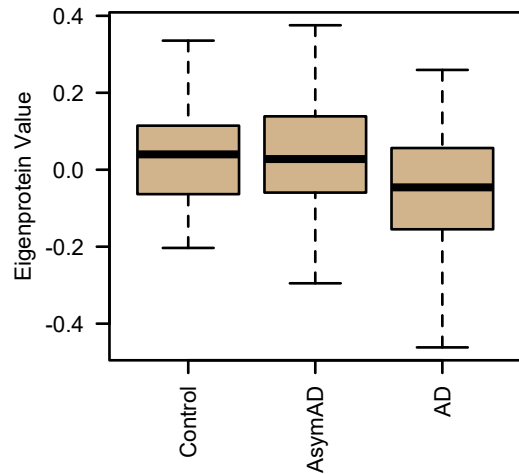

**M12 tan**  
ND K-W p = 0.92 | AD K-W p = 0.14

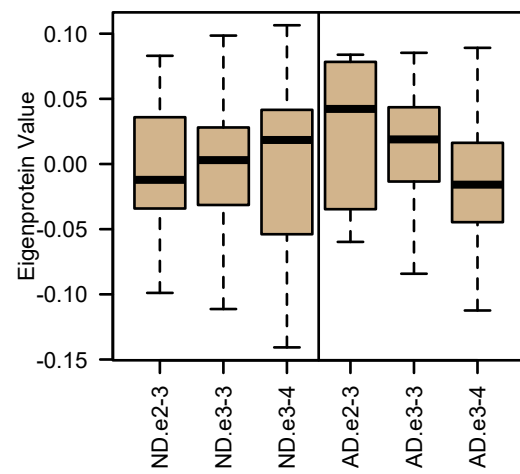

**bicor=0.18, p=0.00087**  
**cor=0.18, p=0.0012**

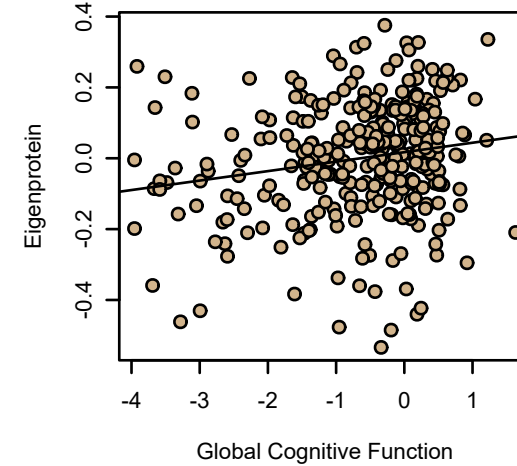

**bicor=0.19, p=0.00045**  
**cor=0.17, p=0.0022**

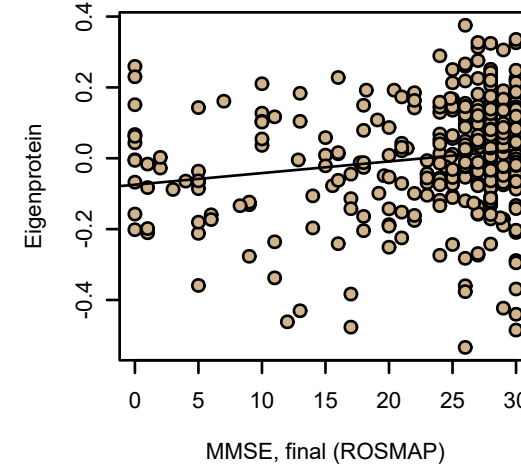

**bicor=-0.14, p=0.014**  
**cor=-0.15, p=0.0069**

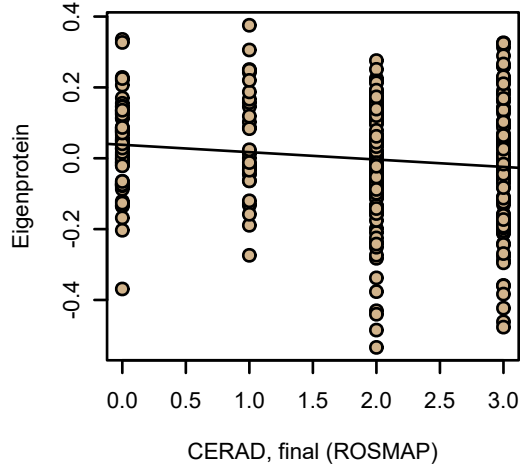

**bicor=-0.17, p=0.002**  
**cor=-0.18, p=0.0012**

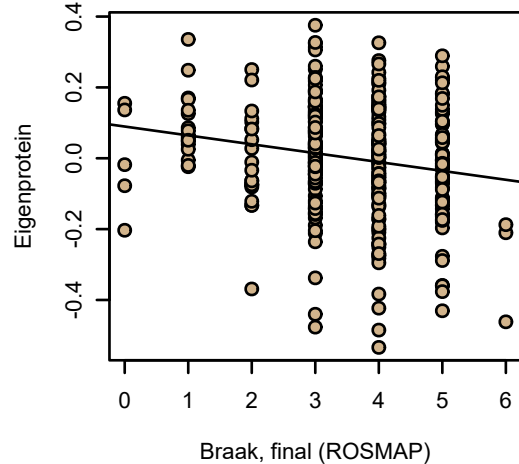

**bicor=-0.13, p=0.019**  
**cor=-0.12, p=0.031**

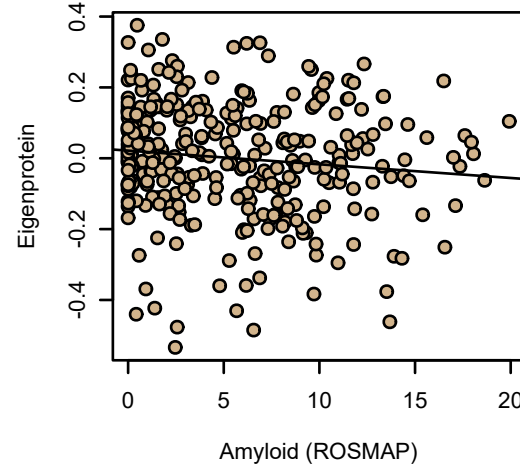

**bicor=-0.13, p=0.019**  
**cor=-0.14, p=0.012**

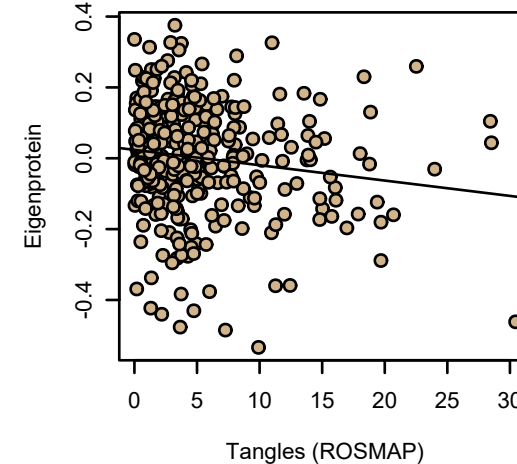

**bicor=-0.15, p=0.0056**  
**cor=-0.16, p=0.0039**

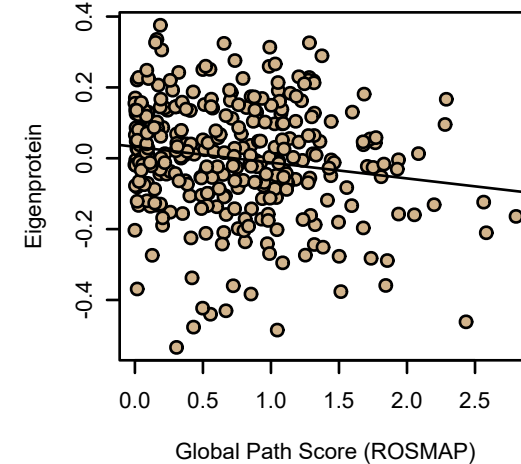



**M7 black.Consensus**

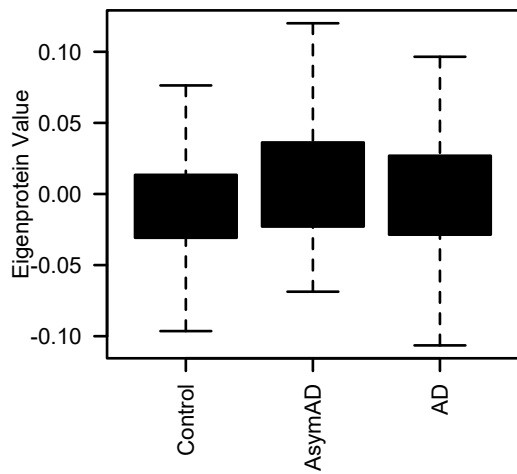

**M7 black.ROSMAP TMT (Synthetic)**  
K-W ANOVA p: 1.5e-05

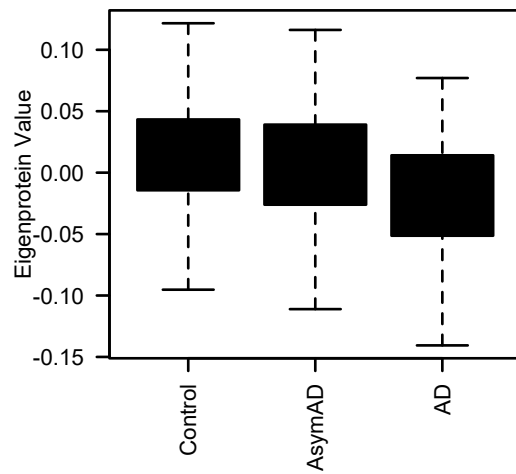

**M7 black**  
ND K-W p = 0.58 | AD K-W p = 0.96

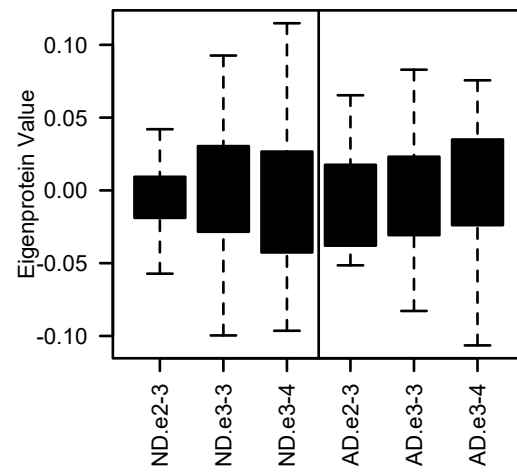

**bicor=0.25, p=3.7e-06**  
**cor=0.21, p=0.00014**

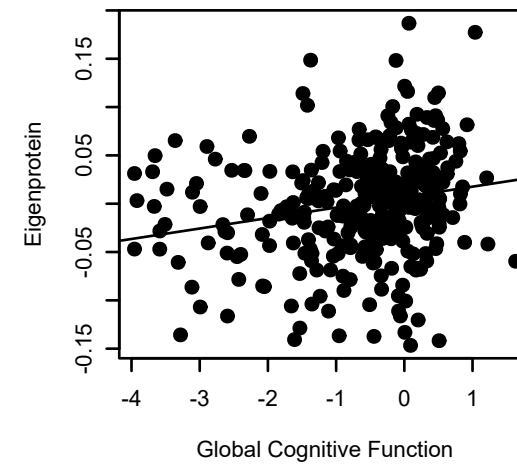

**bicor=0.27, p=1.3e-06**  
**cor=0.22, p=6.7e-05**

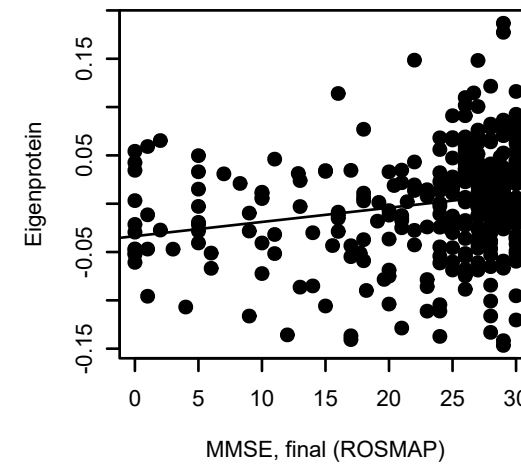

**bicor=-0.14, p=0.013**  
**cor=-0.15, p=0.0069**

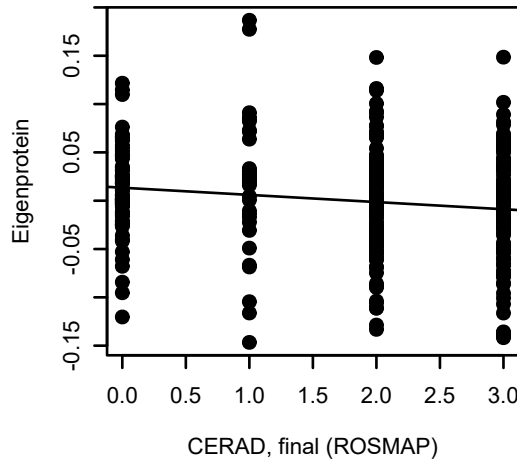

**bicor=-0.15, p=0.0087**  
**cor=-0.17, p=0.0022**

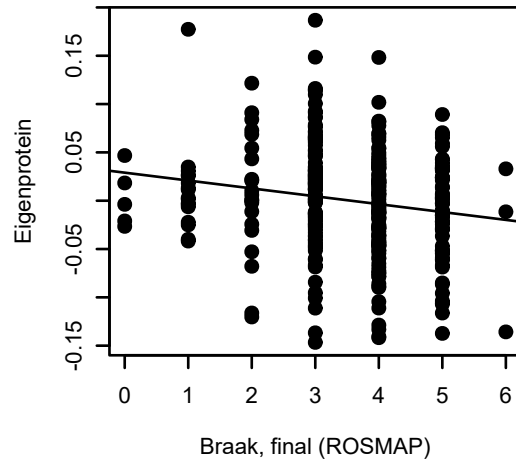

**bicor=-0.16, p=0.0044**  
**cor=-0.14, p=0.012**

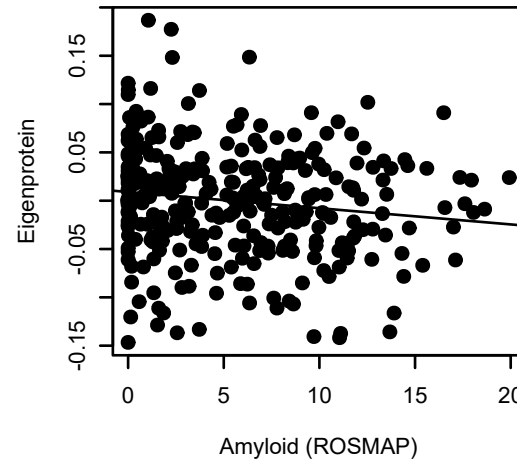

**bicor=-0.2, p=0.00028**  
**cor=-0.19, p=0.00061**

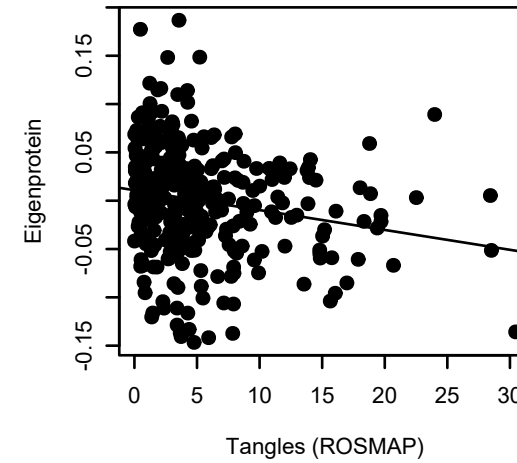

**bicor=-0.16, p=0.0031**  
**cor=-0.16, p=0.0039**

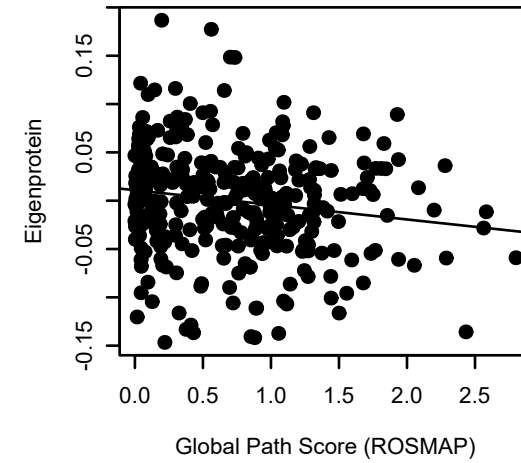

**M9 magenta.Consensus**

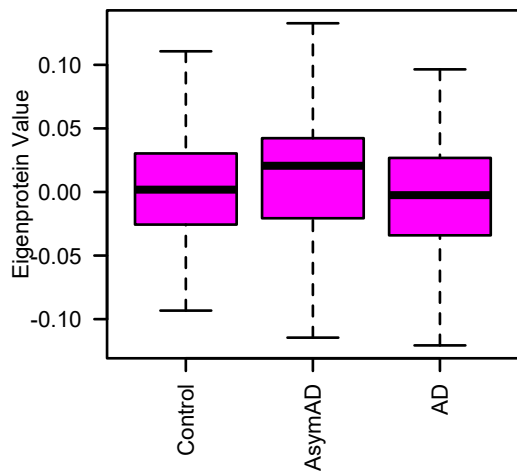

**M9 magenta.ROSMAP TMT (Synthetic)**  
K-W ANOVA p: 0.0073

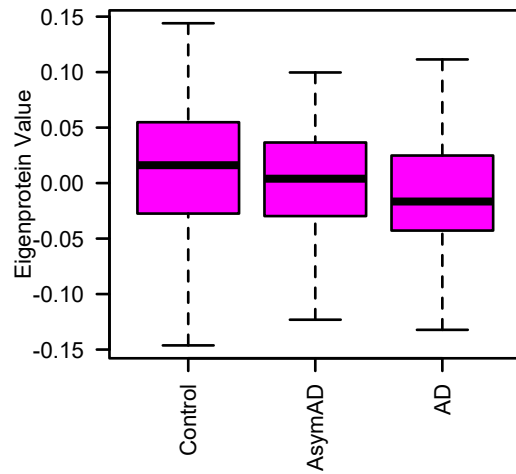

**M9 magenta**  
ND K-W p = 0.74 | AD K-W p = 0.96

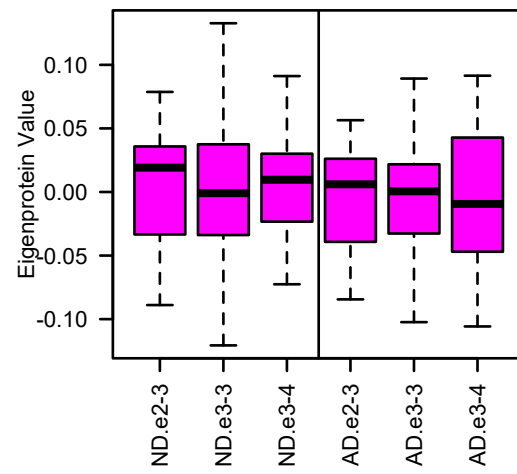

**bicor=0.15, p=0.0075**  
**cor=0.12, p=0.031**

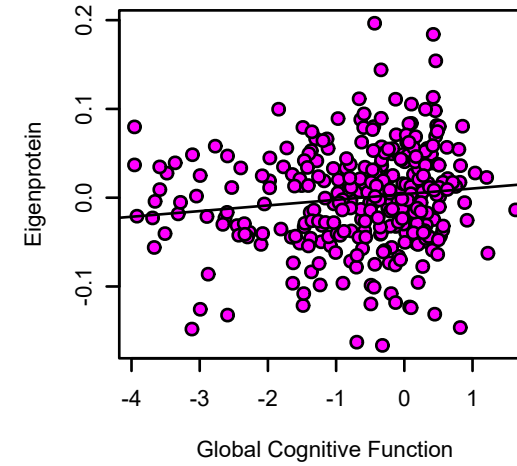

**bicor=0.13, p=0.025**  
**cor=0.13, p=0.019**

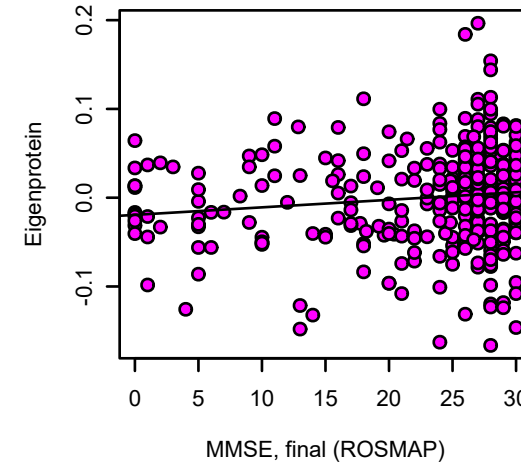

**bicor=-0.13, p=0.019**  
**cor=-0.13, p=0.019**

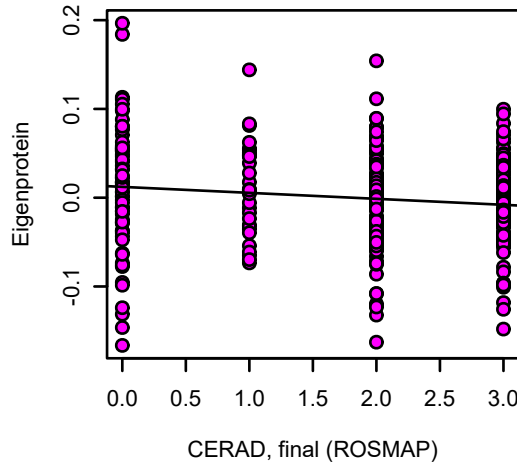

**bicor=-0.09, p=0.11**  
**cor=-0.13, p=0.019**

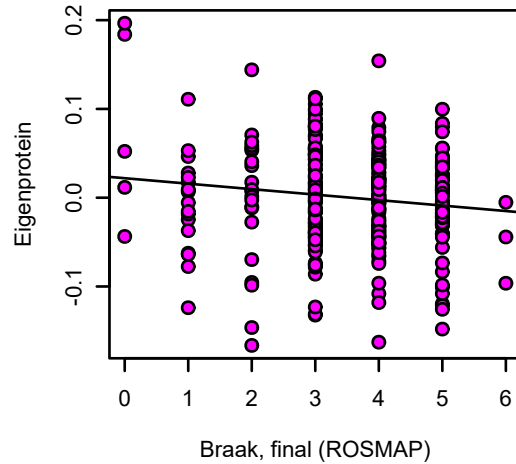

**bicor=-0.079, p=0.16**  
**cor=-0.072, p=0.2**

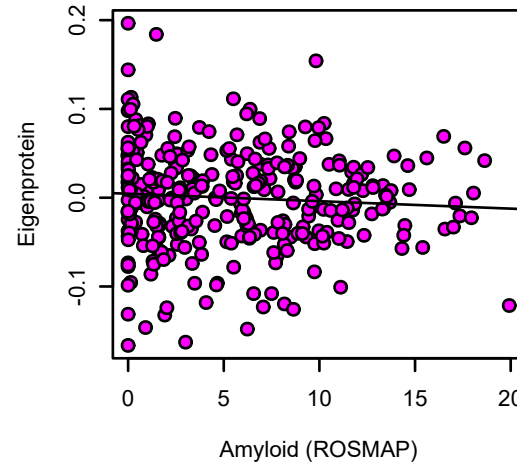

**bicor=-0.13, p=0.015**  
**cor=-0.15, p=0.007**

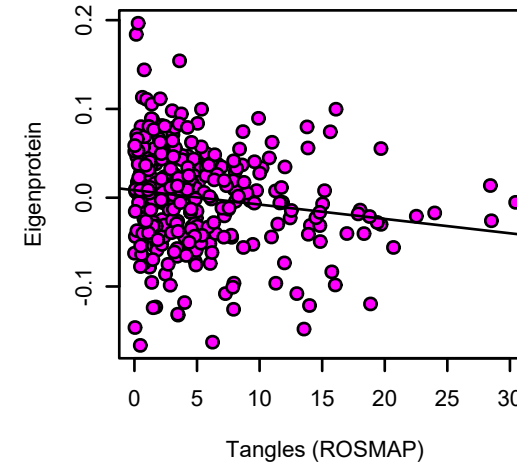

**bicor=-0.17, p=0.002**  
**cor=-0.17, p=0.0022**

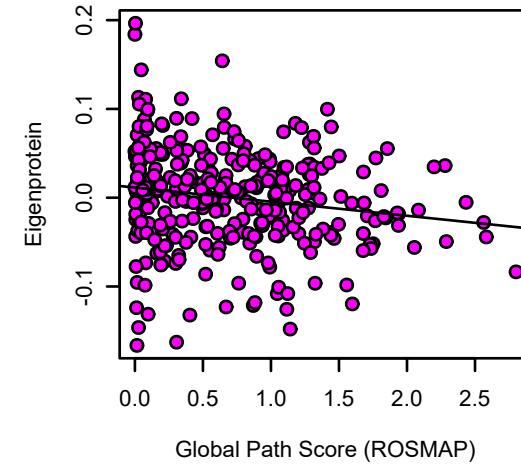







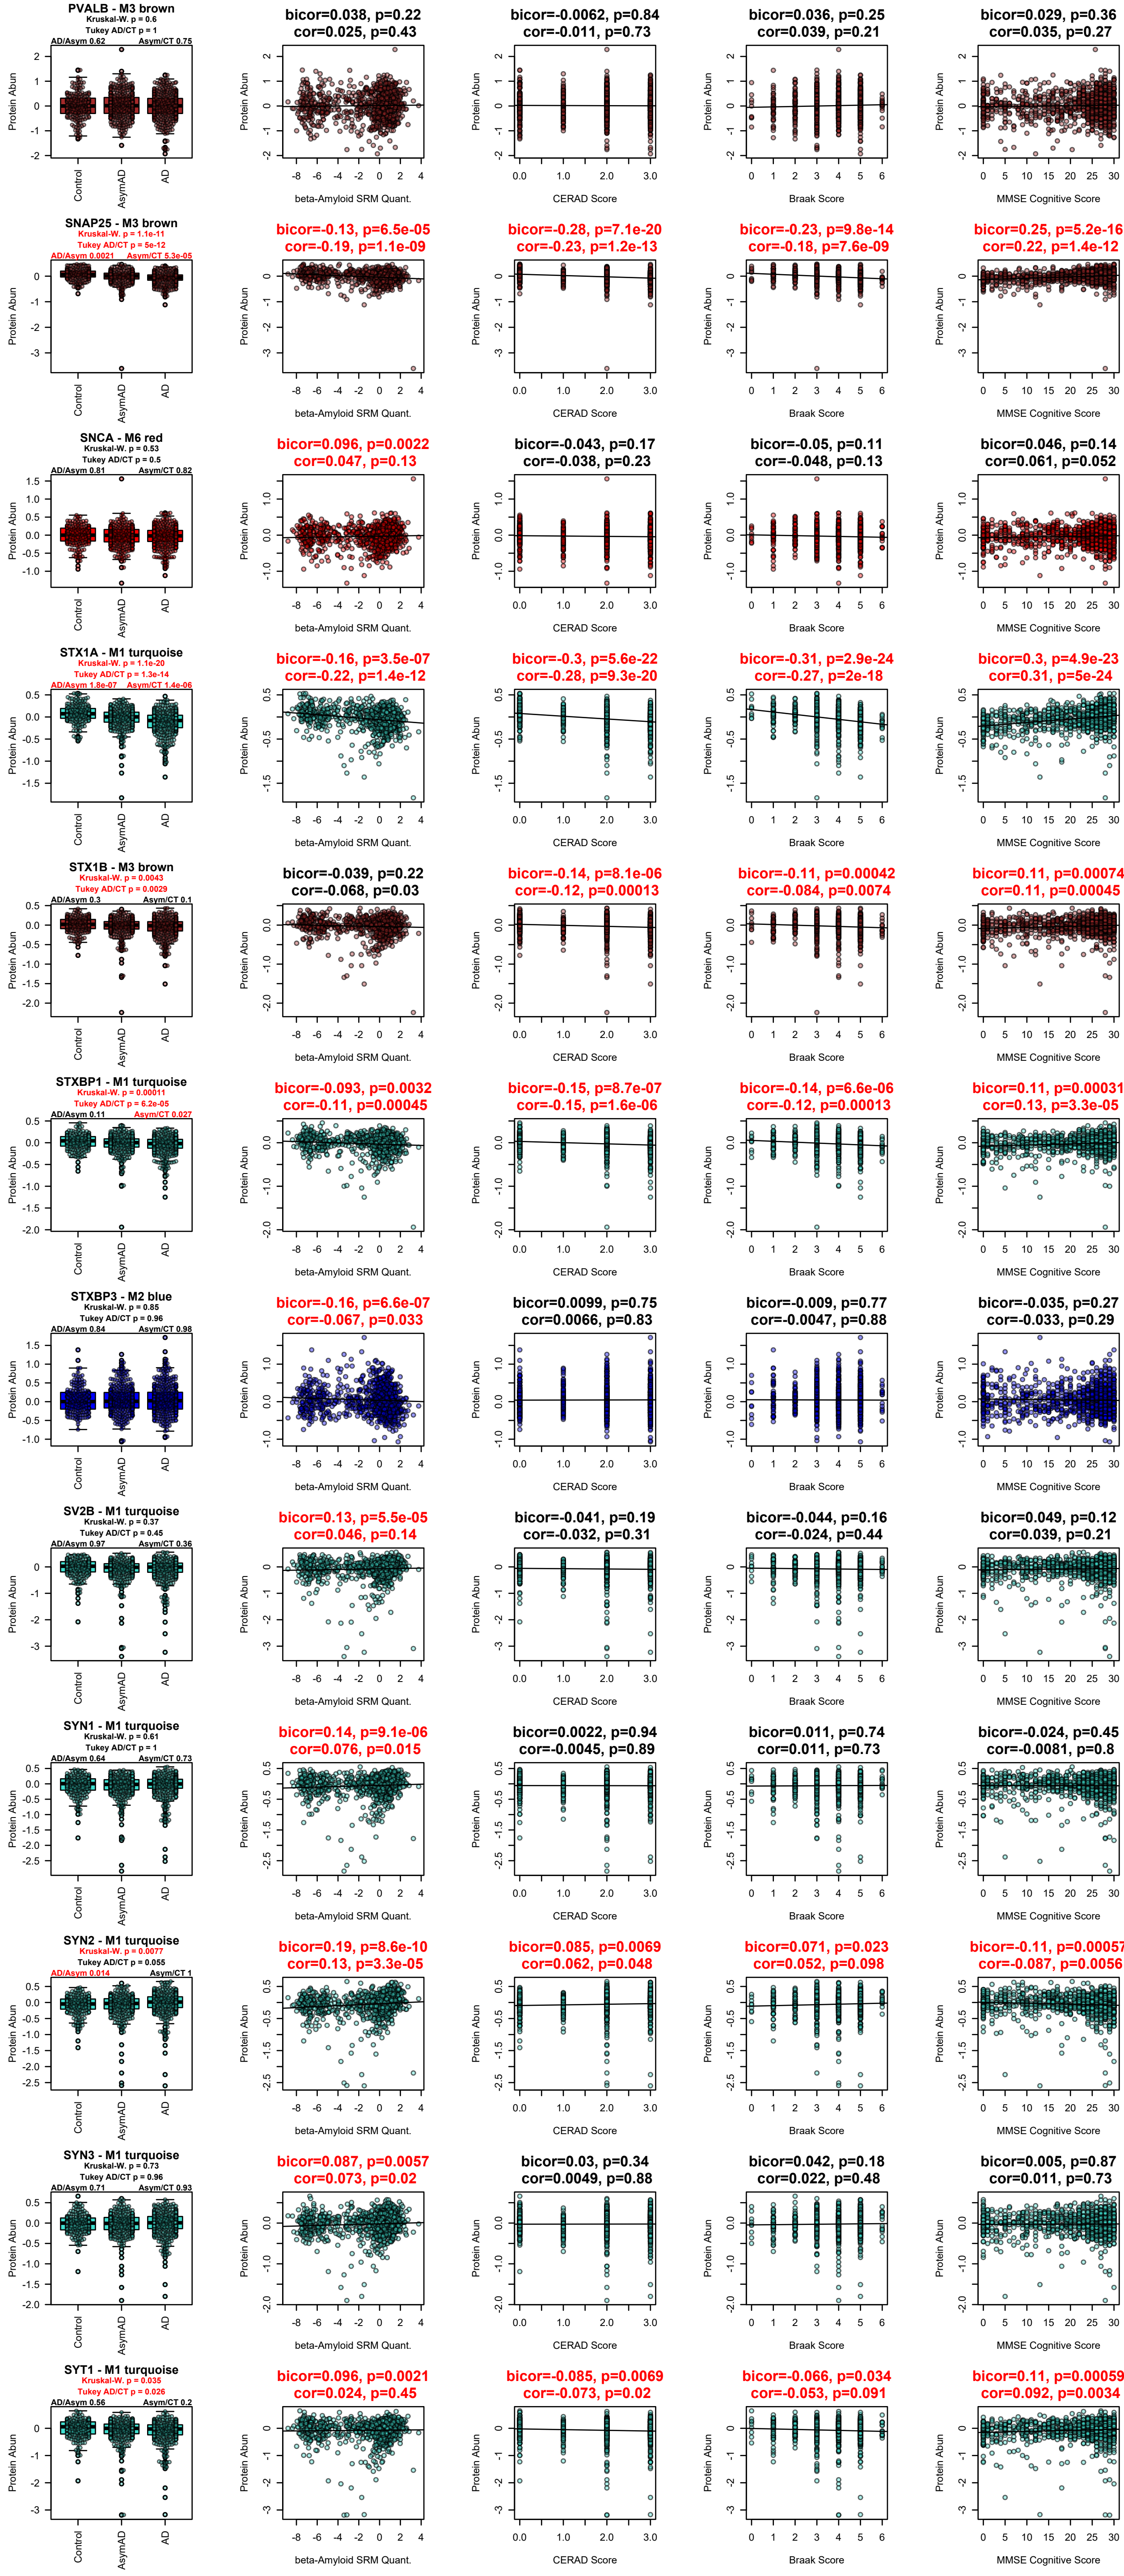



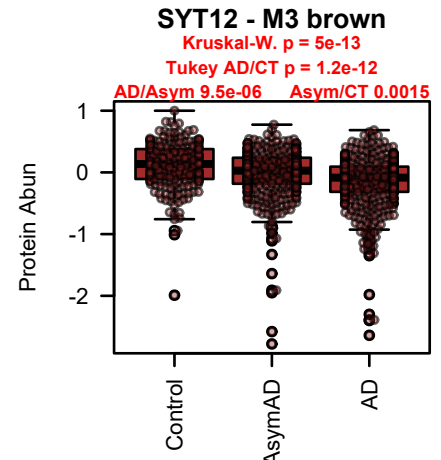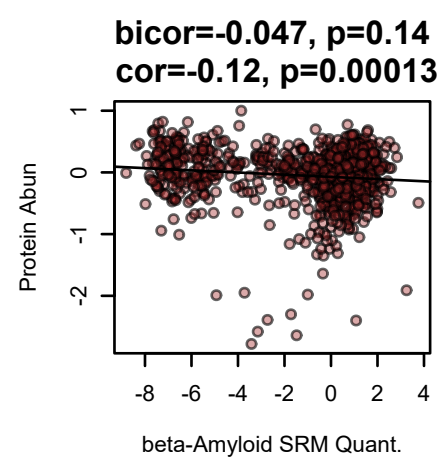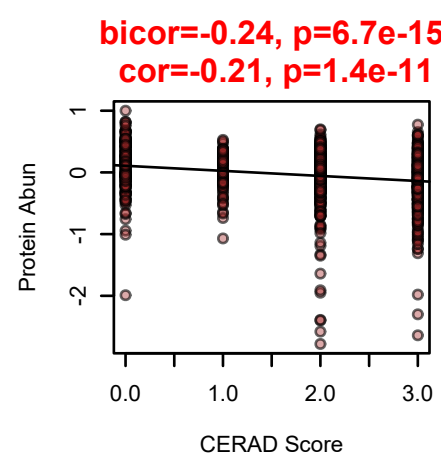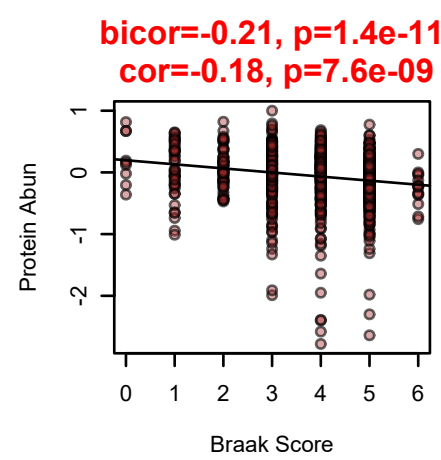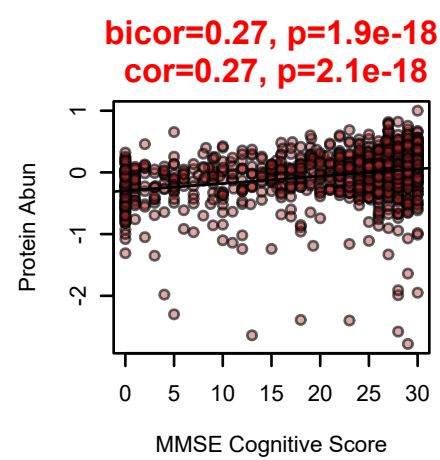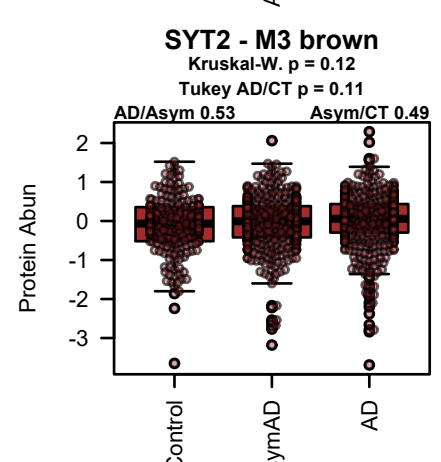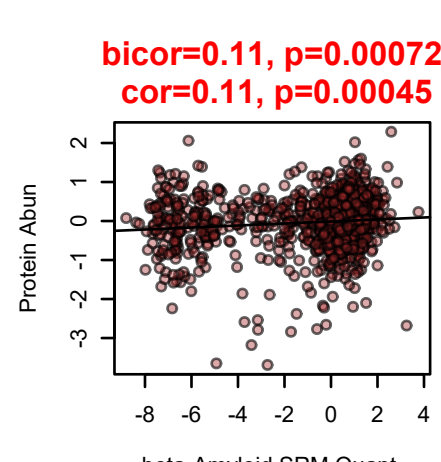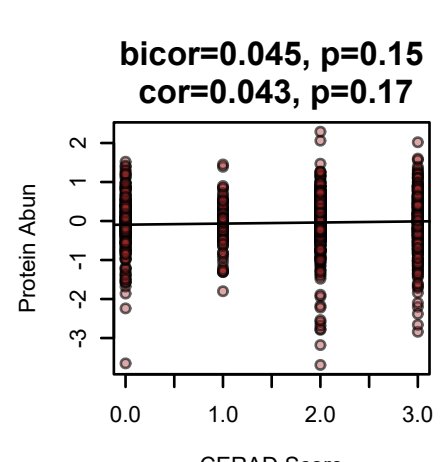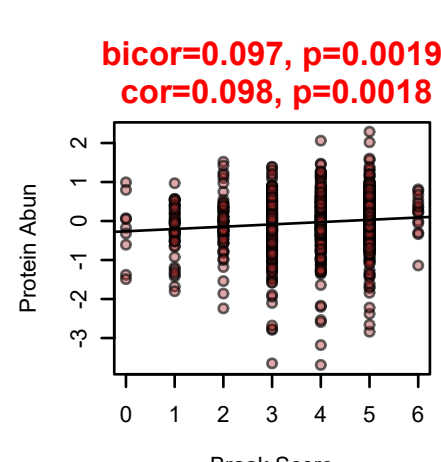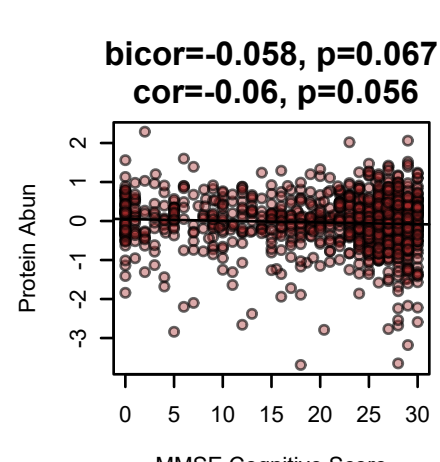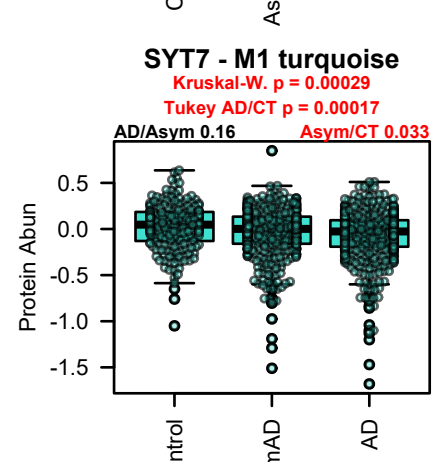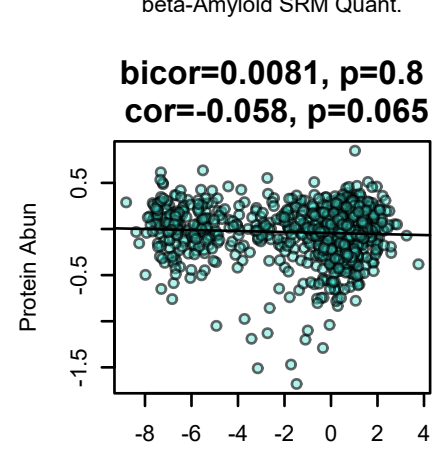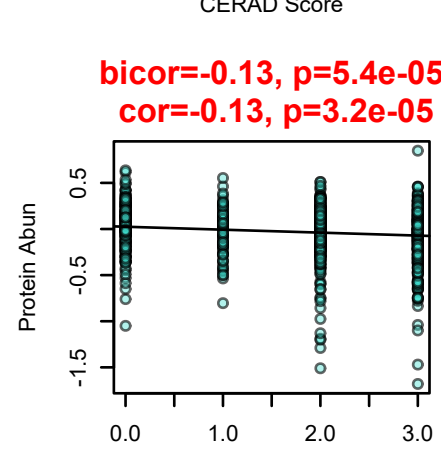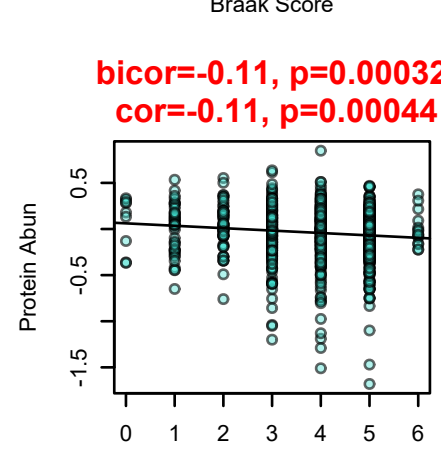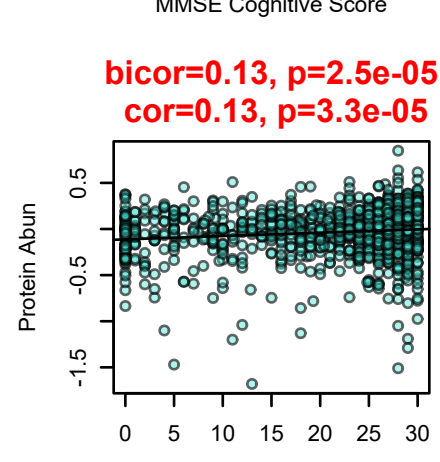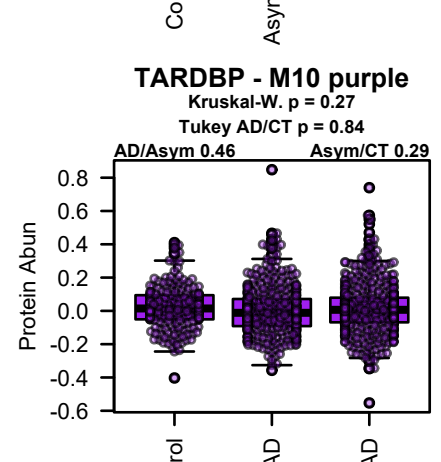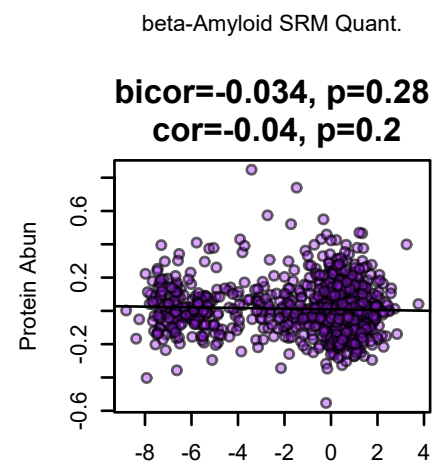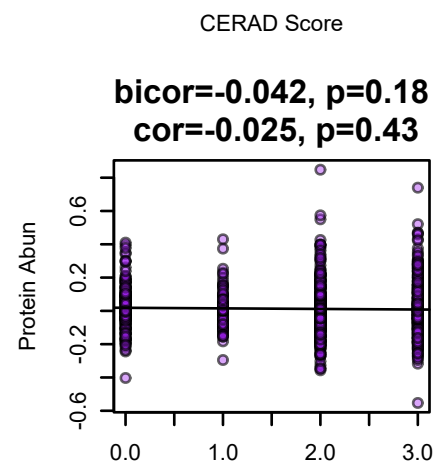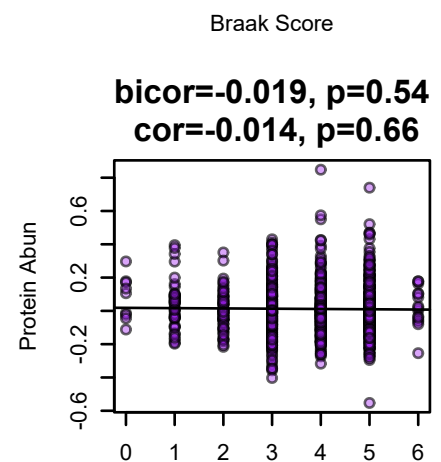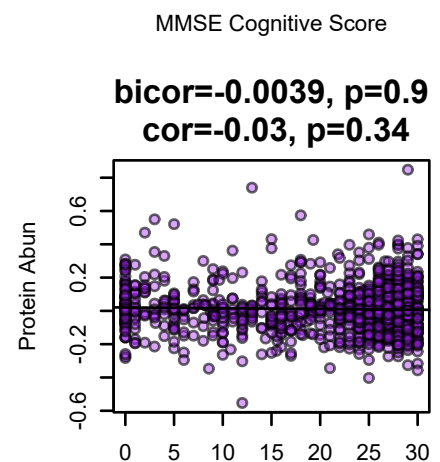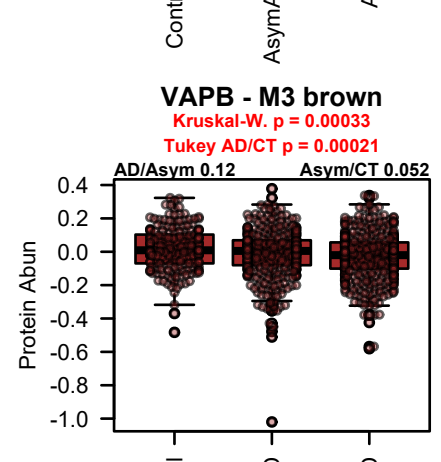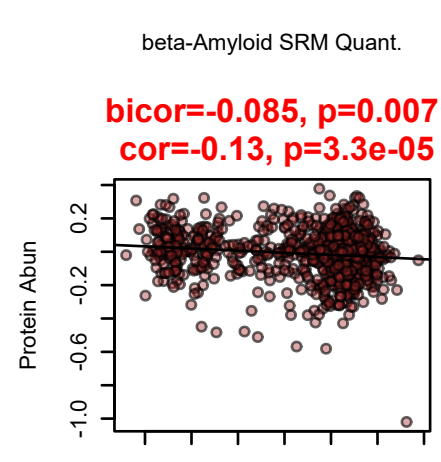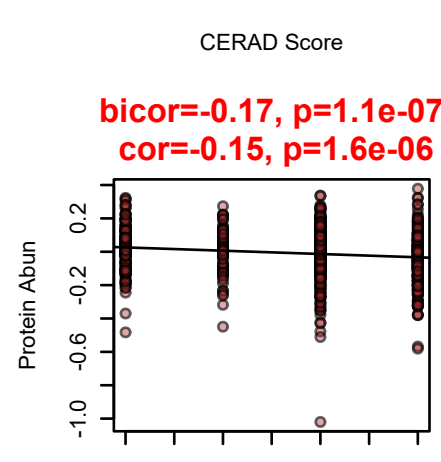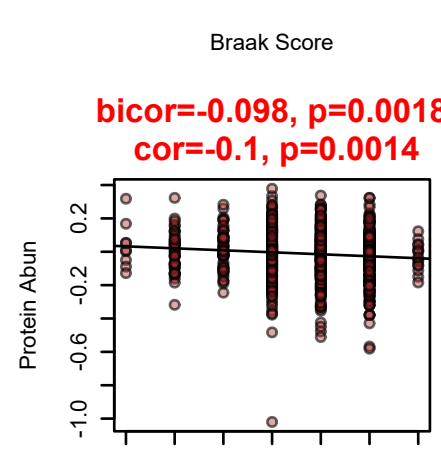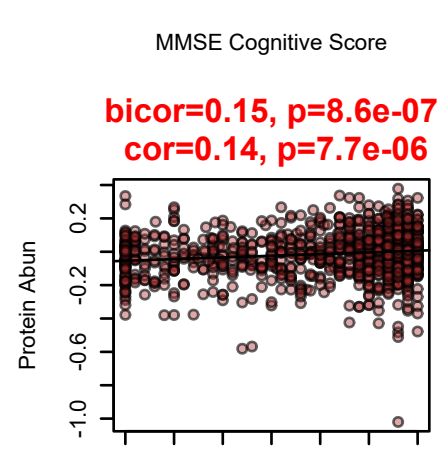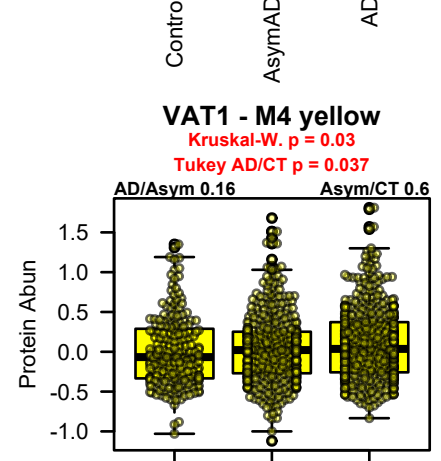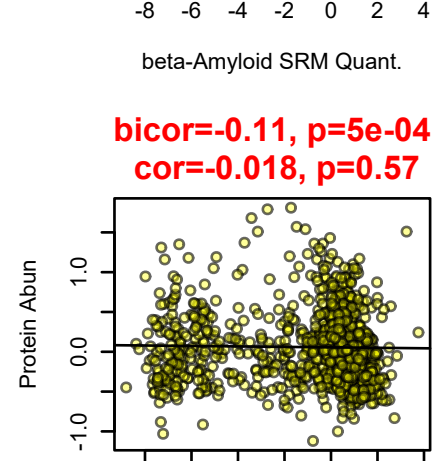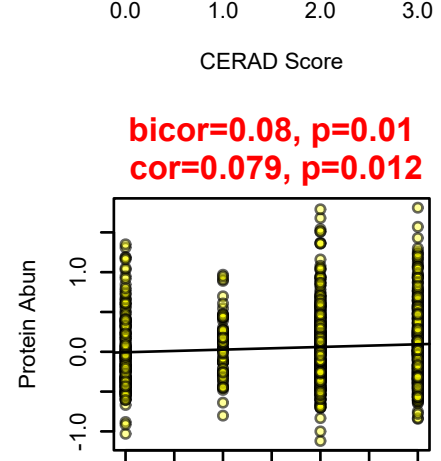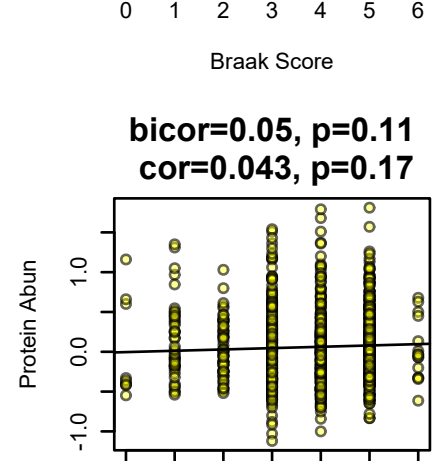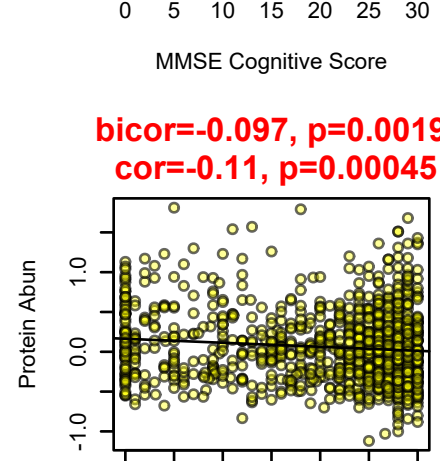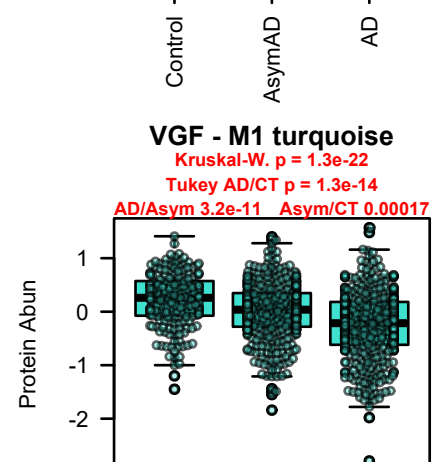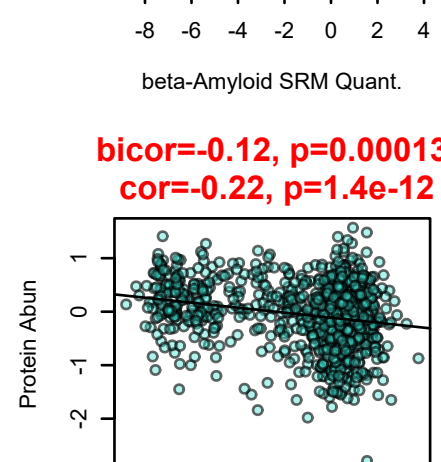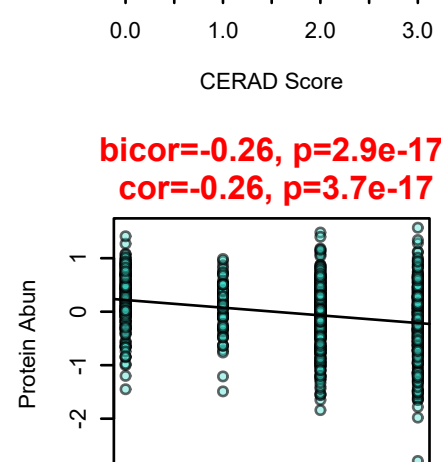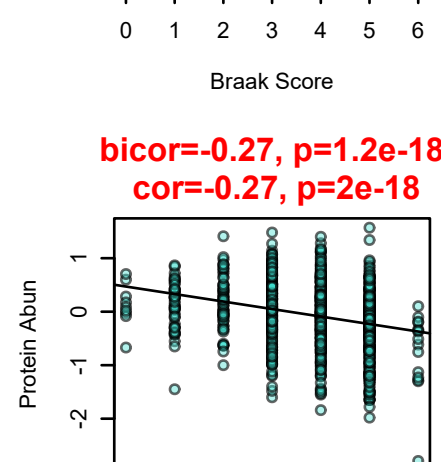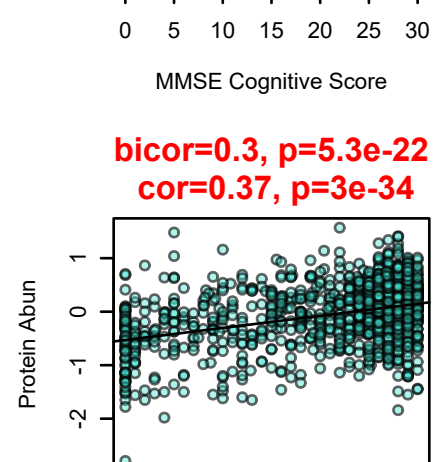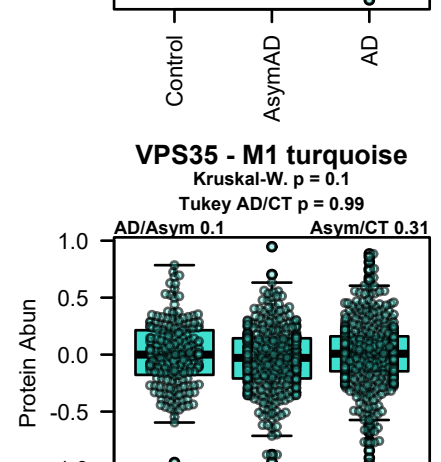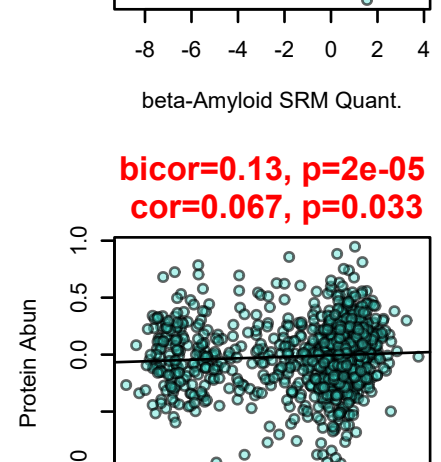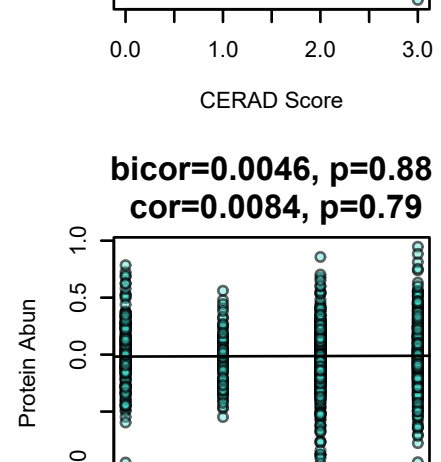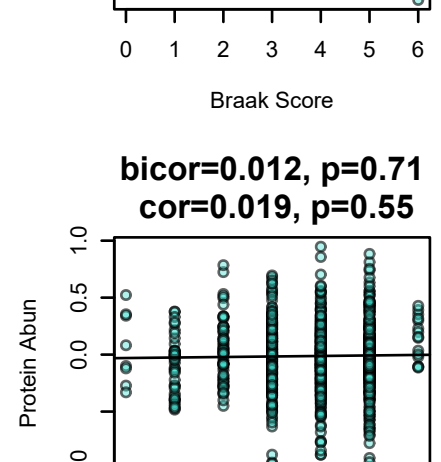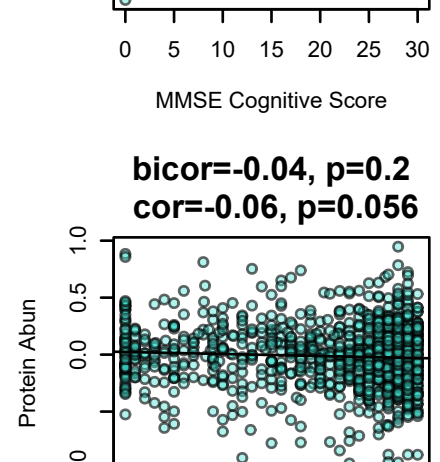



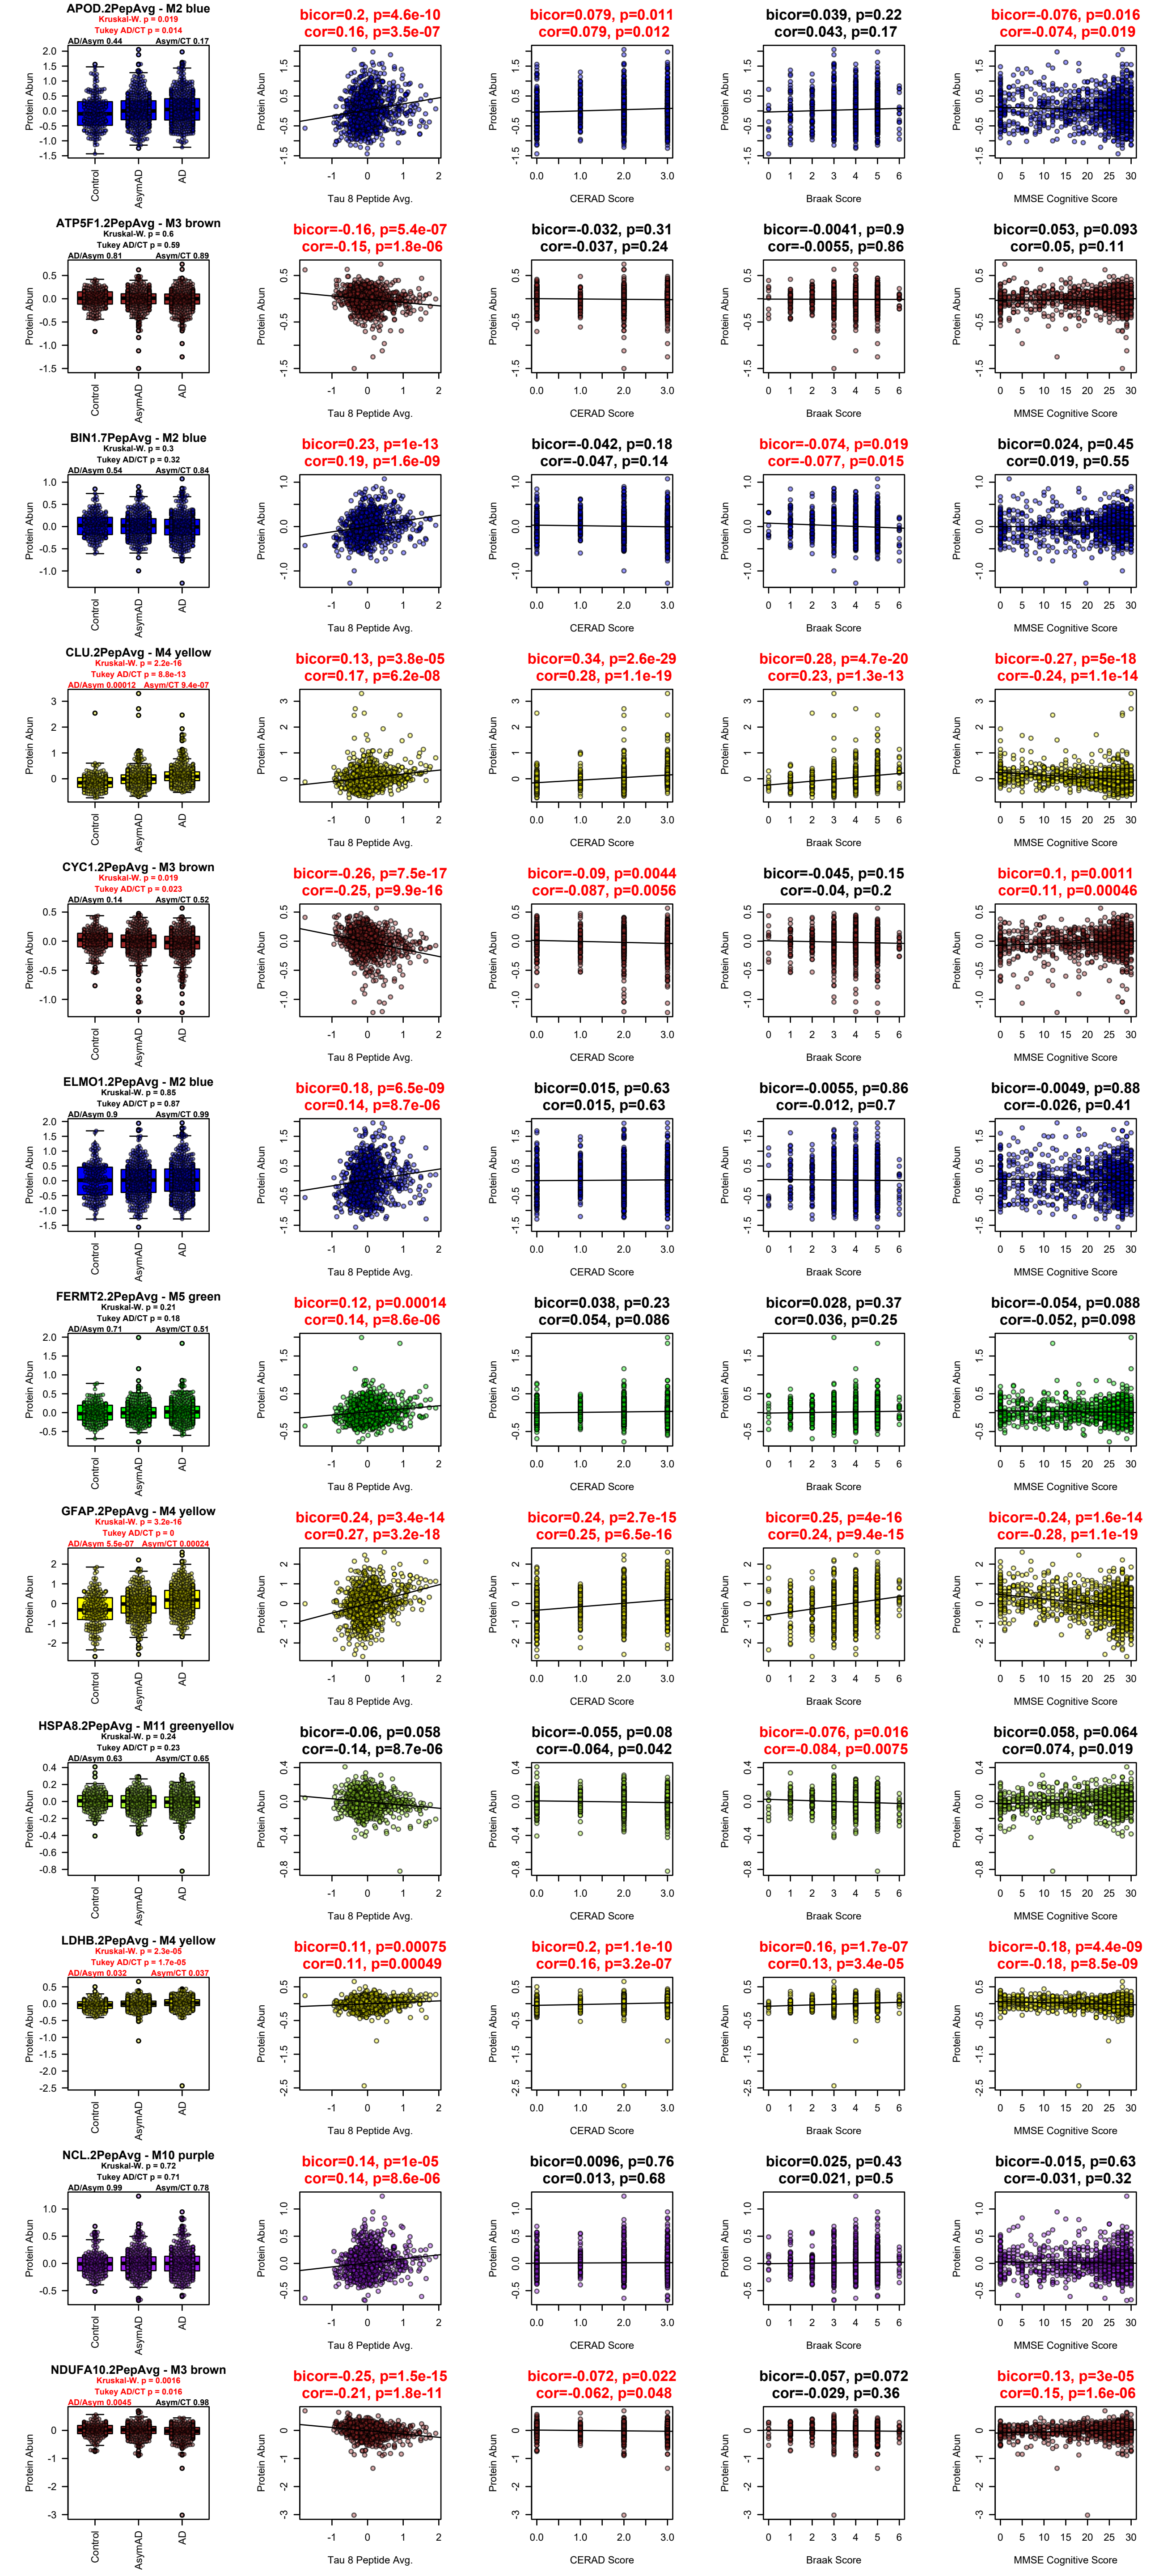



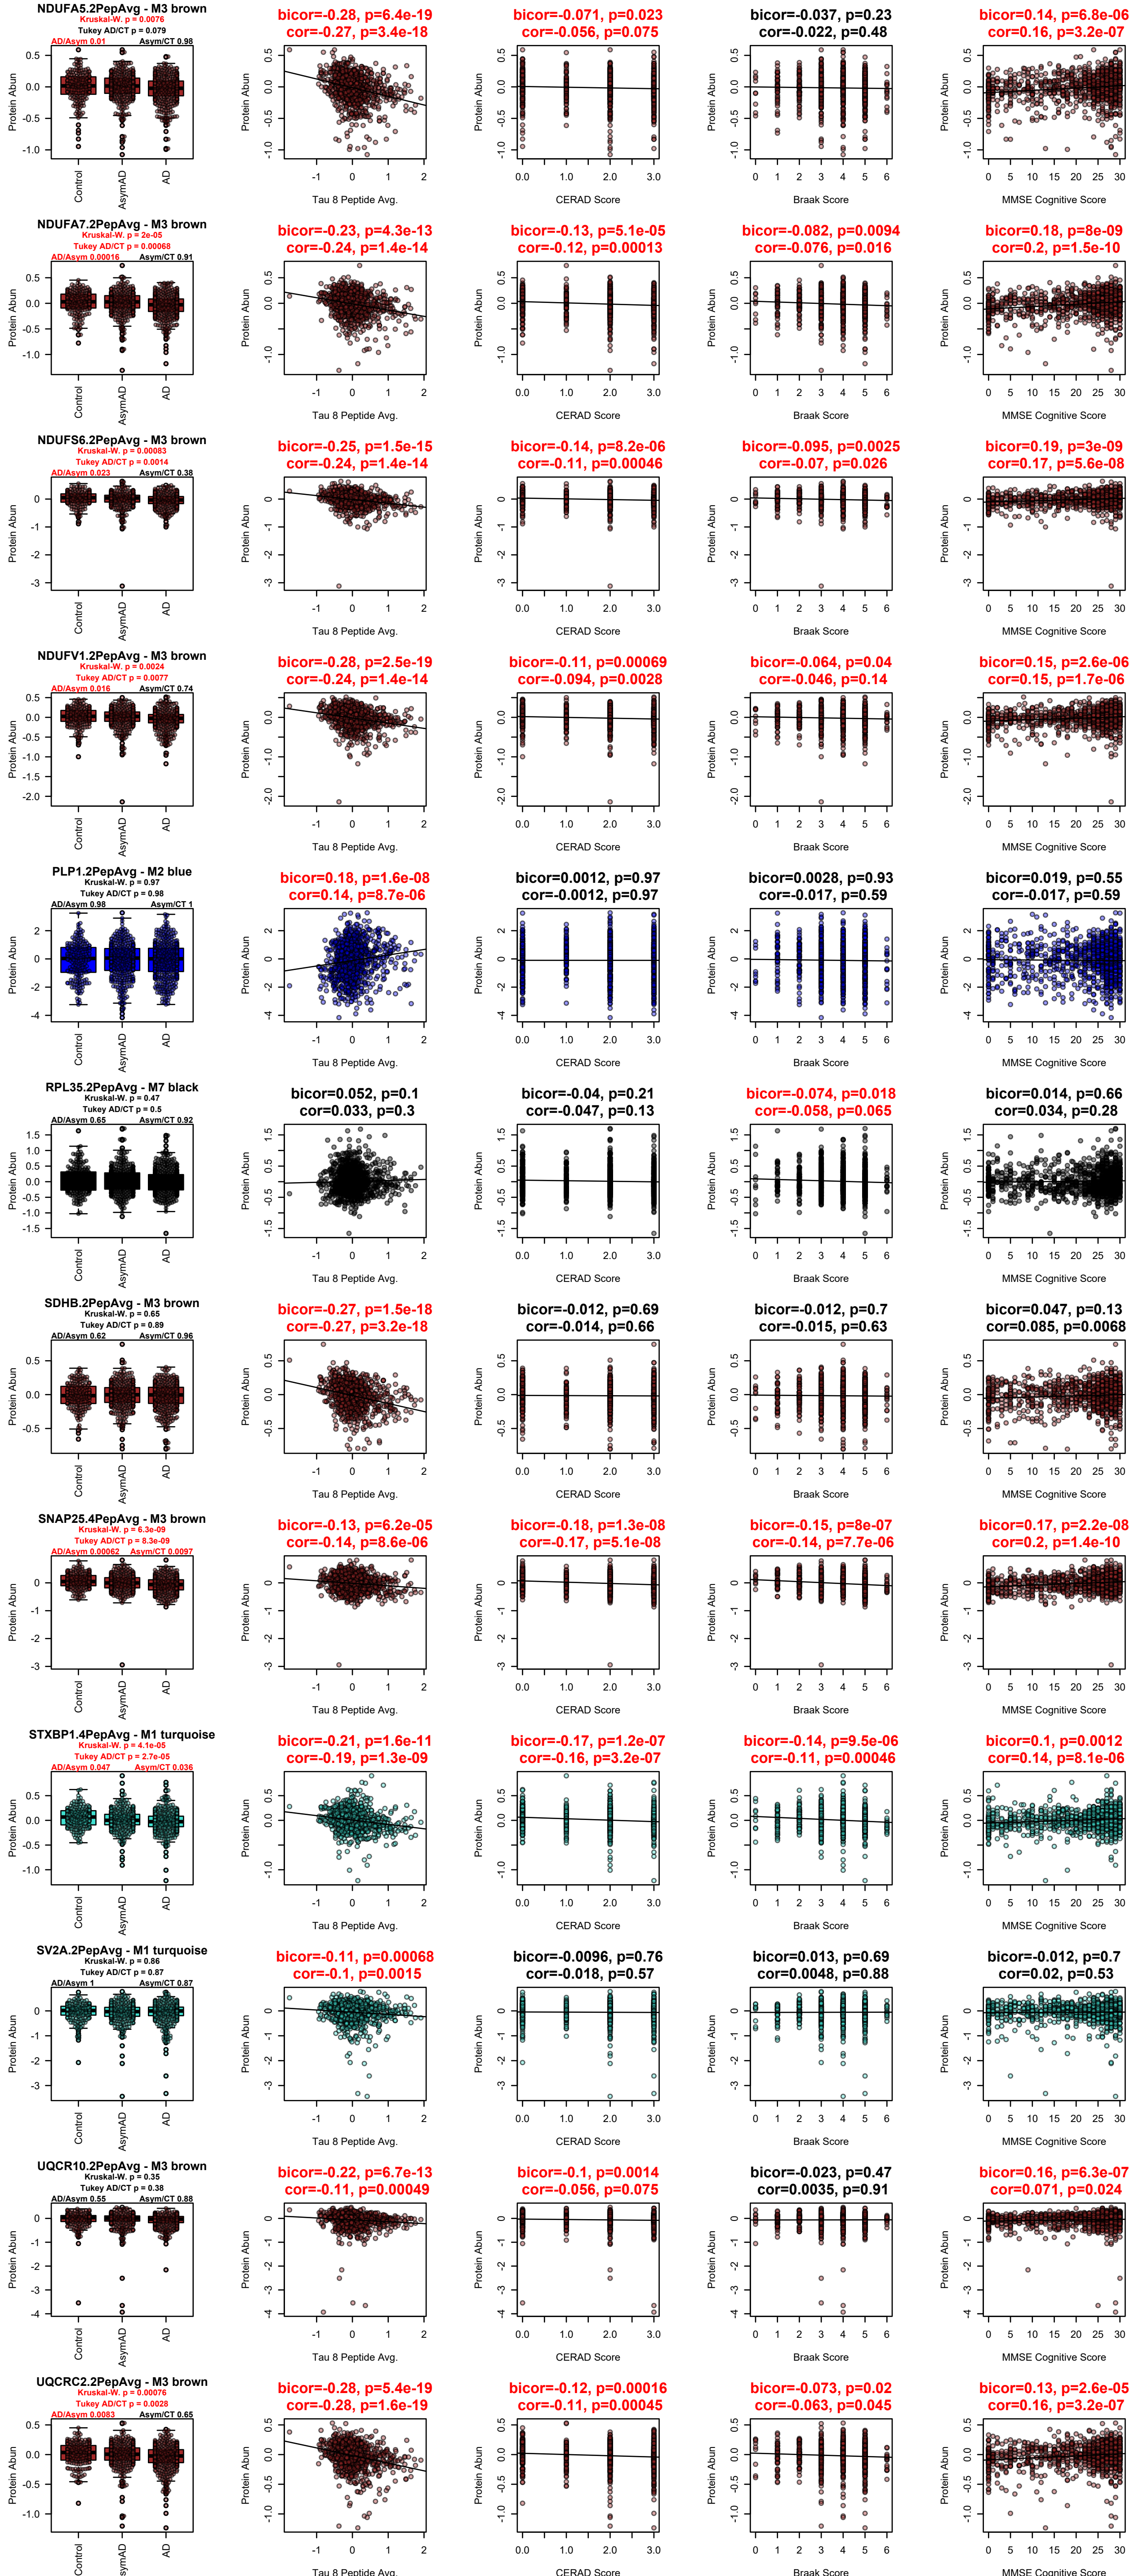



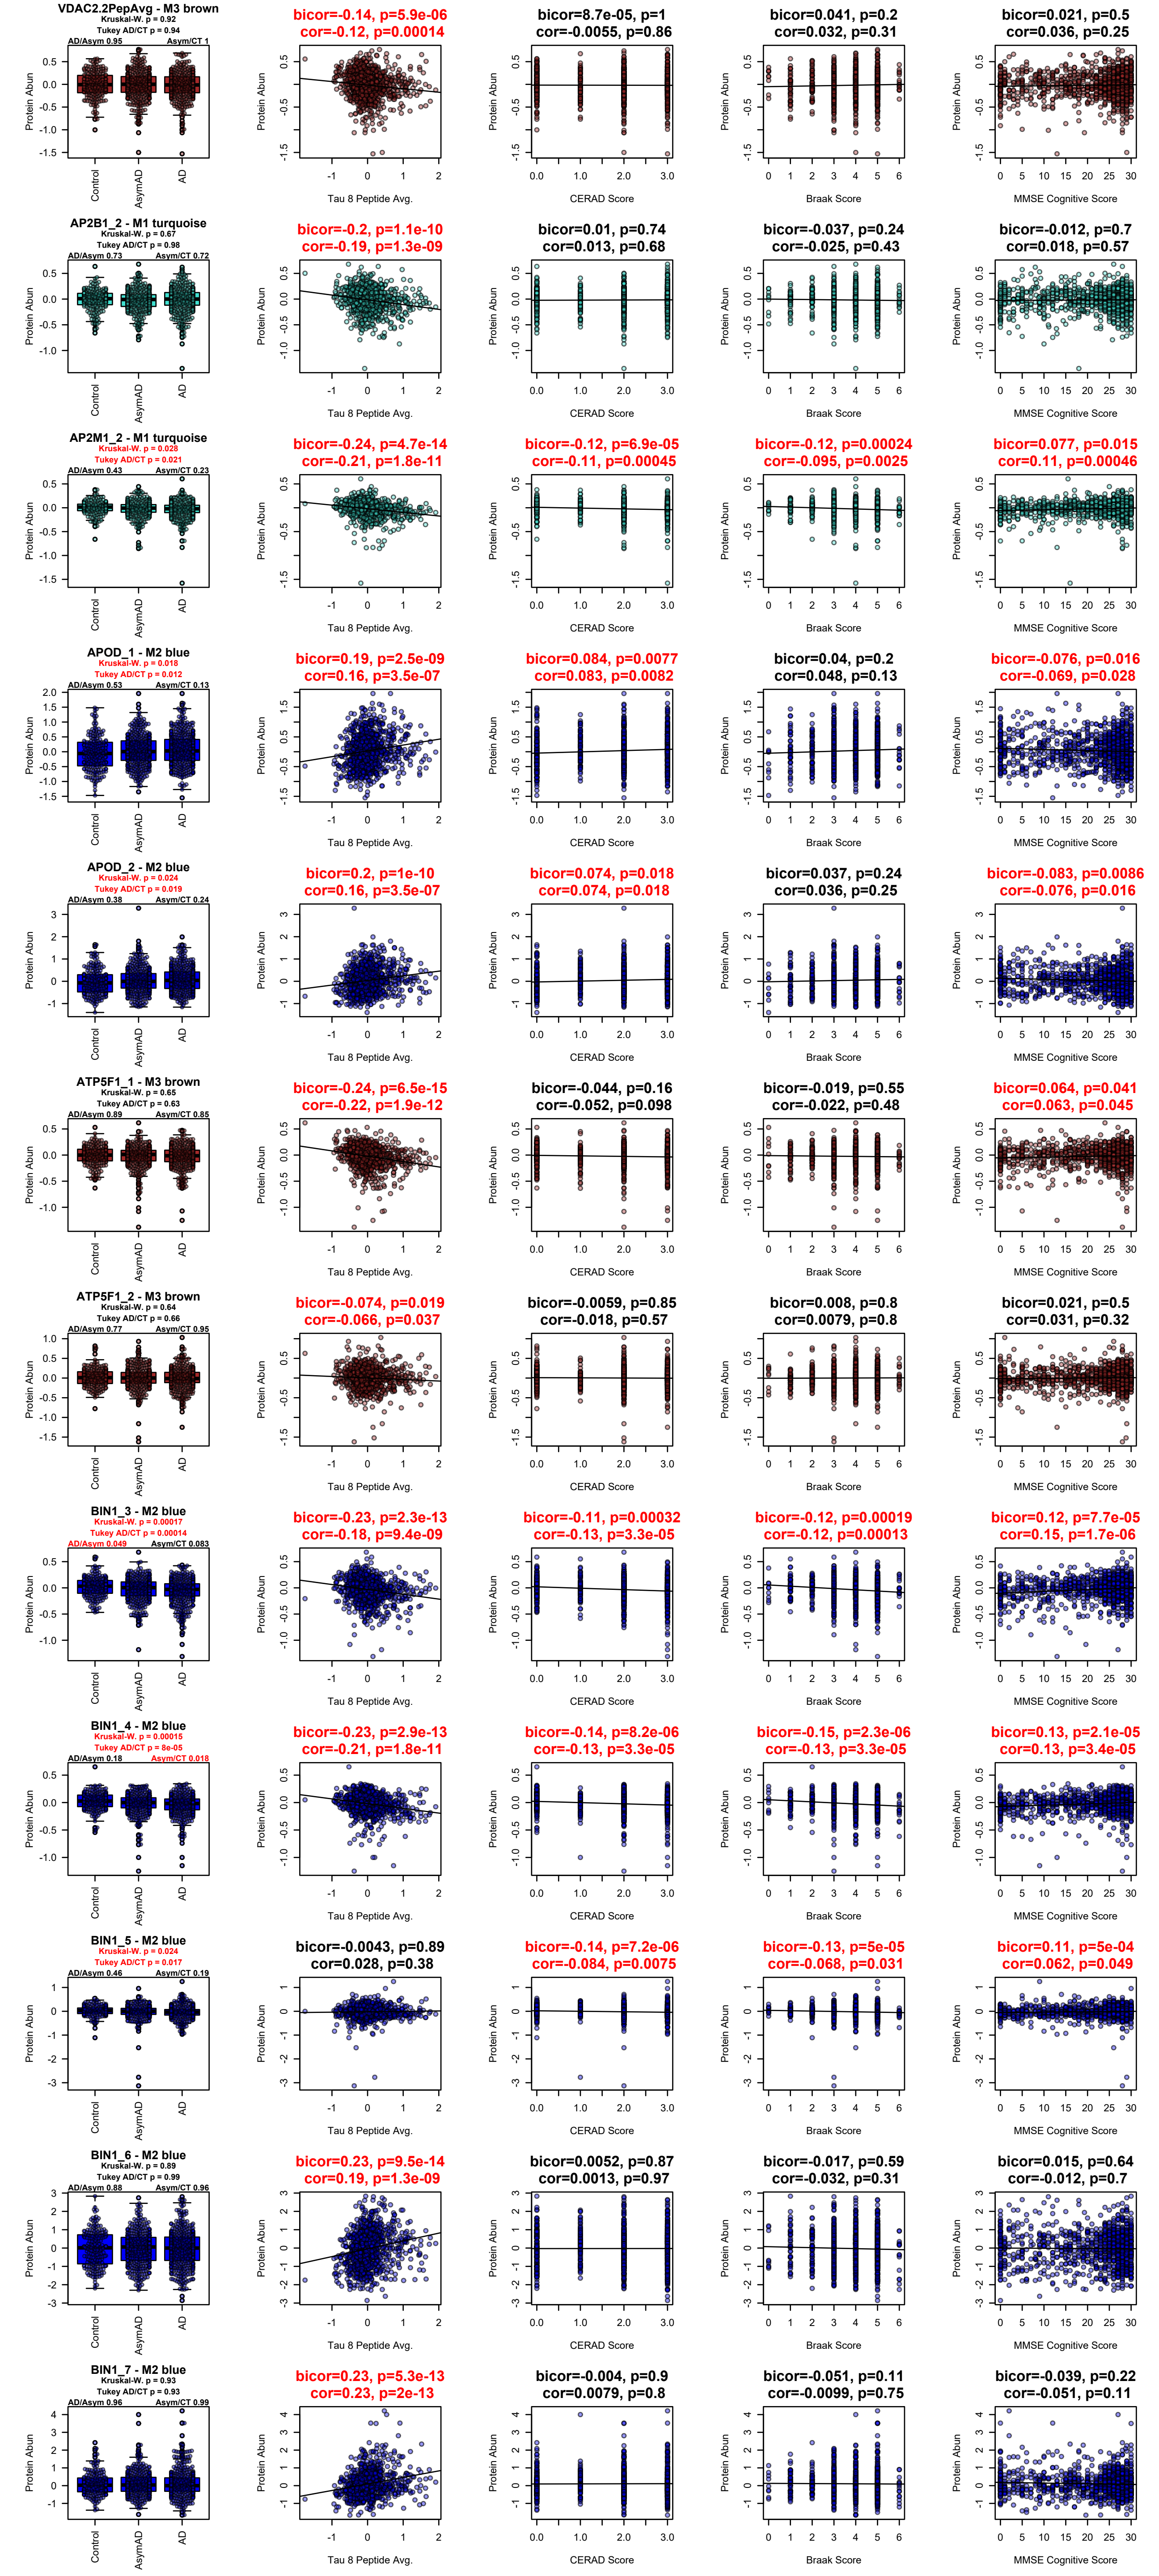



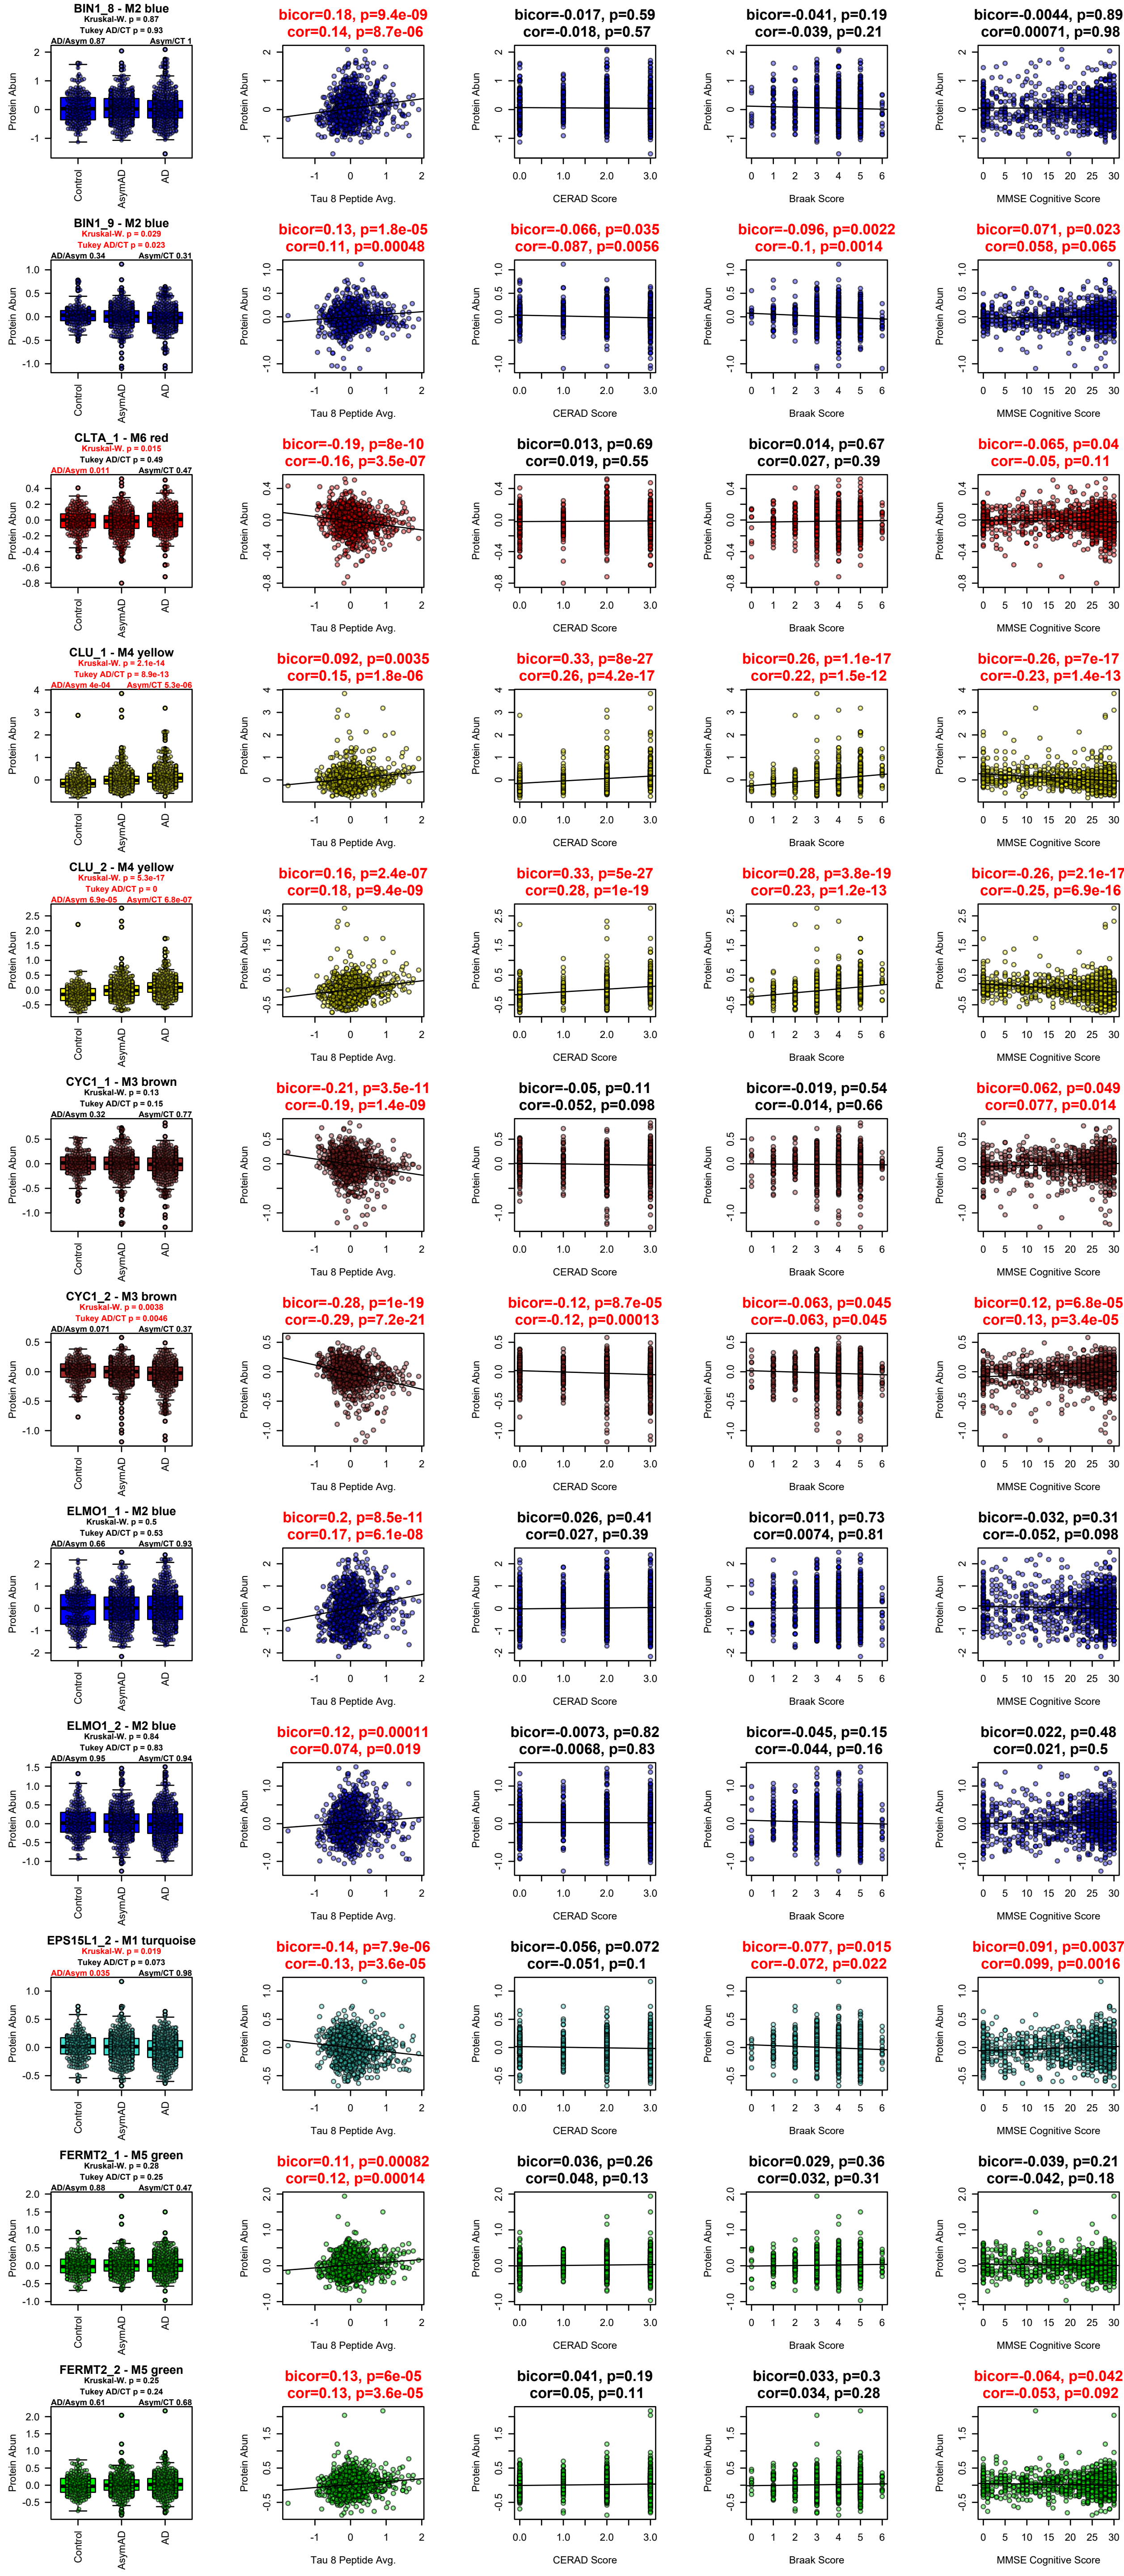



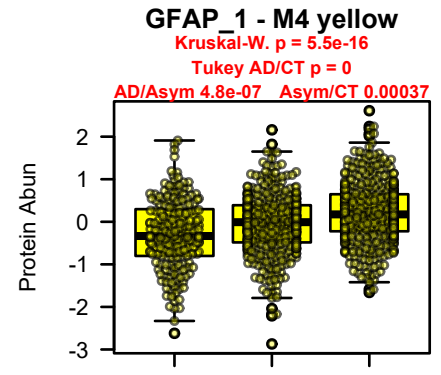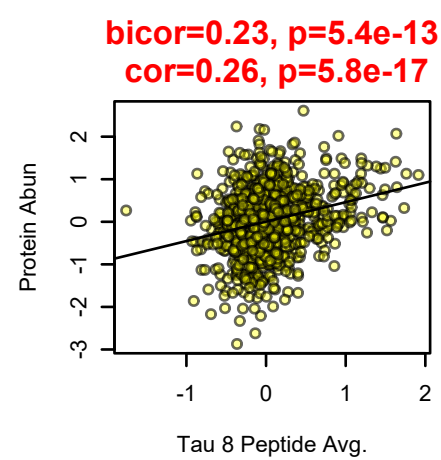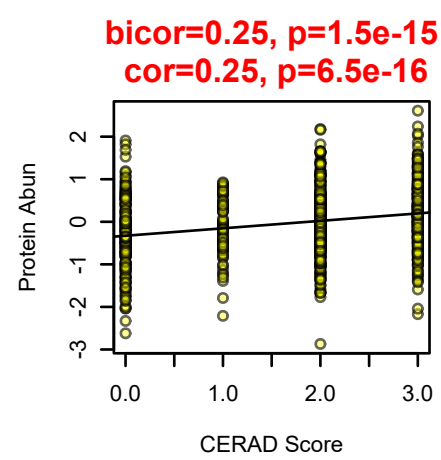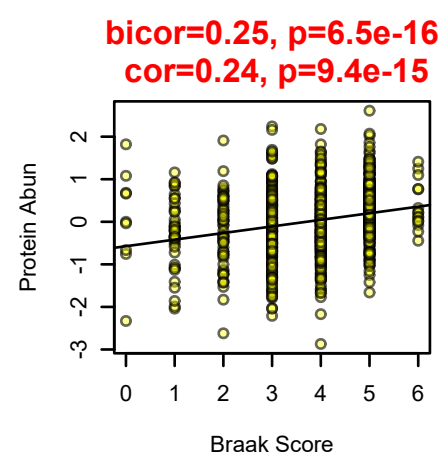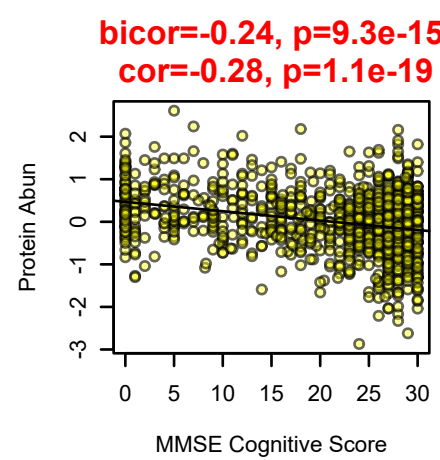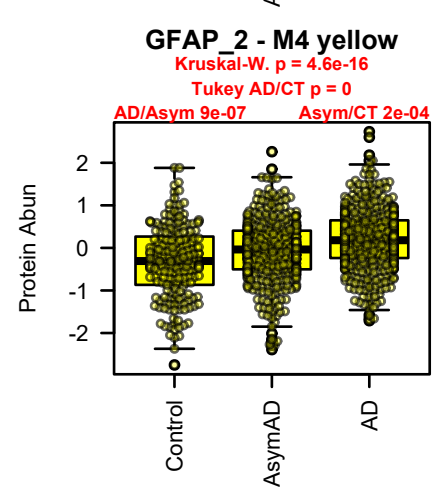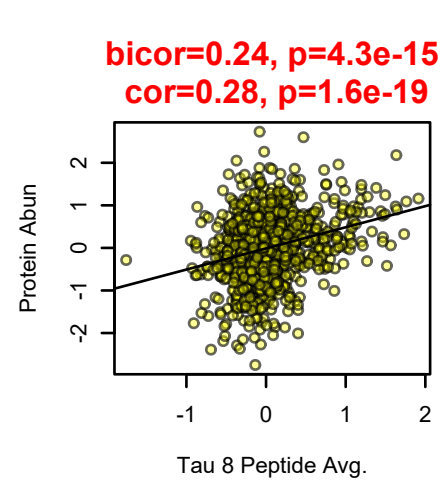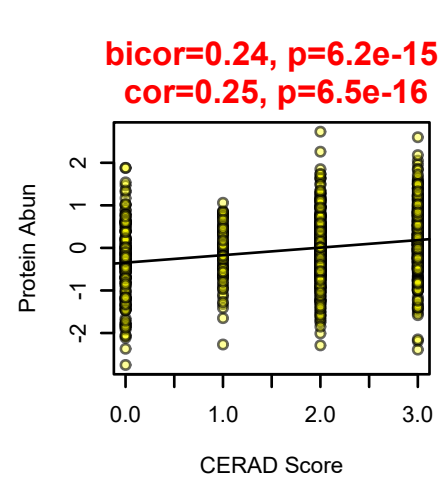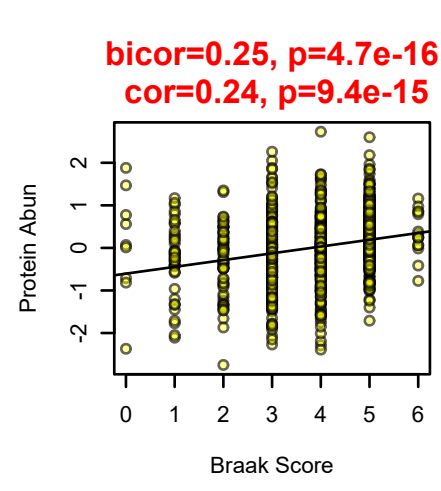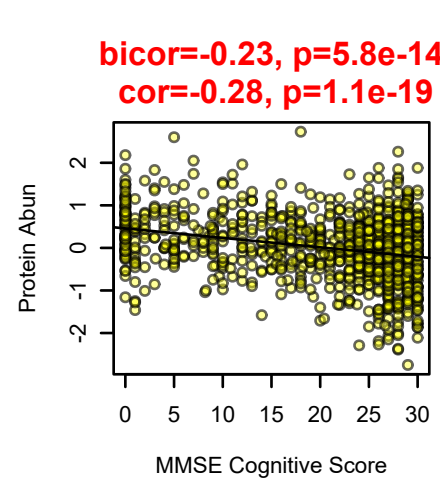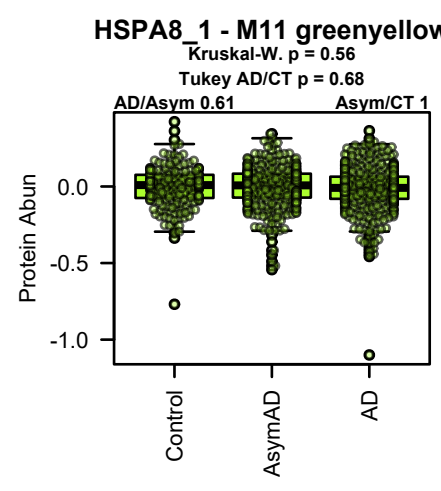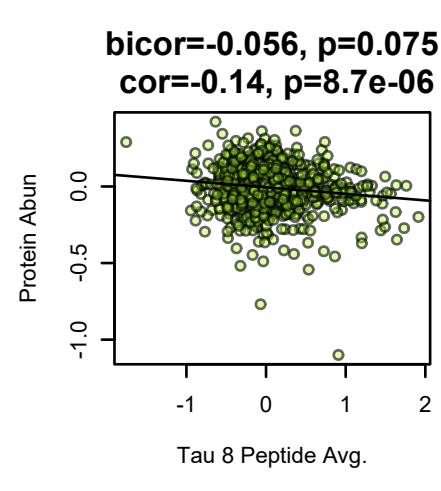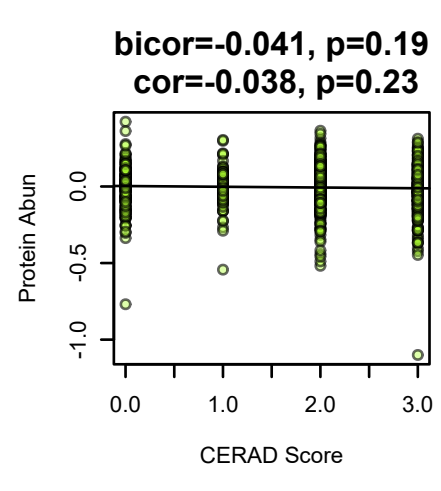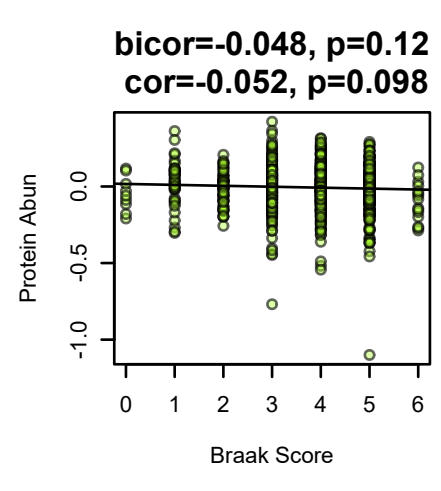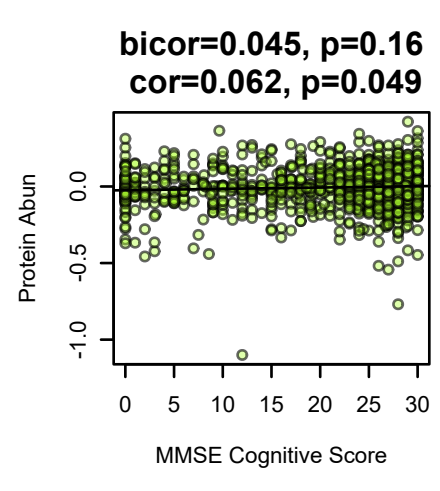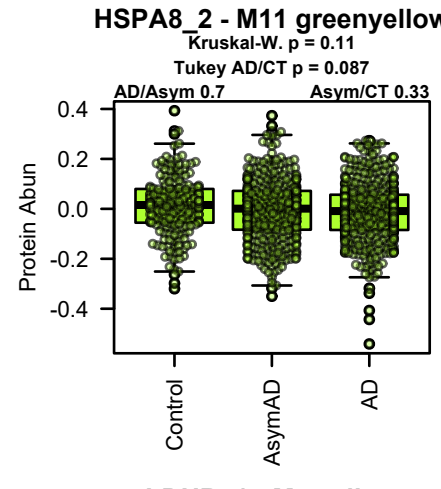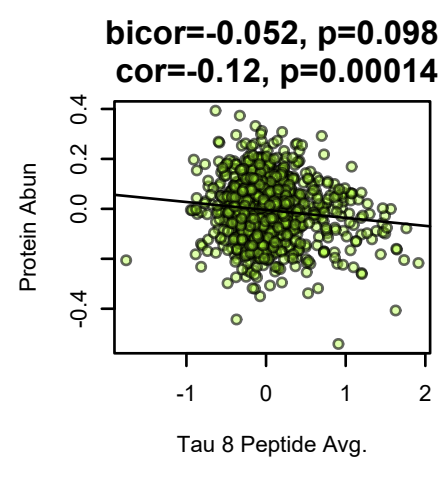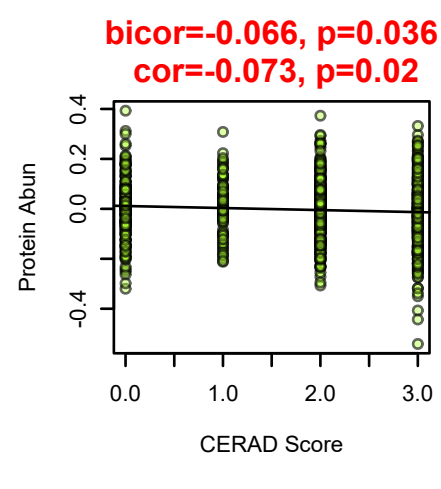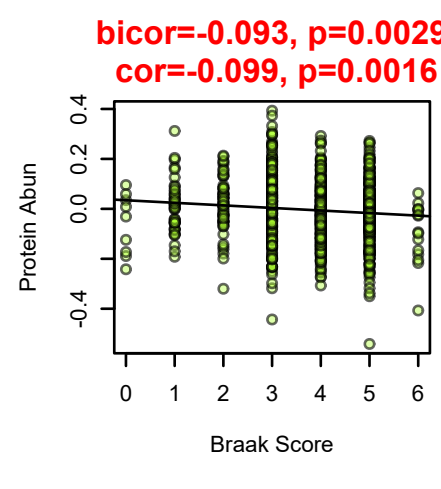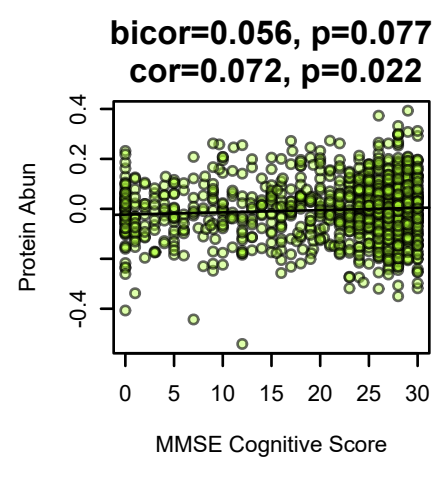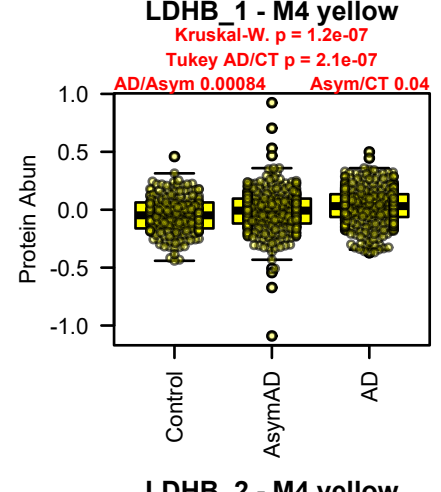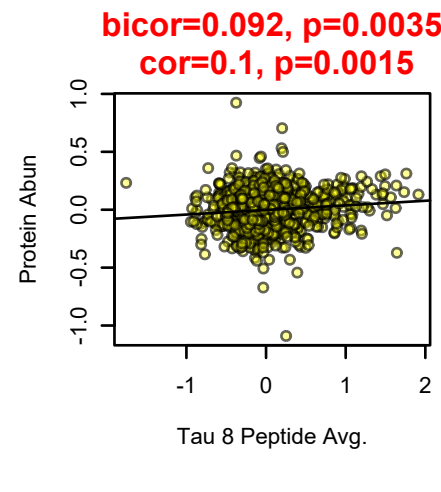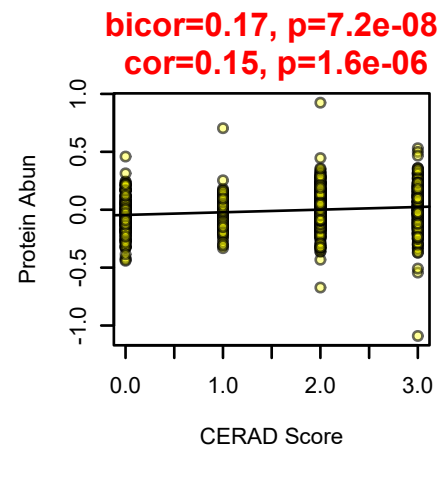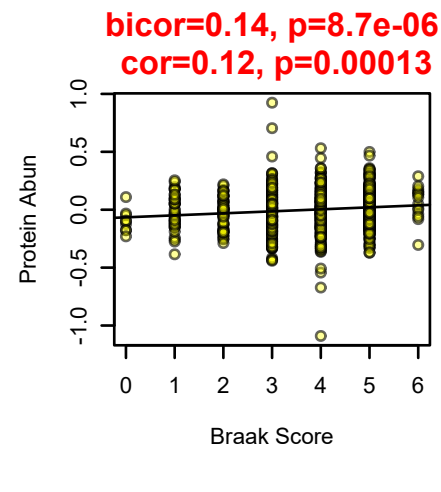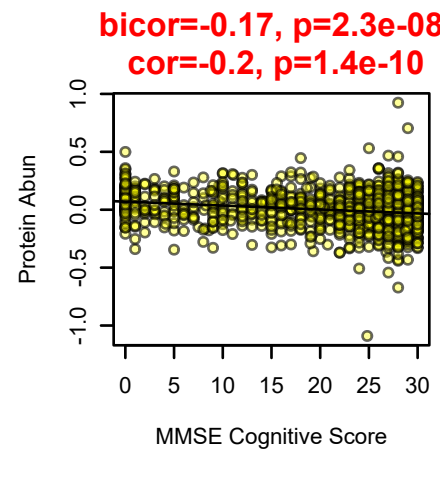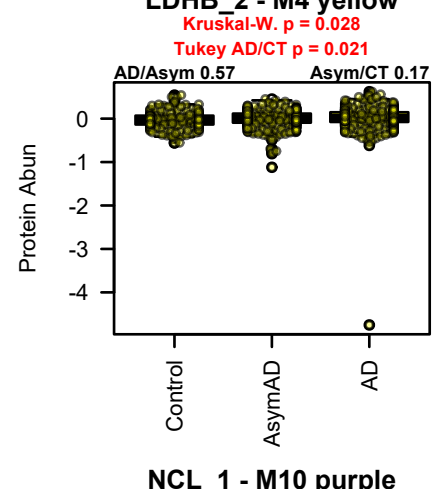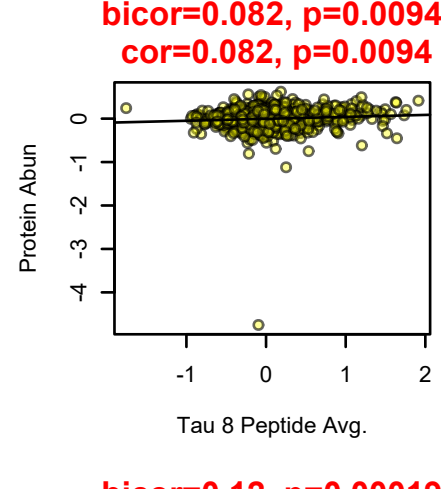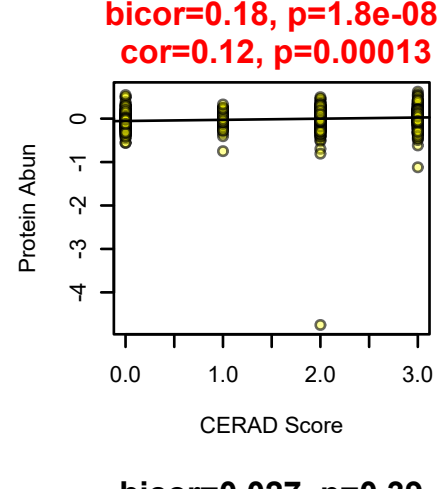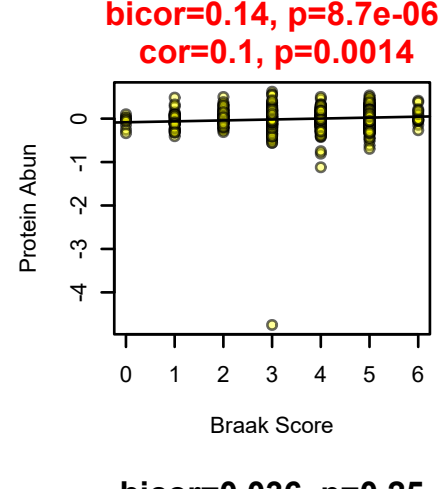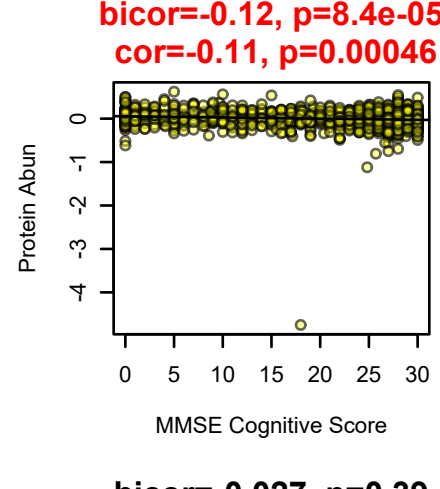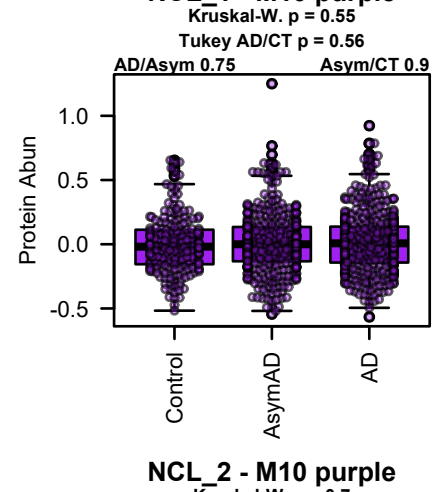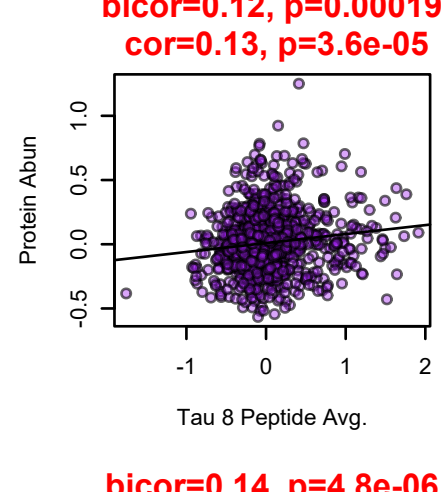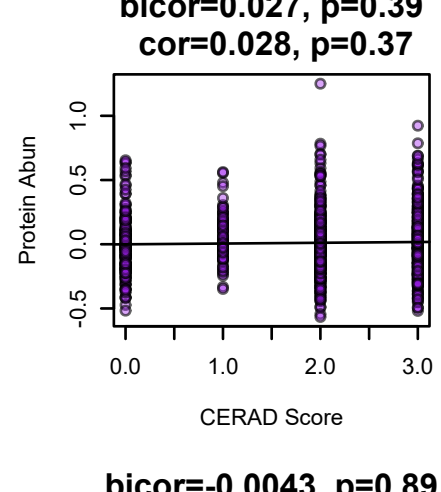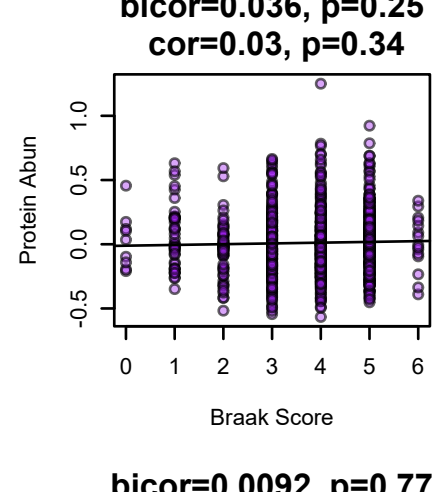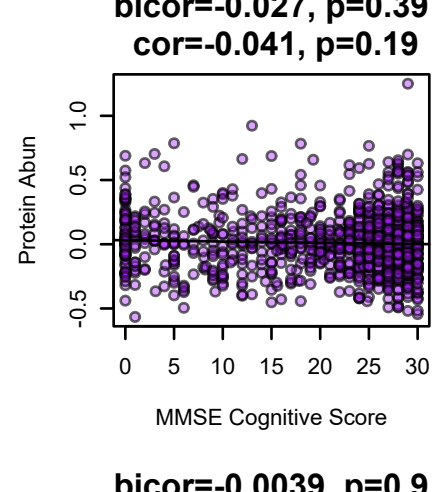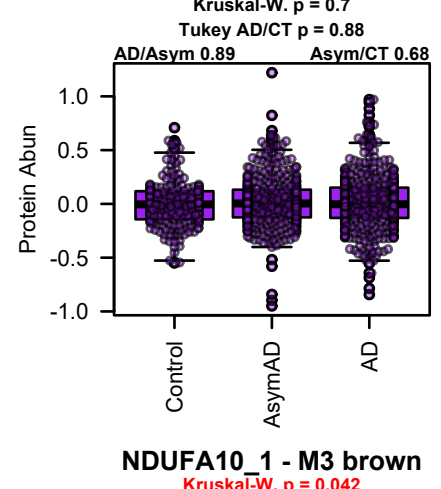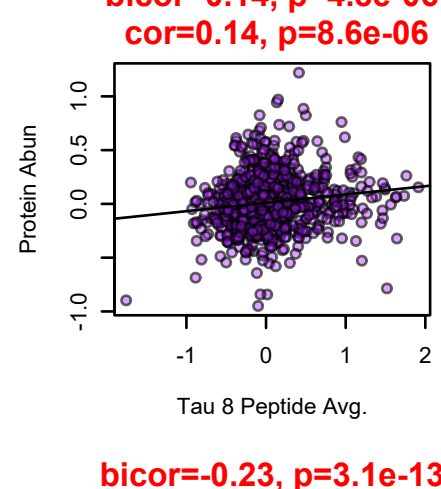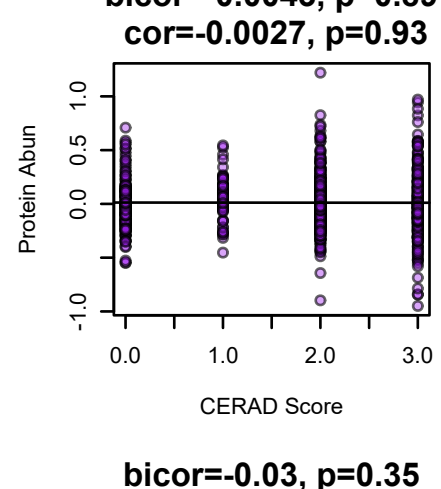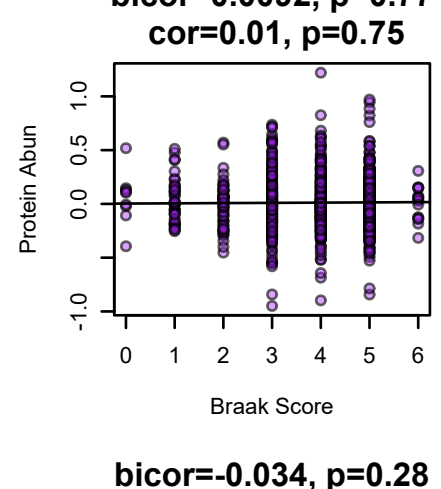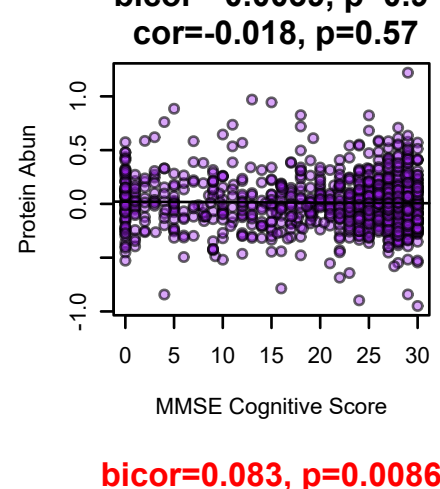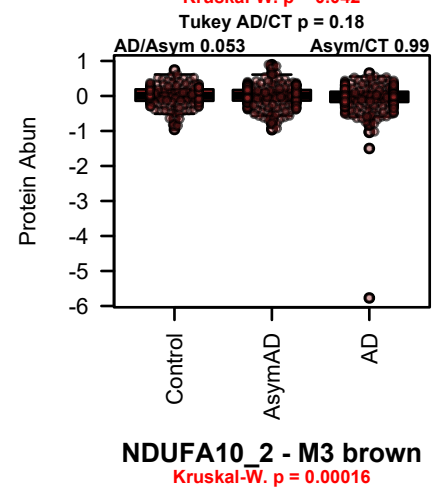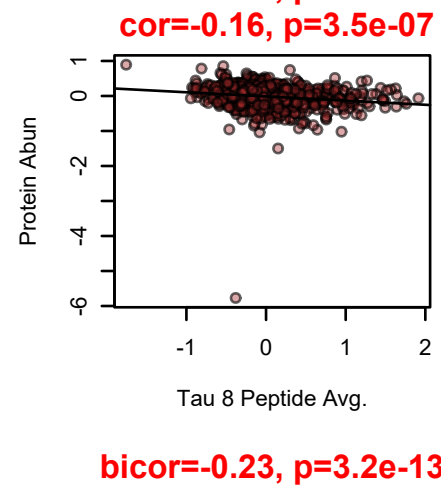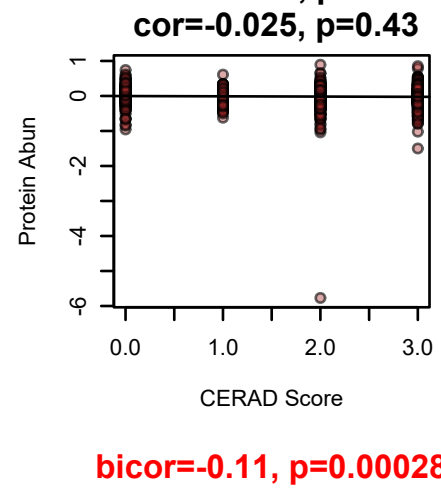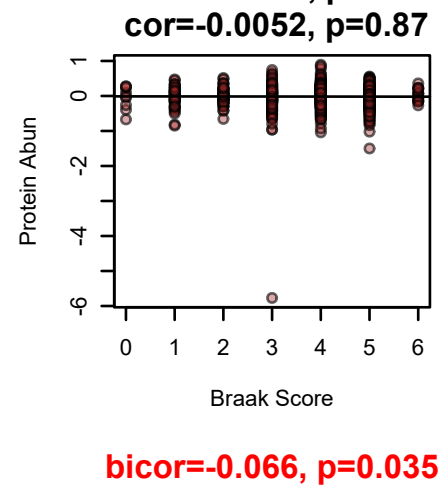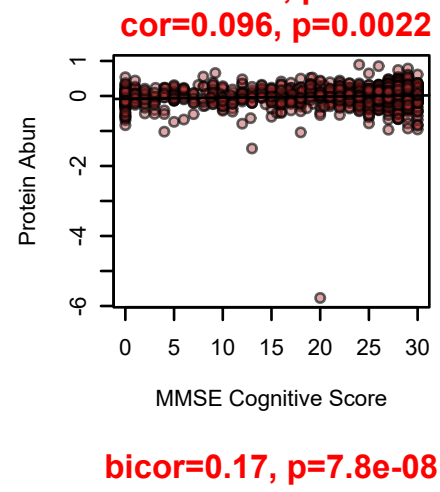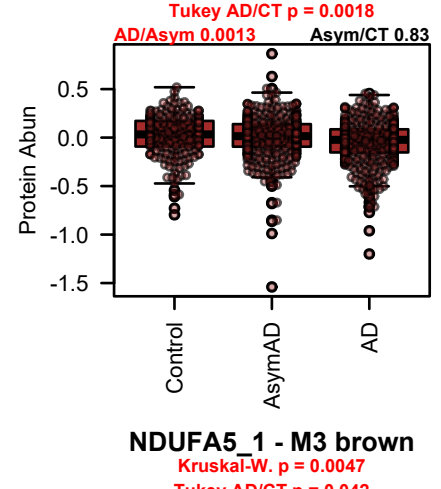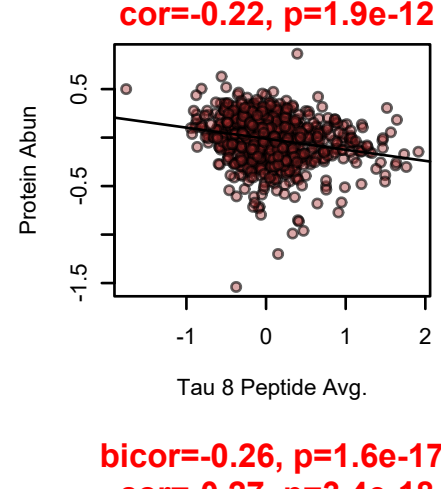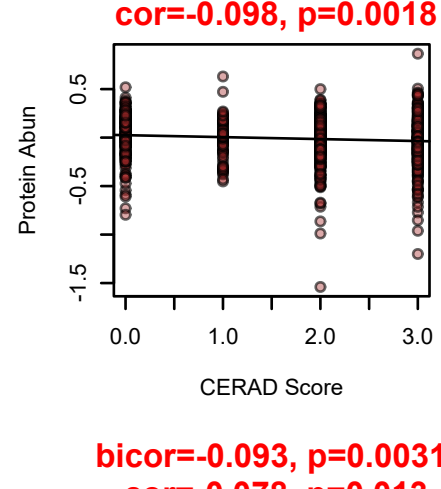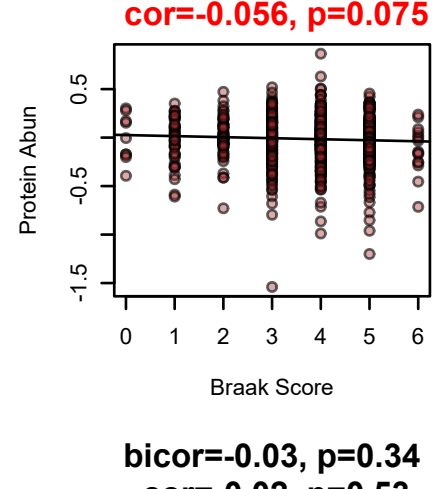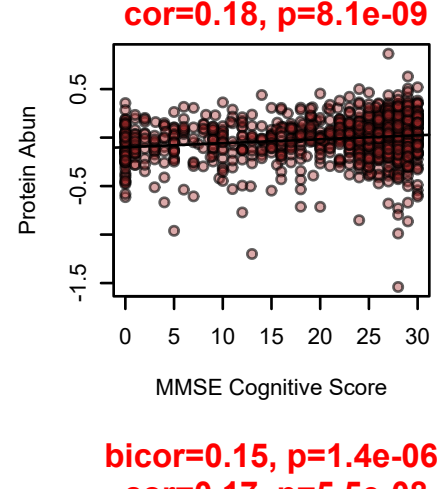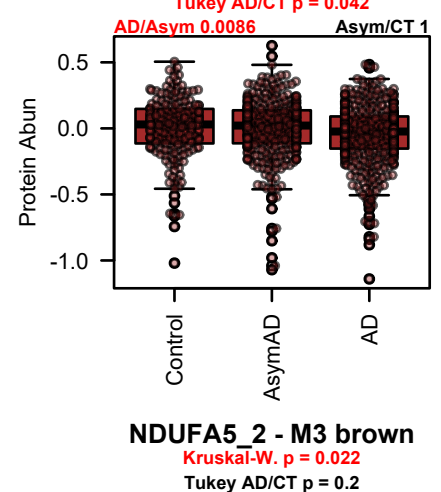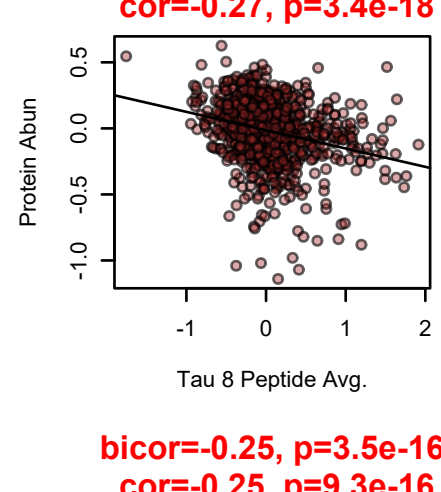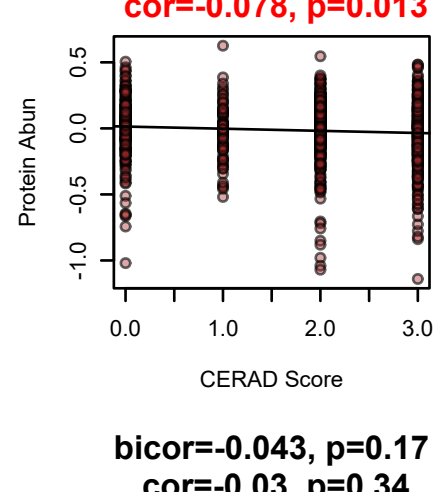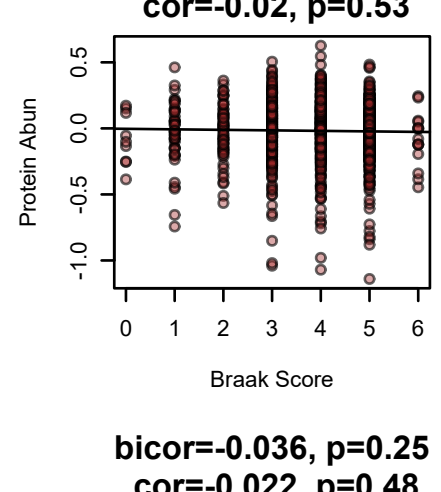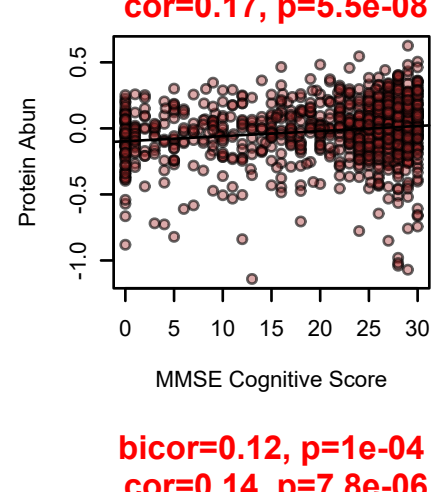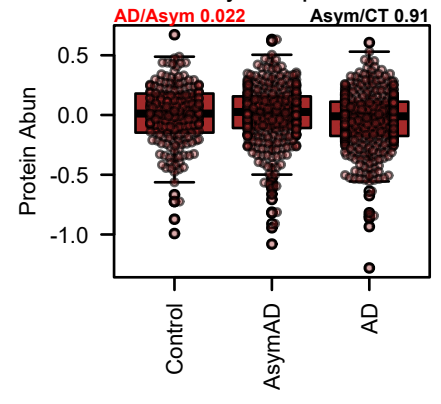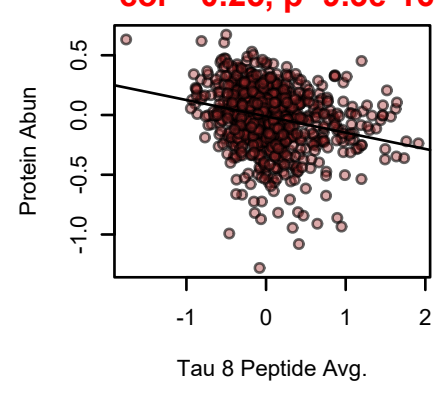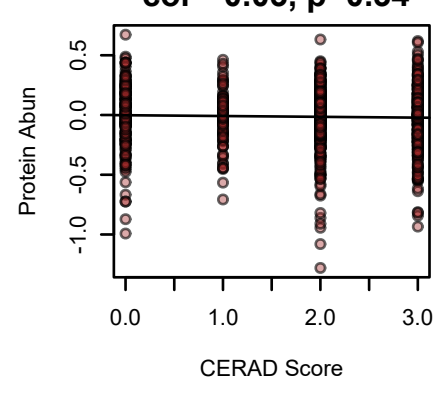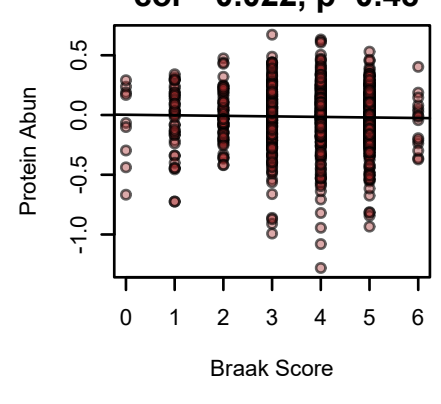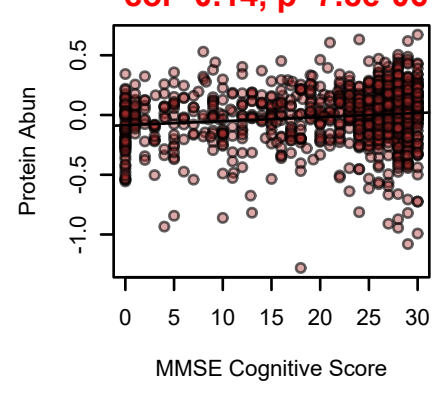



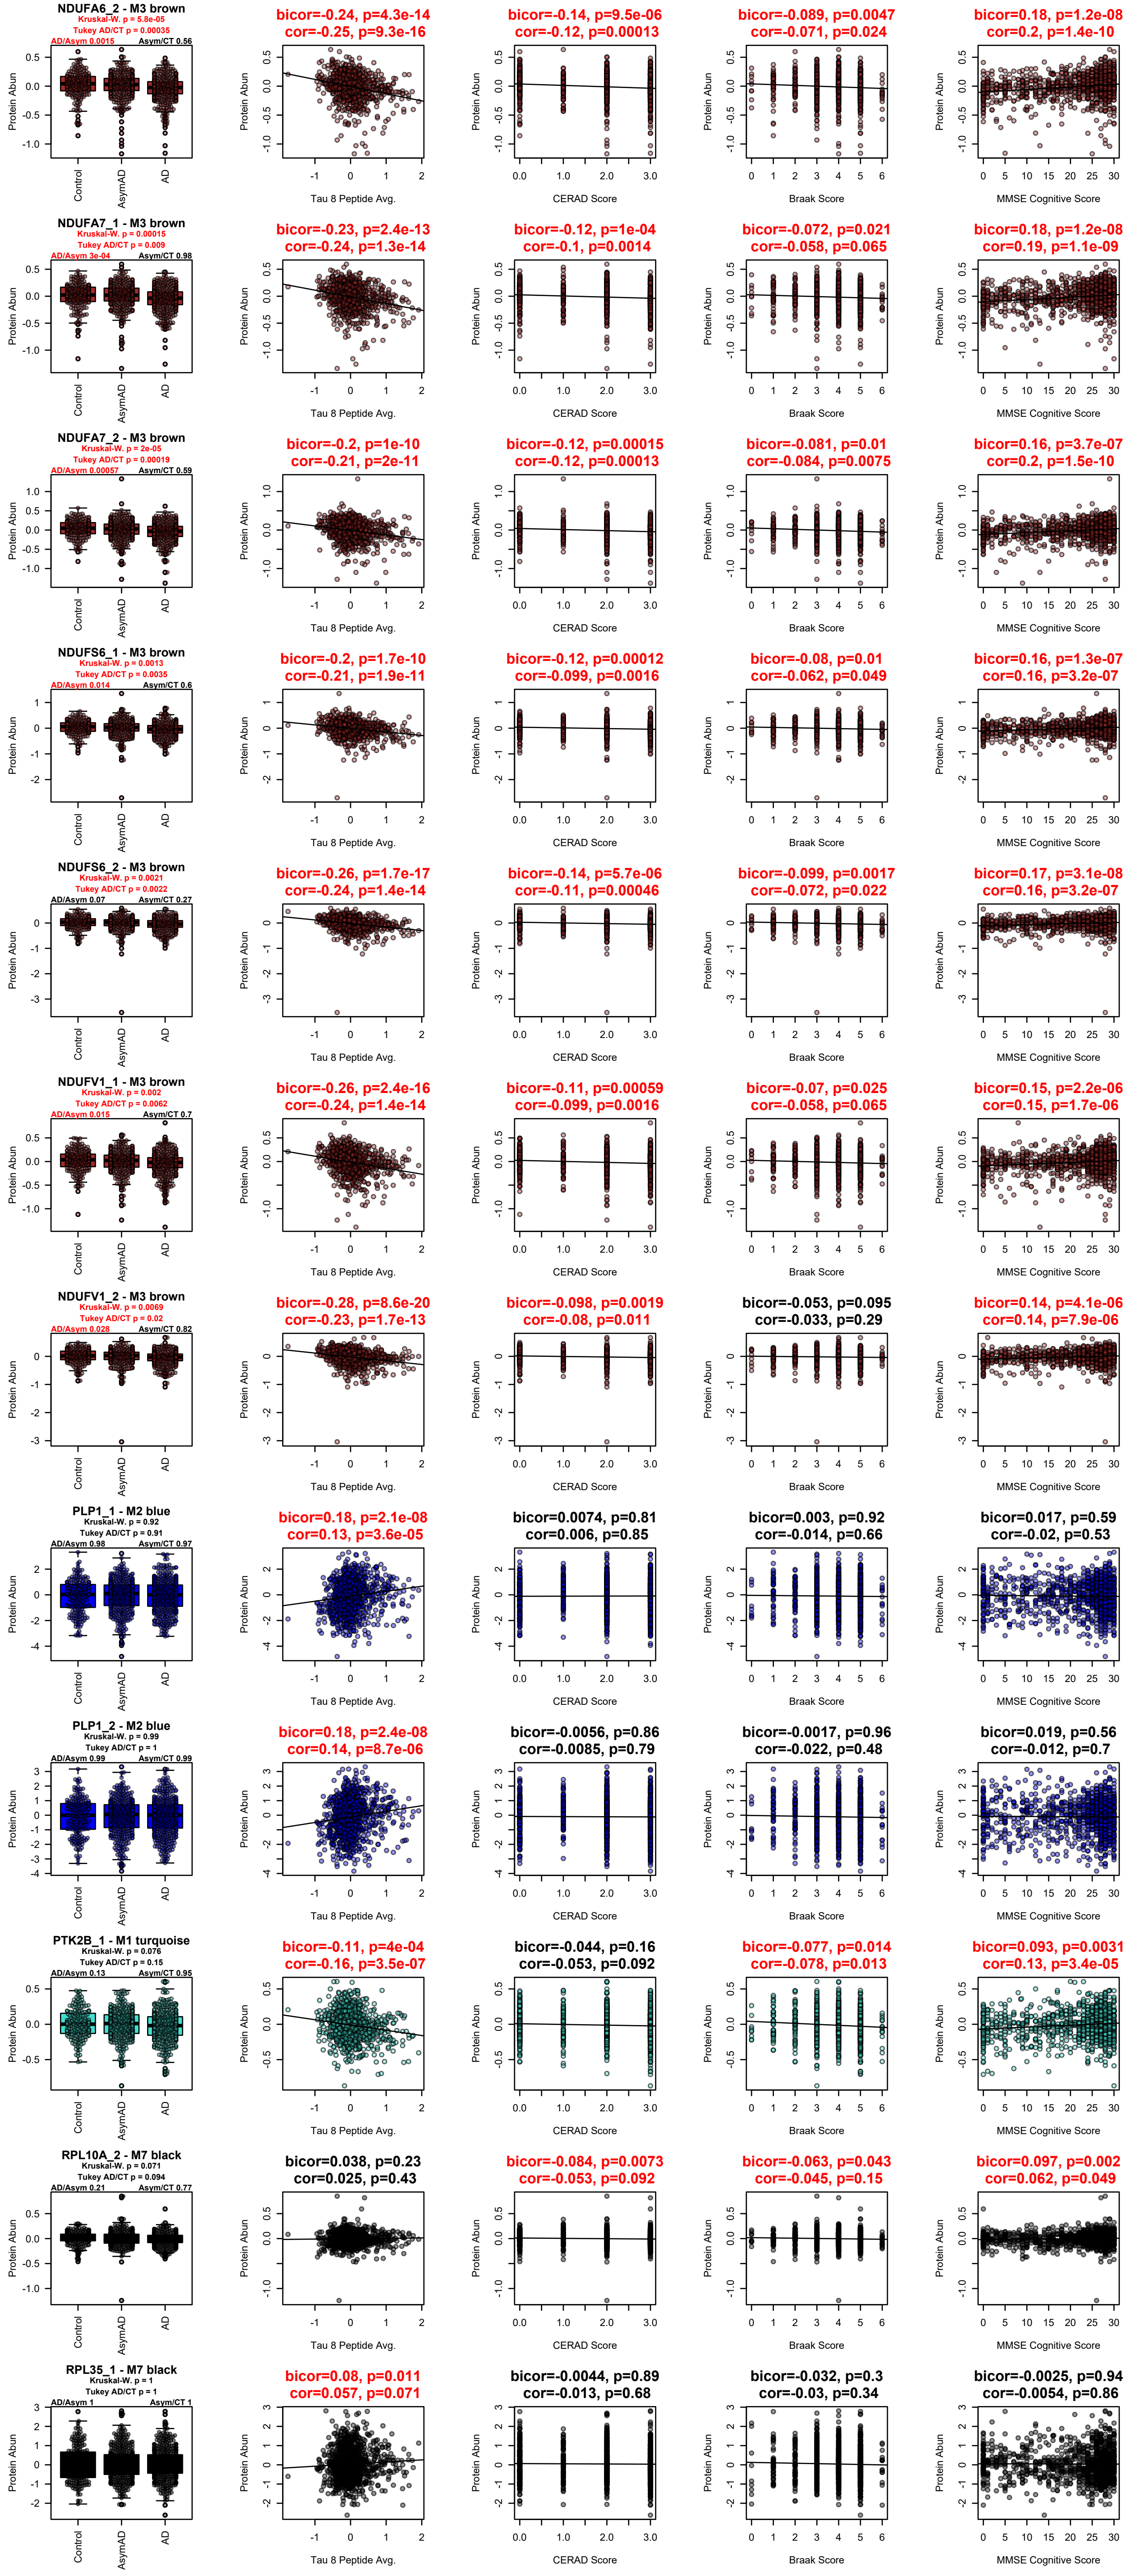



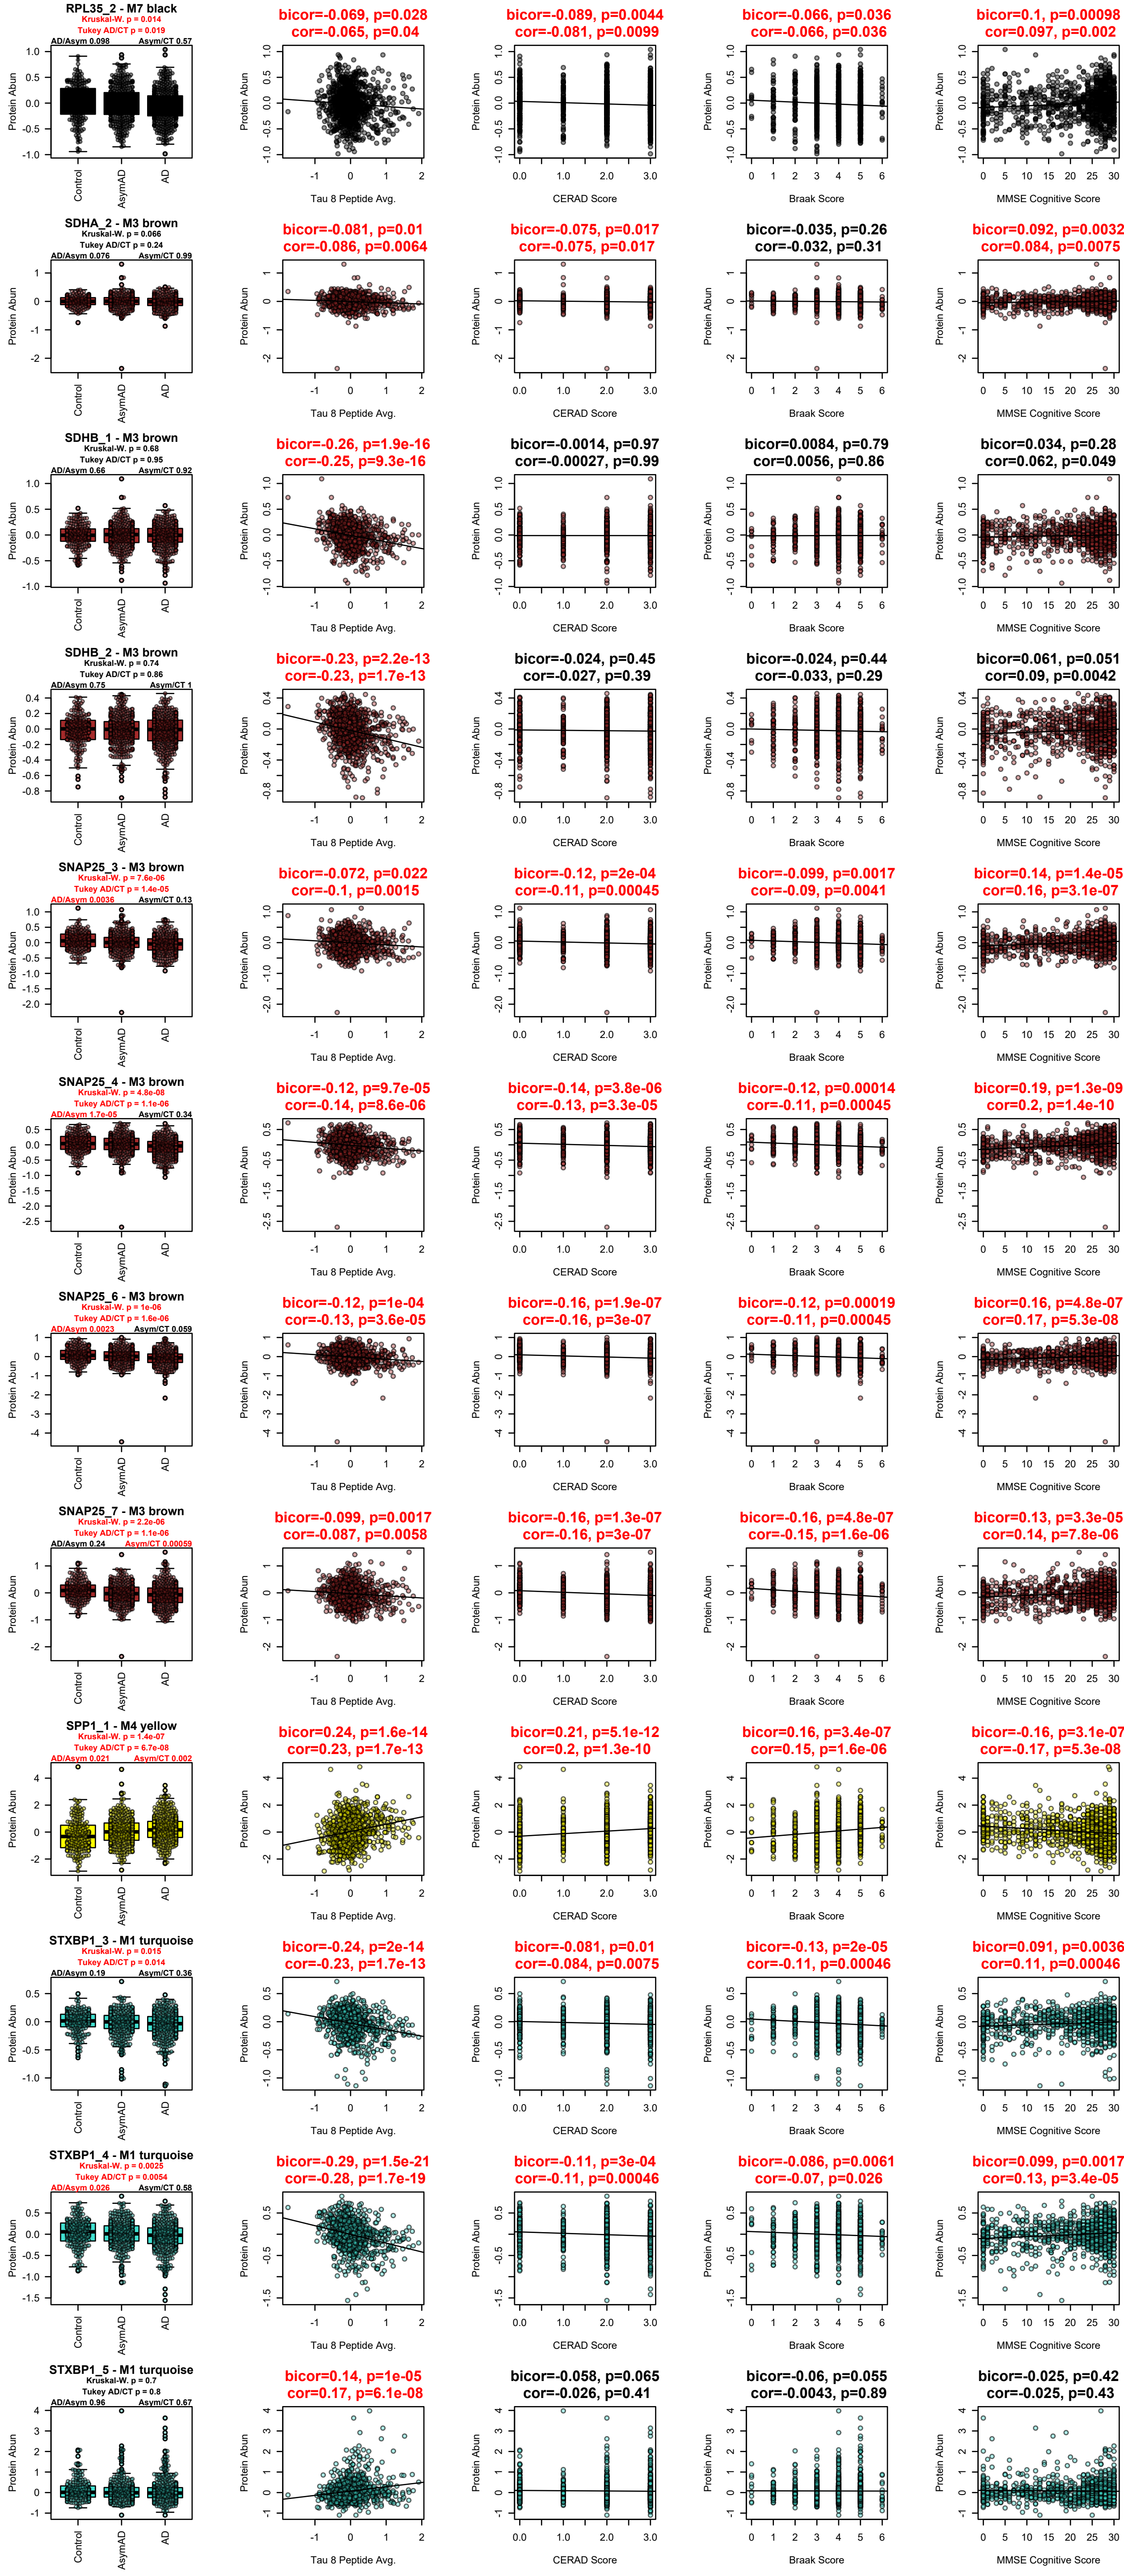



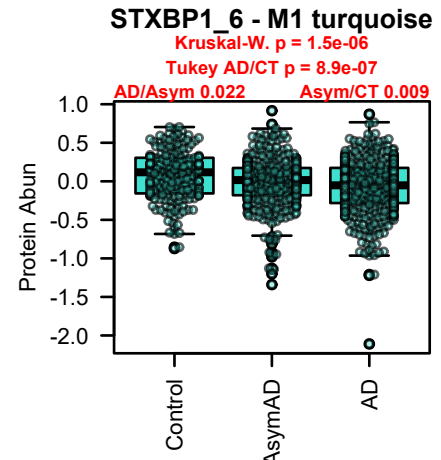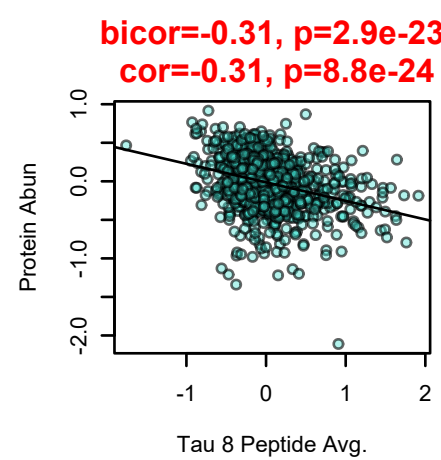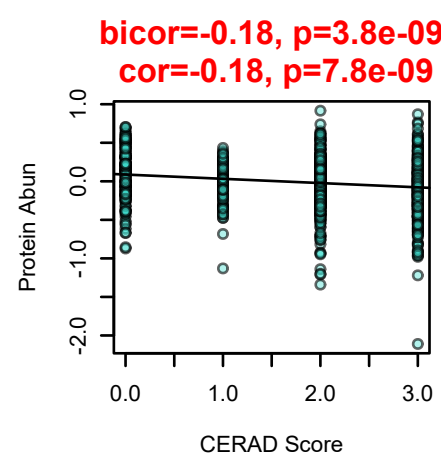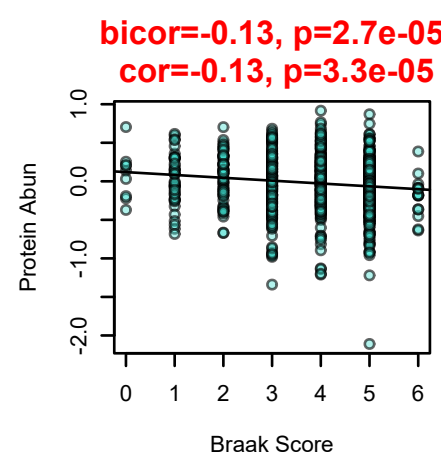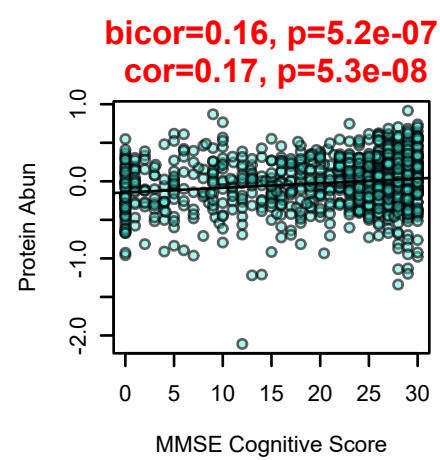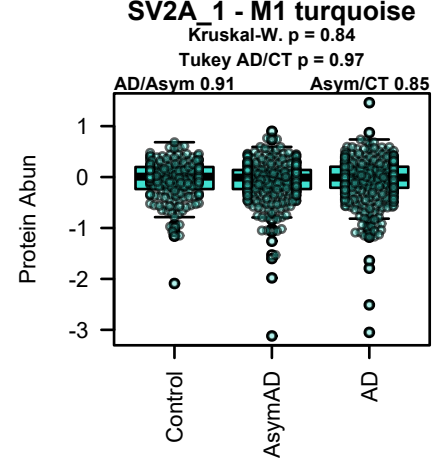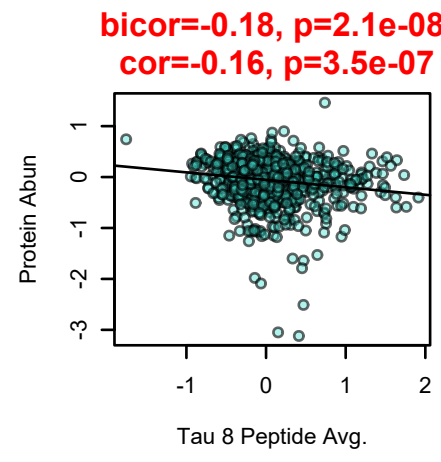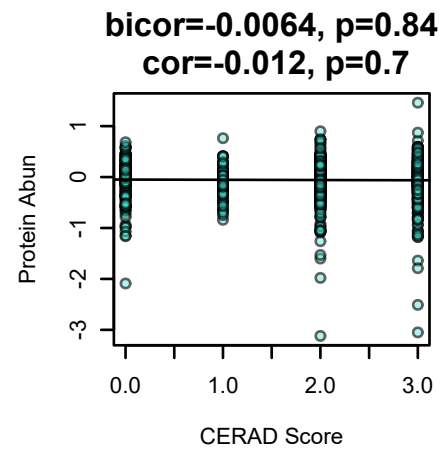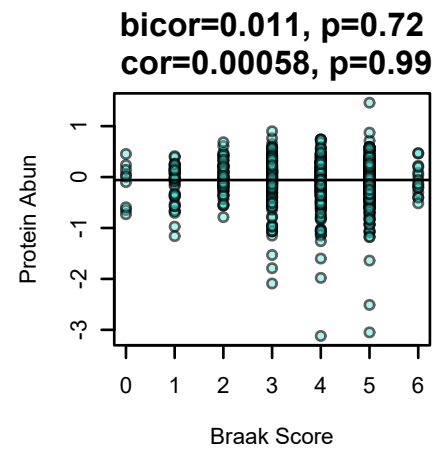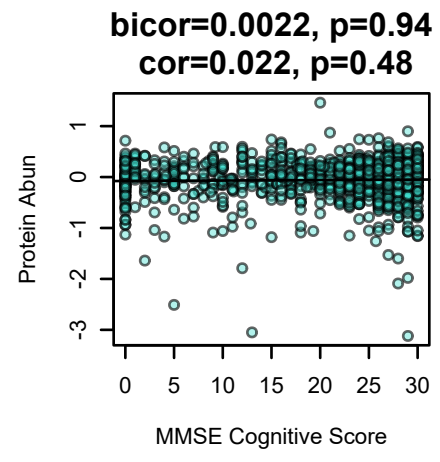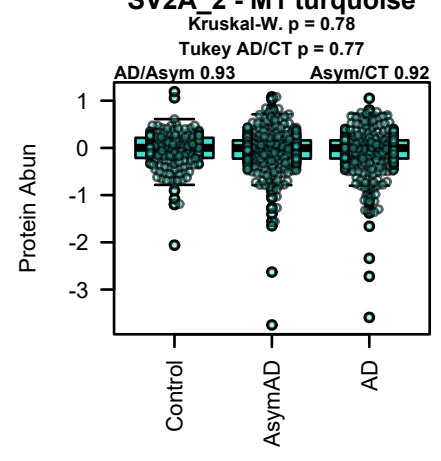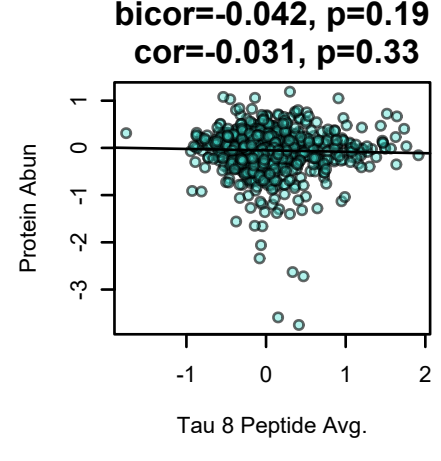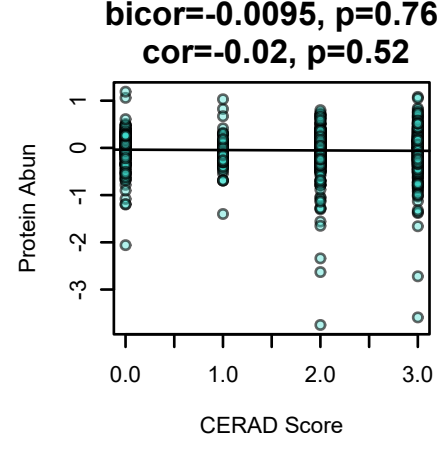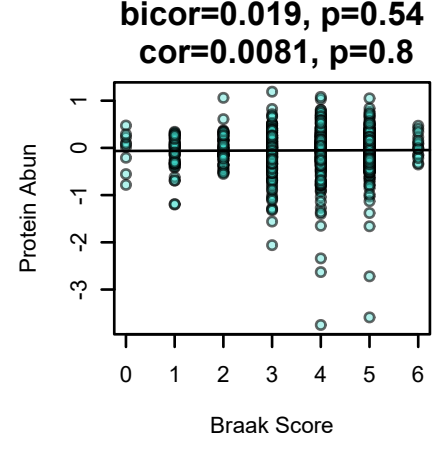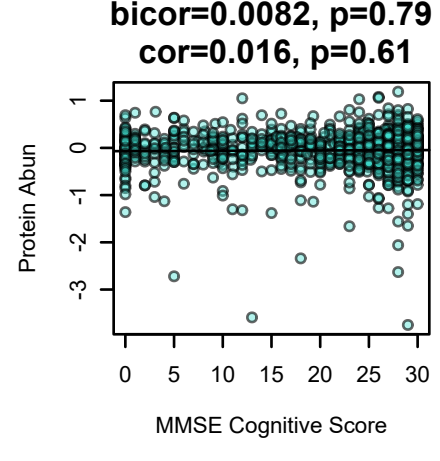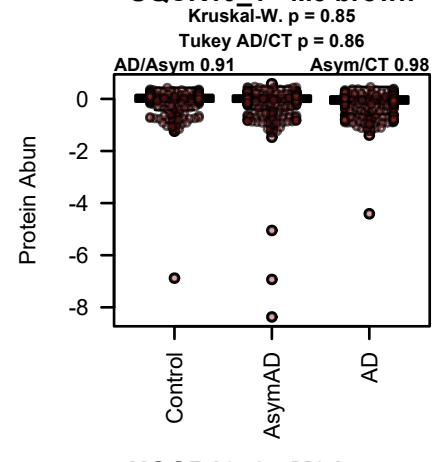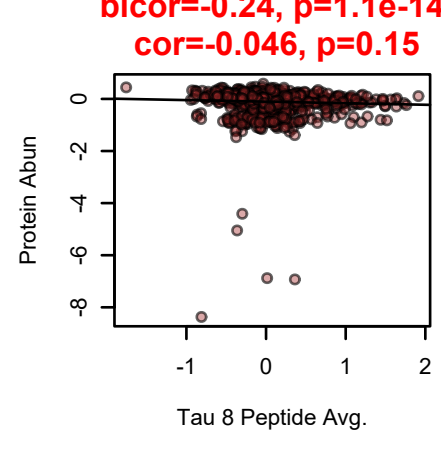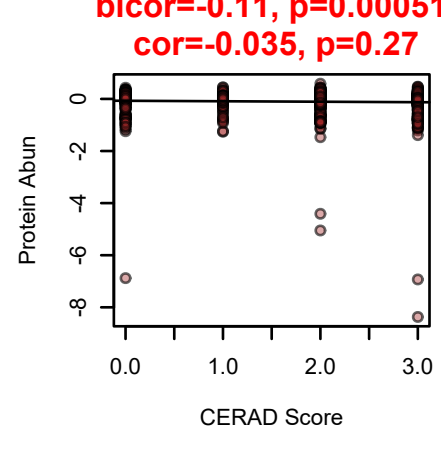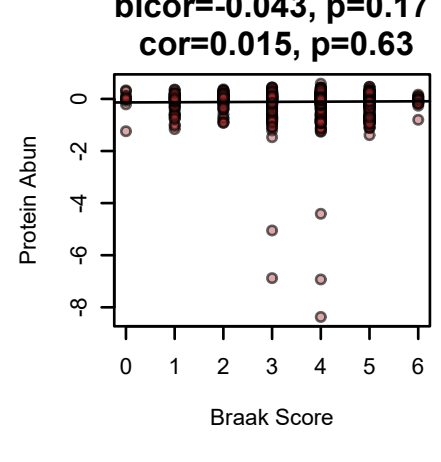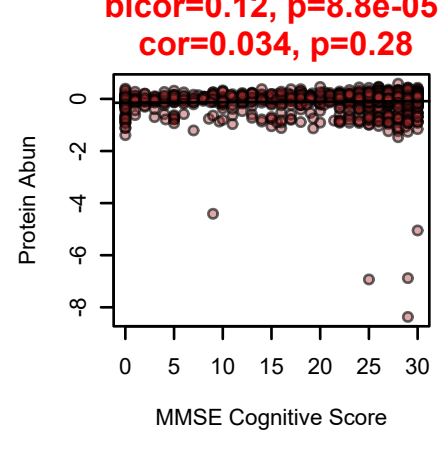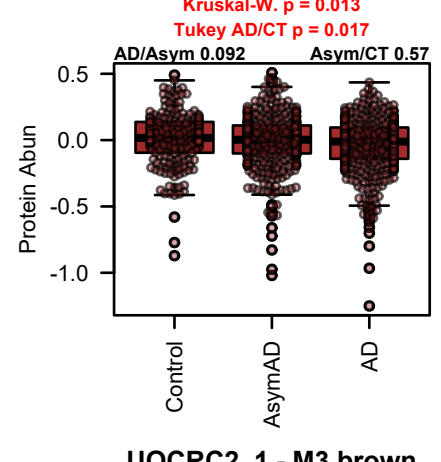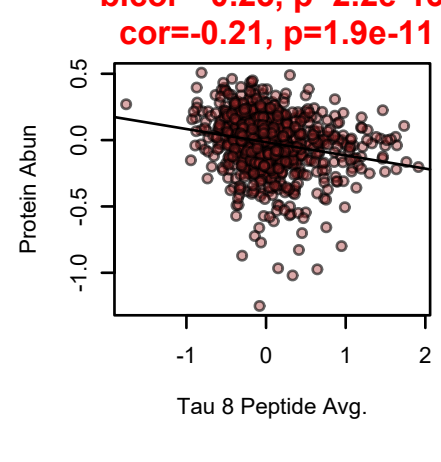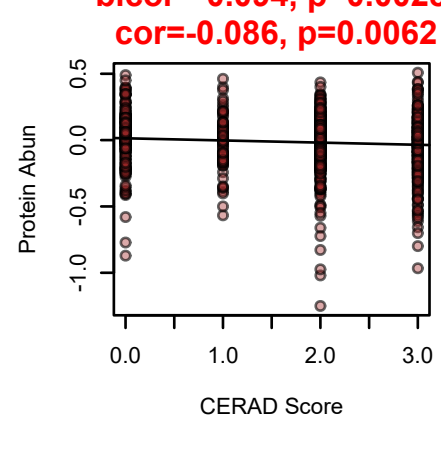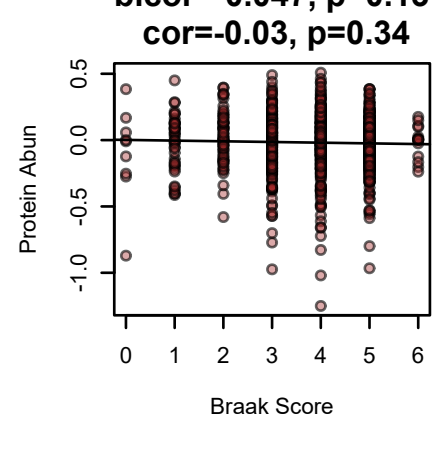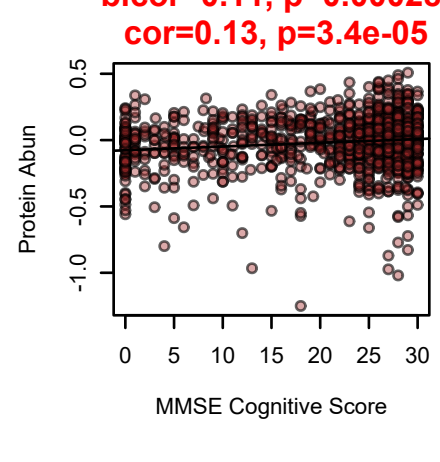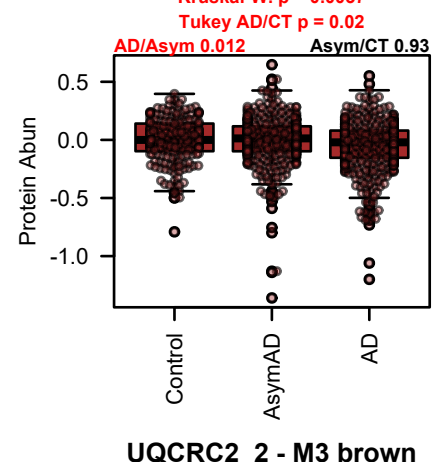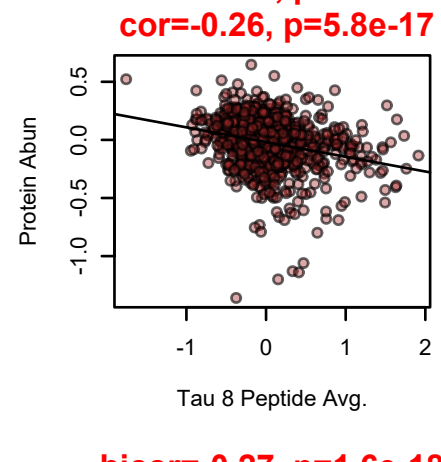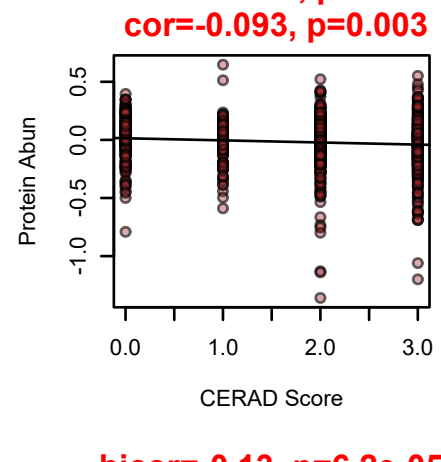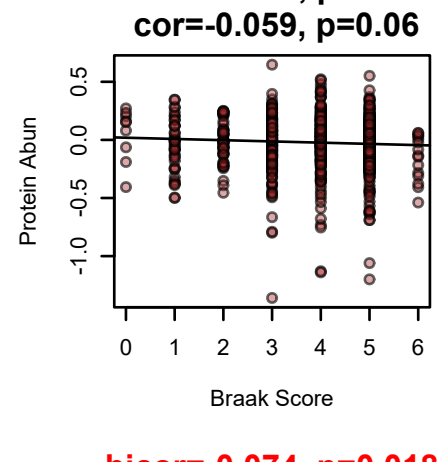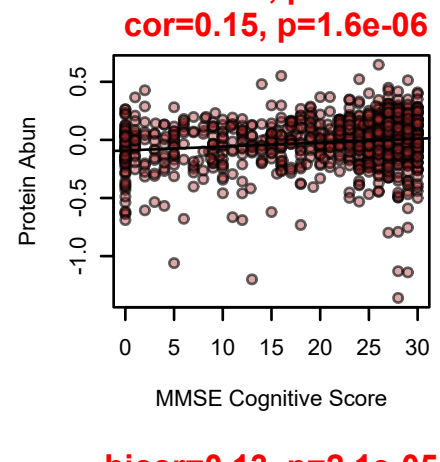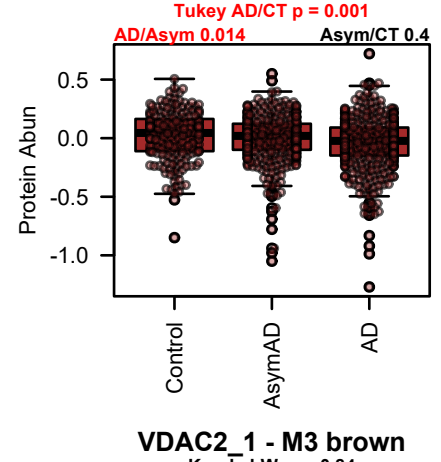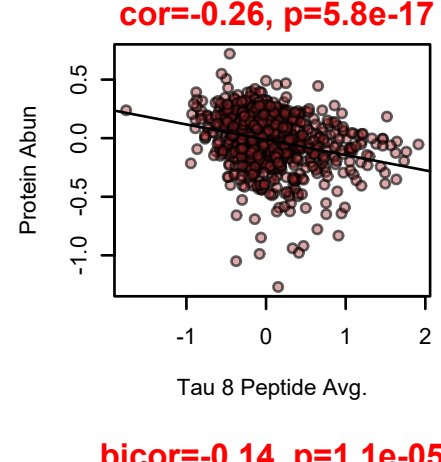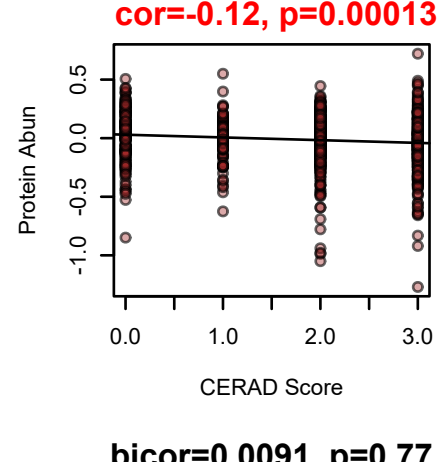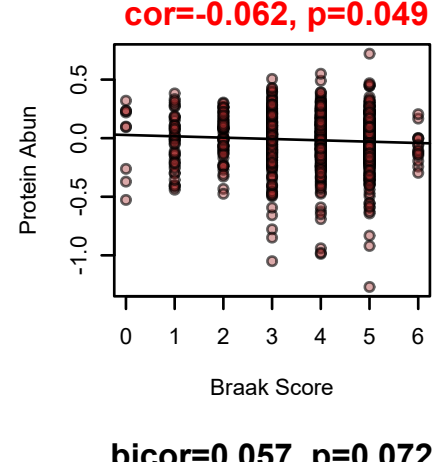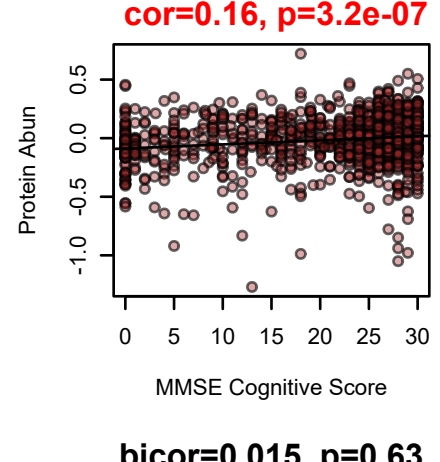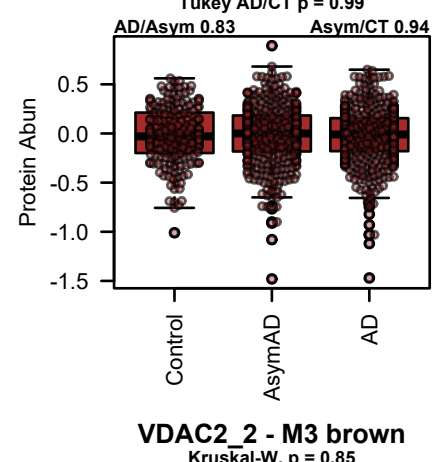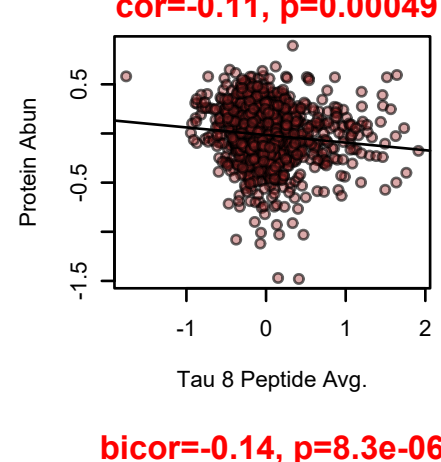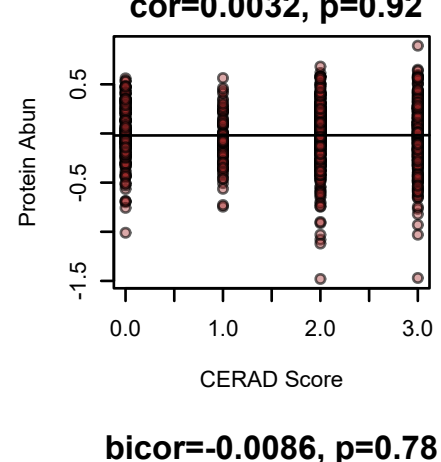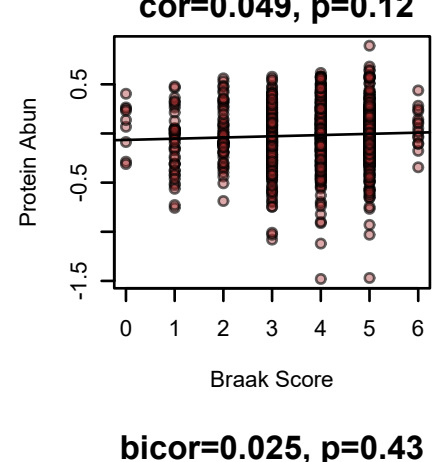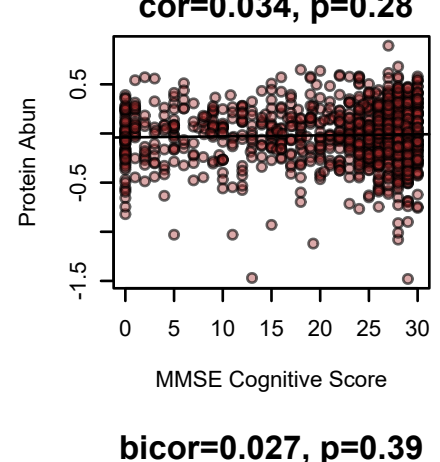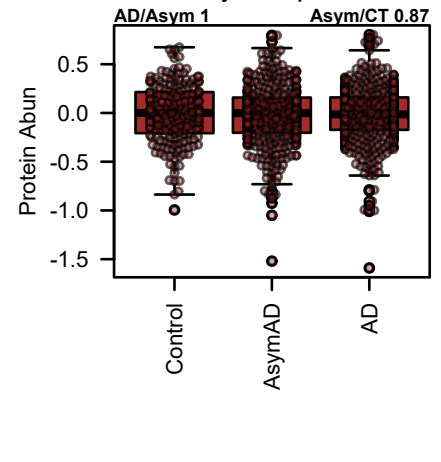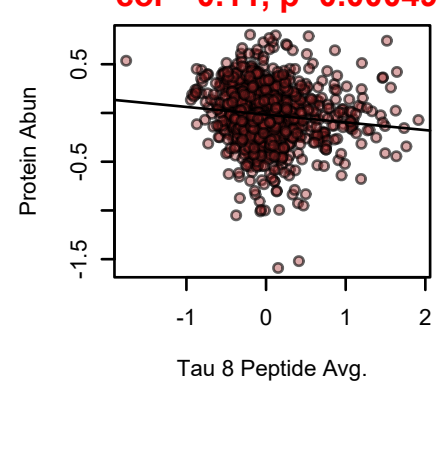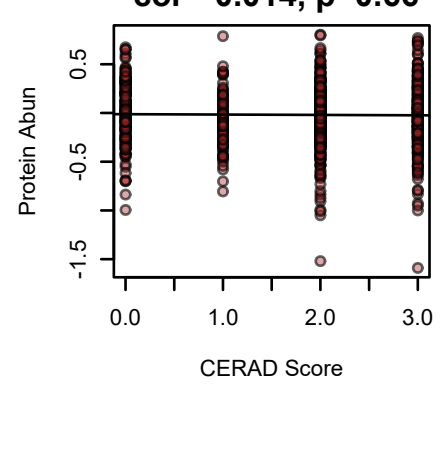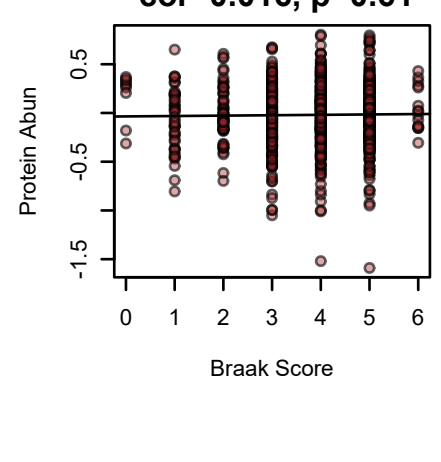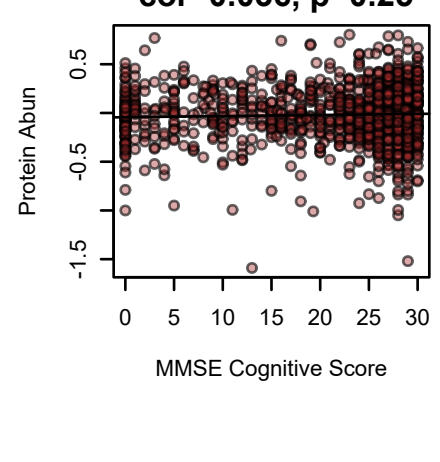



**M5 green.Consensus**

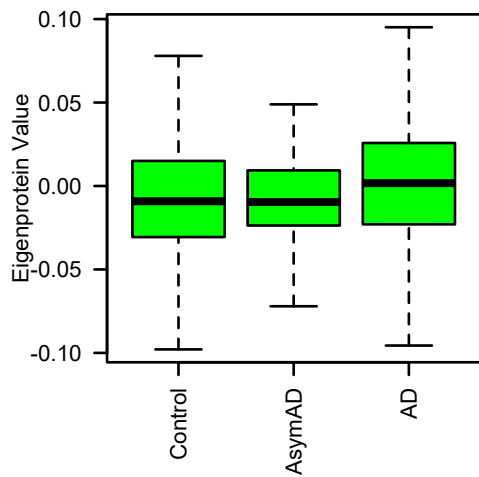

**M5 green.MayoTC (Synthetic)**  
K-W ANOVA p: 0.11

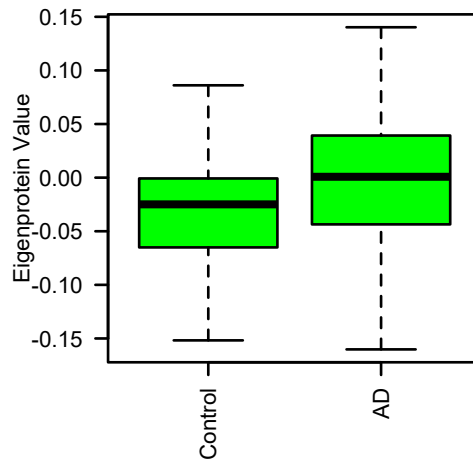

**bicor=0.26, p=0.0079**  
**cor=0.22, p=0.023**

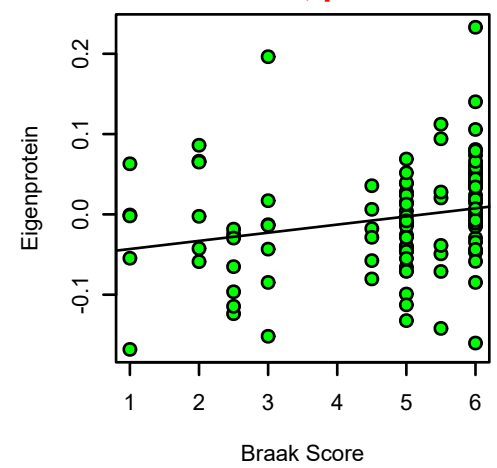

**M8 pink.Consensus**

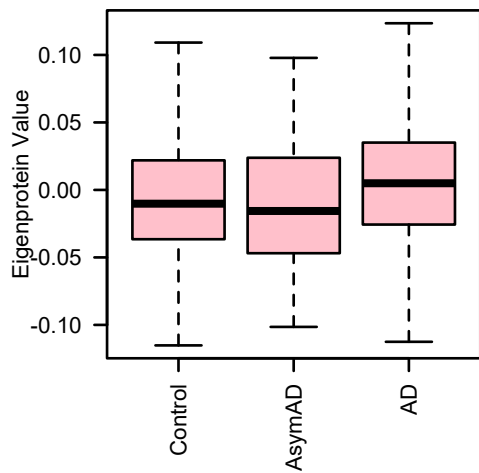

**M8 pink.MayoTC (Synthetic)**  
K-W ANOVA p: 0.15

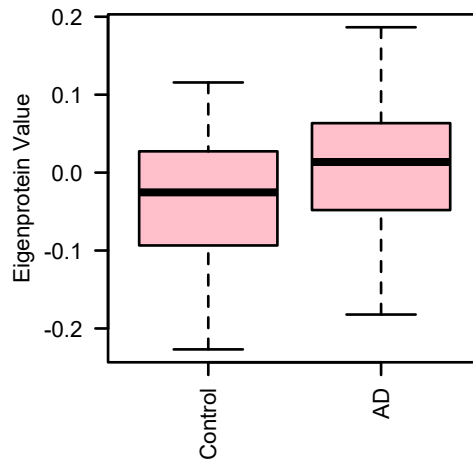

**bicor=0.23, p=0.016**  
**cor=0.2, p=0.039**

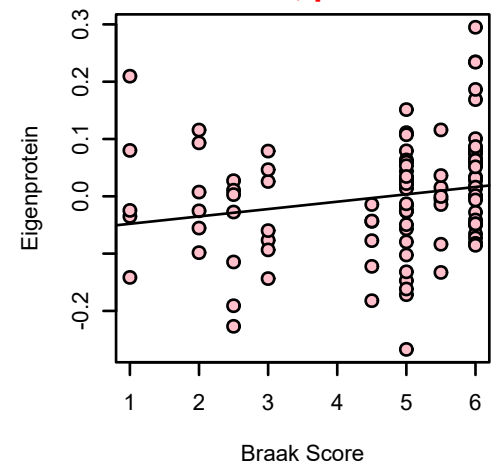

**M10 purple.Consensus**

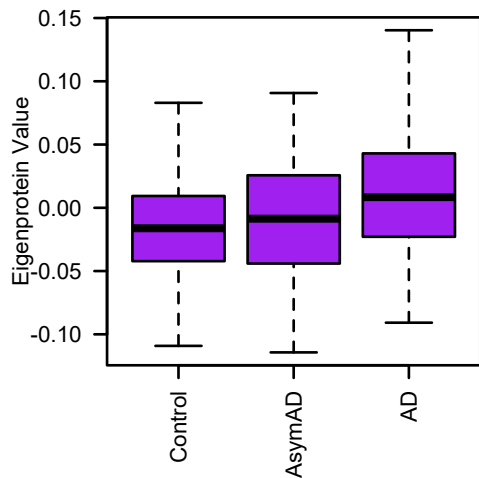

**M10 purple.MayoTC (Synthetic)**  
K-W ANOVA p: 0.038

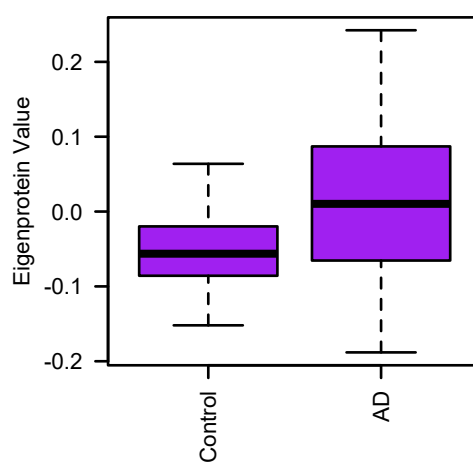

**bicor=0.29, p=0.0028**  
**cor=0.26, p=0.0068**

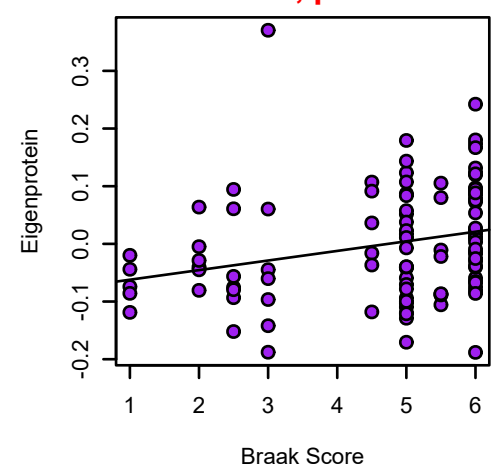

**M2 blue.Consensus**

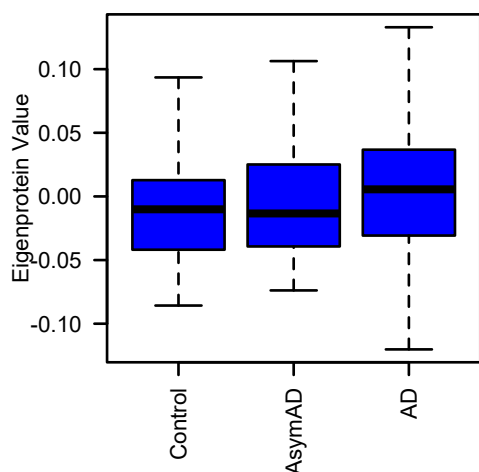

**M2 blue.MayoTC (Synthetic)**  
K-W ANOVA p: 0.44

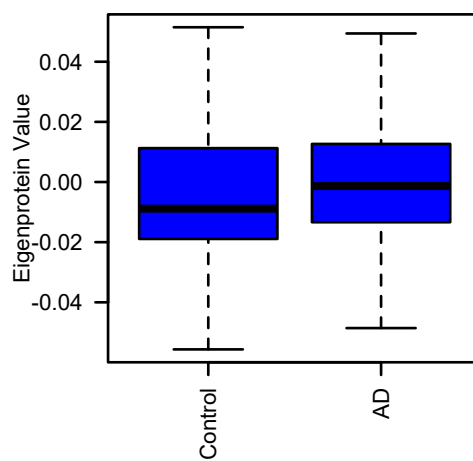

**bicor=0.091, p=0.35**  
**cor=0.11, p=0.26**

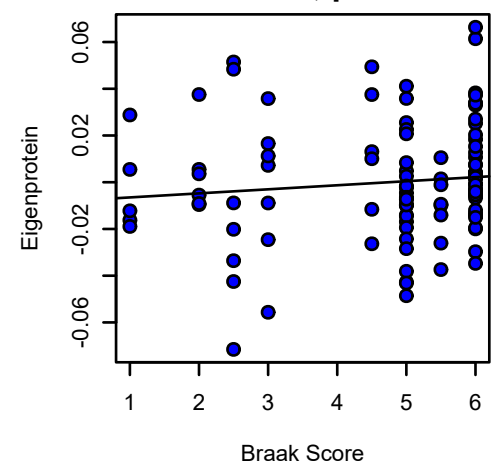

**M4 yellow.Consensus**

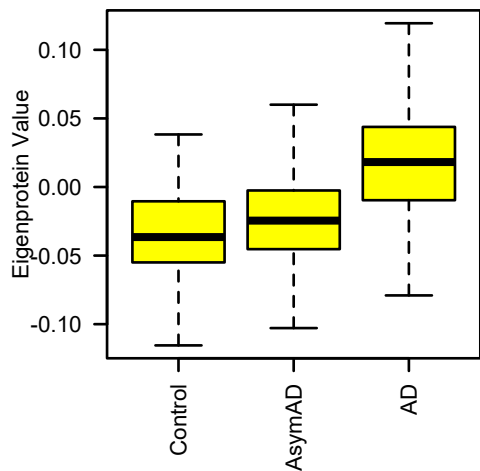

**M4 yellow.MayoTC (Synthetic)**  
K-W ANOVA p: 0.0011

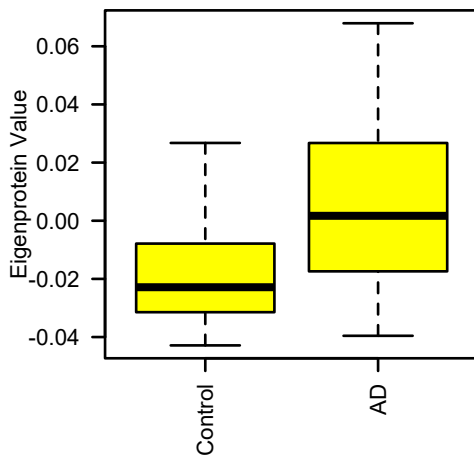

**bicor=0.45, p=1.5e-06**  
**cor=0.39, p=3.3e-05**

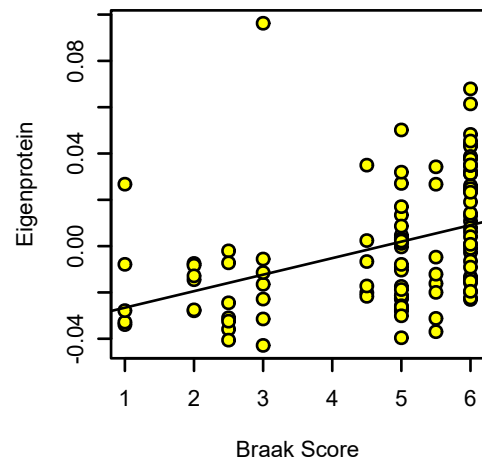

**M11 greenyellow.Consensus**

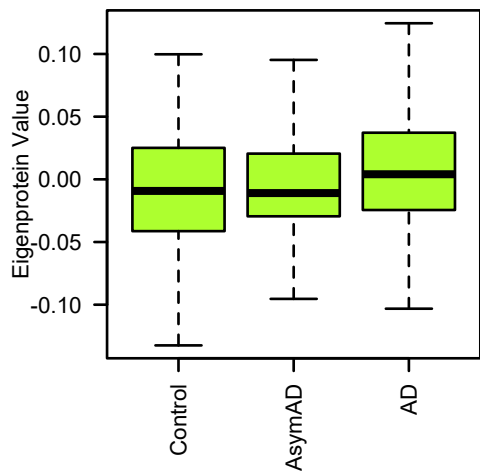

**M11 greenyellow.MayoTC (Synthetic)**  
K-W ANOVA p: 0.51

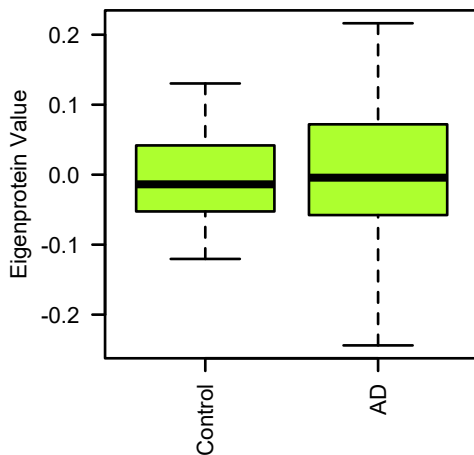

**bicor=0.016, p=0.87**  
**cor=0.039, p=0.69**

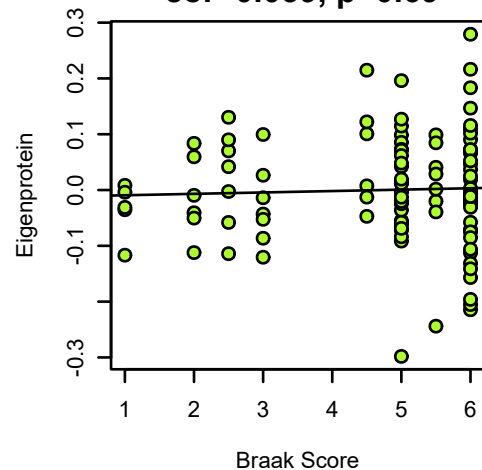

**M13 salmon.Consensus**

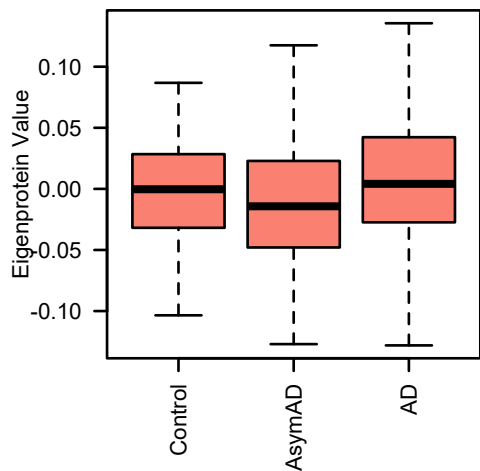

**M13 salmon.MayoTC (Synthetic)**  
K-W ANOVA p: 0.27

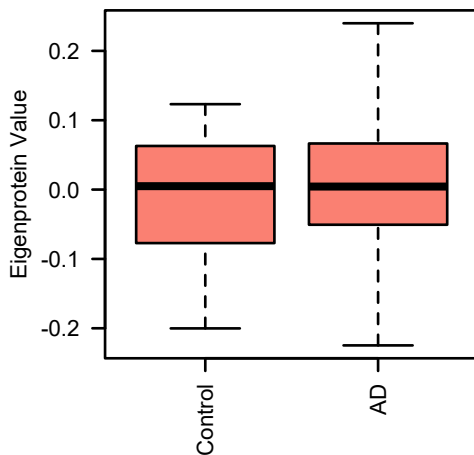

**bicor=0.044, p=0.65**  
**cor=0.065, p=0.51**

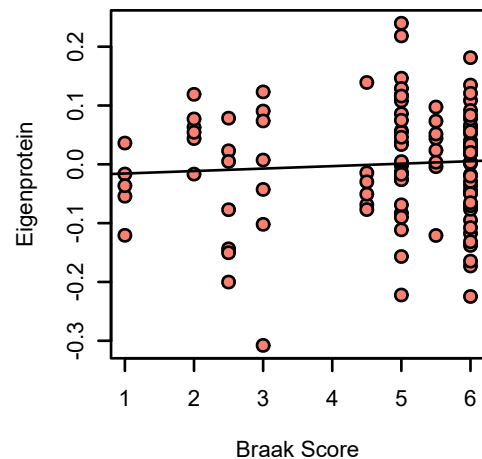

**M3 brown.Consensus**

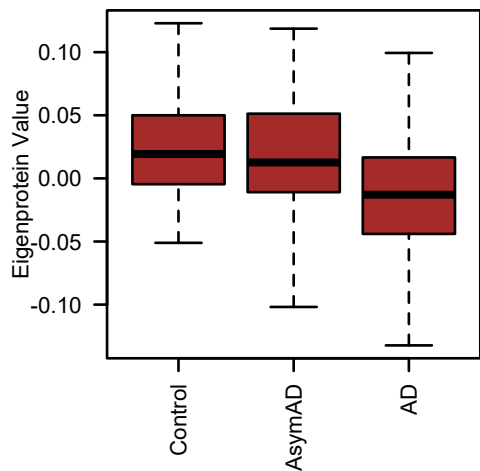

**M3 brown.MayoTC (Synthetic)**  
K-W ANOVA p: 0.0013

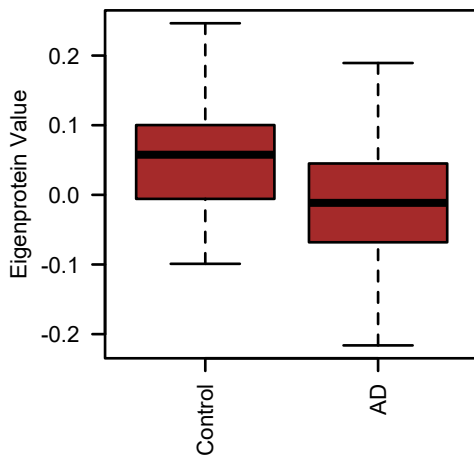

**bicor=-0.39, p=3.4e-05**  
**cor=-0.38, p=5.4e-05**

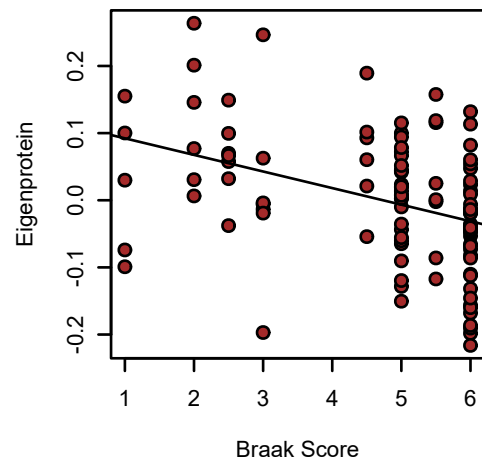

**M6 red.Consensus**

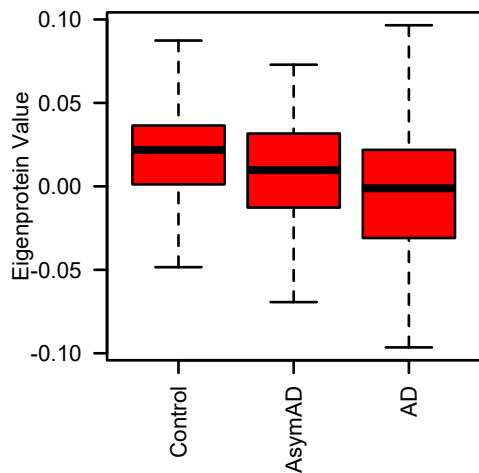

**M6 red.MayoTC (Synthetic)**  
K-W ANOVA p: 0.87

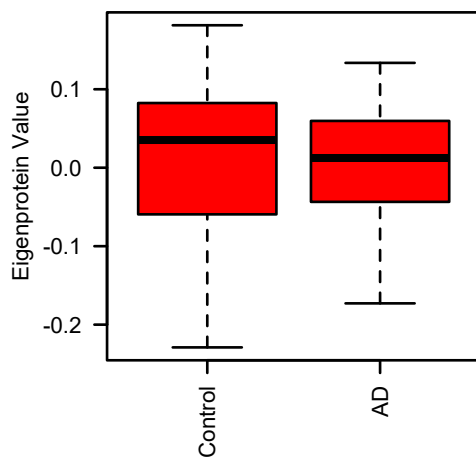

**bicor=-0.13, p=0.17**  
**cor=-0.05, p=0.61**

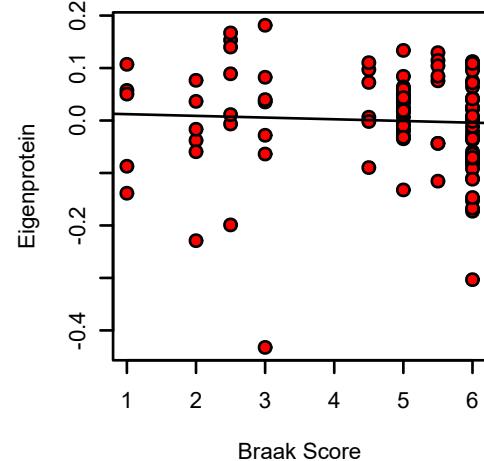

**M1 turquoise.Consensus**

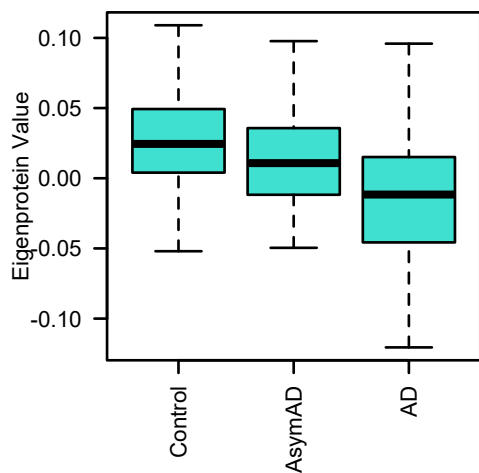

**M1 turquoise.MayoTC (Synthetic)**  
K-W ANOVA p: 0.029

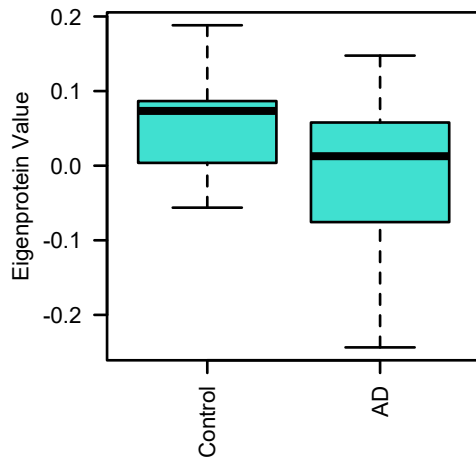

**bicor=-0.3, p=0.0015**  
**cor=-0.3, p=0.0017**

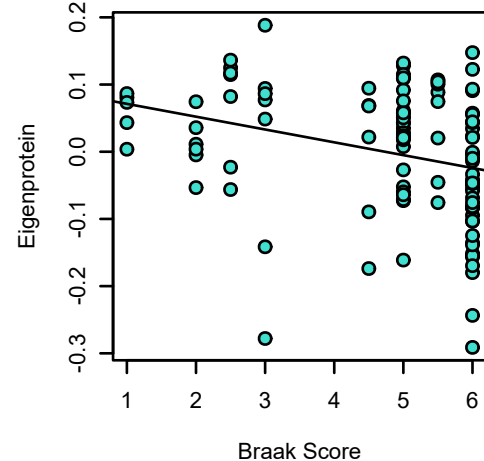

**M12 tan.Consensus**

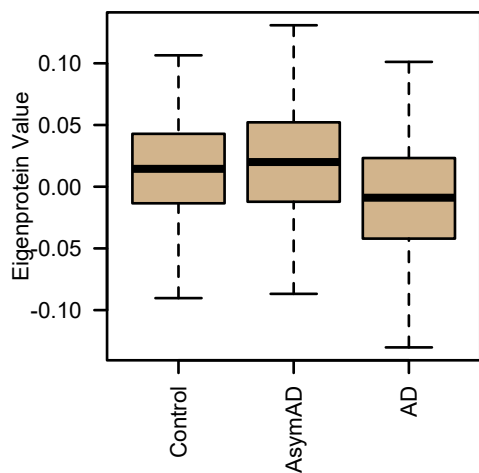

**M12 tan.MayoTC (Synthetic)**  
K-W ANOVA p: 0.011

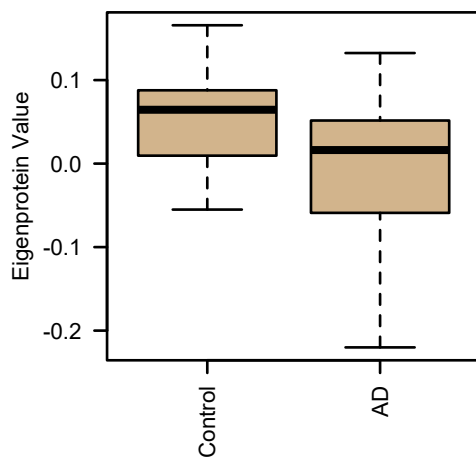

**bicor=-0.27, p=0.0054**  
**cor=-0.22, p=0.023**

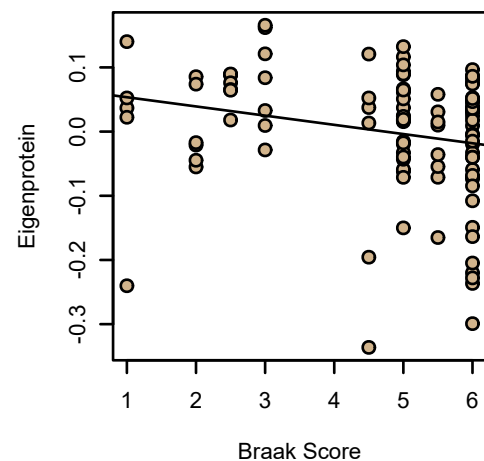

**M7 black.Consensus**

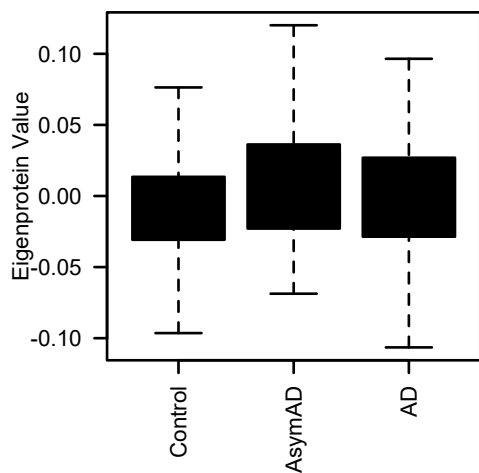

**M7 black.MayoTC (Synthetic)**  
K-W ANOVA p: 0.58

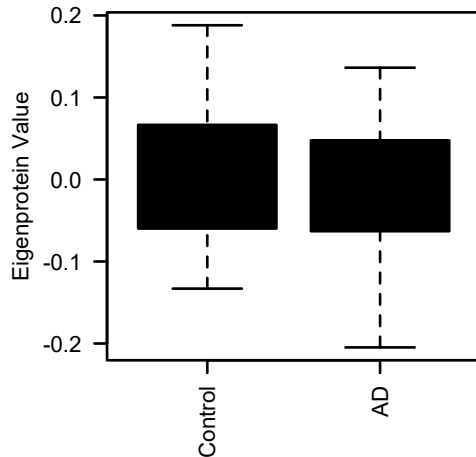

**bicor=-0.13, p=0.18**  
**cor=-0.097, p=0.32**

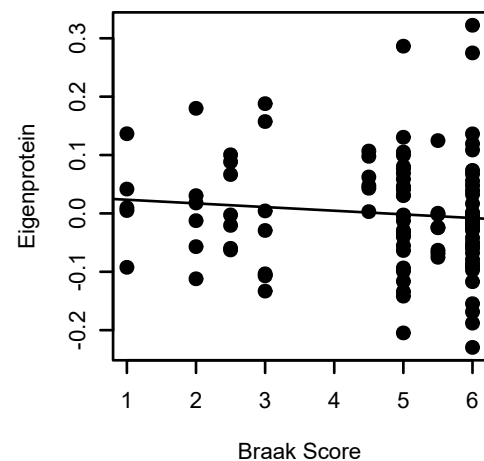

**M9 magenta.Consensus**

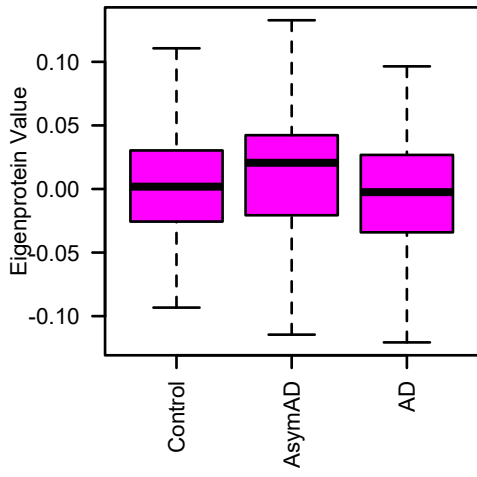

**M9 magenta.MayoTC (Synthetic)**  
K-W ANOVA p: 0.9

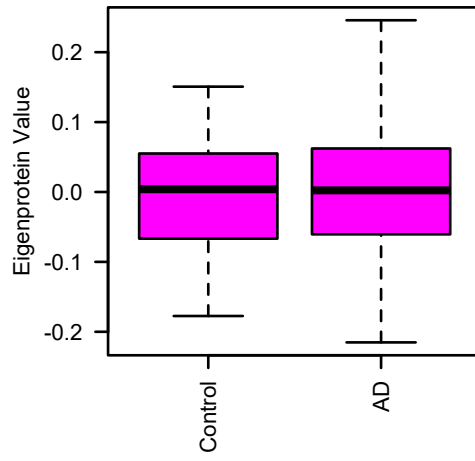

**bicor=0.036, p=0.72**  
**cor=0.029, p=0.77**

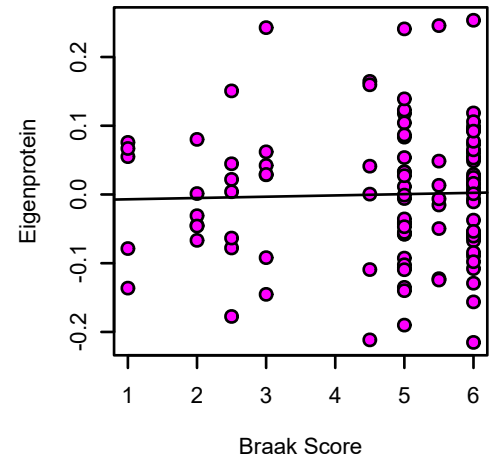



**M5 green.Consensus**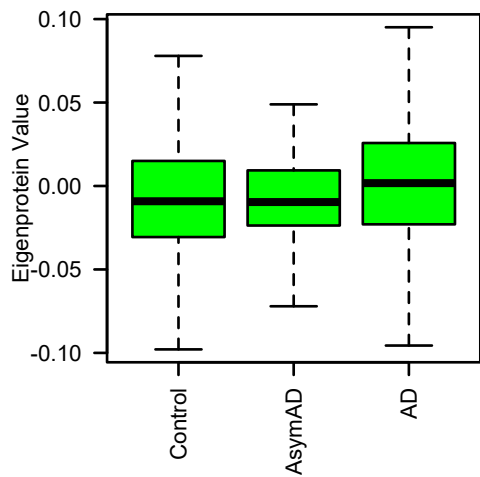**M5 green.BLSApc (Synthetic)**  
K-W ANOVA p: 0.41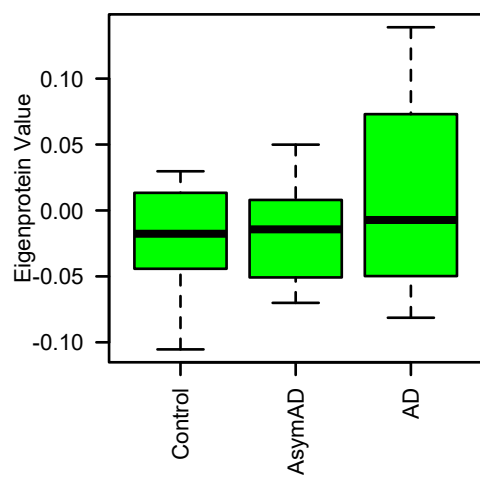**bicor=0.12, p=0.42**  
**cor=0.13, p=0.39**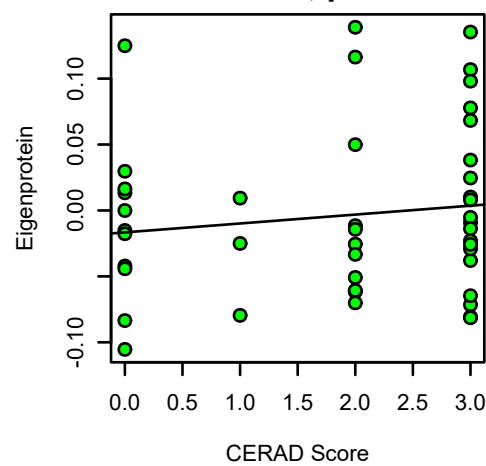**bicor=0.33, p=0.023**  
**cor=0.34, p=0.021**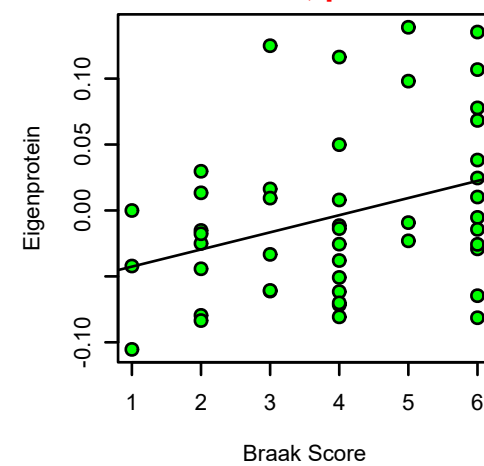**M8 pink.Consensus**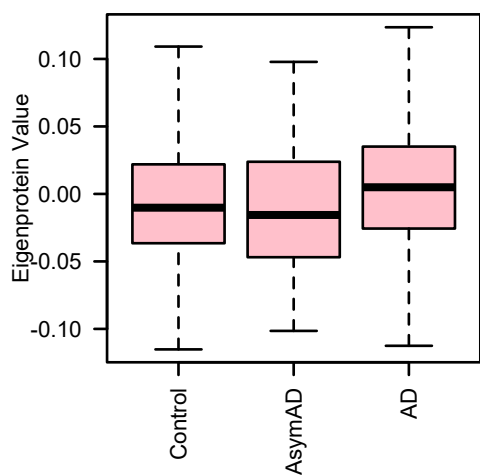**M8 pink.BLSApc (Synthetic)**  
K-W ANOVA p: 0.25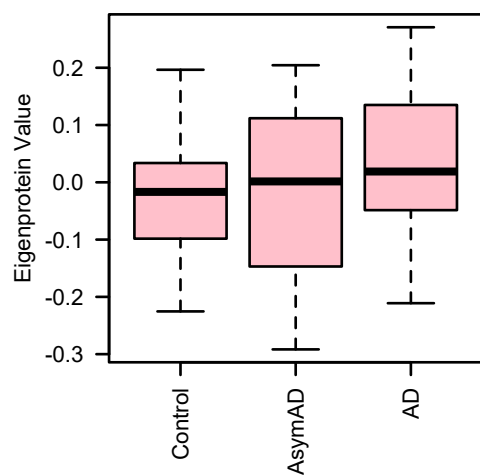**bicor=0.22, p=0.14**  
**cor=0.23, p=0.12**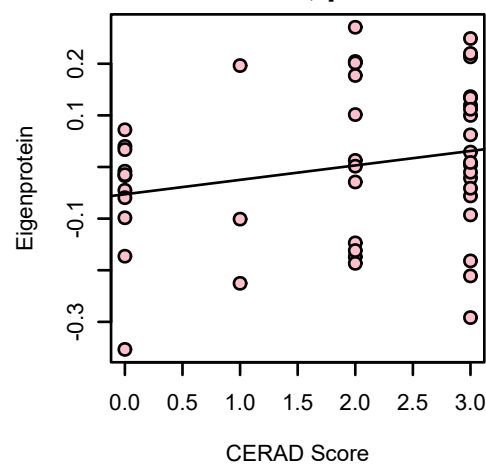**bicor=0.3, p=0.04**  
**cor=0.3, p=0.043**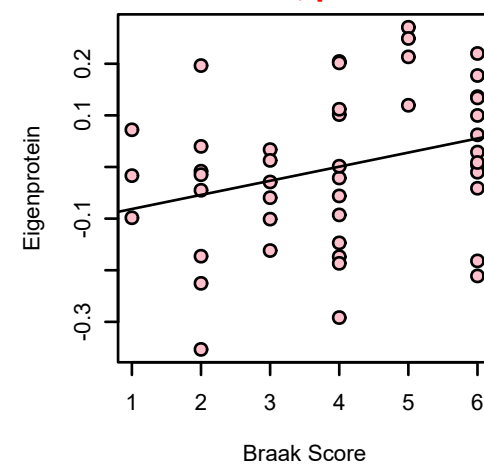**M10 purple.Consensus**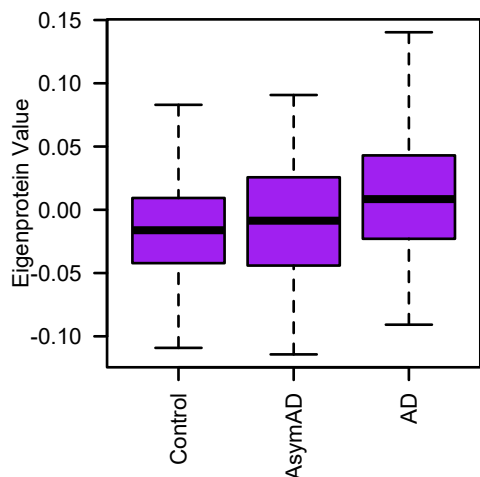**M10 purple.BLSApc (Synthetic)**  
K-W ANOVA p: 0.28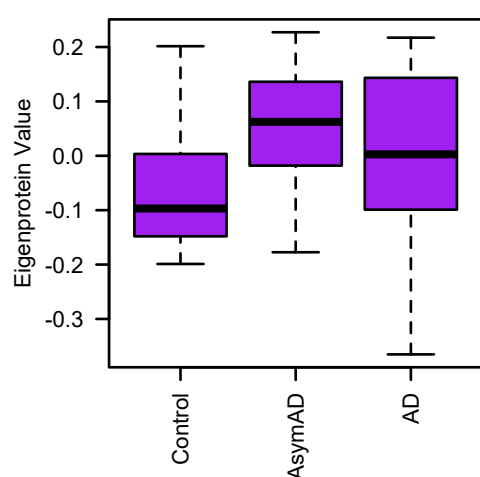**bicor=0.15, p=0.31**  
**cor=0.15, p=0.32**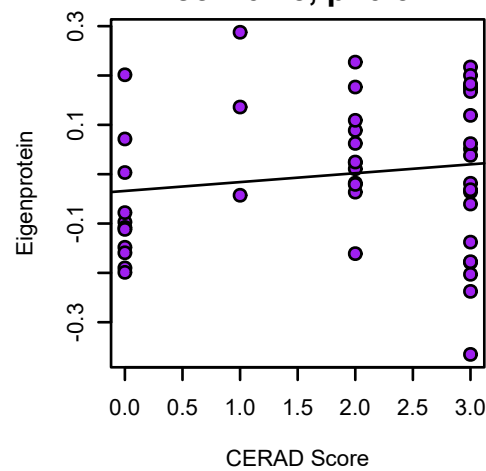**bicor=0.067, p=0.66**  
**cor=0.051, p=0.74**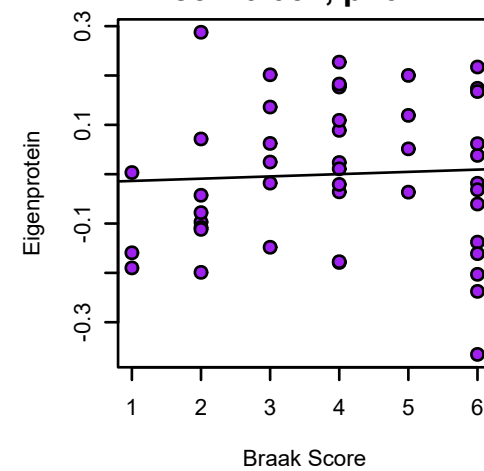**M2 blue.Consensus**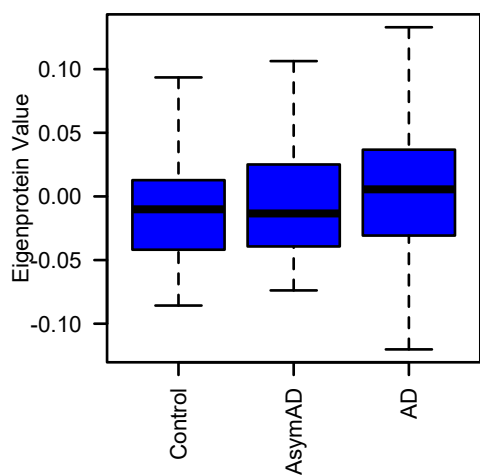**M2 blue.BLSApc (Synthetic)**  
K-W ANOVA p: 0.23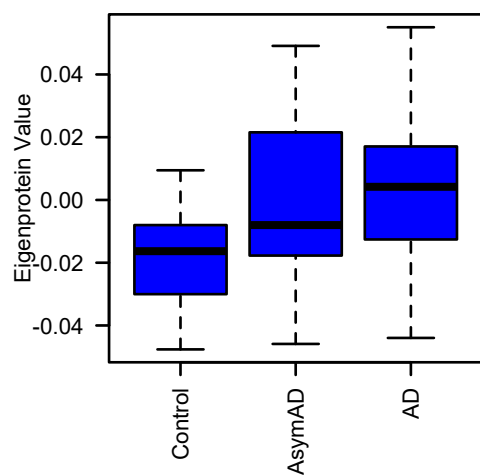**bicor=0.2, p=0.18**  
**cor=0.23, p=0.12**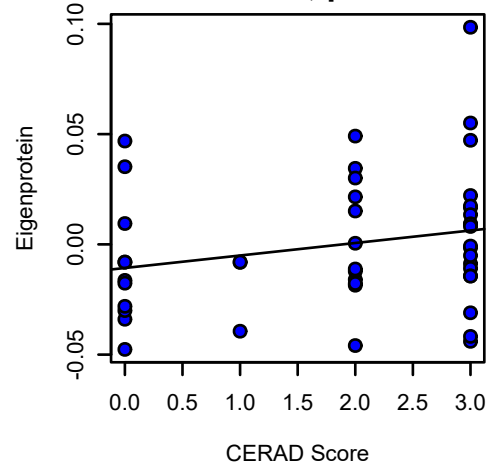**bicor=0.19, p=0.21**  
**cor=0.17, p=0.26**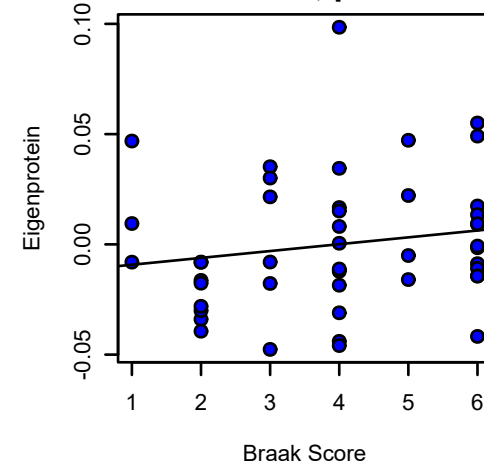

**M4 yellow.Consensus**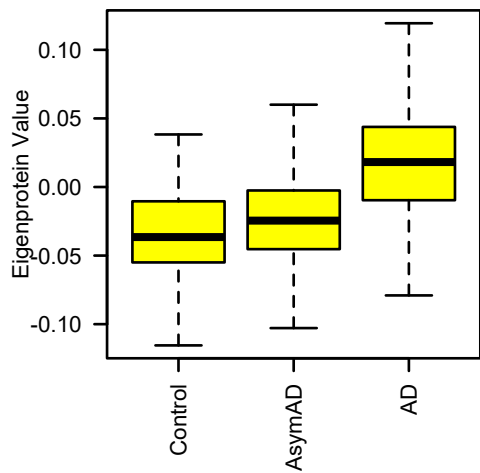**M4 yellow.BLSApc (Synthetic)**  
K-W ANOVA p: 3.1e-05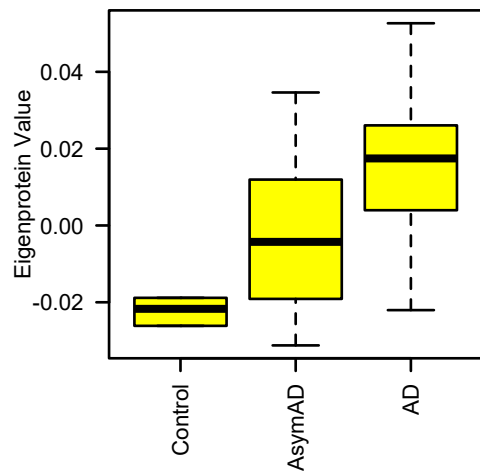**bicor=0.54, p=9.8e-05**  
**cor=0.54, p=0.00011**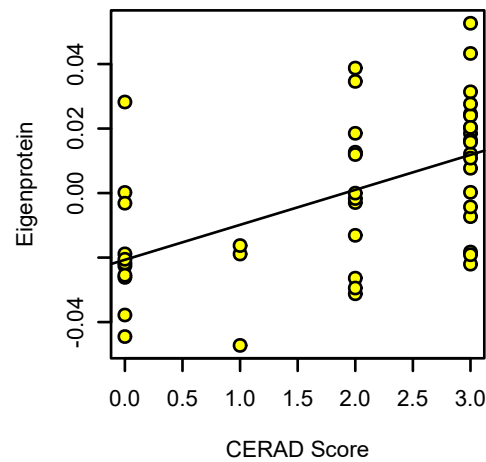**bicor=0.66, p=6.8e-07**  
**cor=0.65, p=1e-06**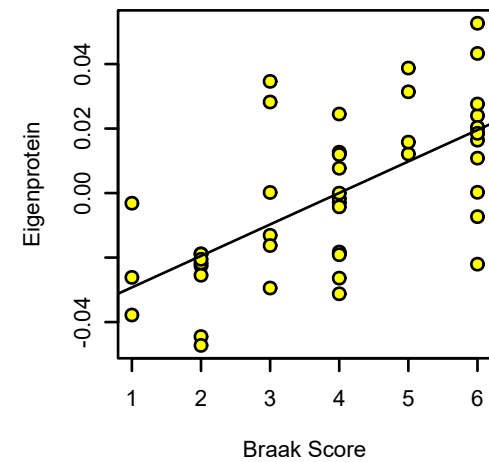**M11 greenyellow.Consensus**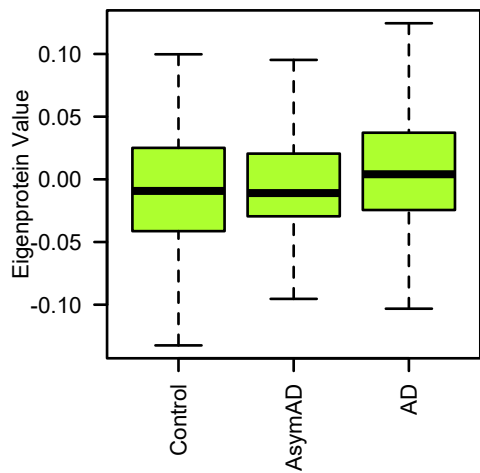**M11 greenyellow.BLSApc (Synthetic)**  
K-W ANOVA p: 0.74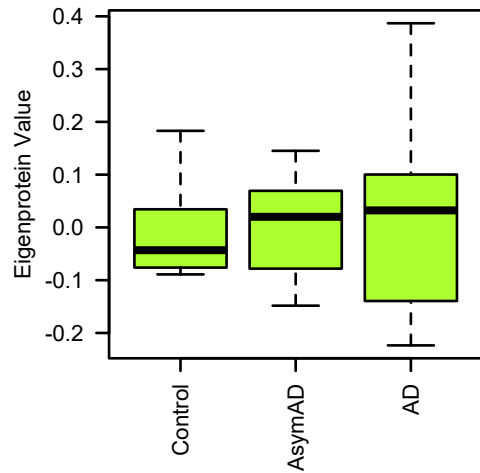**bicor=0.069, p=0.65**  
**cor=0.11, p=0.47**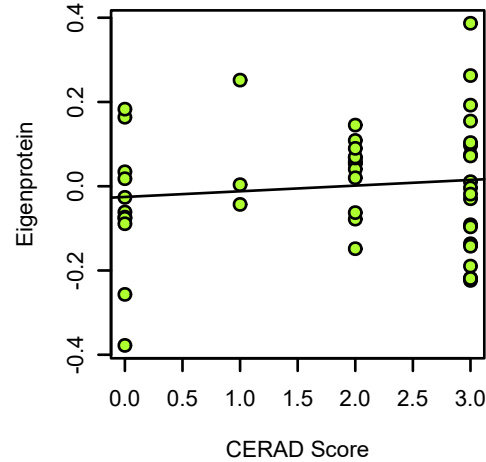**bicor=0.093, p=0.54**  
**cor=0.12, p=0.43**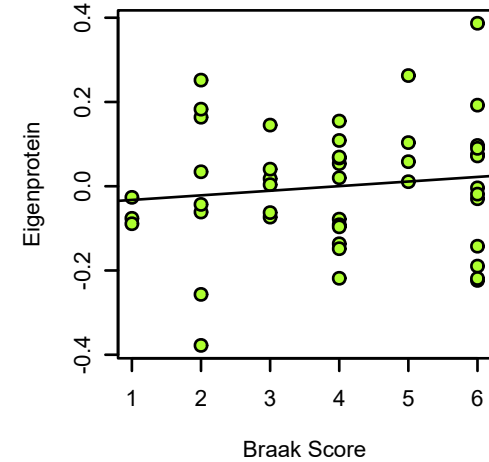**M13 salmon.Consensus**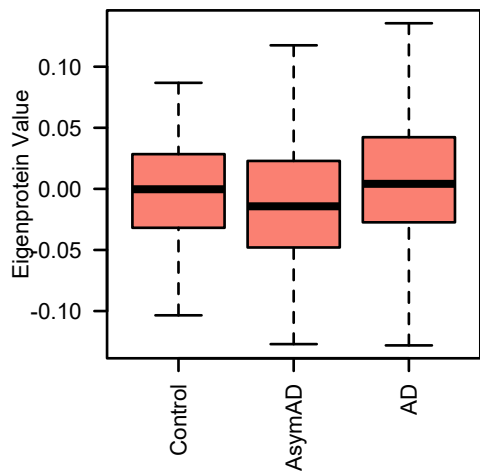**M13 salmon.BLSApc (Synthetic)**  
K-W ANOVA p: 6e-04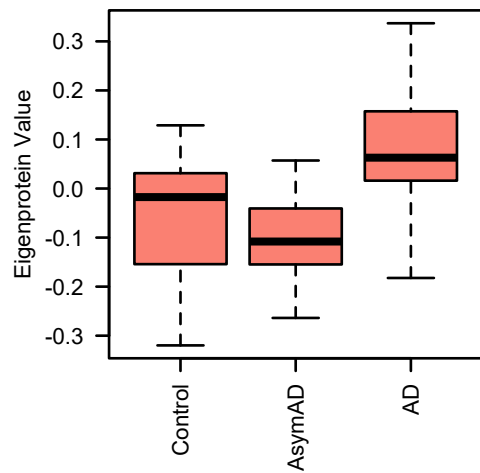**bicor=0.28, p=0.058**  
**cor=0.28, p=0.059**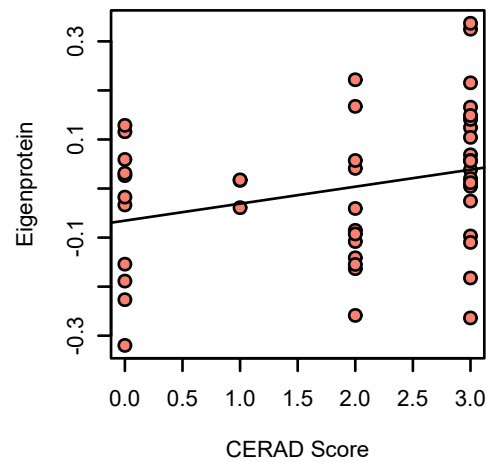**bicor=0.44, p=0.0024**  
**cor=0.44, p=0.0022**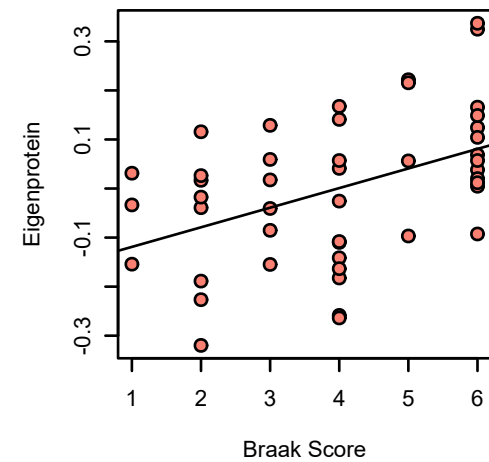**M3 brown.Consensus**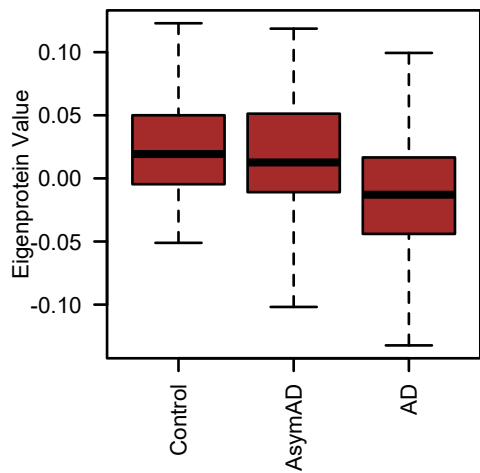**M3 brown.BLSApc (Synthetic)**  
K-W ANOVA p: 0.0078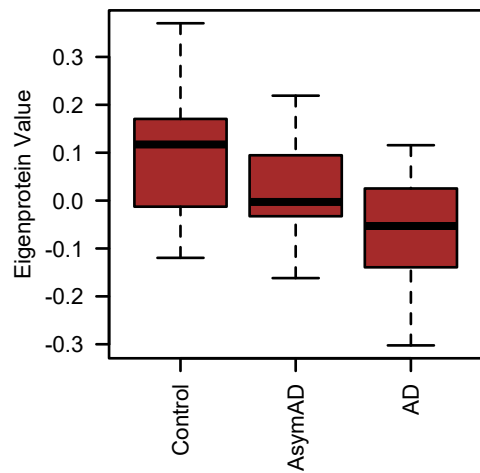**bicor=-0.34, p=0.019**  
**cor=-0.33, p=0.025**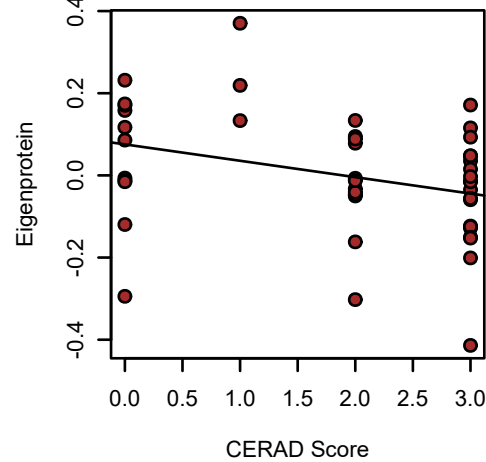**bicor=-0.39, p=0.0072**  
**cor=-0.39, p=0.0074**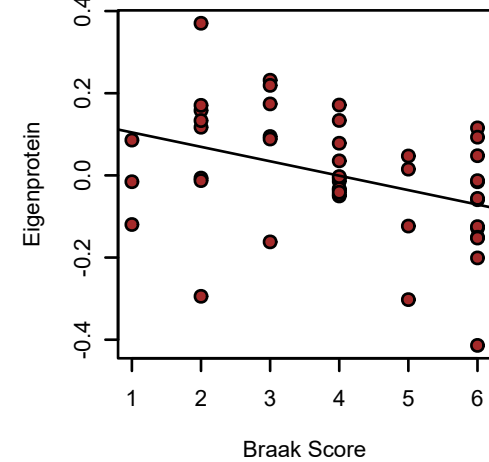

**M6 red.Consensus**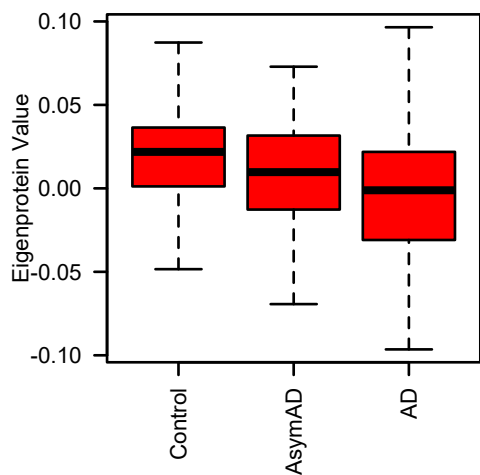**M6 red.BLSApc (Synthetic)  
K-W ANOVA p: 0.015**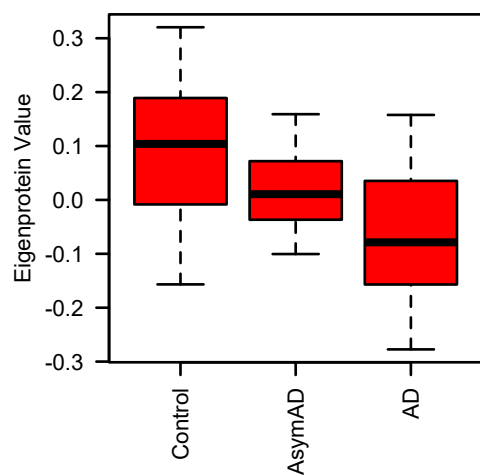**bicor=-0.36, p=0.013  
cor=-0.36, p=0.014**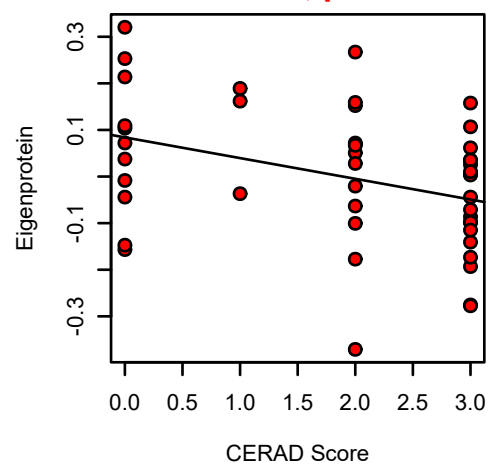**bicor=-0.42, p=0.0041  
cor=-0.4, p=0.0059**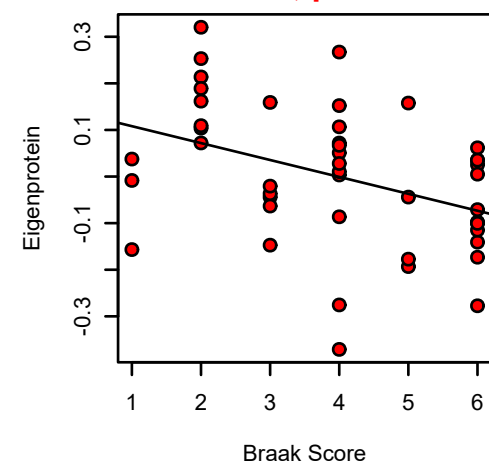**M1 turquoise.Consensus**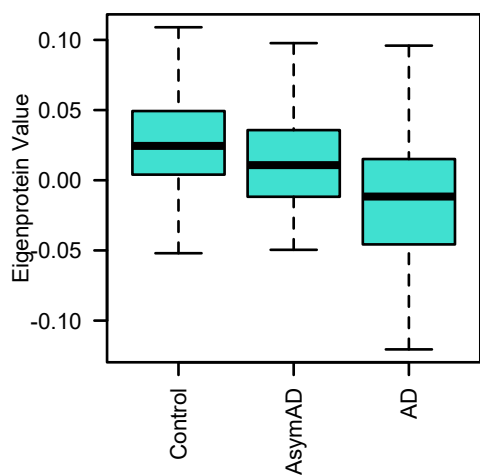**M1 turquoise.BLSApc (Synthetic)  
K-W ANOVA p: 0.00036**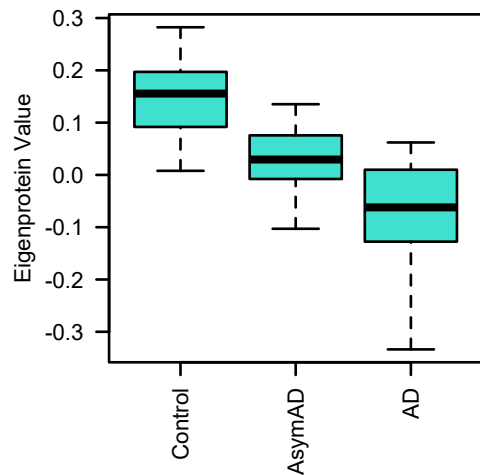**bicor=-0.49, p=0.00056  
cor=-0.48, p=0.00074**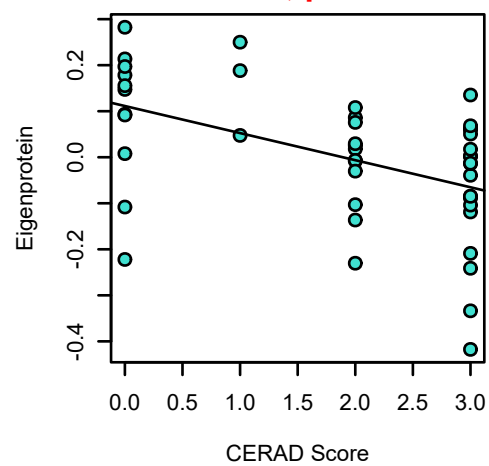**bicor=-0.55, p=6.4e-05  
cor=-0.52, p=0.00021**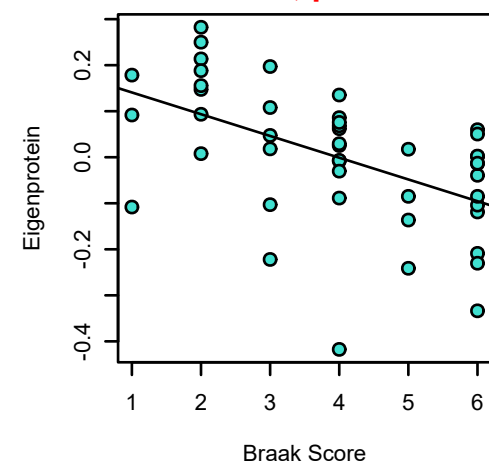**M12 tan.Consensus**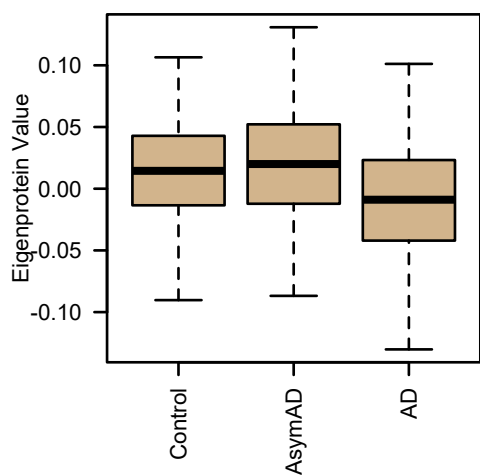**M12 tan.BLSApc (Synthetic)  
K-W ANOVA p: 0.77**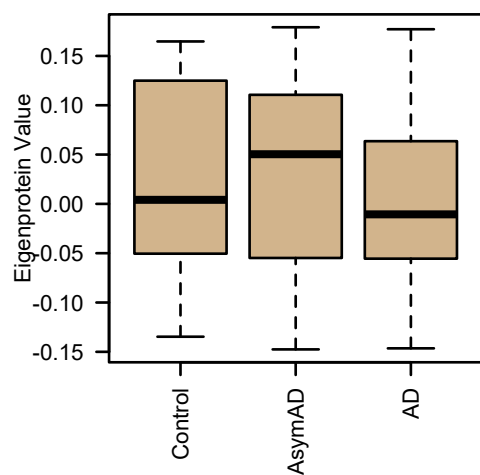**bicor=-0.073, p=0.63  
cor=0.0067, p=0.96**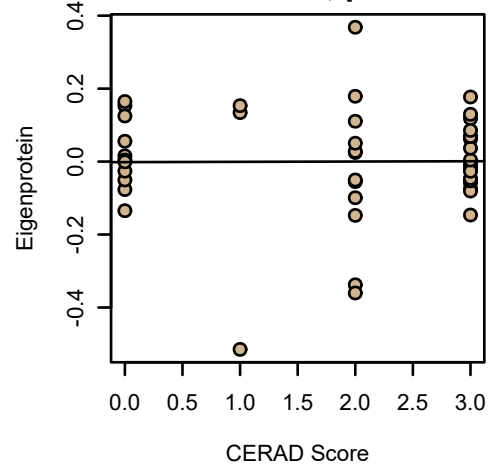**bicor=-0.14, p=0.34  
cor=-0.022, p=0.88**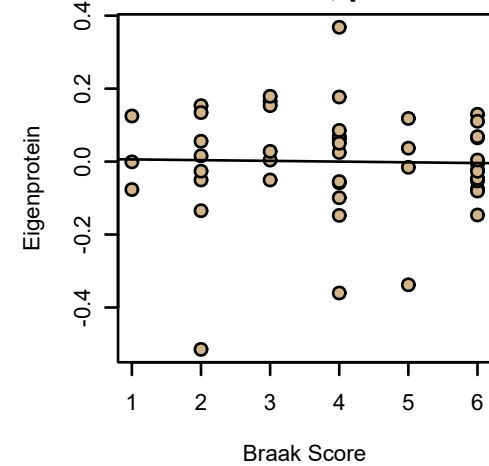**M7 black.Consensus**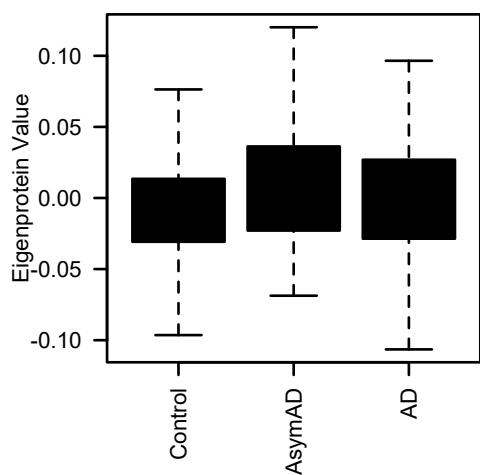**M7 black.BLSApc (Synthetic)  
K-W ANOVA p: 0.26**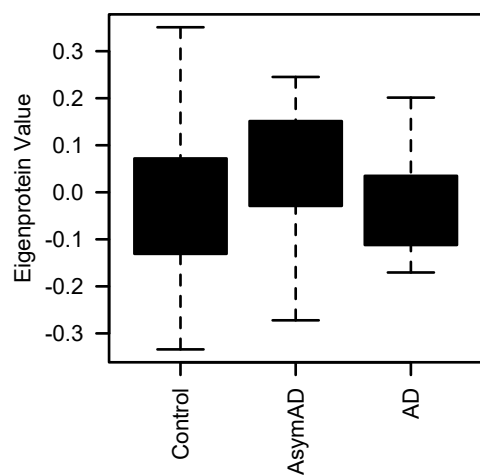**bicor=0.027, p=0.86  
cor=0.051, p=0.74**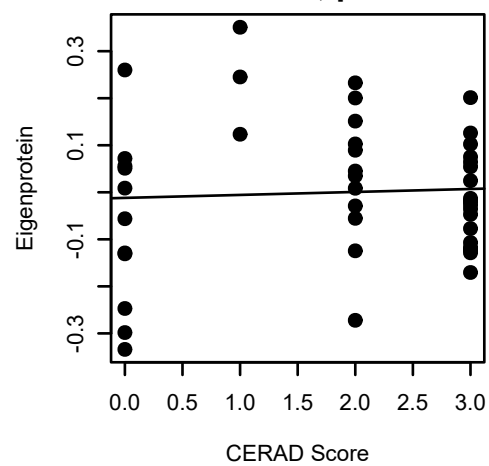**bicor=-0.025, p=0.87  
cor=-0.0056, p=0.97**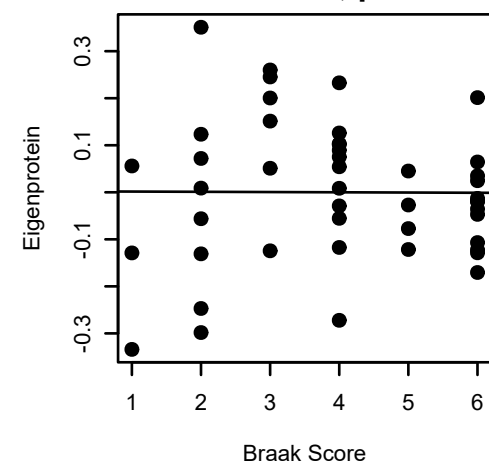

**M9 magenta.Consensus**

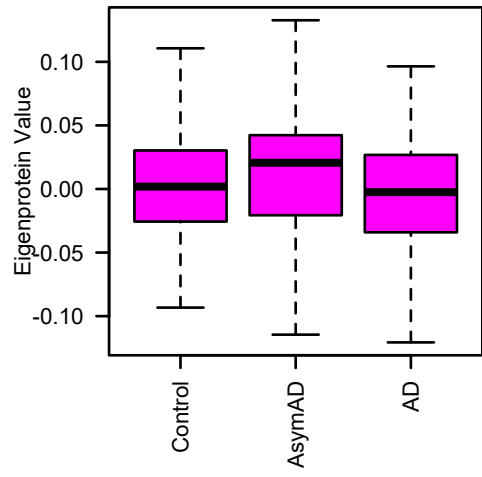

**M9 magenta.BLSApc (Synthetic)**  
K-W ANOVA p: 0.1

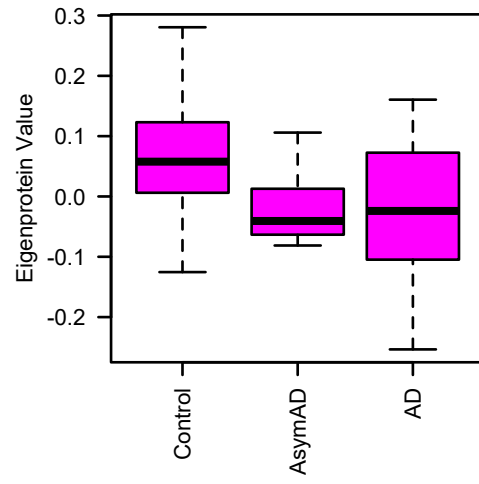

**bicor=-0.27, p=0.072**  
**cor=-0.28, p=0.059**

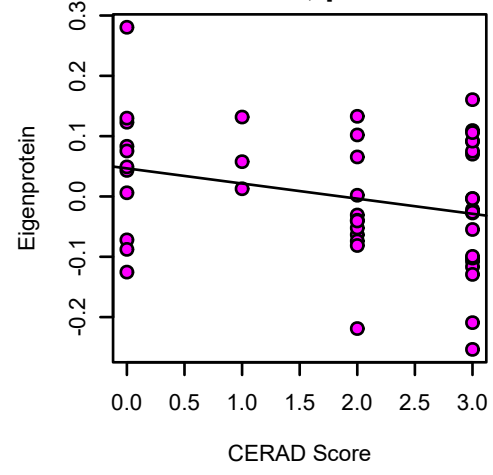

**bicor=-0.29, p=0.047**  
**cor=-0.3, p=0.043**

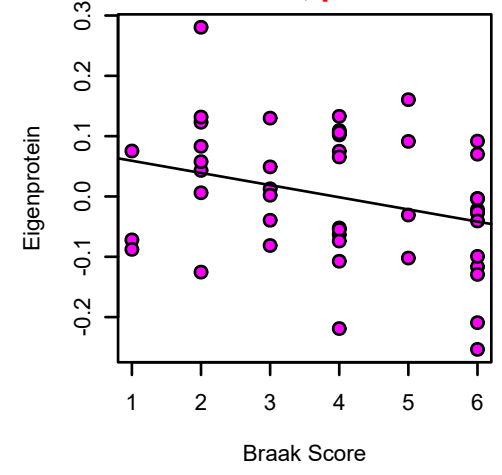



**M5 green.Consensus**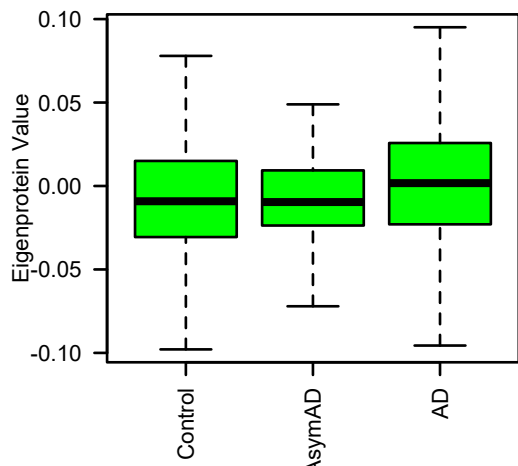**M5 green.Aging (Synthetic)  
K-W ANOVA p: 0.97**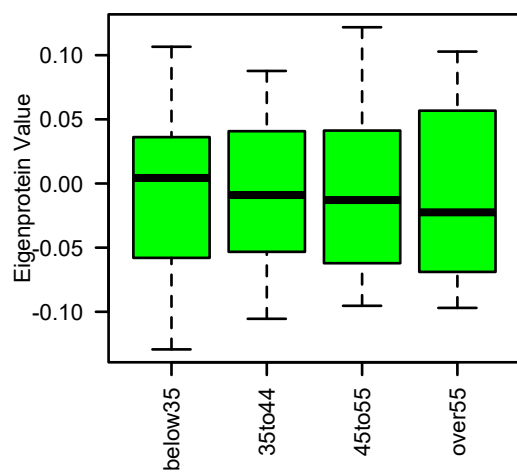**M5 green.Aging (Synthetic)  
K-W ANOVA p: 0.33**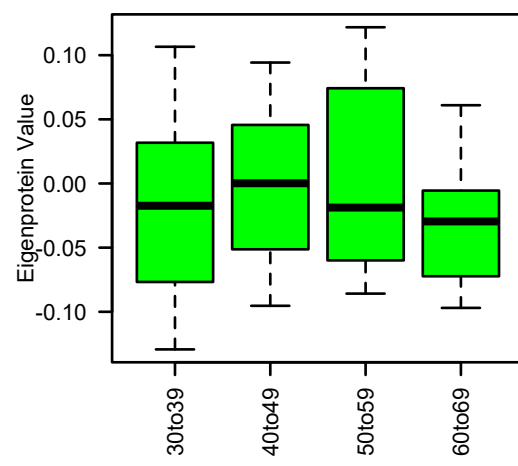**bicor=8e-04, p=0.99  
cor=-0.011, p=0.92**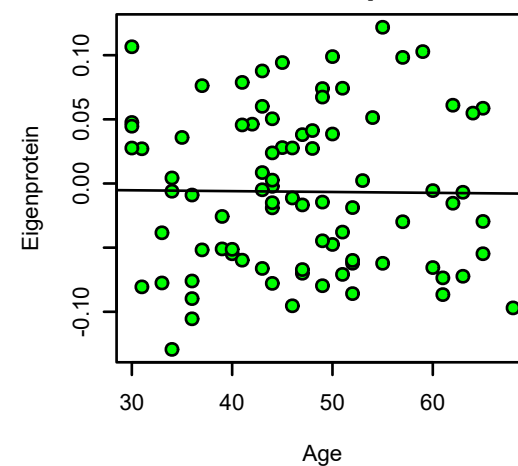**M8 pink.Consensus**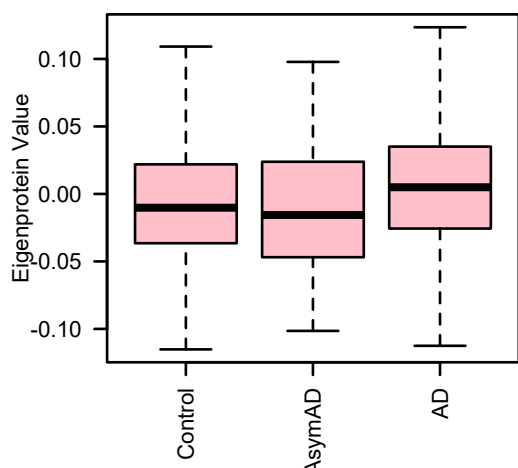**M8 pink.Aging (Synthetic)  
K-W ANOVA p: 0.65**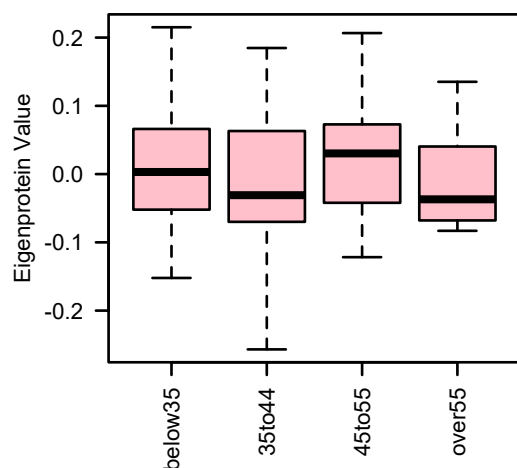**M8 pink.Aging (Synthetic)  
K-W ANOVA p: 0.51**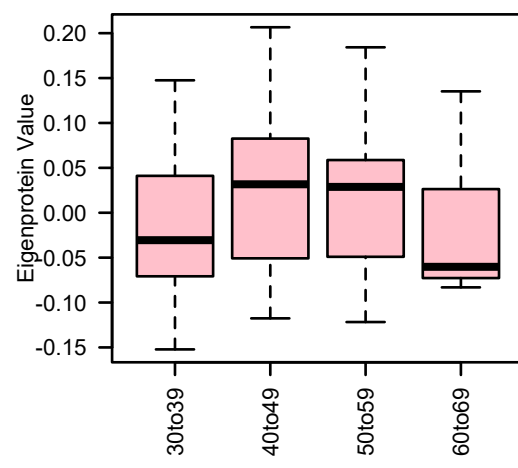**bicor=-0.047, p=0.67  
cor=-0.078, p=0.48**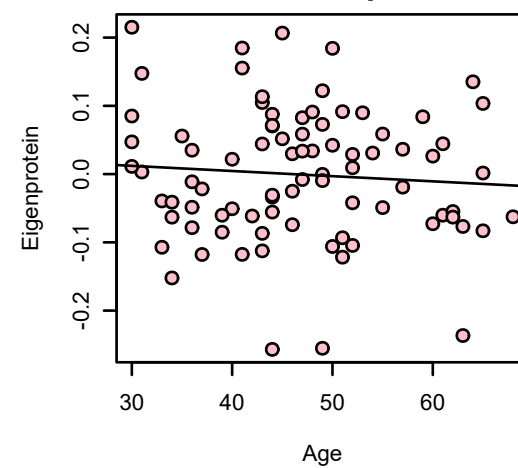**M10 purple.Consensus**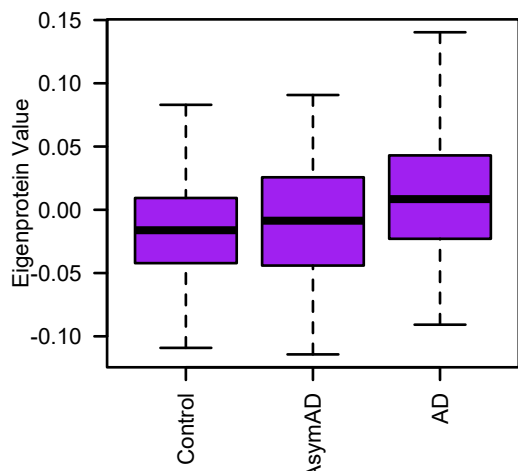**M10 purple.Aging (Synthetic)  
K-W ANOVA p: 0.49**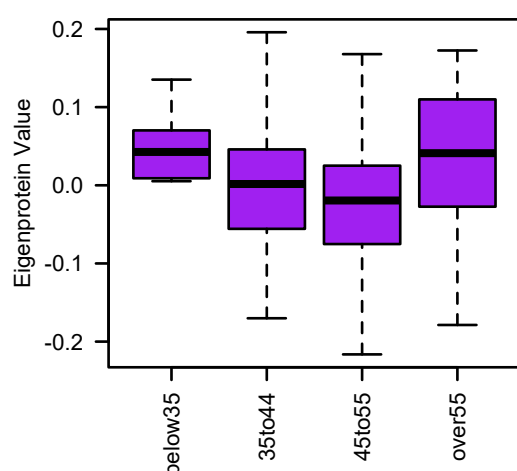**M10 purple.Aging (Synthetic)  
K-W ANOVA p: 0.091**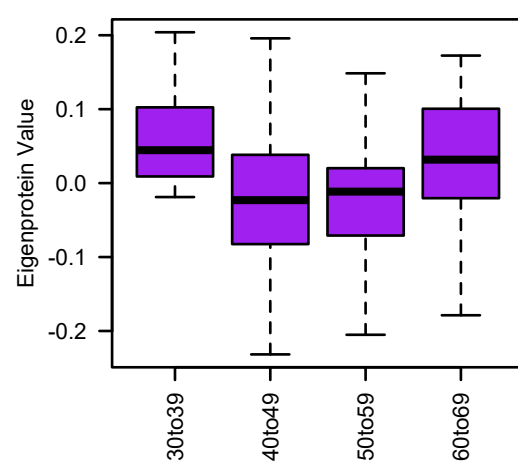**bicor=-0.049, p=0.66  
cor=-0.026, p=0.81**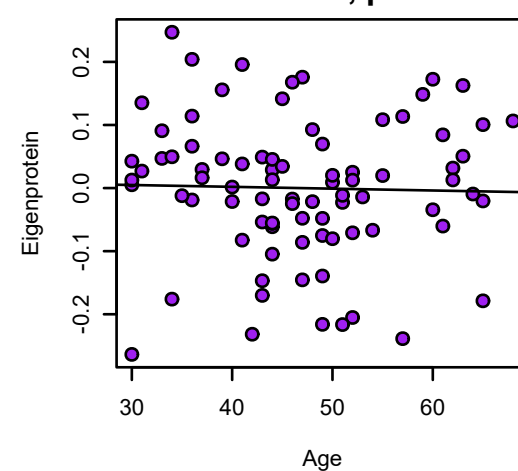**M2 blue.Consensus**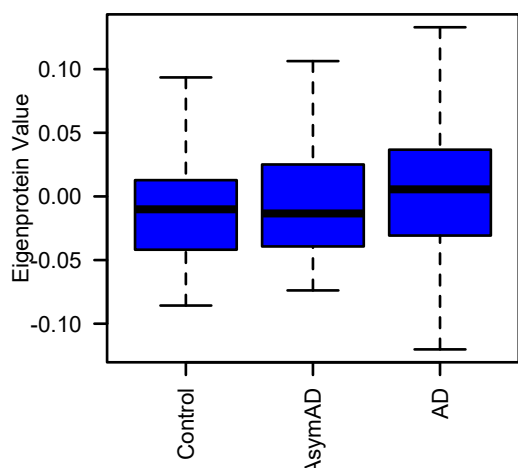**M2 blue.Aging (Synthetic)  
K-W ANOVA p: 0.37**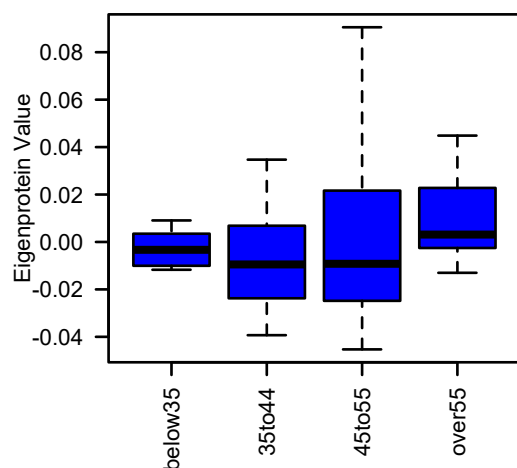**M2 blue.Aging (Synthetic)  
K-W ANOVA p: 0.24**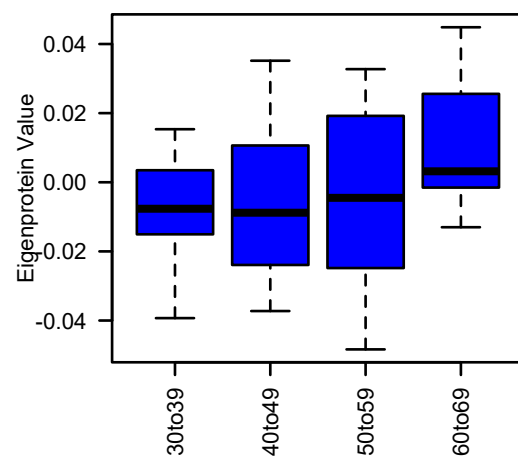**bicor=0.21, p=0.06  
cor=0.18, p=0.1**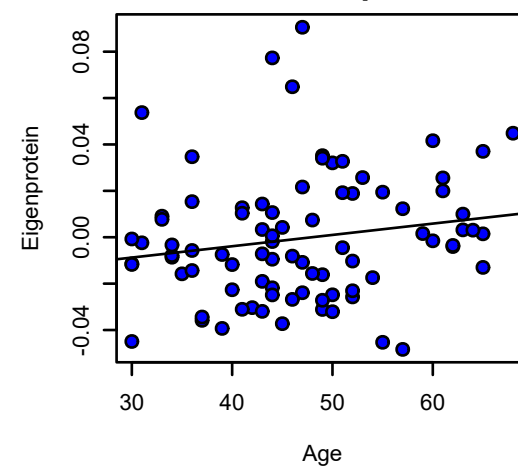

**M4 yellow.Consensus**

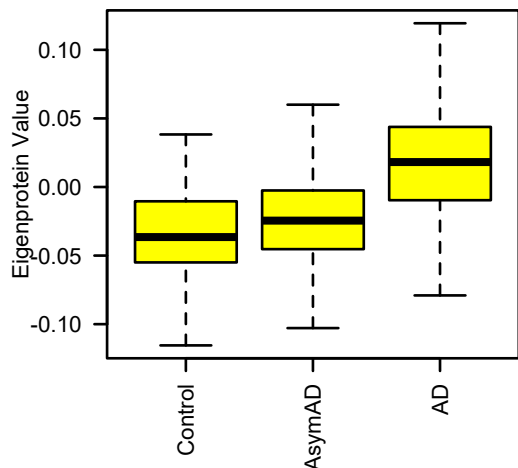

**M4 yellow.Aging (Synthetic)**  
K-W ANOVA p: 0.083

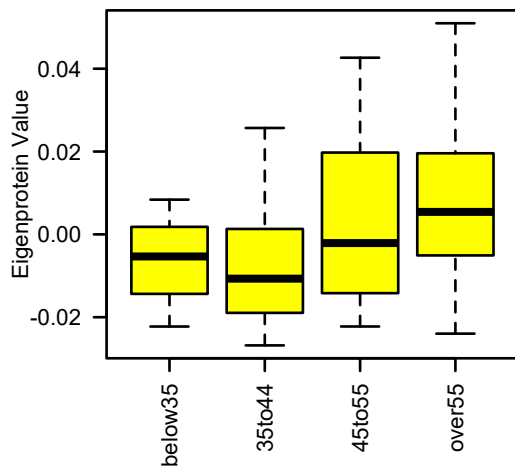

**M4 yellow.Aging (Synthetic)**  
K-W ANOVA p: 0.14

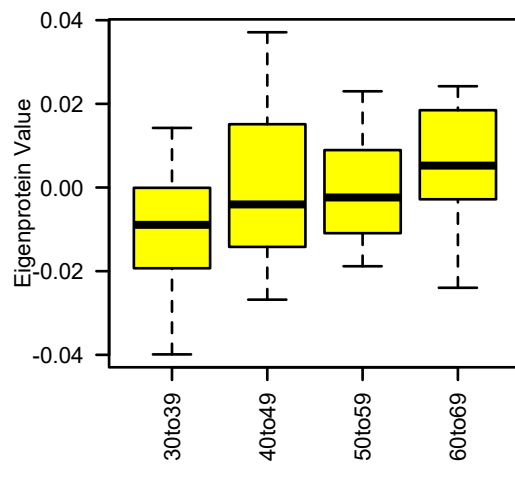

**bicor=0.28, p=0.01**  
**cor=0.25, p=0.022**

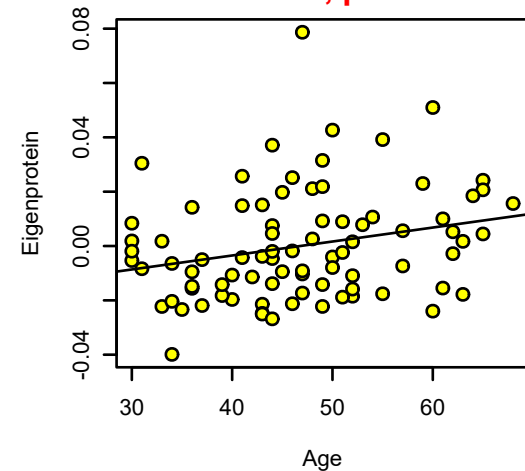

**M11 greenyellow.Consensus**

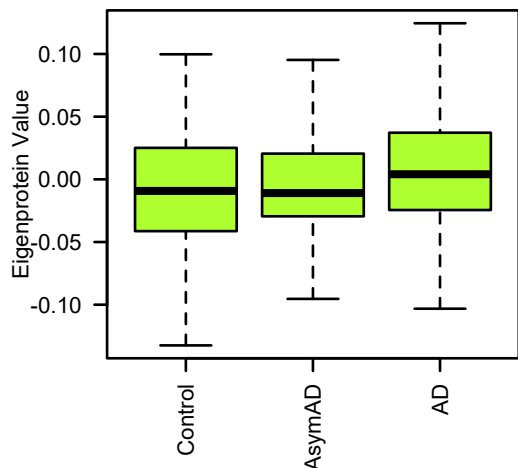

**M11 greenyellow.Aging (Synthetic)**  
K-W ANOVA p: 0.53

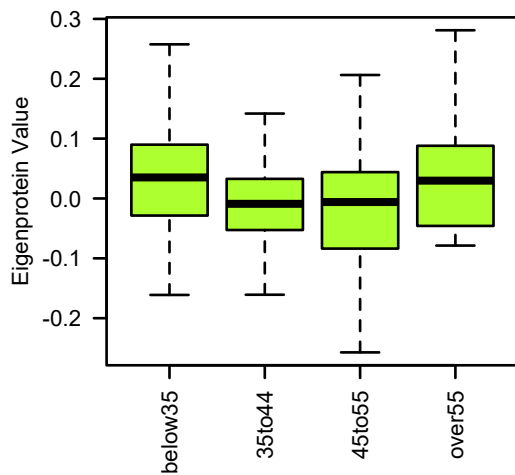

**M11 greenyellow.Aging (Synthetic)**  
K-W ANOVA p: 0.18

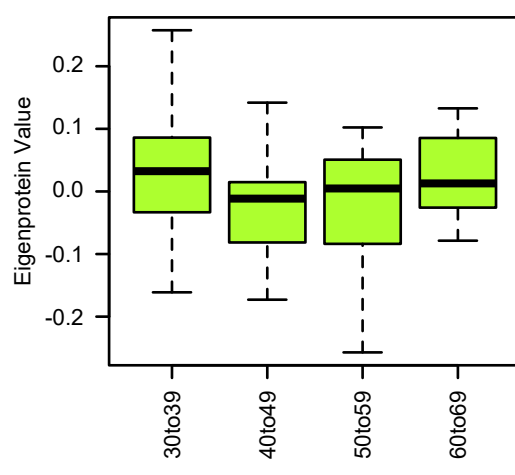

**bicor=0.0075, p=0.95**  
**cor=-0.057, p=0.61**

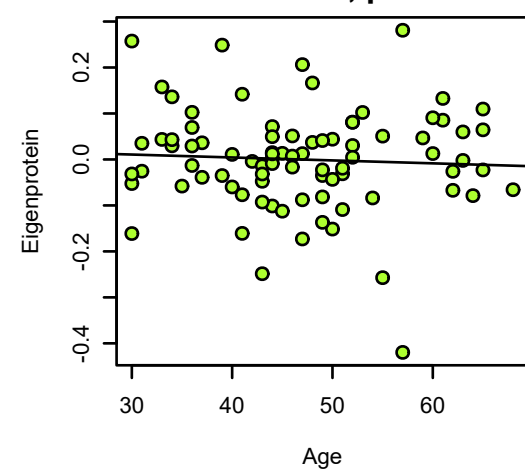

**M13 salmon.Consensus**

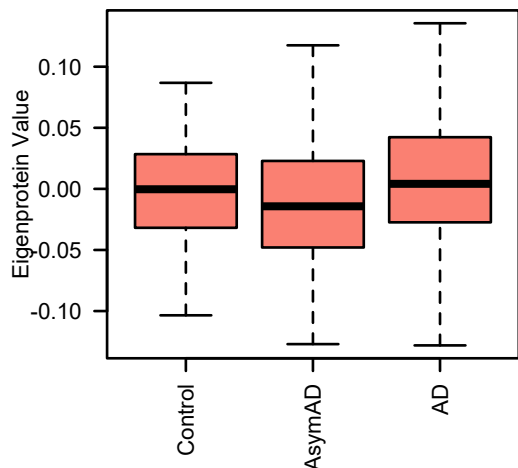

**M13 salmon.Aging (Synthetic)**  
K-W ANOVA p: 0.89

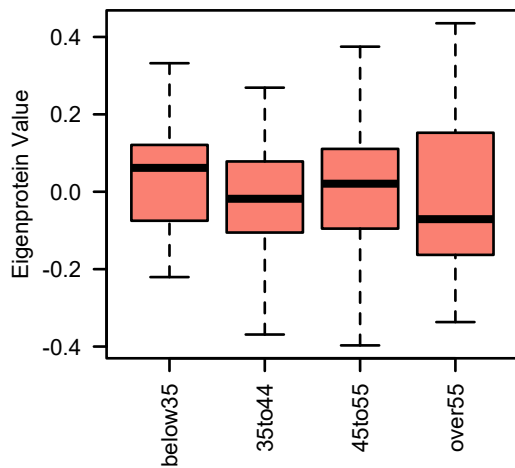

**M13 salmon.Aging (Synthetic)**  
K-W ANOVA p: 0.065

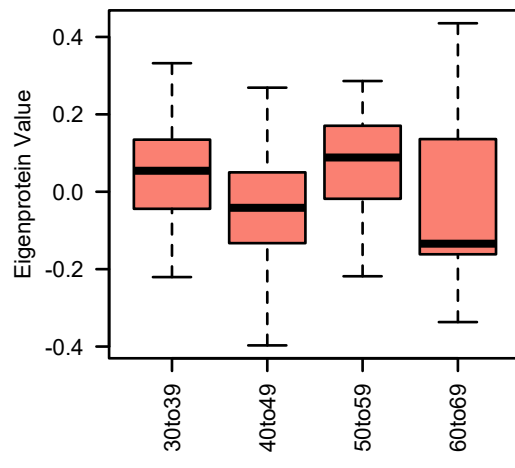

**bicor=-0.002, p=0.99**  
**cor=0.0057, p=0.96**

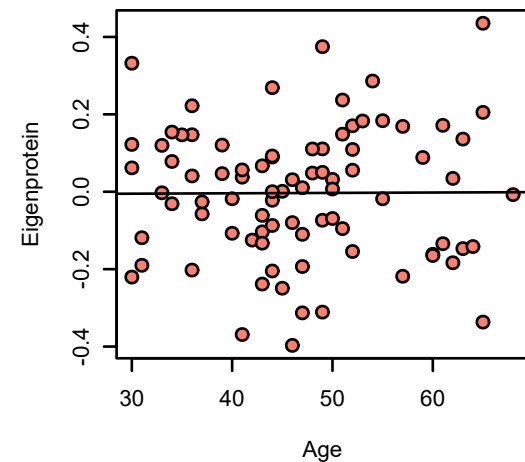

**M3 brown.Consensus**

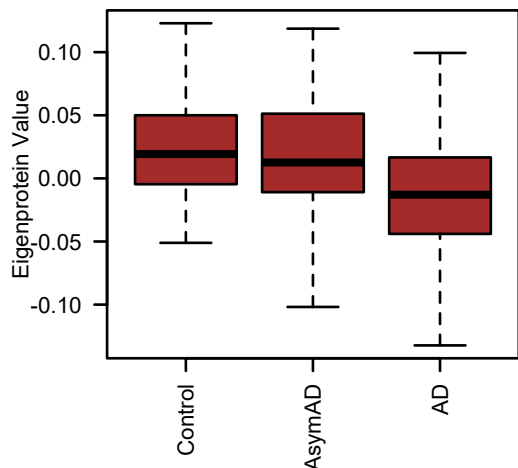

**M3 brown.Aging (Synthetic)**  
K-W ANOVA p: 0.68

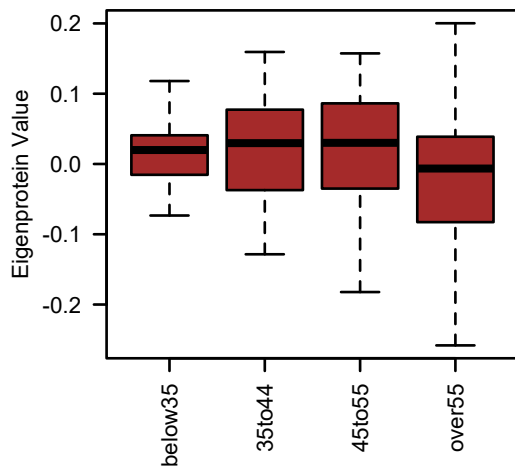

**M3 brown.Aging (Synthetic)**  
K-W ANOVA p: 0.91

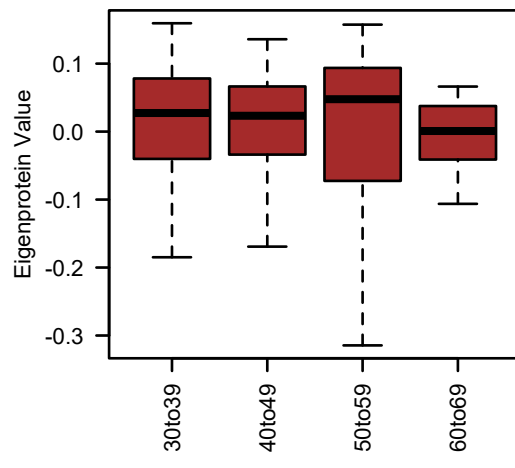

**bicor=-0.028, p=0.8**  
**cor=-0.04, p=0.72**

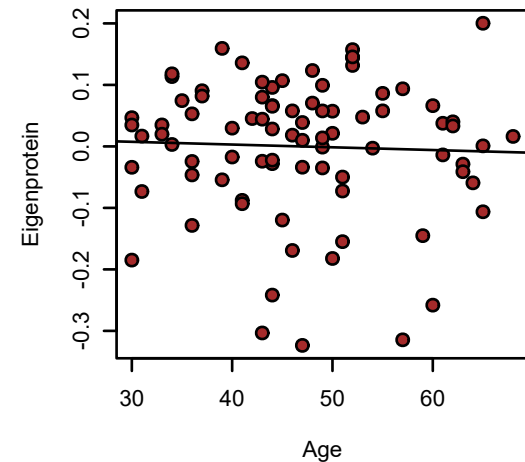

**M6 red.Consensus**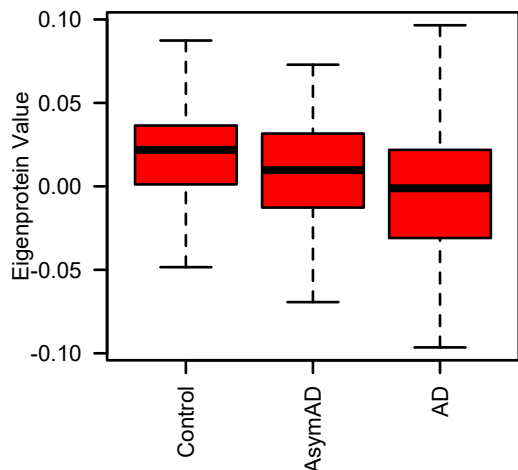**M6 red.Aging (Synthetic)**  
K-W ANOVA p: 0.24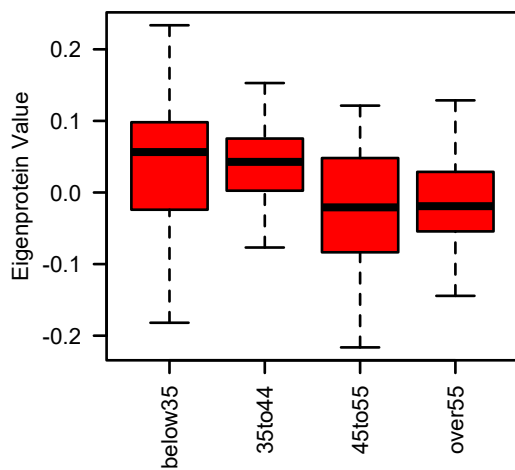**M6 red.Aging (Synthetic)**  
K-W ANOVA p: 0.17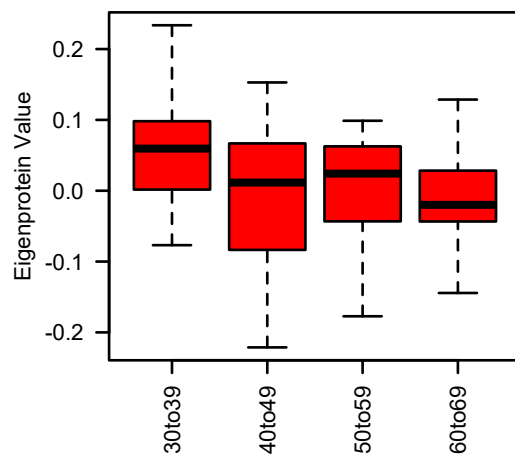**bicor=-0.21, p=0.055**  
**cor=-0.18, p=0.1**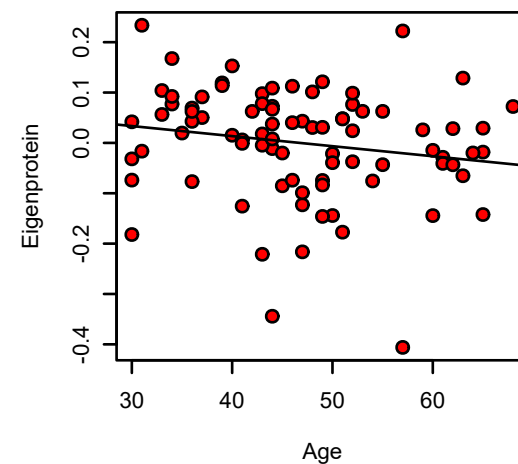**M1 turquoise.Consensus**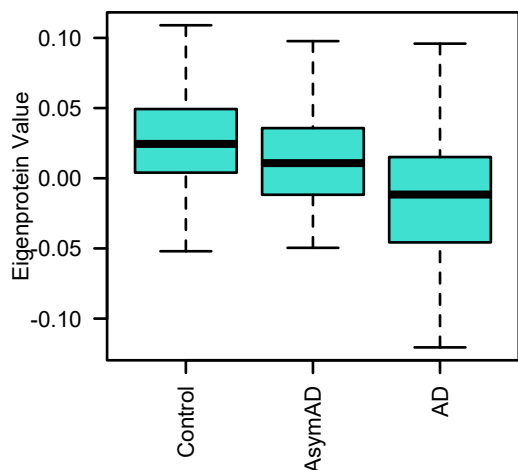**M1 turquoise.Aging (Synthetic)**  
K-W ANOVA p: 0.074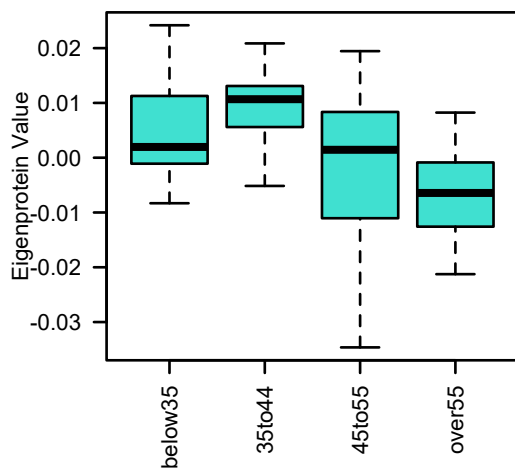**M1 turquoise.Aging (Synthetic)**  
K-W ANOVA p: 0.15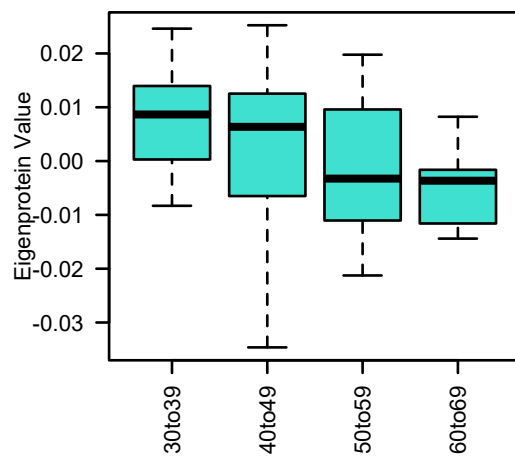**bicor=-0.35, p=0.001**  
**cor=-0.23, p=0.035**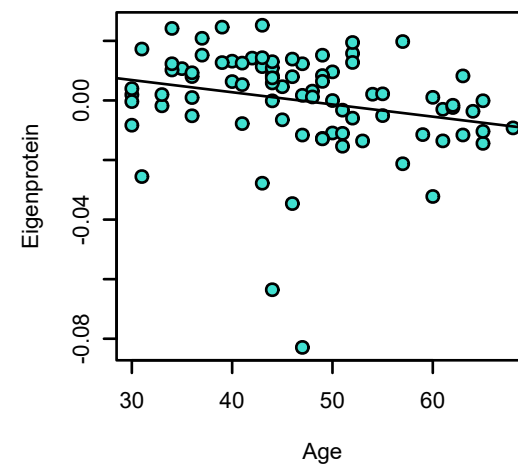**M12 tan.Consensus**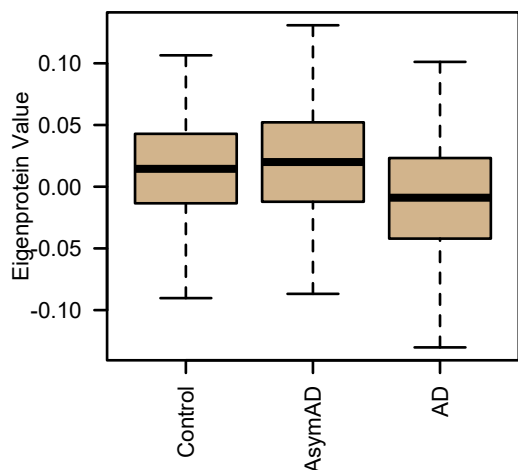**M12 tan.Aging (Synthetic)**  
K-W ANOVA p: 0.5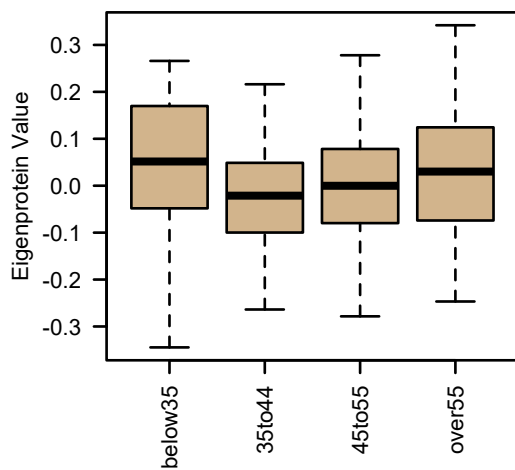**M12 tan.Aging (Synthetic)**  
K-W ANOVA p: 0.66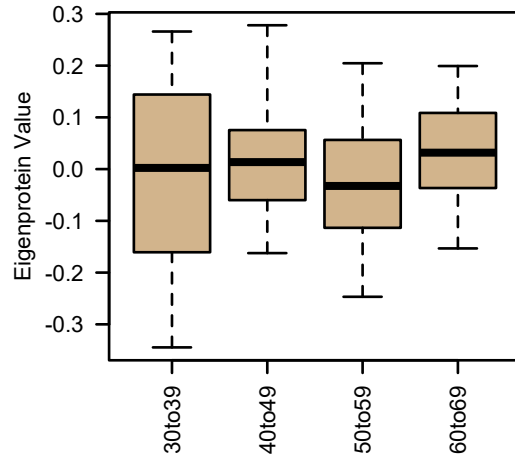**bicor=0.025, p=0.82**  
**cor=0.059, p=0.59**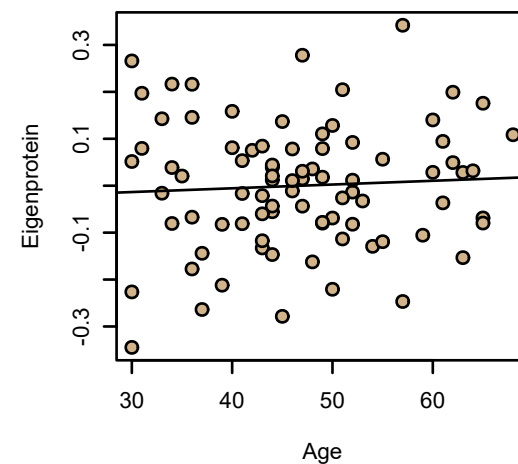**M7 black.Consensus**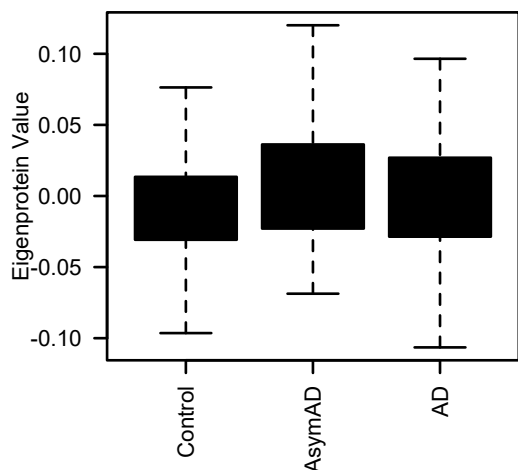**M7 black.Aging (Synthetic)**  
K-W ANOVA p: 0.3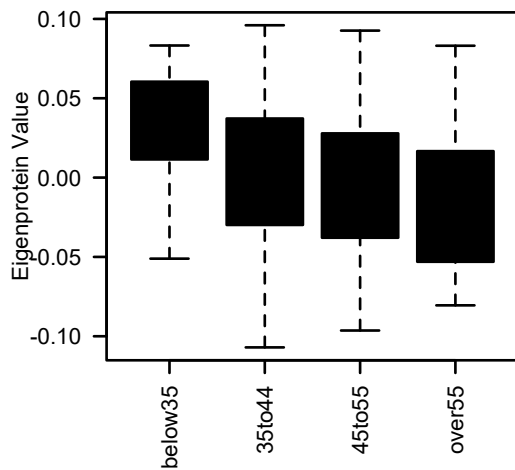**M7 black.Aging (Synthetic)**  
K-W ANOVA p: 0.33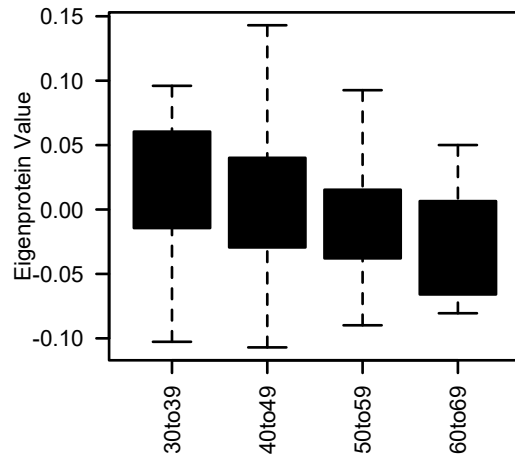**bicor=-0.2, p=0.071**  
**cor=-0.19, p=0.083**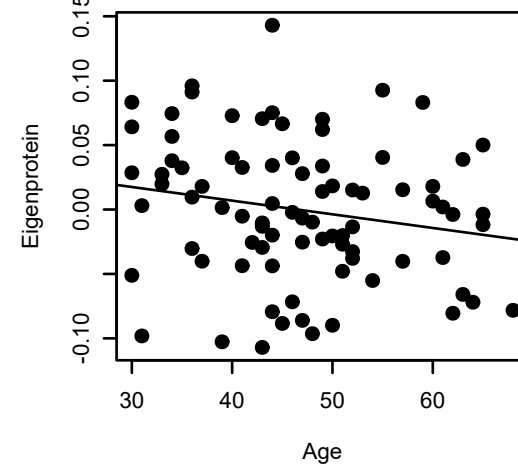

**M9 magenta.Consensus**

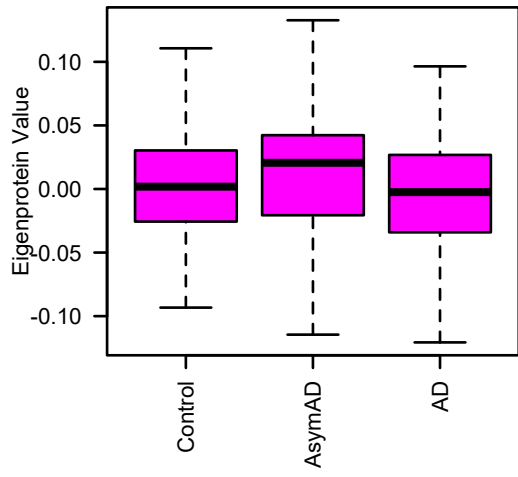

**M9 magenta.Aging (Synthetic)**  
**K-W ANOVA p: 0.045**

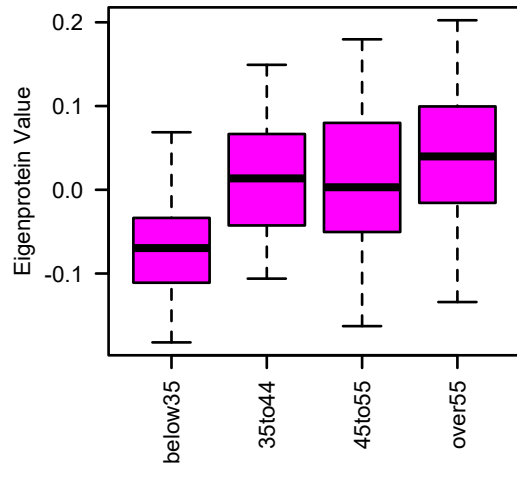

**M9 magenta.Aging (Synthetic)**  
**K-W ANOVA p: 0.0055**

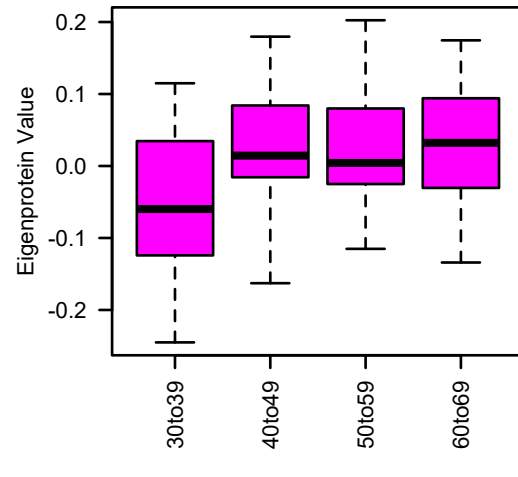

**bicor=0.29, p=0.008**  
**cor=0.3, p=0.0056**

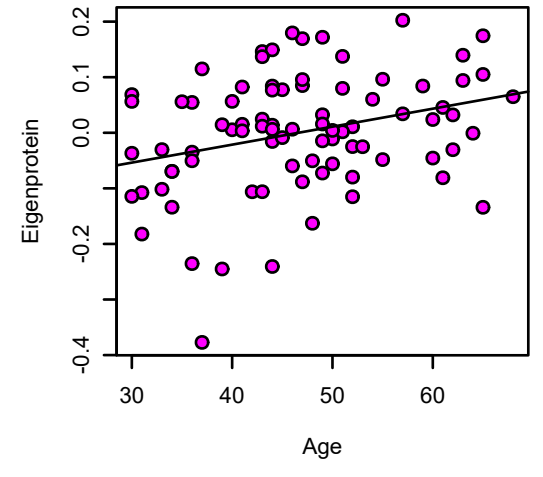



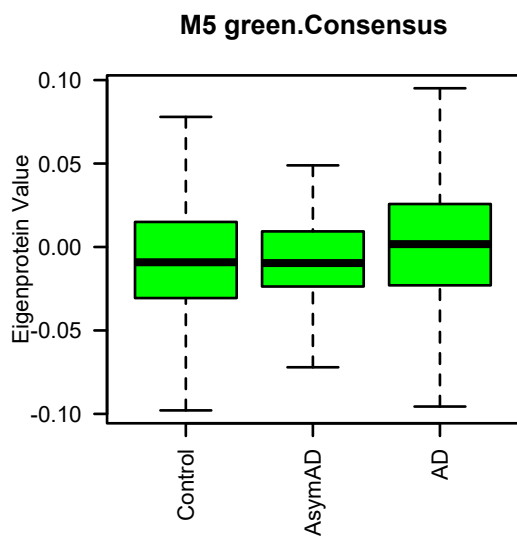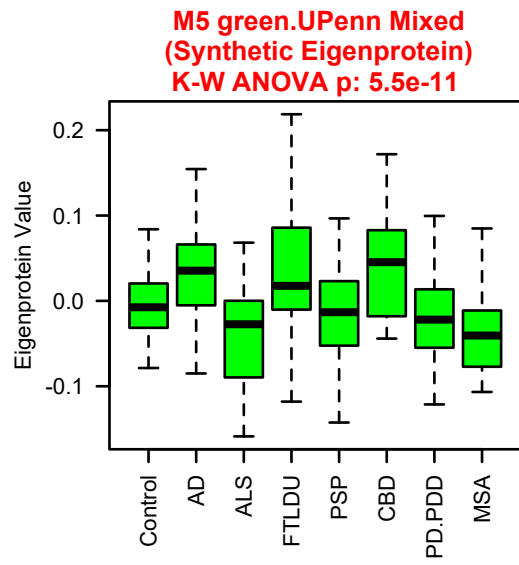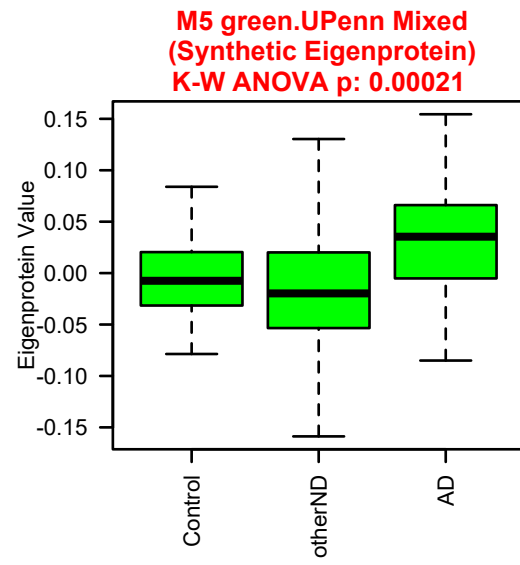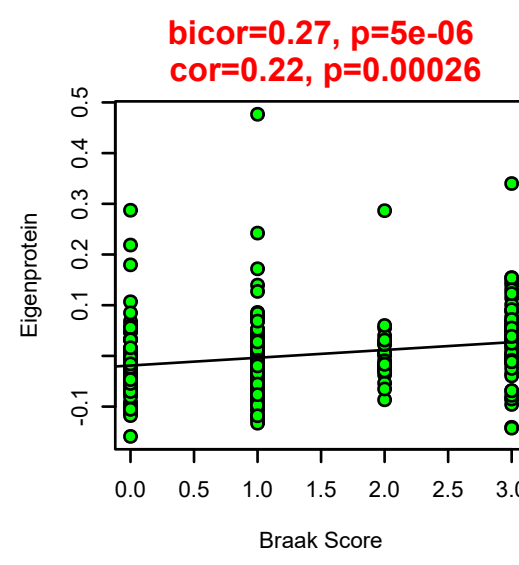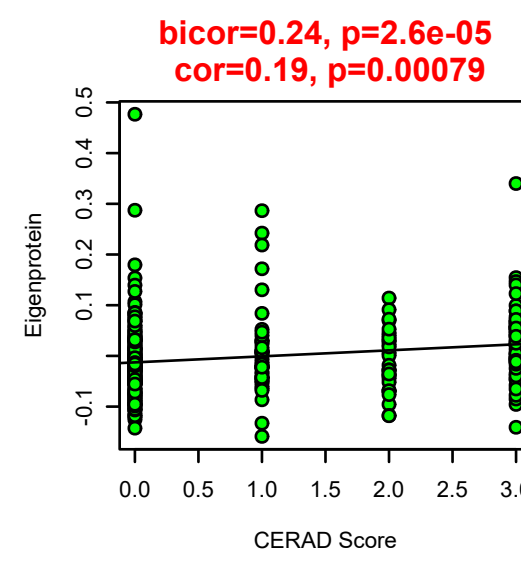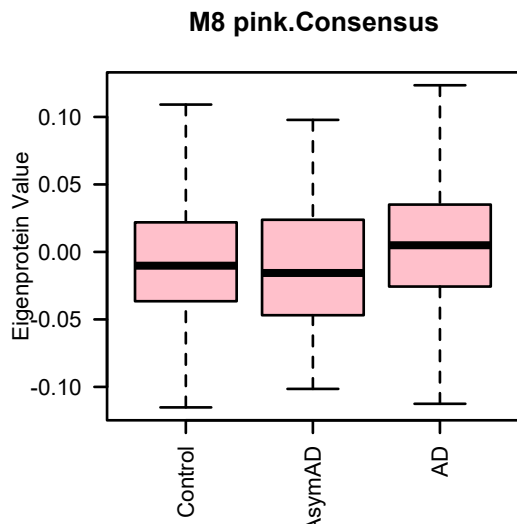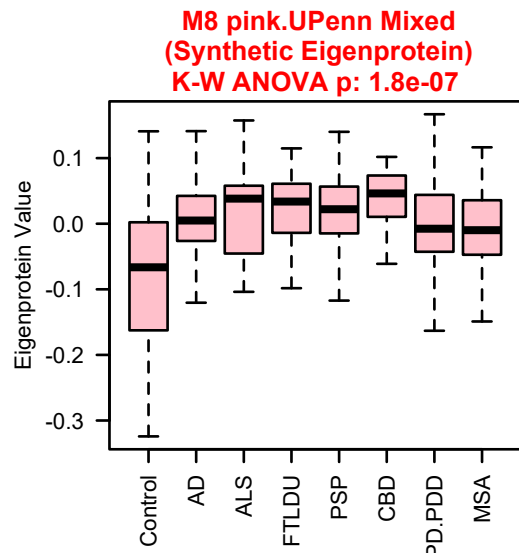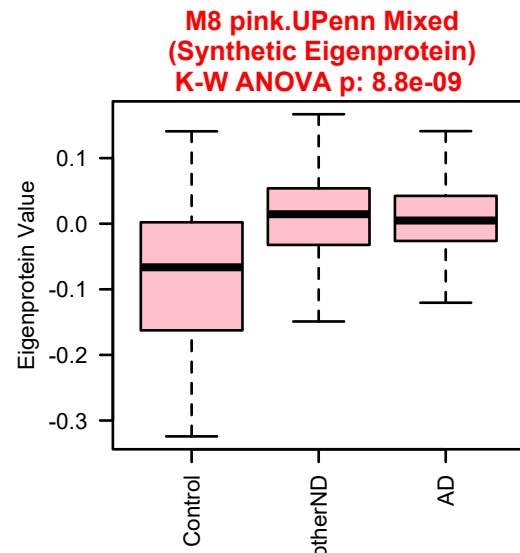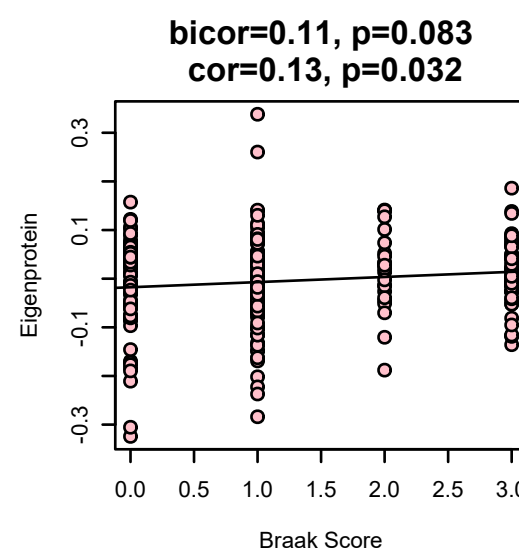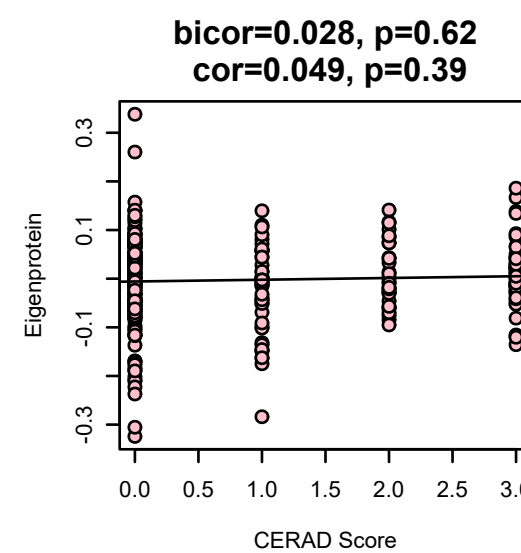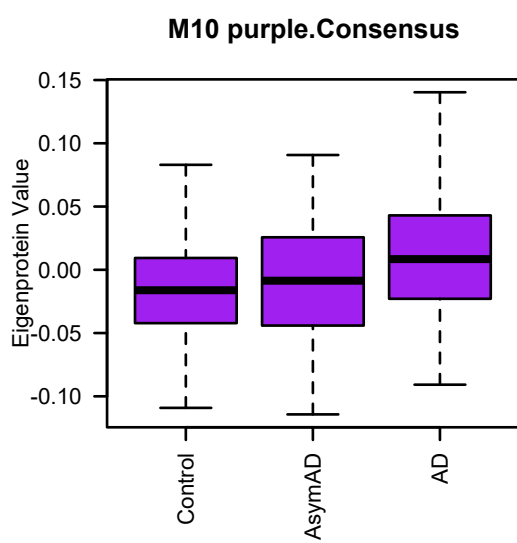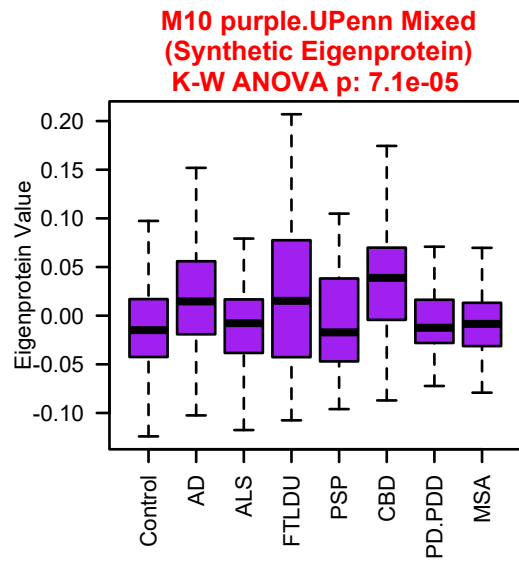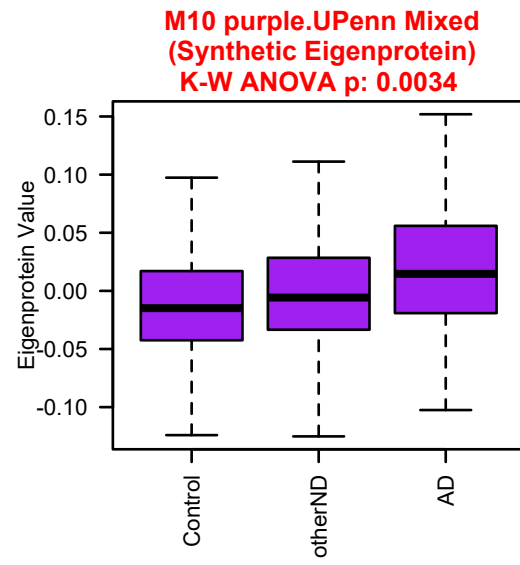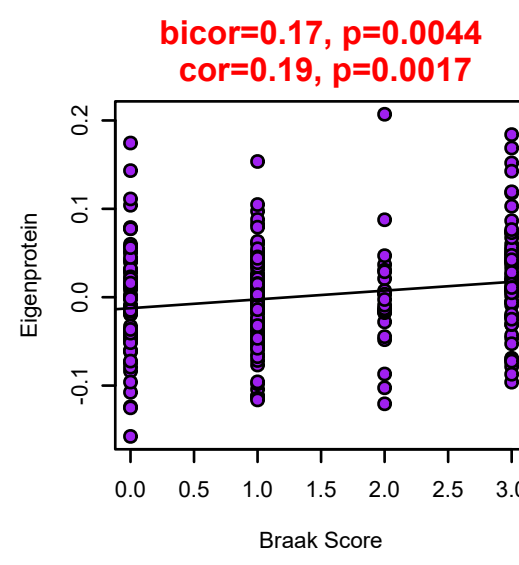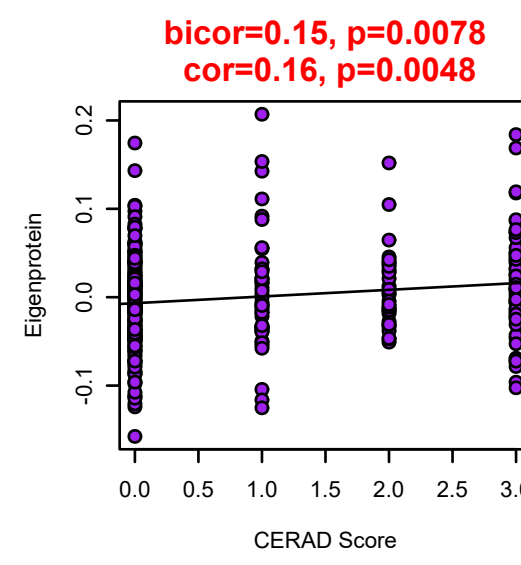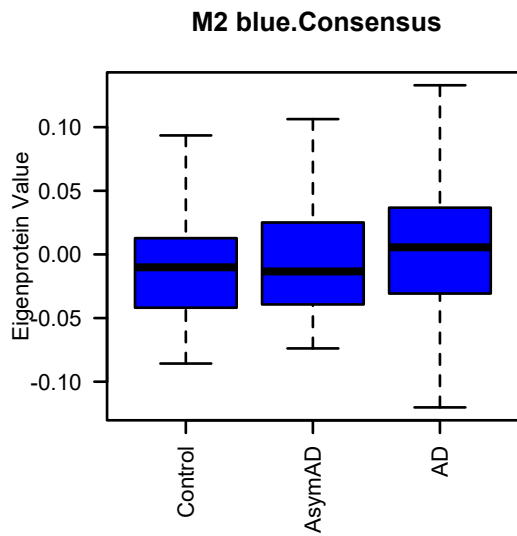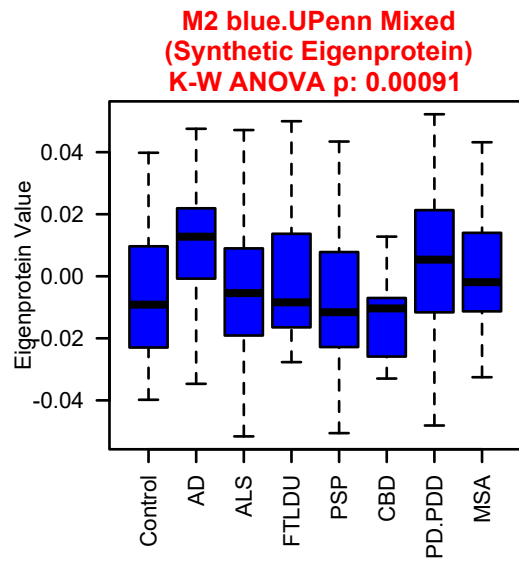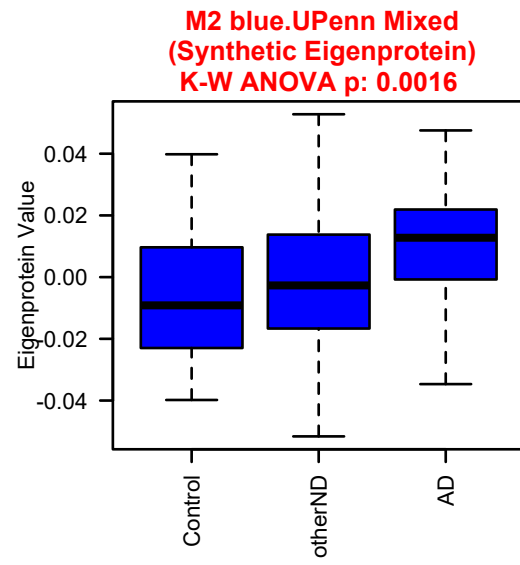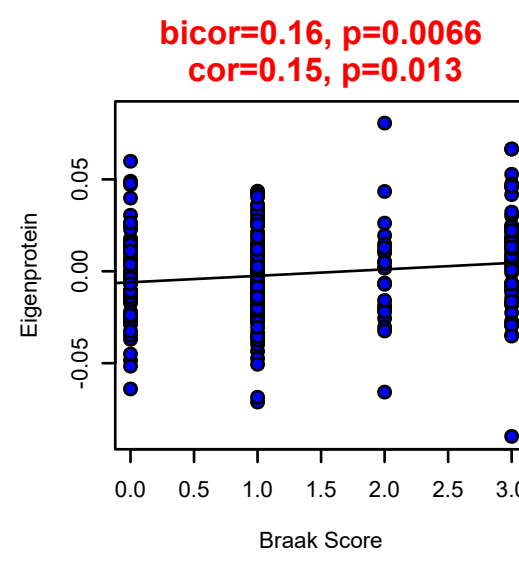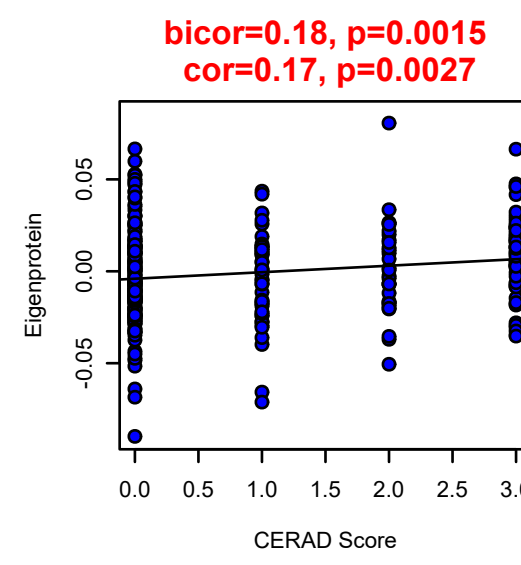

**M4 yellow.Consensus**



**M4 yellow.UPenn Mixed (Synthetic Eigenprotein)**  
K-W ANOVA p: 4.3e-29

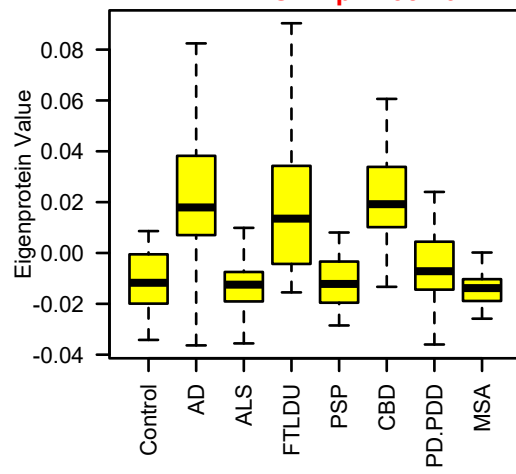

**M4 yellow.UPenn Mixed (Synthetic Eigenprotein)**  
K-W ANOVA p: 6.6e-12

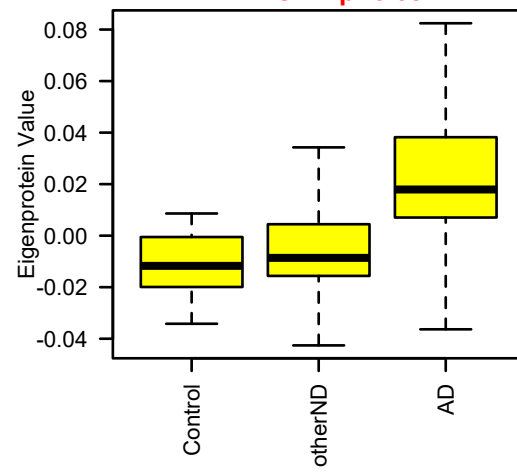

**bicor=0.42, p=5.4e-13**  
**cor=0.36, p=1e-09**

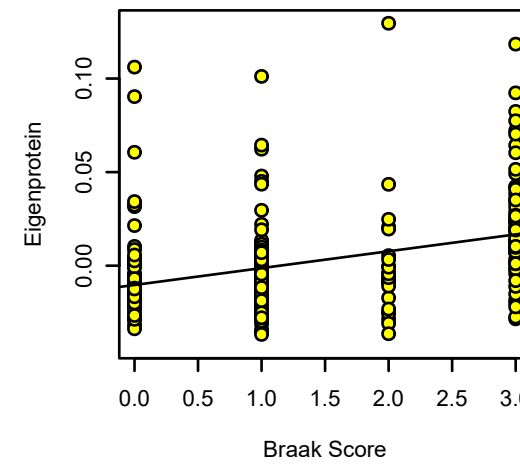

**bicor=0.36, p=4.9e-11**  
**cor=0.31, p=2.6e-08**

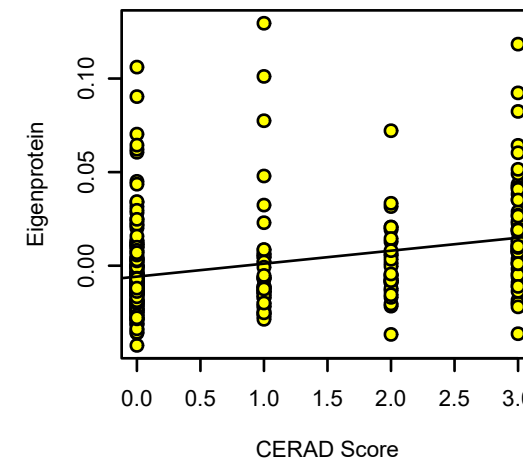

**M11 greenyellow.Consensus**



**M11 greenyellow.UPenn Mixed (Synthetic Eigenprotein)**  
K-W ANOVA p: 0.42

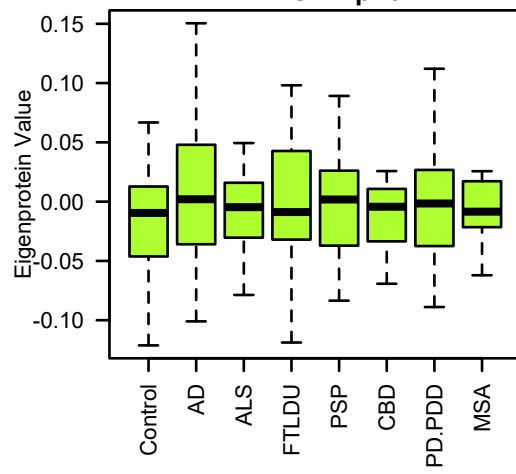

**M11 greenyellow.UPenn Mixed (Synthetic Eigenprotein)**  
K-W ANOVA p: 0.24

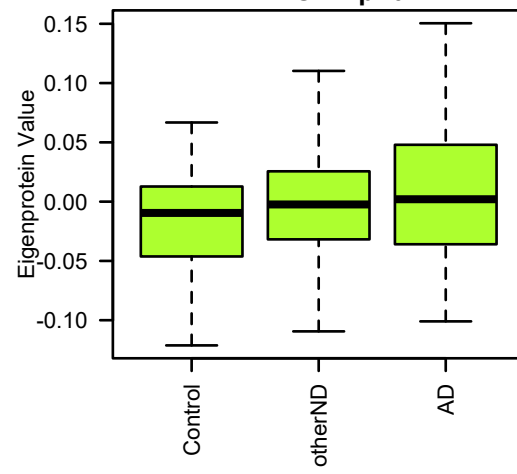

**bicor=0.025, p=0.68**  
**cor=0.0026, p=0.97**

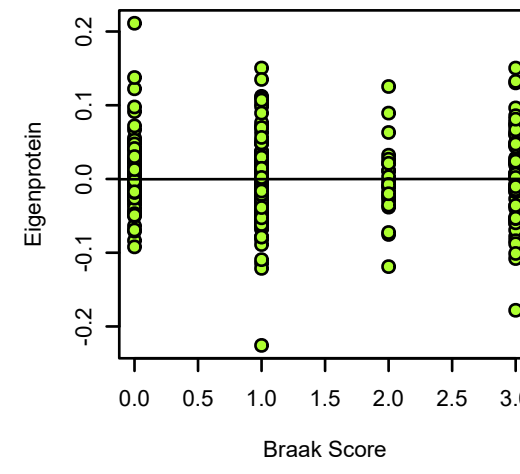

**bicor=0.059, p=0.3**  
**cor=0.03, p=0.6**

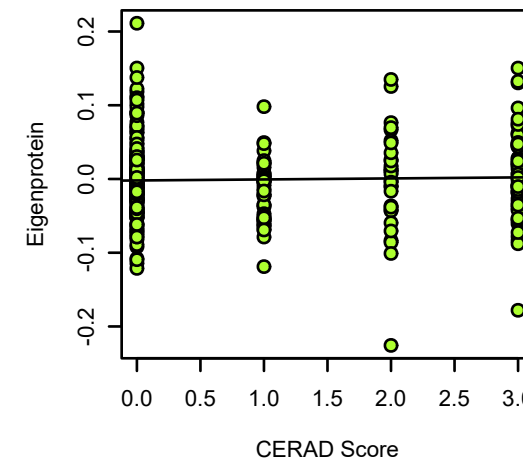

**M13 salmon.Consensus**

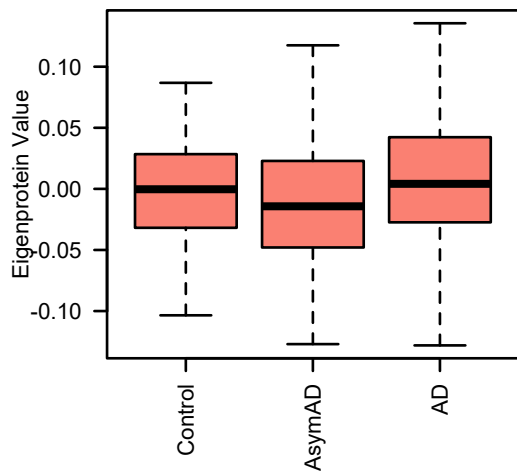

**M13 salmon.UPenn Mixed (Synthetic Eigenprotein)**  
K-W ANOVA p: 0.021

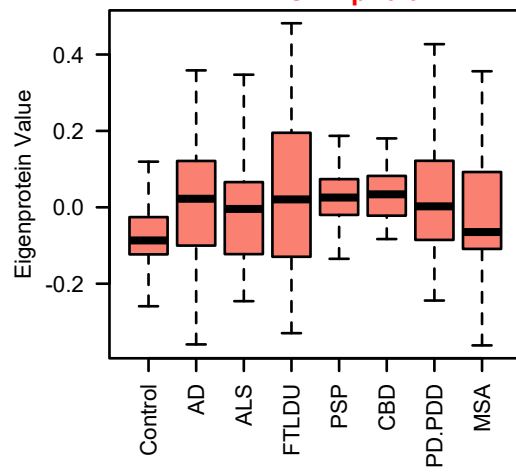

**M13 salmon.UPenn Mixed (Synthetic Eigenprotein)**  
K-W ANOVA p: 0.0028

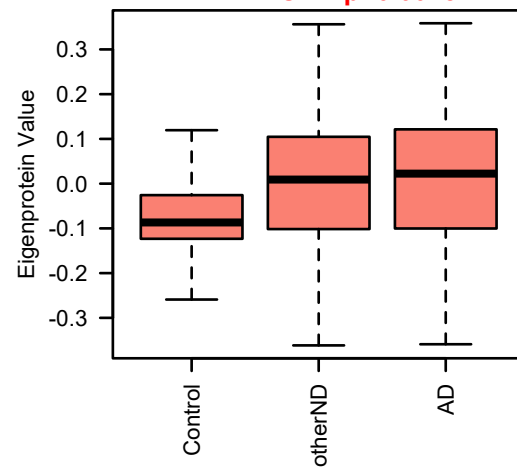

**bicor=0.091, p=0.14**  
**cor=0.058, p=0.34**

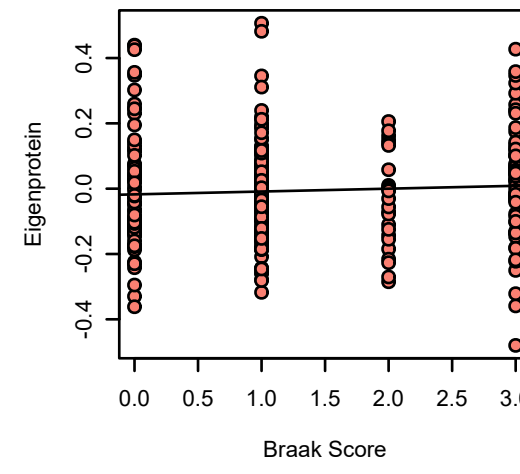

**bicor=-0.001, p=0.99**  
**cor=-0.013, p=0.82**

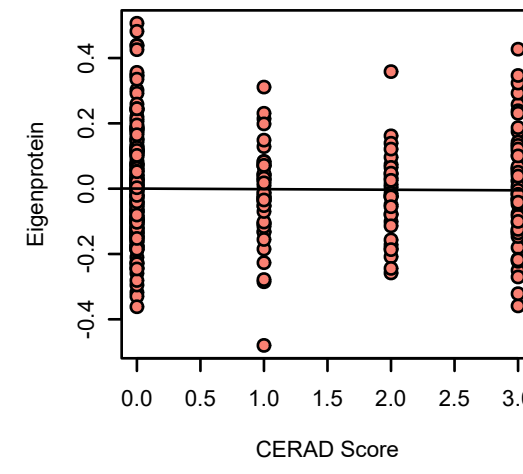

**M3 brown.Consensus**

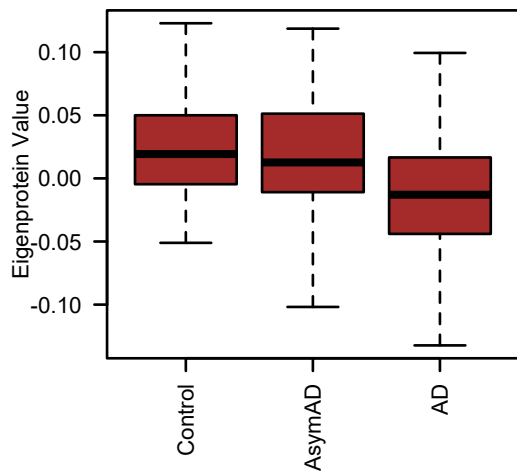

**M3 brown.UPenn Mixed (Synthetic Eigenprotein)**  
K-W ANOVA p: 3e-15

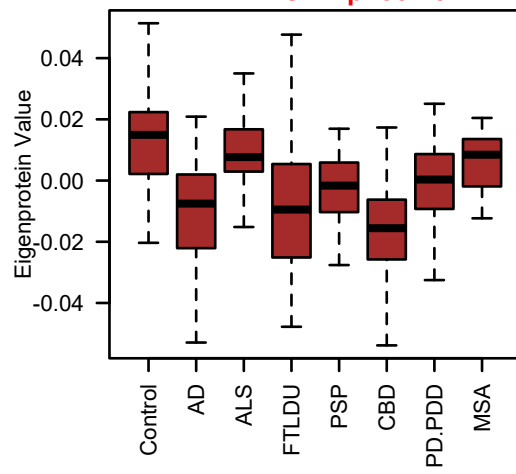

**M3 brown.UPenn Mixed (Synthetic Eigenprotein)**  
K-W ANOVA p: 1.9e-08

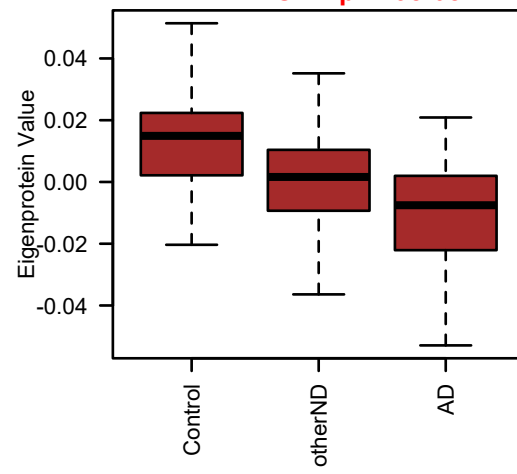

**bicor=-0.33, p=1.8e-08**  
**cor=-0.3, p=4.8e-07**

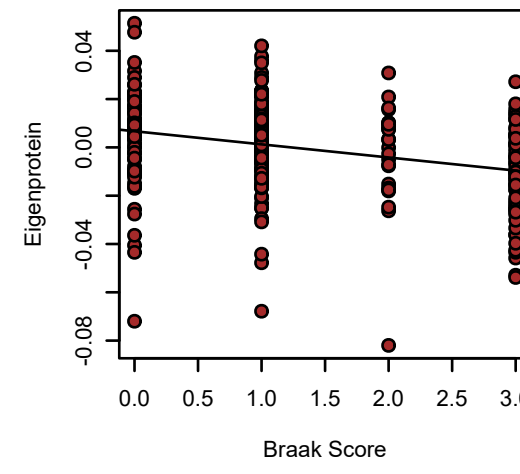

**bicor=-0.29, p=3.2e-07**  
**cor=-0.25, p=8.7e-06**

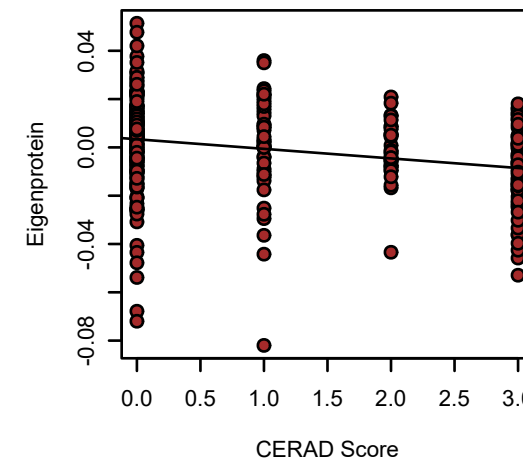

**M6 red.Consensus**

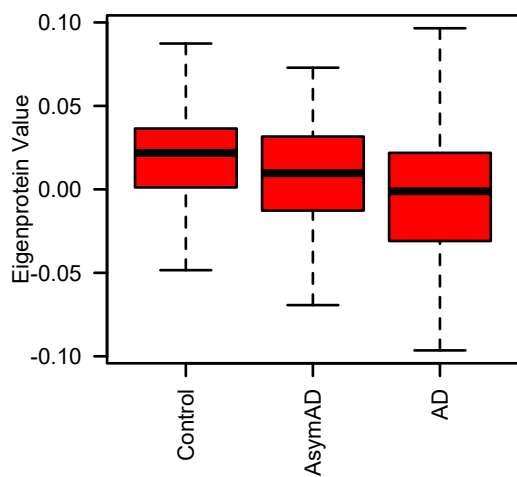

**M6 red.UPenn Mixed (Synthetic Eigenprotein)**  
K-W ANOVA p: 8.6e-07

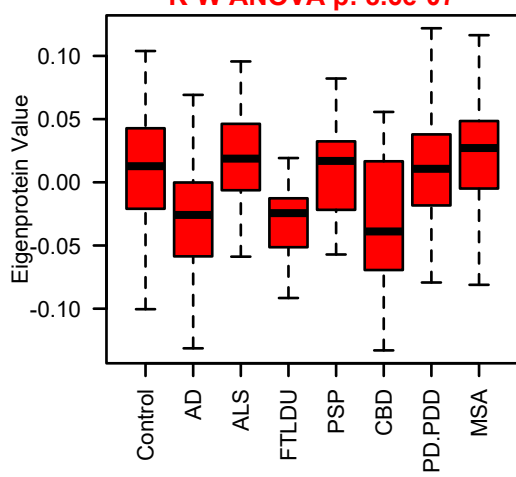

**M6 red.UPenn Mixed (Synthetic Eigenprotein)**  
K-W ANOVA p: 0.00035

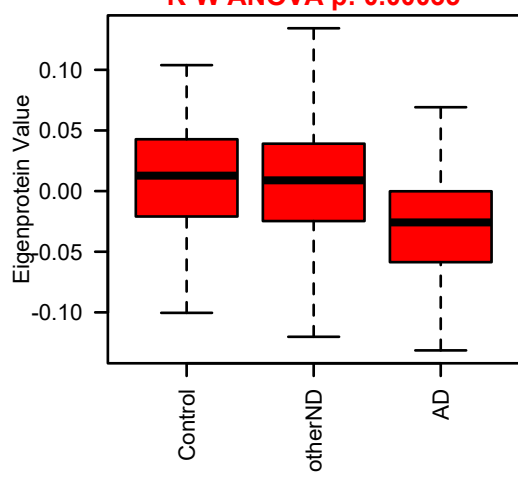

**bicor=-0.25, p=4.3e-05**  
**cor=-0.25, p=3.1e-05**

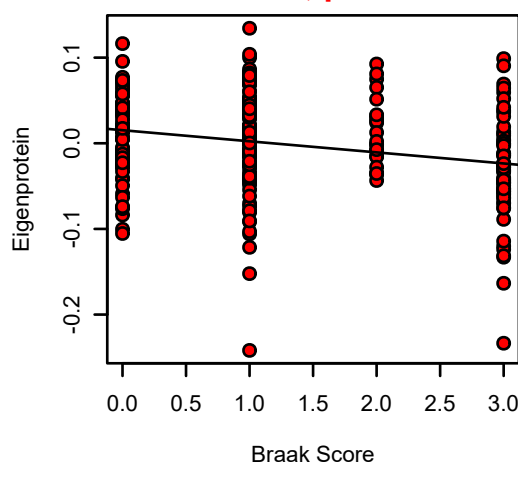

**bicor=-0.11, p=0.062**  
**cor=-0.11, p=0.053**

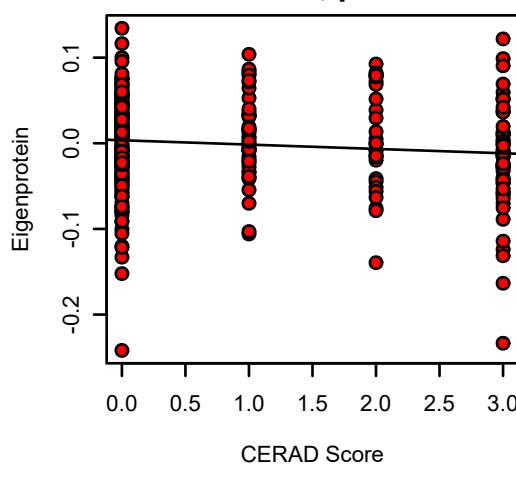

**M1 turquoise.Consensus**

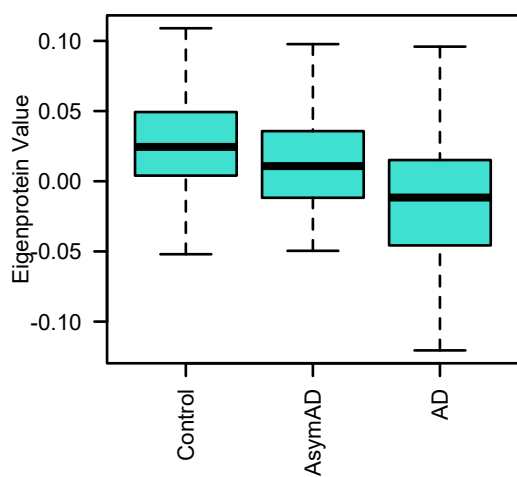

**M1 turquoise.UPenn Mixed (Synthetic Eigenprotein)**  
K-W ANOVA p: 8.5e-17

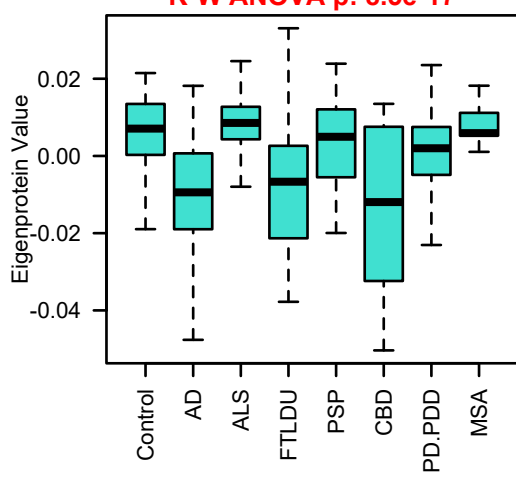

**M1 turquoise.UPenn Mixed (Synthetic Eigenprotein)**  
K-W ANOVA p: 6e-10

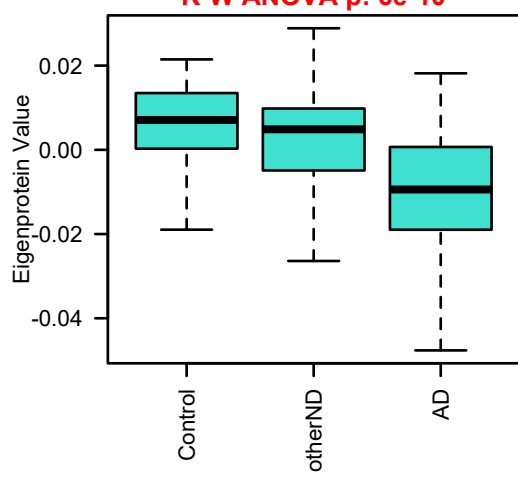

**bicor=-0.39, p=2.9e-11**  
**cor=-0.38, p=9.7e-11**

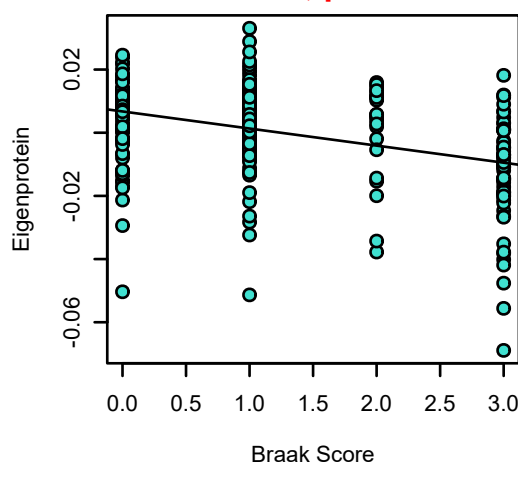

**bicor=-0.28, p=6.9e-07**  
**cor=-0.28, p=5.7e-07**

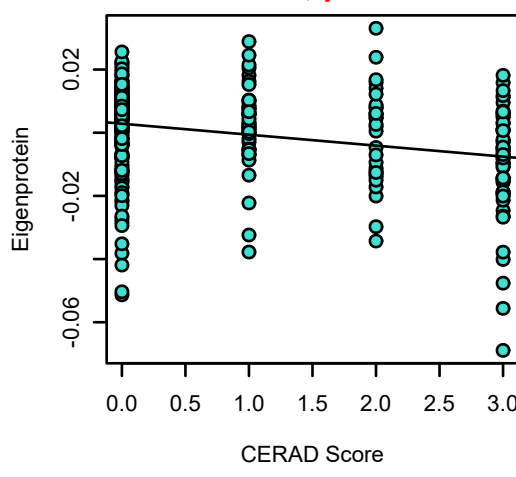

**M12 tan.Consensus**

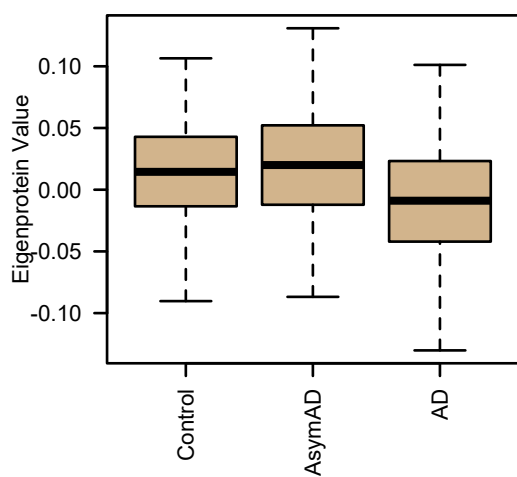

**M12 tan.UPenn Mixed (Synthetic Eigenprotein)**  
K-W ANOVA p: 1.4e-06

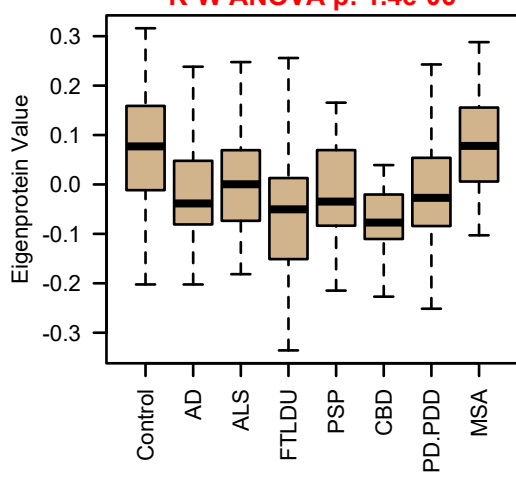

**M12 tan.UPenn Mixed (Synthetic Eigenprotein)**  
K-W ANOVA p: 1e-04

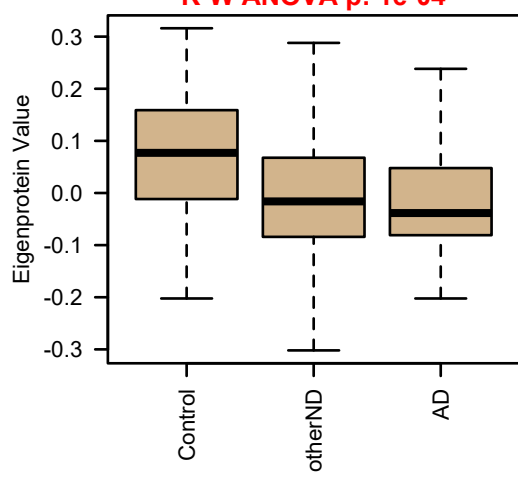

**bicor=-0.12, p=0.056**  
**cor=-0.12, p=0.048**

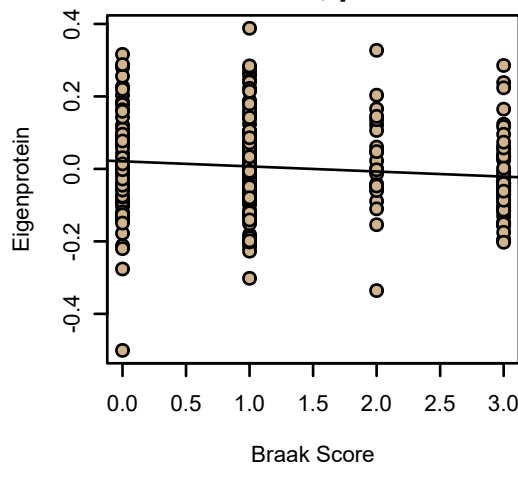

**bicor=-0.15, p=0.0073**  
**cor=-0.15, p=0.0083**

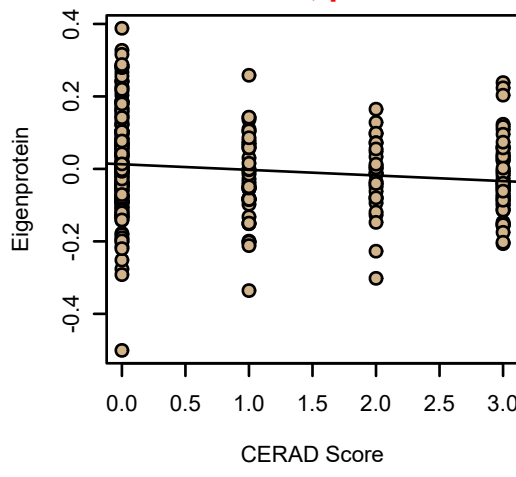

**M7 black.Consensus**

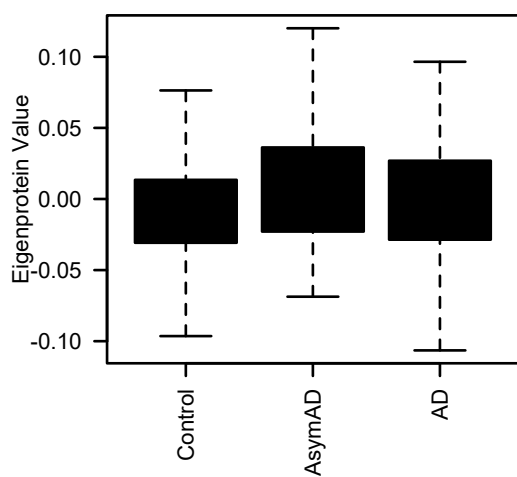

**M7 black.UPenn Mixed (Synthetic Eigenprotein)**  
K-W ANOVA p: 0.099

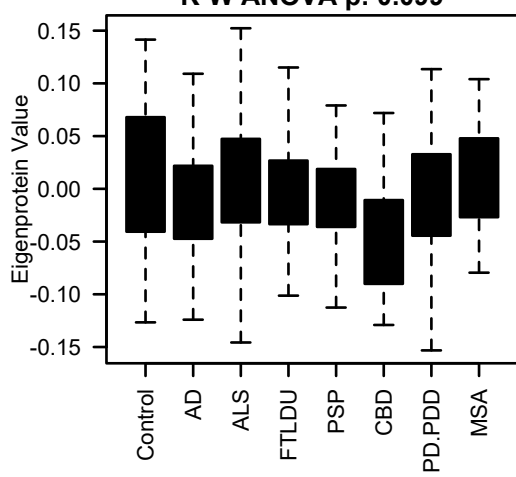

**M7 black.UPenn Mixed (Synthetic Eigenprotein)**  
K-W ANOVA p: 0.18

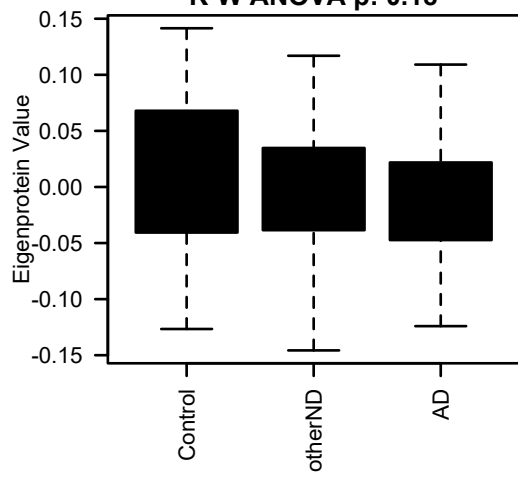

**bicor=-0.08, p=0.19**  
**cor=-0.075, p=0.22**

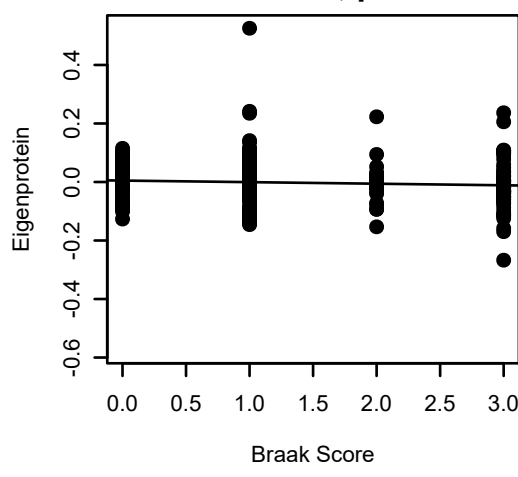

**bicor=-0.072, p=0.21**  
**cor=-0.054, p=0.34**

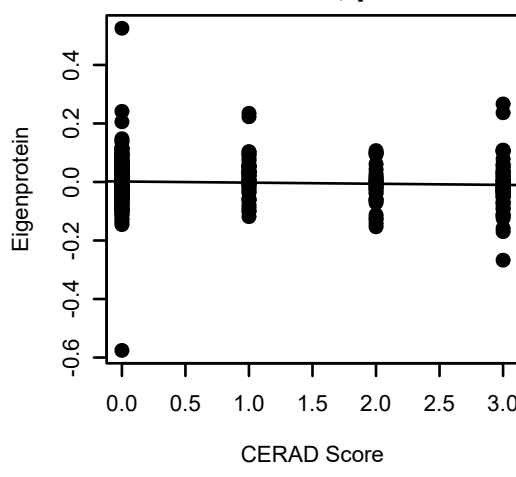

**M9 magenta.Consensus**

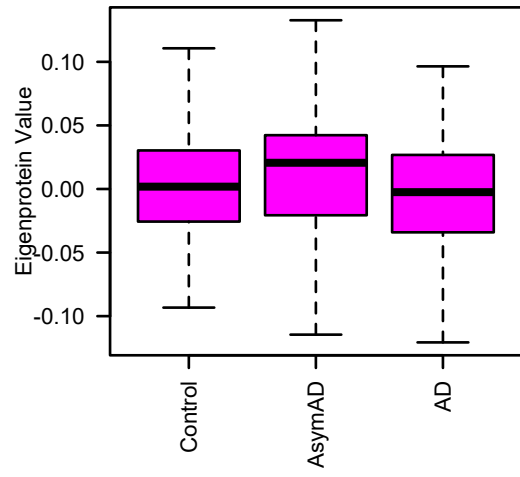

**M9 magenta.UPenn Mixed  
(Synthetic Eigenprotein)  
K-W ANOVA p: 0.017**

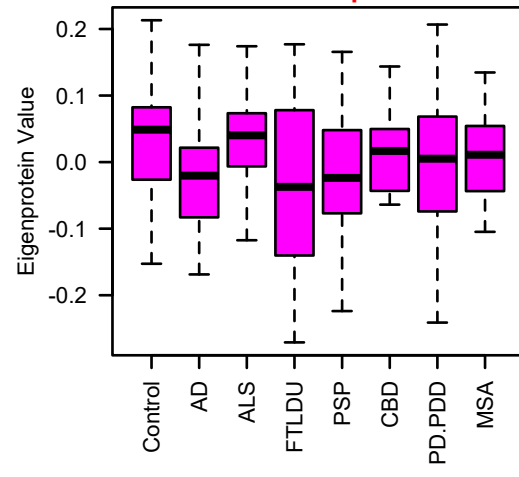

**M9 magenta.UPenn Mixed  
(Synthetic Eigenprotein)  
K-W ANOVA p: 0.073**

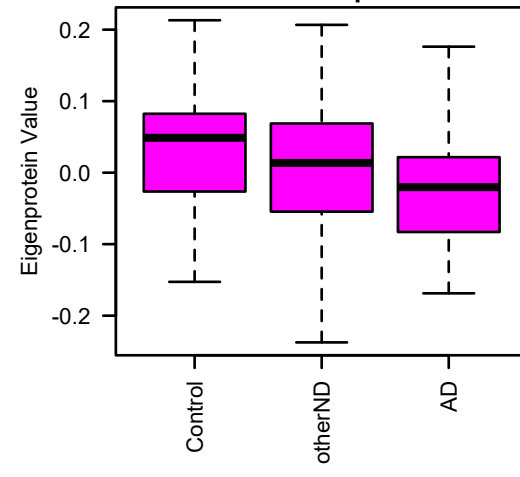

**bicor=-0.17, p=0.0055  
cor=-0.12, p=0.048**

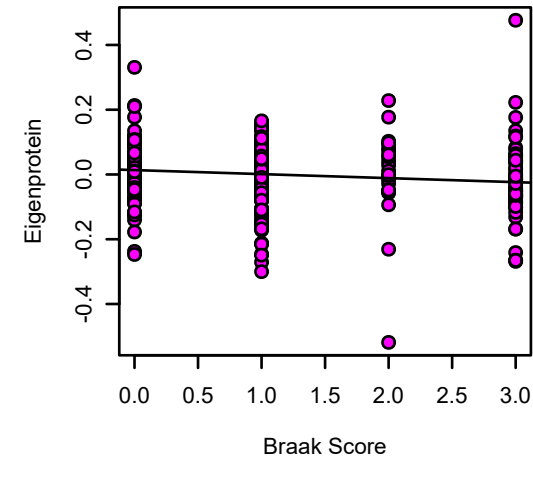

**bicor=-0.09, p=0.11  
cor=-0.035, p=0.54**

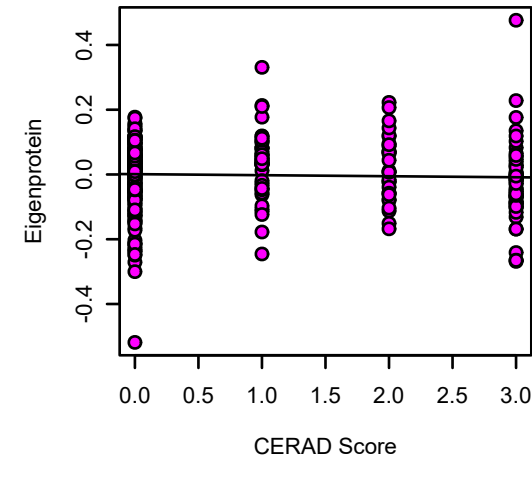

**HDGFRP3 UPenn Mixed PRM**  
**M10 purple MEGA module member**  
**K-W ANOVA p: 0.01**

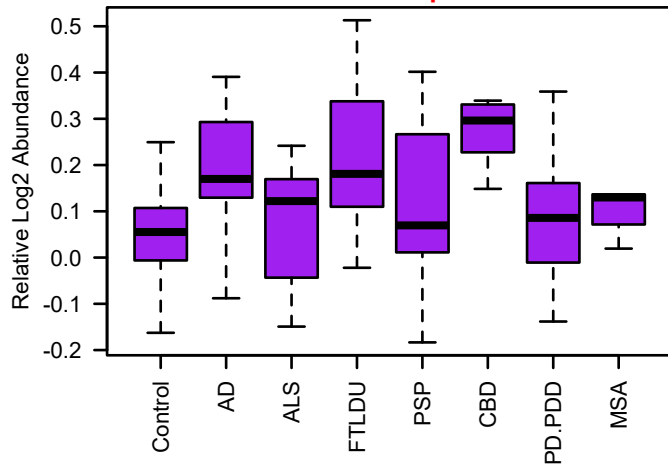

**HDGFRP3 UPenn Mixed PRM**  
**K-W ANOVA p: 0.02**

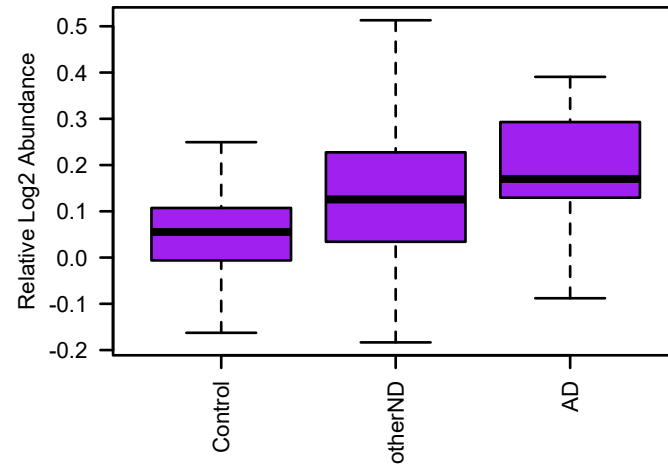

**bicor=0.26, p=0.017**  
**cor=0.28, p=0.0099**

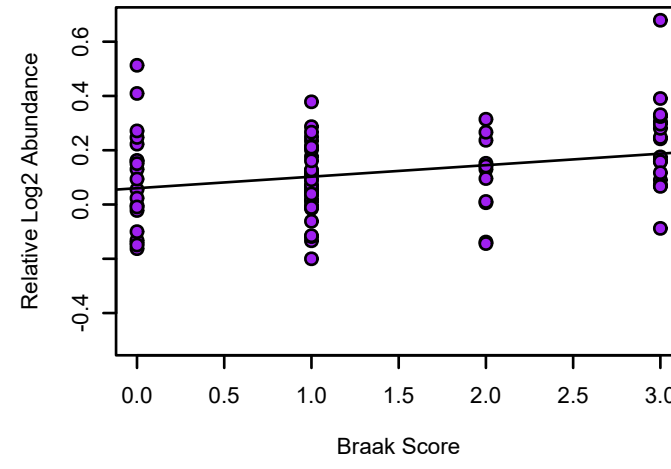

**bicor=0.15, p=0.14**  
**cor=0.18, p=0.073**

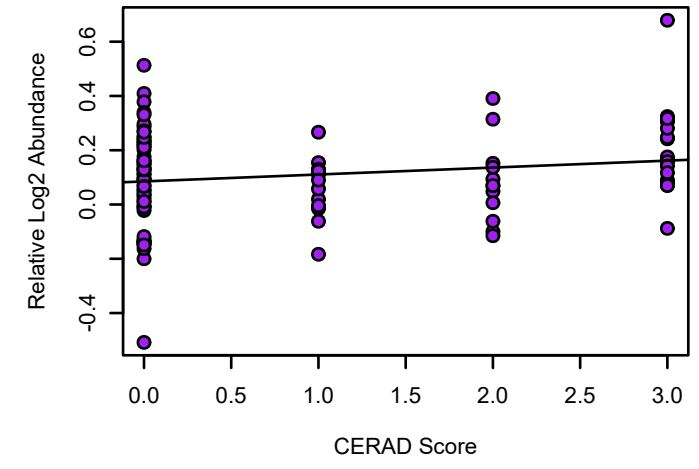

**RPS9 UPenn Mixed PRM**  
**M7 black MEGA module member**  
**K-W ANOVA p: 0.19**

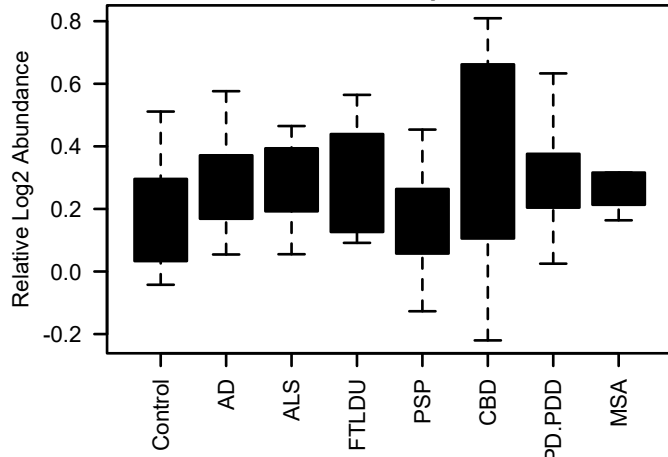

**RPS9 UPenn Mixed PRM**  
**K-W ANOVA p: 0.47**

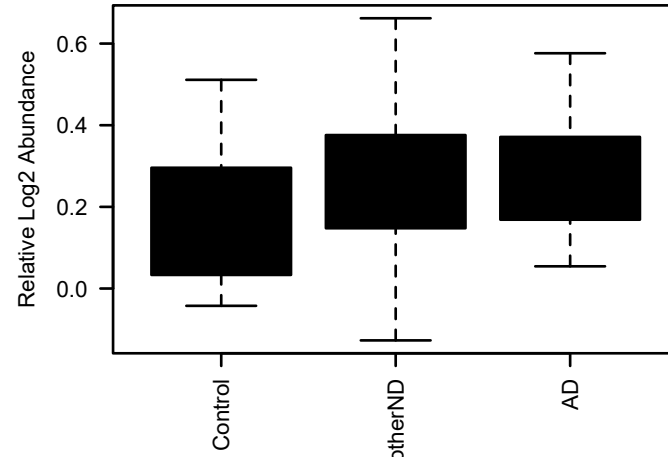

**bicor=0.075, p=0.5**  
**cor=0.11, p=0.32**

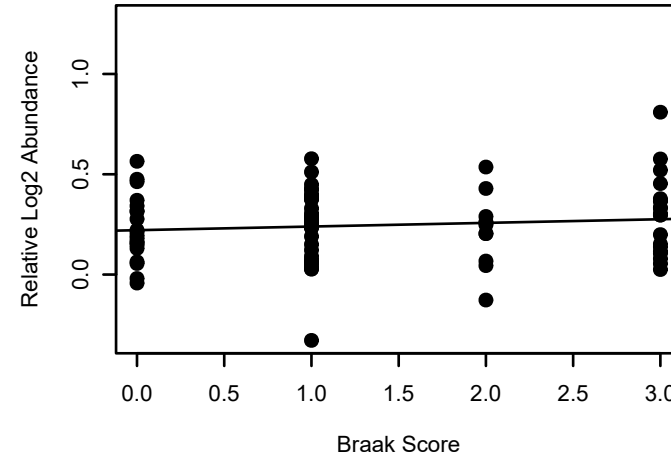

**bicor=0.084, p=0.41**  
**cor=0.054, p=0.59**

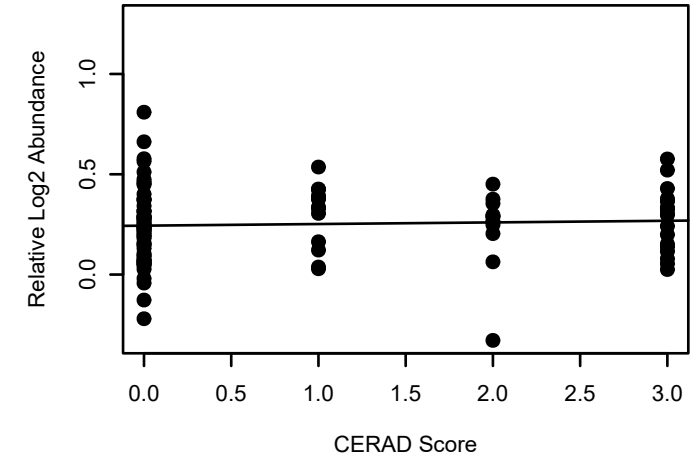

**KHSRP UPenn Mixed PRM**  
**M10 purple MEGA module member**  
**K-W ANOVA p: 0.054**

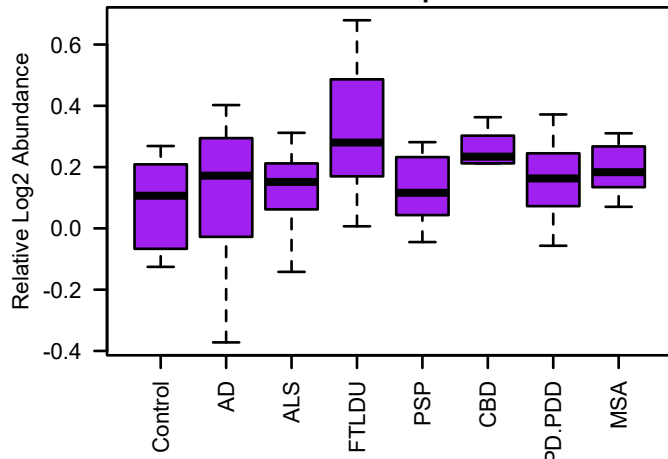

**KHSRP UPenn Mixed PRM**  
**K-W ANOVA p: 0.37**

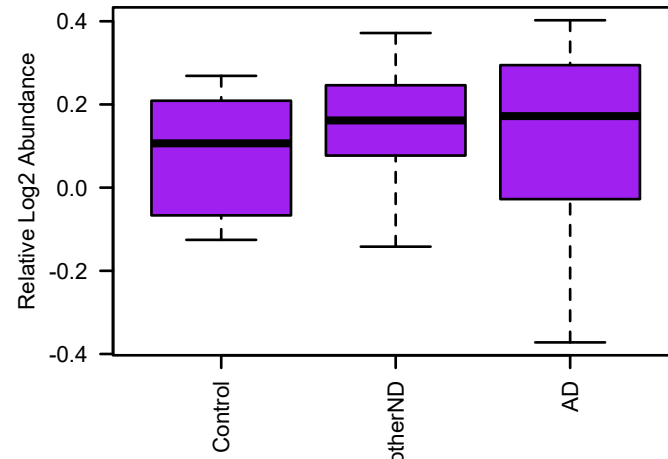

**bicor=0.034, p=0.76**  
**cor=0.09, p=0.42**

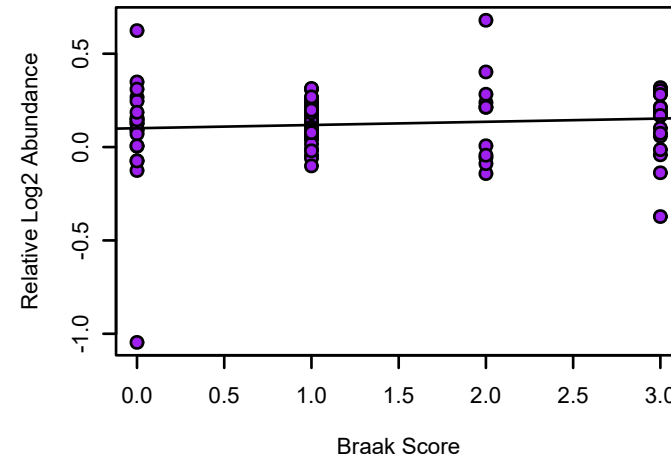

**bicor=-0.027, p=0.79**  
**cor=-0.0026, p=0.98**

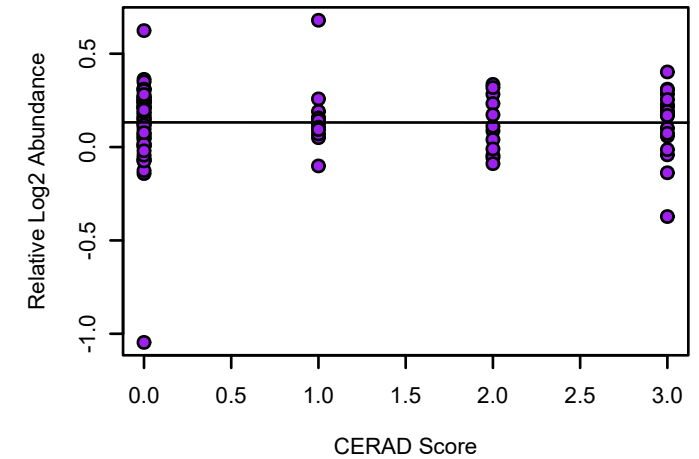

**LLGL1 UPenn Mixed PRM**  
**M2 blue MEGA module member**  
**K-W ANOVA p: 3.9e-05**

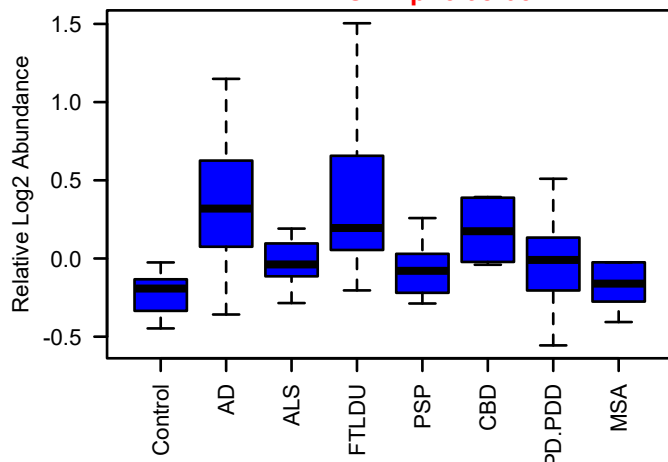

**LLGL1 UPenn Mixed PRM**  
**K-W ANOVA p: 3.3e-05**

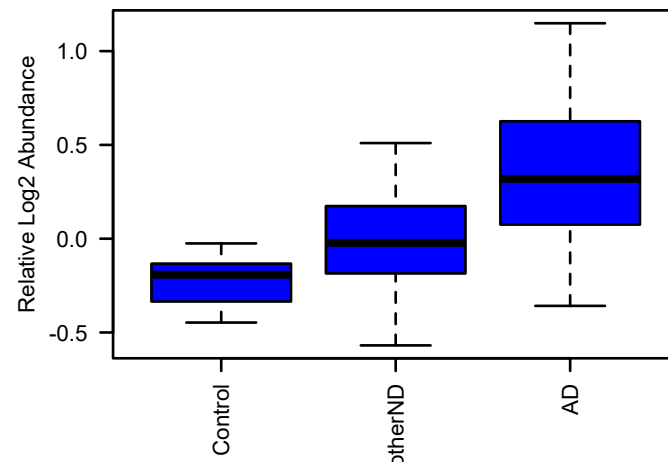

**bicor=0.44, p=2.3e-05**  
**cor=0.41, p=0.00011**

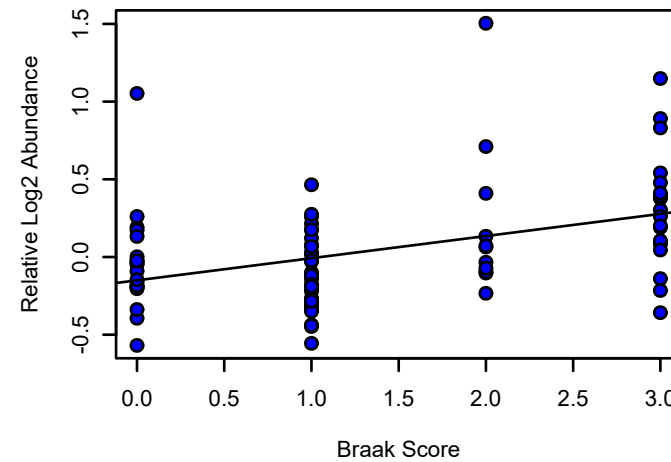

**bicor=0.36, p=0.00027**  
**cor=0.34, p=0.00054**

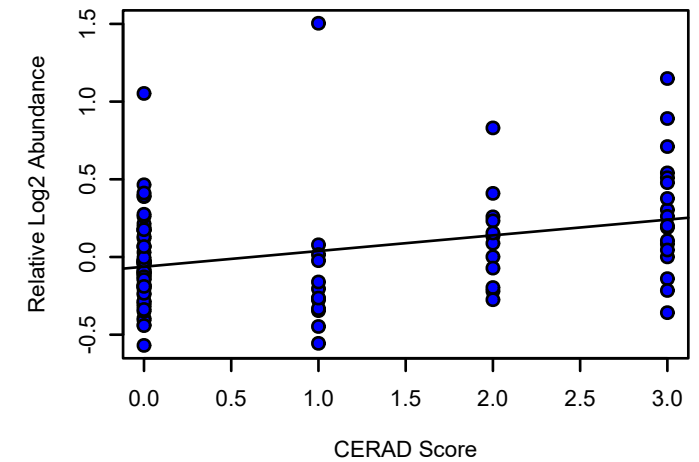



**SYN2 UPenn Mixed PRM**  
**M1 turquoise MEGA module member**  
**K-W ANOVA p: 0.015**

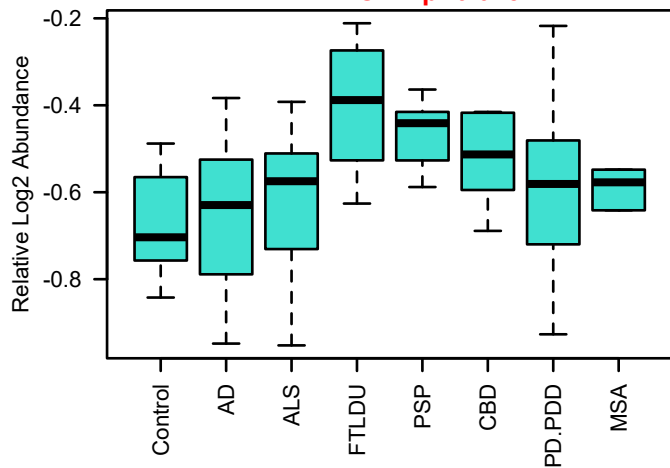

**SYN2 UPenn Mixed PRM**  
**K-W ANOVA p: 0.0095**

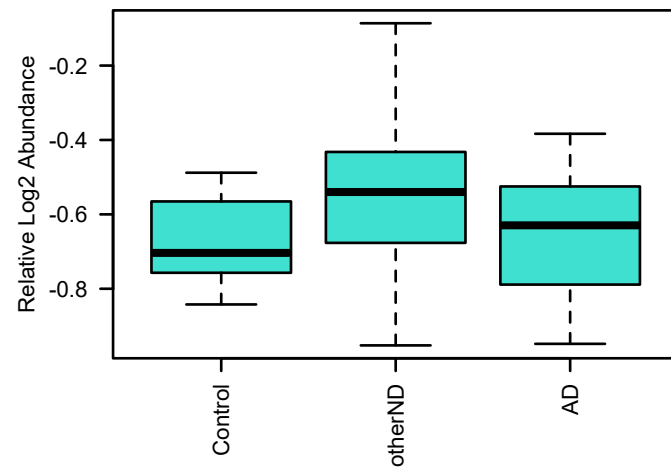

**bicor=-0.096, p=0.39**  
**cor=-0.072, p=0.52**

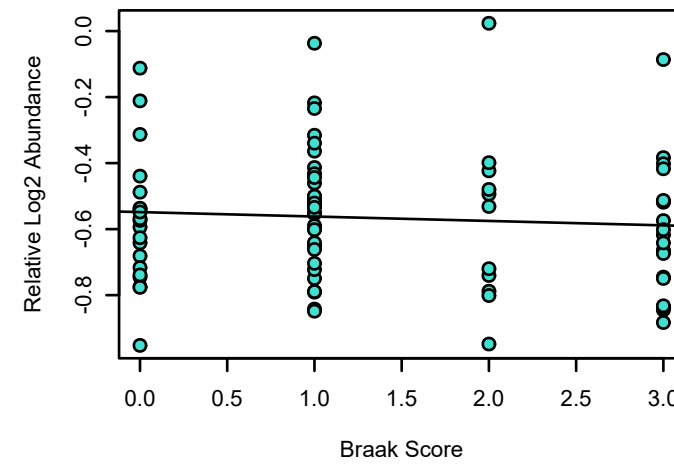

**bicor=-0.088, p=0.39**  
**cor=-0.074, p=0.46**

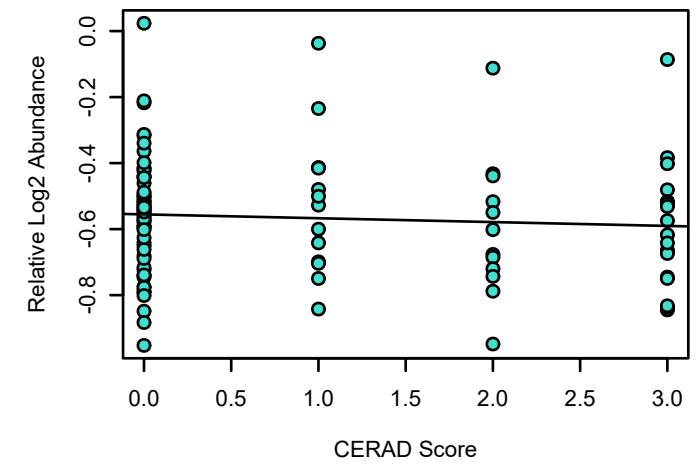

**NDUFA10 UPenn Mixed PRM**  
**M3 brown MEGA module member**  
**K-W ANOVA p: 0.00018**

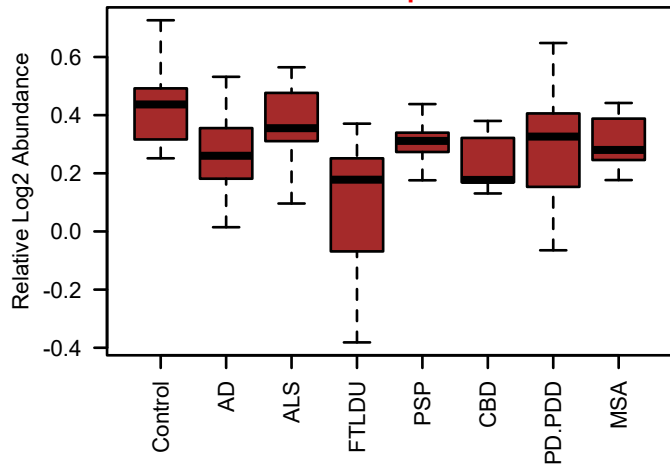

**NDUFA10 UPenn Mixed PRM**  
**K-W ANOVA p: 0.0065**

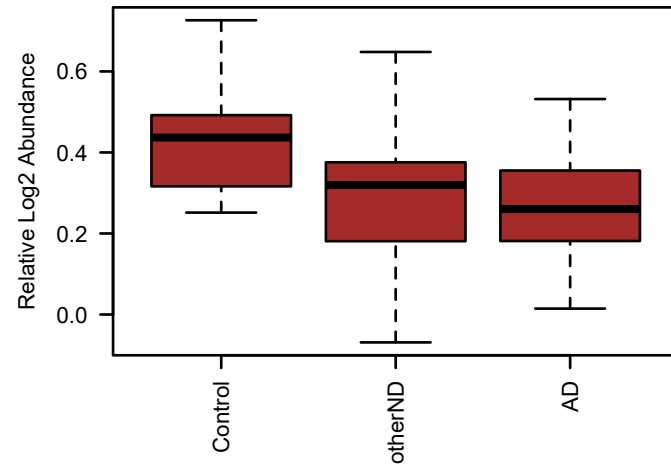

**bicor=-0.19, p=0.082**  
**cor=-0.17, p=0.12**

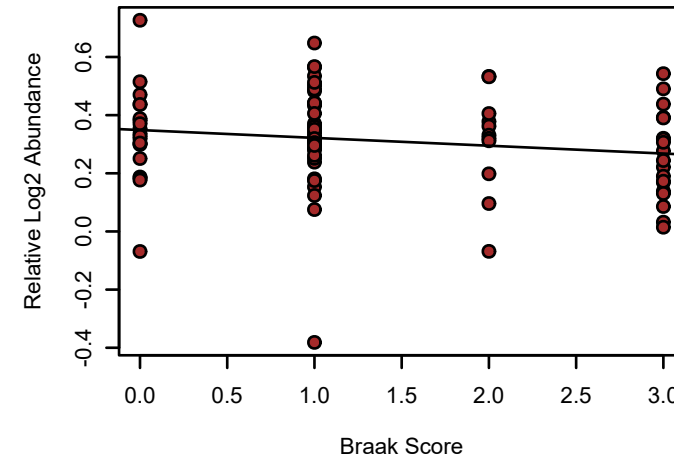

**bicor=-0.21, p=0.033**  
**cor=-0.19, p=0.058**

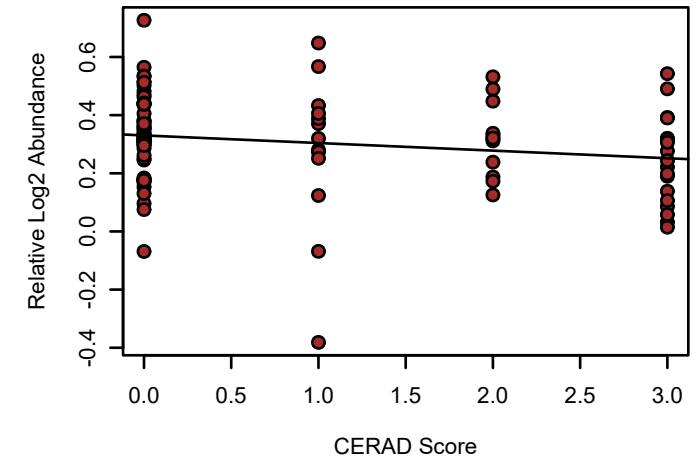

**AP2M1 UPenn Mixed PRM**  
**M1 turquoise MEGA module member**  
**K-W ANOVA p: 0.00079**

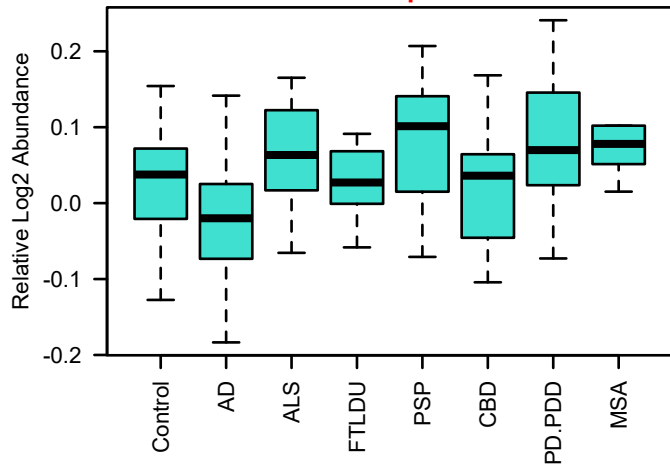

**AP2M1 UPenn Mixed PRM**  
**K-W ANOVA p: 5e-05**

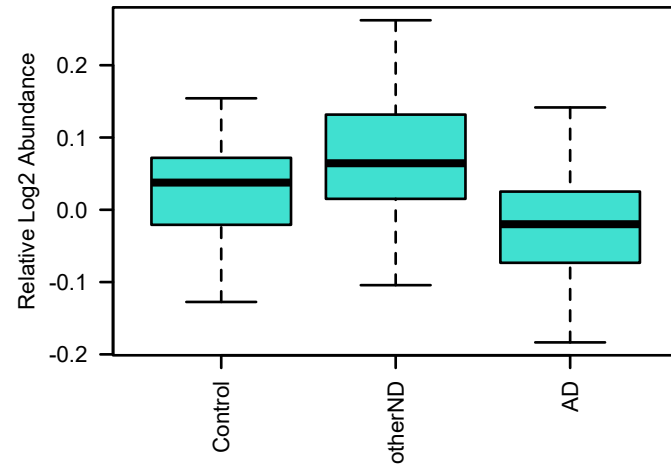

**bicor=-0.16, p=0.14**  
**cor=-0.19, p=0.083**

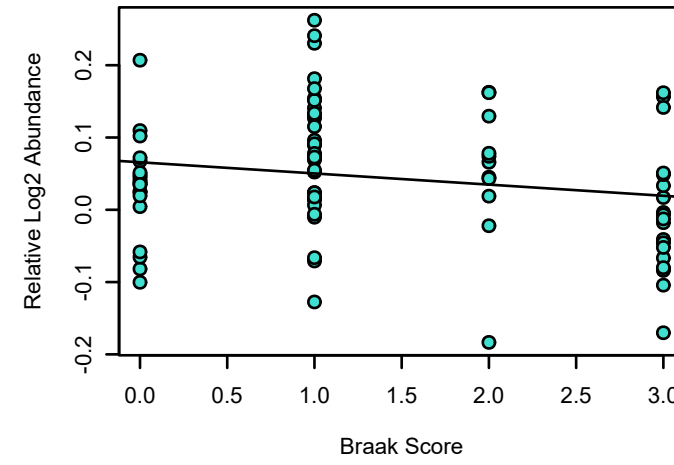

**bicor=-0.21, p=0.037**  
**cor=-0.21, p=0.036**

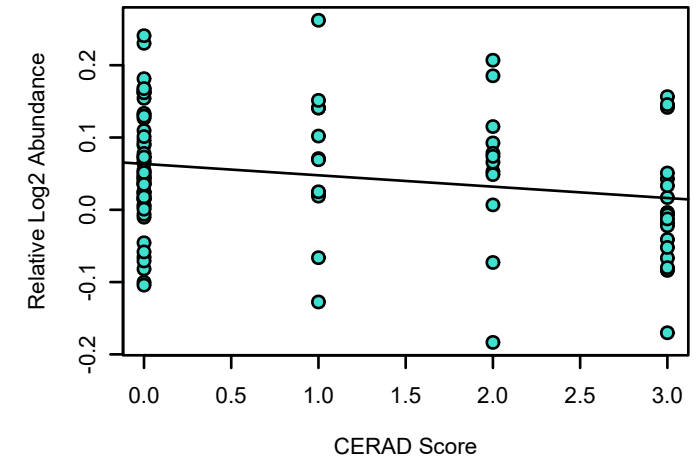

**HNRNPM UPenn Mixed PRM**  
**M10 purple MEGA module member**  
**K-W ANOVA p: 4.7e-05**

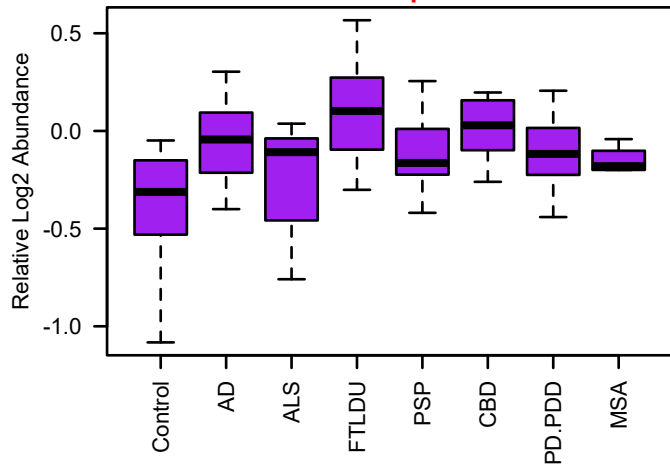

**HNRNPM UPenn Mixed PRM**  
**K-W ANOVA p: 8.1e-05**

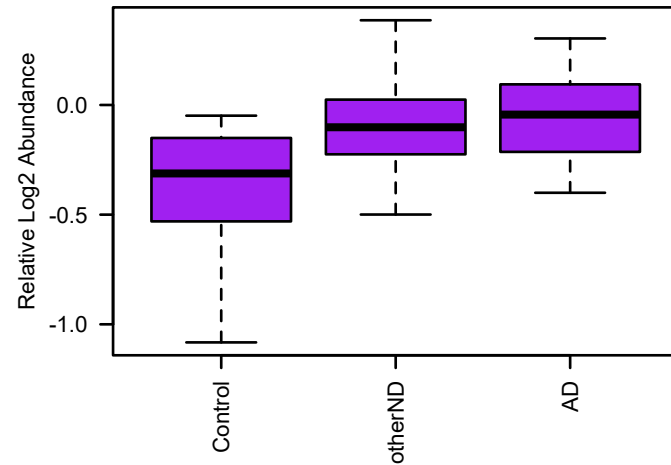

**bicor=0.25, p=0.021**  
**cor=0.31, p=0.0041**

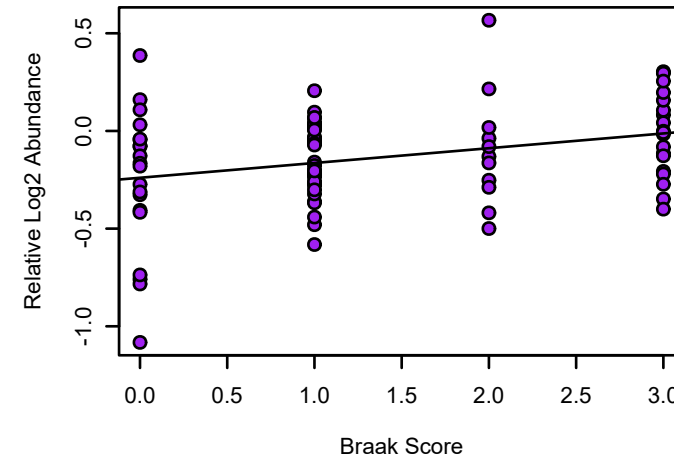

**bicor=0.13, p=0.18**  
**cor=0.16, p=0.11**

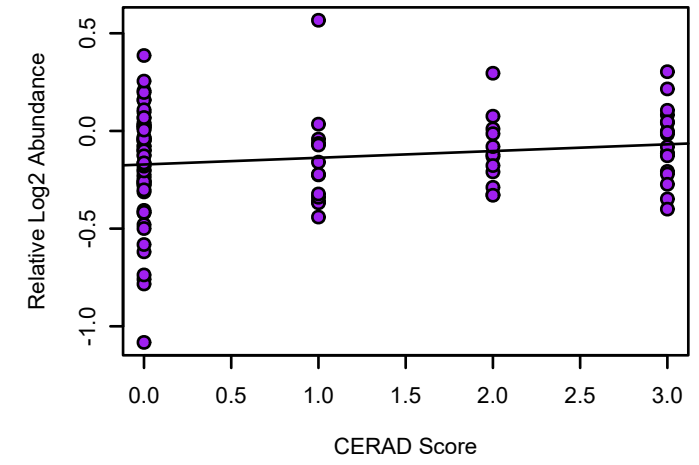

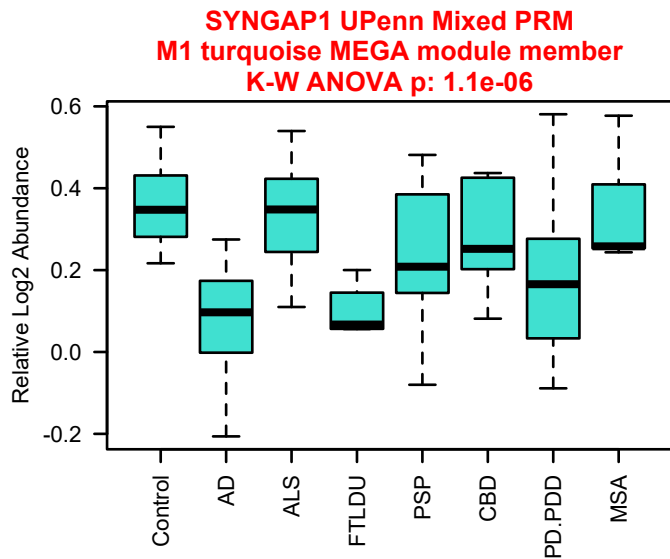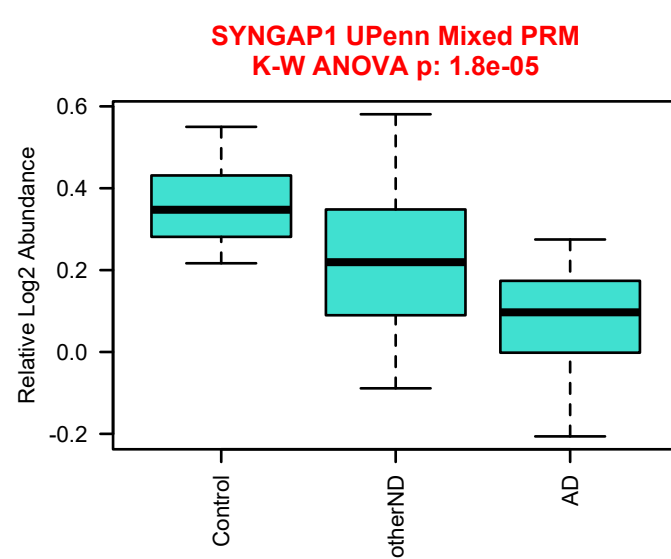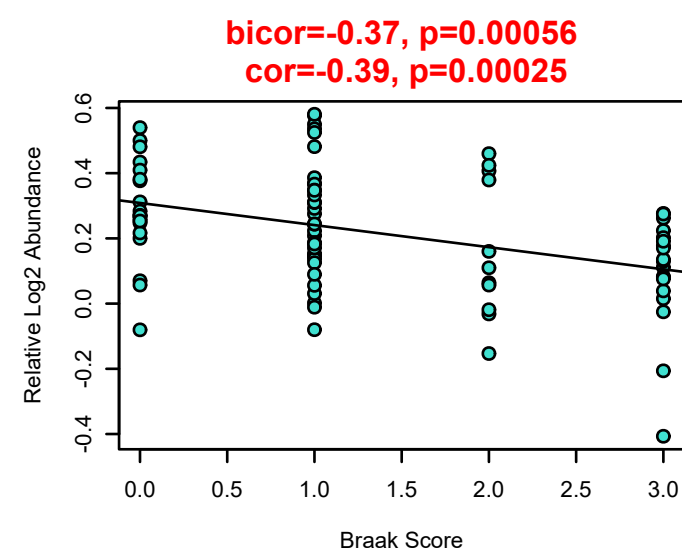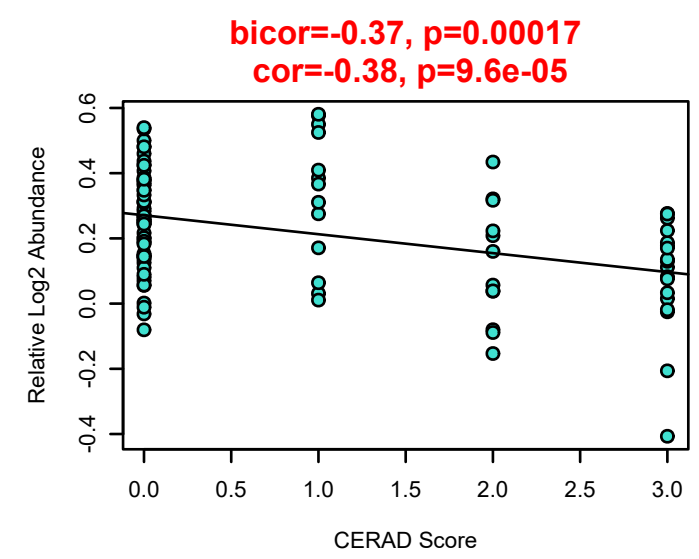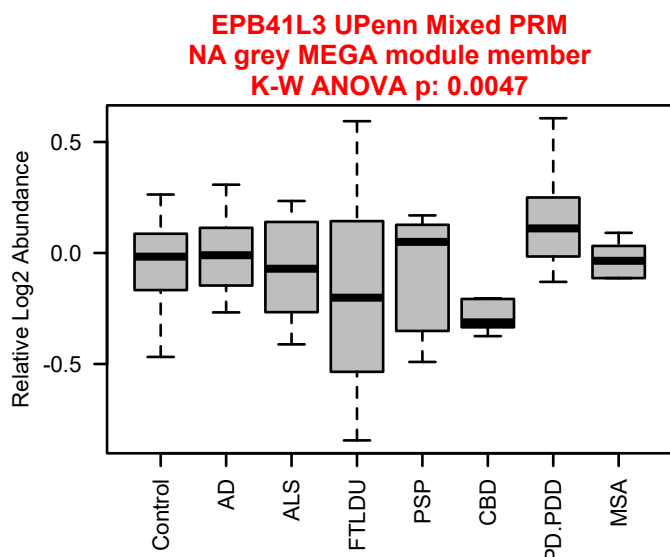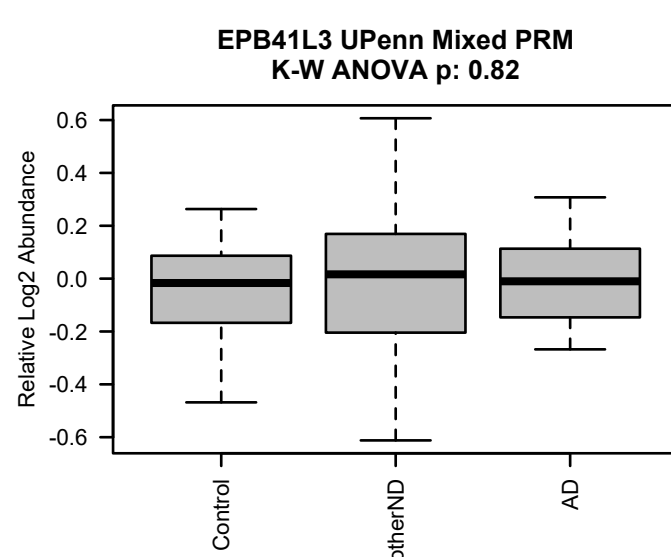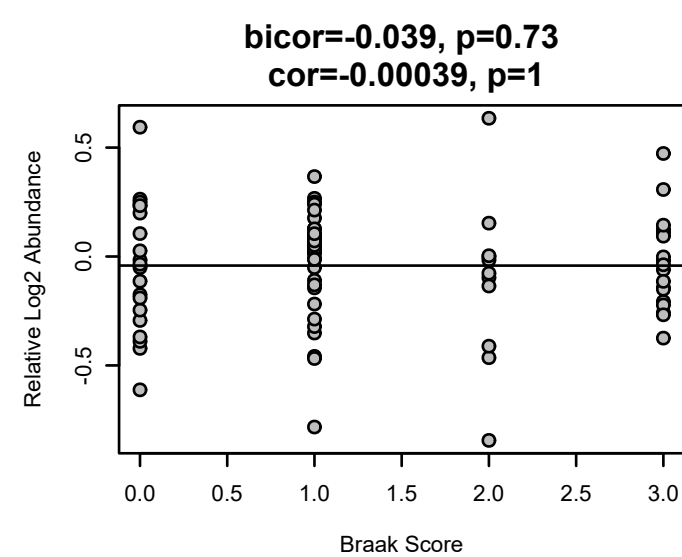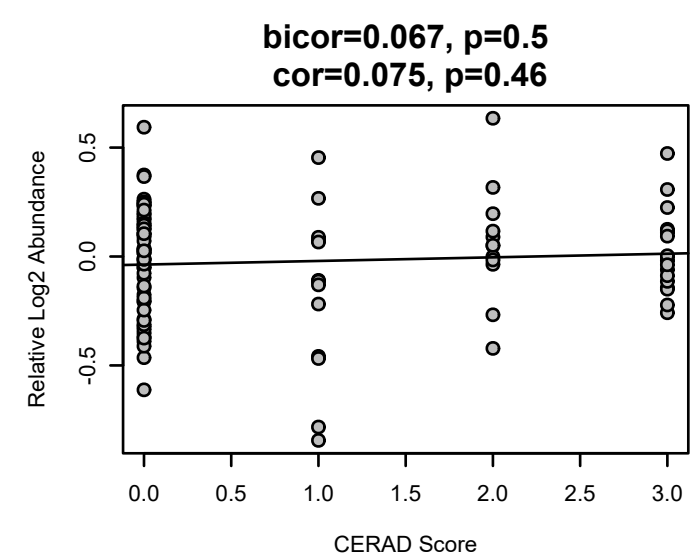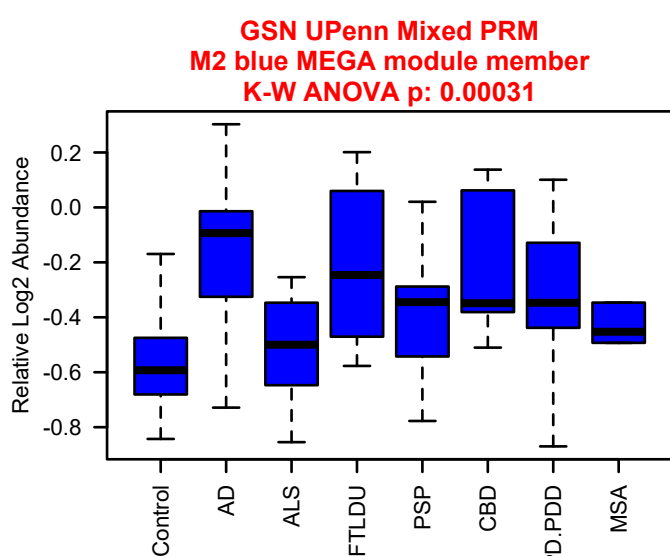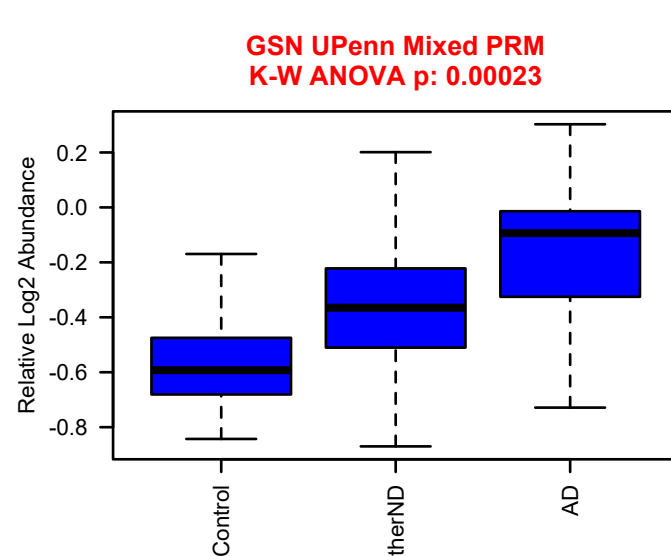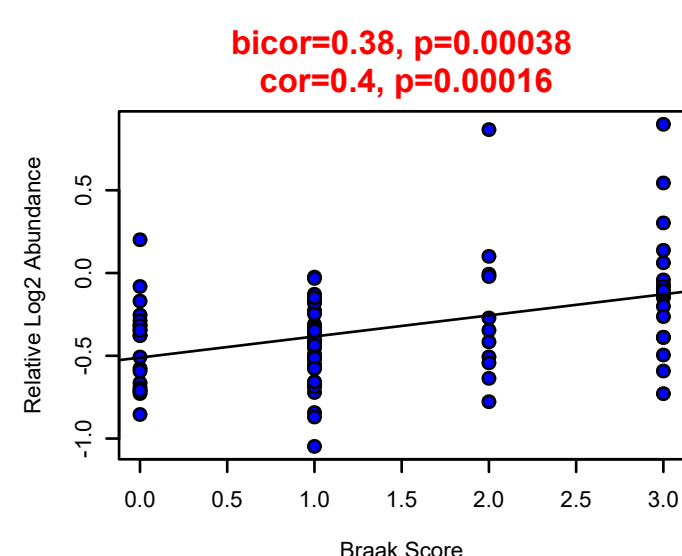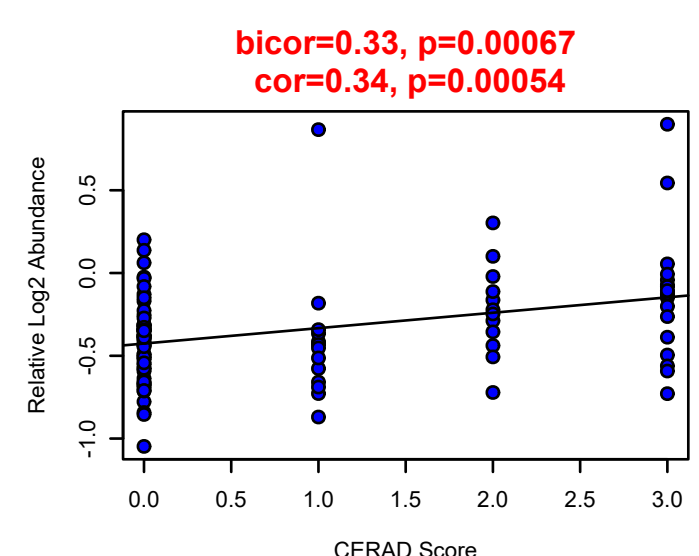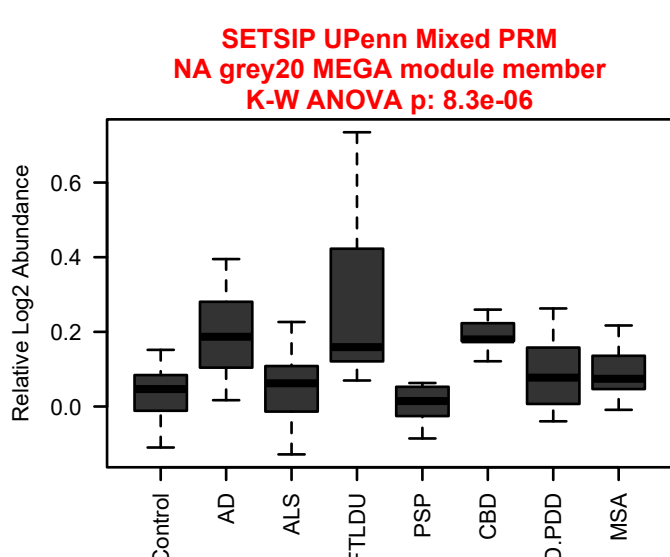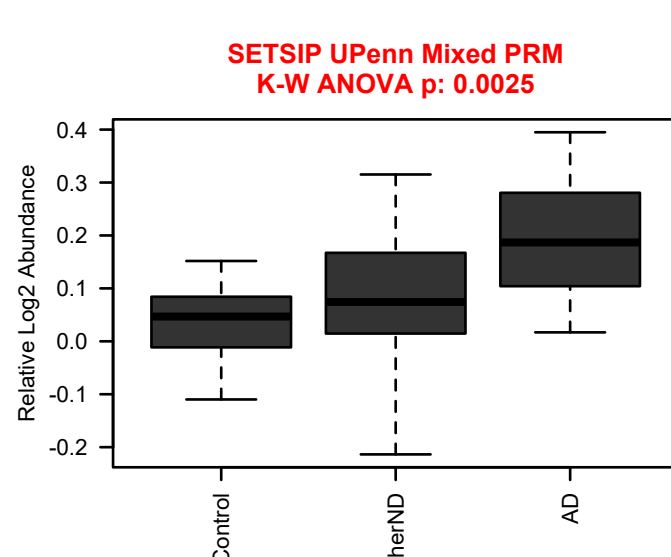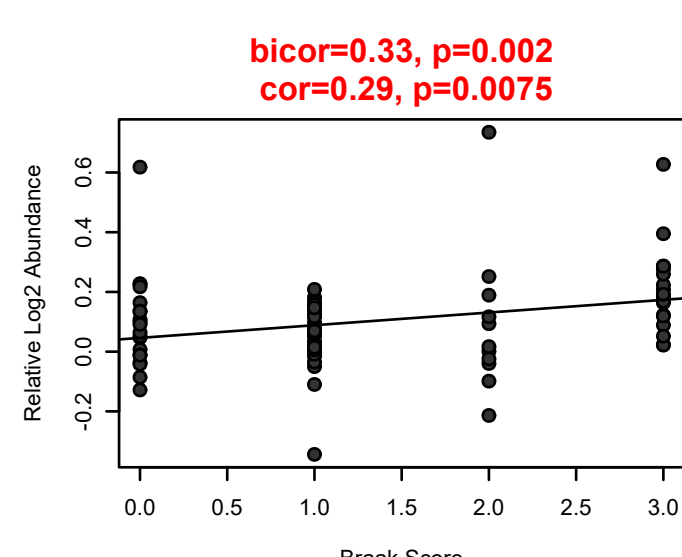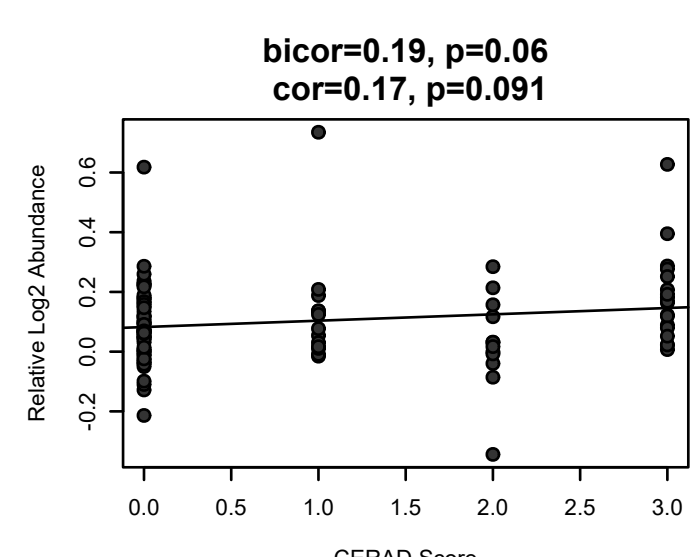

**SET UPenn Mixed PRM**  
M10 purple MEGA module member  
K-W ANOVA p: 0.76

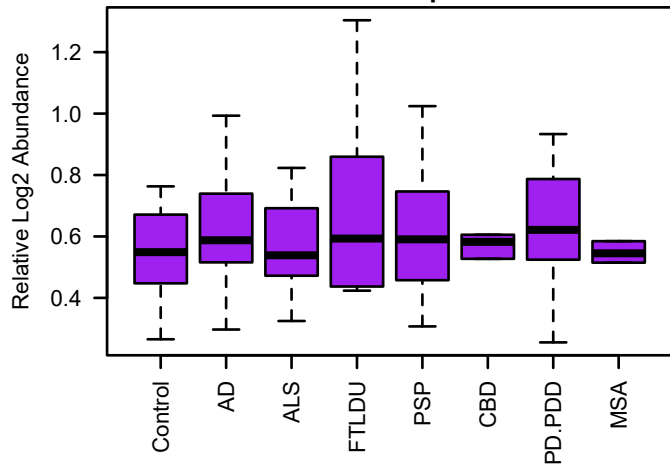

**SET UPenn Mixed PRM**  
K-W ANOVA p: 0.32

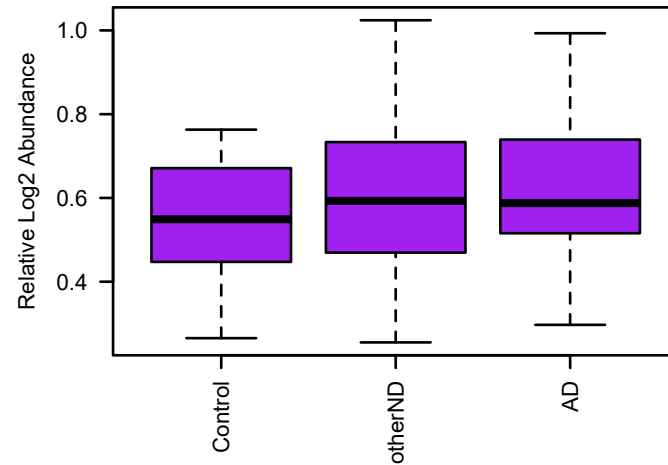

**bicor=0.12, p=0.28**  
**cor=0.054, p=0.63**

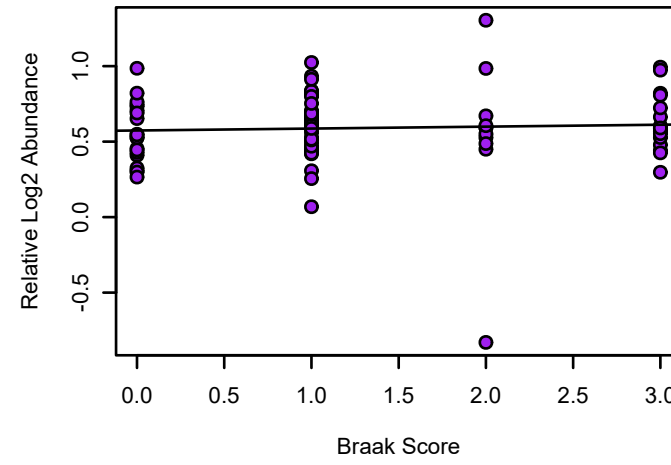

**bicor=0.082, p=0.41**  
**cor=0.015, p=0.88**

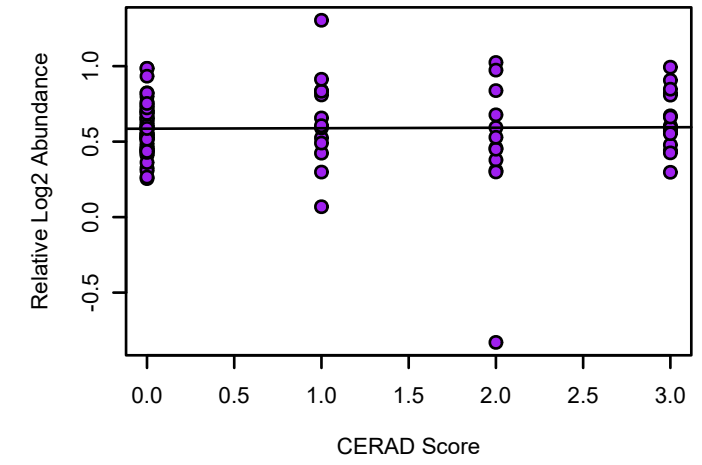

**NDUFA6 UPenn Mixed PRM**  
M3 brown MEGA module member  
K-W ANOVA p: 0.005

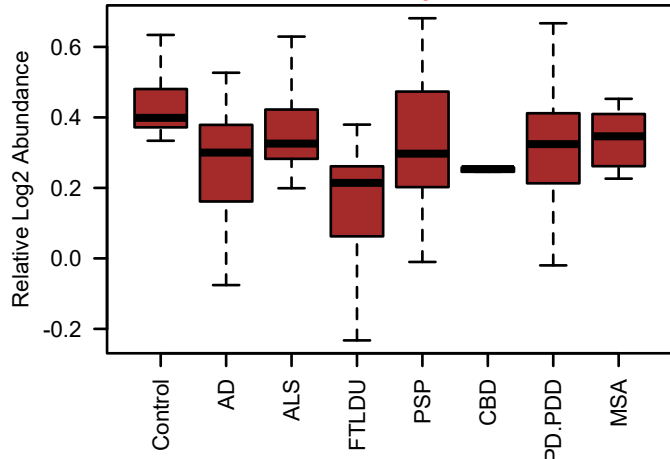

**NDUFA6 UPenn Mixed PRM**  
K-W ANOVA p: 0.014

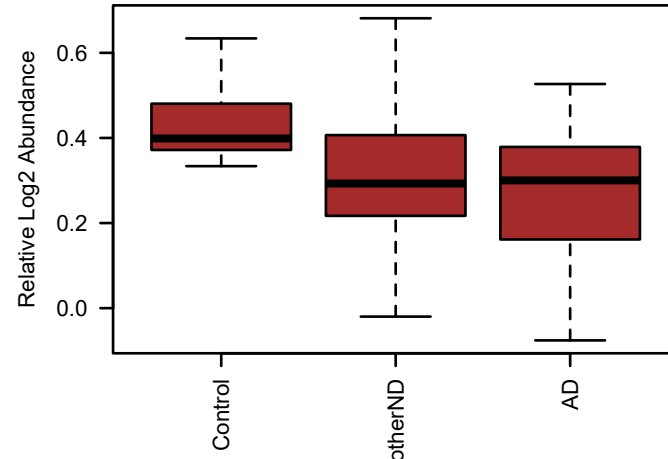

**bicor=-0.22, p=0.043**  
**cor=-0.19, p=0.083**

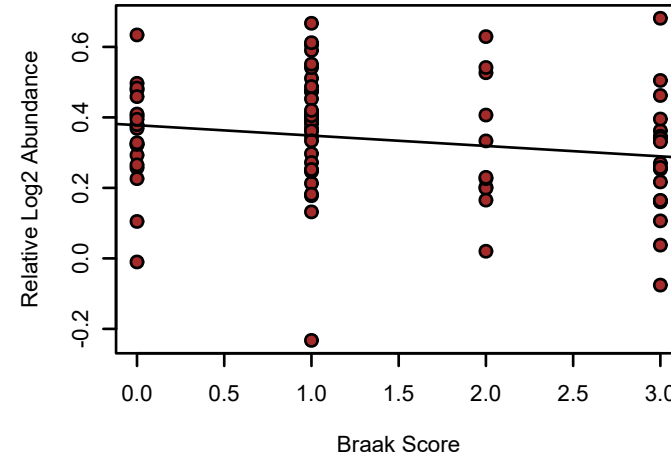

**bicor=-0.3, p=0.0023**  
**cor=-0.29, p=0.0034**

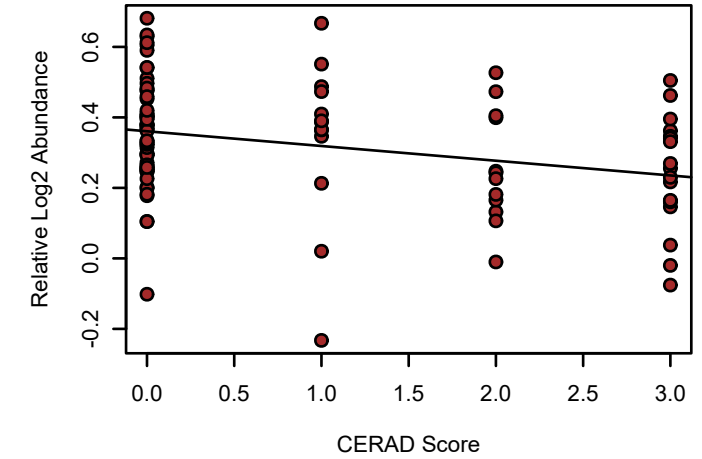

**SPTAN1 UPenn Mixed PRM**  
NA grey MEGA module member  
K-W ANOVA p: 0.0062

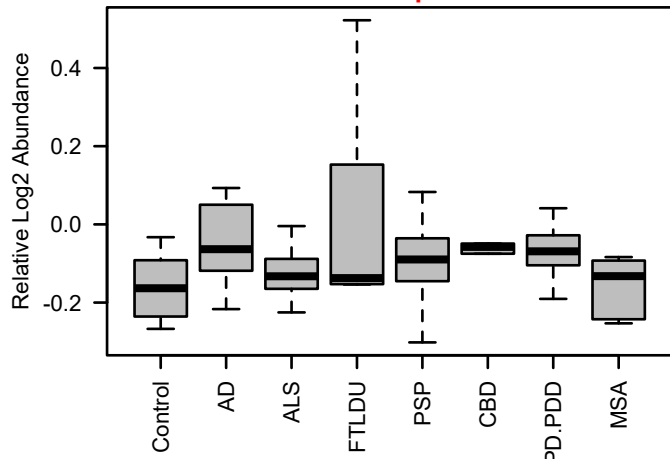

**SPTAN1 UPenn Mixed PRM**  
K-W ANOVA p: 0.027

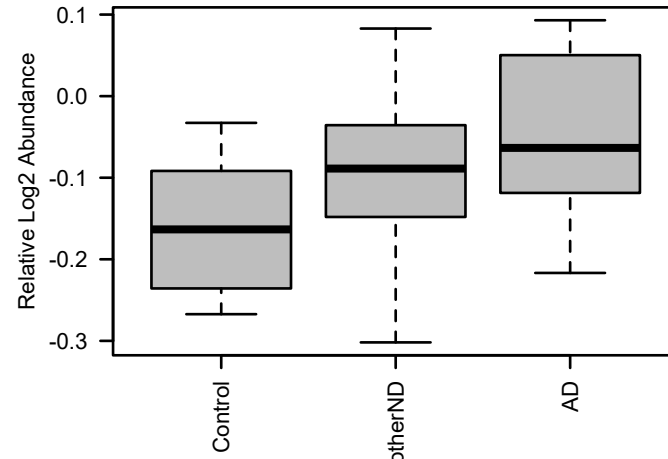

**bicor=0.27, p=0.012**  
**cor=0.21, p=0.055**

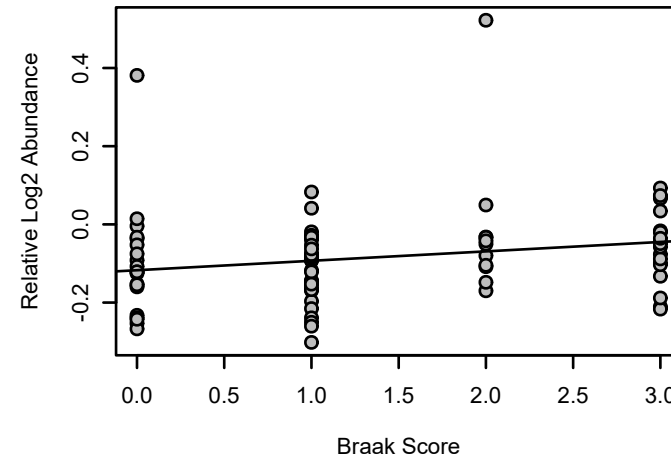

**bicor=0.26, p=0.0094**  
**cor=0.18, p=0.073**

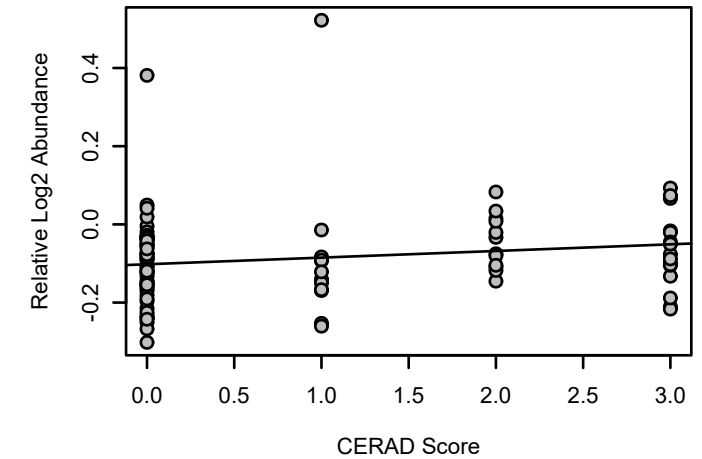

**MATR3 UPenn Mixed PRM**  
M10 purple MEGA module member  
K-W ANOVA p: 0.29

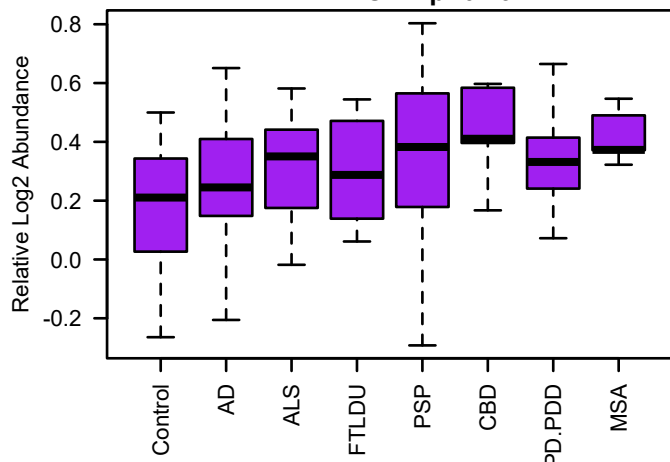

**MATR3 UPenn Mixed PRM**  
K-W ANOVA p: 0.068

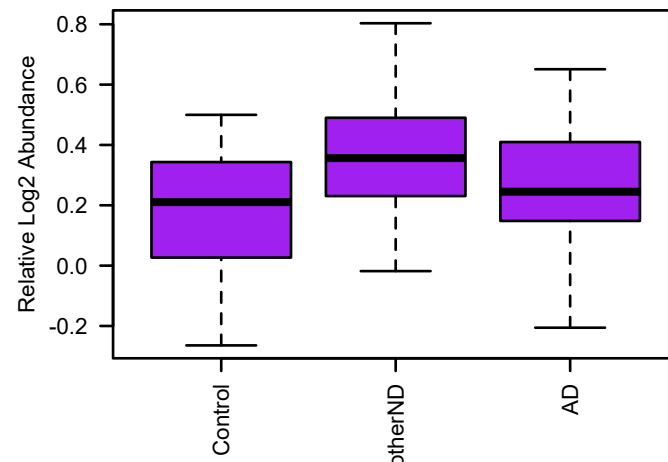

**bicor=0.026, p=0.82**  
**cor=0.11, p=0.32**

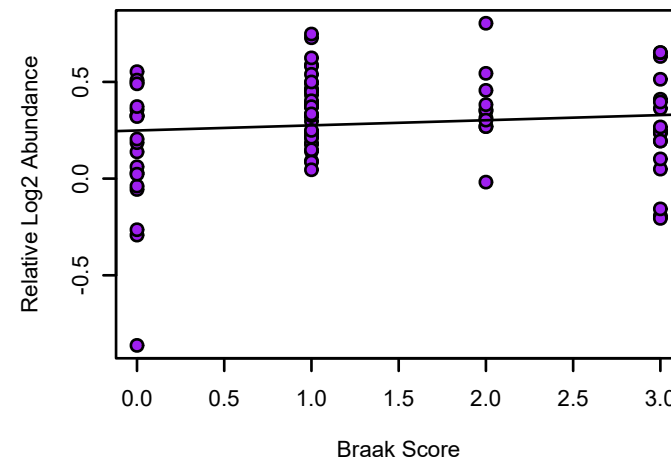

**bicor=-0.12, p=0.23**  
**cor=-0.081, p=0.42**

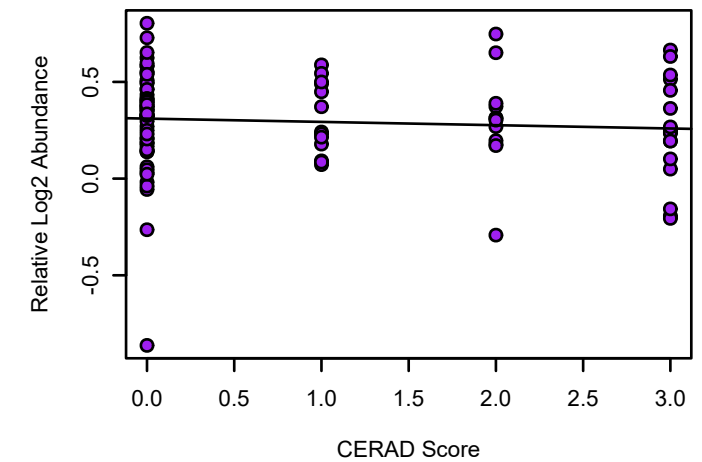

**DNM1 UPenn Mixed PRM**  
M1 turquoise MEGA module member  
K-W ANOVA p: 0.022

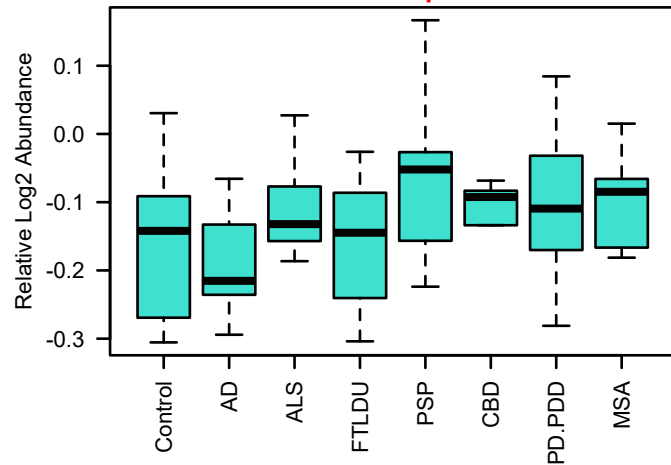

**DNM1 UPenn Mixed PRM**  
K-W ANOVA p: 0.0033

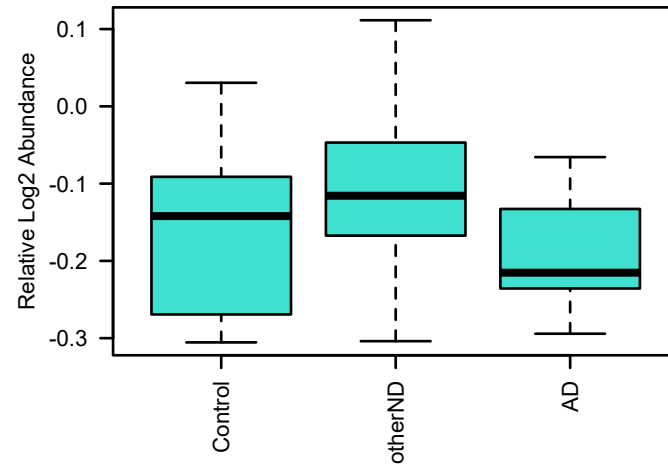

**bicor=-0.094, p=0.39**  
**cor=-0.092, p=0.41**

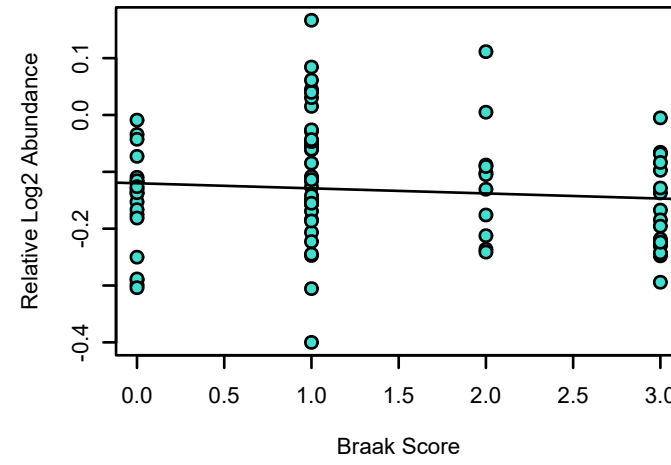

**bicor=-0.13, p=0.2**  
**cor=-0.11, p=0.28**

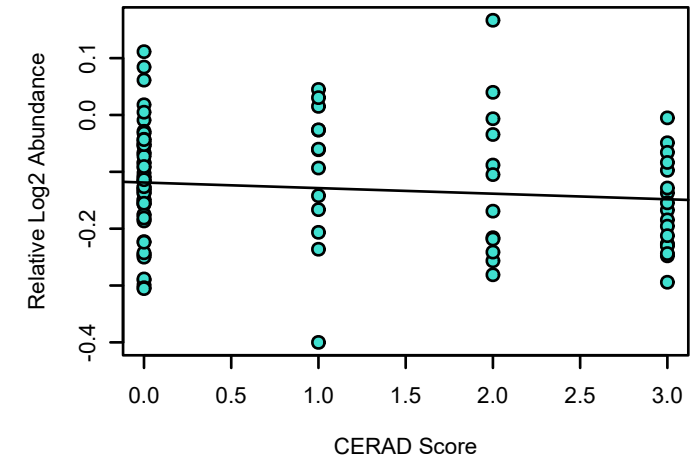

**STXBP1 UPenn Mixed PRM**  
M1 turquoise MEGA module member  
K-W ANOVA p: 0.0046

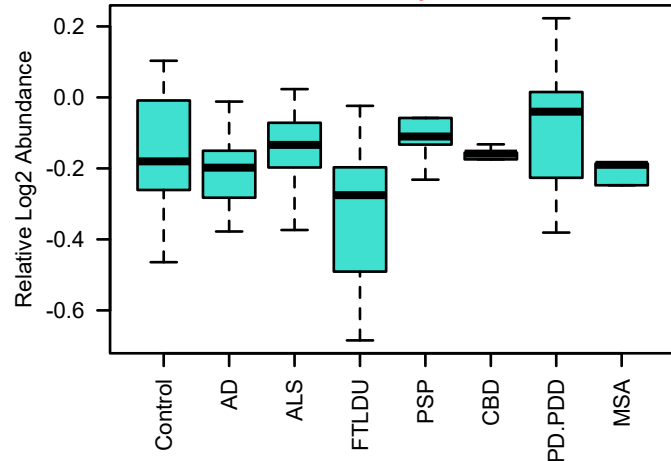

**STXBP1 UPenn Mixed PRM**  
K-W ANOVA p: 0.4

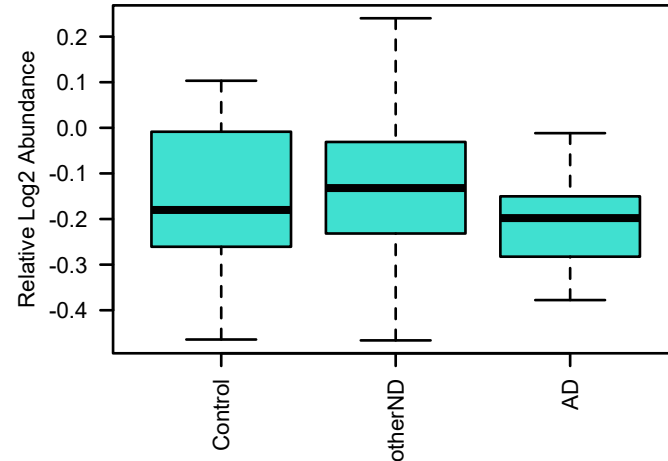

**bicor=-0.083, p=0.45**  
**cor=-0.075, p=0.5**

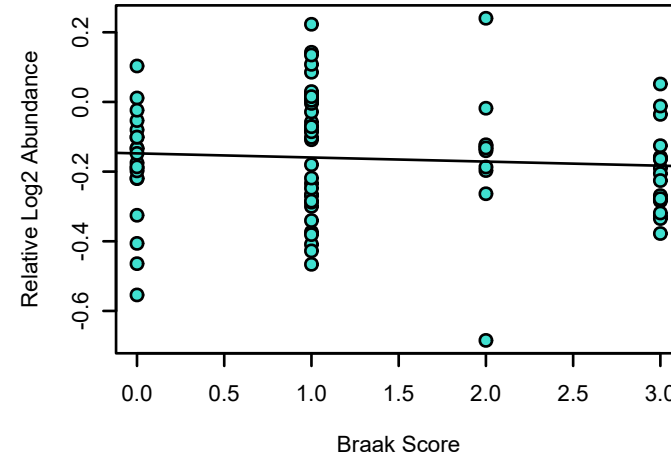

**bicor=-0.07, p=0.49**  
**cor=-0.067, p=0.51**

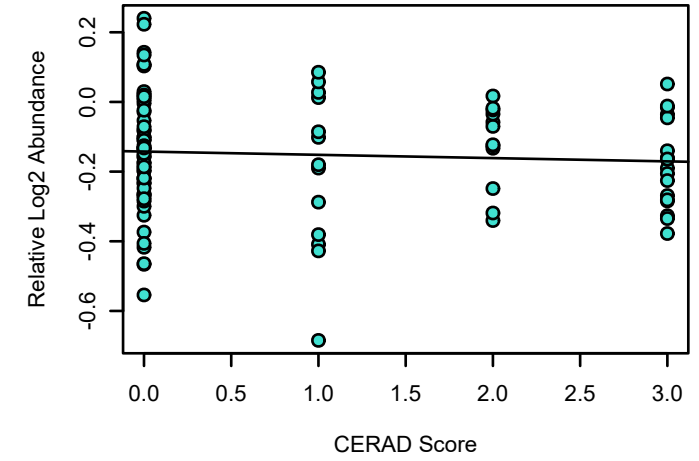

**GABRA1 UPenn Mixed PRM**  
M3 brown MEGA module member  
K-W ANOVA p: 0.37

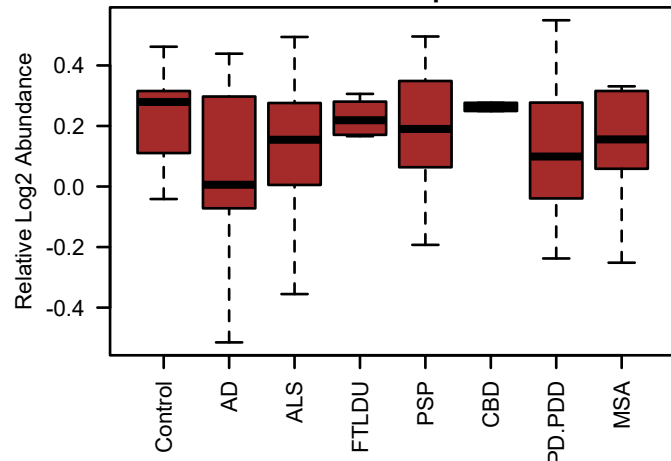

**GABRA1 UPenn Mixed PRM**  
K-W ANOVA p: 0.24

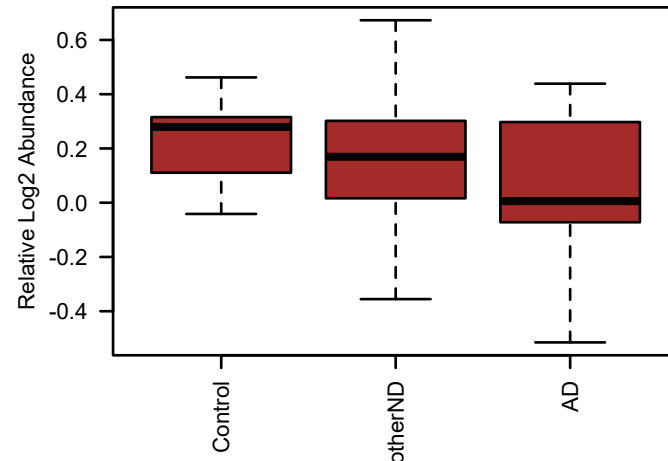

**bicor=-0.18, p=0.095**  
**cor=-0.16, p=0.15**

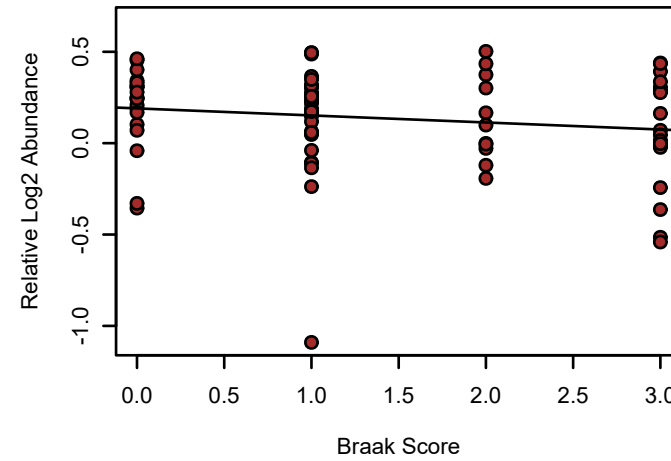

**bicor=-0.21, p=0.035**  
**cor=-0.25, p=0.012**

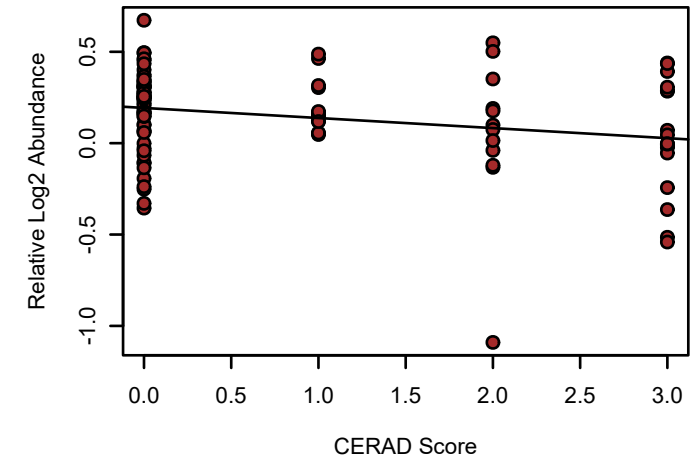

**RPL7 UPenn Mixed PRM**  
M7 black MEGA module member  
K-W ANOVA p: 0.24

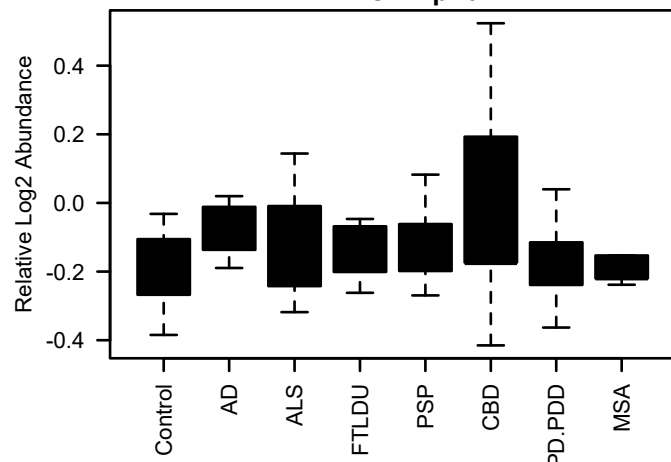

**RPL7 UPenn Mixed PRM**  
K-W ANOVA p: 0.046

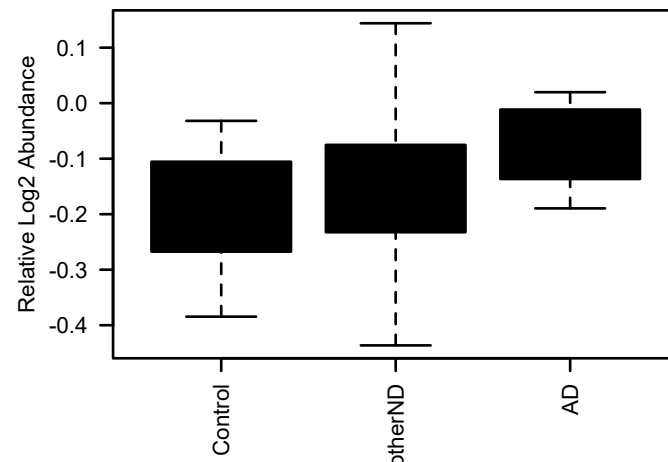

**bicor=0.22, p=0.048**  
**cor=0.3, p=0.0056**

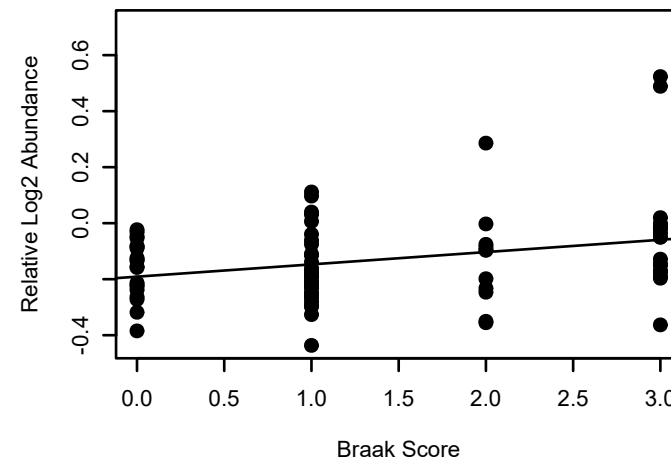

**bicor=0.22, p=0.025**  
**cor=0.19, p=0.058**

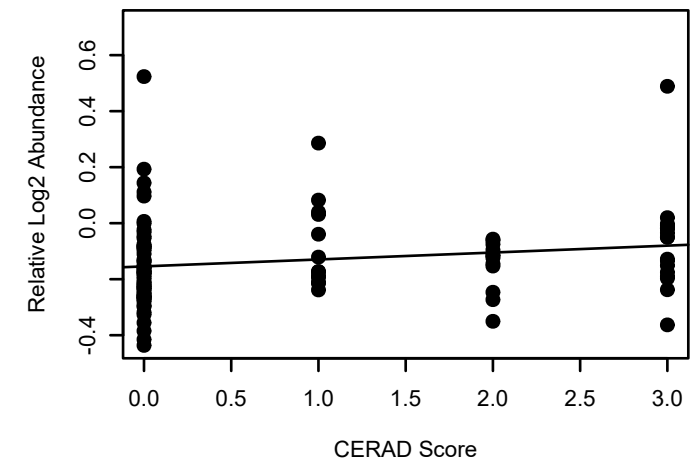



**DLGAP1 UPenn Mixed PRM**  
M1 turquoise MEGA module member  
K-W ANOVA p: 0.00061

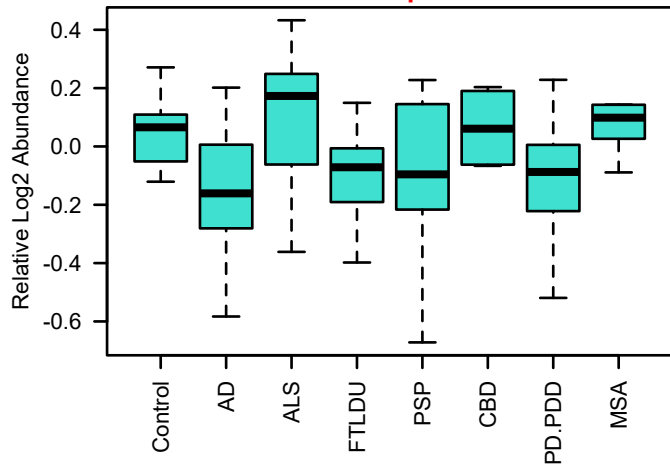

**DLGAP1 UPenn Mixed PRM**  
K-W ANOVA p: 0.0037

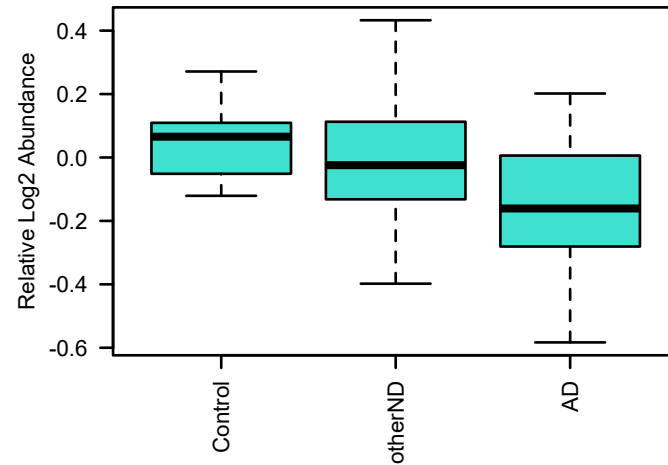

**bicor=-0.25, p=0.024**  
**cor=-0.29, p=0.0075**

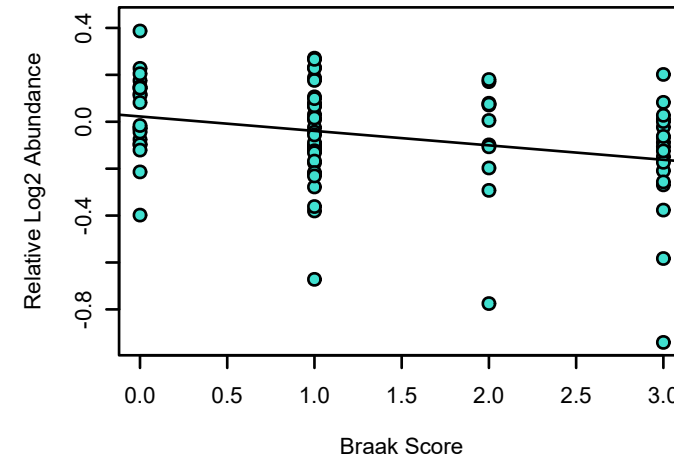

**bicor=-0.25, p=0.011**  
**cor=-0.3, p=0.0024**

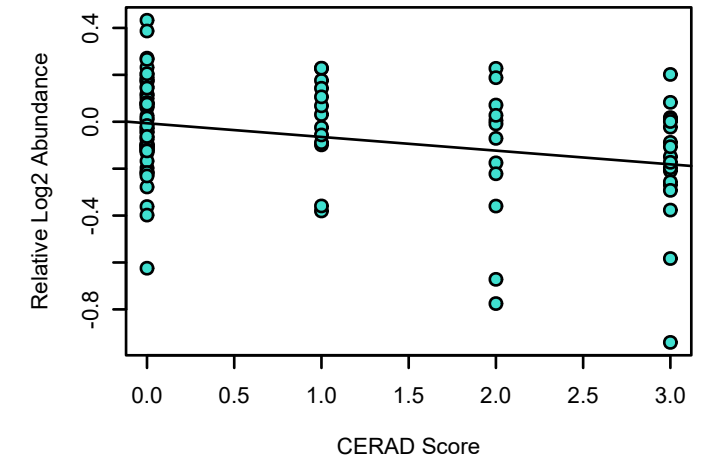

**SEPT6 UPenn Mixed PRM**  
M1 turquoise MEGA module member  
K-W ANOVA p: 0.26

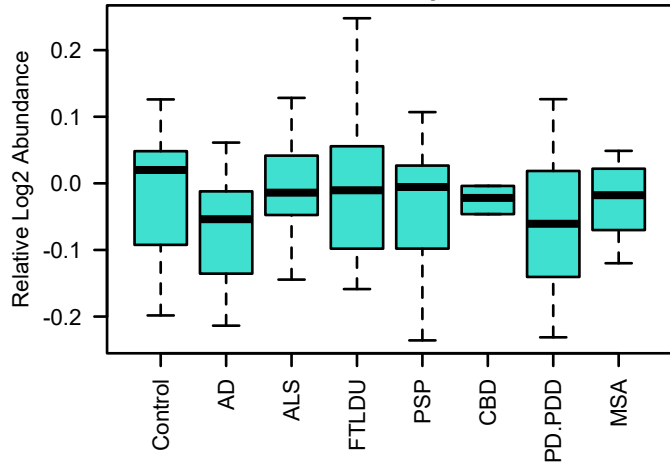

**SEPT6 UPenn Mixed PRM**  
K-W ANOVA p: 0.074

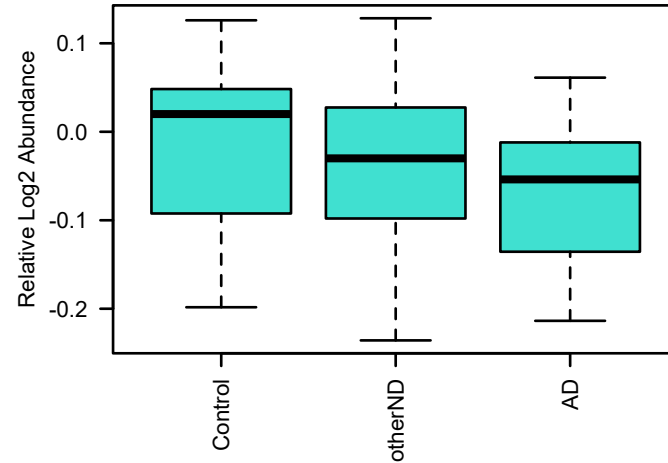

**bicor=-0.24, p=0.026**  
**cor=-0.27, p=0.013**

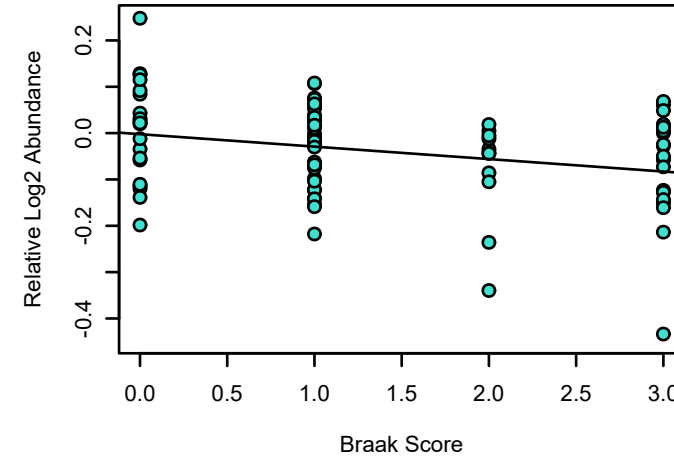

**bicor=-0.19, p=0.064**  
**cor=-0.23, p=0.021**

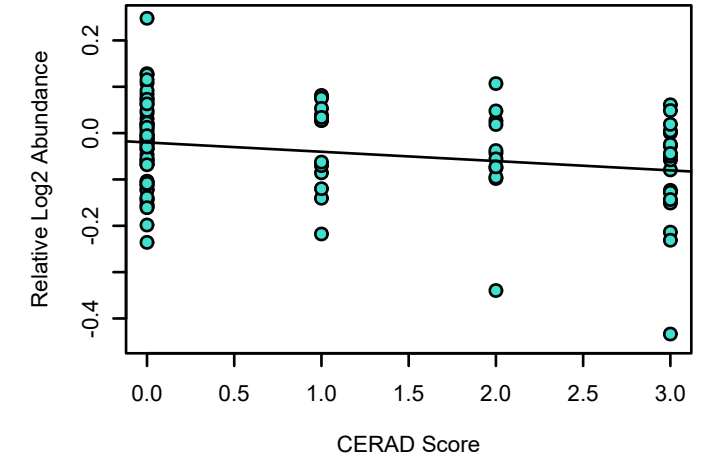

**CS UPenn Mixed PRM**  
NA grey MEGA module member  
K-W ANOVA p: 0.49

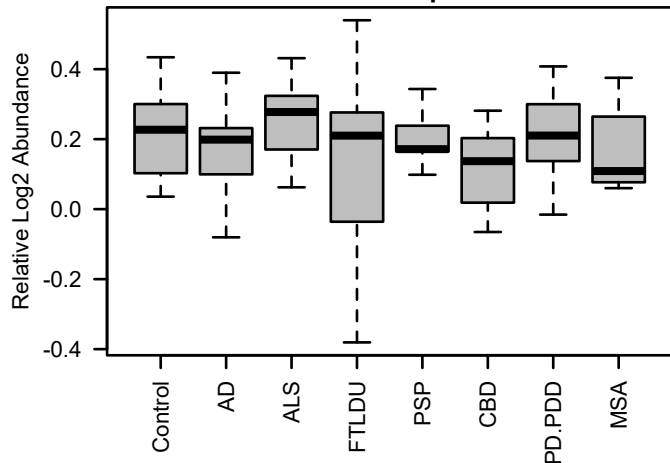

**CS UPenn Mixed PRM**  
K-W ANOVA p: 0.76

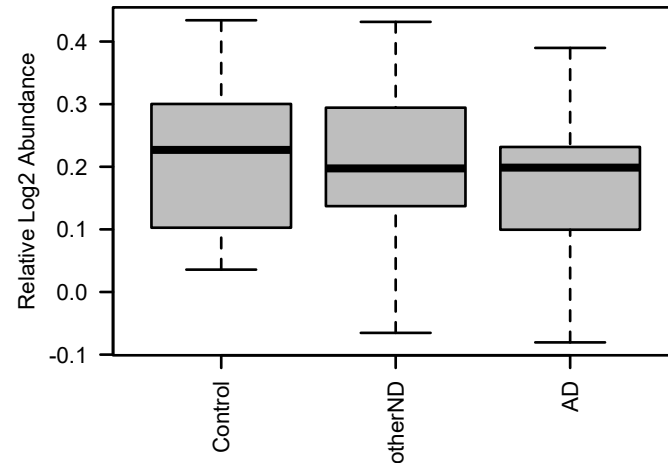

**bicor=-0.19, p=0.086**  
**cor=-0.2, p=0.068**

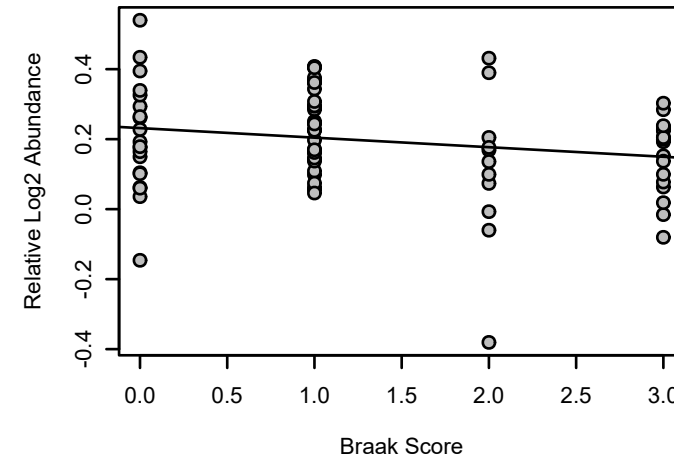

**bicor=-0.093, p=0.36**  
**cor=-0.084, p=0.41**

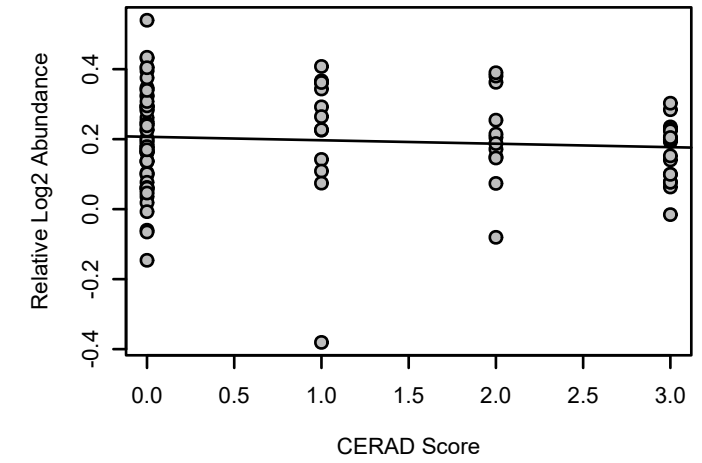

**PSD3 UPenn Mixed PRM**  
M1 turquoise MEGA module member  
K-W ANOVA p: 0.014

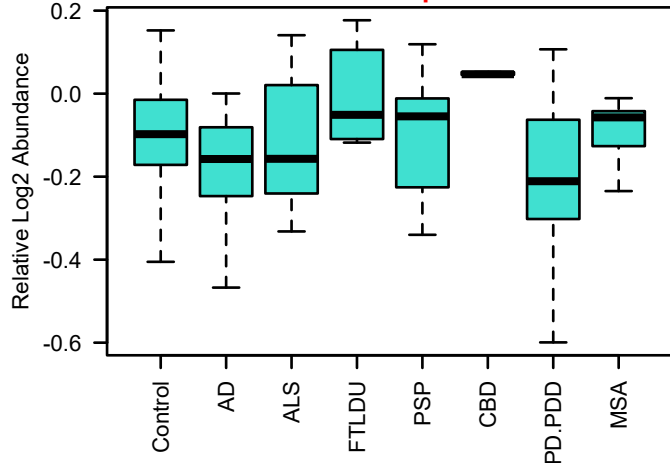

**PSD3 UPenn Mixed PRM**  
K-W ANOVA p: 0.088

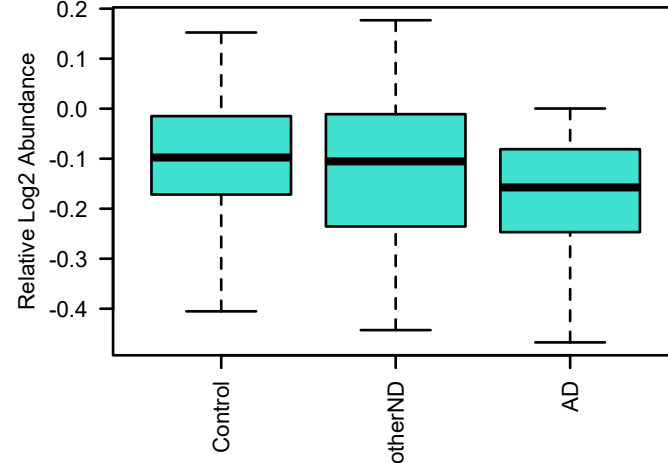

**bicor=-0.14, p=0.21**  
**cor=-0.14, p=0.2**

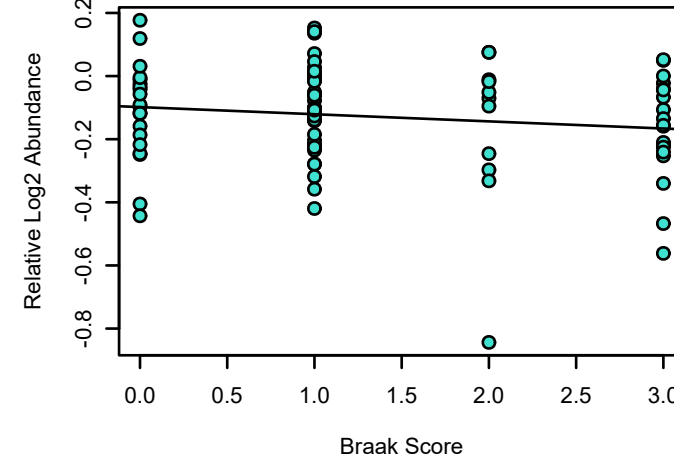

**bicor=-0.13, p=0.2**  
**cor=-0.16, p=0.11**

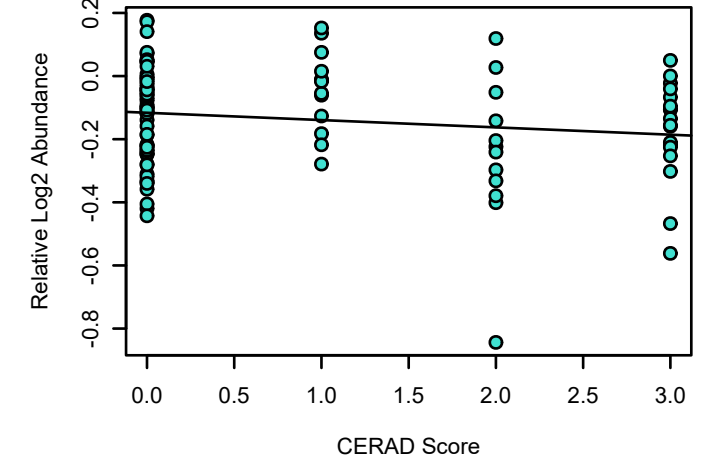

**DGKB UPenn Mixed PRM**  
M1 turquoise MEGA module member  
K-W ANOVA p: 0.0025

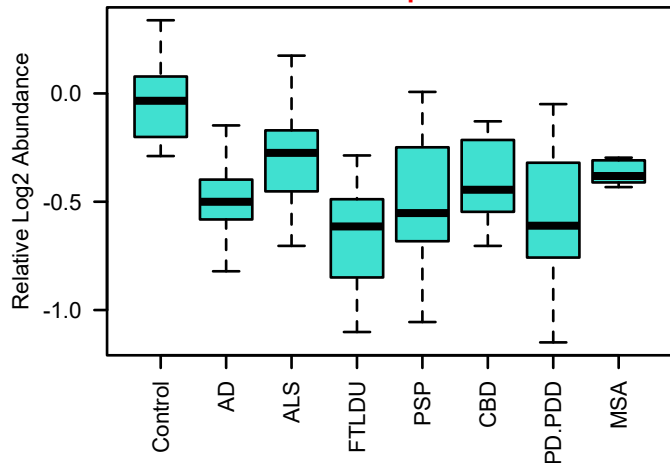

**DGKB UPenn Mixed PRM**  
K-W ANOVA p: 8.3e-05

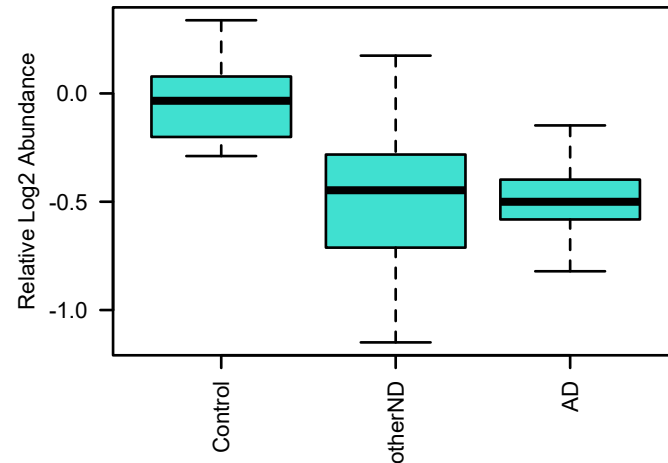

**bicor=-0.23, p=0.039**  
**cor=-0.25, p=0.022**

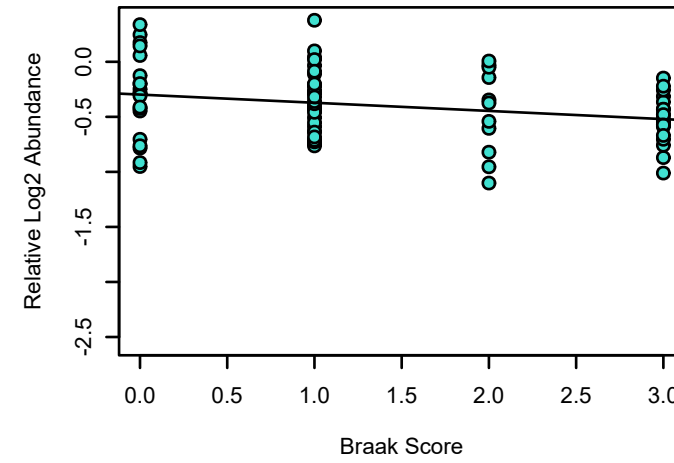

**bicor=-0.17, p=0.089**  
**cor=-0.18, p=0.073**

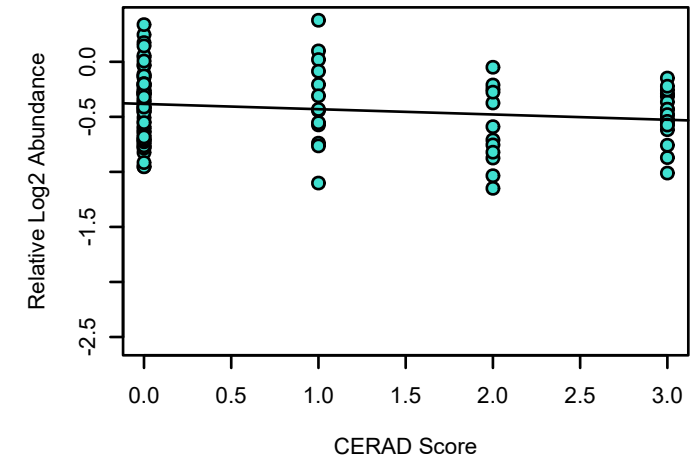

**SYNGR1 UPenn Mixed PRM**  
M1 turquoise MEGA module member  
K-W ANOVA p: 0.0048

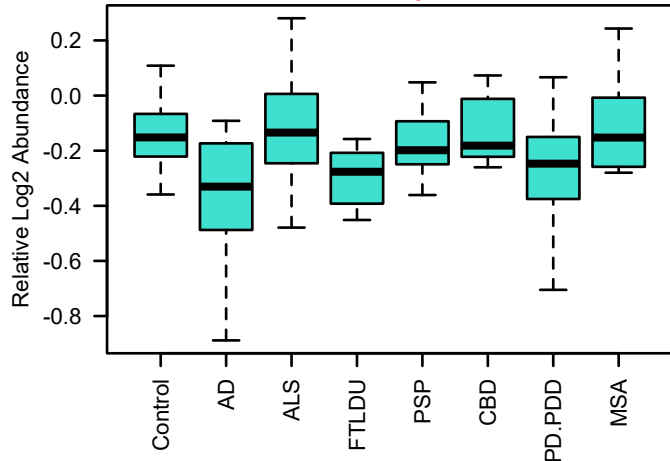

**SYNGR1 UPenn Mixed PRM**  
K-W ANOVA p: 0.0073

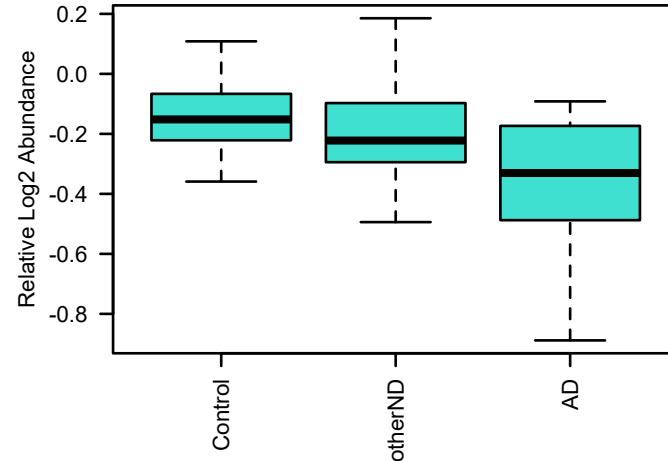

**bicor=-0.29, p=0.0078**  
**cor=-0.29, p=0.0075**

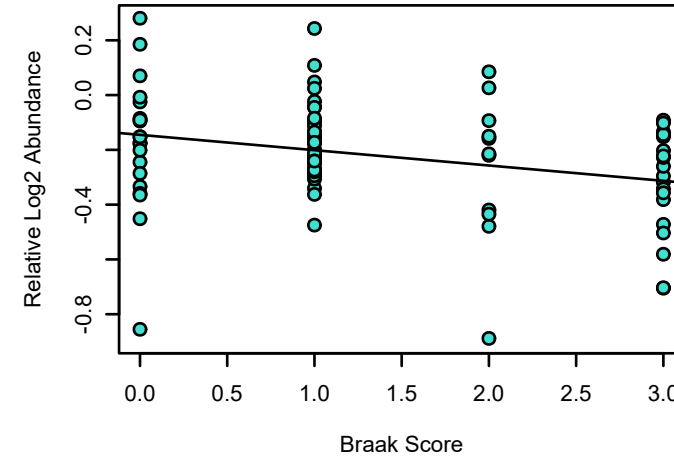

**bicor=-0.25, p=0.011**  
**cor=-0.25, p=0.012**

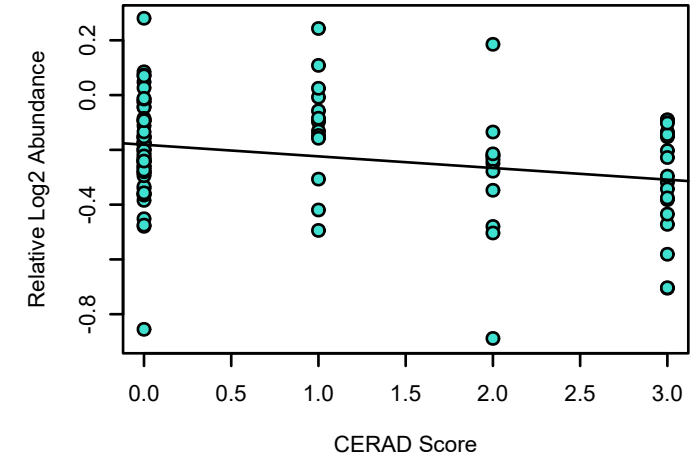

**GPM6B UPenn Mixed PRM**  
M1 turquoise MEGA module member  
K-W ANOVA p: 0.13

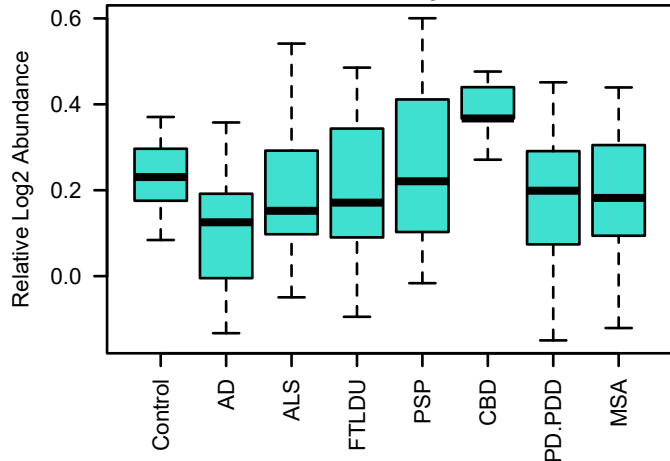

**GPM6B UPenn Mixed PRM**  
K-W ANOVA p: 0.094

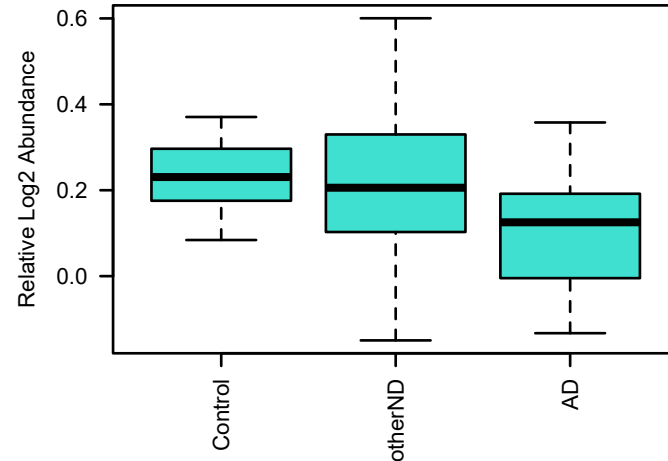

**bicor=-0.1, p=0.35**  
**cor=-0.11, p=0.32**

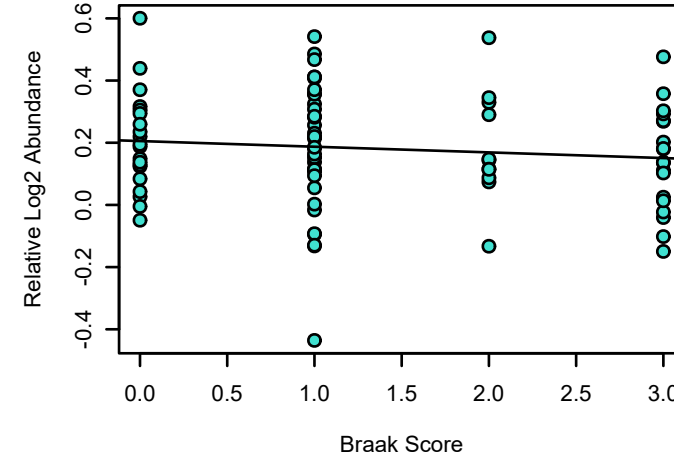

**bicor=-0.21, p=0.033**  
**cor=-0.22, p=0.028**

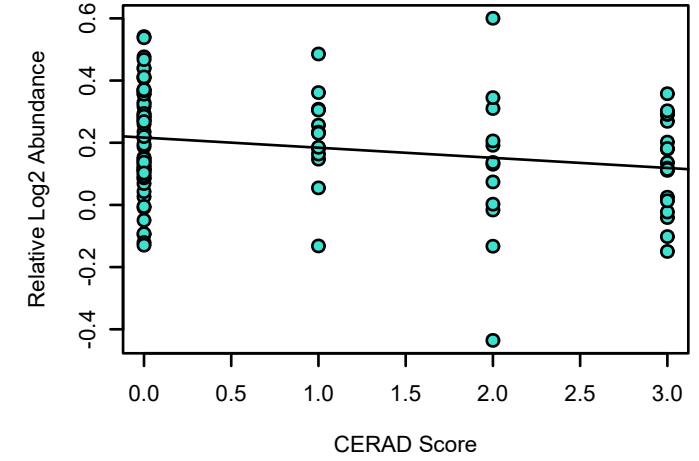

**STXBP5L UPenn Mixed PRM**  
M3 brown MEGA module member  
K-W ANOVA p: 0.024

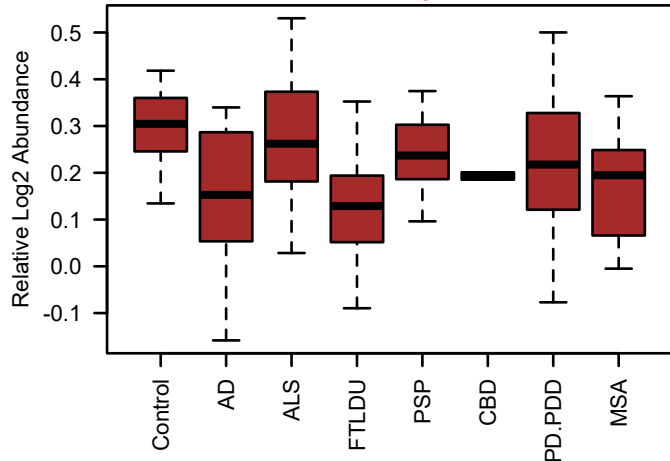

**STXBP5L UPenn Mixed PRM**  
K-W ANOVA p: 0.008

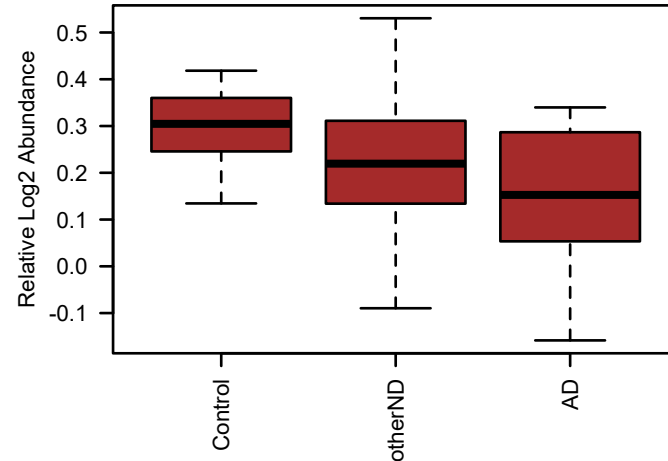

**bicor=-0.26, p=0.019**  
**cor=-0.28, p=0.0099**

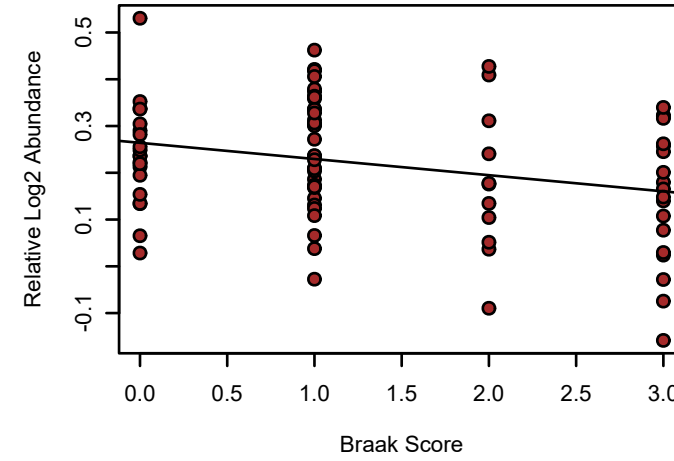

**bicor=-0.27, p=0.0071**  
**cor=-0.29, p=0.0034**

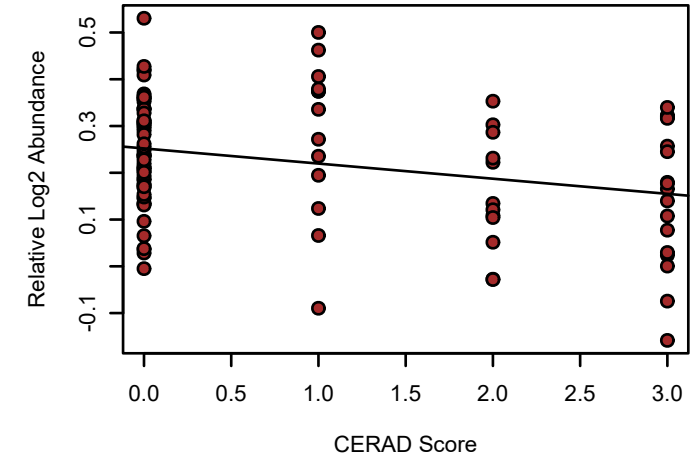

**MOG UPenn Mixed PRM**  
**M2 blue MEGA module member**  
**K-W ANOVA p: 0.052**

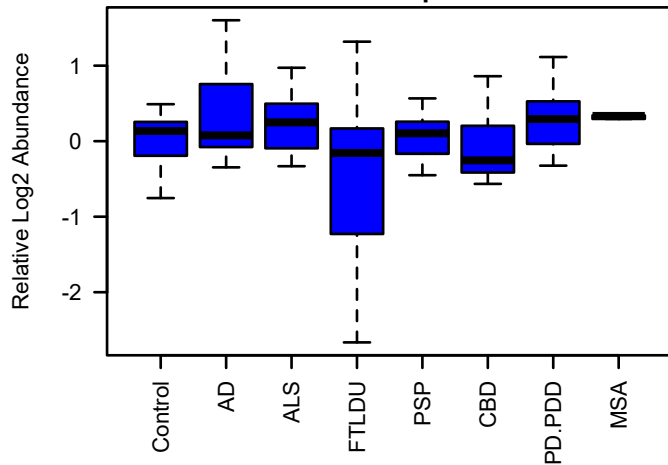

**MOG UPenn Mixed PRM**  
**K-W ANOVA p: 0.32**

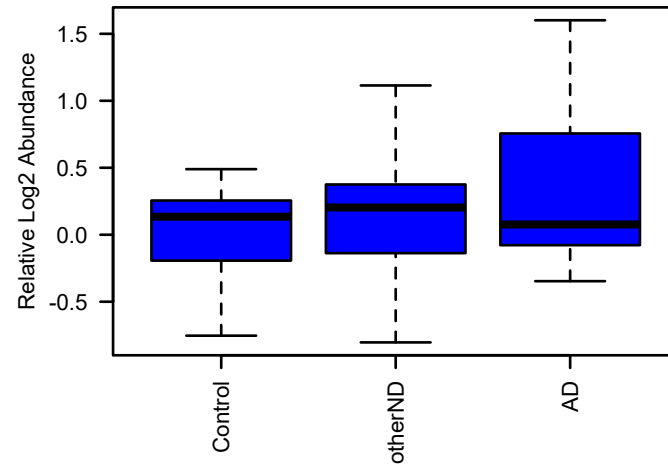

**bicor=0.077, p=0.49**  
**cor=0.11, p=0.32**

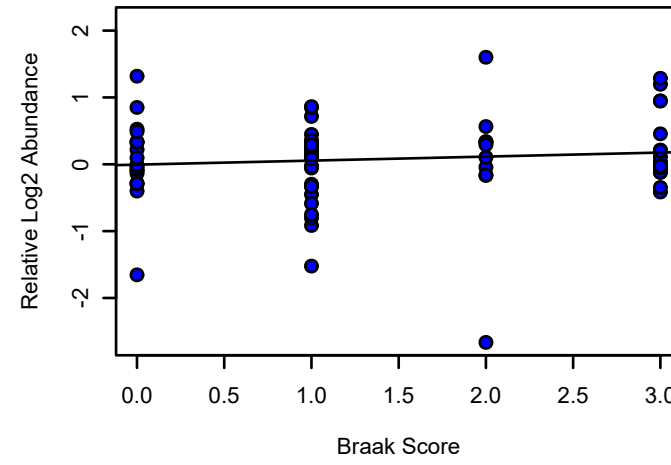

**bicor=0.072, p=0.48**  
**cor=0.1, p=0.32**

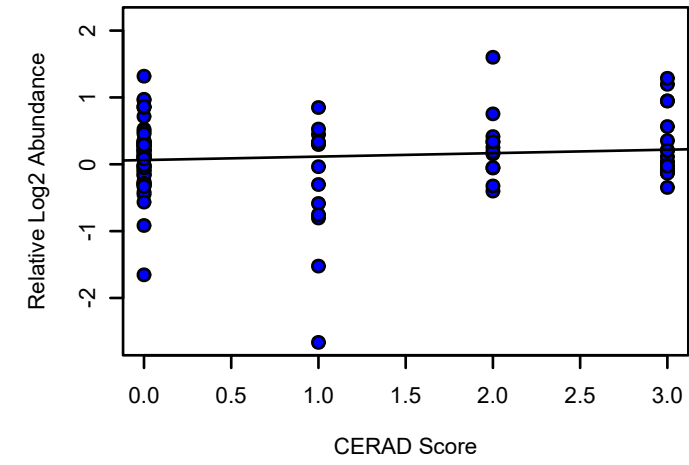

**PCDH1 UPenn Mixed PRM**  
**M1 turquoise MEGA module member**  
**K-W ANOVA p: 0.00041**

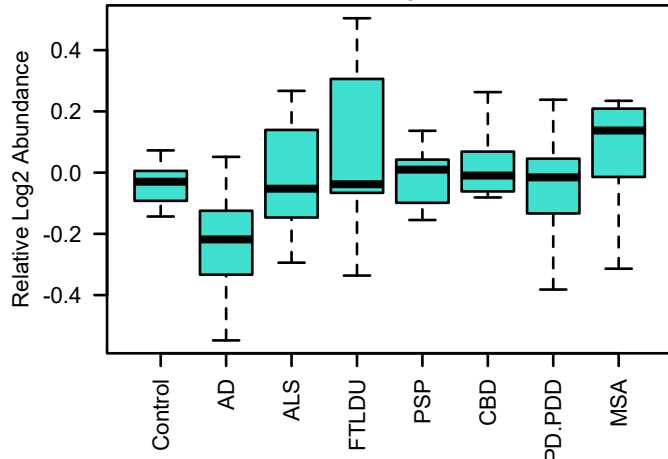

**PCDH1 UPenn Mixed PRM**  
**K-W ANOVA p: 9.4e-06**

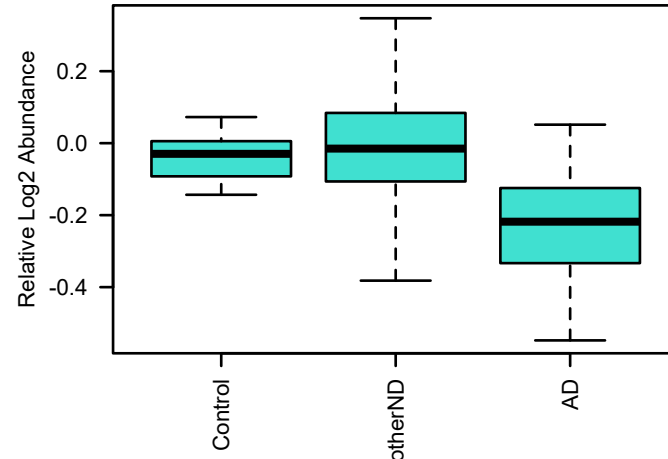

**bicor=-0.25, p=0.021**  
**cor=-0.29, p=0.0075**

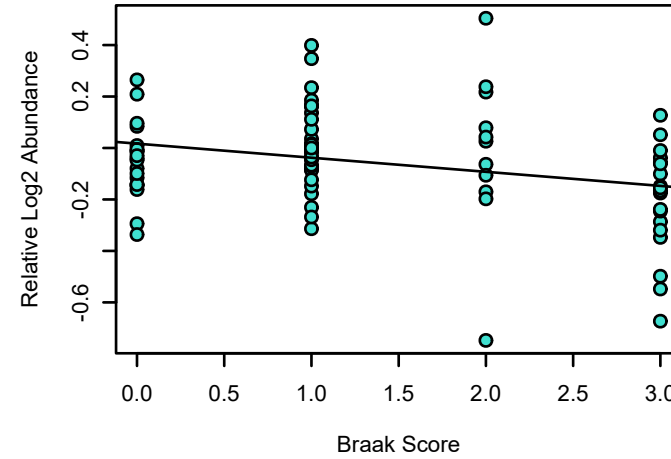

**bicor=-0.33, p=0.00093**  
**cor=-0.36, p=0.00023**

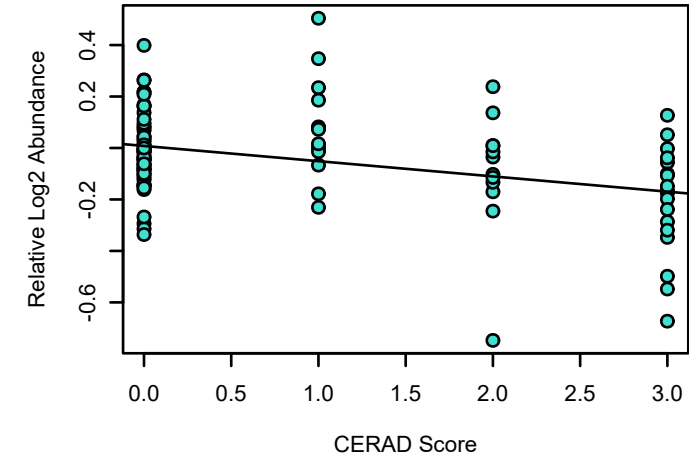

**SEPT11 UPenn Mixed PRM**  
**M1 turquoise MEGA module member**  
**K-W ANOVA p: 0.06**

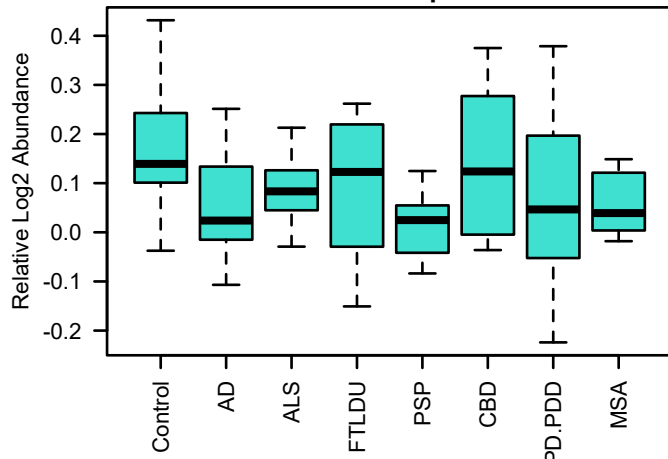

**SEPT11 UPenn Mixed PRM**  
**K-W ANOVA p: 0.027**

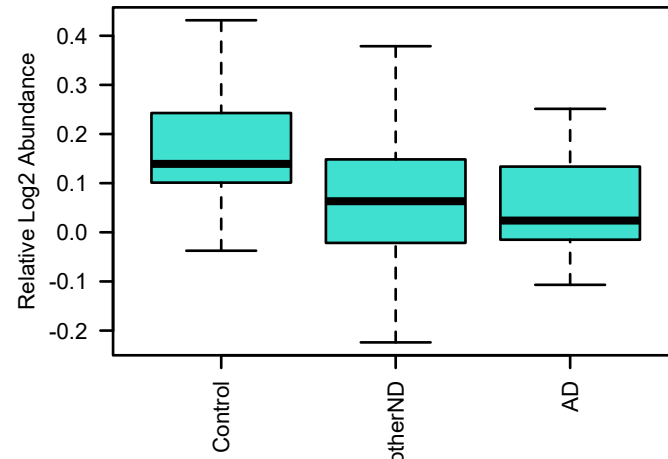

**bicor=-0.14, p=0.19**  
**cor=-0.12, p=0.28**

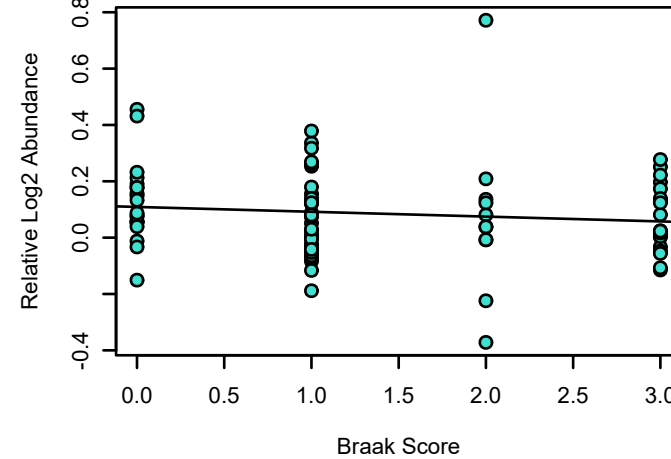

**bicor=-0.11, p=0.3**  
**cor=-0.11, p=0.28**

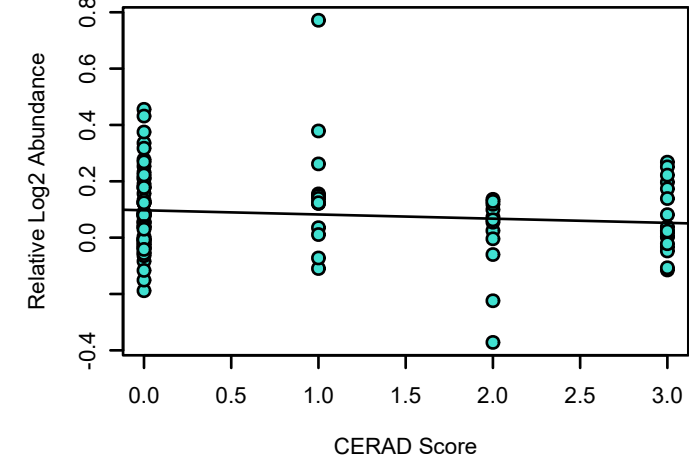

**DNM3 UPenn Mixed PRM**  
**M3 brown MEGA module member**  
**K-W ANOVA p: 0.015**

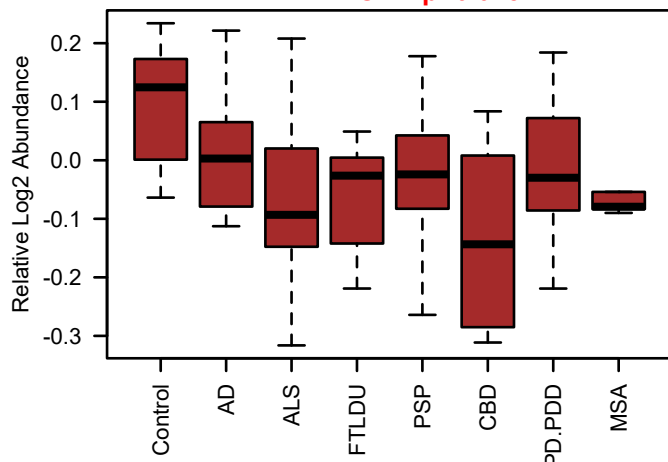

**DNM3 UPenn Mixed PRM**  
**K-W ANOVA p: 0.00075**

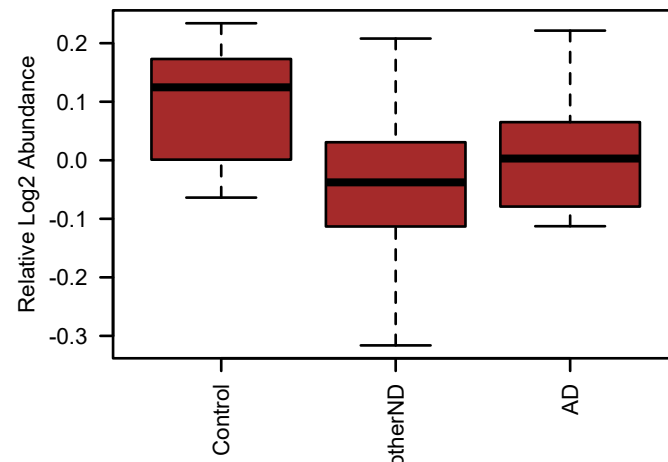

**bicor=-0.13, p=0.26**  
**cor=-0.13, p=0.24**

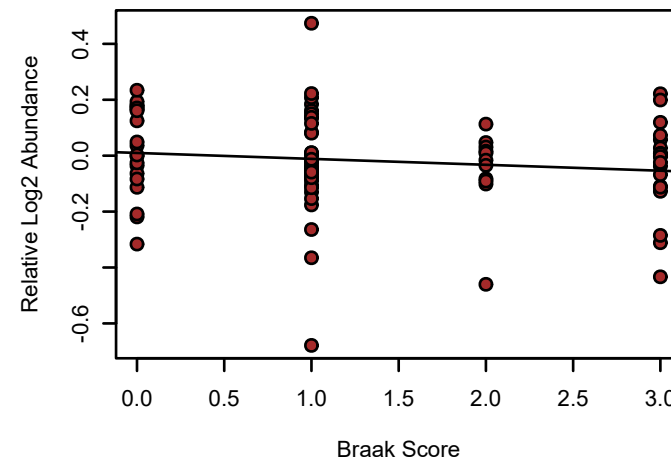

**bicor=-0.058, p=0.57**  
**cor=-0.1, p=0.32**

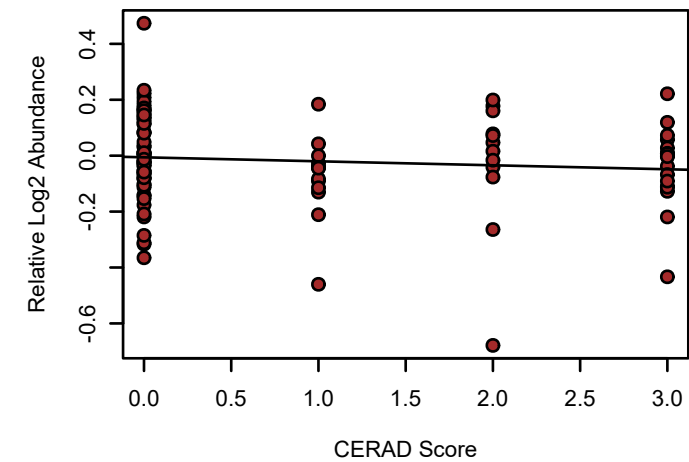

**ERLIN2 UPenn Mixed PRM**  
M4 yellow MEGA module member  
K-W ANOVA p: 6.3e-05

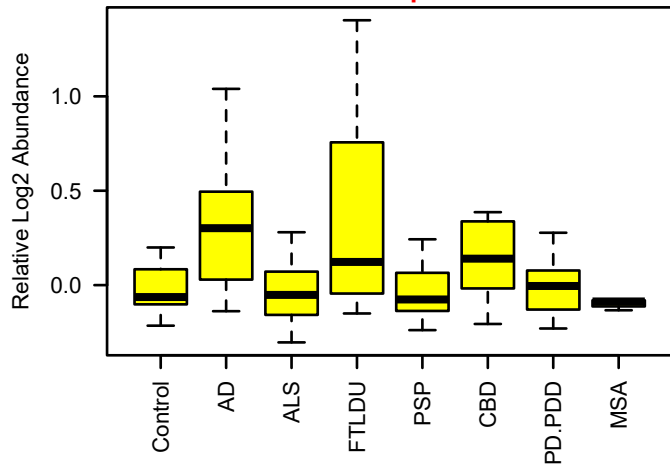

**ERLIN2 UPenn Mixed PRM**  
K-W ANOVA p: 0.00073

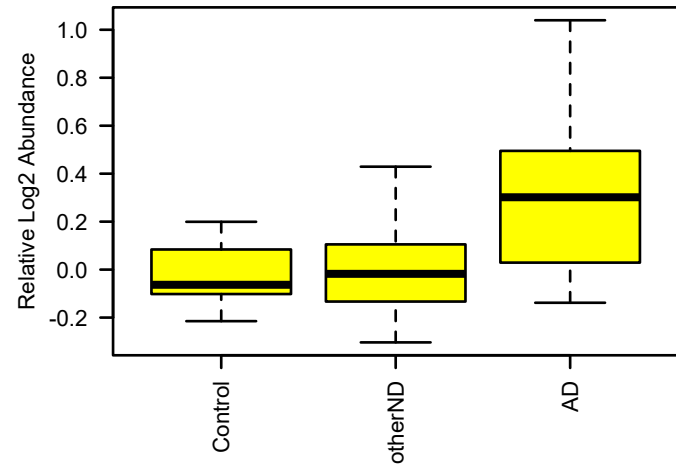

**bicor=0.32, p=0.0027**  
**cor=0.3, p=0.0056**

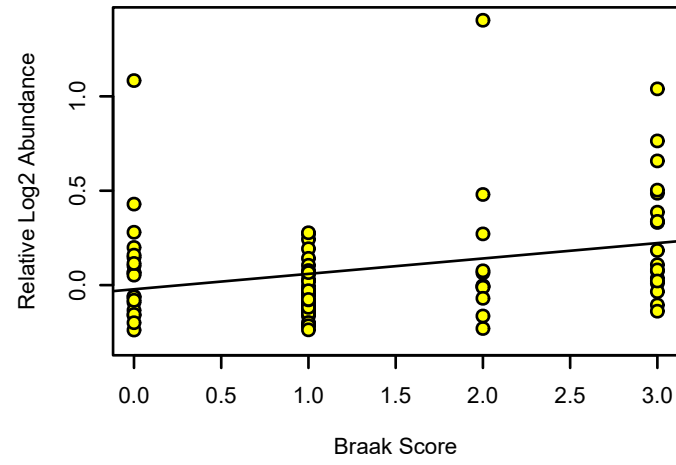

**bicor=0.17, p=0.083**  
**cor=0.22, p=0.028**

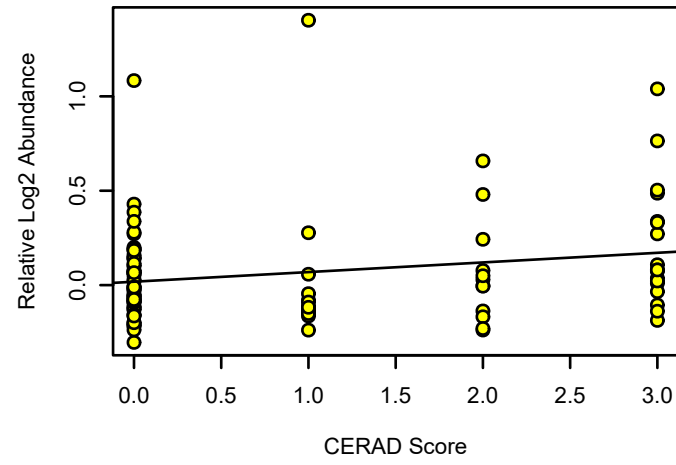

**SNCA UPenn Mixed PRM**  
M6 red MEGA module member  
K-W ANOVA p: 3.6e-05

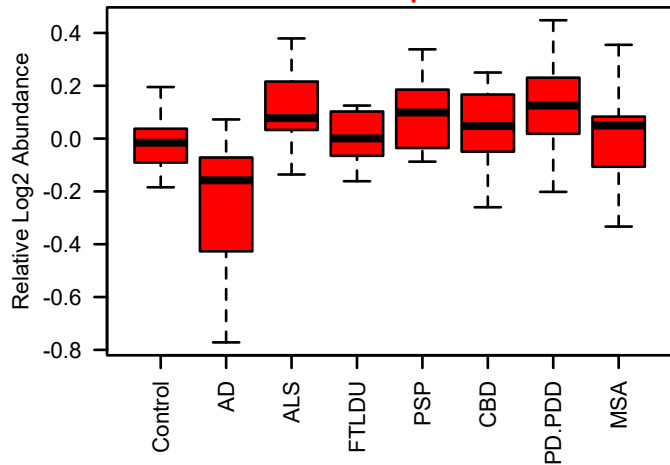

**SNCA UPenn Mixed PRM**  
K-W ANOVA p: 2.3e-07

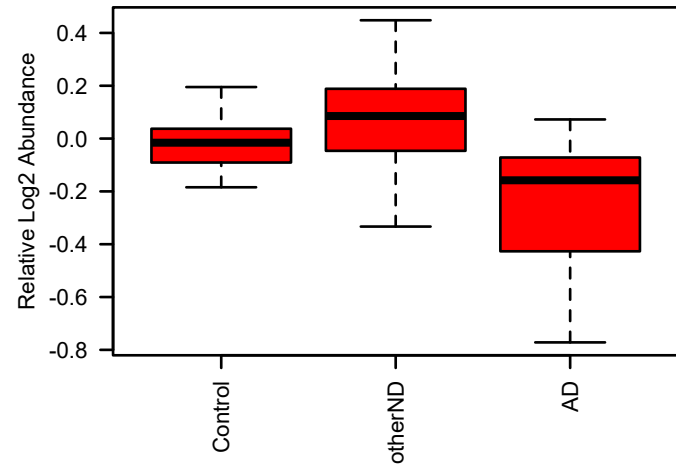

**bicor=-0.19, p=0.082**  
**cor=-0.21, p=0.055**

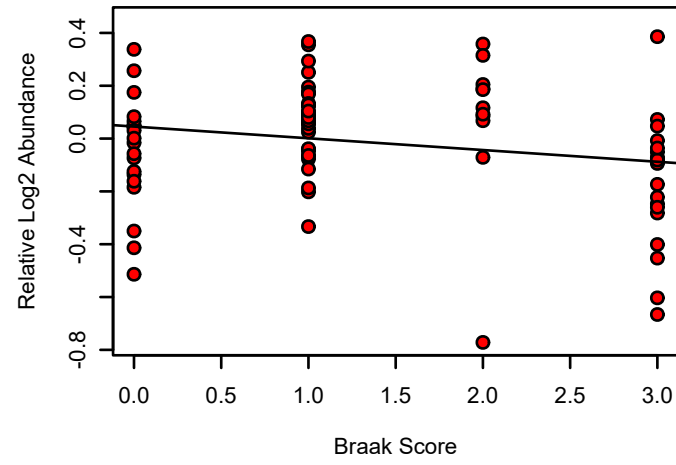

**bicor=-0.19, p=0.061**  
**cor=-0.23, p=0.021**

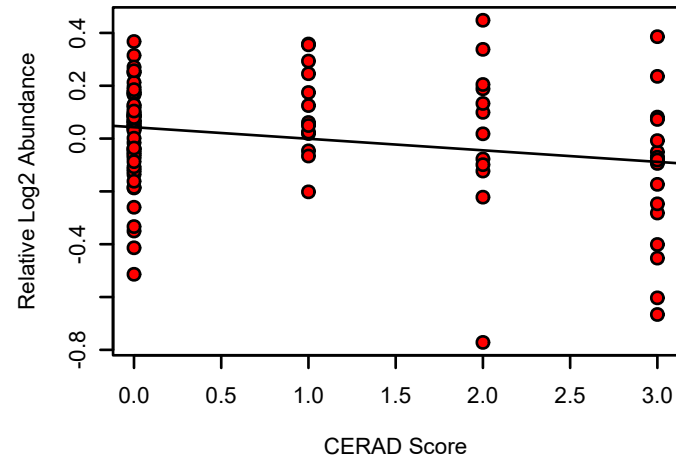

**EZR UPenn Mixed PRM**  
M4 yellow MEGA module member  
K-W ANOVA p: 0.0016

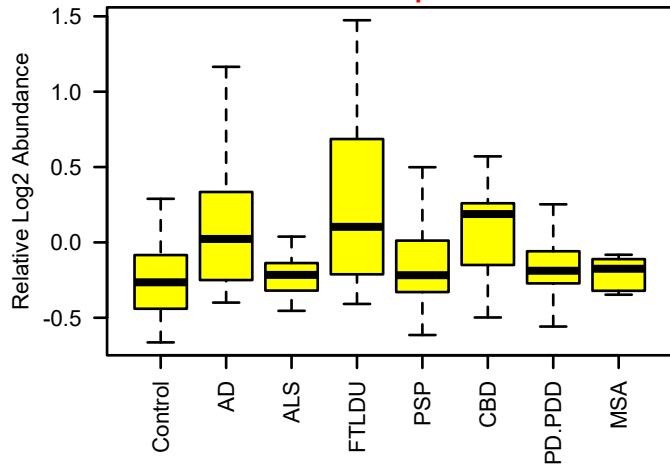

**EZR UPenn Mixed PRM**  
K-W ANOVA p: 0.014

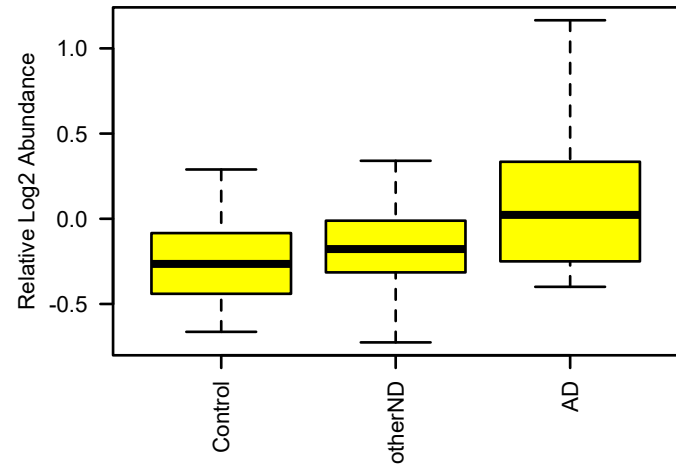

**bicor=0.32, p=0.0027**  
**cor=0.29, p=0.0075**

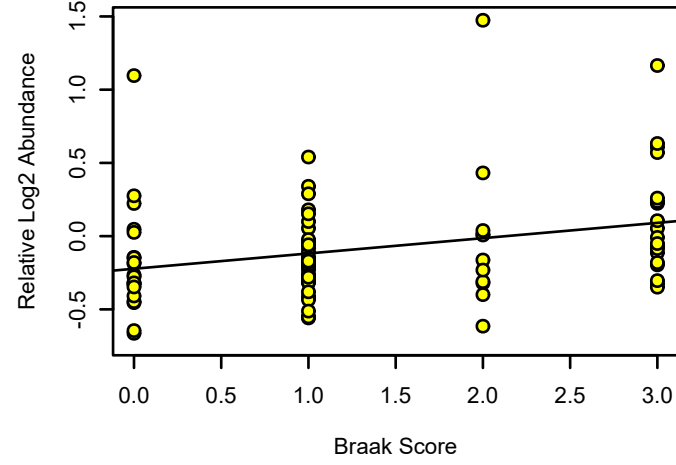

**bicor=0.23, p=0.023**  
**cor=0.23, p=0.021**

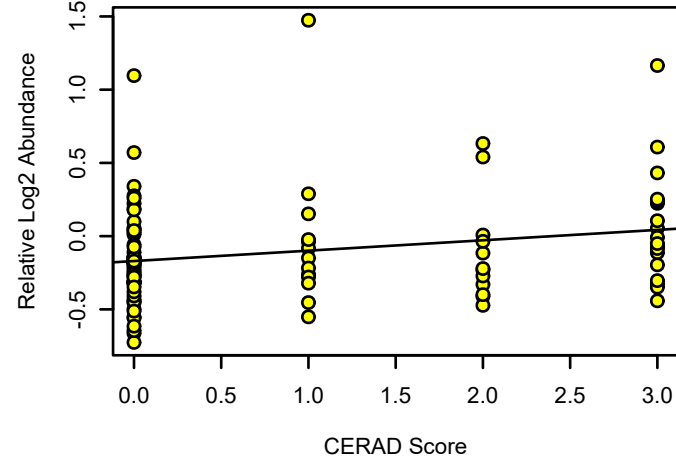

**CAMKV UPenn Mixed PRM**  
M1 turquoise MEGA module member  
K-W ANOVA p: 0.067

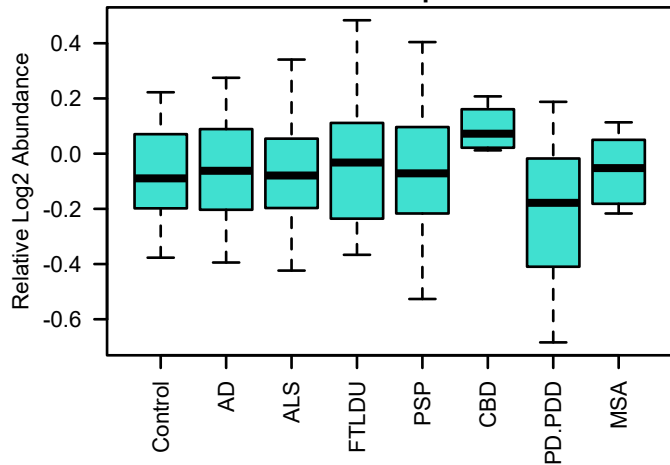

**CAMKV UPenn Mixed PRM**  
K-W ANOVA p: 0.71

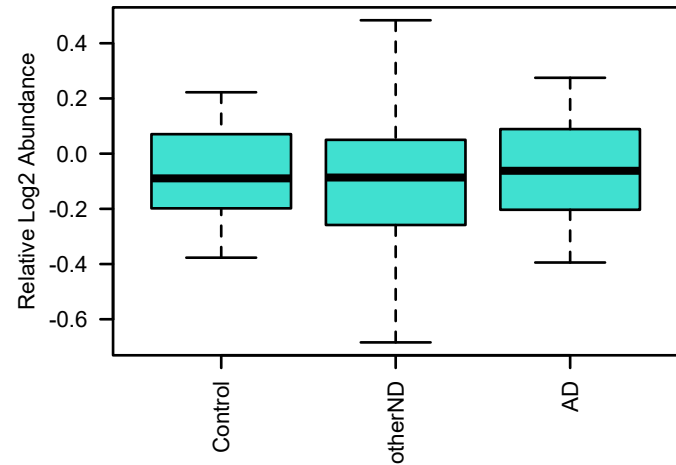

**bicor=0.11, p=0.32**  
**cor=0.12, p=0.28**

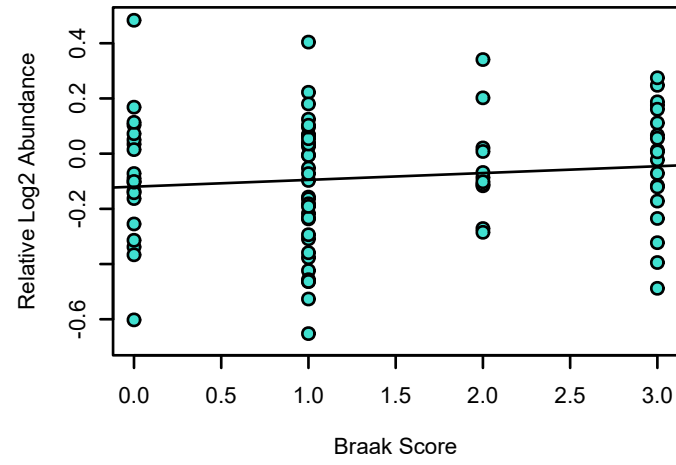

**bicor=-0.078, p=0.44**  
**cor=-0.073, p=0.47**

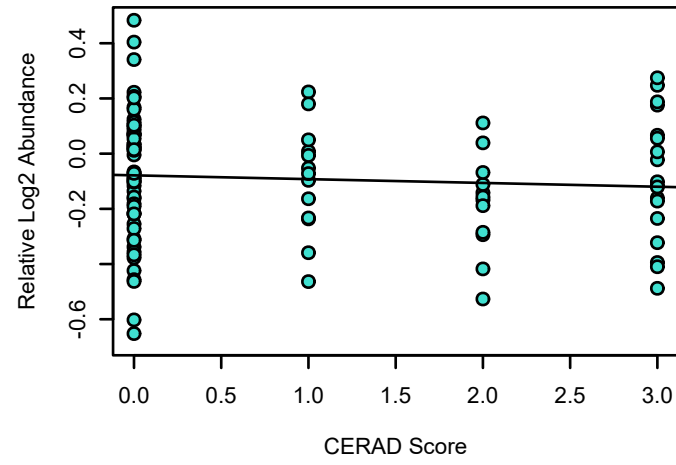



**GABRB2 UPenn Mixed PRM**  
M3 brown MEGA module member  
K-W ANOVA p: 0.063

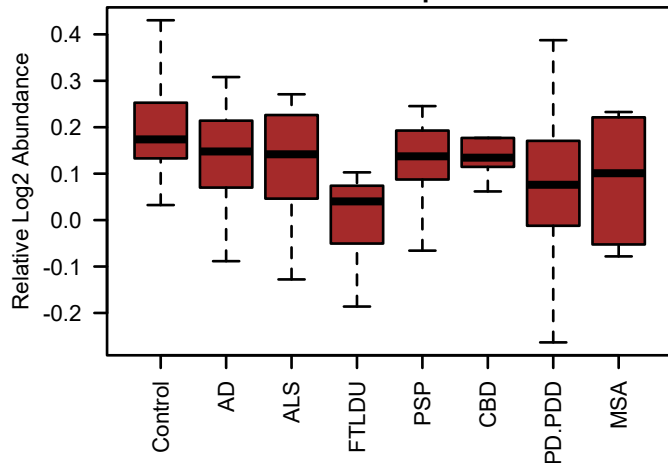

**GABRB2 UPenn Mixed PRM**  
K-W ANOVA p: 0.022

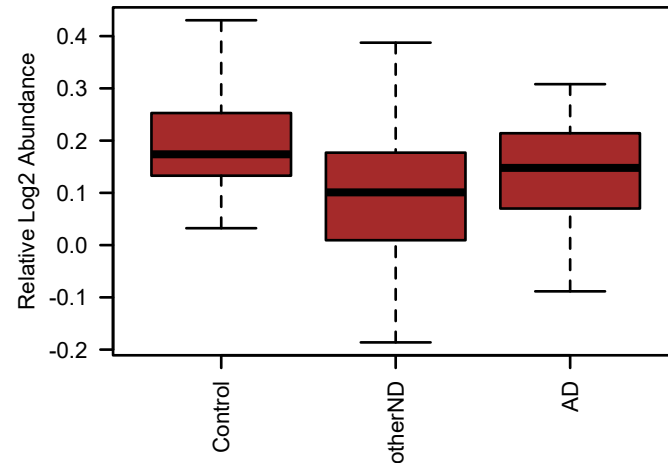

**bicor=-0.12, p=0.28**  
**cor=-0.11, p=0.32**

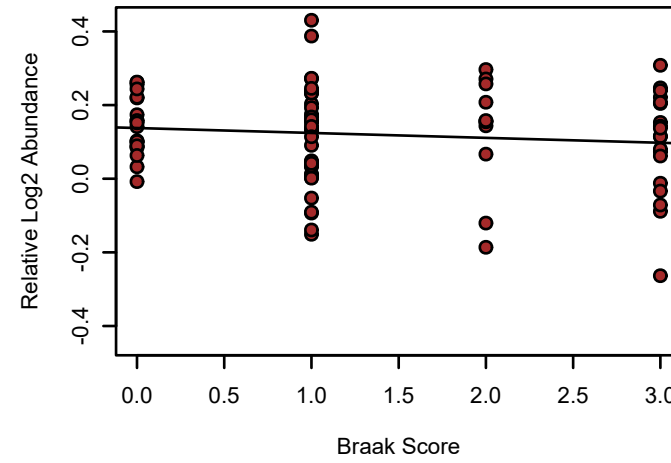

**bicor=-0.1, p=0.3**  
**cor=-0.11, p=0.28**

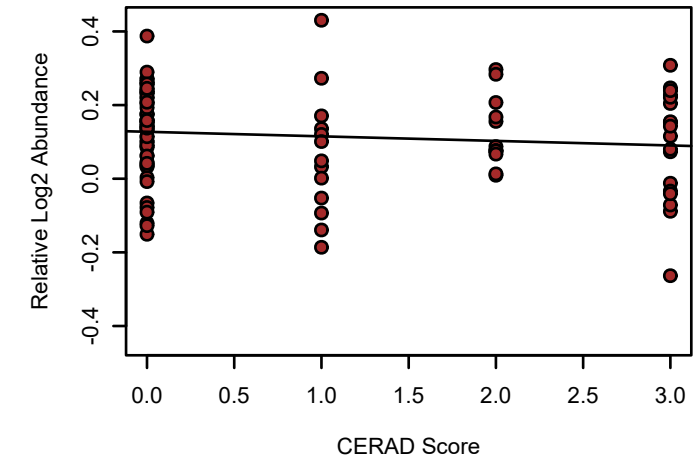

**CYFIP2 UPenn Mixed PRM**  
M1 turquoise MEGA module member  
K-W ANOVA p: 0.17

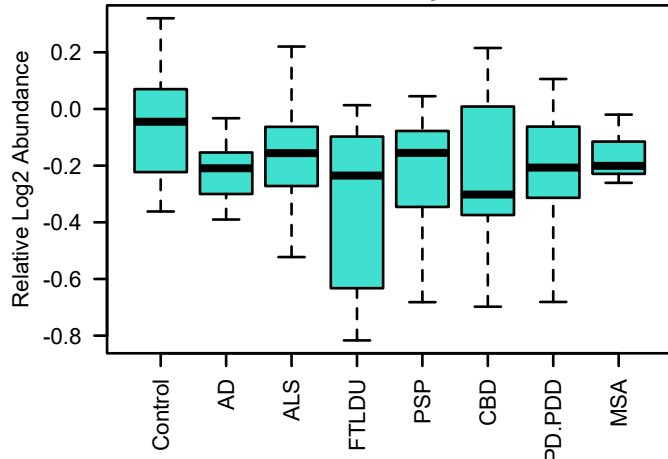

**CYFIP2 UPenn Mixed PRM**  
K-W ANOVA p: 0.049

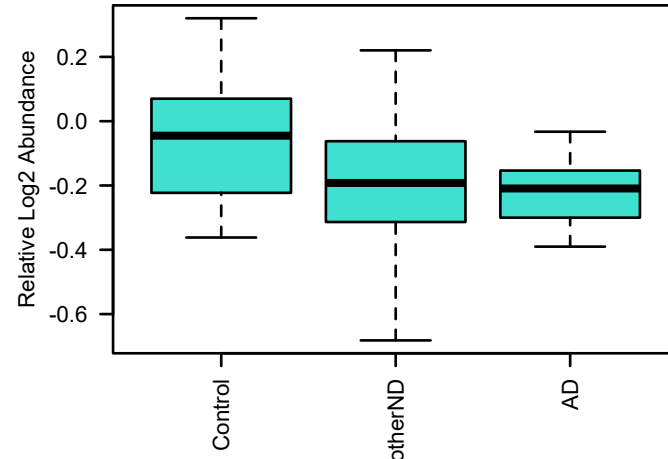

**bicor=-0.2, p=0.068**  
**cor=-0.21, p=0.055**

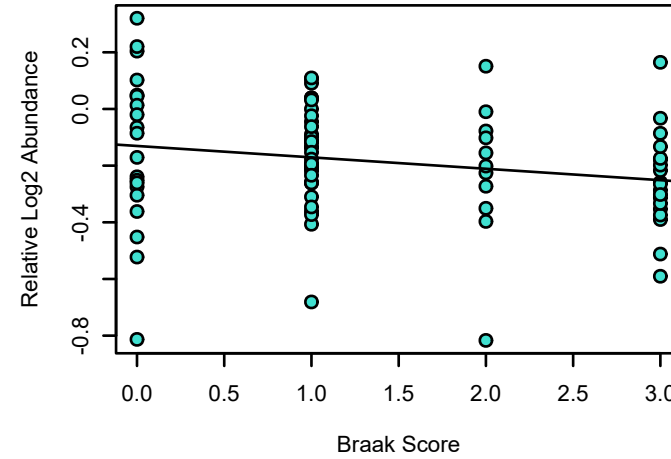

**bicor=0.0034, p=0.97**  
**cor=0.0047, p=0.96**

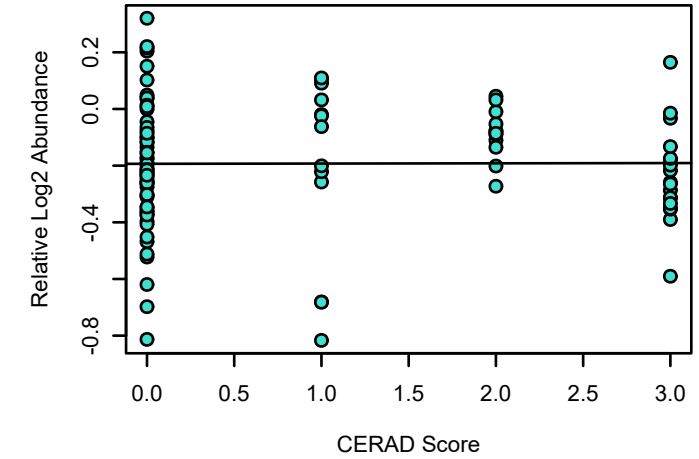

**CAMK2D UPenn Mixed PRM**  
NA grey MEGA module member  
K-W ANOVA p: 0.024

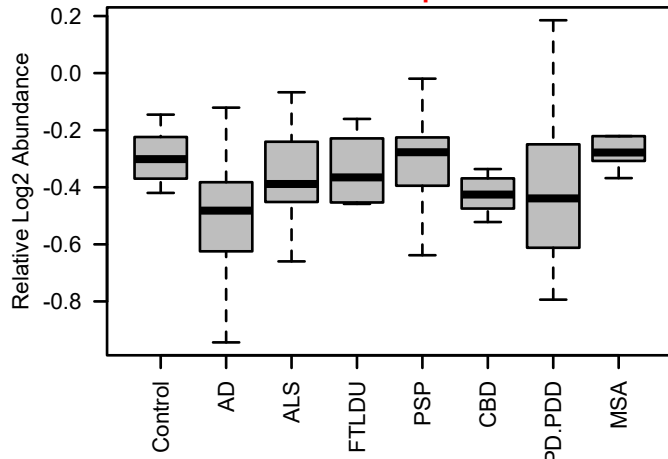

**CAMK2D UPenn Mixed PRM**  
K-W ANOVA p: 0.03

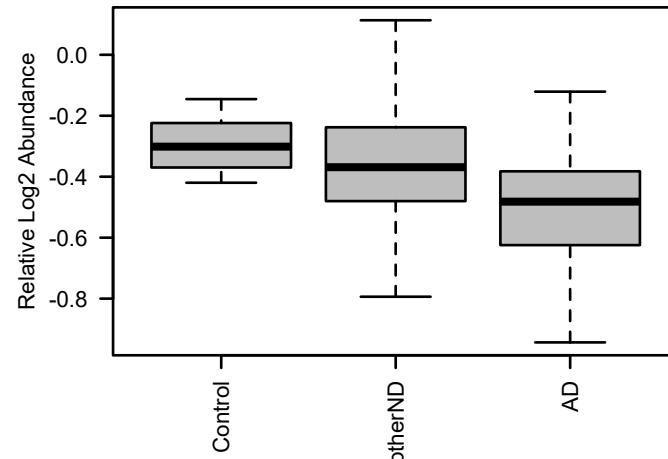

**bicor=-0.29, p=0.0078**  
**cor=-0.28, p=0.0099**

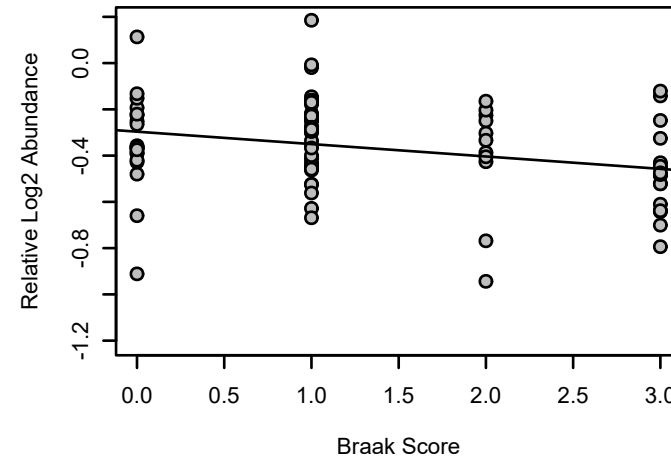

**bicor=-0.2, p=0.049**  
**cor=-0.18, p=0.073**

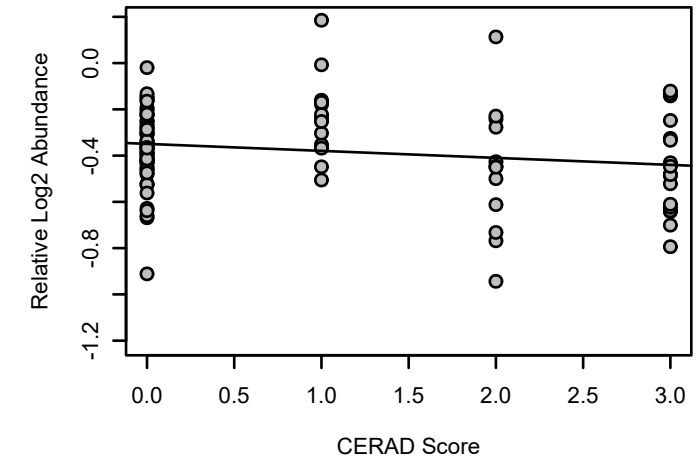

**AGK UPenn Mixed PRM**  
M1 turquoise MEGA module member  
K-W ANOVA p: 0.019

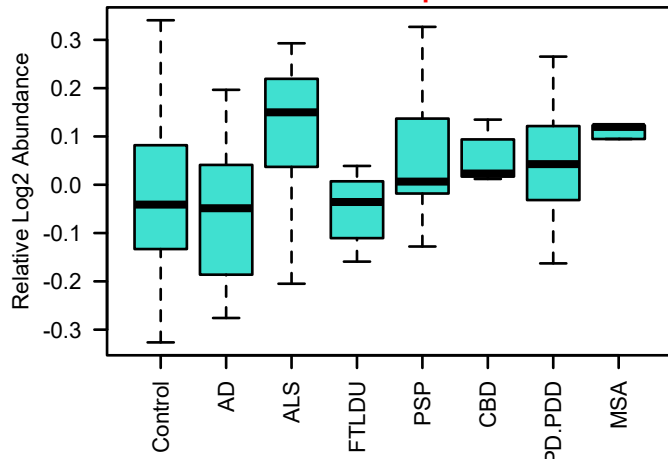

**AGK UPenn Mixed PRM**  
K-W ANOVA p: 0.004

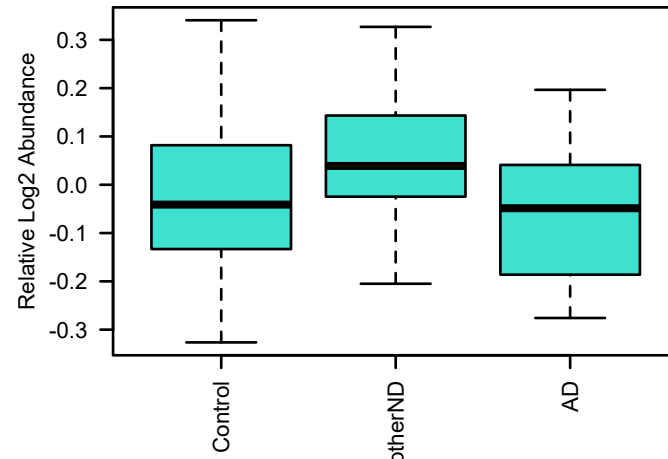

**bicor=-0.083, p=0.45**  
**cor=-0.12, p=0.28**

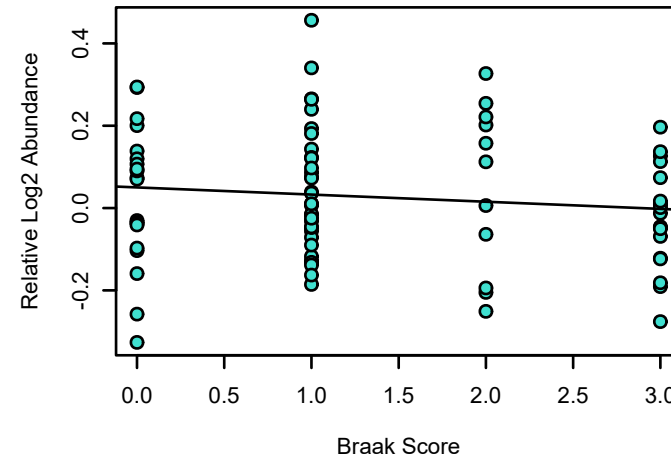

**bicor=-0.078, p=0.44**  
**cor=-0.067, p=0.51**

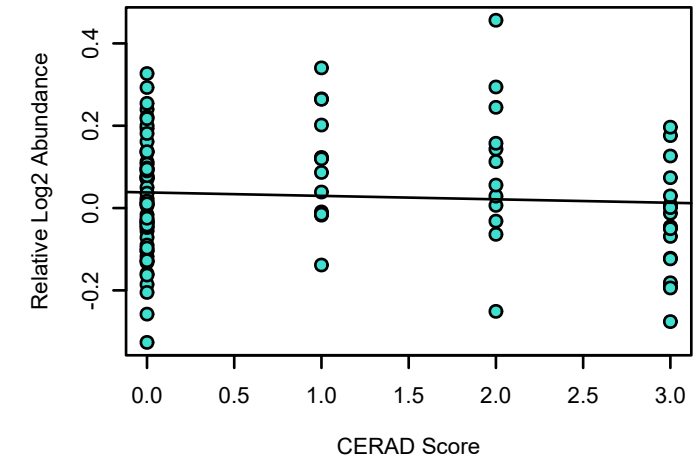

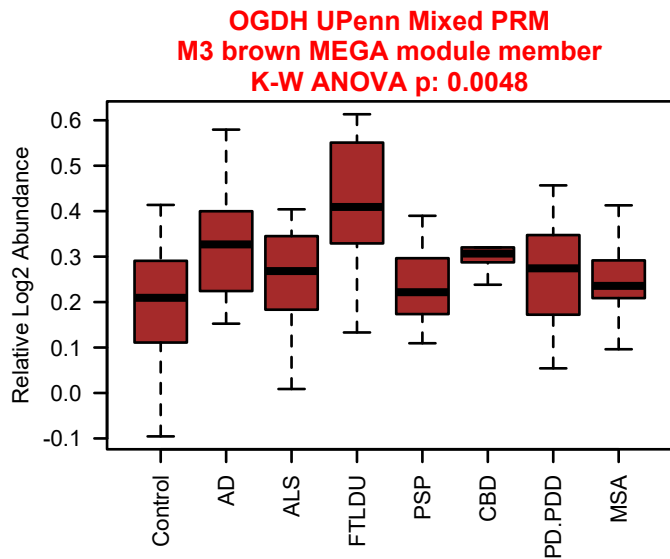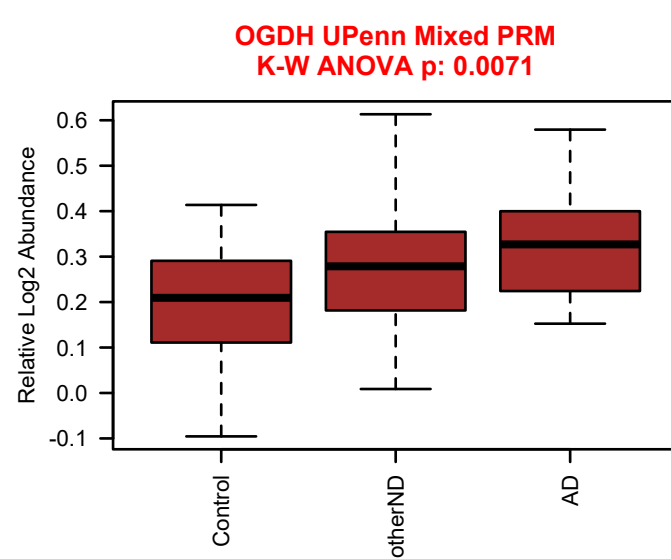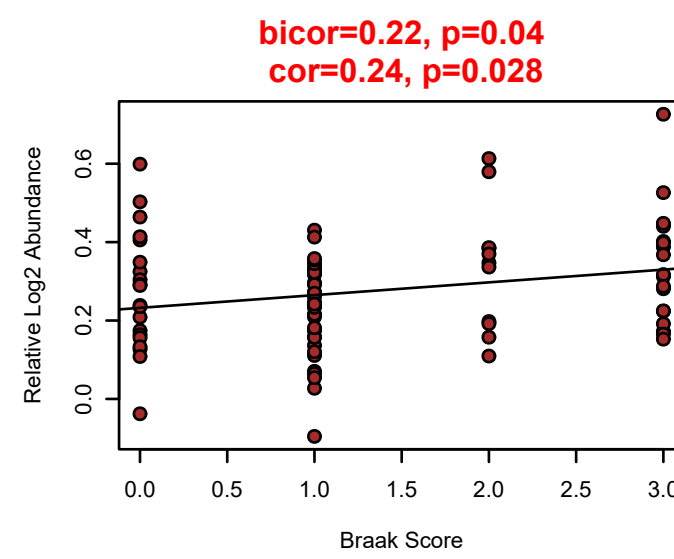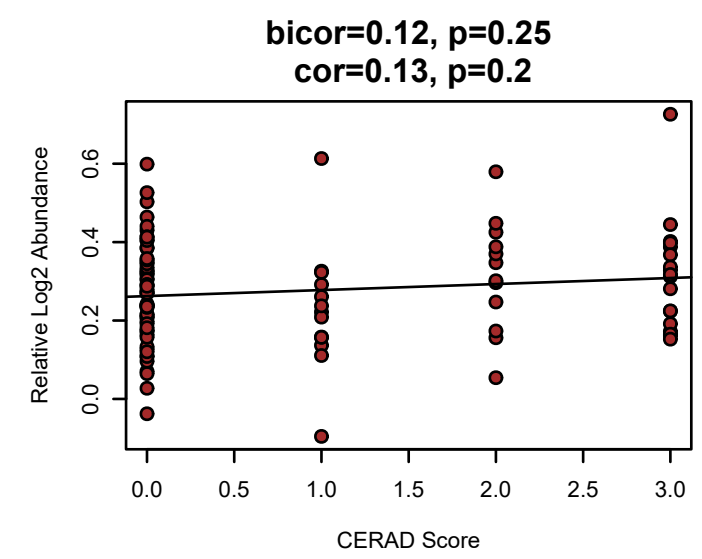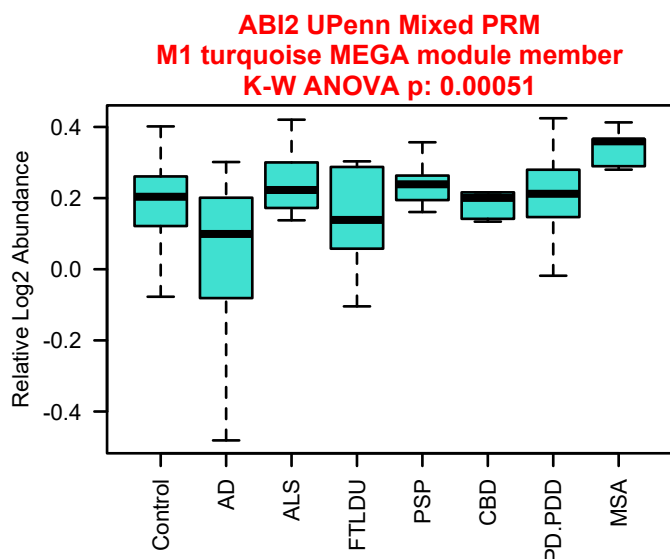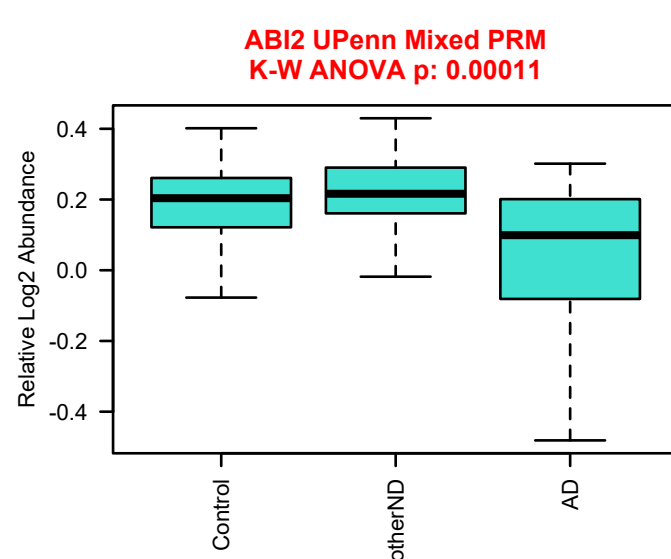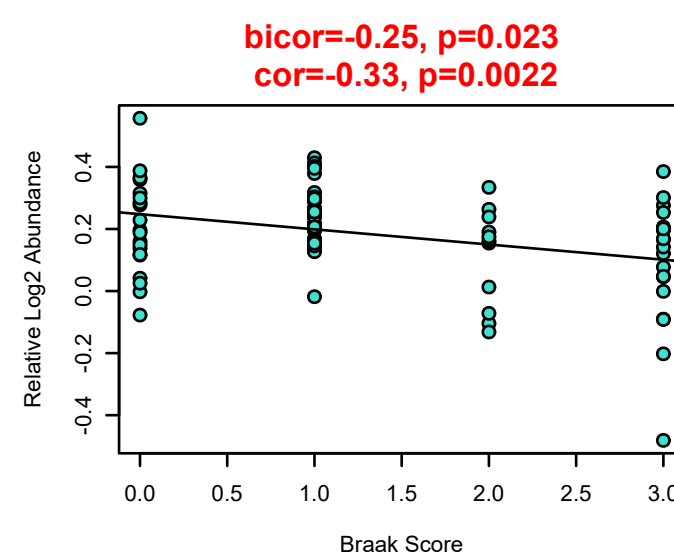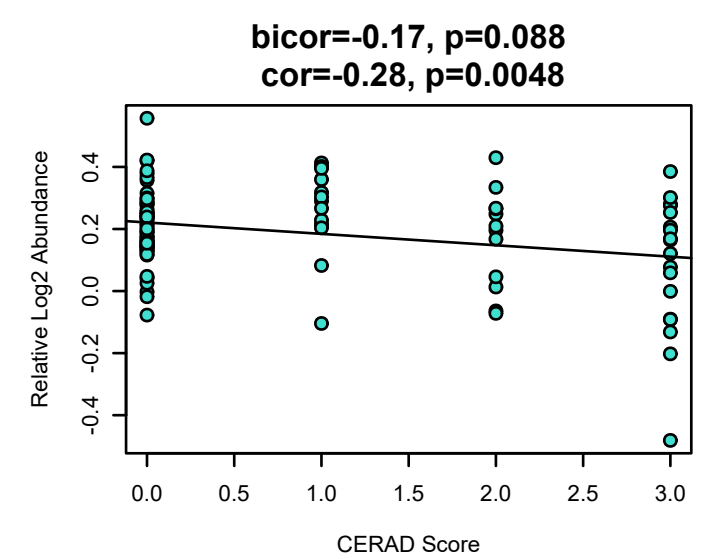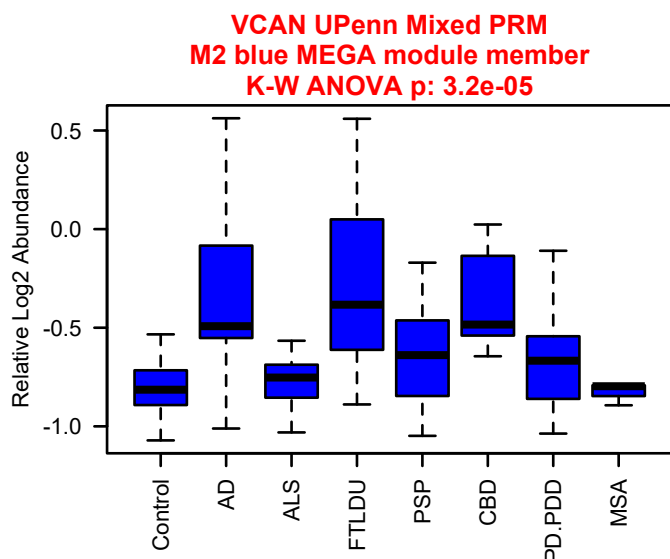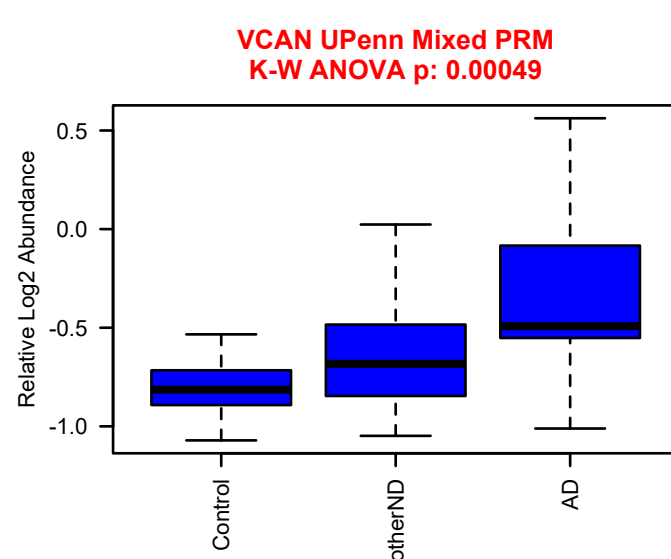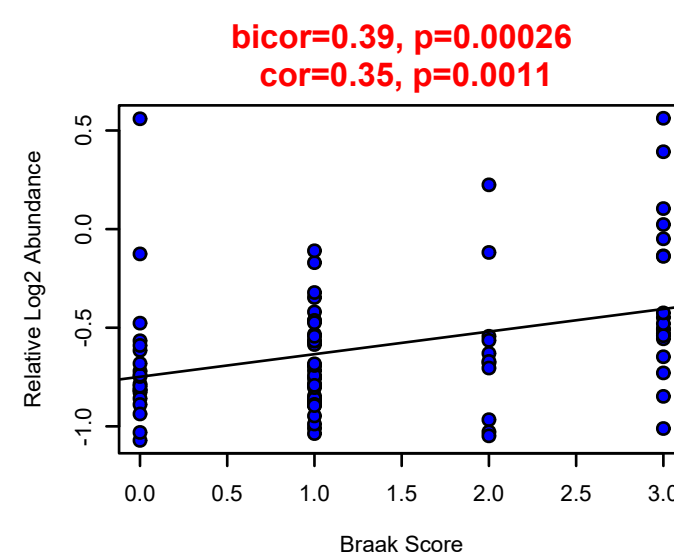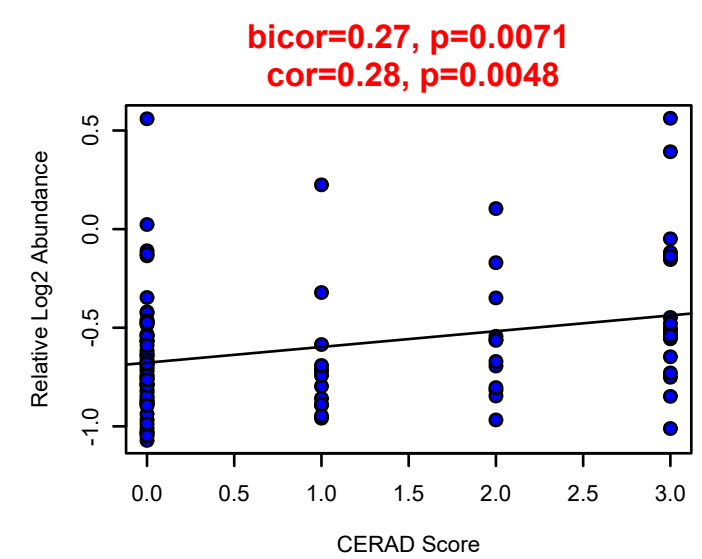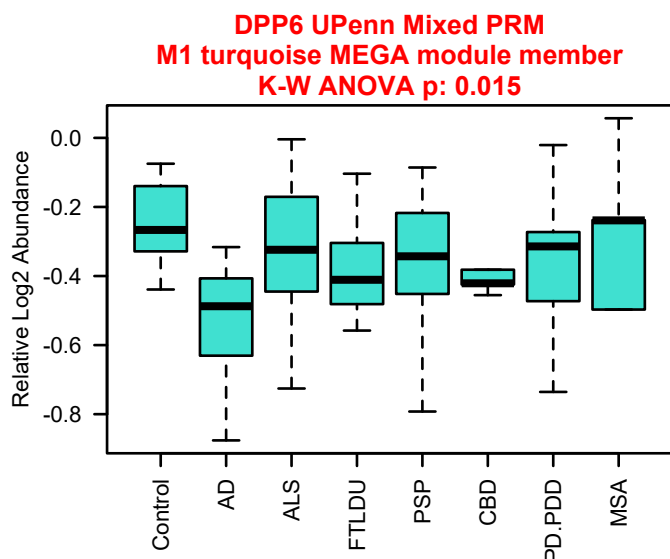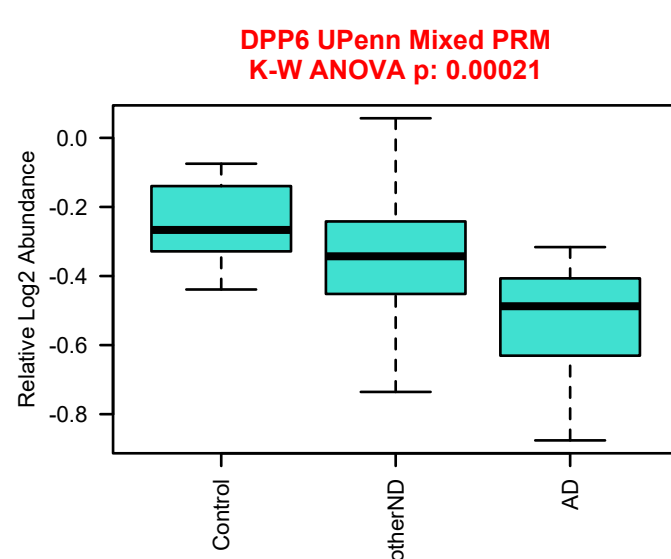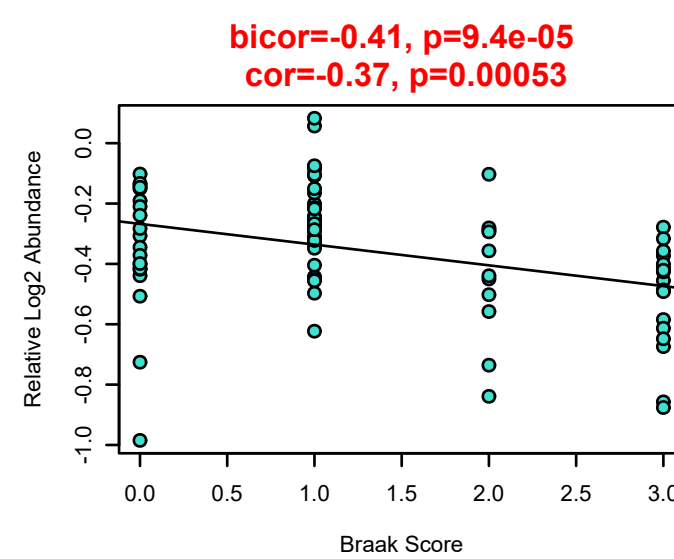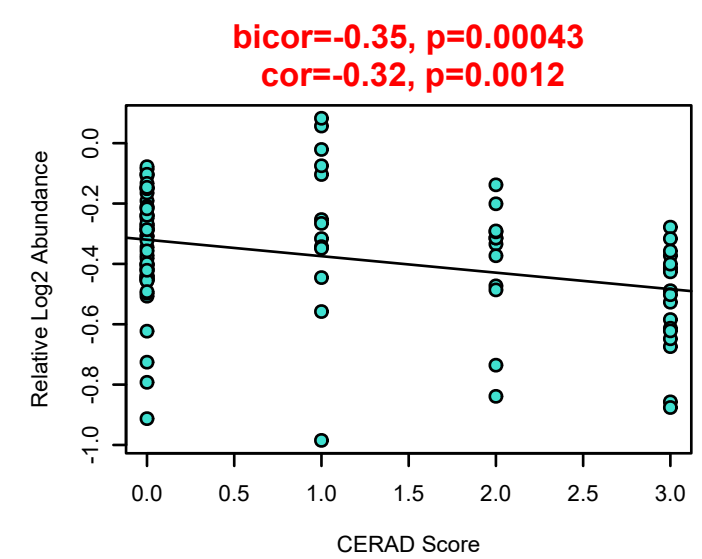

**CD81 UPenn Mixed PRM**  
M12 tan MEGA module member  
K-W ANOVA p: 0.13

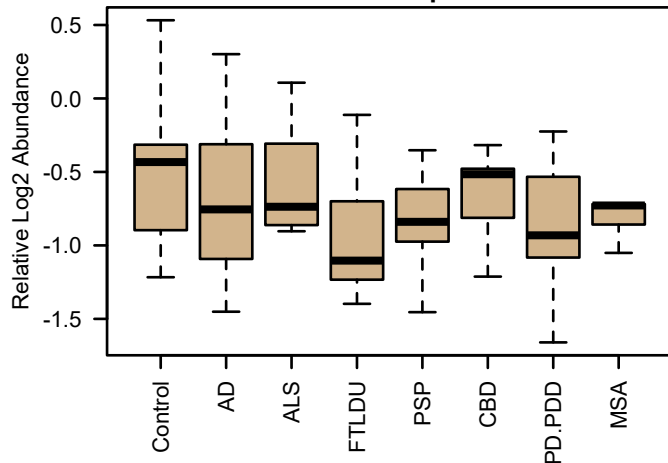

**CD81 UPenn Mixed PRM**  
K-W ANOVA p: 0.1

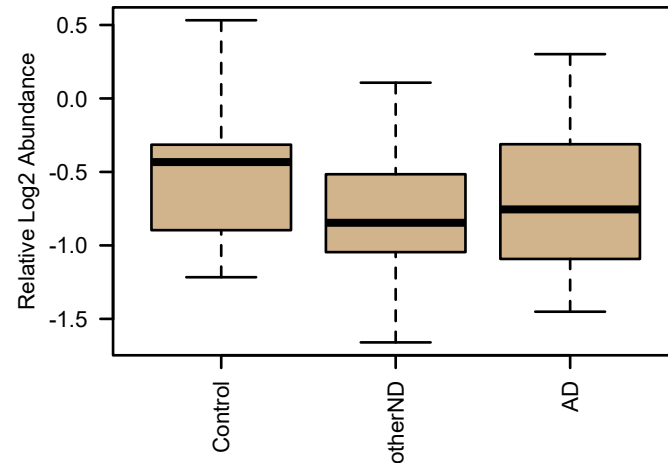

**bicor=-0.0055, p=0.96**  
**cor=-0.051, p=0.65**

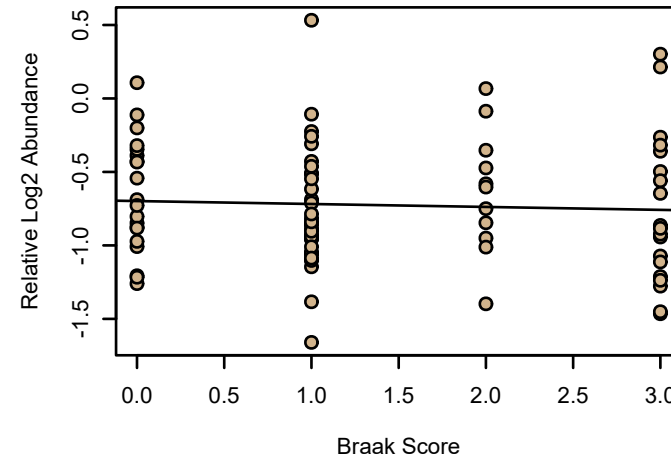

**bicor=-0.13, p=0.21**  
**cor=-0.086, p=0.39**

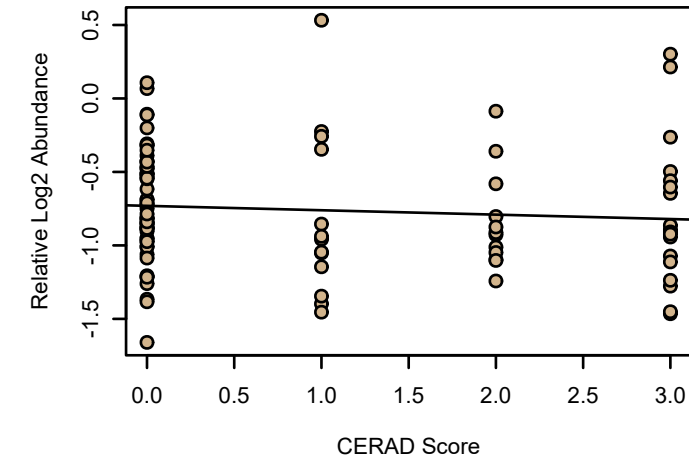

**NPEPPS UPenn Mixed PRM**  
M4 yellow MEGA module member  
K-W ANOVA p: 1.3e-05

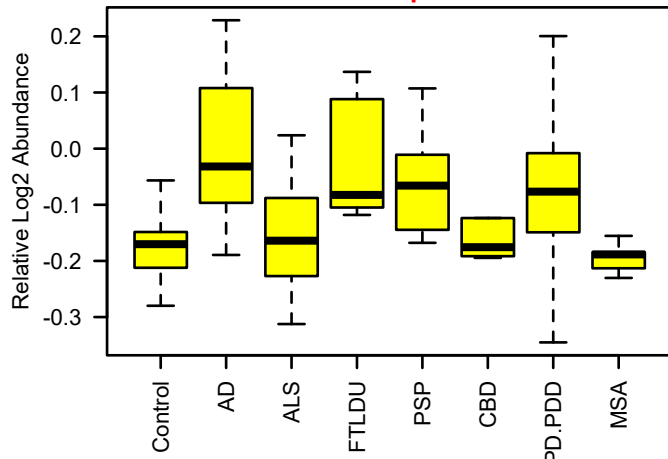

**NPEPPS UPenn Mixed PRM**  
K-W ANOVA p: 0.00054

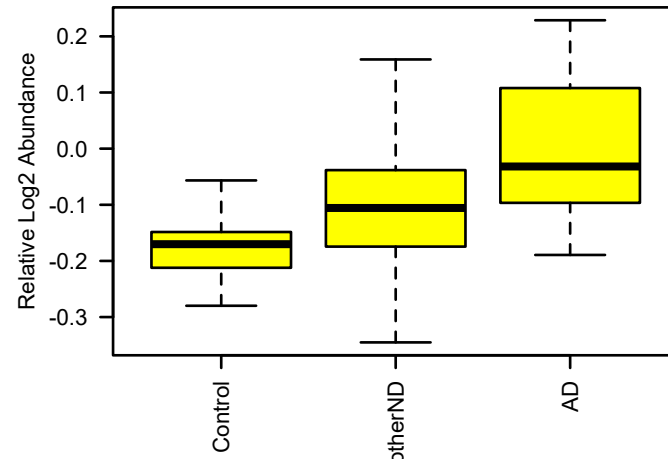

**bicor=0.37, p=0.00054**  
**cor=0.37, p=0.00053**

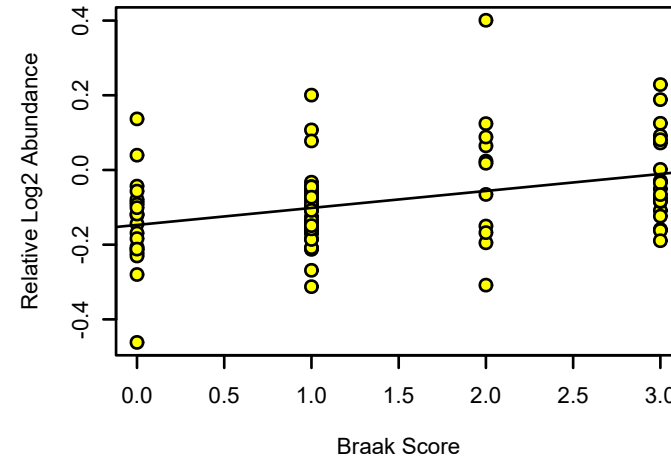

**bicor=0.39, p=6.5e-05**  
**cor=0.36, p=0.00023**

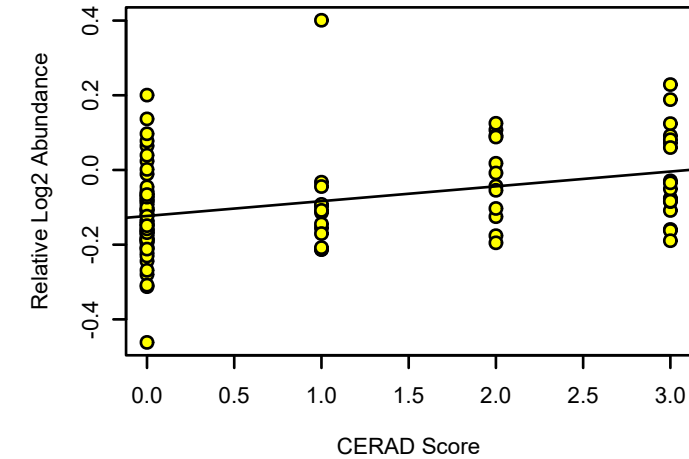

**NPEPPSL1 UPenn Mixed PRM**  
NA grey20 MEGA module member  
K-W ANOVA p: 0.016

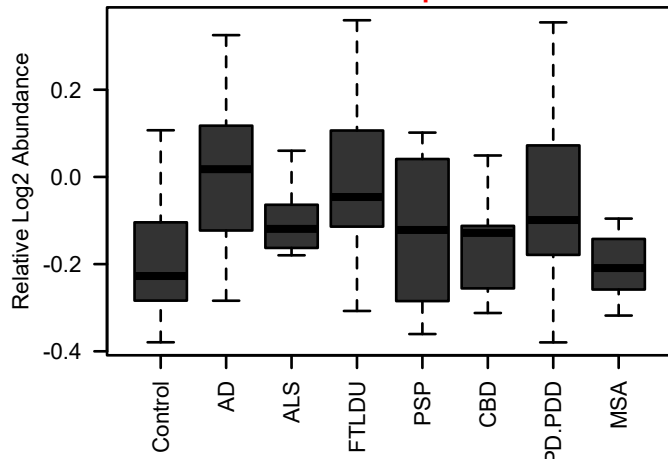

**NPEPPSL1 UPenn Mixed PRM**  
K-W ANOVA p: 0.0073

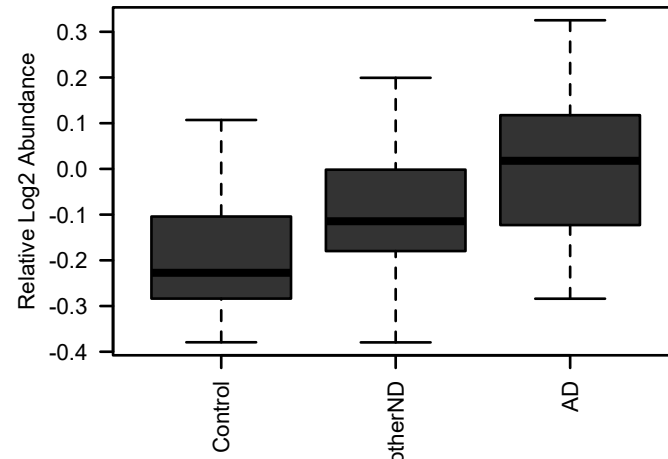

**bicor=0.27, p=0.015**  
**cor=0.27, p=0.013**

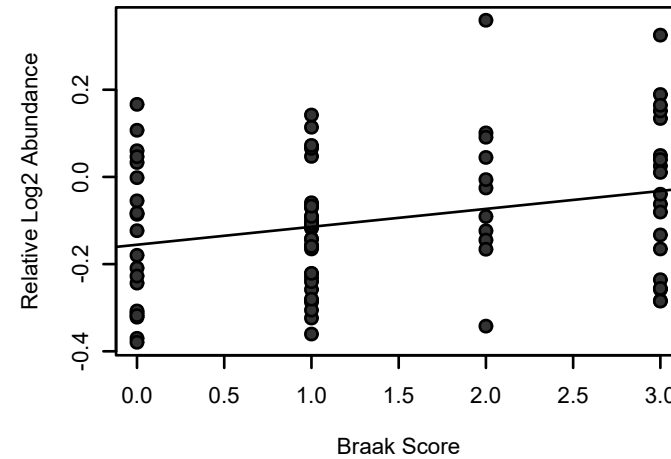

**bicor=0.32, p=0.0012**  
**cor=0.33, p=8e-04**

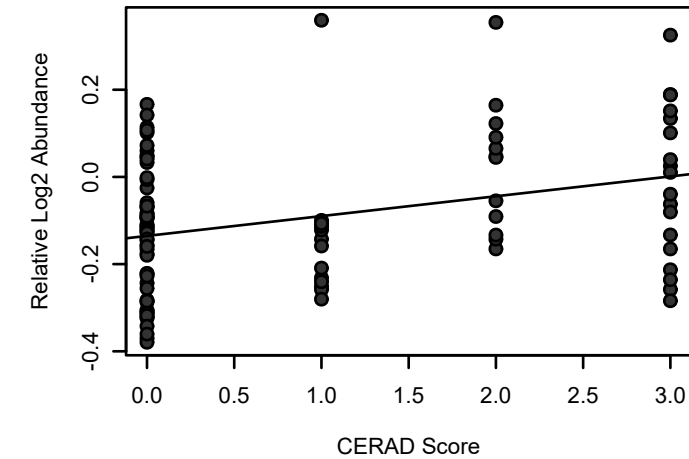

**NDUFS8 UPenn Mixed PRM**  
M3 brown MEGA module member  
K-W ANOVA p: 0.0011

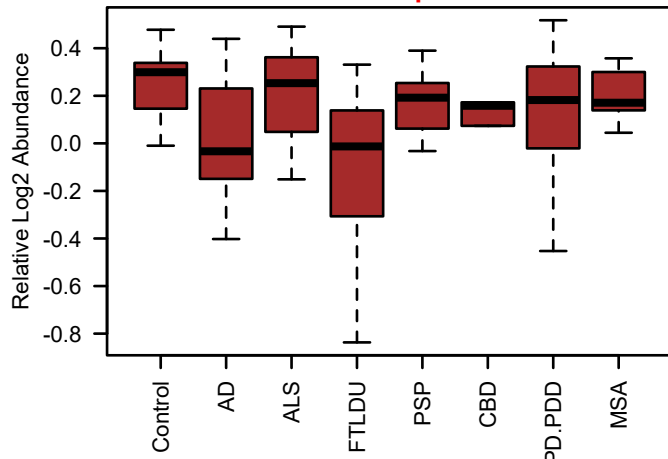

**NDUFS8 UPenn Mixed PRM**  
K-W ANOVA p: 0.0065

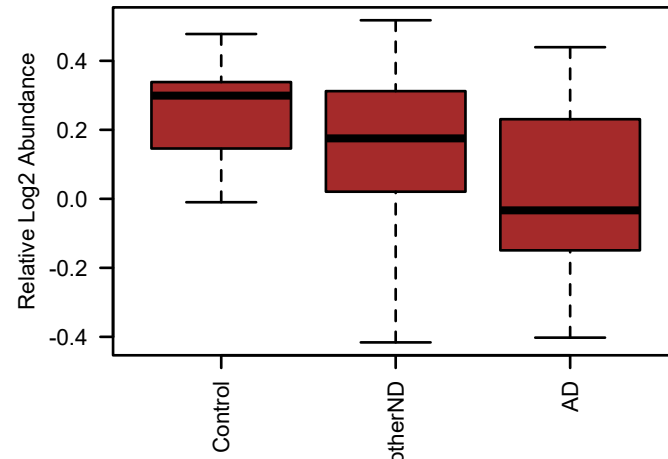

**bicor=-0.27, p=0.012**  
**cor=-0.25, p=0.022**

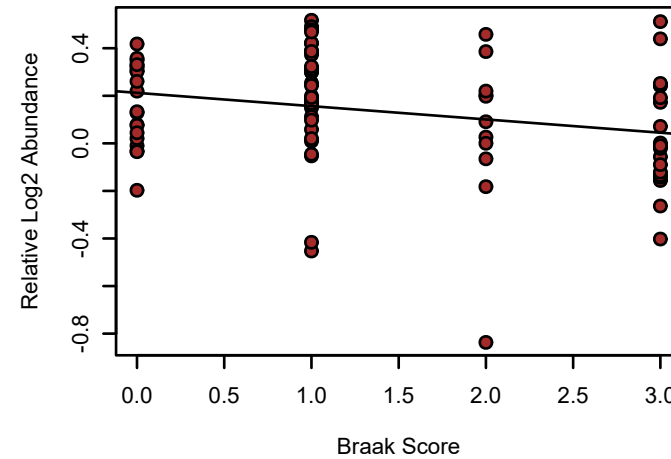

**bicor=-0.27, p=0.0074**  
**cor=-0.24, p=0.016**

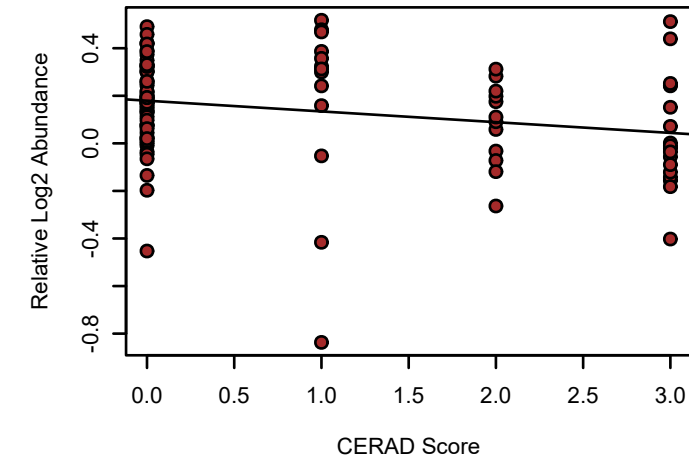

**MAPK3 UPenn Mixed PRM**  
M4 yellow MEGA module member  
K-W ANOVA p: 0.00037

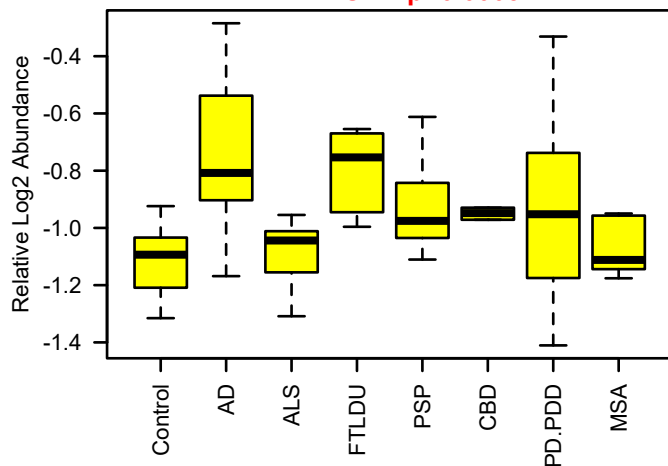

**MAPK3 UPenn Mixed PRM**  
K-W ANOVA p: 0.00034

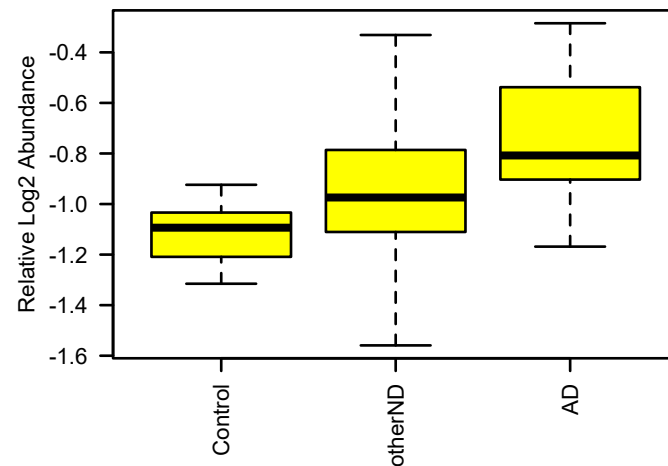

**bicor=0.44, p=2.4e-05**  
**cor=0.42, p=7e-05**

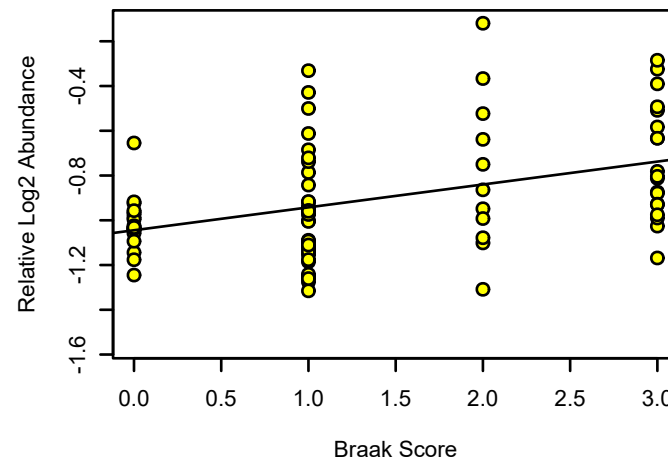

**bicor=0.38, p=9.9e-05**  
**cor=0.35, p=0.00036**

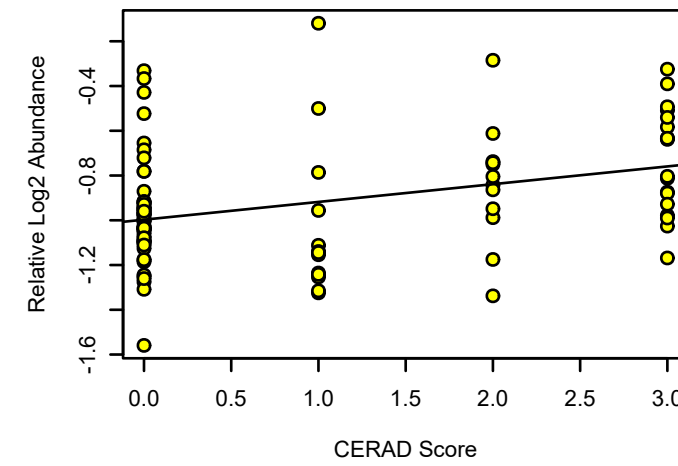

**ABLIM1 UPenn Mixed PRM**  
NA grey MEGA module member  
K-W ANOVA p: 0.0092

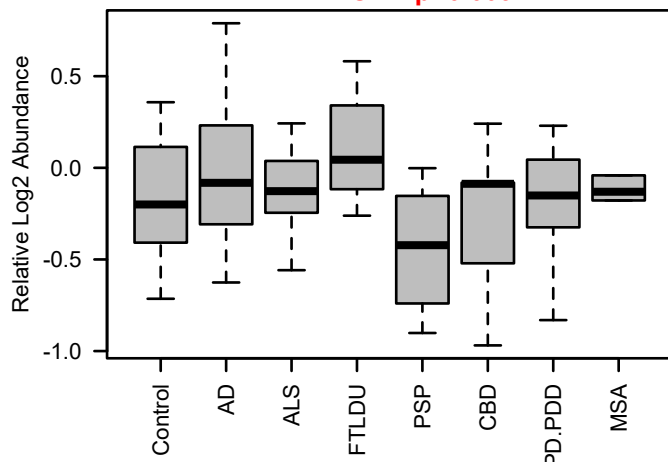

**ABLIM1 UPenn Mixed PRM**  
K-W ANOVA p: 0.22

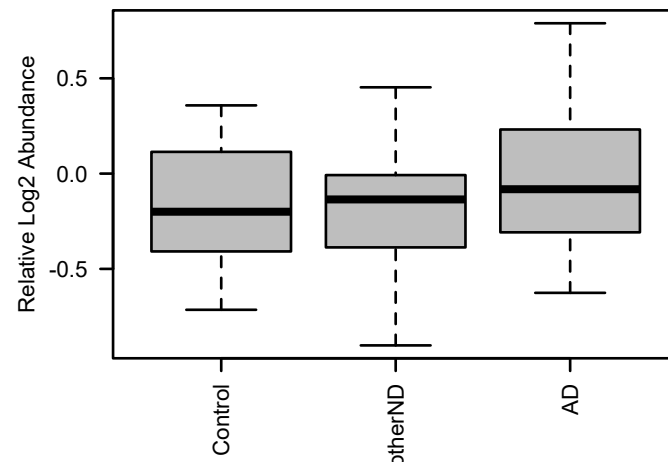

**bicor=0.056, p=0.62**  
**cor=0.085, p=0.44**

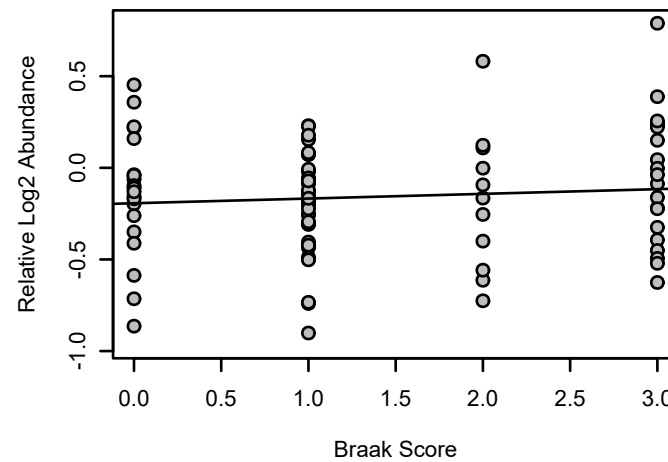

**bicor=0.068, p=0.5**  
**cor=0.078, p=0.44**

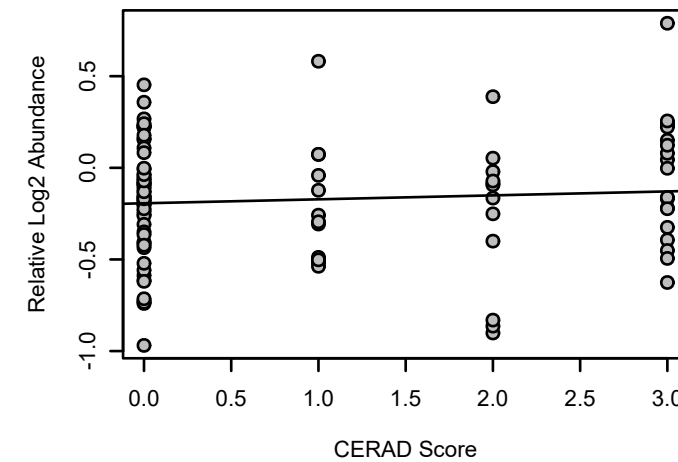

**NDUFV1 UPenn Mixed PRM**  
M3 brown MEGA module member  
K-W ANOVA p: 1.5e-07

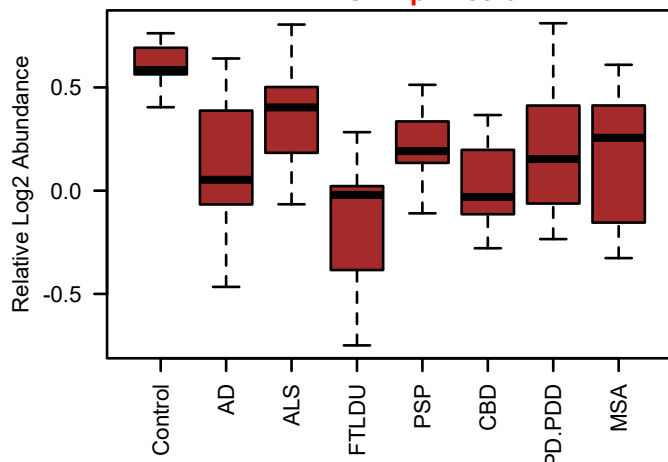

**NDUFV1 UPenn Mixed PRM**  
K-W ANOVA p: 1.7e-06

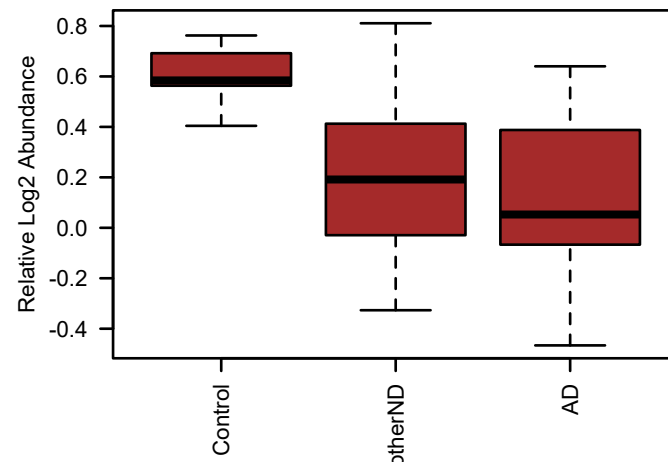

**bicor=-0.32, p=0.0029**  
**cor=-0.3, p=0.0056**

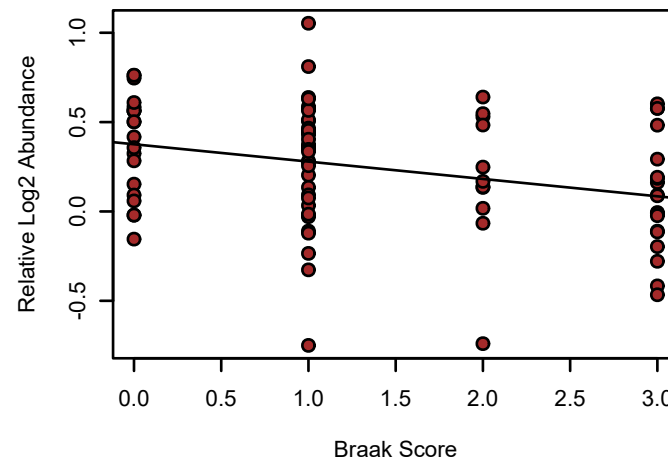

**bicor=-0.25, p=0.011**  
**cor=-0.24, p=0.016**

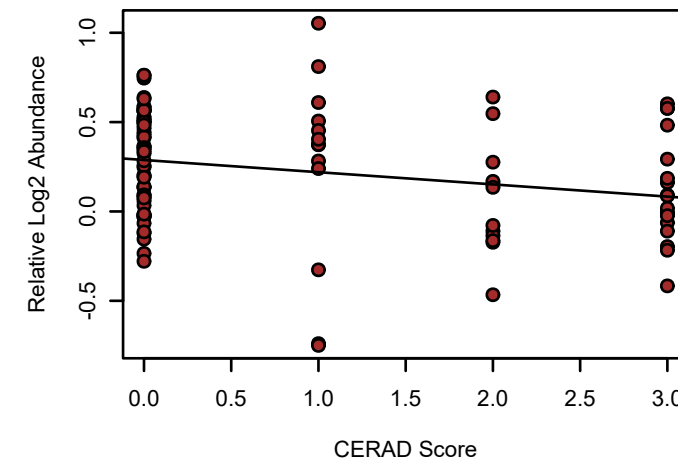

**TUBB4B UPenn Mixed PRM**  
M2 blue MEGA module member  
K-W ANOVA p: 0.48

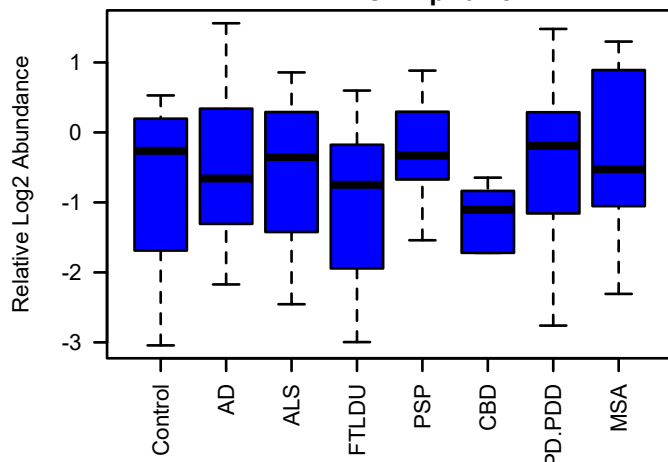

**TUBB4B UPenn Mixed PRM**  
K-W ANOVA p: 0.37

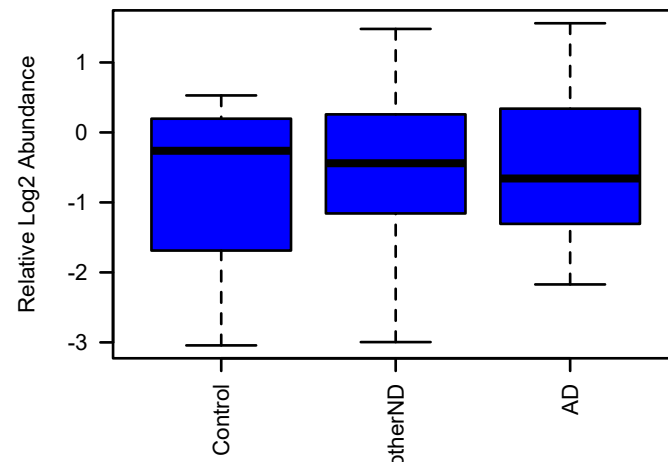

**bicor=0.0096, p=0.93**  
**cor=0.12, p=0.28**

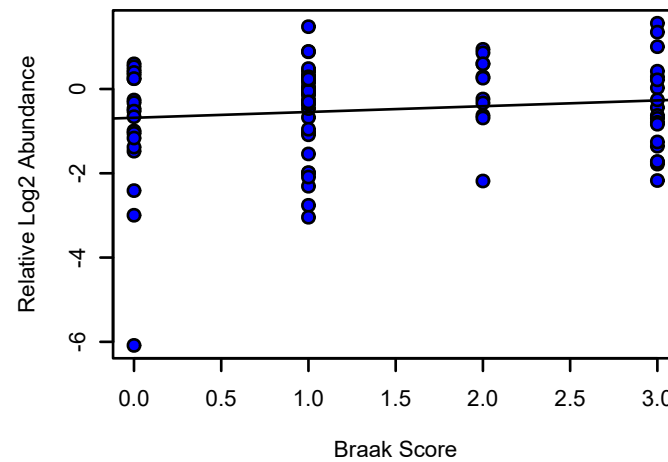

**bicor=0.058, p=0.57**  
**cor=0.1, p=0.32**

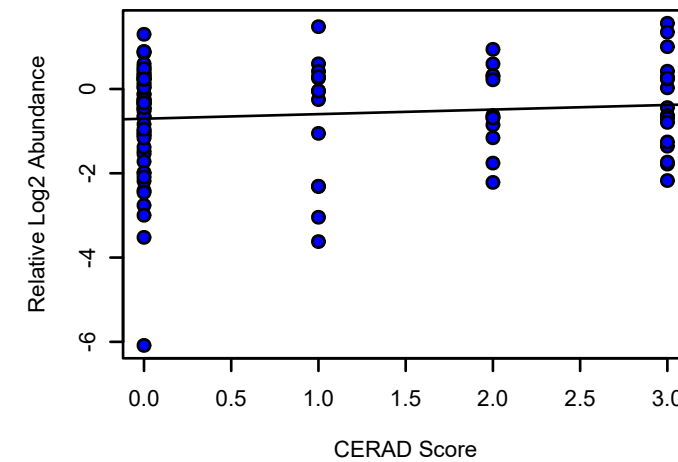



**SEPT5 UPenn Mixed PRM**  
**M1 turquoise MEGA module member**  
**K-W ANOVA p: 8.9e-09**

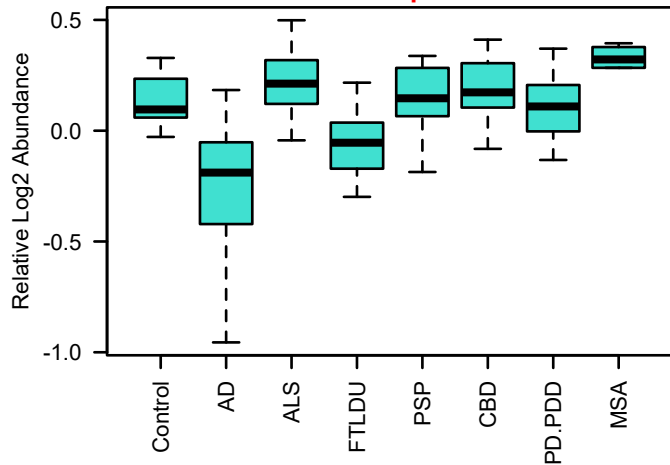

**SEPT5 UPenn Mixed PRM**  
**K-W ANOVA p: 2.2e-09**

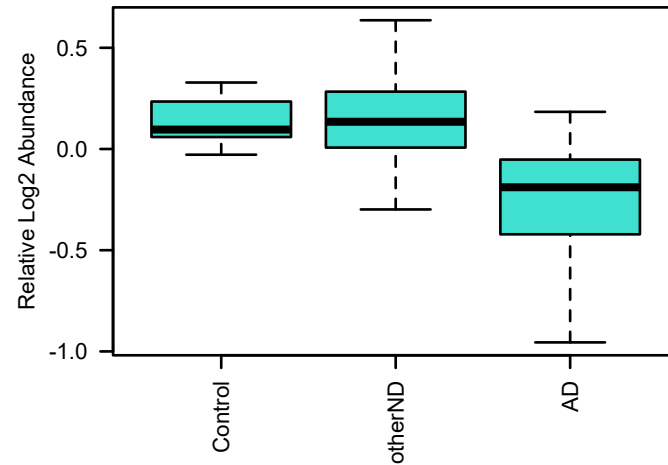

**bicor=-0.38, p=0.00037**  
**cor=-0.46, p=1.1e-05**

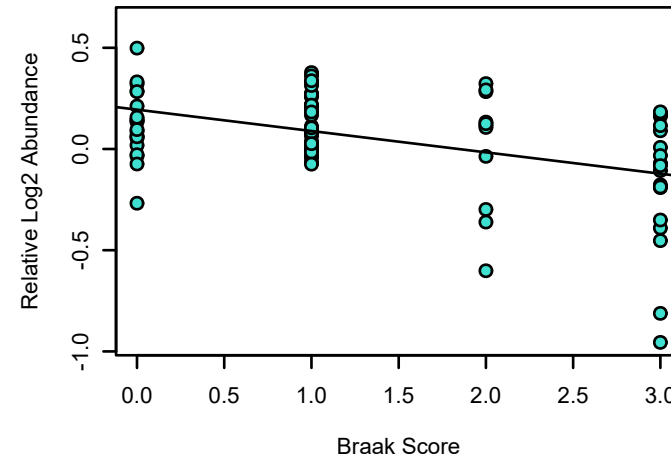

**bicor=-0.39, p=6.4e-05**  
**cor=-0.45, p=2.6e-06**

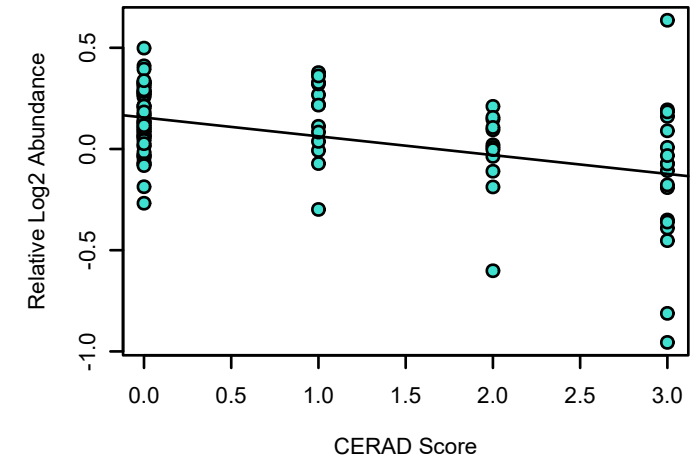

**TMPO UPenn Mixed PRM**  
**M10 purple MEGA module member**  
**K-W ANOVA p: 0.021**

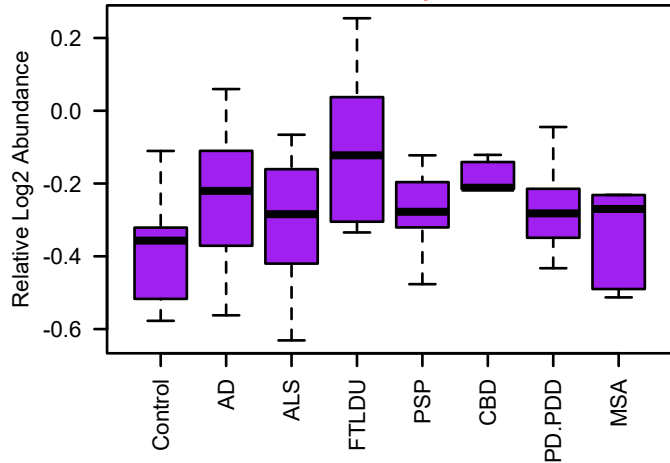

**TMPO UPenn Mixed PRM**  
**K-W ANOVA p: 0.042**

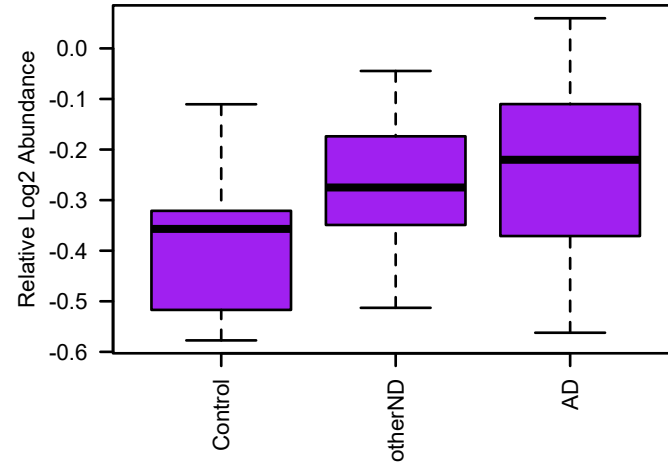

**bicor=0.21, p=0.055**  
**cor=0.25, p=0.022**

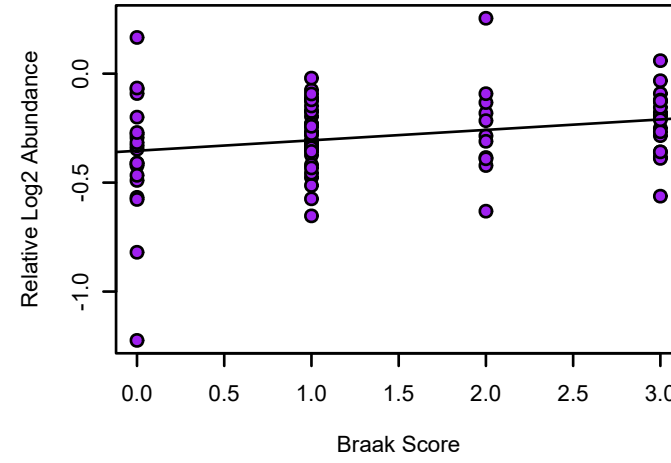

**bicor=0.11, p=0.27**  
**cor=0.14, p=0.16**

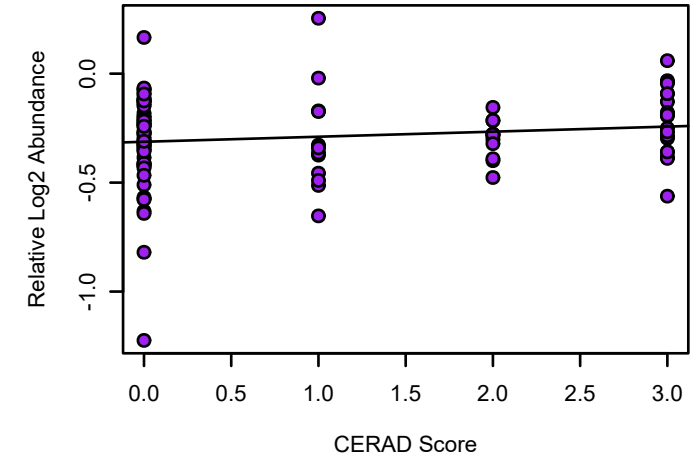

**DNM1L UPenn Mixed PRM**  
**M1 turquoise MEGA module member**  
**K-W ANOVA p: 0.39**

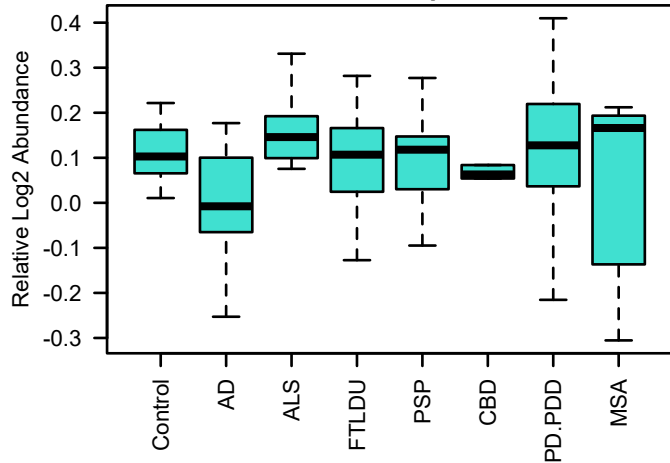

**DNM1L UPenn Mixed PRM**  
**K-W ANOVA p: 0.086**

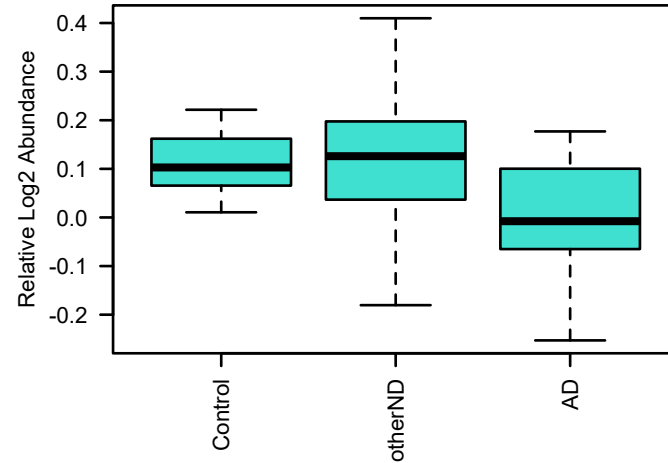

**bicor=-0.32, p=0.0029**  
**cor=-0.21, p=0.055**

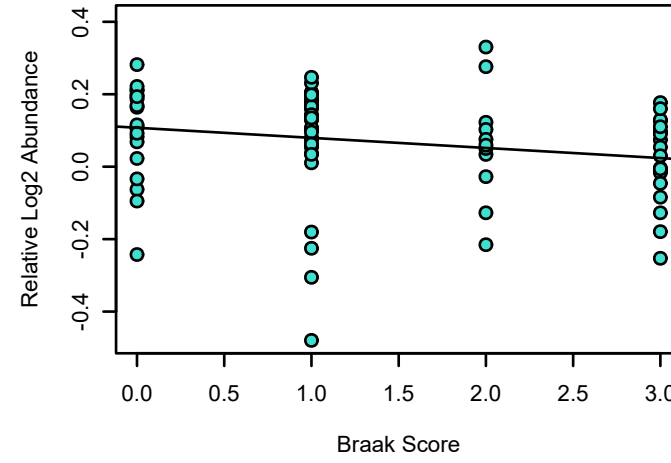

**bicor=-0.27, p=0.0074**  
**cor=-0.21, p=0.036**

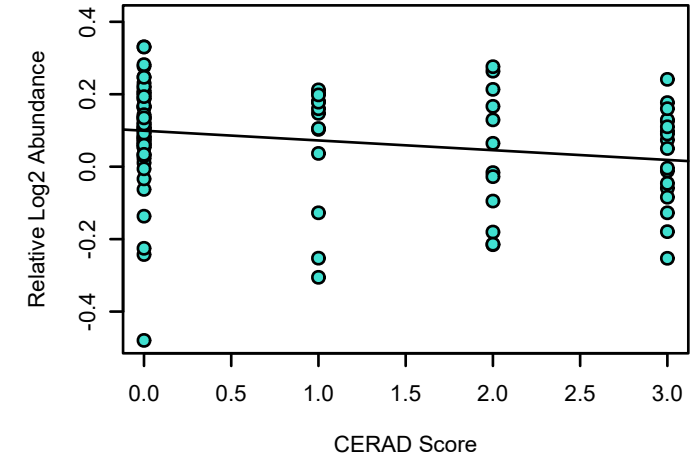

**CD44 UPenn Mixed PRM**  
**M4 yellow MEGA module member**  
**K-W ANOVA p: 1.7e-06**

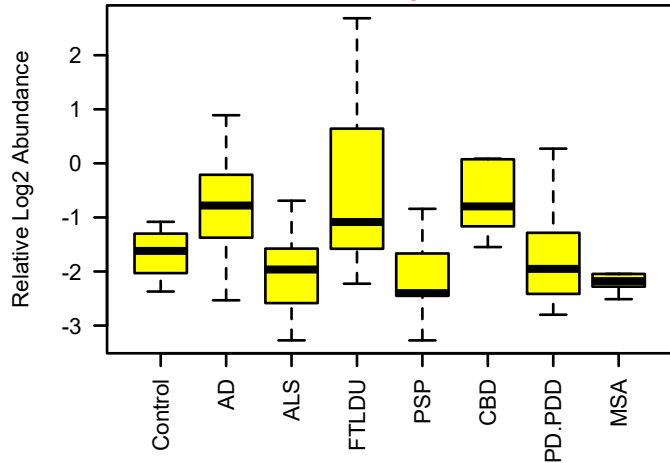

**CD44 UPenn Mixed PRM**  
**K-W ANOVA p: 0.0019**

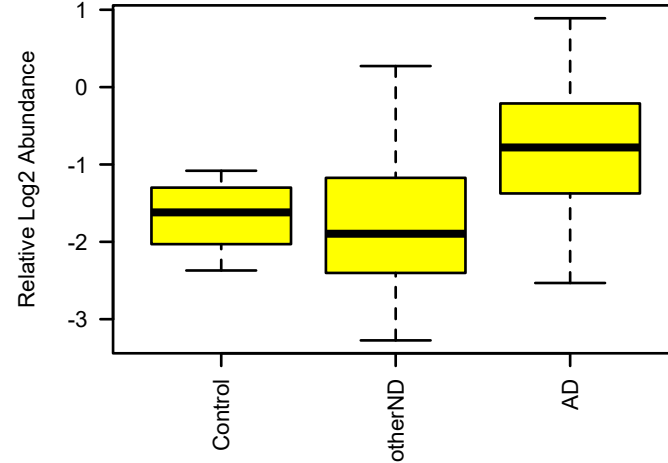

**bicor=0.4, p=0.00015**  
**cor=0.39, p=0.00025**

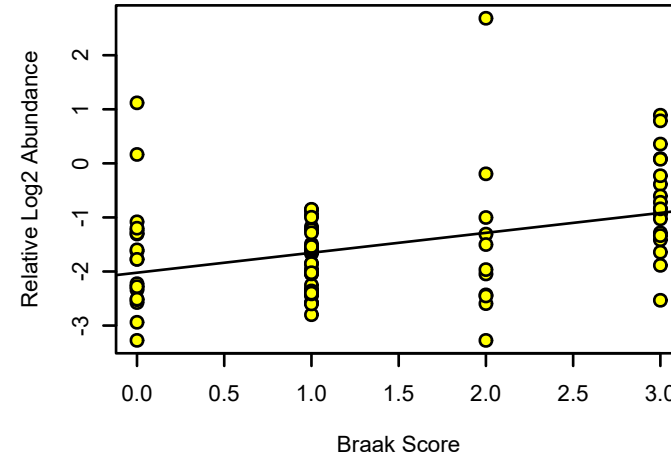

**bicor=0.34, p=6e-04**  
**cor=0.3, p=0.0024**

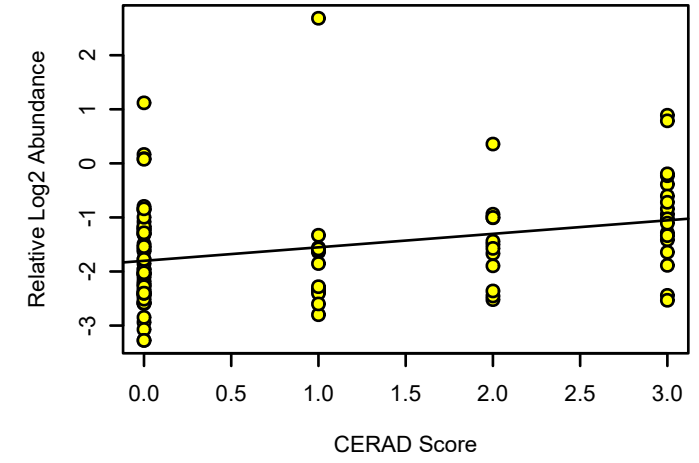

**CRIP2 UPenn Mixed PRM**  
**M6 red MEGA module member**  
**K-W ANOVA p: 0.012**

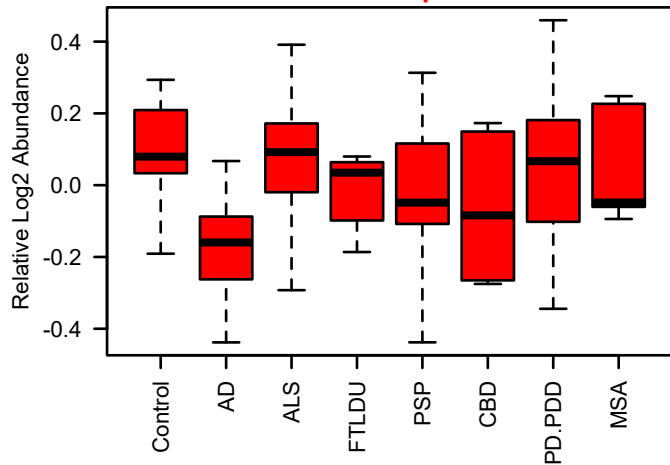

**CRIP2 UPenn Mixed PRM**  
**K-W ANOVA p: 0.00041**

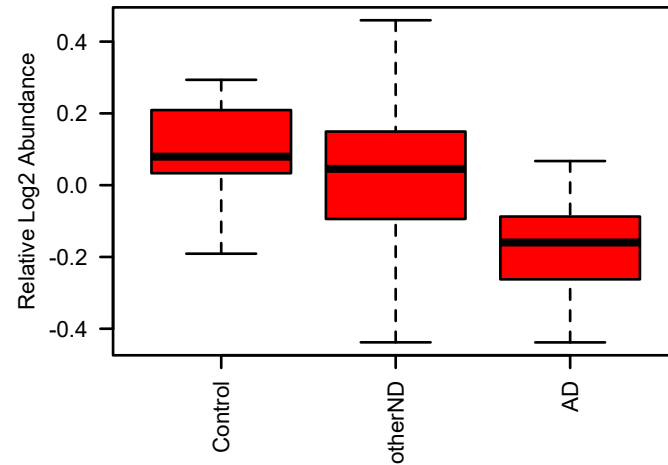

**bicor=-0.28, p=0.0094**  
**cor=-0.26, p=0.017**

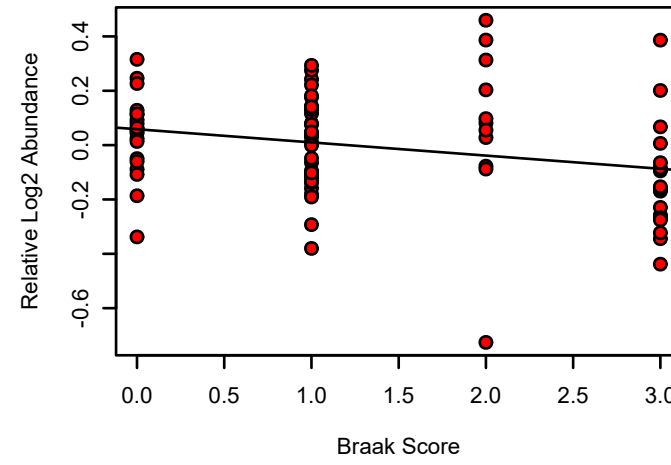

**bicor=-0.25, p=0.012**  
**cor=-0.26, p=0.009**

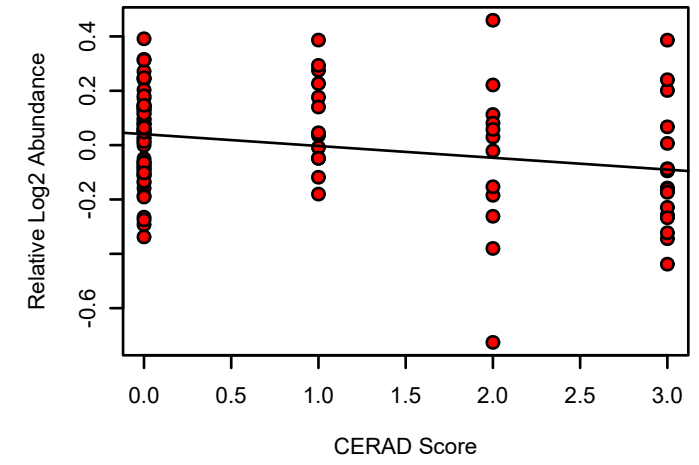

**ANKS1B UPenn Mixed PRM**  
**M1 turquoise MEGA module member**  
**K-W ANOVA p: 1.6e-05**

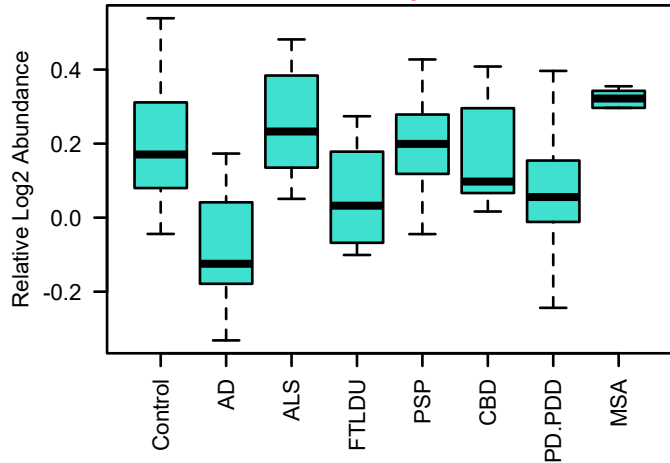

**ANKS1B UPenn Mixed PRM**  
**K-W ANOVA p: 2.1e-05**

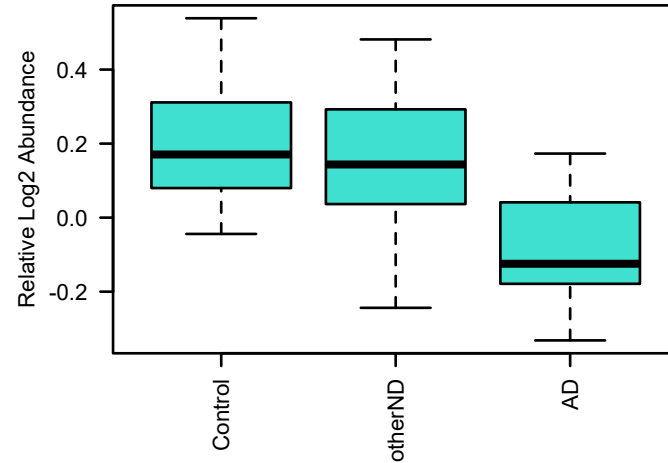

**bicor=-0.31, p=0.0041**  
**cor=-0.29, p=0.0075**

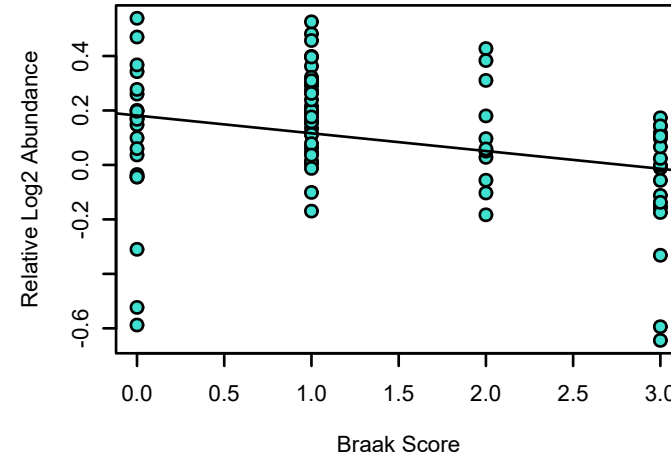

**bicor=-0.38, p=9.6e-05**  
**cor=-0.36, p=0.00023**

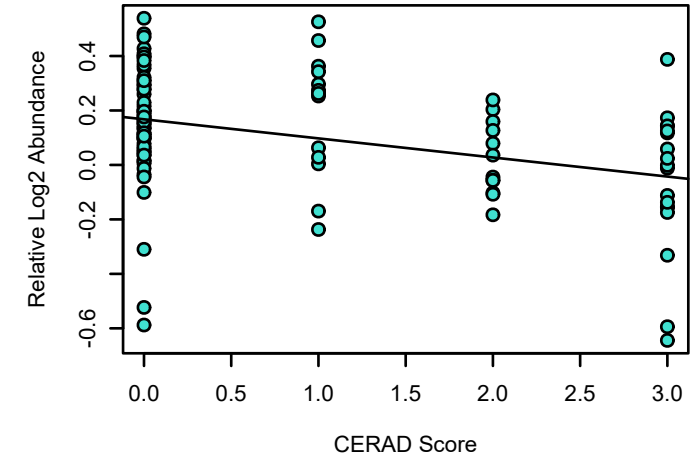

**ANP32A UPenn Mixed PRM**  
**M10 purple MEGA module member**  
**K-W ANOVA p: 3e-06**

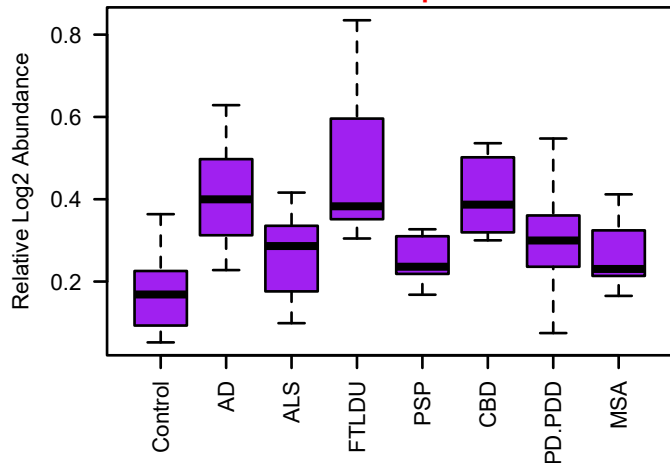

**ANP32A UPenn Mixed PRM**  
**K-W ANOVA p: 2.8e-05**

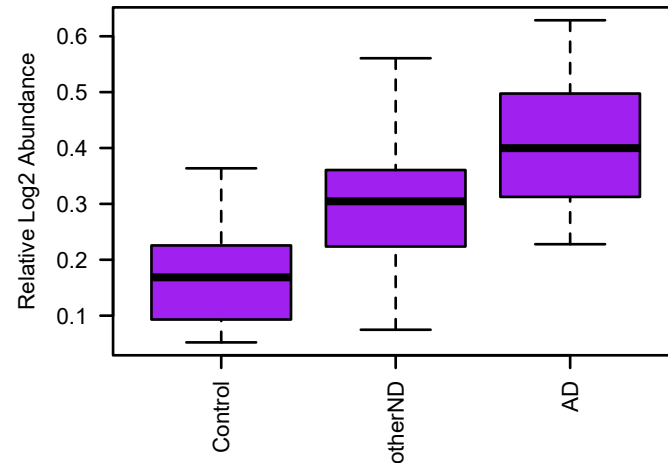

**bicor=0.43, p=4.9e-05**  
**cor=0.41, p=0.00011**

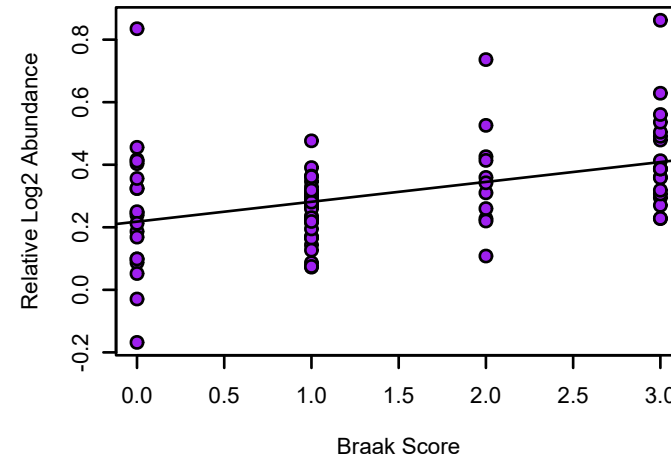

**bicor=0.23, p=0.023**  
**cor=0.22, p=0.028**

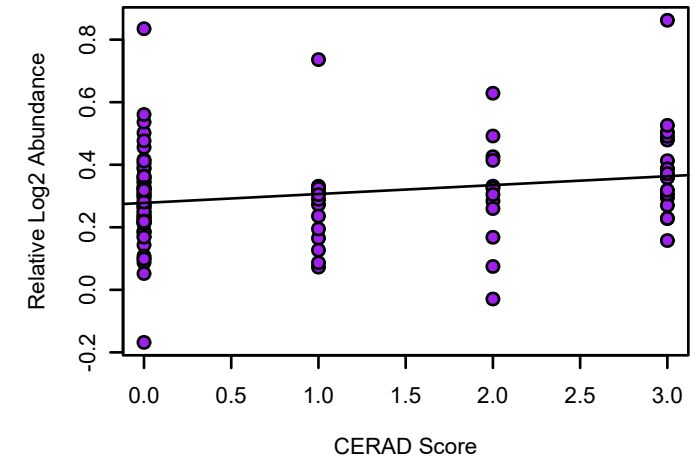

**NCAM2 UPenn Mixed PRM**  
**NA grey MEGA module member**  
**K-W ANOVA p: 0.025**

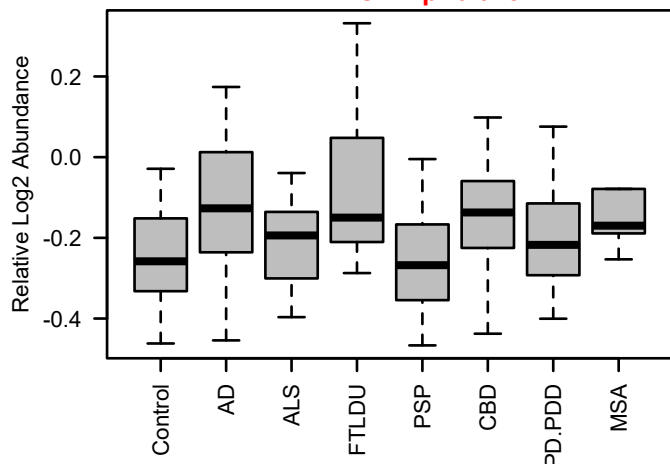

**NCAM2 UPenn Mixed PRM**  
**K-W ANOVA p: 0.066**

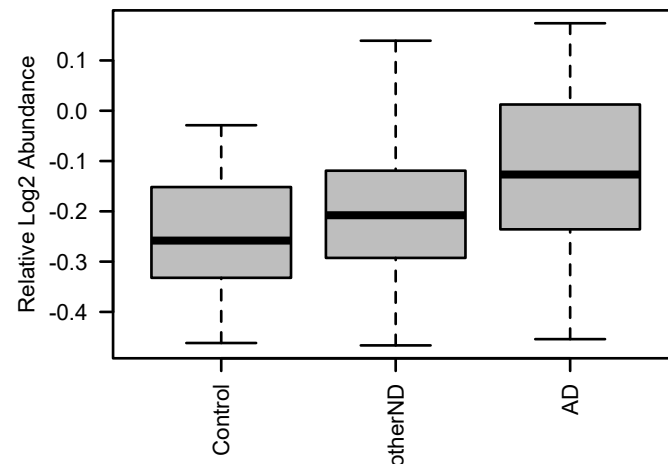

**bicor=0.25, p=0.019**  
**cor=0.24, p=0.028**

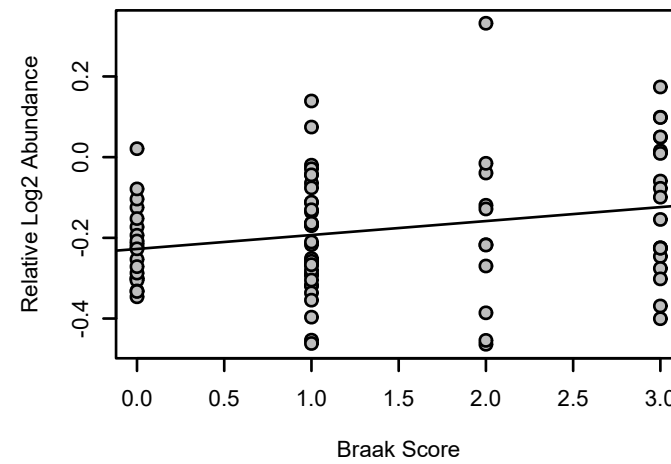

**bicor=0.21, p=0.032**  
**cor=0.22, p=0.028**

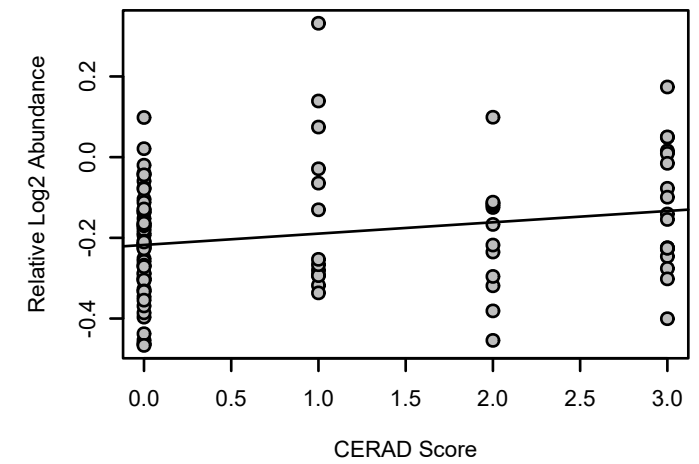

**ACTN1 UPenn Mixed PRM**  
M1 turquoise MEGA module member  
K-W ANOVA p: 5.8e-07

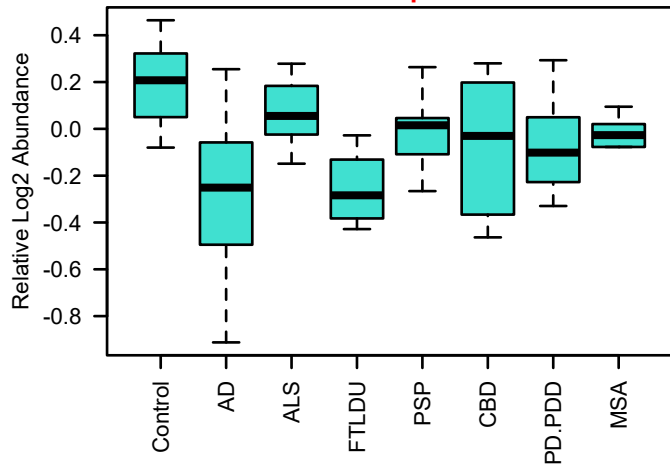

**ACTN1 UPenn Mixed PRM**  
K-W ANOVA p: 2.7e-06

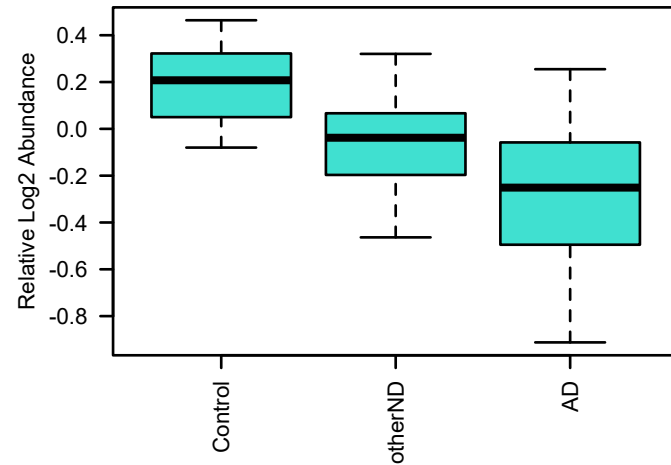

**bicor=-0.36, p=0.00076**  
**cor=-0.4, p=0.00016**

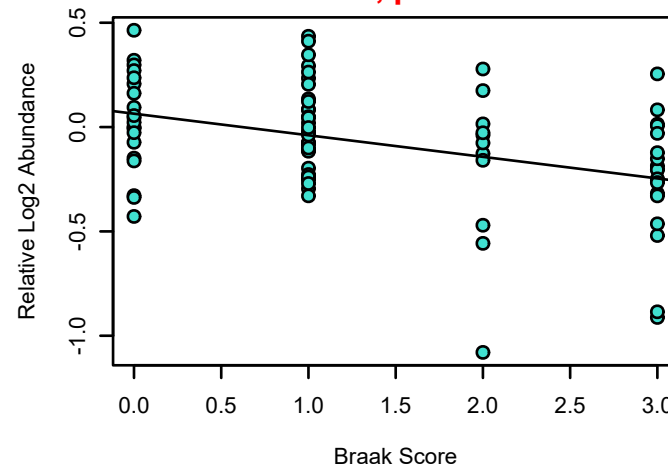

**bicor=-0.34, p=0.00055**  
**cor=-0.35, p=0.00036**

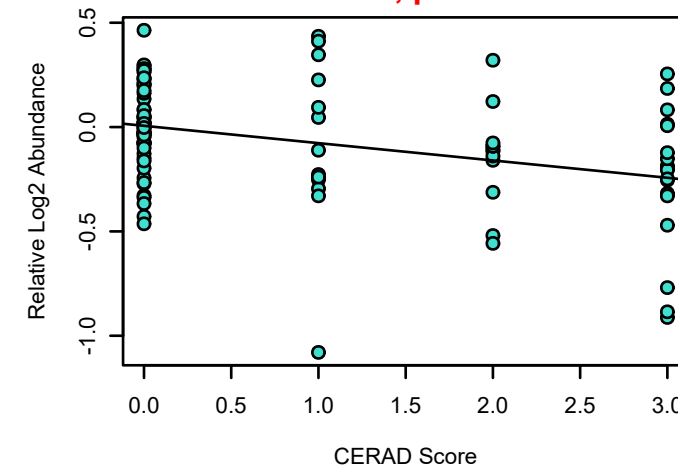

**SYT1 UPenn Mixed PRM**  
M1 turquoise MEGA module member  
K-W ANOVA p: 0.011

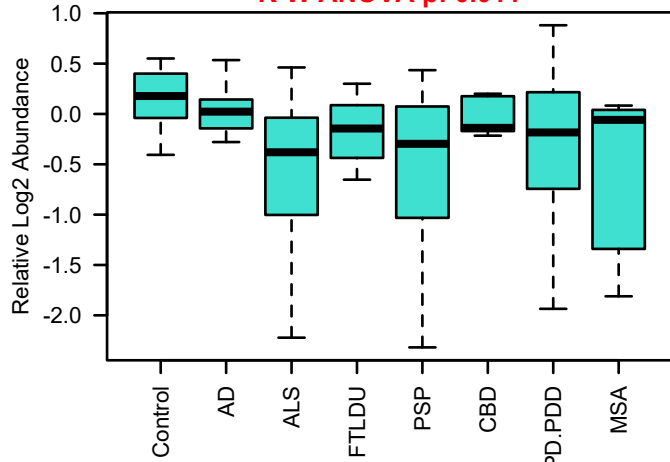

**SYT1 UPenn Mixed PRM**  
K-W ANOVA p: 0.00094

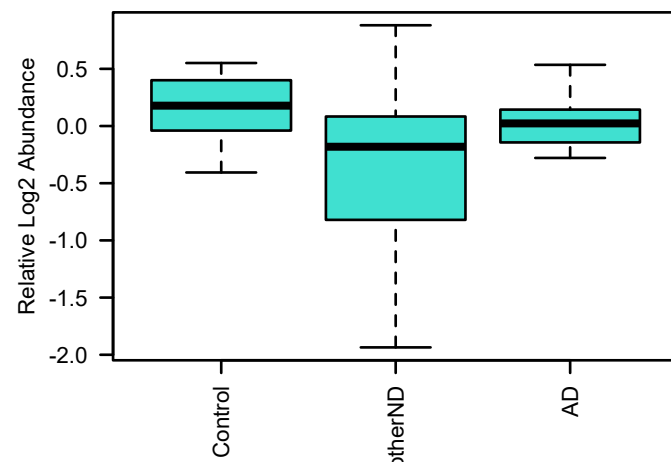

**bicor=-0.095, p=0.39**  
**cor=0.013, p=0.91**

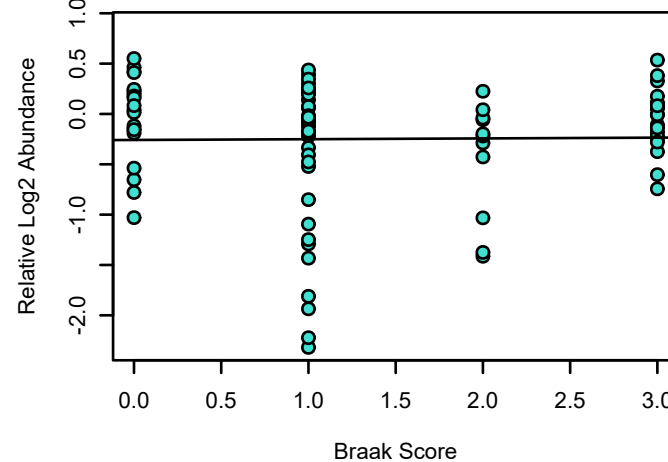

**bicor=0.1, p=0.32**  
**cor=0.1, p=0.32**

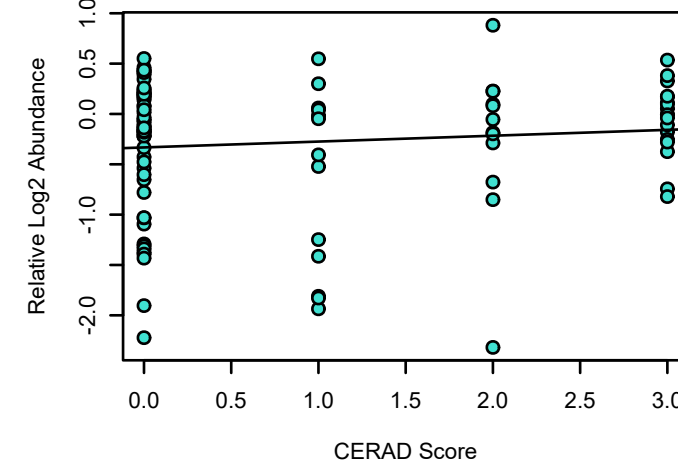

**SRSF2 UPenn Mixed PRM**  
M10 purple MEGA module member  
K-W ANOVA p: 0.057

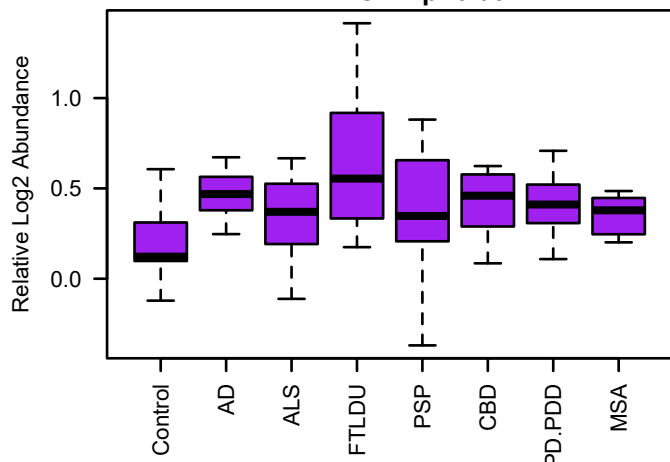

**SRSF2 UPenn Mixed PRM**  
K-W ANOVA p: 0.063

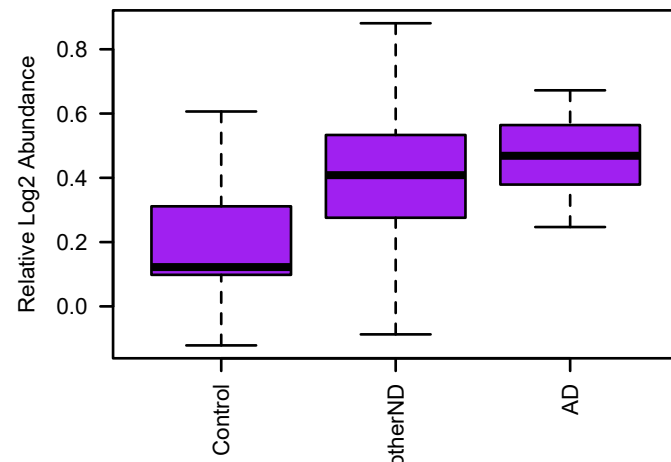

**bicor=0.27, p=0.012**  
**cor=0.057, p=0.61**

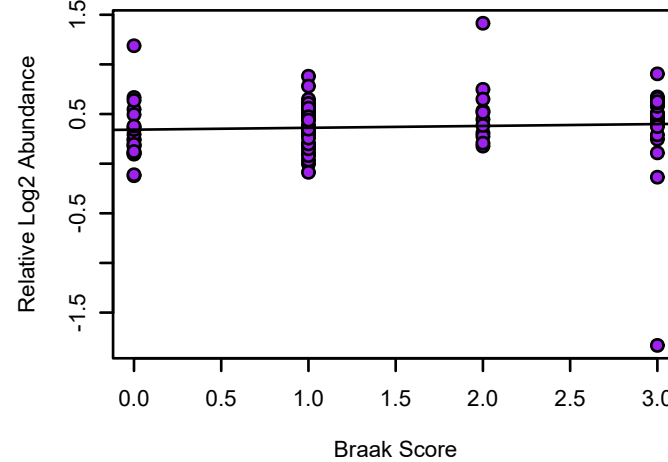

**bicor=0.19, p=0.056**  
**cor=0.17, p=0.091**

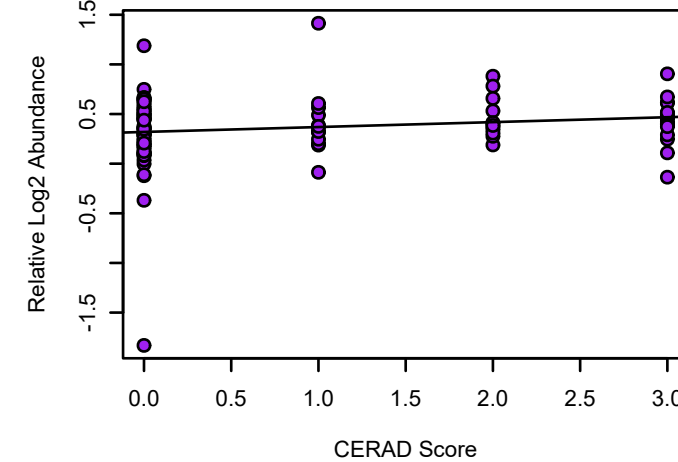

**LONP1 UPenn Mixed PRM**  
M3 brown MEGA module member  
K-W ANOVA p: 0.37

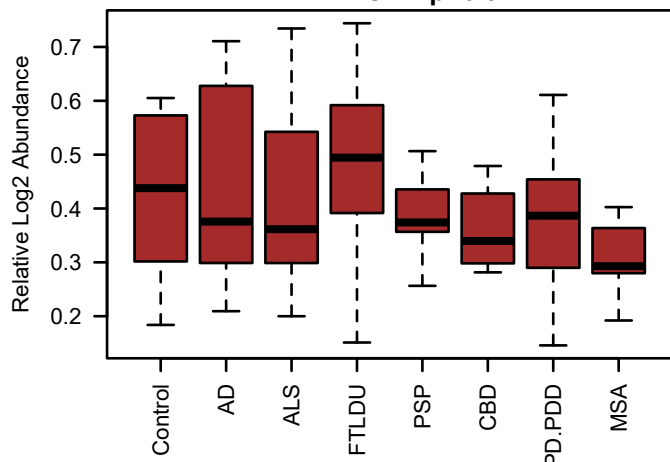

**LONP1 UPenn Mixed PRM**  
K-W ANOVA p: 0.38

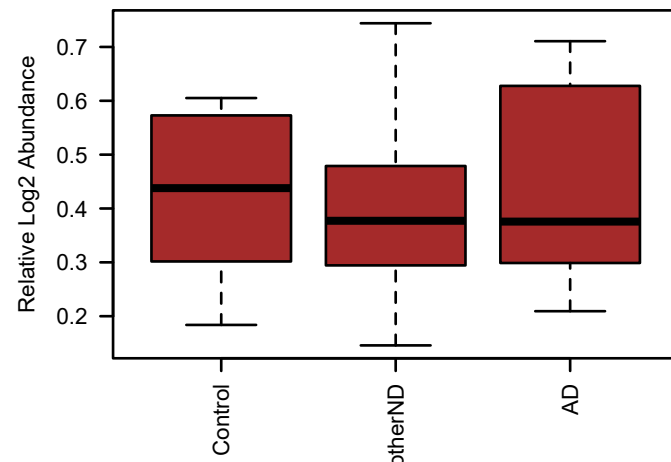

**bicor=0.018, p=0.87**  
**cor=0.026, p=0.81**

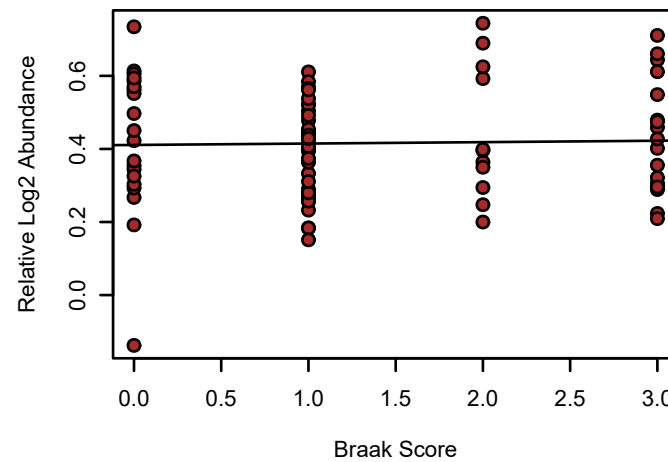

**bicor=-0.071, p=0.48**  
**cor=-0.069, p=0.5**

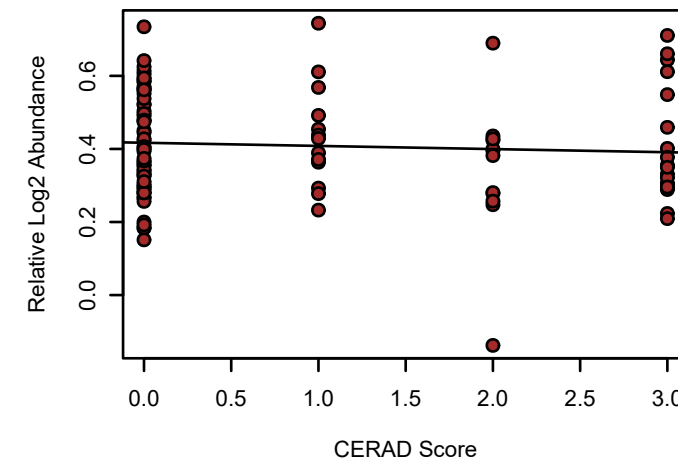



**RPS5 UPenn Mixed PRM**  
**M12 tan MEGA module member**  
**K-W ANOVA p: 0.0019**

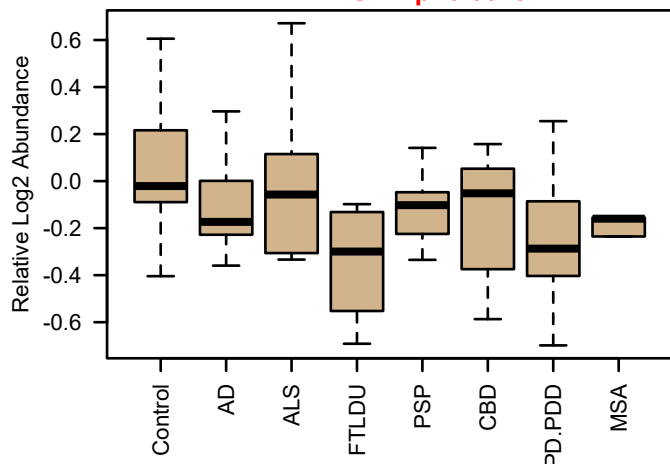

**RPS5 UPenn Mixed PRM**  
**K-W ANOVA p: 0.0019**

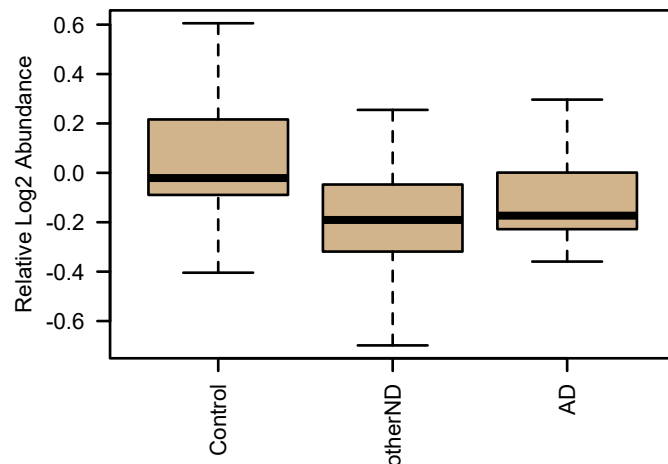

**bicor=0.0041, p=0.97**  
**cor=0.0071, p=0.95**

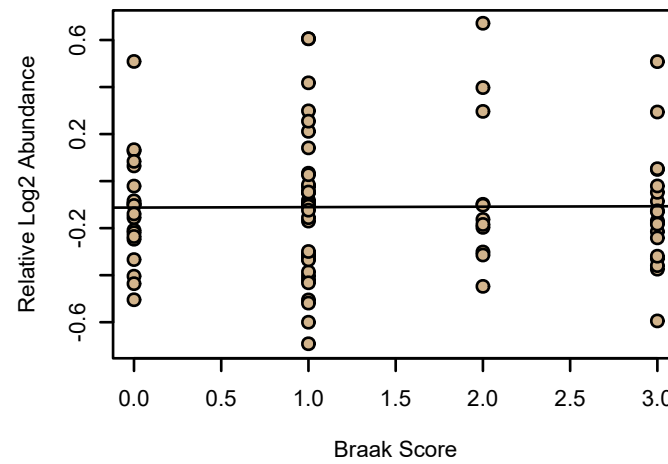

**bicor=-0.055, p=0.59**  
**cor=-0.059, p=0.56**

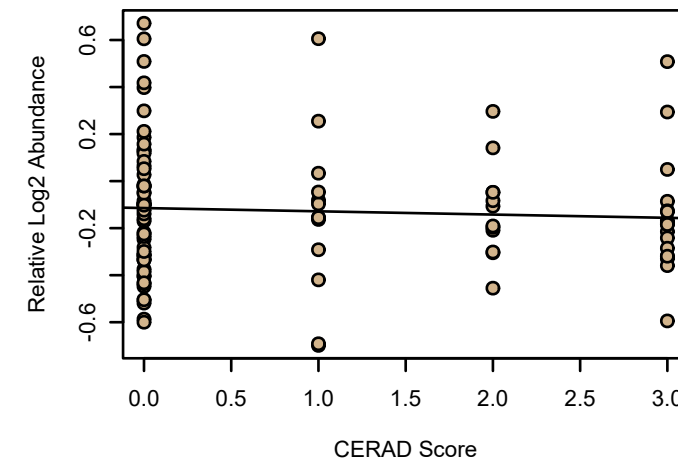

**PAFAH1B3 UPenn Mixed PRM**  
**M4 yellow MEGA module member**  
**K-W ANOVA p: 1.2e-08**

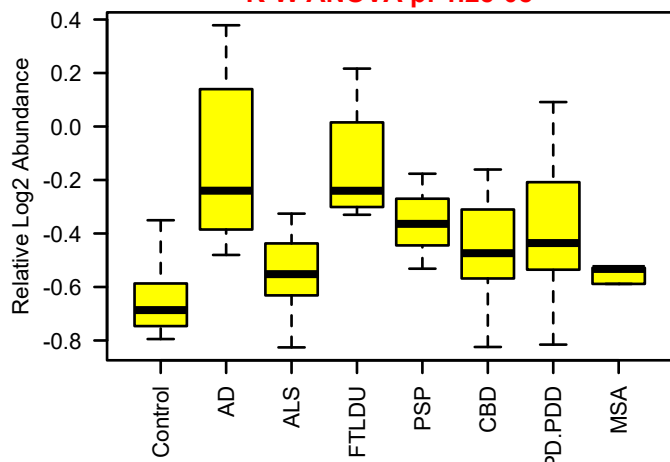

**PAFAH1B3 UPenn Mixed PRM**  
**K-W ANOVA p: 8.8e-07**

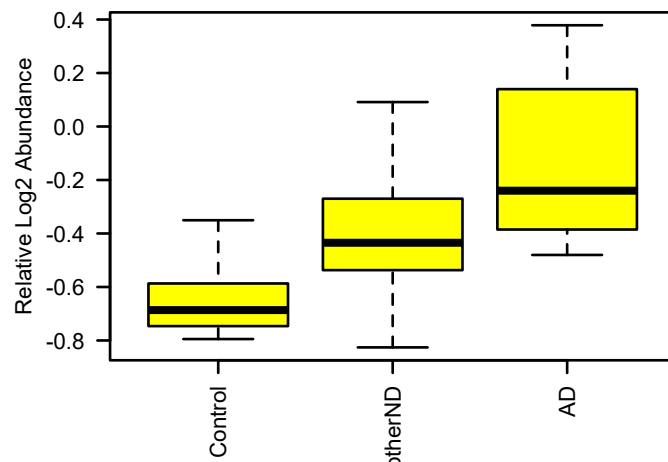

**bicor=0.46, p=8.6e-06**  
**cor=0.45, p=1.7e-05**

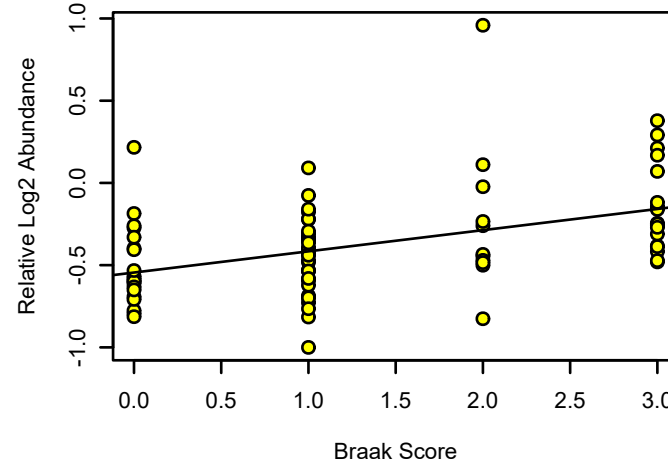

**bicor=0.43, p=8.6e-06**  
**cor=0.39, p=6e-05**

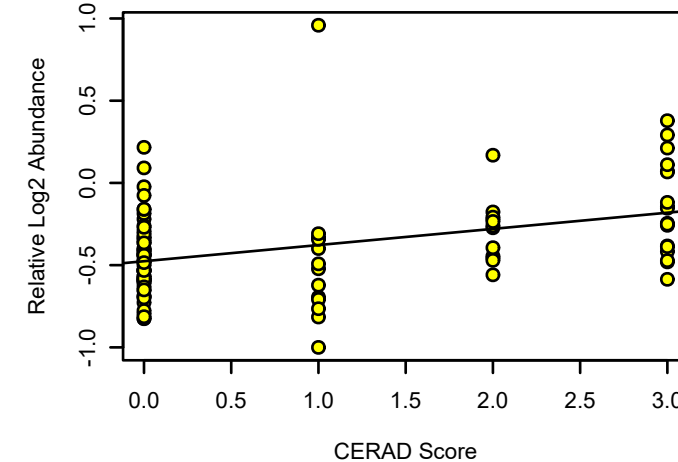

**RPL18A UPenn Mixed PRM**  
**M7 black MEGA module member**  
**K-W ANOVA p: 0.0015**

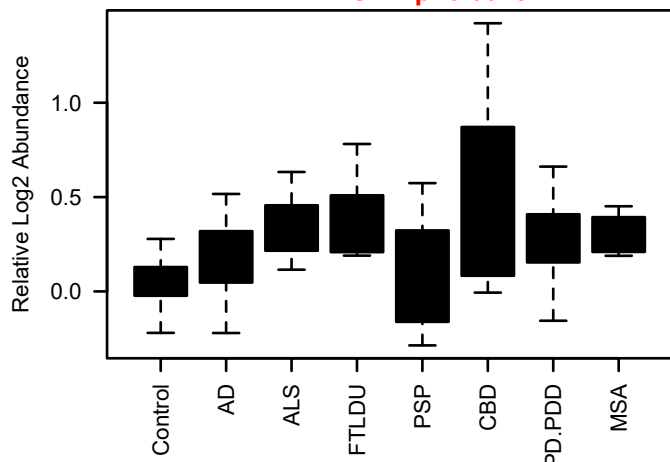

**RPL18A UPenn Mixed PRM**  
**K-W ANOVA p: 0.15**

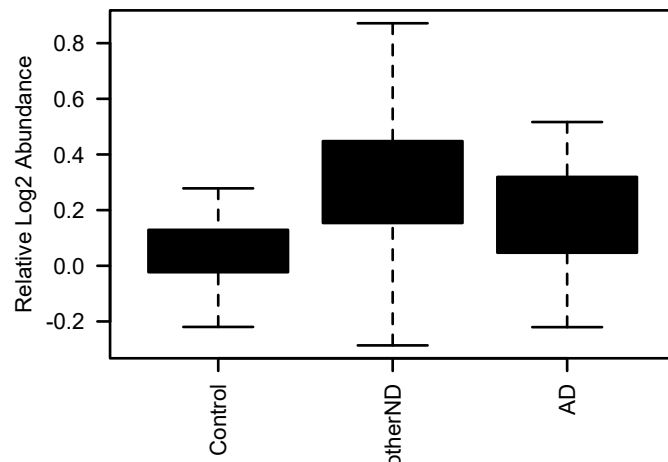

**bicor=0.016, p=0.89**  
**cor=0.031, p=0.78**

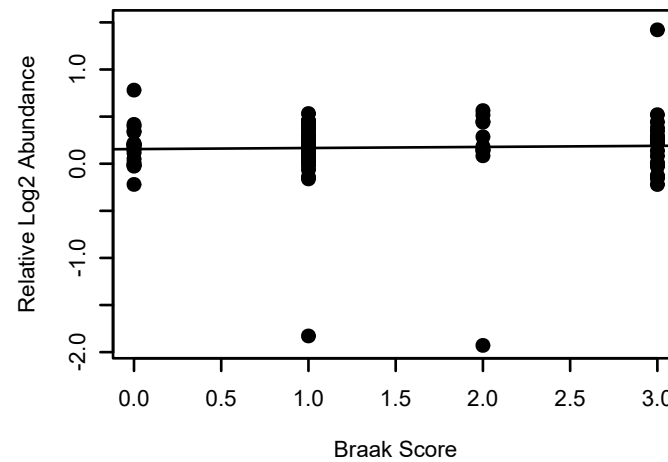

**bicor=0.033, p=0.74**  
**cor=-0.024, p=0.81**

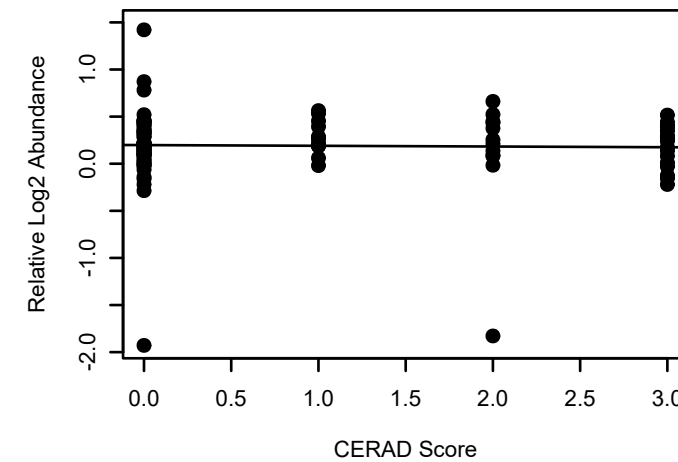

**RAB27B UPenn Mixed PRM**  
**NA grey MEGA module member**  
**K-W ANOVA p: 0.011**

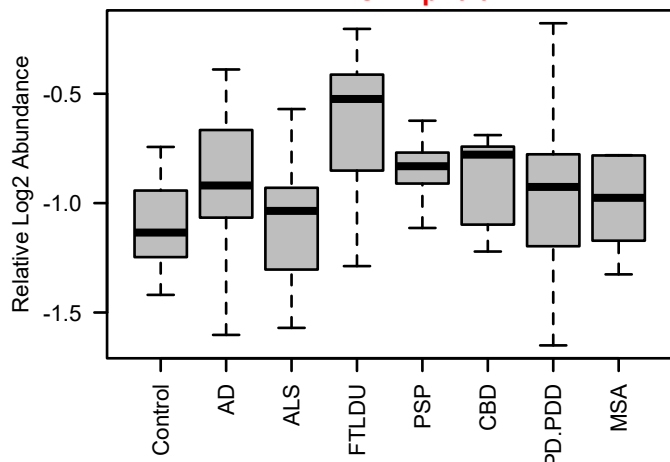

**RAB27B UPenn Mixed PRM**  
**K-W ANOVA p: 0.16**

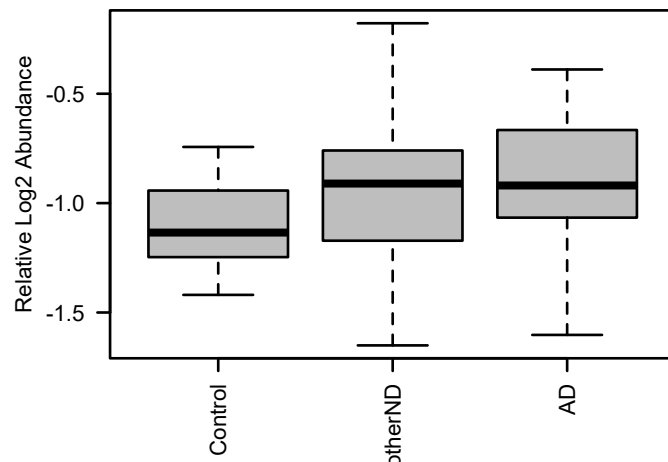

**bicor=0.1, p=0.37**  
**cor=0.1, p=0.37**

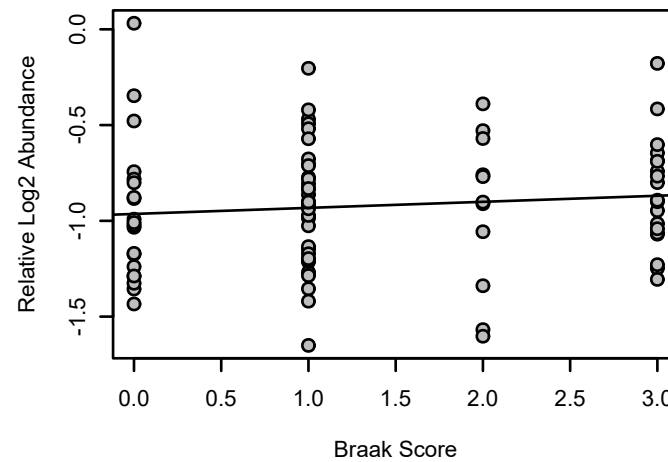

**bicor=0.16, p=0.11**  
**cor=0.17, p=0.091**

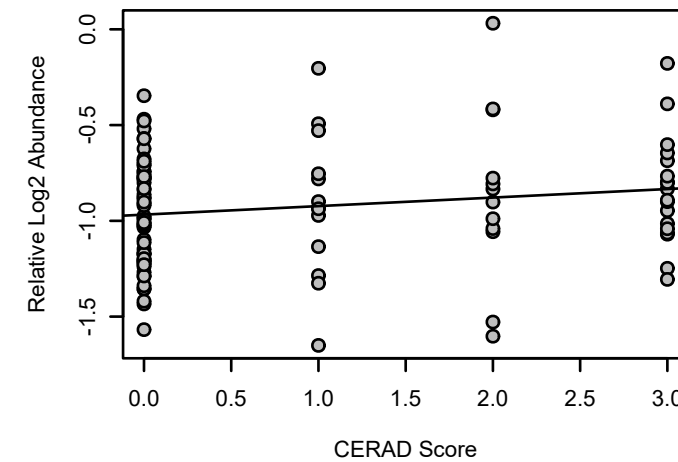

**PDHX UPenn Mixed PRM**  
**M3 brown MEGA module member**  
**K-W ANOVA p: 0.41**

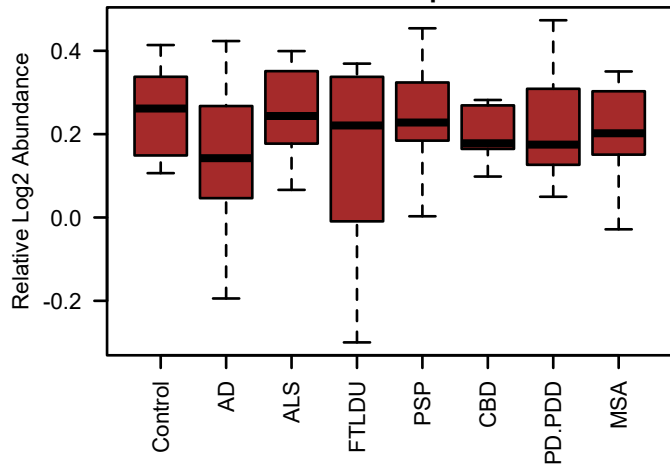

**PDHX UPenn Mixed PRM**  
**K-W ANOVA p: 0.15**

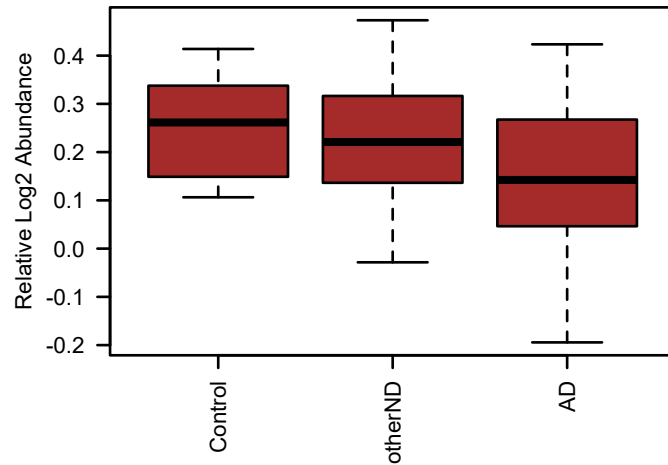

**bicor=-0.17, p=0.11**  
**cor=-0.17, p=0.12**

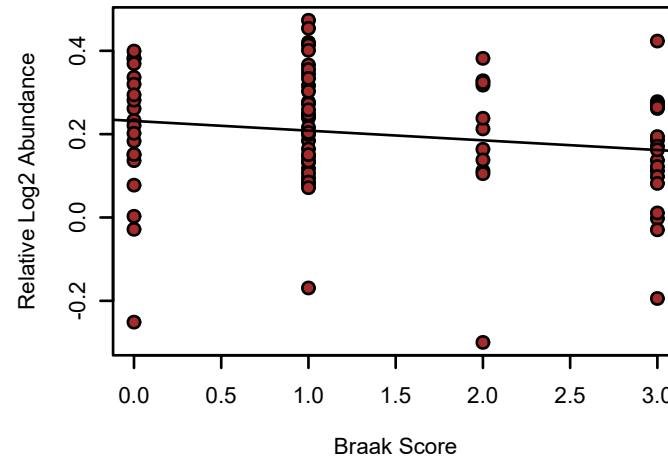

**bicor=-0.24, p=0.015**  
**cor=-0.2, p=0.046**

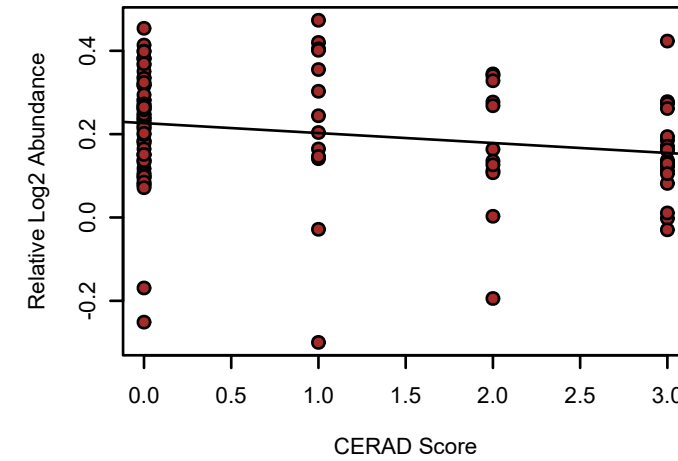

**IPO5 UPenn Mixed PRM**  
**M12 tan MEGA module member**  
**K-W ANOVA p: 0.24**

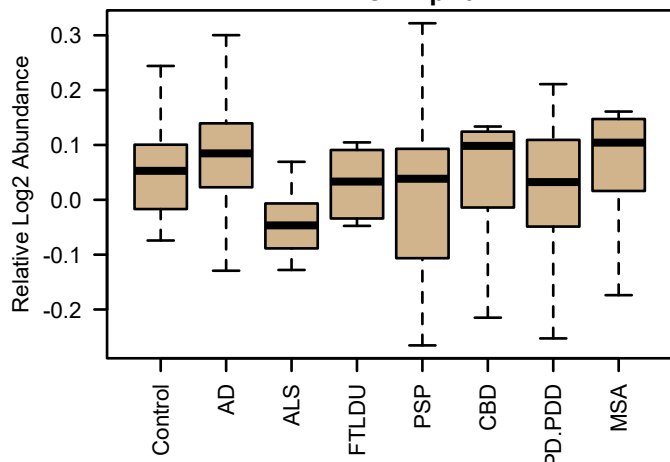

**IPO5 UPenn Mixed PRM**  
**K-W ANOVA p: 0.083**

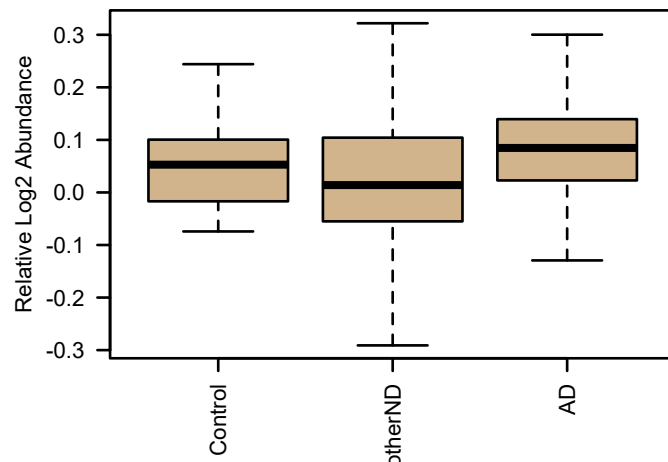

**bicor=0.22, p=0.044**  
**cor=0.29, p=0.0075**

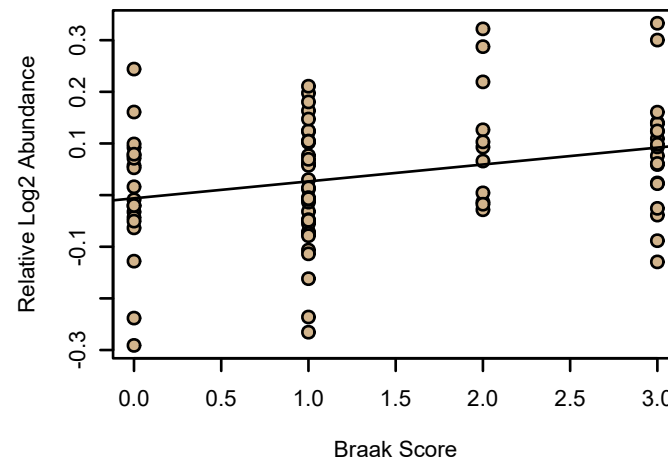

**bicor=0.12, p=0.22**  
**cor=0.13, p=0.2**

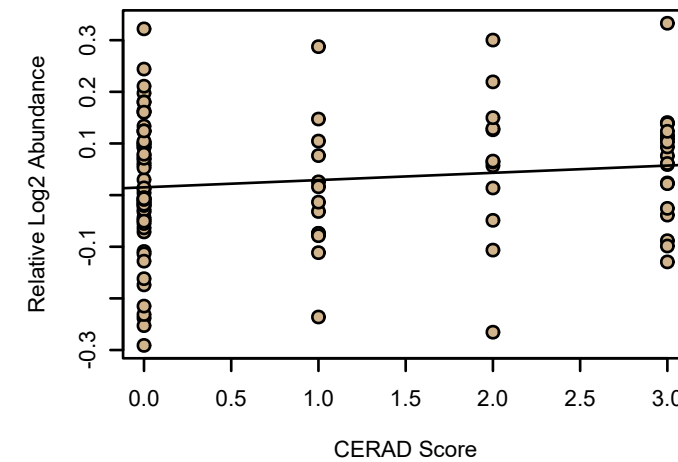

**AP3D1 UPenn Mixed PRM**  
**M1 turquoise MEGA module member**  
**K-W ANOVA p: 0.0092**

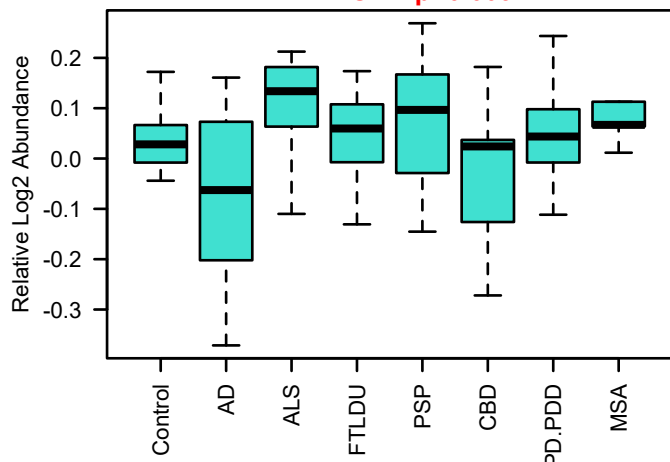

**AP3D1 UPenn Mixed PRM**  
**K-W ANOVA p: 0.0018**

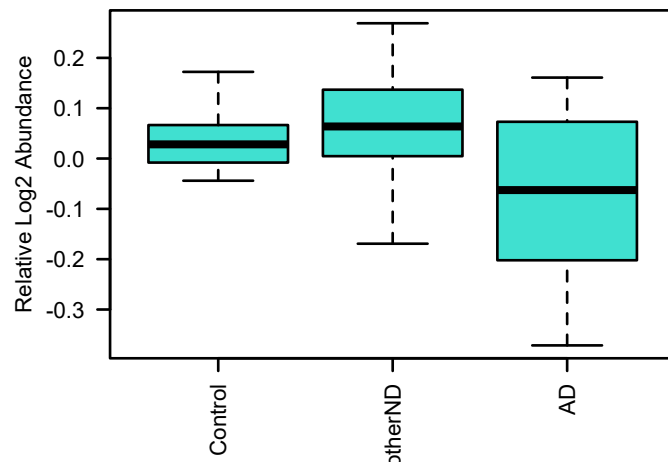

**bicor=-0.26, p=0.019**  
**cor=-0.31, p=0.0041**

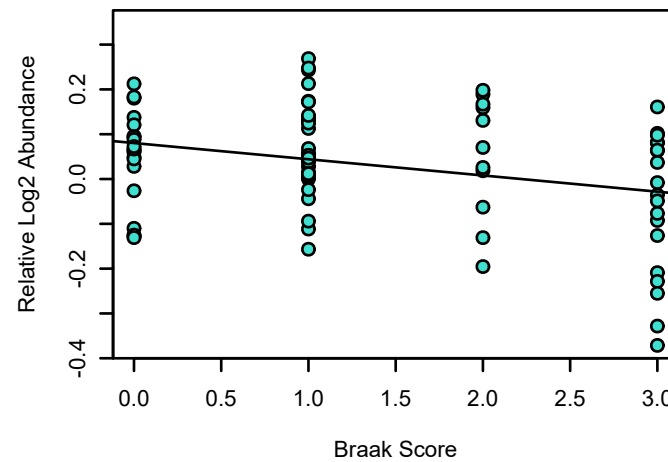

**bicor=-0.21, p=0.036**  
**cor=-0.21, p=0.036**

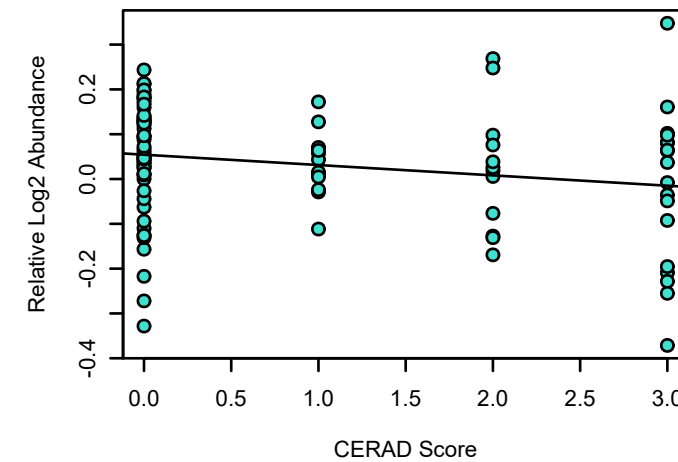

**GNB5 UPenn Mixed PRM**  
**M1 turquoise MEGA module member**  
**K-W ANOVA p: 2.4e-06**

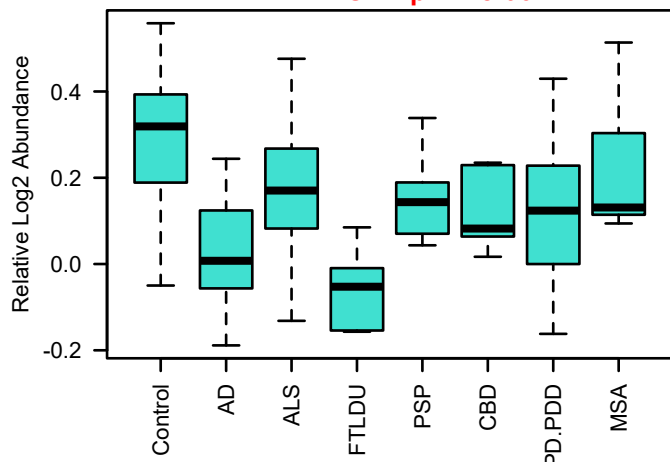

**GNB5 UPenn Mixed PRM**  
**K-W ANOVA p: 5.5e-05**

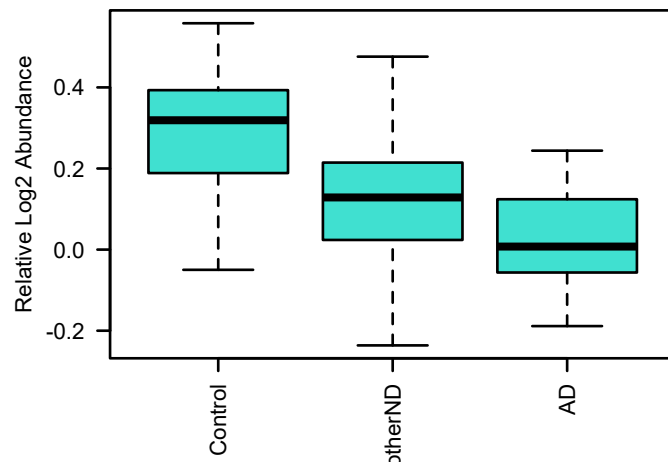

**bicor=-0.32, p=0.0032**  
**cor=-0.31, p=0.0041**

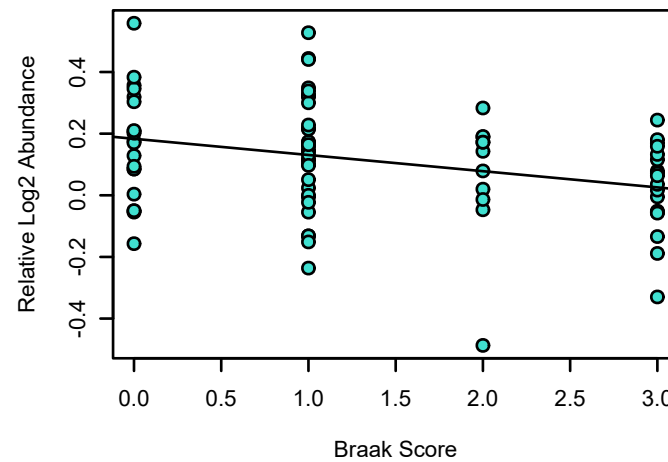

**bicor=-0.3, p=0.0028**  
**cor=-0.29, p=0.0034**

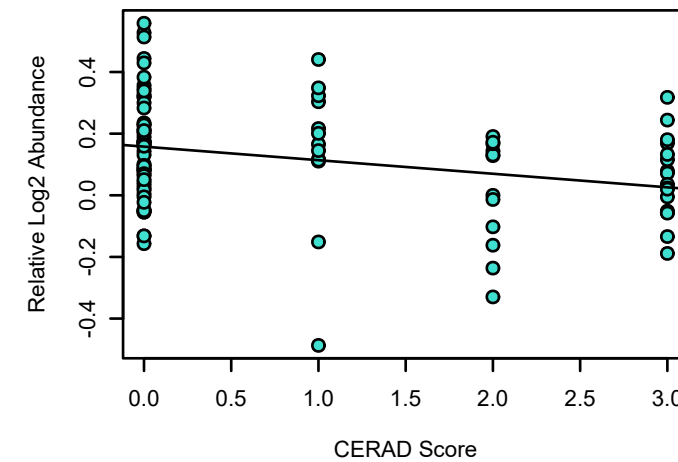

**MGST3 UPenn Mixed PRM**  
M12 tan MEGA module member  
K-W ANOVA p: 3.3e-05

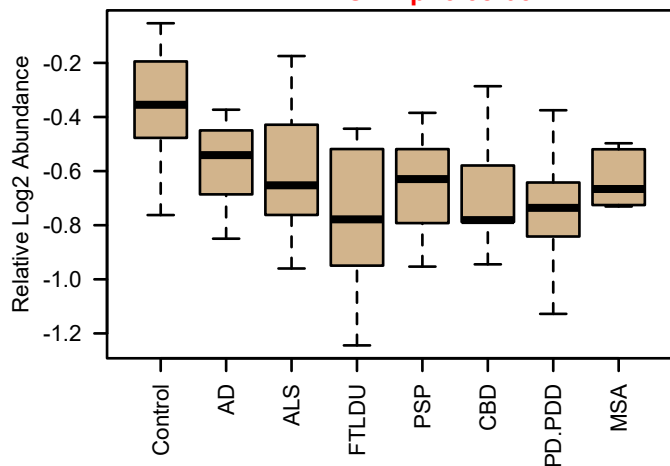

**MGST3 UPenn Mixed PRM**  
K-W ANOVA p: 1.2e-06

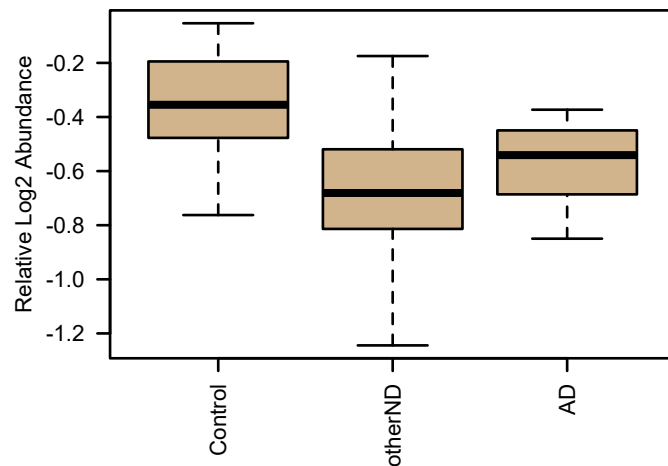

**bicor=-0.12, p=0.26**  
**cor=-0.13, p=0.24**

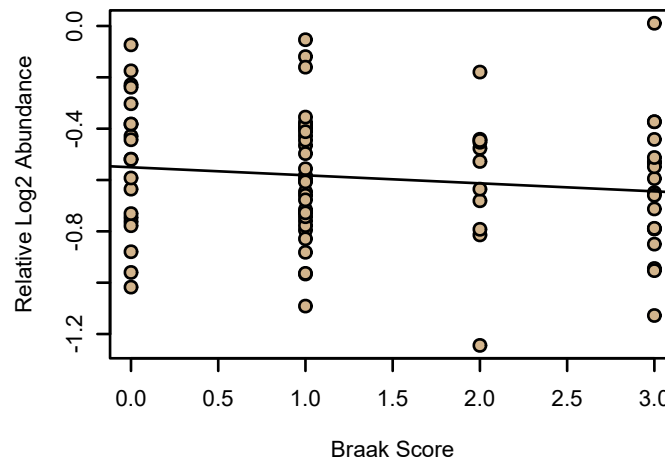

**bicor=-0.023, p=0.82**  
**cor=-0.026, p=0.8**

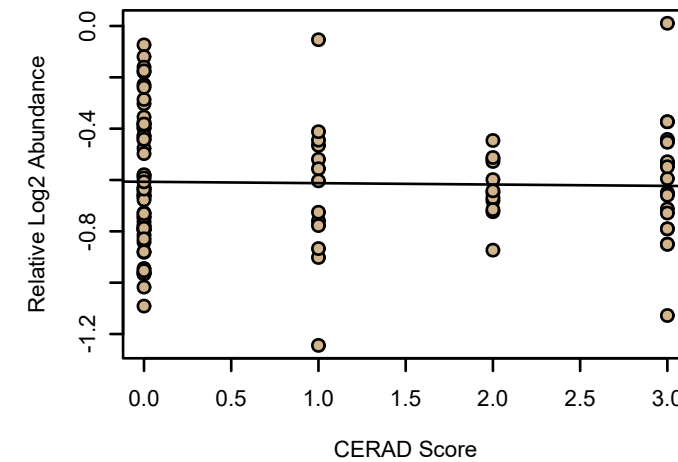

**LIN7A UPenn Mixed PRM**  
M1 turquoise MEGA module member  
K-W ANOVA p: 0.24

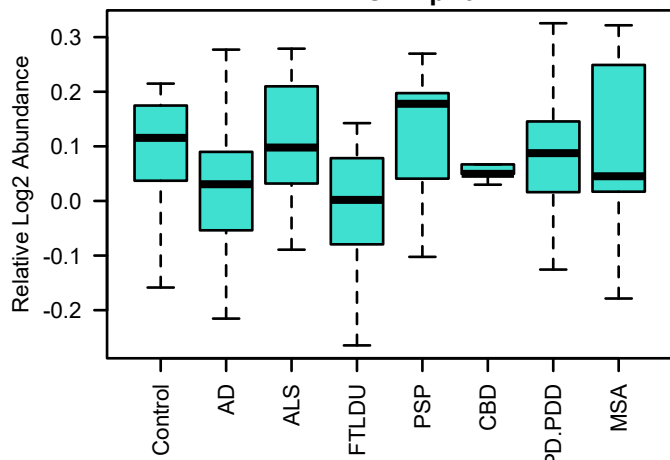

**LIN7A UPenn Mixed PRM**  
K-W ANOVA p: 0.2

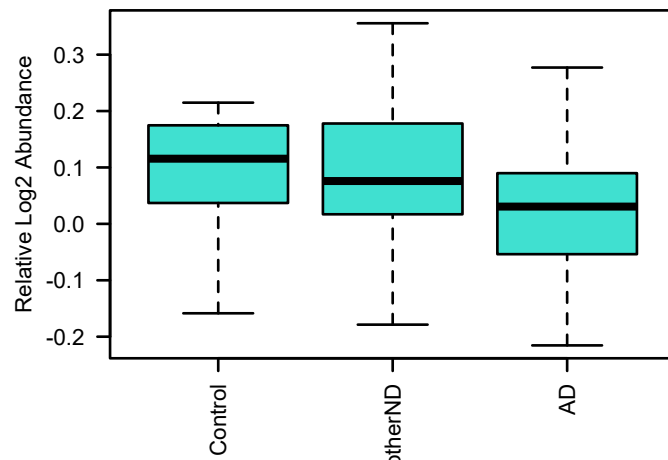

**bicor=-0.069, p=0.53**  
**cor=-0.082, p=0.46**

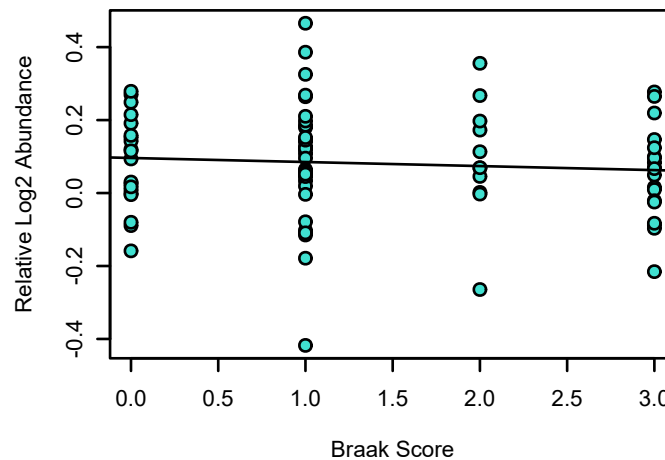

**bicor=-0.097, p=0.34**  
**cor=-0.074, p=0.46**

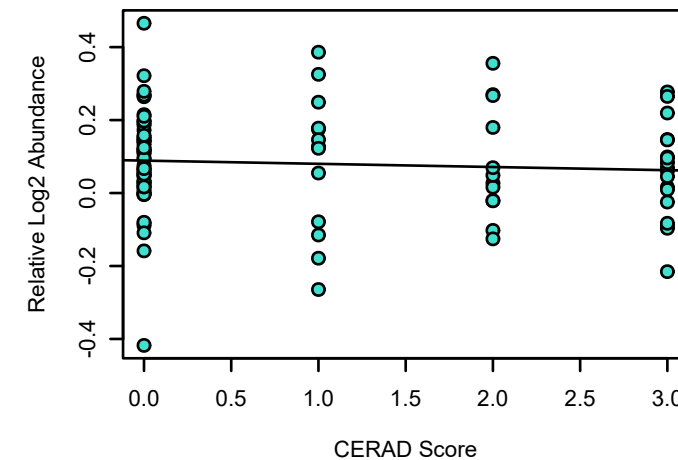

**SPTBN2 UPenn Mixed PRM**  
M1 turquoise MEGA module member  
K-W ANOVA p: 0.26

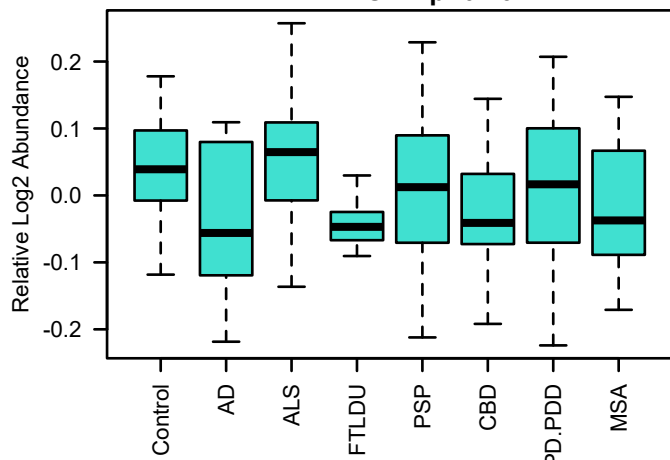

**SPTBN2 UPenn Mixed PRM**  
K-W ANOVA p: 0.15

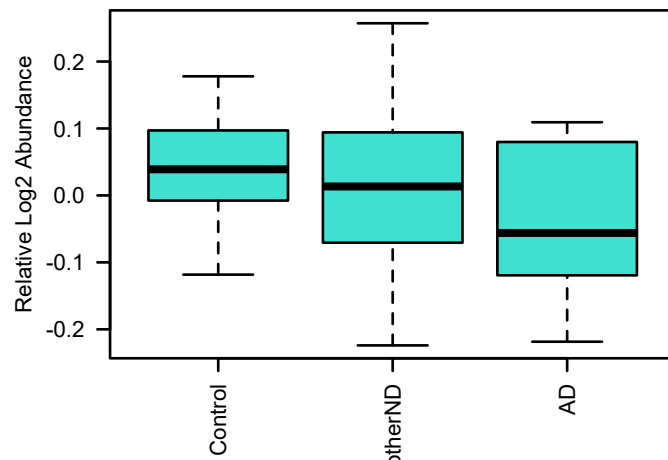

**bicor=-0.16, p=0.16**  
**cor=-0.18, p=0.1**

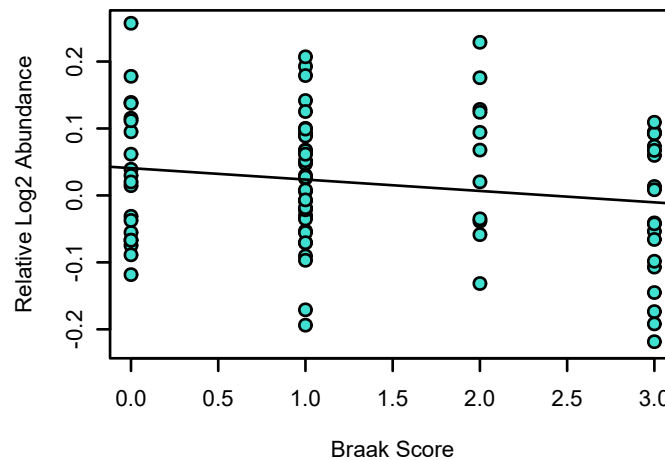

**bicor=-0.18, p=0.068**  
**cor=-0.19, p=0.058**

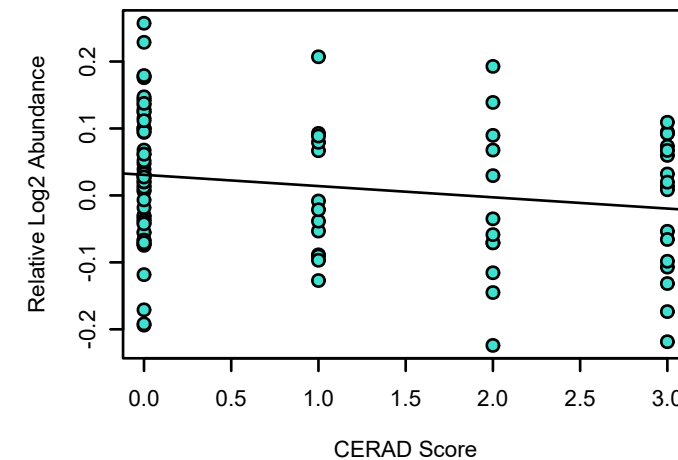

**DCLK1 UPenn Mixed PRM**  
M1 turquoise MEGA module member  
K-W ANOVA p: 0.0017

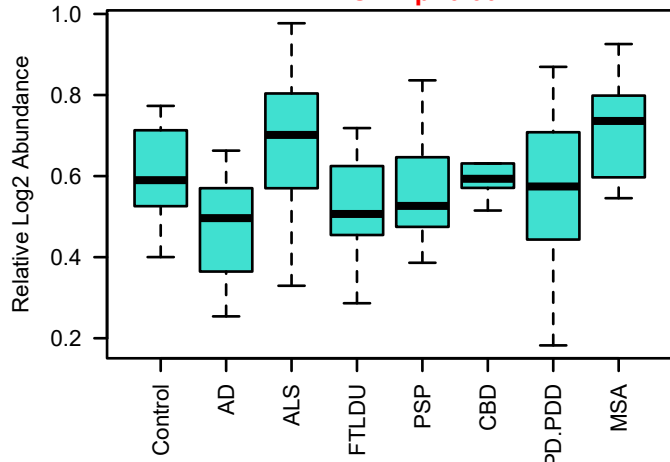

**DCLK1 UPenn Mixed PRM**  
K-W ANOVA p: 0.0099

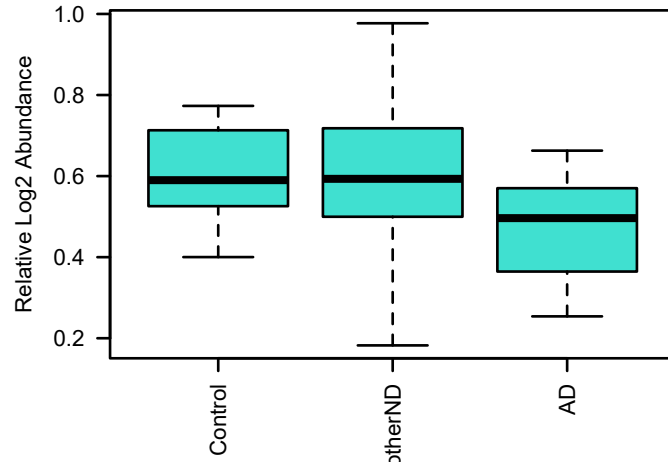

**bicor=-0.25, p=0.021**  
**cor=-0.28, p=0.0099**

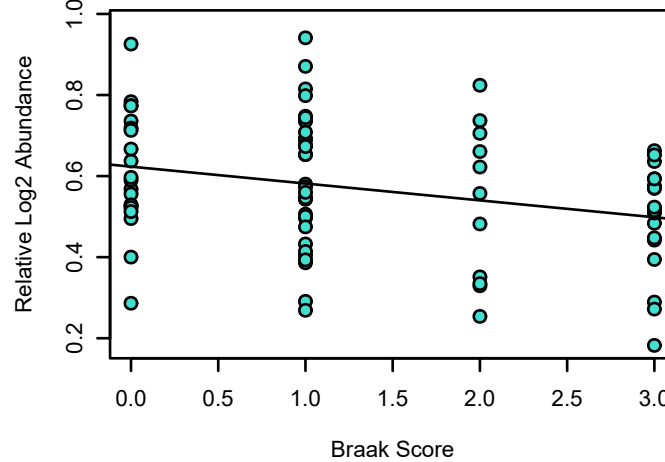

**bicor=-0.29, p=0.003**  
**cor=-0.3, p=0.0024**

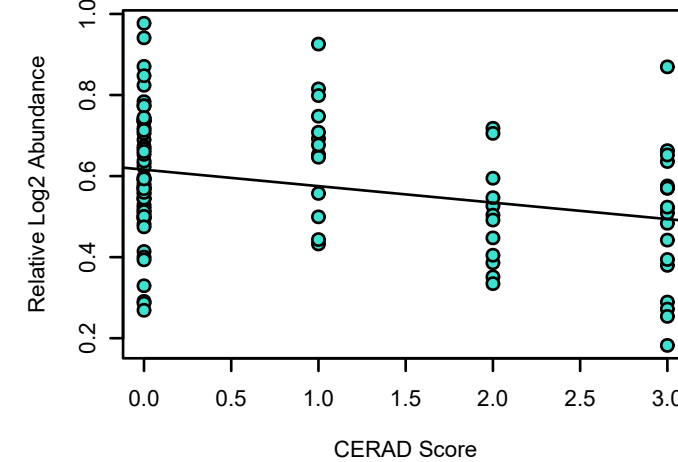



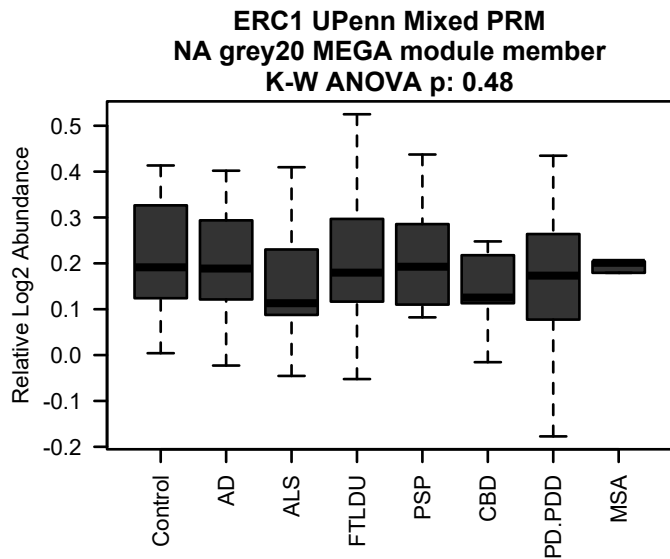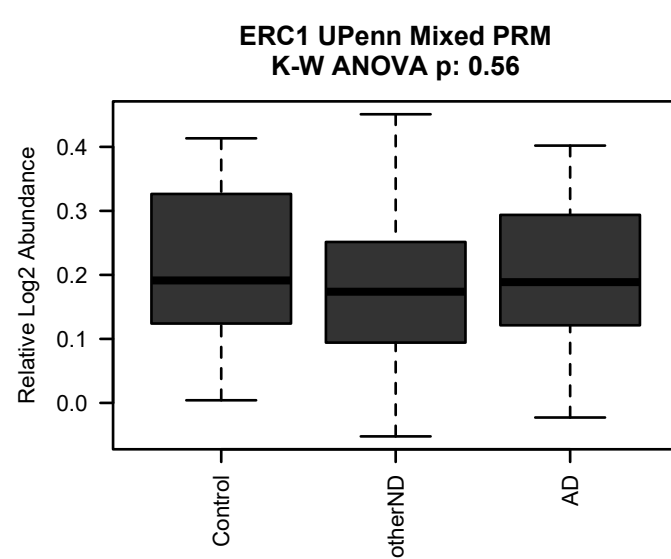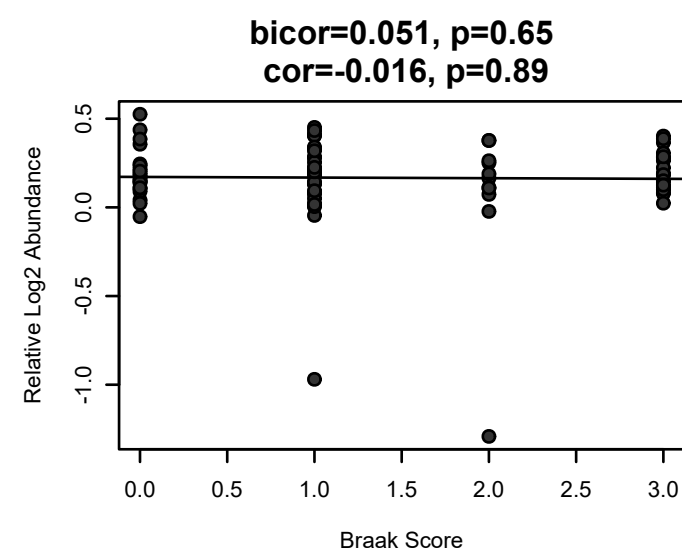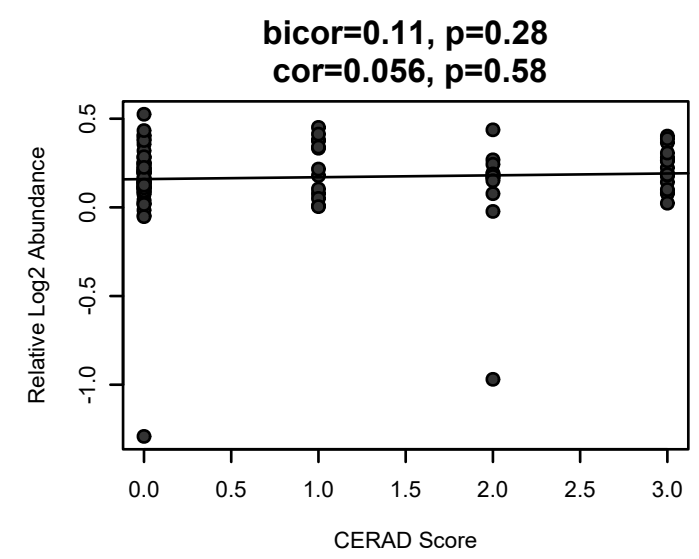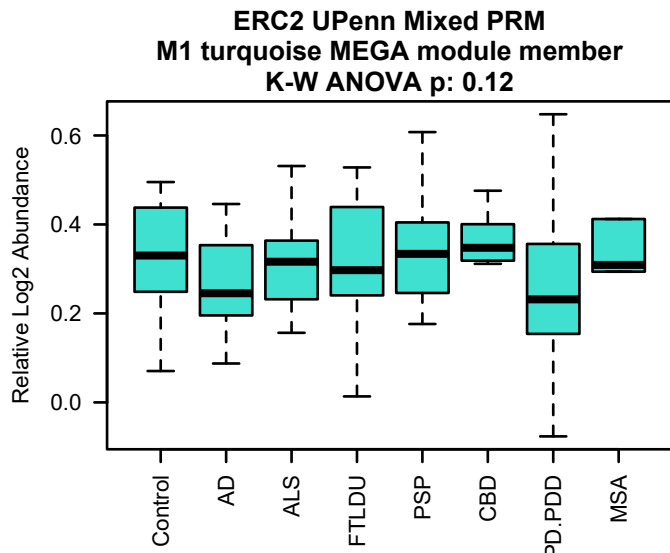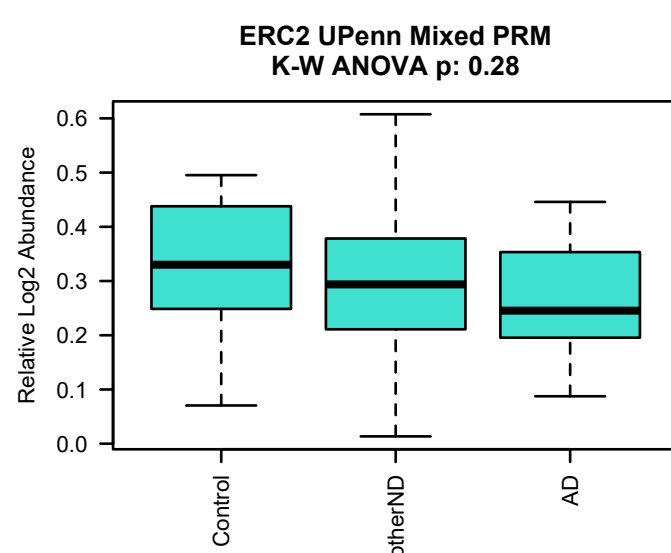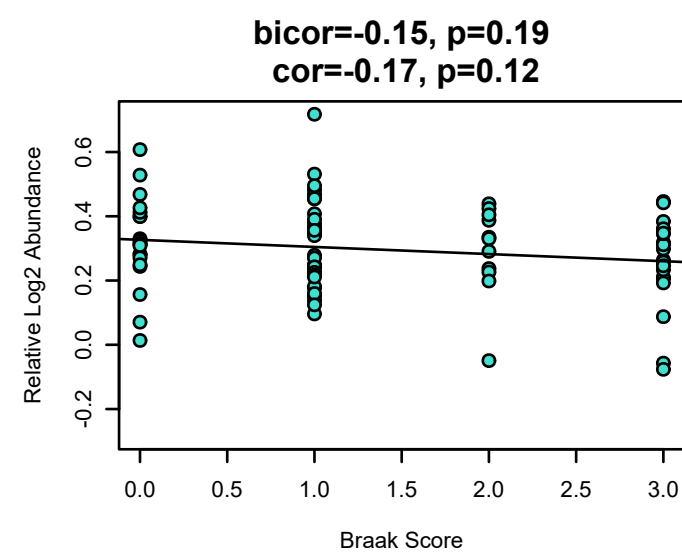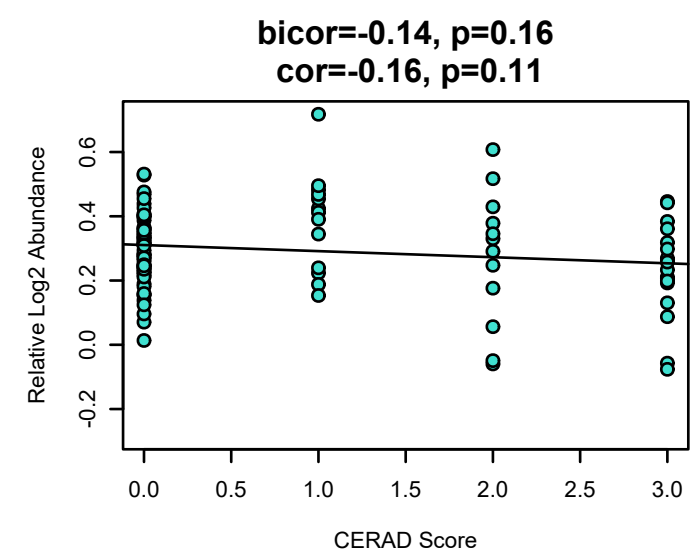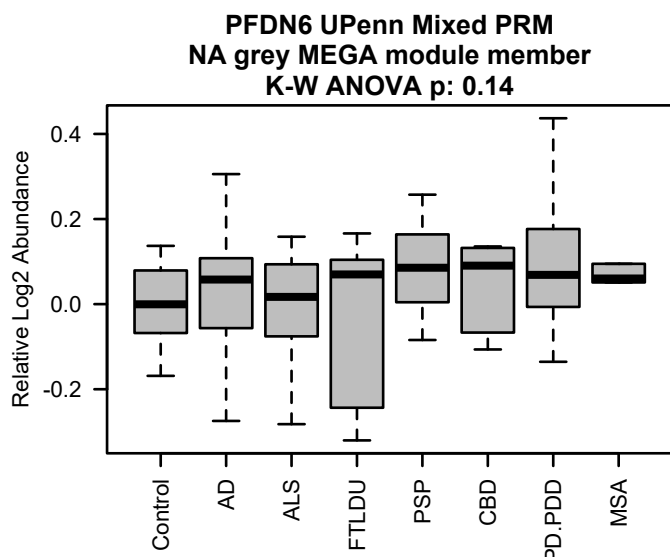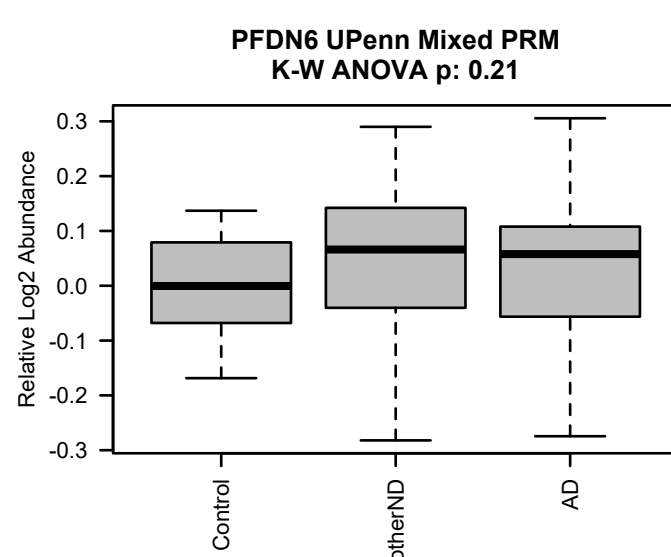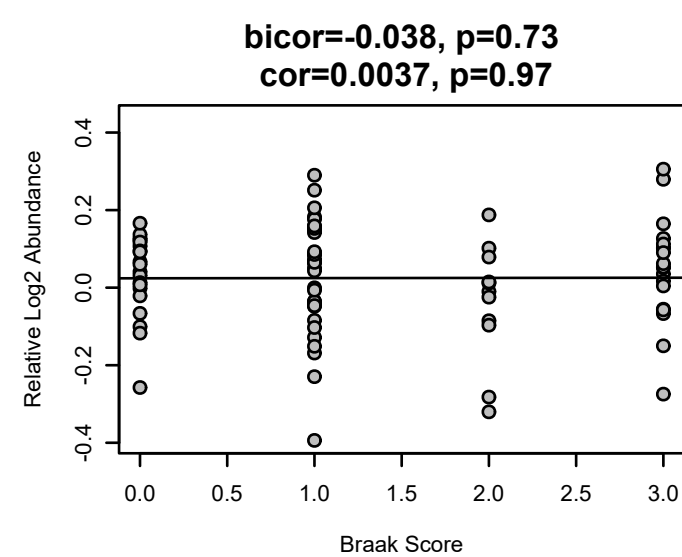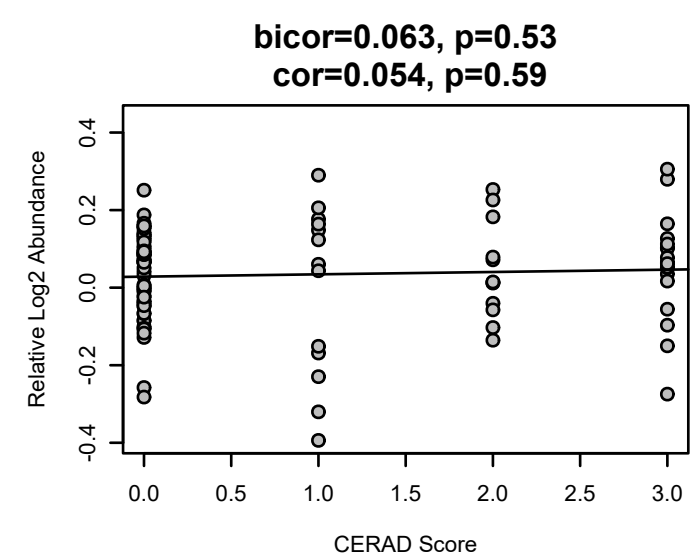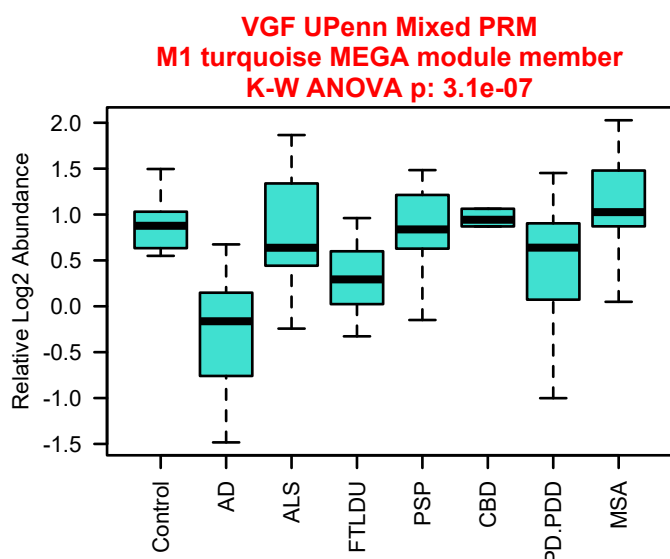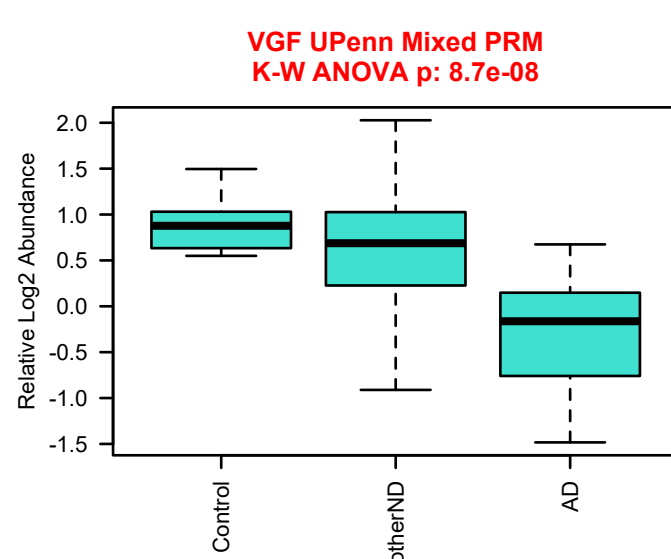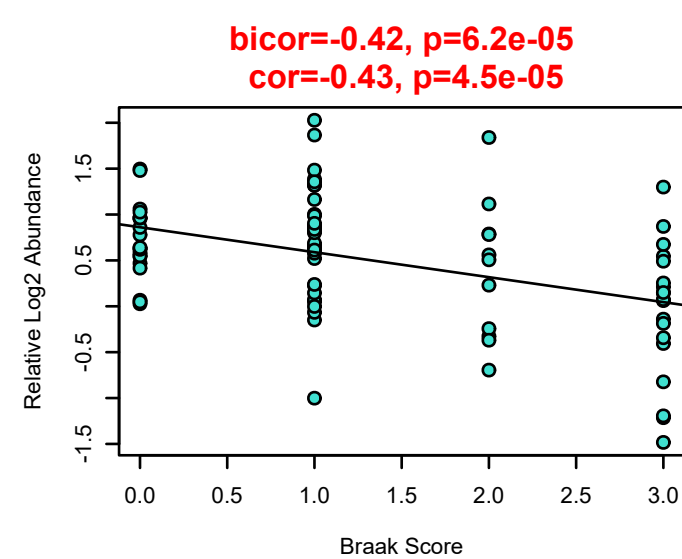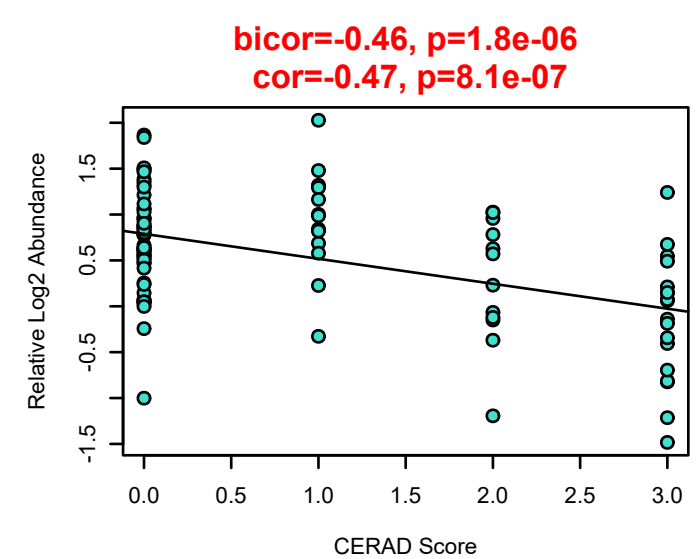

**OGT UPenn Mixed PRM**  
**M1 turquoise MEGA module member**  
**K-W ANOVA p: 0.92**

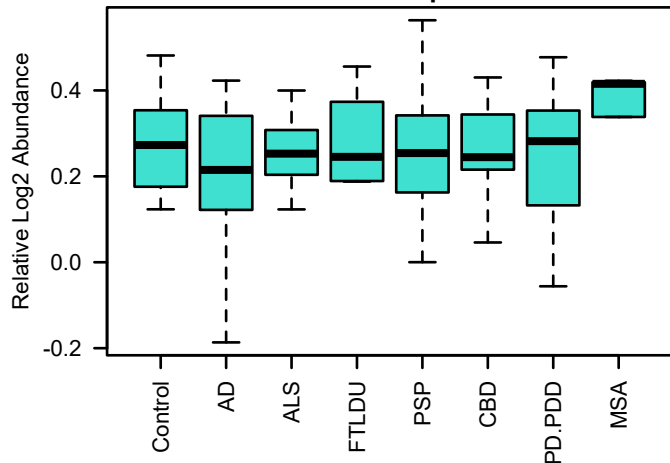

**OGT UPenn Mixed PRM**  
**K-W ANOVA p: 0.52**

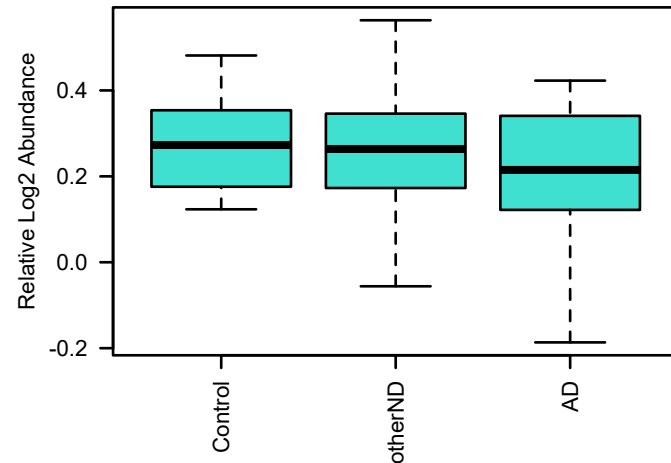

**bicor=-0.17, p=0.13**  
**cor=-0.2, p=0.068**

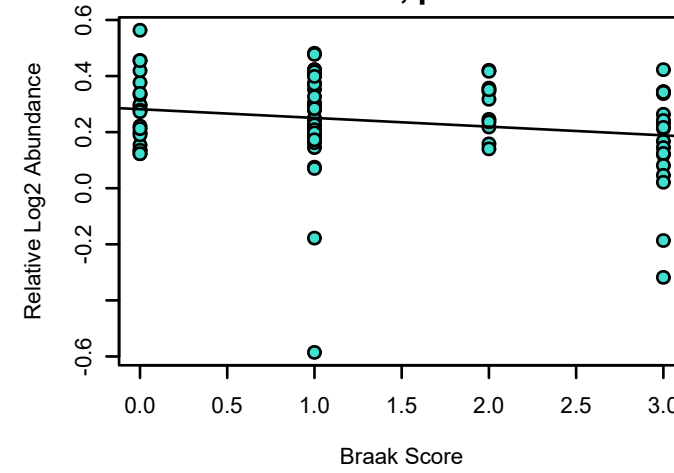

**bicor=-0.16, p=0.12**  
**cor=-0.18, p=0.073**

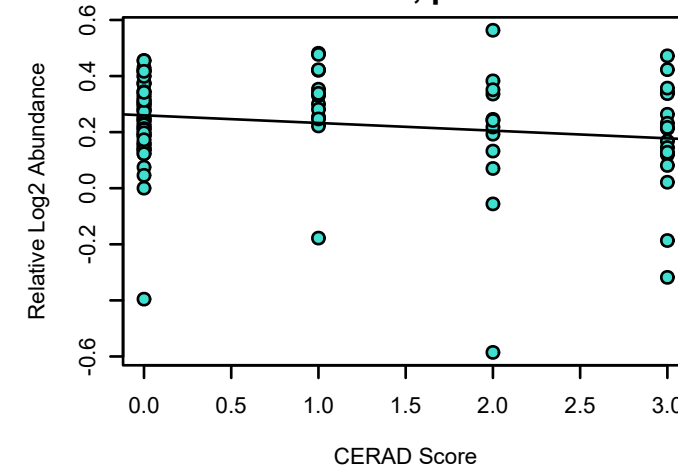

**HNRNPR UPenn Mixed PRM**  
**M10 purple MEGA module member**  
**K-W ANOVA p: 0.0049**

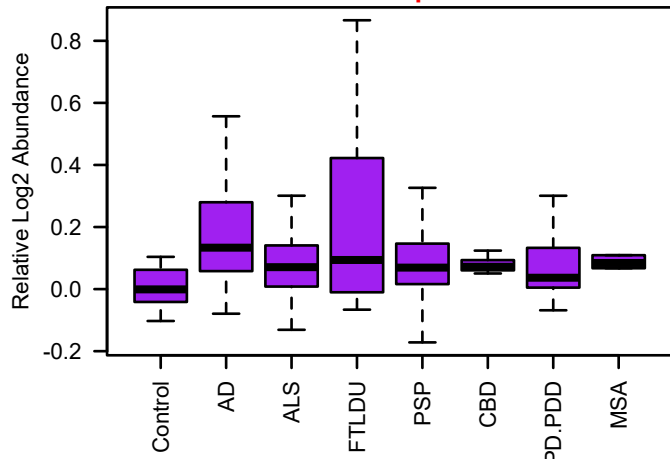

**HNRNPR UPenn Mixed PRM**  
**K-W ANOVA p: 0.0024**

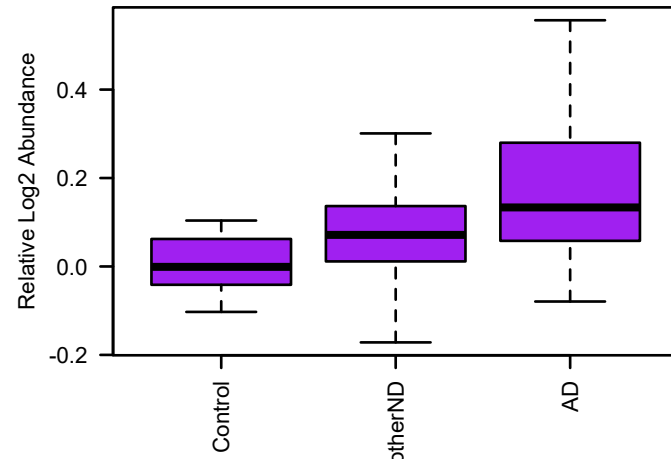

**bicor=0.26, p=0.016**  
**cor=0.28, p=0.0099**

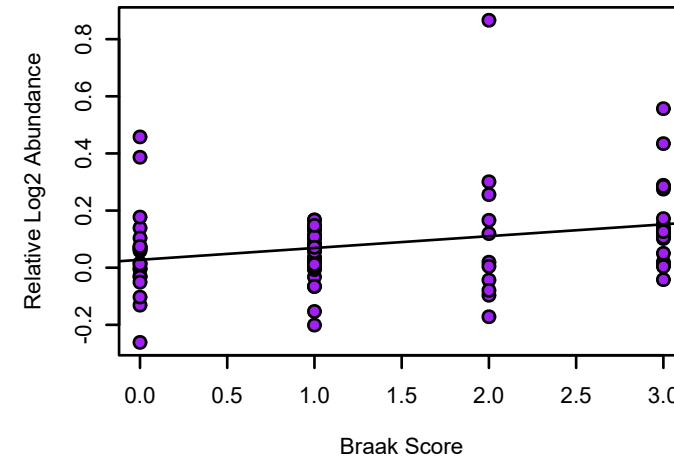

**bicor=0.28, p=0.0049**  
**cor=0.26, p=0.009**

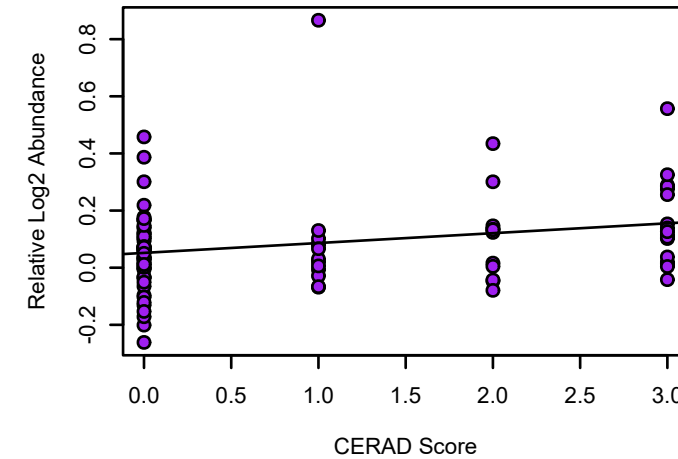

**NDUFS5 UPenn Mixed PRM**  
**M3 brown MEGA module member**  
**K-W ANOVA p: 0.0011**

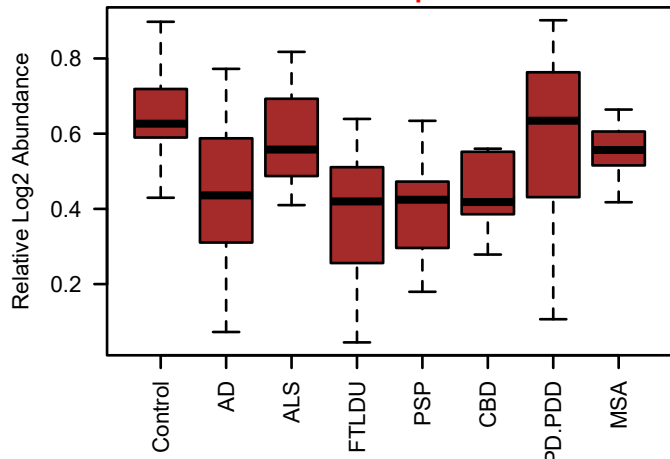

**NDUFS5 UPenn Mixed PRM**  
**K-W ANOVA p: 0.041**

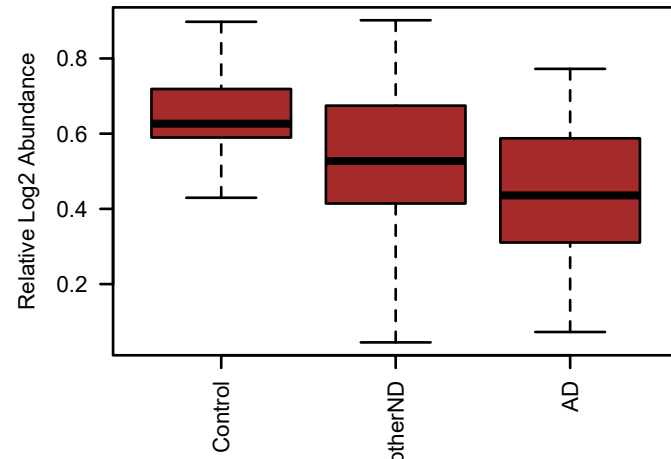

**bicor=-0.25, p=0.02**  
**cor=-0.24, p=0.028**

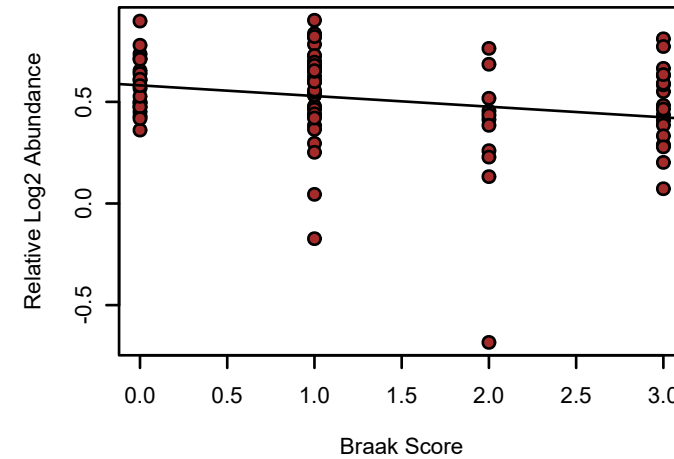

**bicor=-0.2, p=0.049**  
**cor=-0.14, p=0.16**

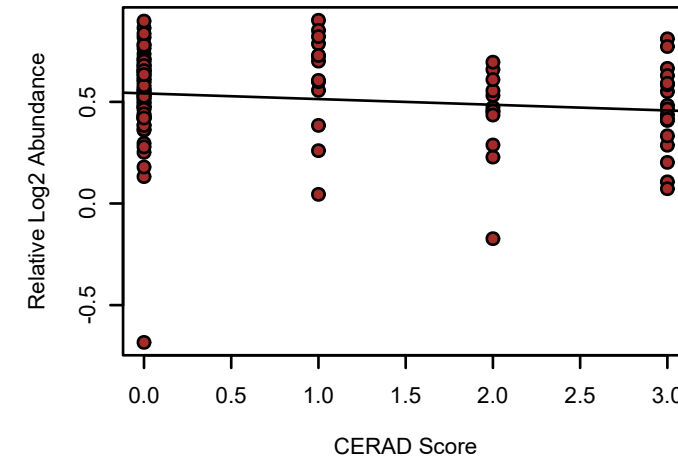

**OPA1 UPenn Mixed PRM**  
**M3 brown MEGA module member**  
**K-W ANOVA p: 0.17**

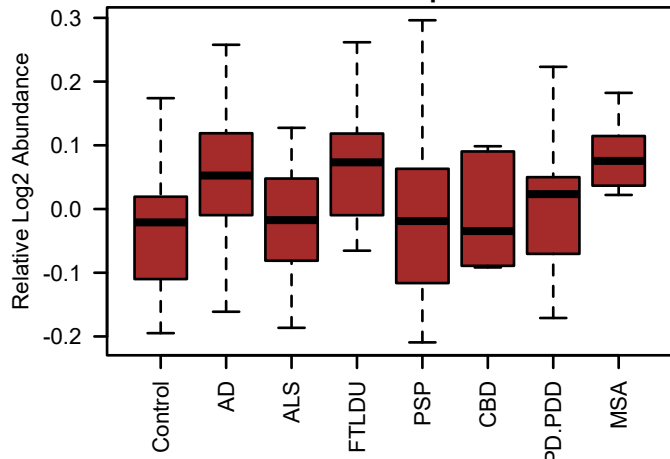

**OPA1 UPenn Mixed PRM**  
**K-W ANOVA p: 0.13**

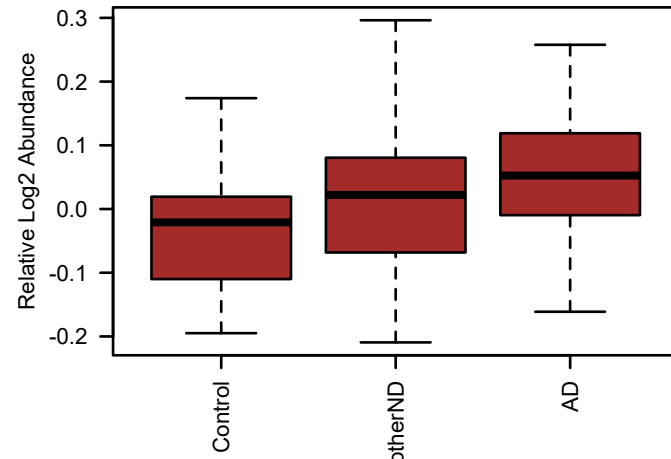

**bicor=0.12, p=0.28**  
**cor=0.14, p=0.2**

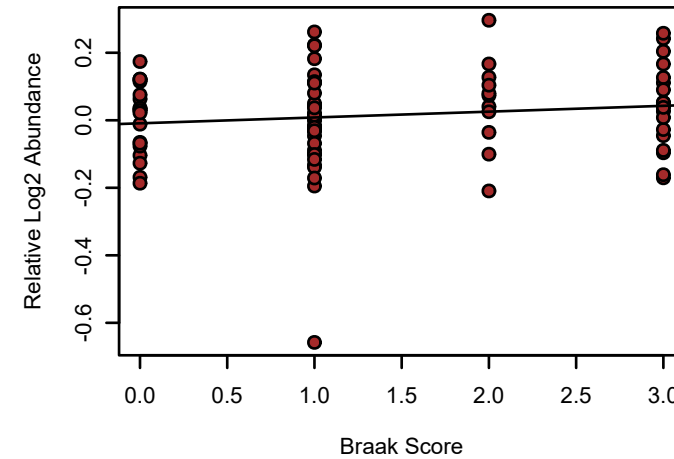

**bicor=0.081, p=0.42**  
**cor=0.023, p=0.82**

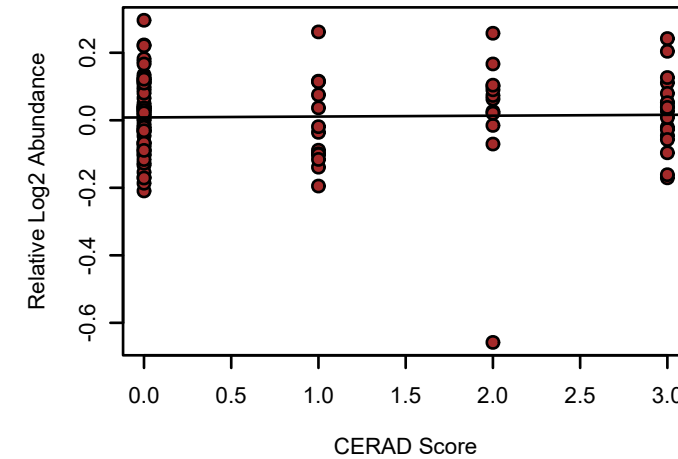

**DNAJC6 UPenn Mixed PRM**  
M1 turquoise MEGA module member  
K-W ANOVA p: 0.0021

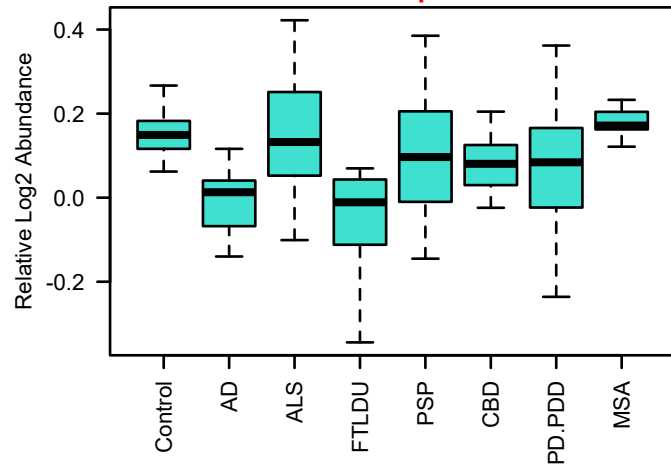

**DNAJC6 UPenn Mixed PRM**  
K-W ANOVA p: 0.0045

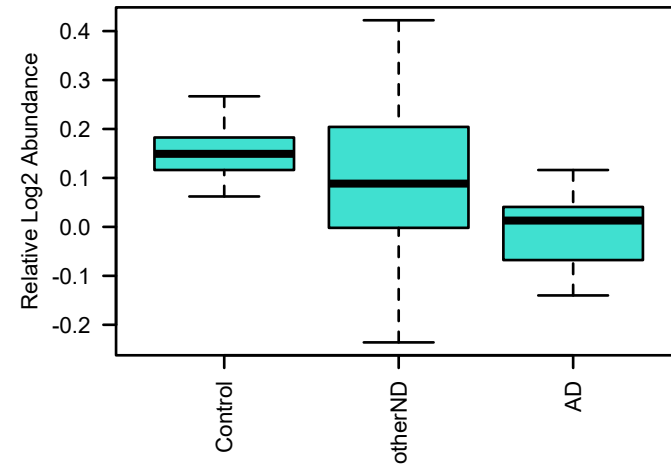

**bicor=-0.35, p=0.00098**  
**cor=-0.36, p=0.00077**

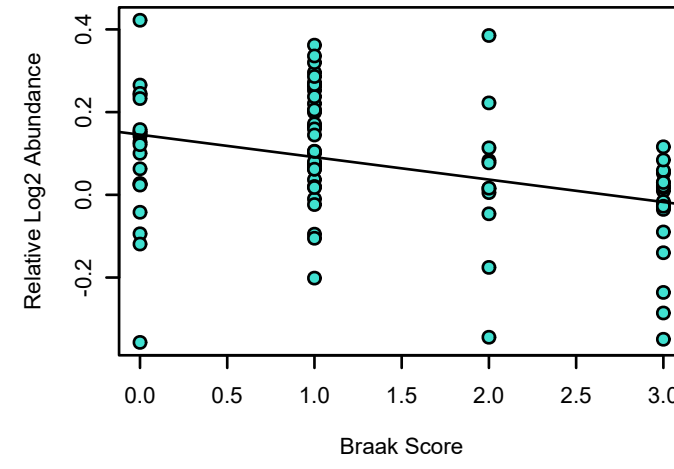

**bicor=-0.37, p=0.00014**  
**cor=-0.35, p=0.00036**

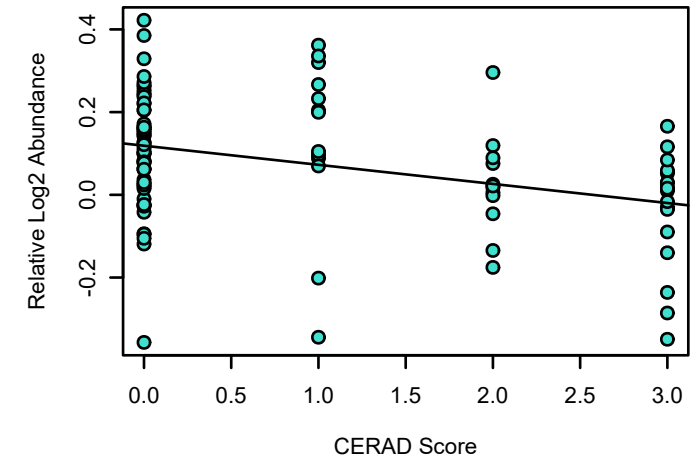

**WDR1 UPenn Mixed PRM**  
NA grey MEGA module member  
K-W ANOVA p: 0.00014

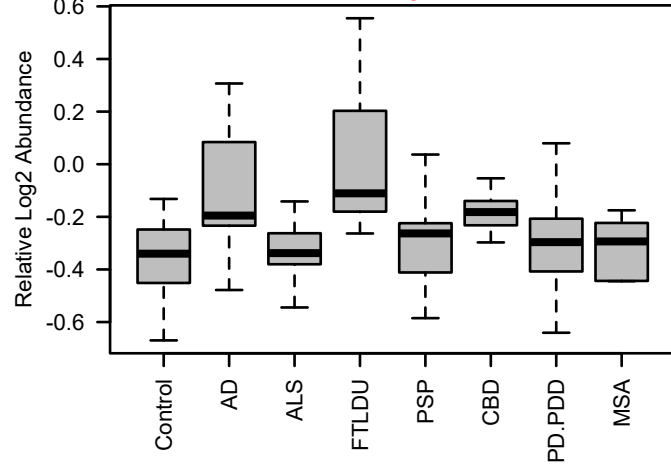

**WDR1 UPenn Mixed PRM**  
K-W ANOVA p: 0.0035

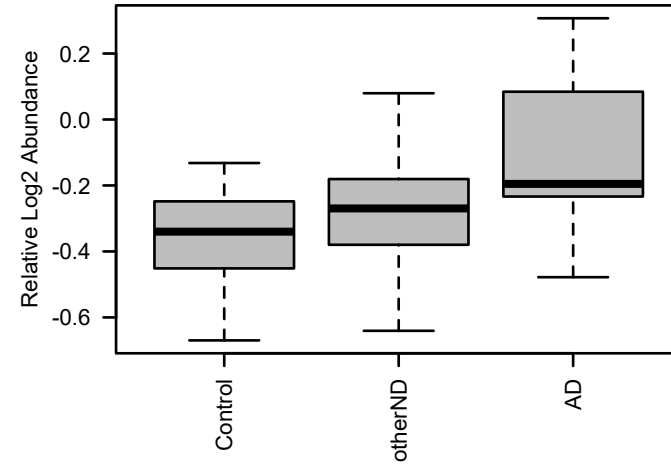

**bicor=0.29, p=0.0071**  
**cor=0.27, p=0.013**

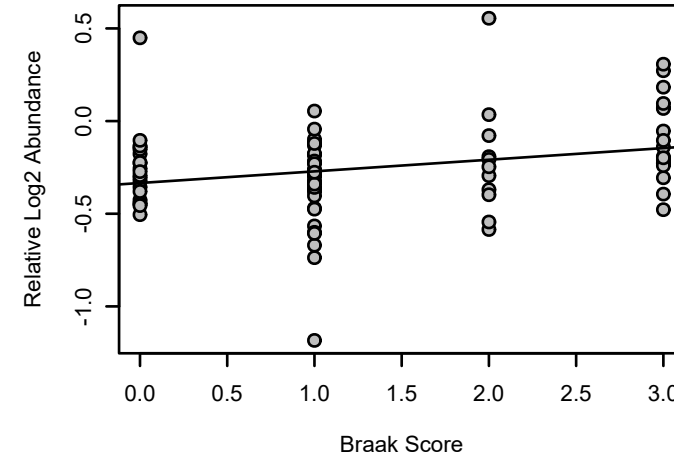

**bicor=0.27, p=0.0074**  
**cor=0.22, p=0.028**

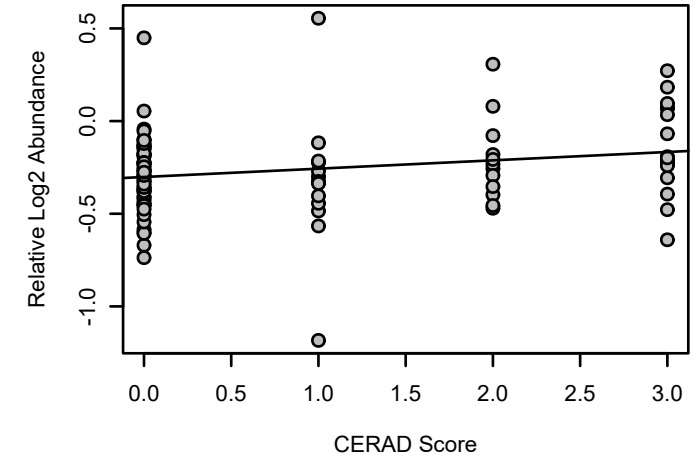

**NDUFS7 UPenn Mixed PRM**  
M3 brown MEGA module member  
K-W ANOVA p: 0.0018

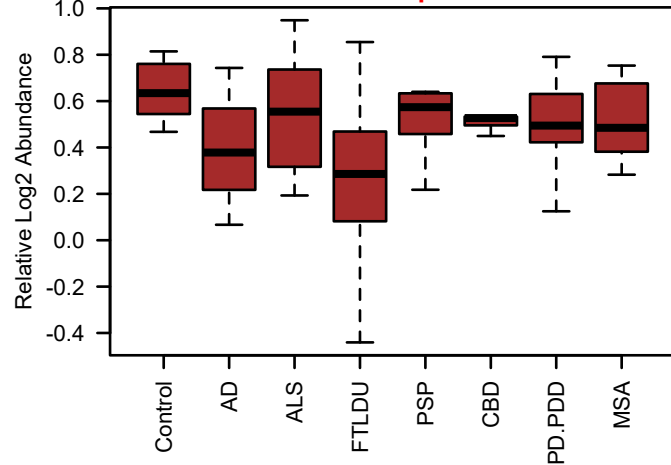

**NDUFS7 UPenn Mixed PRM**  
K-W ANOVA p: 0.0031

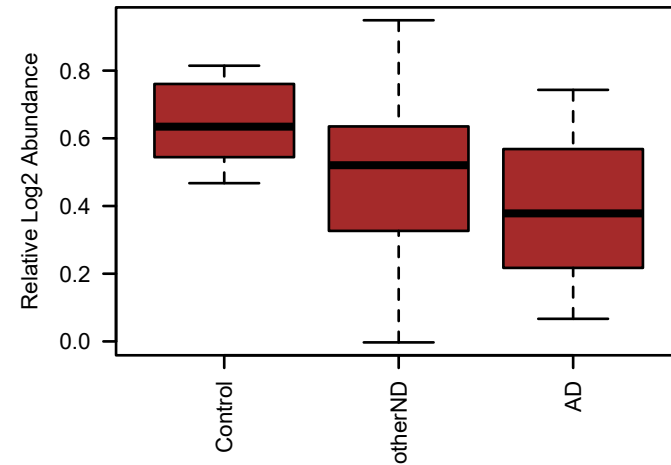

**bicor=-0.3, p=0.0058**  
**cor=-0.29, p=0.0075**

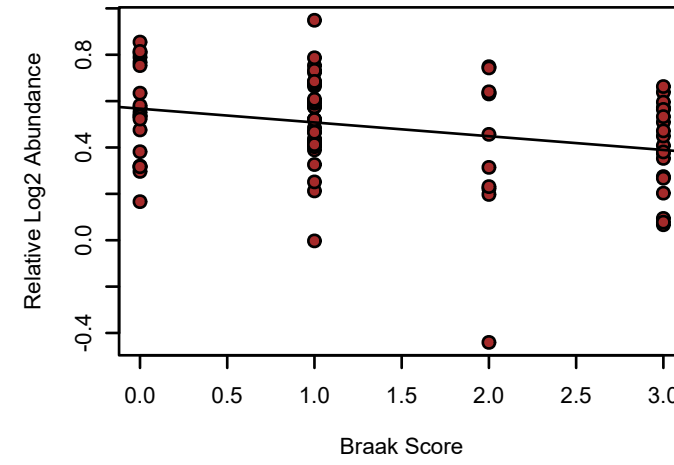

**bicor=-0.28, p=0.005**  
**cor=-0.27, p=0.0066**

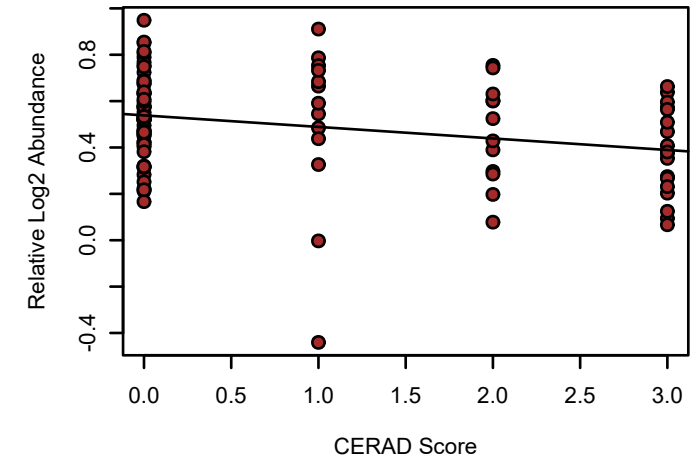

**NDUFS2 UPenn Mixed PRM**  
M3 brown MEGA module member  
K-W ANOVA p: 0.00013

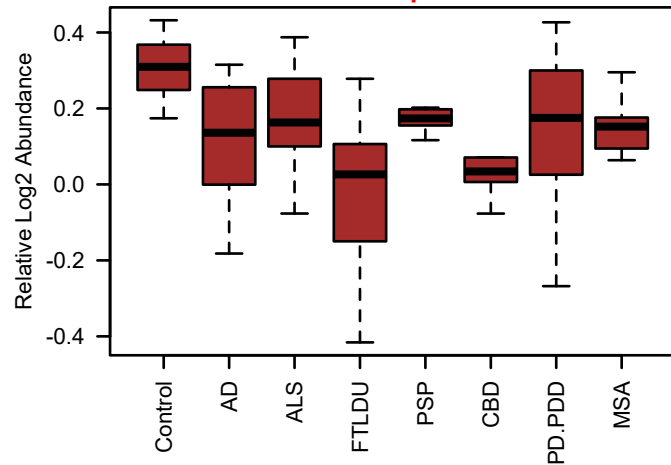

**NDUFS2 UPenn Mixed PRM**  
K-W ANOVA p: 0.00028

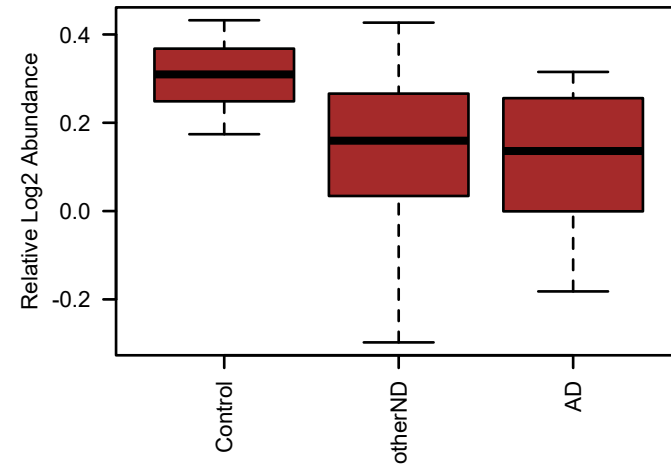

**bicor=-0.28, p=0.01**  
**cor=-0.28, p=0.0099**

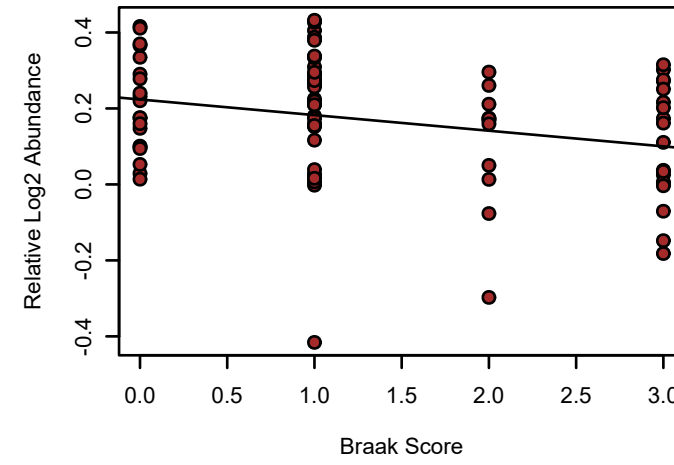

**bicor=-0.22, p=0.027**  
**cor=-0.22, p=0.028**

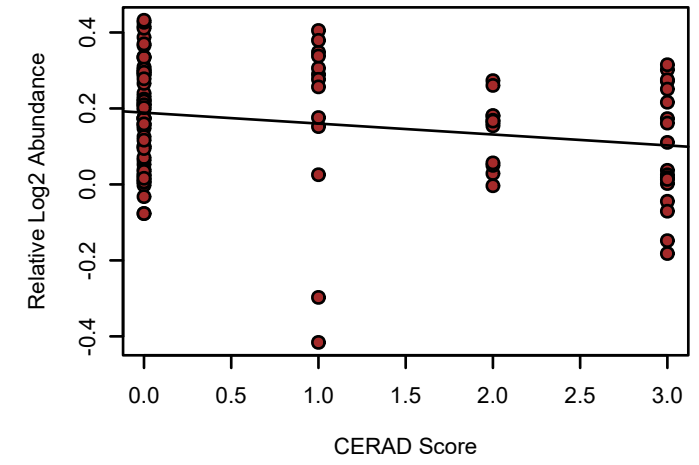



**H2AFY UPenn Mixed PRM**  
**M10 purple MEGA module member**  
**K-W ANOVA p: 4.8e-05**

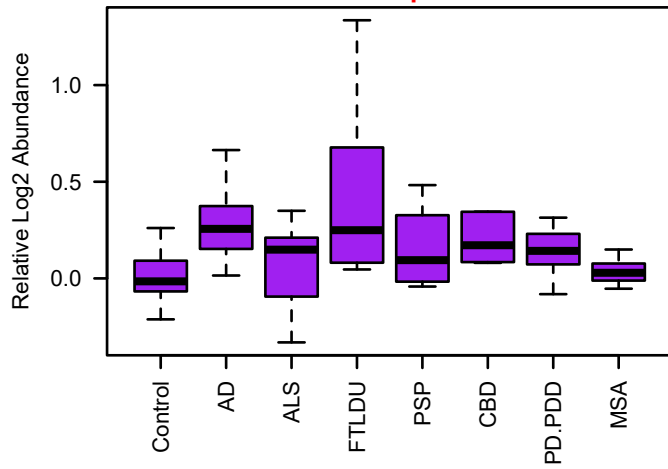

**H2AFY UPenn Mixed PRM**  
**K-W ANOVA p: 0.00093**

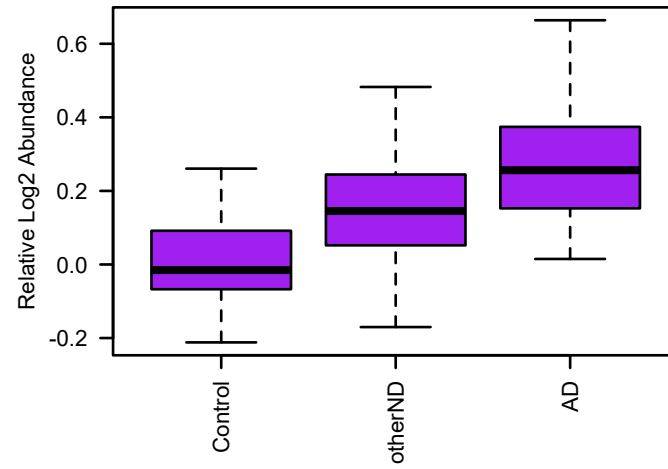

**bicor=0.41, p=0.00012**  
**cor=0.34, p=0.0016**

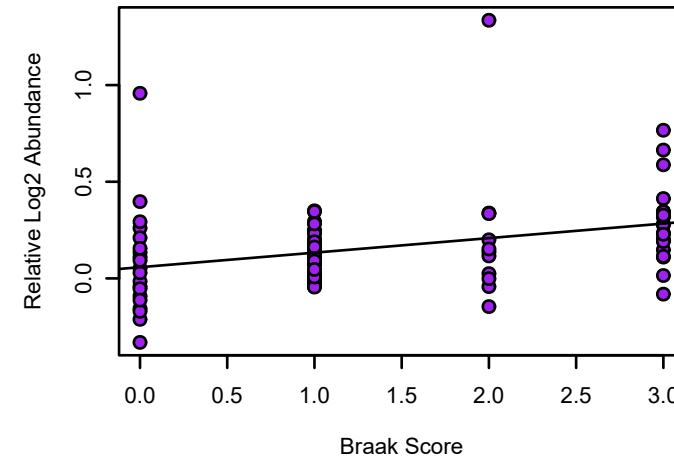

**bicor=0.26, p=0.0081**  
**cor=0.22, p=0.028**

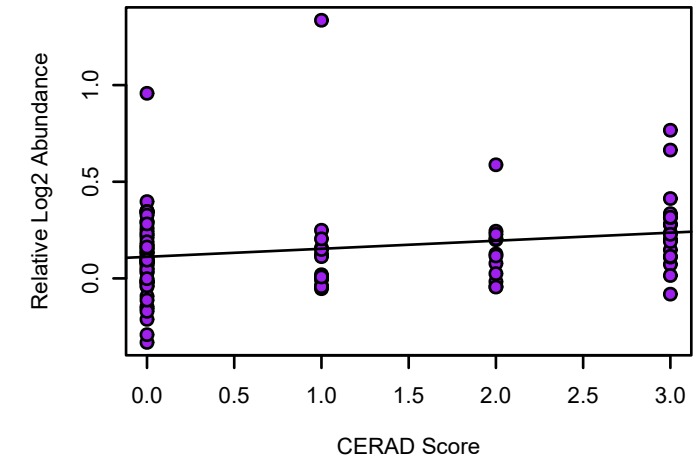

**H2AFY2 UPenn Mixed PRM**  
**NA grey20 MEGA module member**  
**K-W ANOVA p: 7.1e-06**

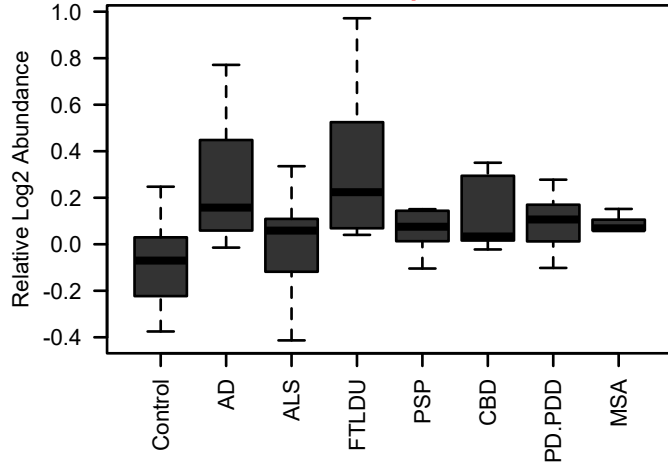

**H2AFY2 UPenn Mixed PRM**  
**K-W ANOVA p: 3.9e-05**

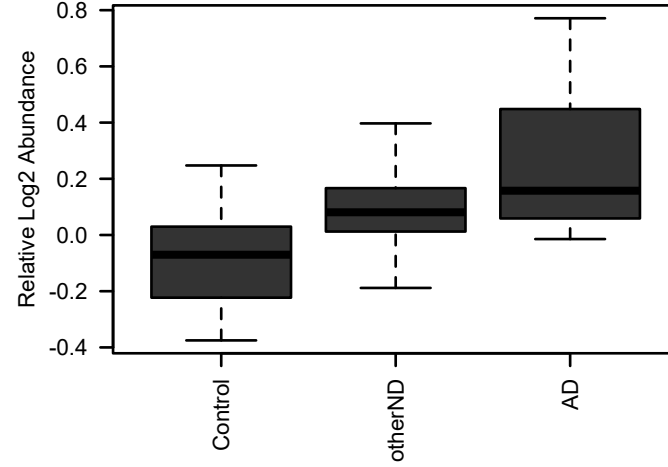

**bicor=0.39, p=0.00025**  
**cor=0.4, p=0.00016**

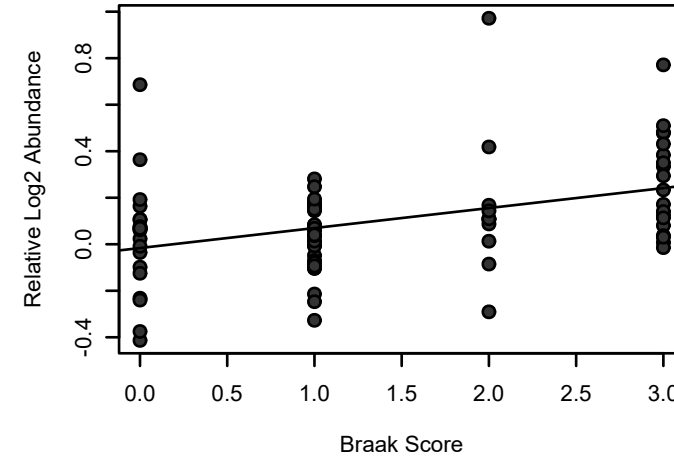

**bicor=0.31, p=0.0018**  
**cor=0.31, p=0.0017**

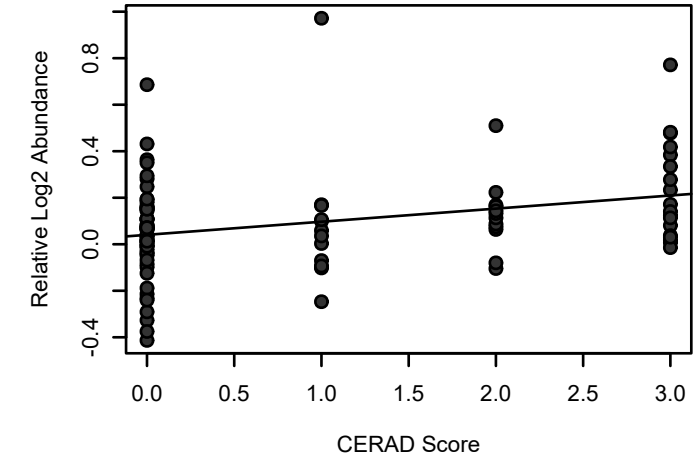

**PSIP1 UPenn Mixed PRM**  
**M10 purple MEGA module member**  
**K-W ANOVA p: 0.35**

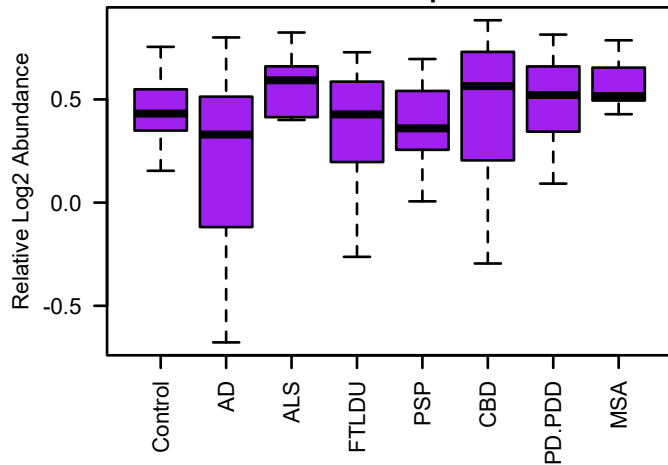

**PSIP1 UPenn Mixed PRM**  
**K-W ANOVA p: 0.043**

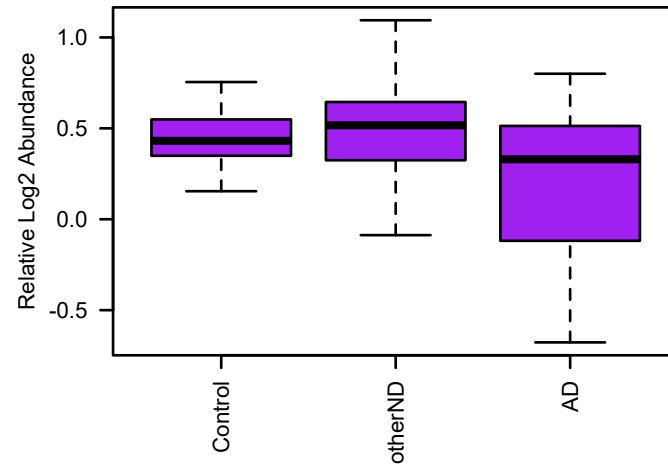

**bicor=-0.14, p=0.21**  
**cor=-0.13, p=0.24**

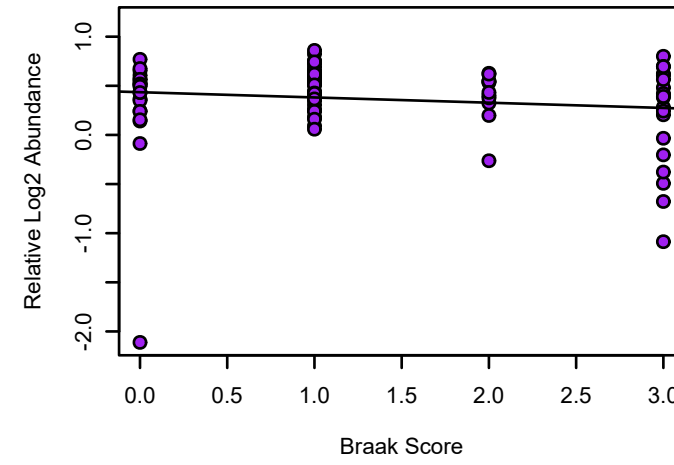

**bicor=-0.19, p=0.059**  
**cor=-0.2, p=0.046**

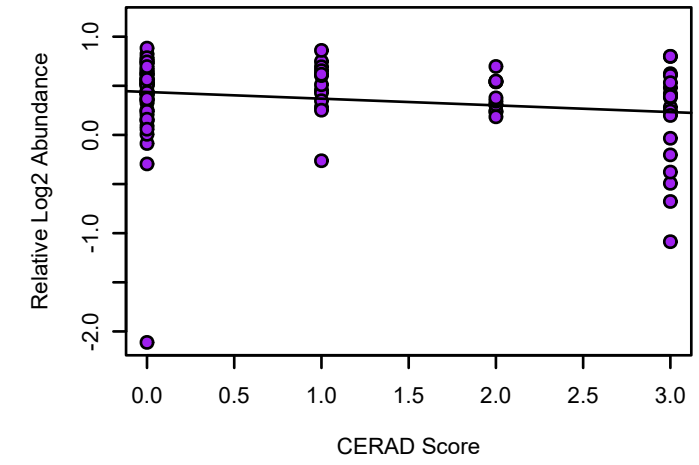

**NDUFS3 UPenn Mixed PRM**  
**M3 brown MEGA module member**  
**K-W ANOVA p: 0.0061**

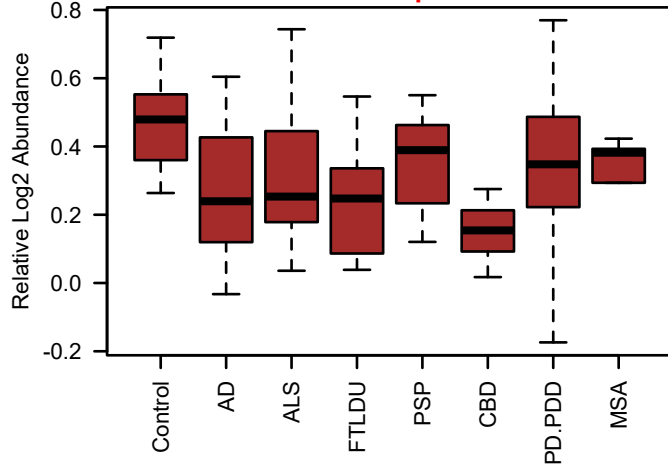

**NDUFS3 UPenn Mixed PRM**  
**K-W ANOVA p: 0.0056**

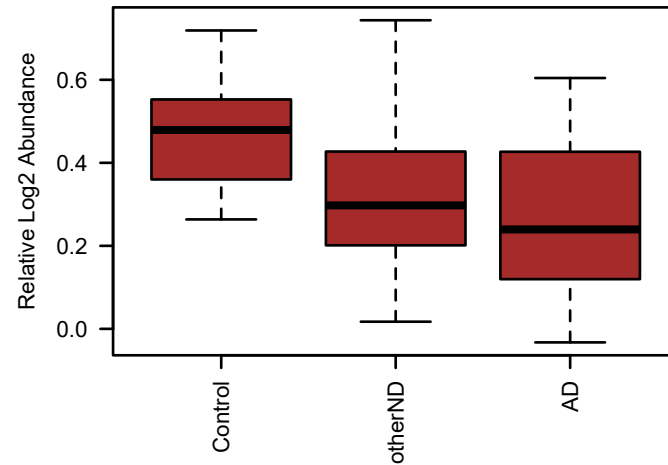

**bicor=-0.25, p=0.021**  
**cor=-0.26, p=0.017**

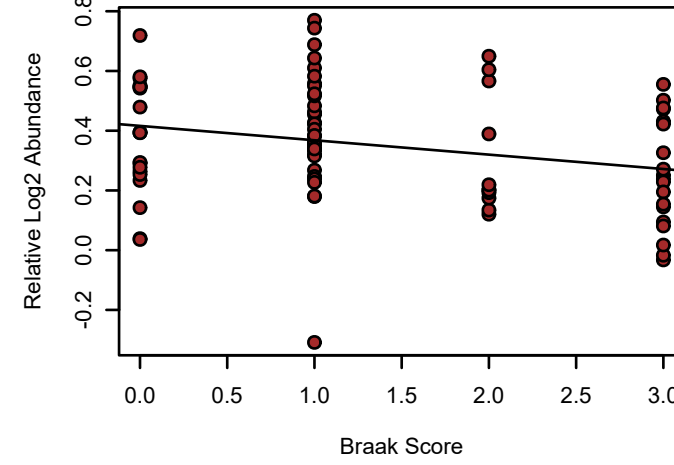

**bicor=-0.23, p=0.019**  
**cor=-0.23, p=0.021**

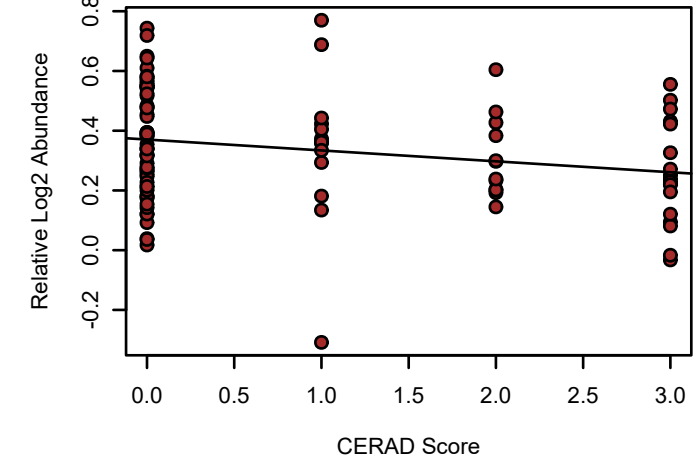

**PALM red MEGA module member**  
M6 red MEGA module member  
K-W ANOVA p: 0.28

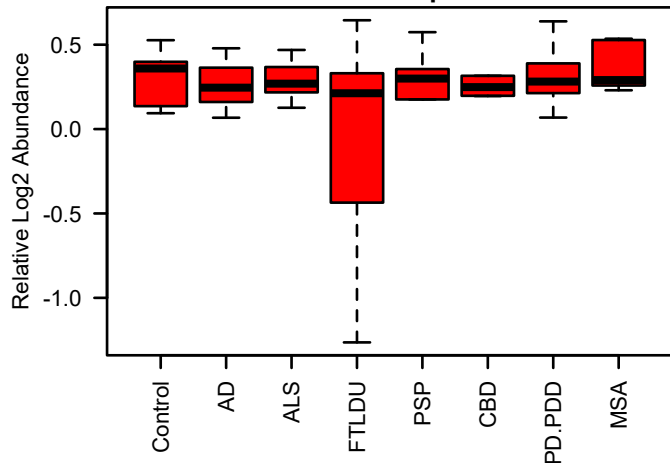

**PALM UPenn Mixed PRM**  
K-W ANOVA p: 0.85

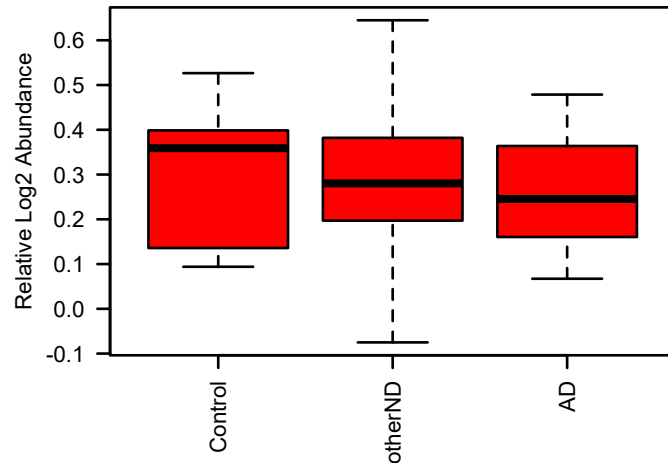

**bicor=-0.028, p=0.8**  
**cor=0.12, p=0.28**

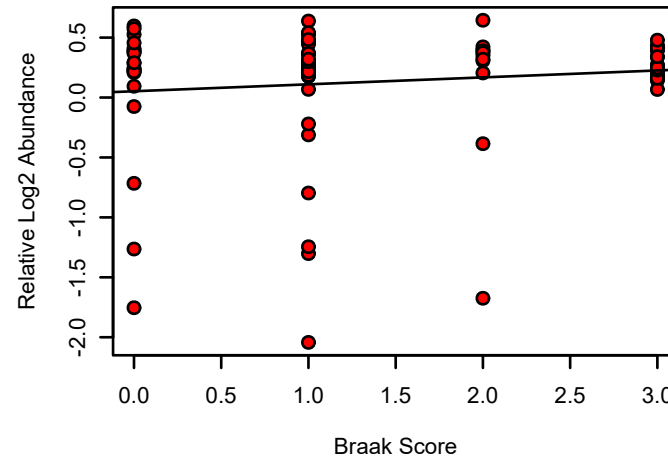

**bicor=-0.15, p=0.13**  
**cor=0.073, p=0.47**

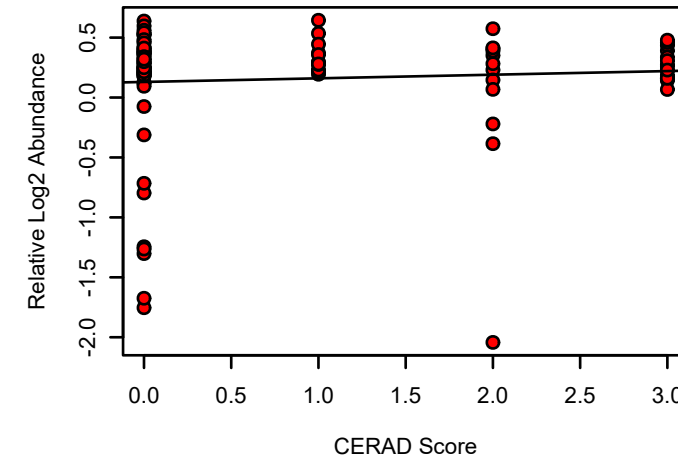

**ATP5H UPenn Mixed PRM**  
M3 brown MEGA module member  
K-W ANOVA p: 0.81

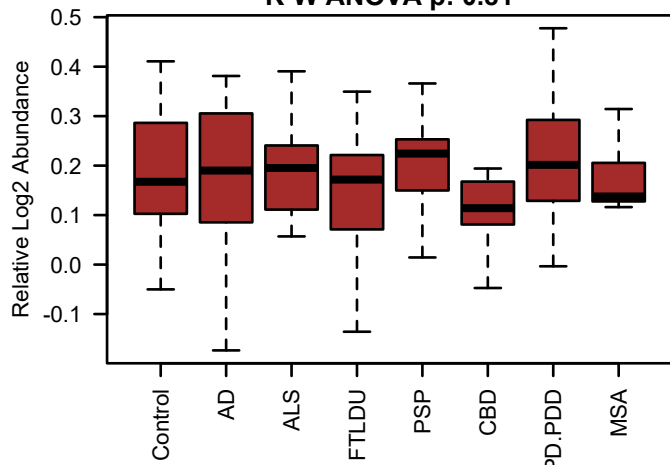

**ATP5H UPenn Mixed PRM**  
K-W ANOVA p: 0.84

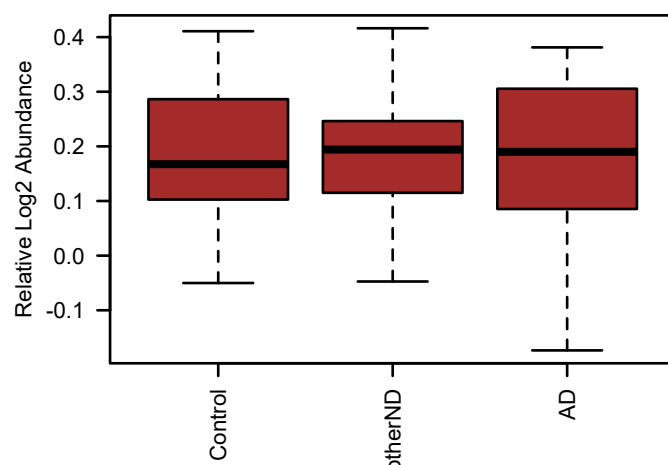

**bicor=-0.031, p=0.78**  
**cor=-0.08, p=0.47**

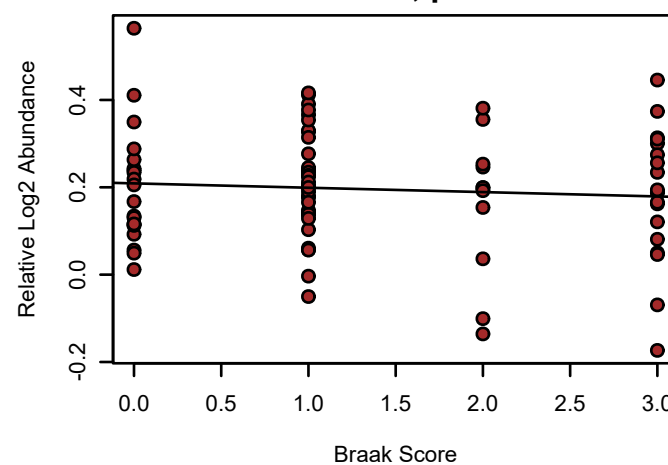

**bicor=0.057, p=0.57**  
**cor=0.027, p=0.79**

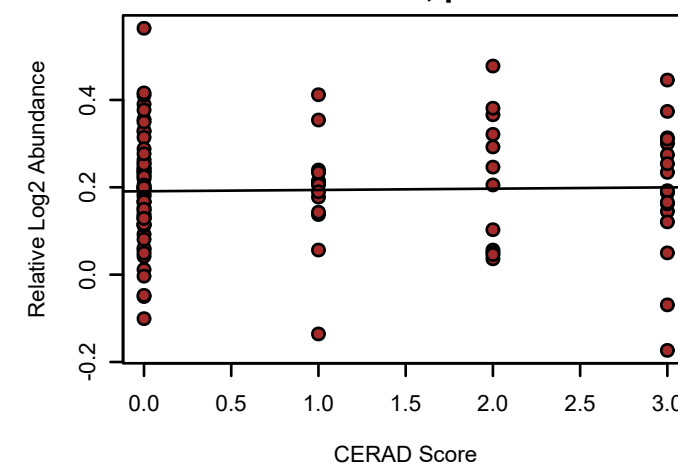

**AP2A2 UPenn Mixed PRM**  
M1 turquoise MEGA module member  
K-W ANOVA p: 0.014

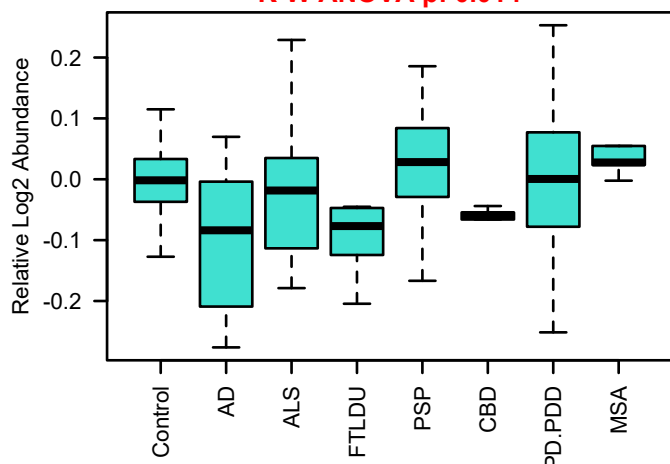

**AP2A2 UPenn Mixed PRM**  
K-W ANOVA p: 0.014

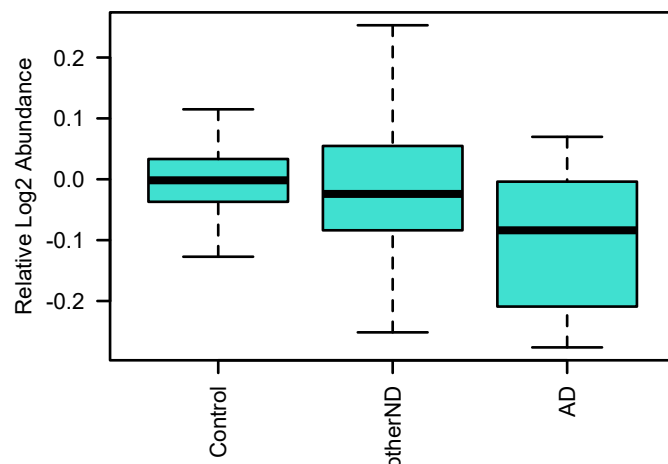

**bicor=-0.19, p=0.076**  
**cor=-0.2, p=0.068**

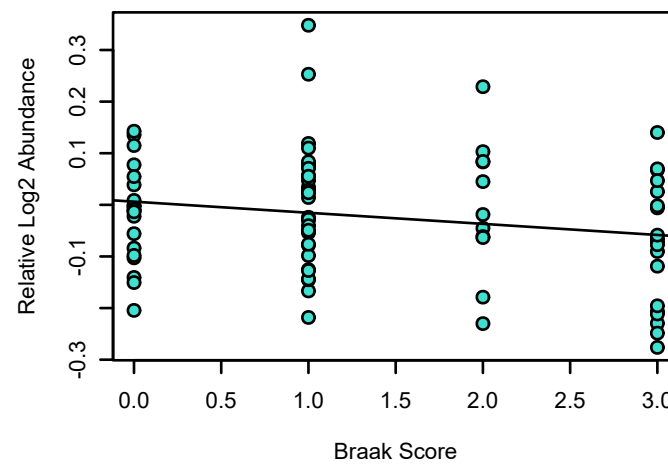

**bicor=-0.17, p=0.084**  
**cor=-0.18, p=0.073**

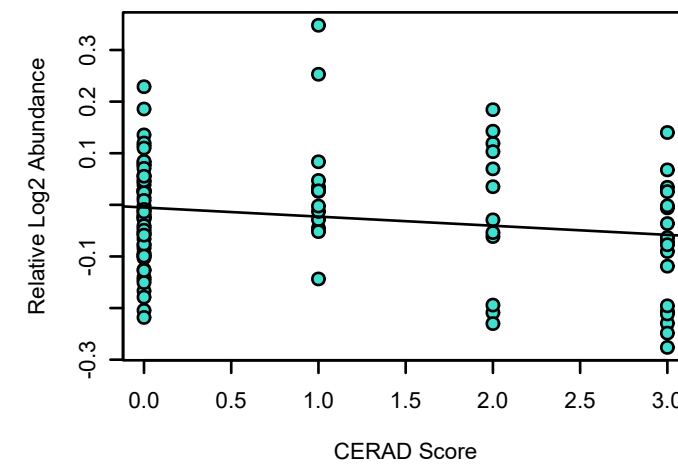

**DIRAS1 UPenn Mixed PRM**  
NA grey MEGA module member  
K-W ANOVA p: 0.028

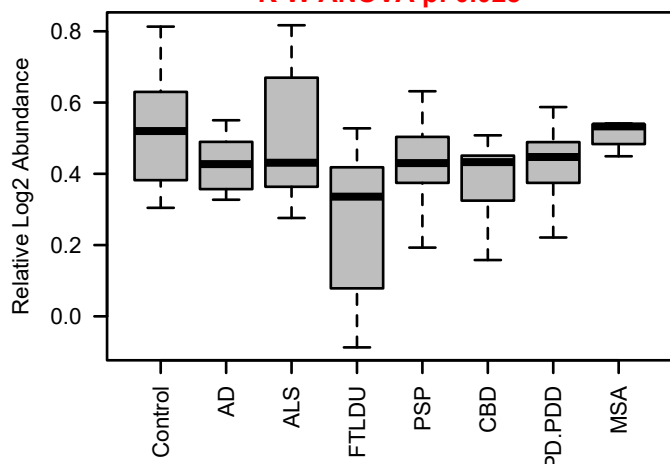

**DIRAS1 UPenn Mixed PRM**  
K-W ANOVA p: 0.24

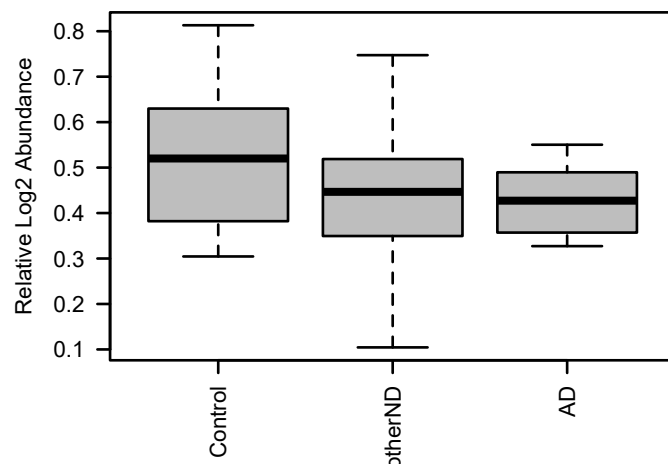

**bicor=-0.092, p=0.4**  
**cor=-0.1, p=0.37**

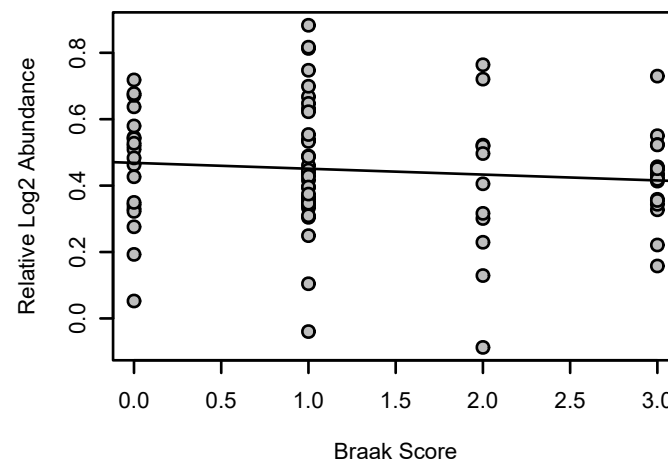

**bicor=-0.14, p=0.17**  
**cor=-0.12, p=0.23**

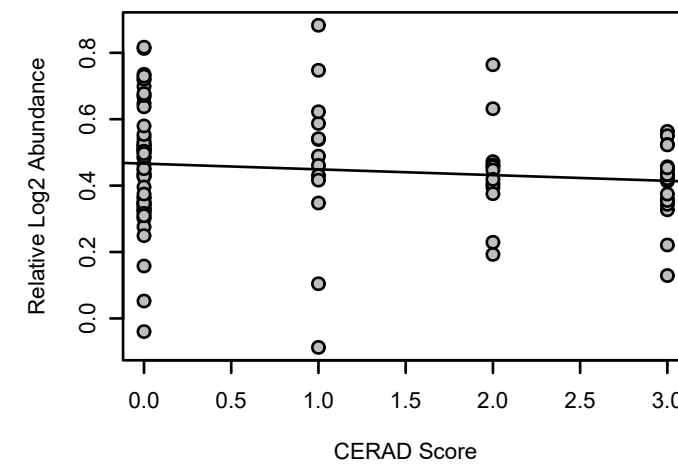

**RTN3 UPenn Mixed PRM**  
M6 red MEGA module member  
K-W ANOVA p: 0.17

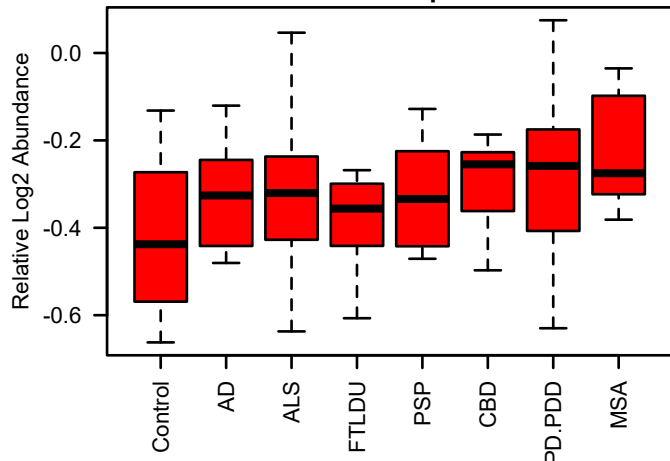

**RTN3 UPenn Mixed PRM**  
K-W ANOVA p: 0.024

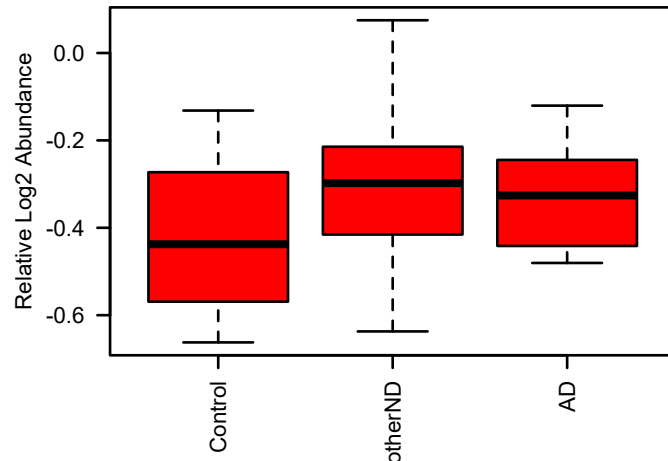

**bicor=0.032, p=0.77**  
**cor=0.019, p=0.86**

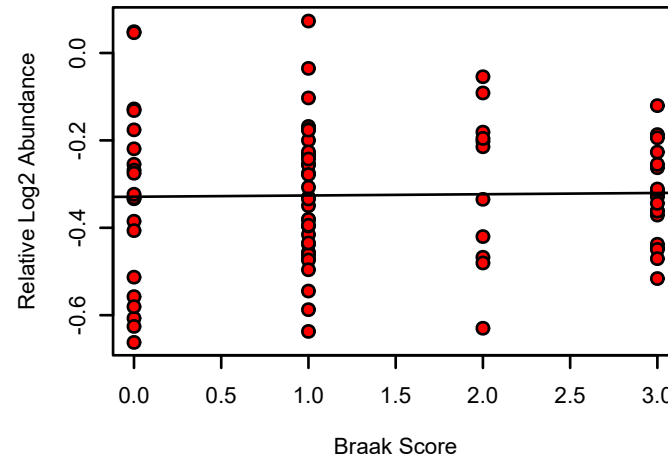

**bicor=0.013, p=0.9**  
**cor=0.0066, p=0.95**

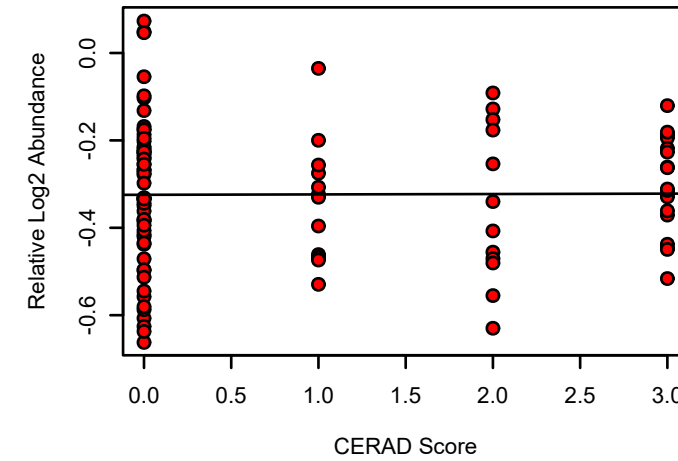

**LETM1 UPenn Mixed PRM**  
M1 turquoise MEGA module member  
K-W ANOVA p: 0.15

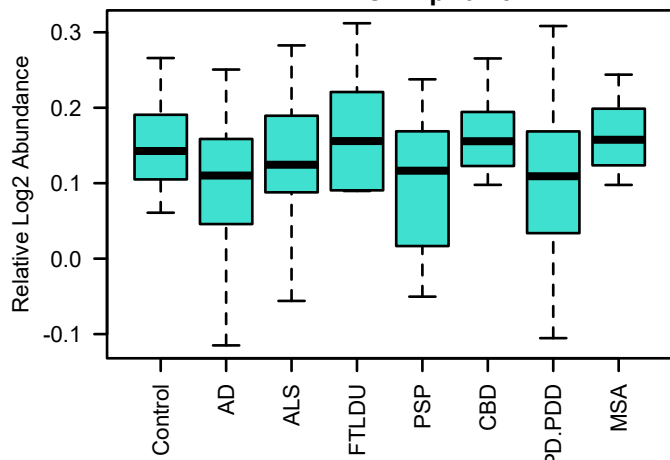

**LETM1 UPenn Mixed PRM**  
K-W ANOVA p: 0.21

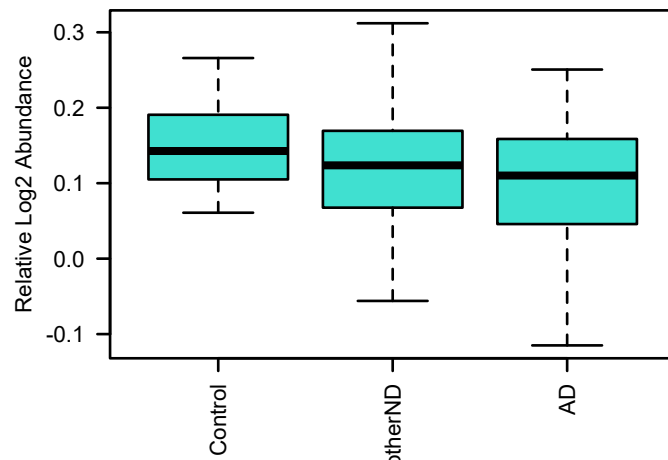

**bicor=-0.25, p=0.02**  
**cor=-0.27, p=0.013**

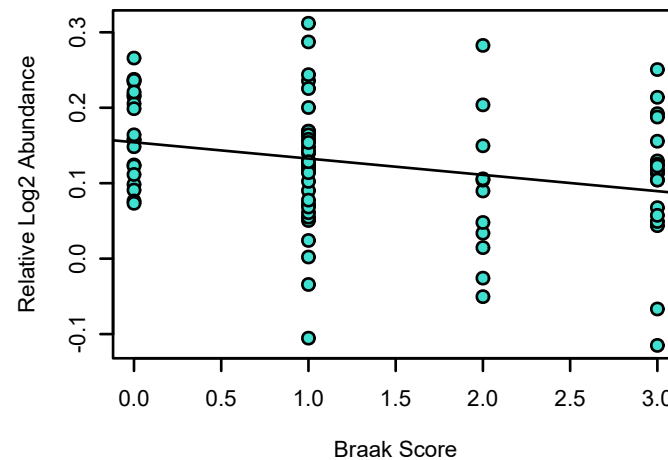

**bicor=-0.19, p=0.058**  
**cor=-0.19, p=0.058**

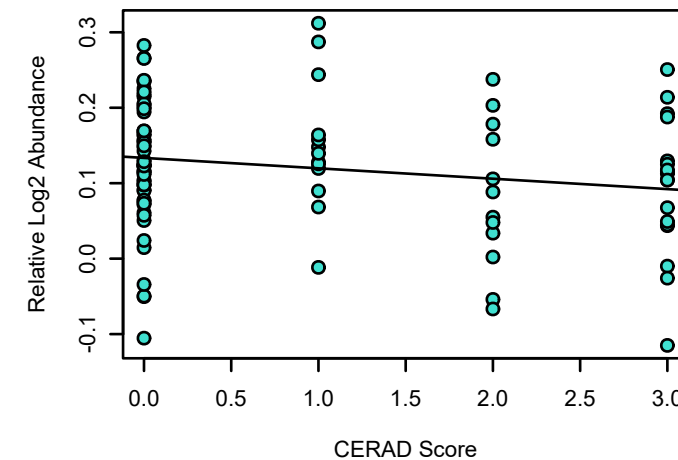

**PGLS UPenn Mixed PRM**  
M4 yellow MEGA module member  
K-W ANOVA p: 1e-05

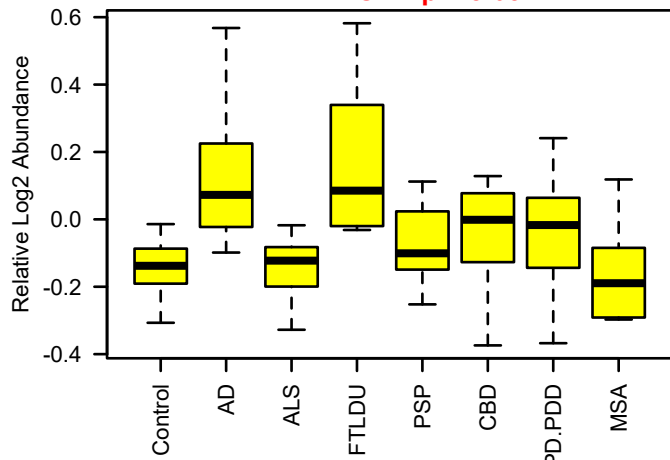

**PGLS UPenn Mixed PRM**  
K-W ANOVA p: 0.001

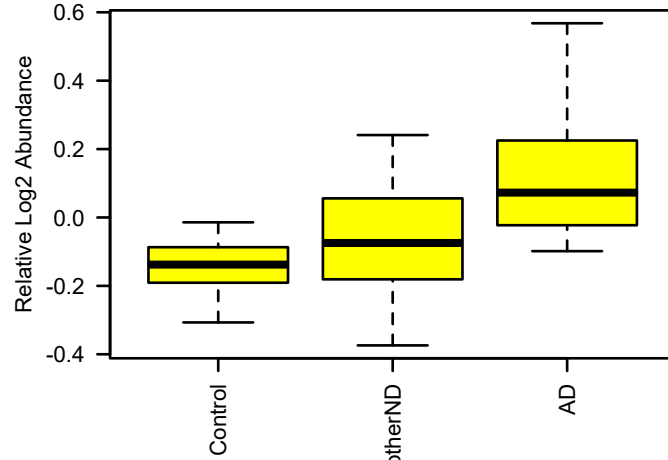

**bicor=0.36, p=0.00072**  
**cor=0.31, p=0.0041**

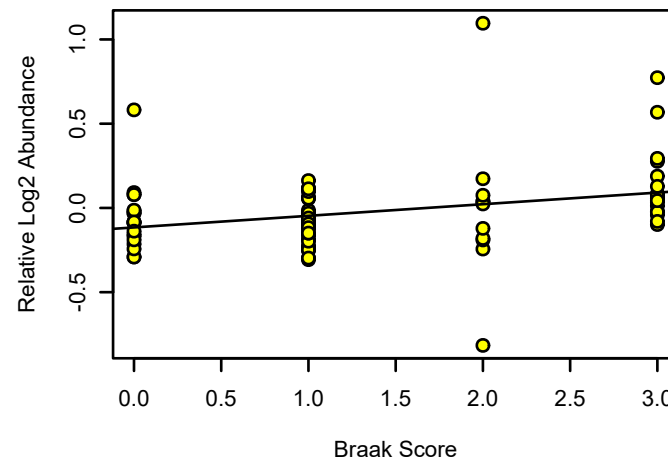

**bicor=0.37, p=0.00016**  
**cor=0.33, p=8e-04**

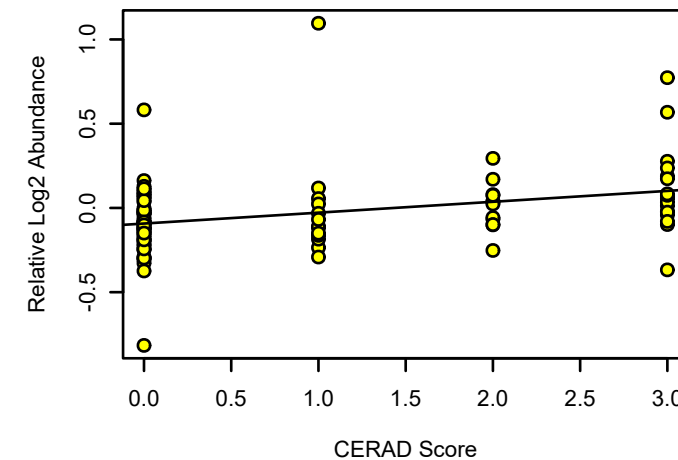

**RAB3D UPenn Mixed PRM**  
M1 turquoise MEGA module member  
K-W ANOVA p: 0.0072

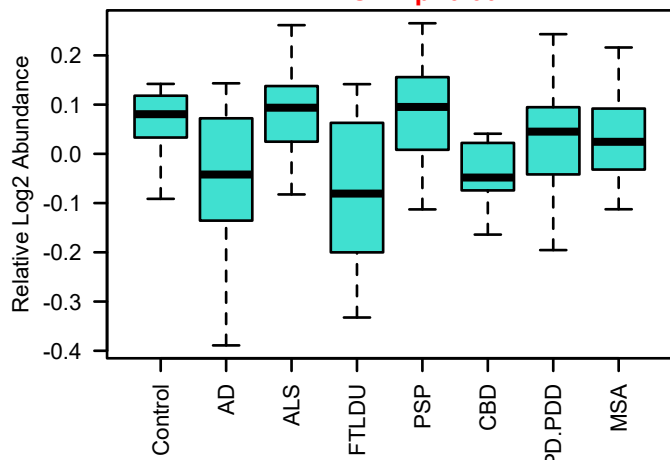

**RAB3D UPenn Mixed PRM**  
K-W ANOVA p: 0.018

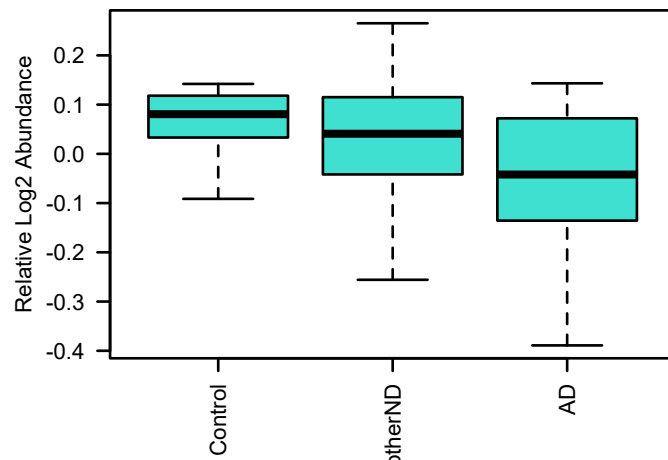

**bicor=-0.25, p=0.023**  
**cor=-0.23, p=0.035**

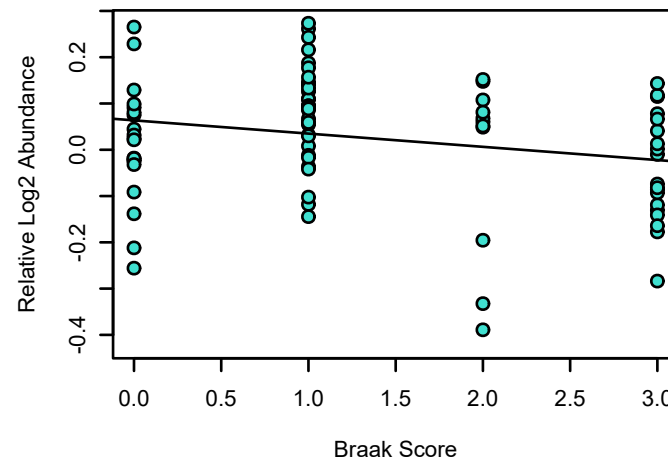

**bicor=-0.14, p=0.15**  
**cor=-0.16, p=0.11**

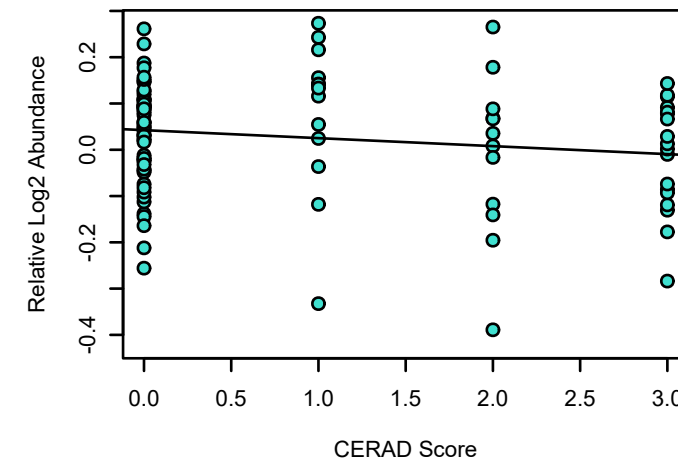



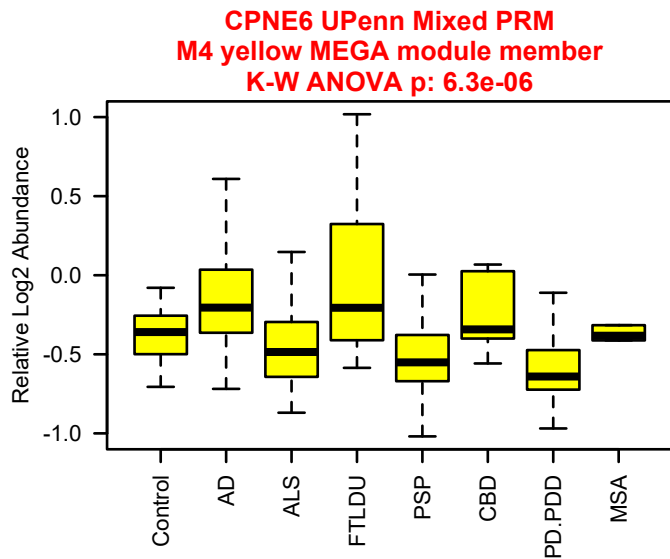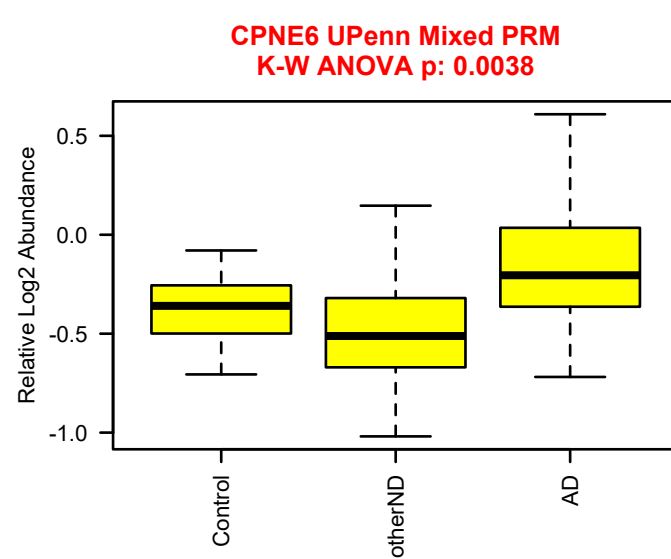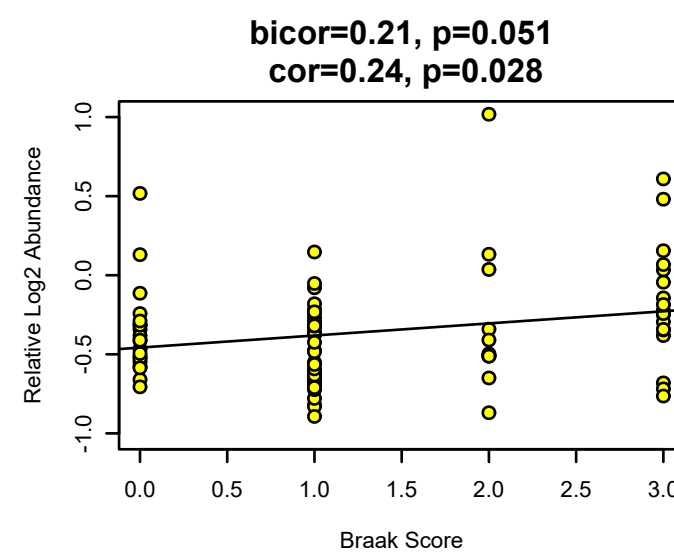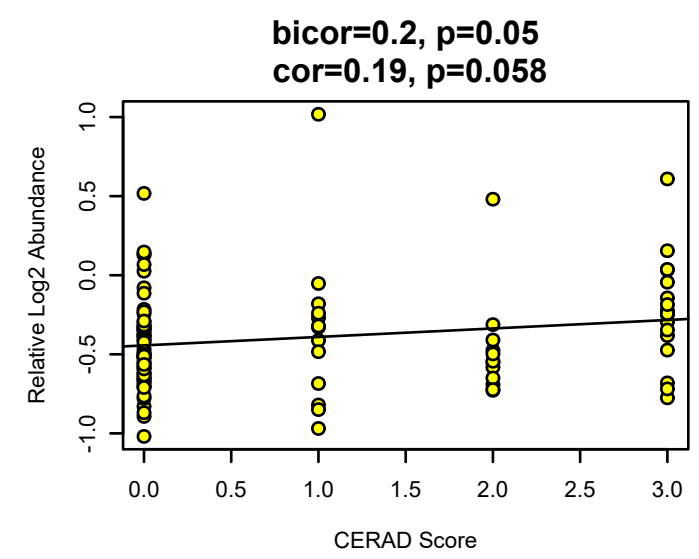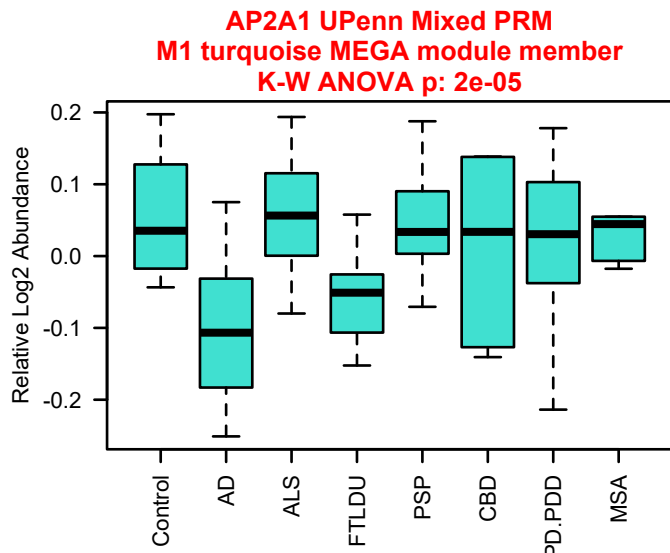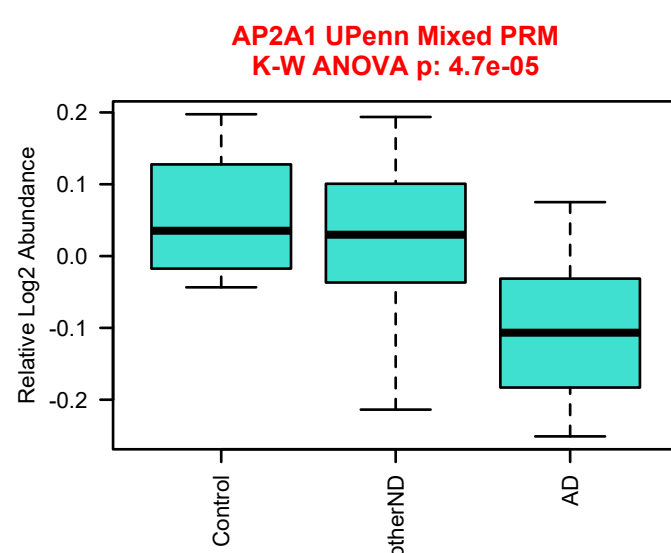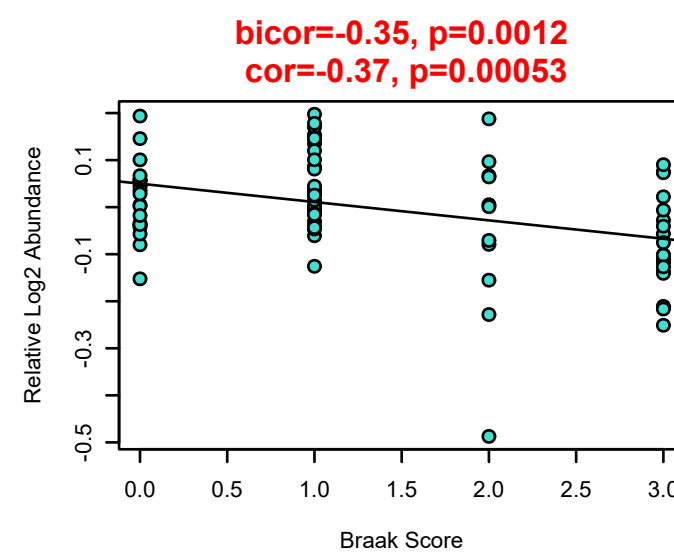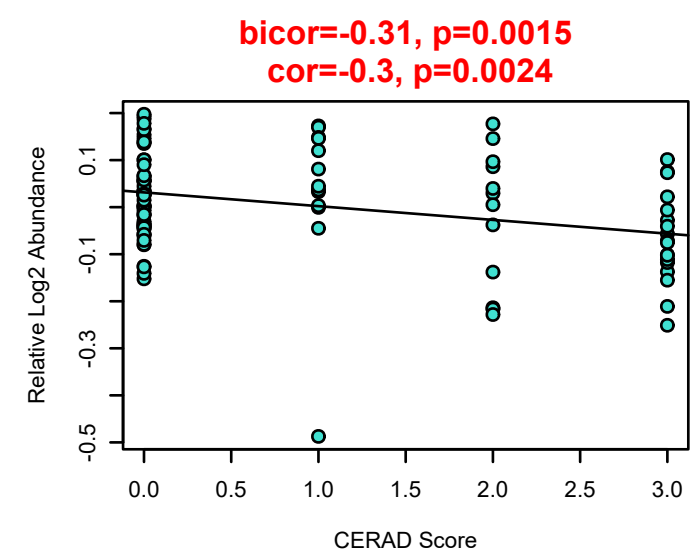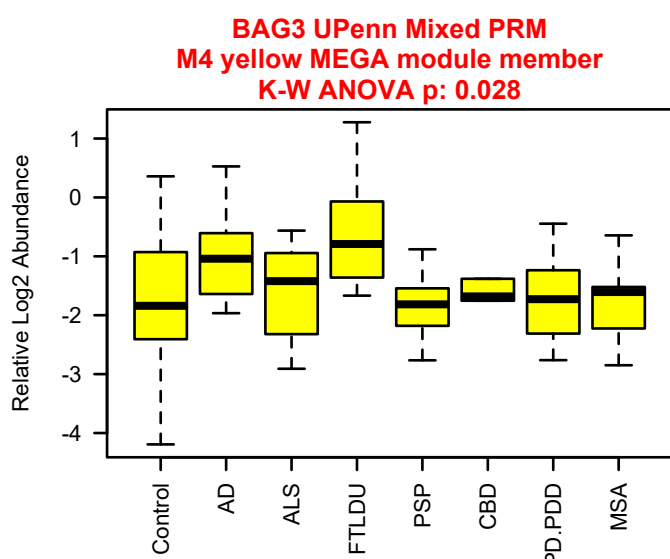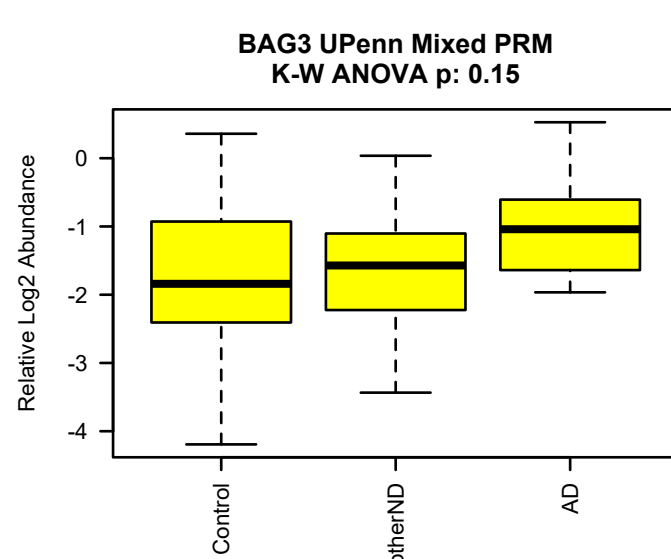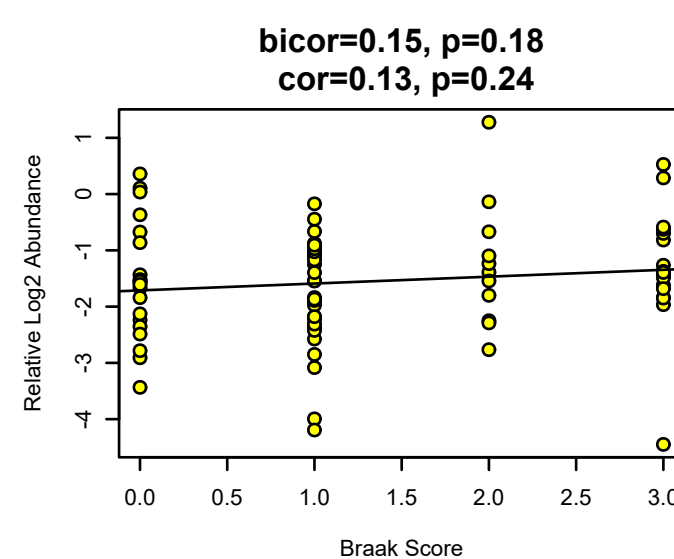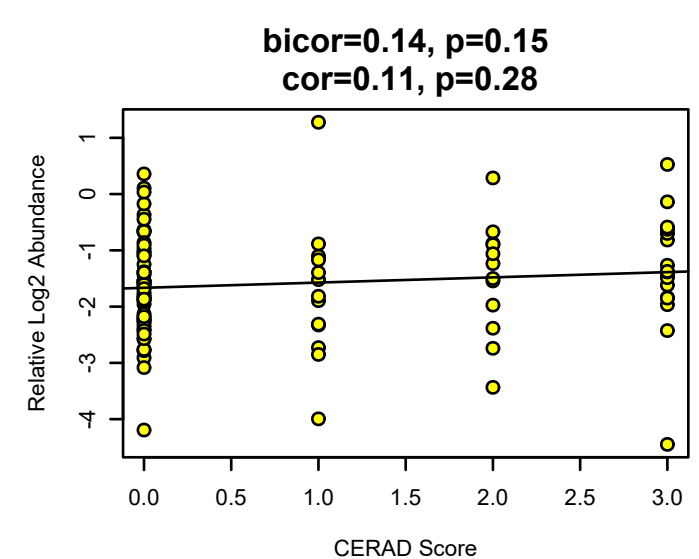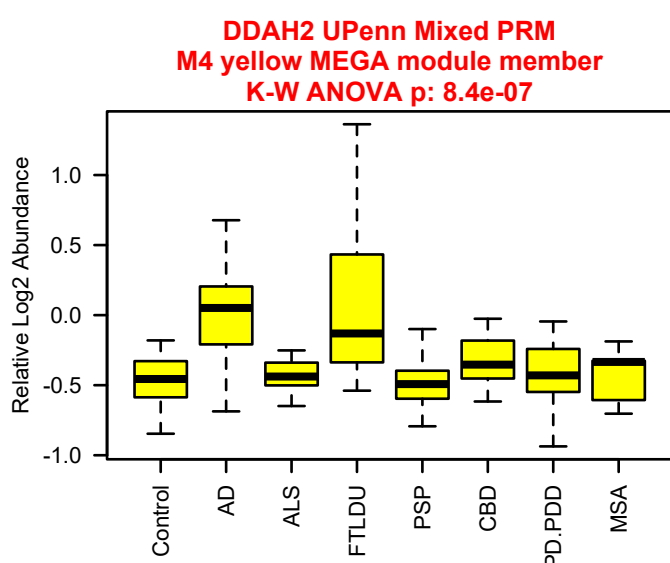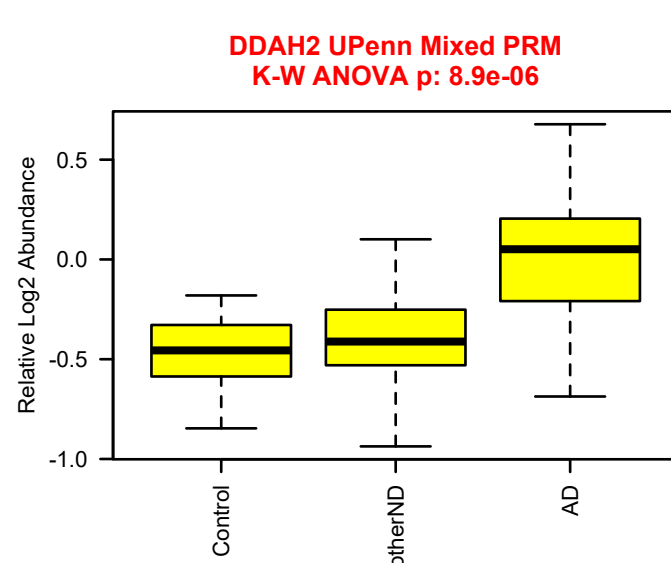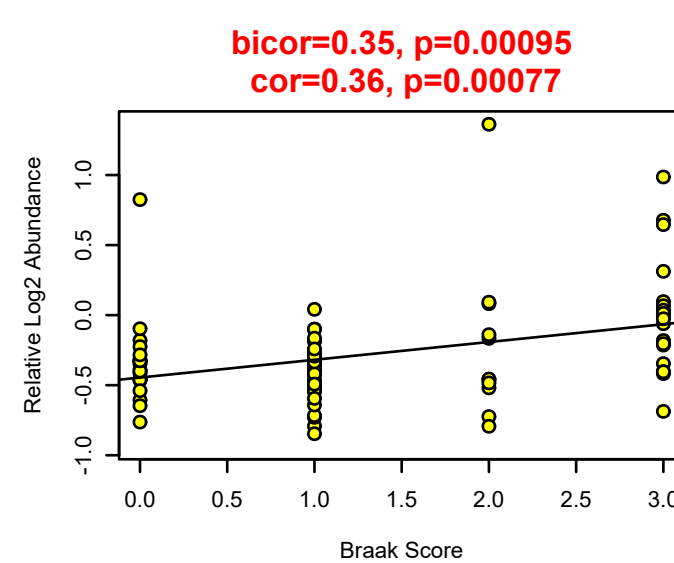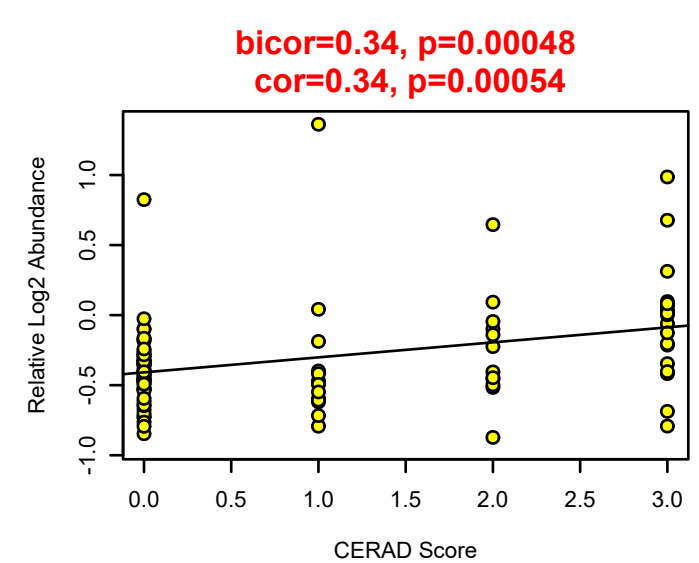

**AK1 UPenn Mixed PRM**  
M4 yellow MEGA module member  
K-W ANOVA p: 0.0049

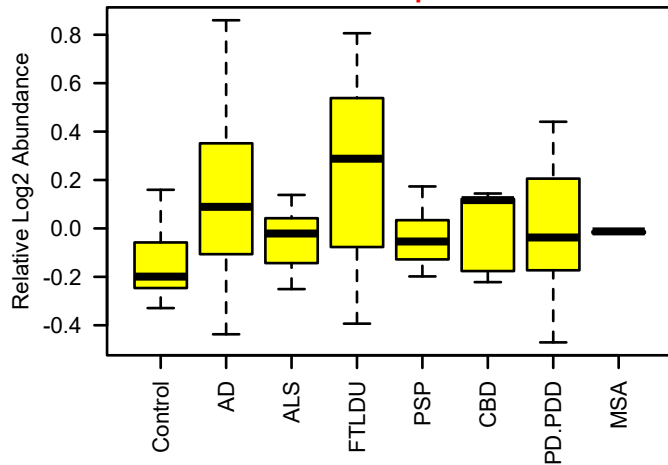

**AK1 UPenn Mixed PRM**  
K-W ANOVA p: 0.0014

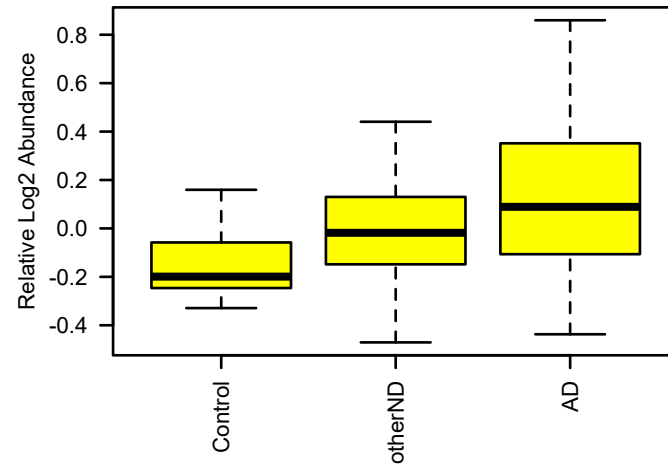

**bicor=0.27, p=0.015**  
**cor=0.28, p=0.0099**

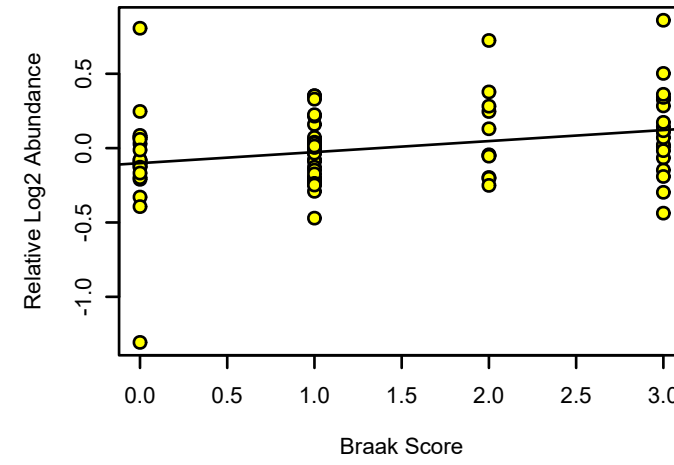

**bicor=0.19, p=0.057**  
**cor=0.22, p=0.028**

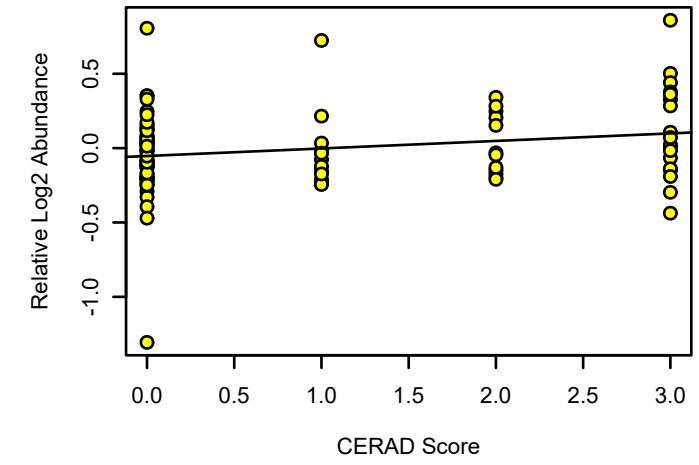

**LMNA UPenn Mixed PRM**  
M4 yellow MEGA module member  
K-W ANOVA p: 7.1e-06

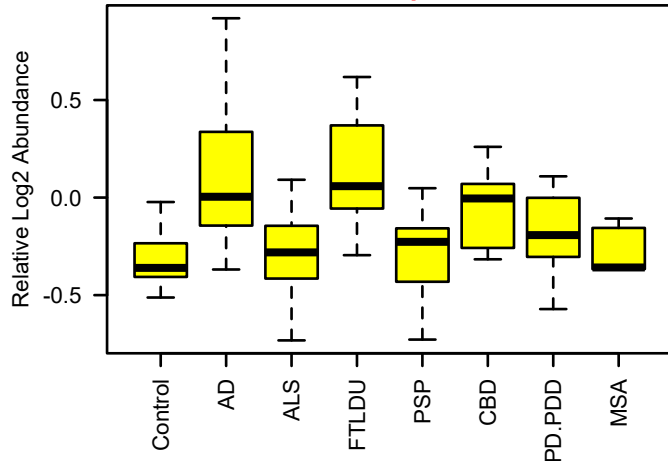

**LMNA UPenn Mixed PRM**  
K-W ANOVA p: 0.00021

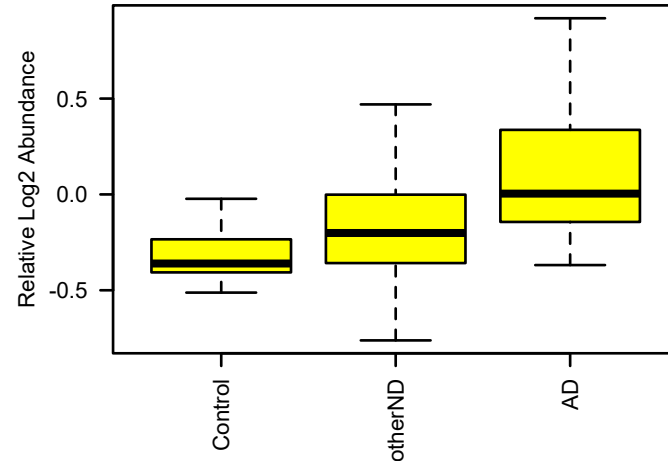

**bicor=0.34, p=0.0013**  
**cor=0.36, p=0.0077**

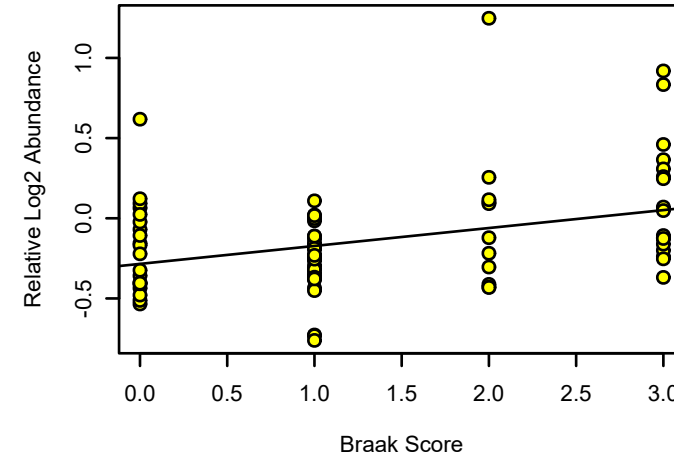

**bicor=0.25, p=0.011**  
**cor=0.28, p=0.0048**

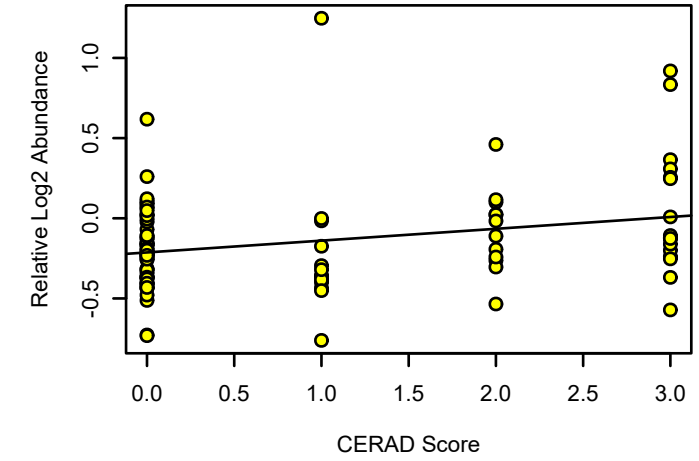

**CSTB UPenn Mixed PRM**  
M4 yellow MEGA module member  
K-W ANOVA p: 8e-08

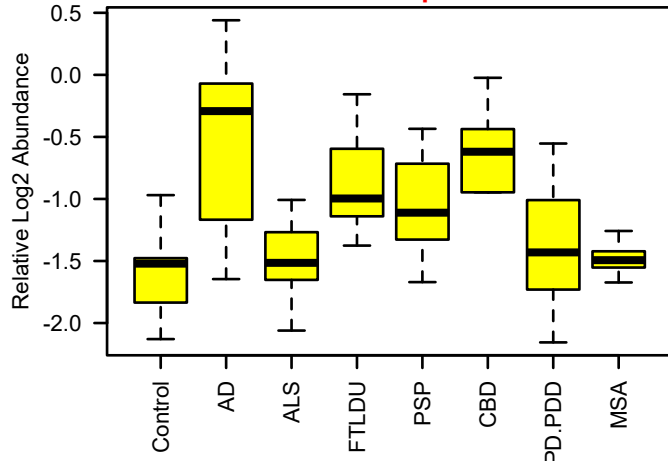

**CSTB UPenn Mixed PRM**  
K-W ANOVA p: 7.8e-08

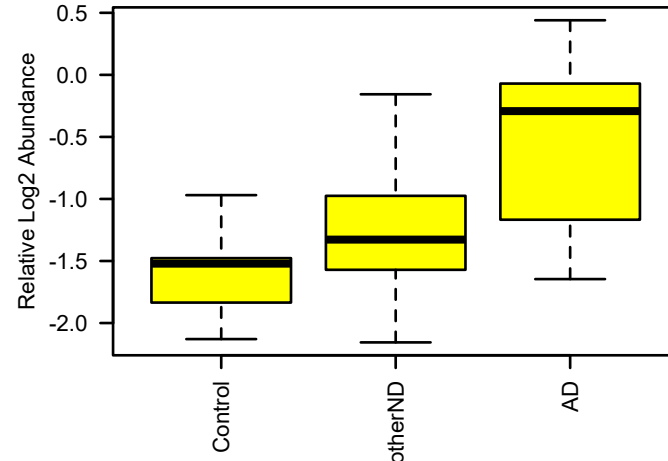

**bicor=0.43, p=5.4e-05**  
**cor=0.42, p=7e-05**

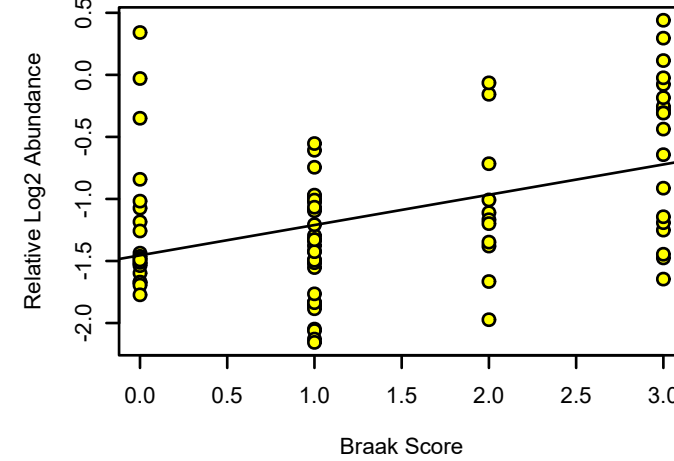

**bicor=0.29, p=0.0032**  
**cor=0.33, p=8e-04**

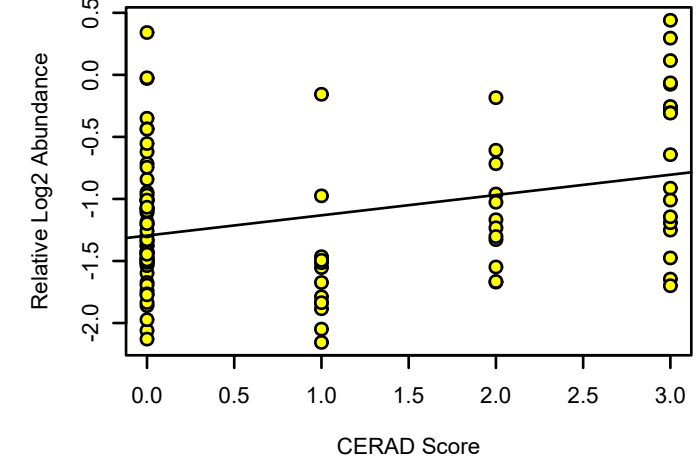

**ANXA1 UPenn Mixed PRM**  
M5 green MEGA module member  
K-W ANOVA p: 6.6e-05

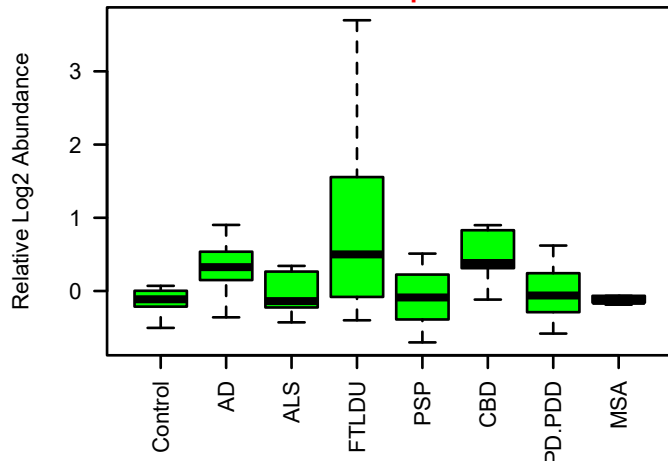

**ANXA1 UPenn Mixed PRM**  
K-W ANOVA p: 0.017

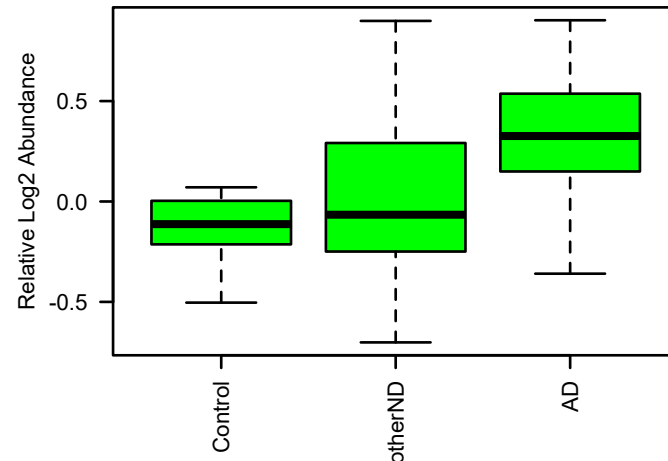

**bicor=0.46, p=9.3e-06**  
**cor=0.32, p=0.003**

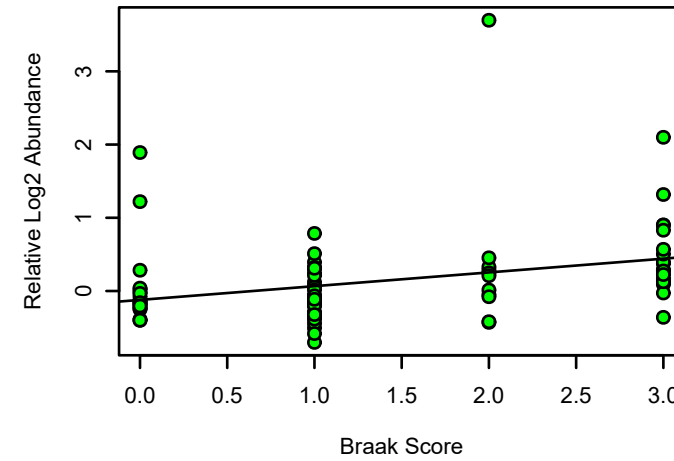

**bicor=0.34, p=5e-04**  
**cor=0.24, p=0.016**

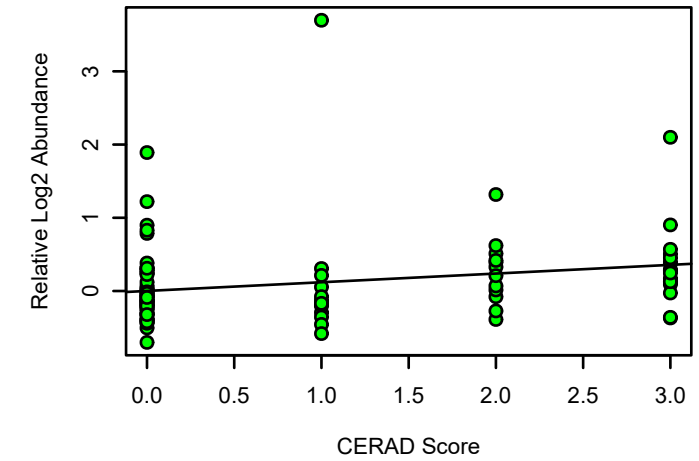

**CAPNS2 UPenn Mixed PRM**  
NA grey20 MEGA module member  
K-W ANOVA p: 5.4e-06

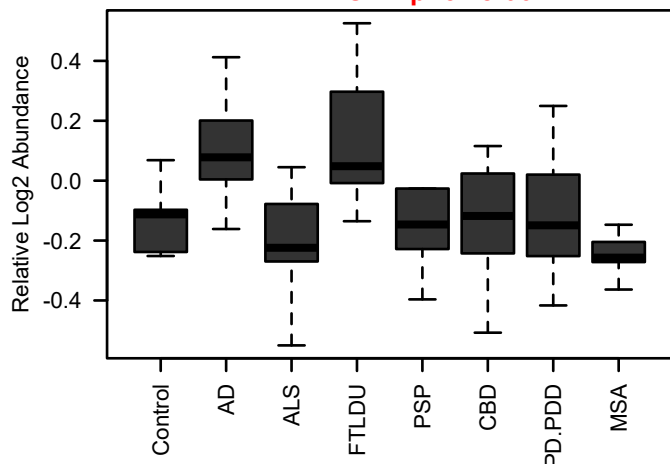

**CAPNS2 UPenn Mixed PRM**  
K-W ANOVA p: 0.00012

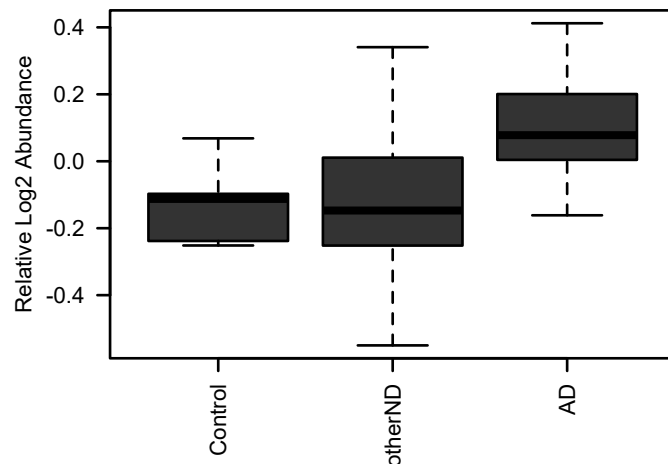

**bicor=0.4, p=0.00013**  
**cor=0.37, p=0.00053**

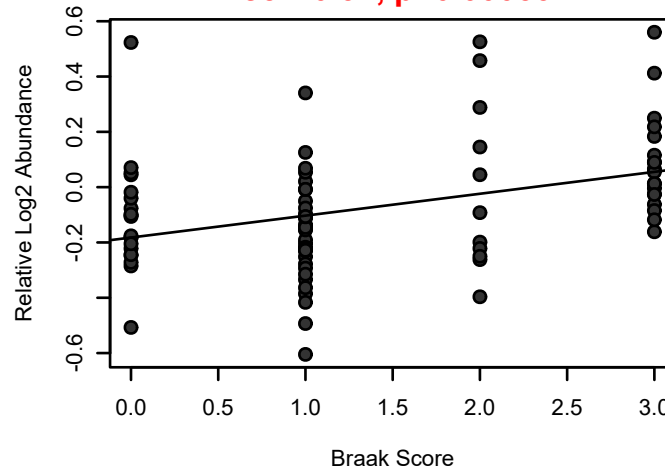

**bicor=0.36, p=0.00025**  
**cor=0.33, p=8e-04**

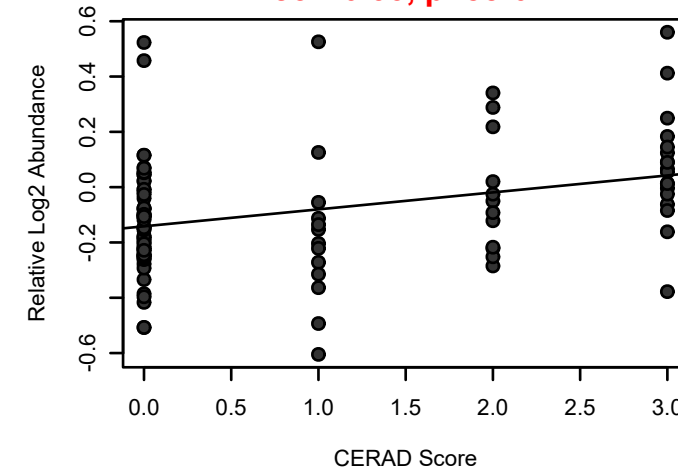

**CAPNS1 UPenn Mixed PRM**  
M4 yellow MEGA module member  
K-W ANOVA p: 0.00012

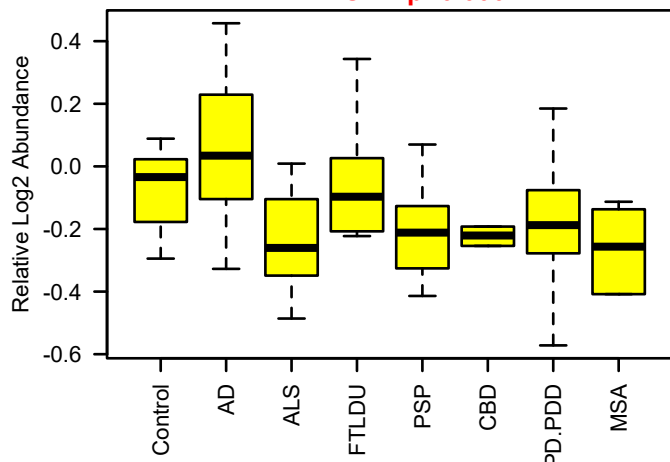

**CAPNS1 UPenn Mixed PRM**  
K-W ANOVA p: 5.7e-06

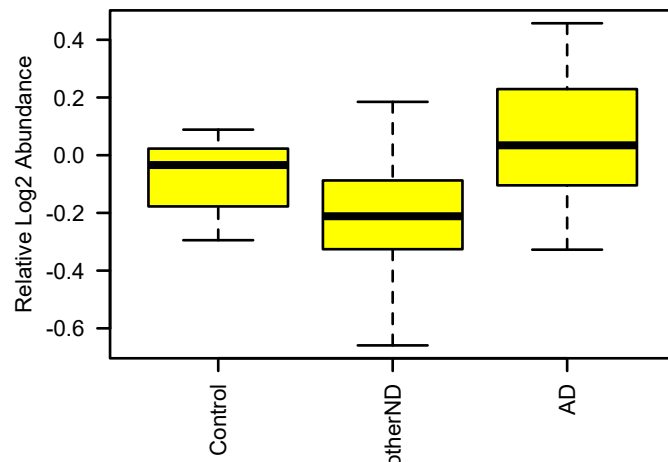

**bicor=0.24, p=0.028**  
**cor=0.27, p=0.013**

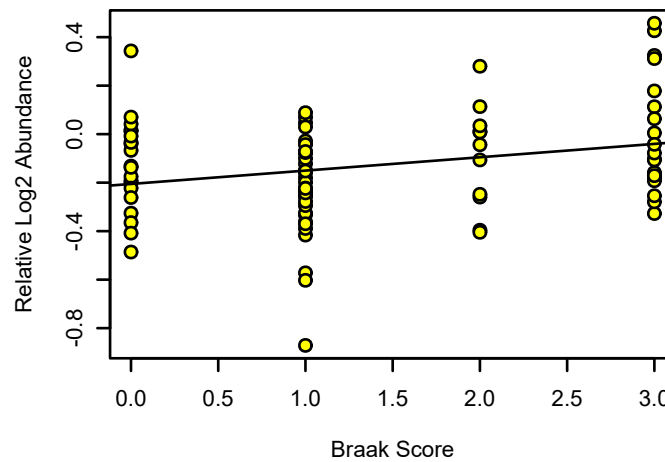

**bicor=0.25, p=0.013**  
**cor=0.27, p=0.0066**

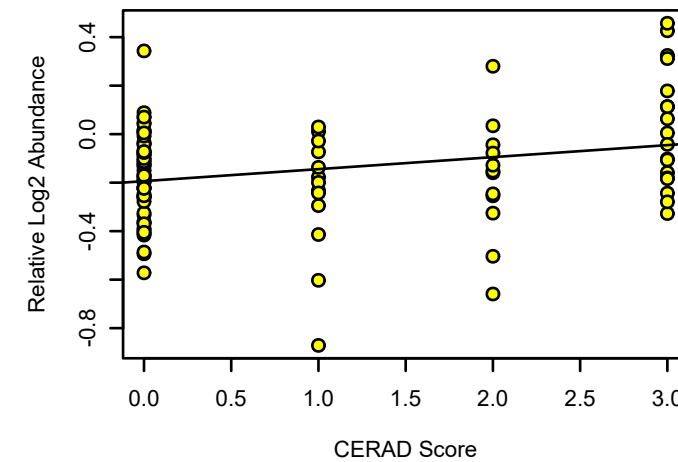

**HSPB1 UPenn Mixed PRM**  
M4 yellow MEGA module member  
K-W ANOVA p: 0.00018

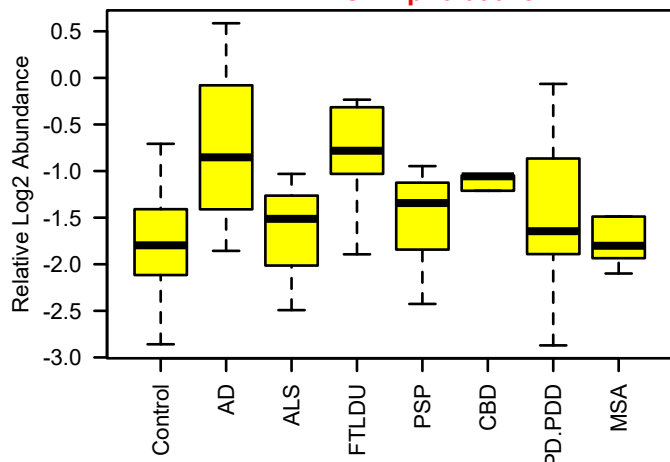

**HSPB1 UPenn Mixed PRM**  
K-W ANOVA p: 3e-04

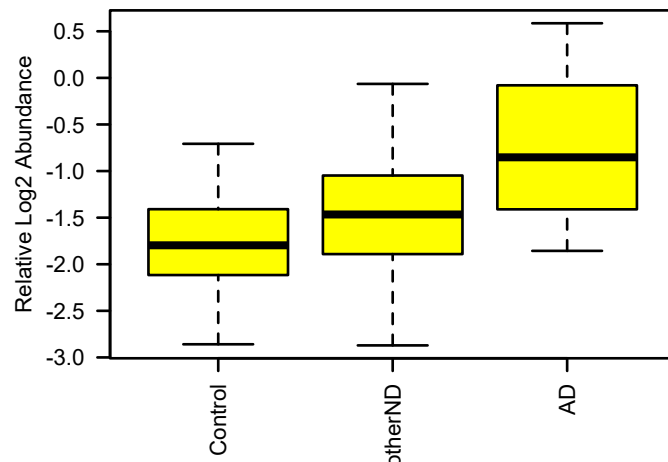

**bicor=0.39, p=0.00024**  
**cor=0.41, p=0.00011**

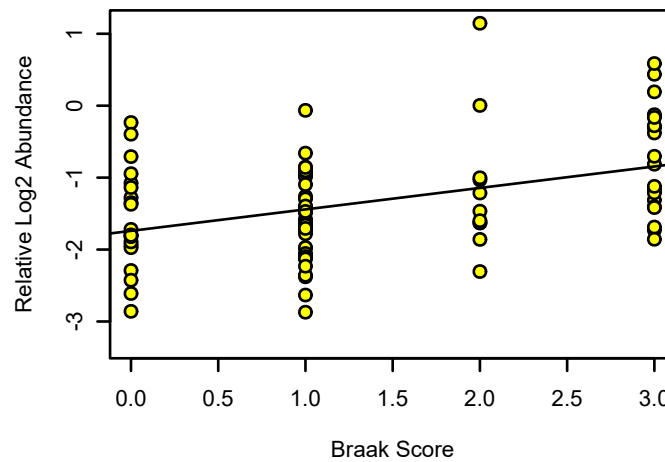

**bicor=0.29, p=0.003**  
**cor=0.3, p=0.0024**

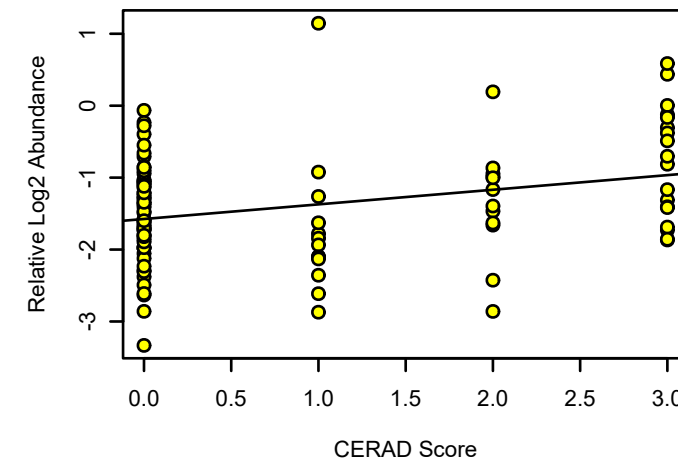

**ITGB1 UPenn Mixed PRM**  
M4 yellow MEGA module member  
K-W ANOVA p: 5.3e-06

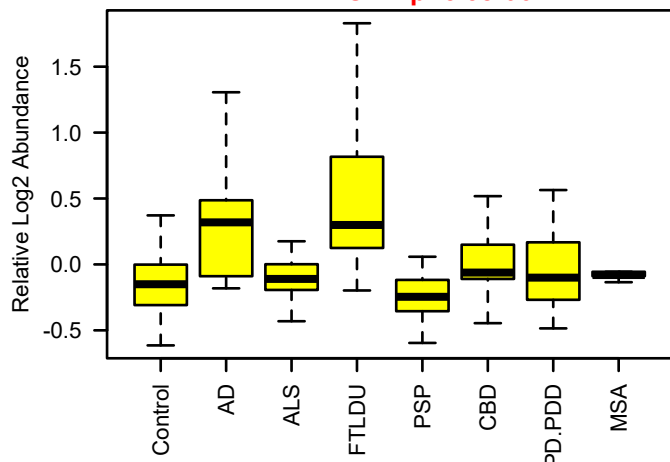

**ITGB1 UPenn Mixed PRM**  
K-W ANOVA p: 0.0011

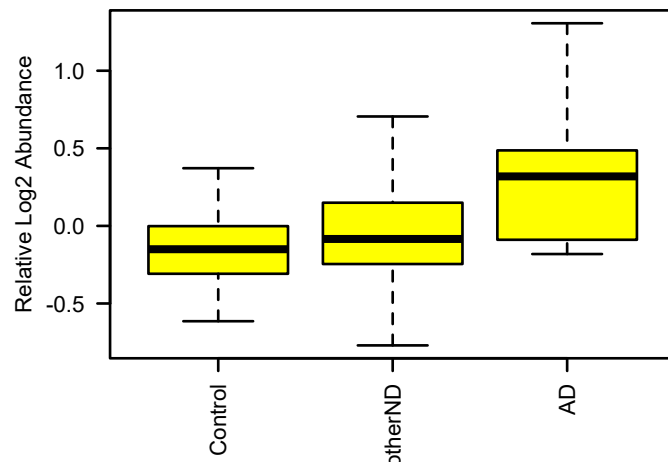

**bicor=0.34, p=0.0014**  
**cor=0.32, p=0.003**

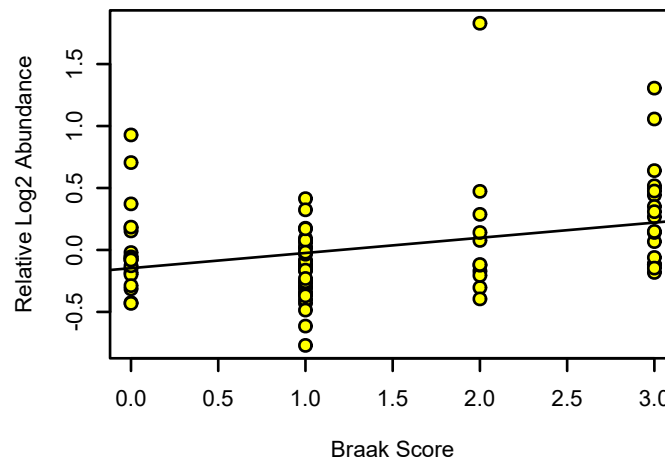

**bicor=0.31, p=0.002**  
**cor=0.29, p=0.0034**

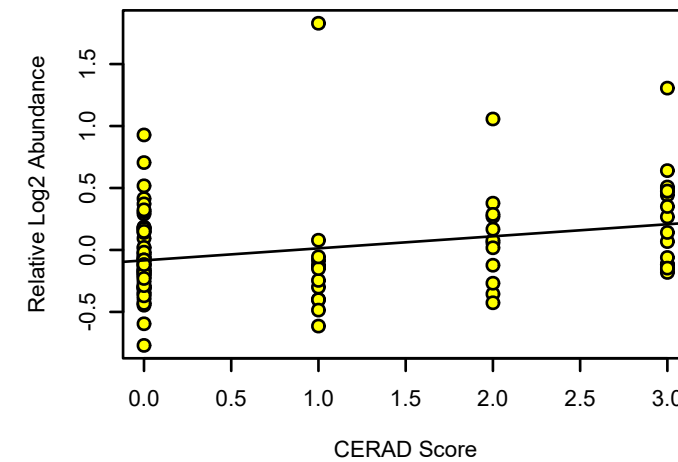



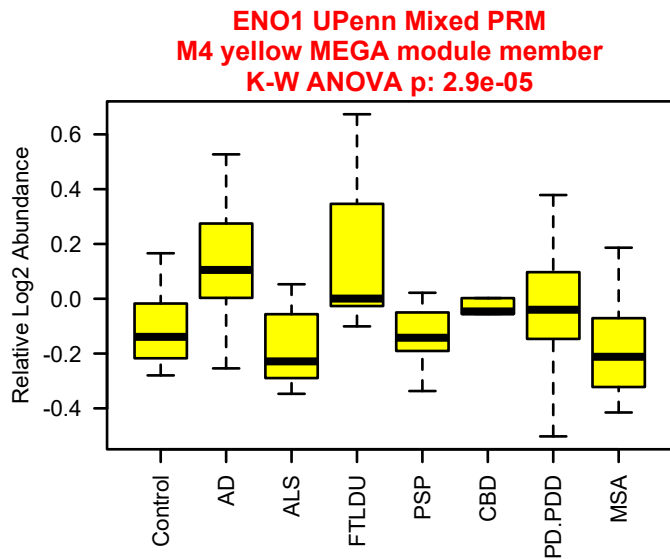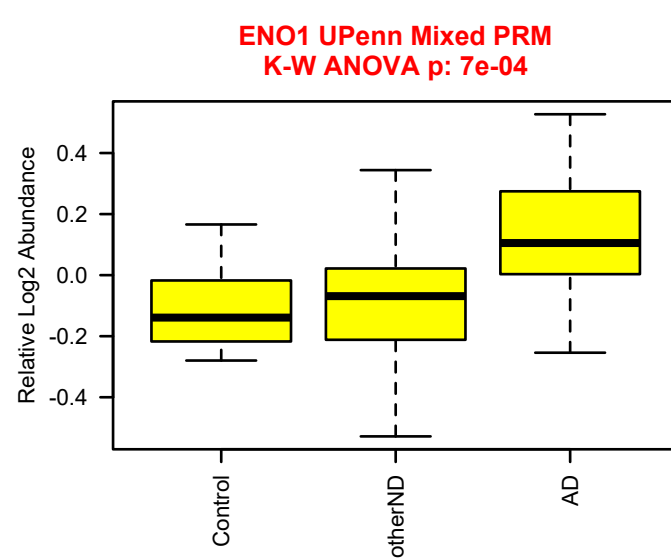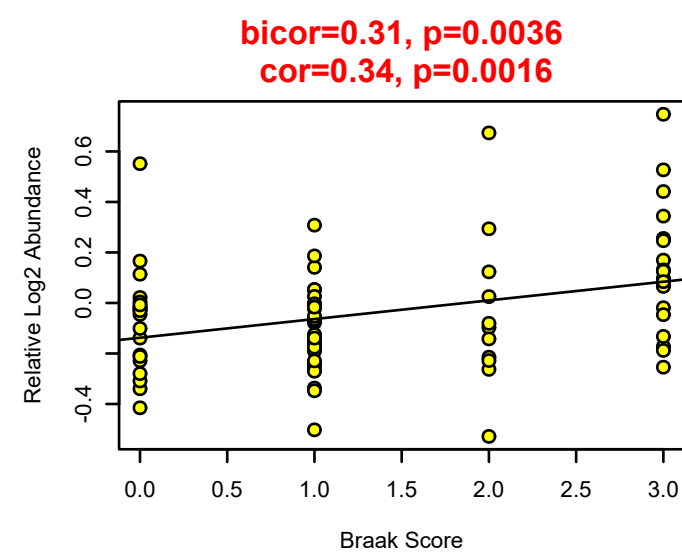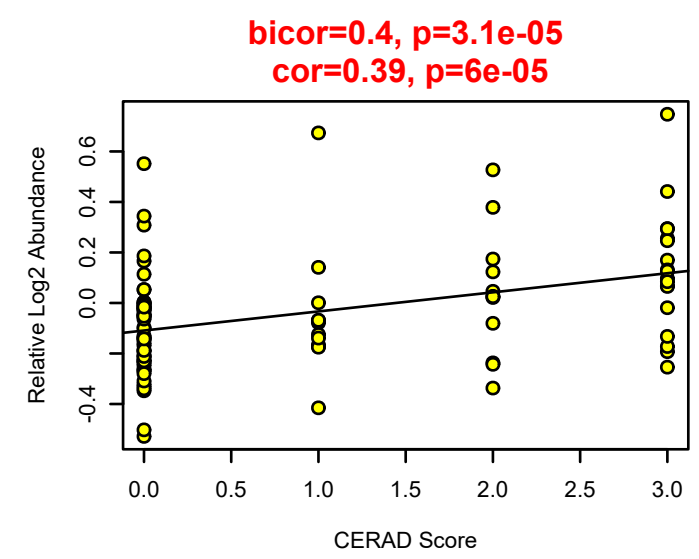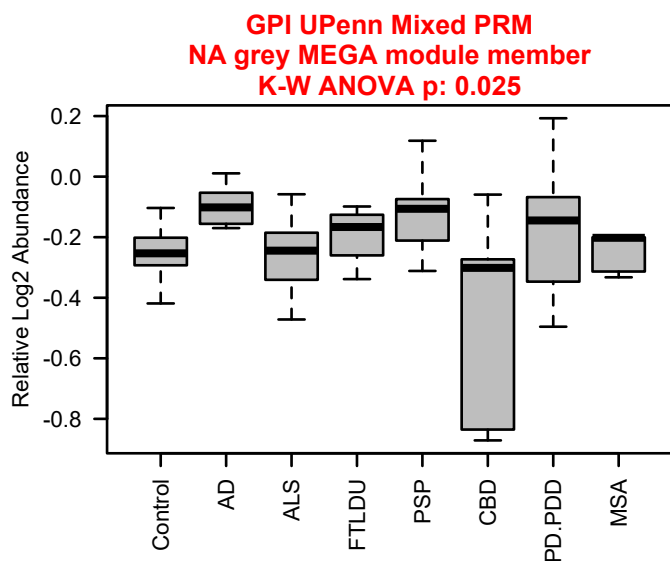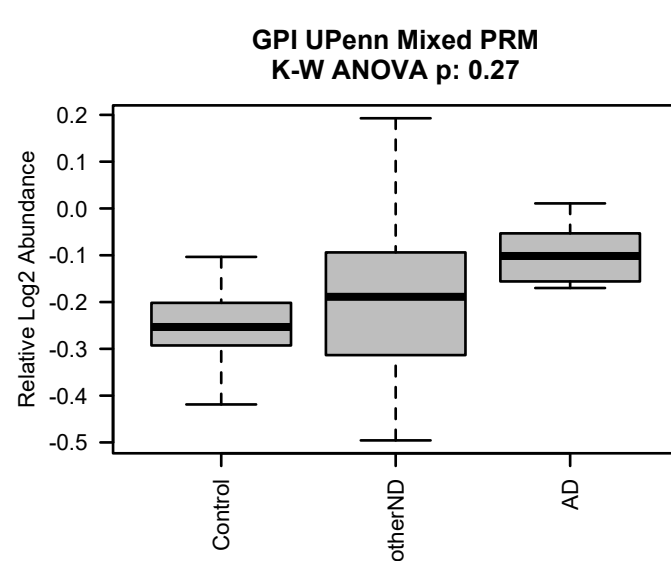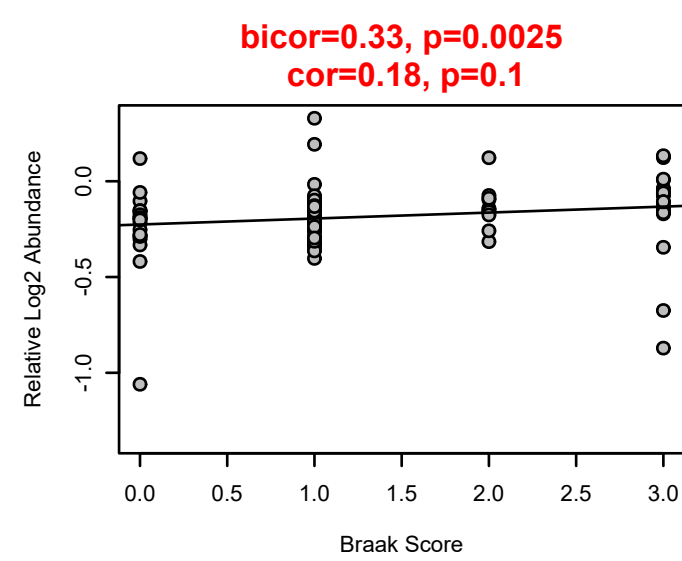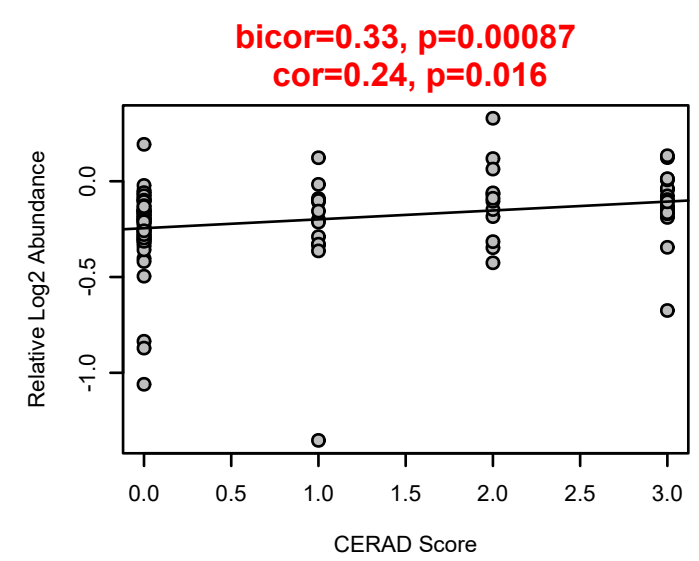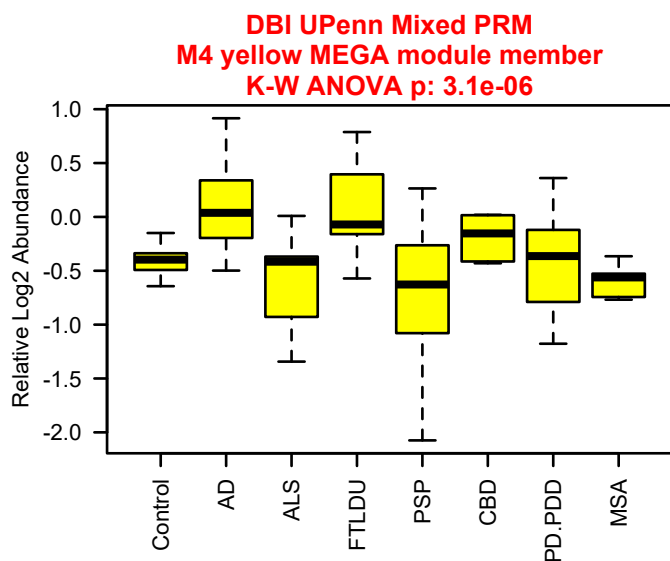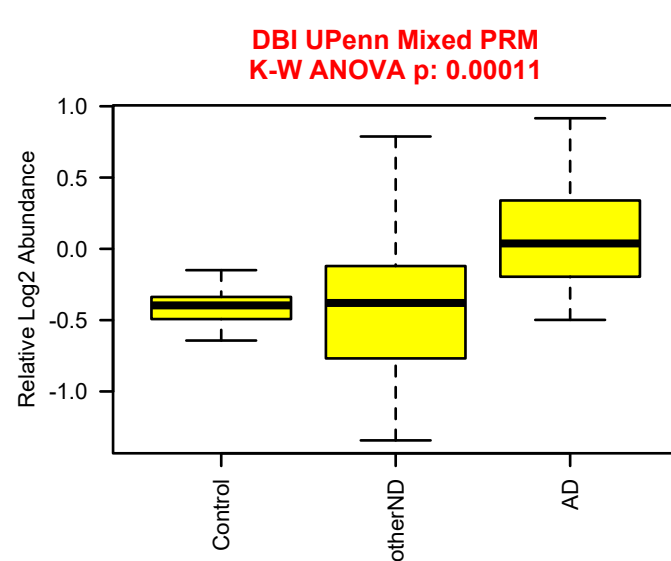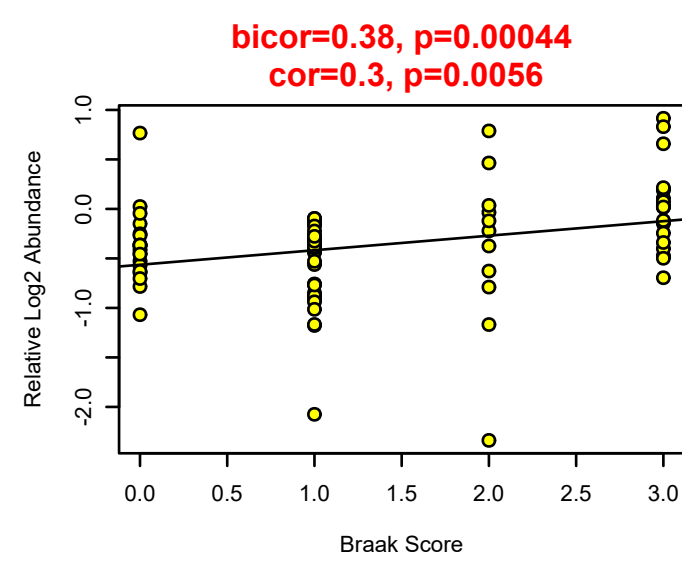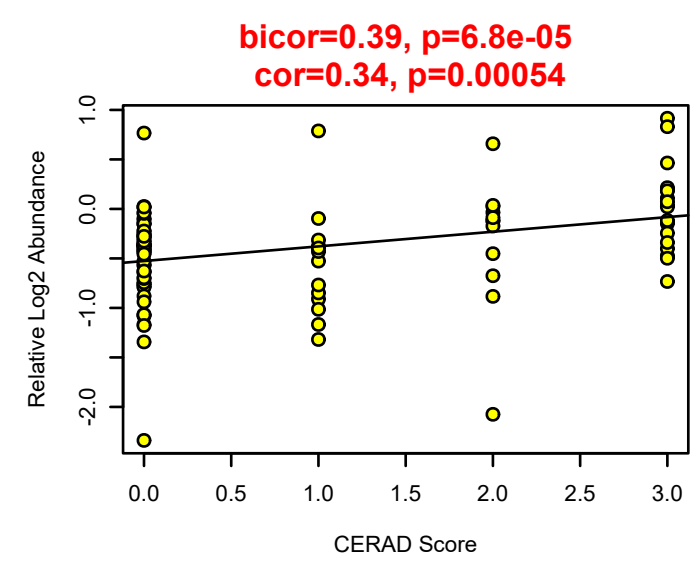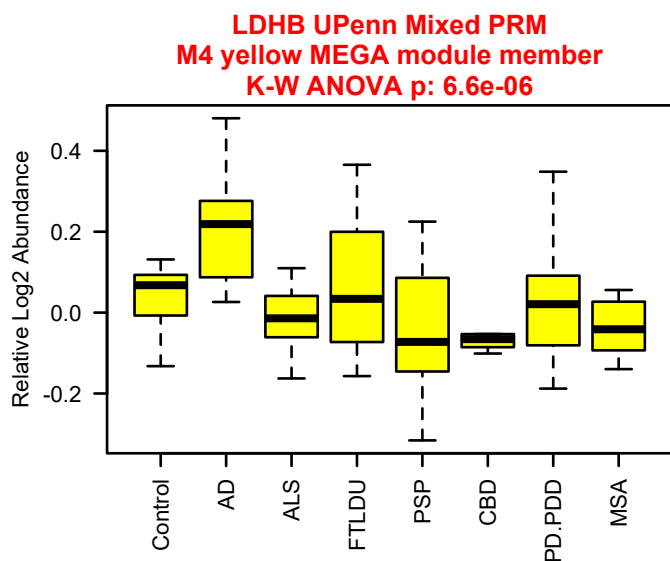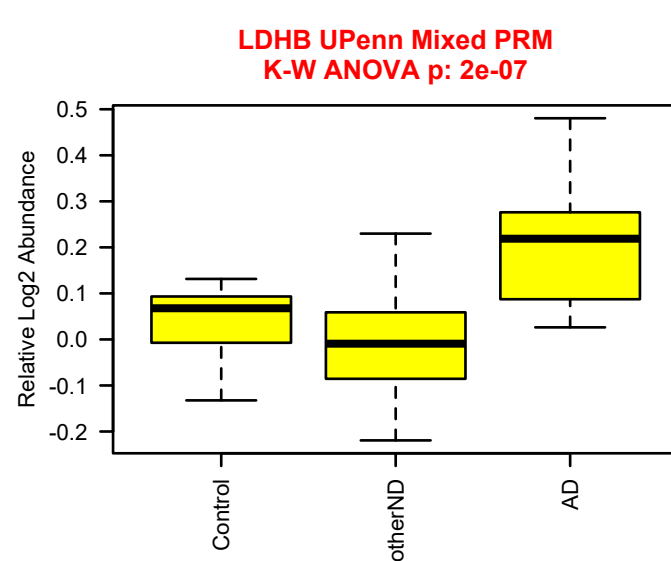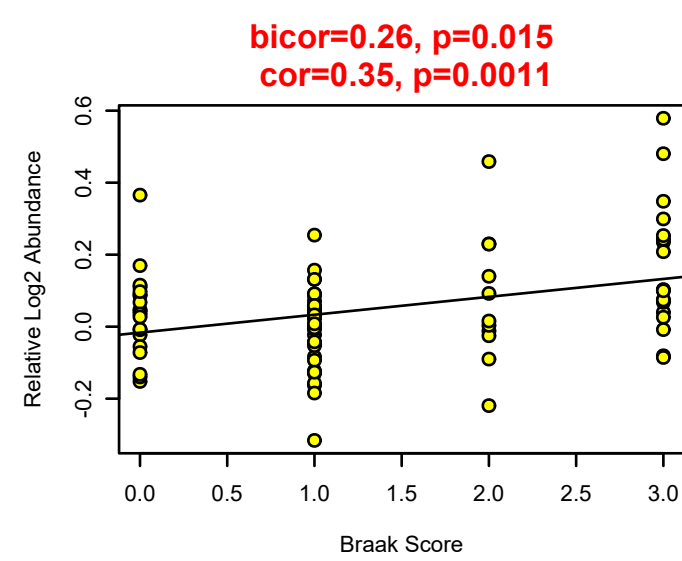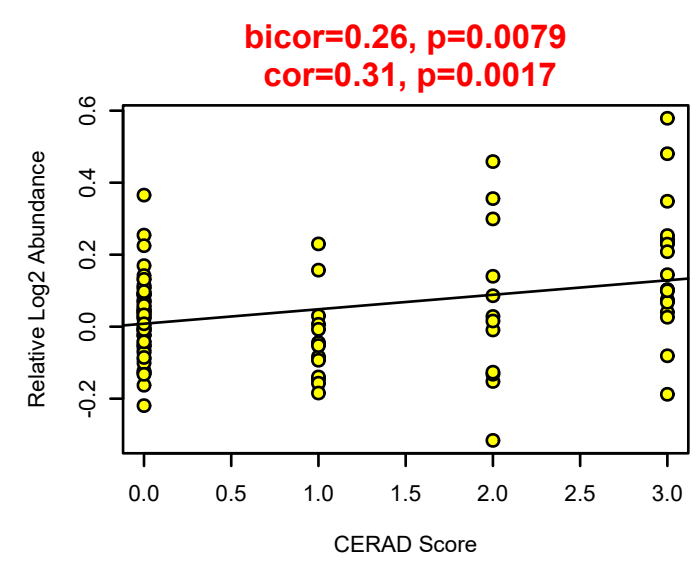

**HSP90AA1 UPenn Mixed PRM**  
**M11 greenyellow MEGA module member**  
**K-W ANOVA p: 0.031**

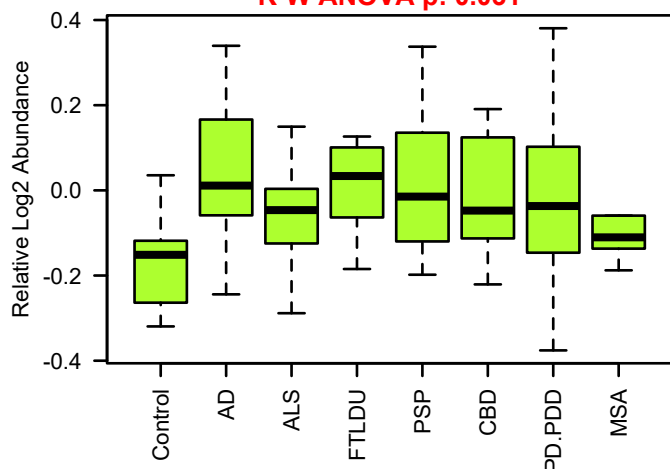

**HSP90AA1 UPenn Mixed PRM**  
**K-W ANOVA p: 0.0011**

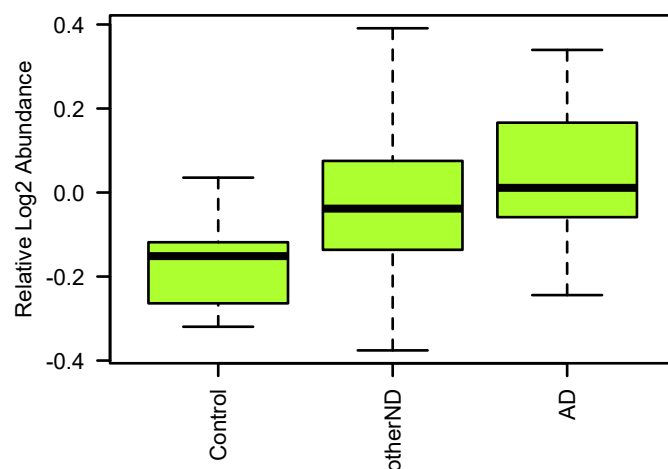

**bicor=0.3, p=0.0051**  
**cor=0.31, p=0.0041**

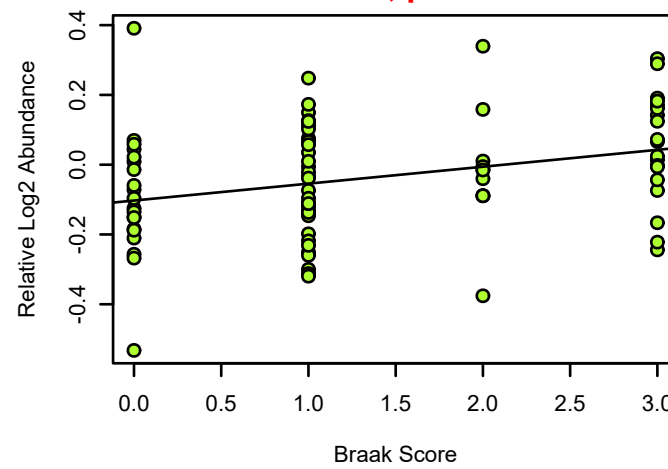

**bicor=0.0047, p=0.96**  
**cor=-0.009, p=0.93**

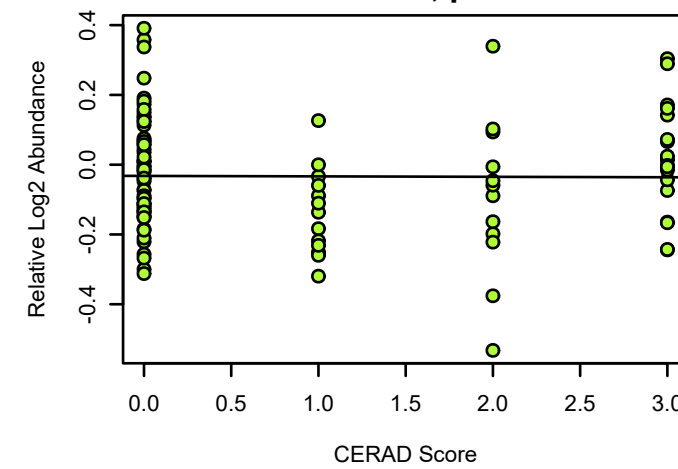

**HSP90AA2P UPenn Mixed PRM**  
**NA grey20 MEGA module member**  
**K-W ANOVA p: 0.0056**

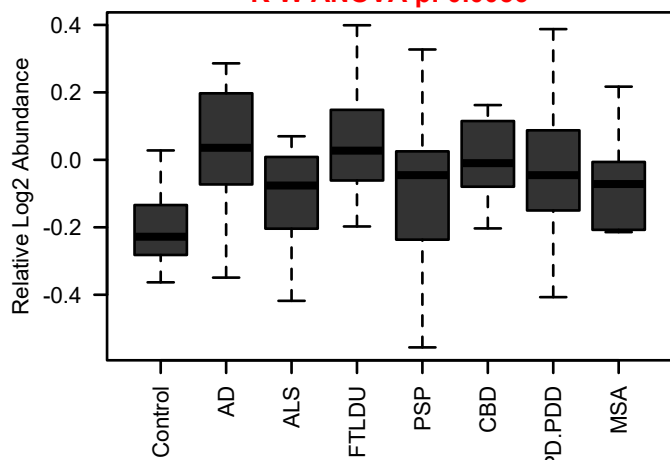

**HSP90AA2P UPenn Mixed PRM**  
**K-W ANOVA p: 0.00061**

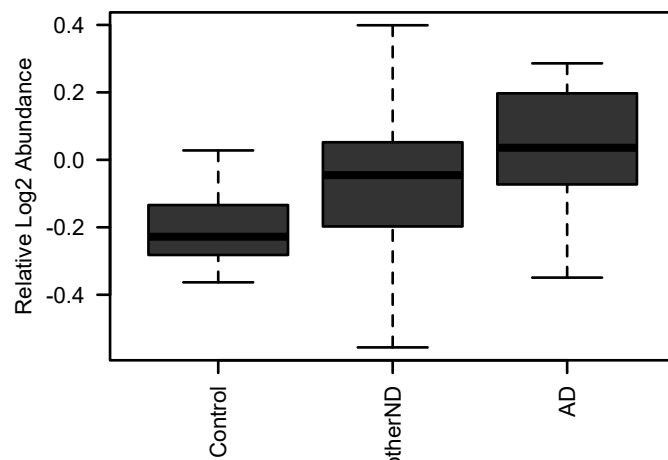

**bicor=0.28, p=0.0091**  
**cor=0.31, p=0.0041**

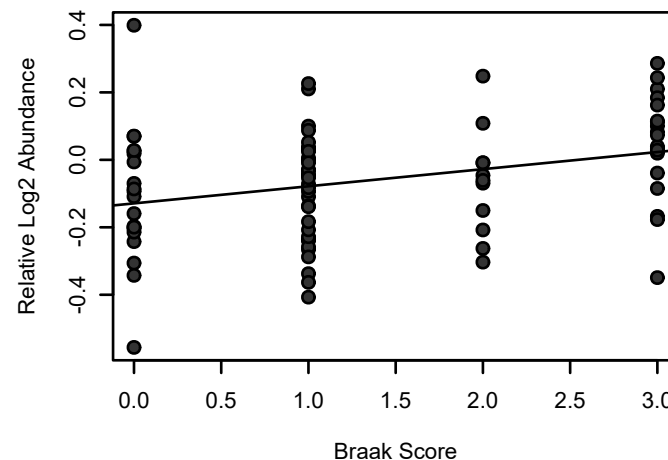

**bicor=0.12, p=0.22**  
**cor=0.11, p=0.28**

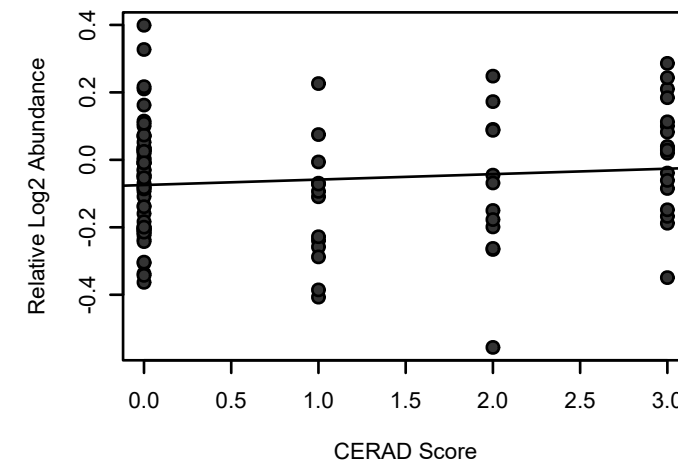

**HSP90AB2P UPenn Mixed PRM**  
**NA grey MEGA module member**  
**K-W ANOVA p: 0.22**

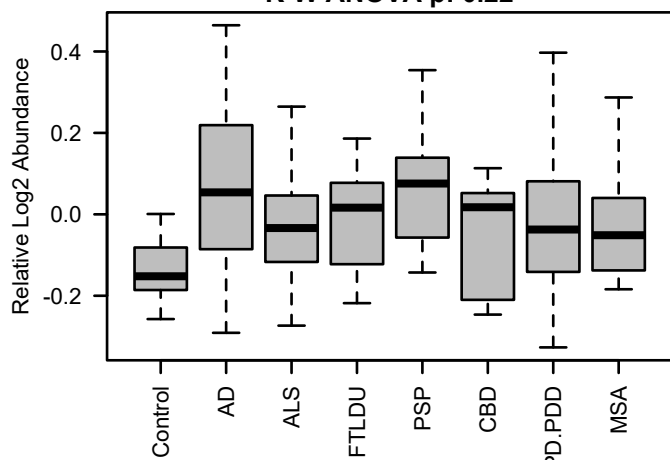

**HSP90AB2P UPenn Mixed PRM**  
**K-W ANOVA p: 0.017**

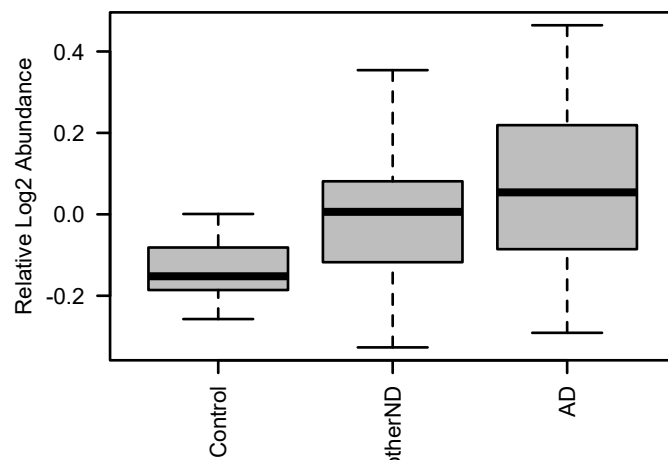

**bicor=0.19, p=0.088**  
**cor=0.23, p=0.035**

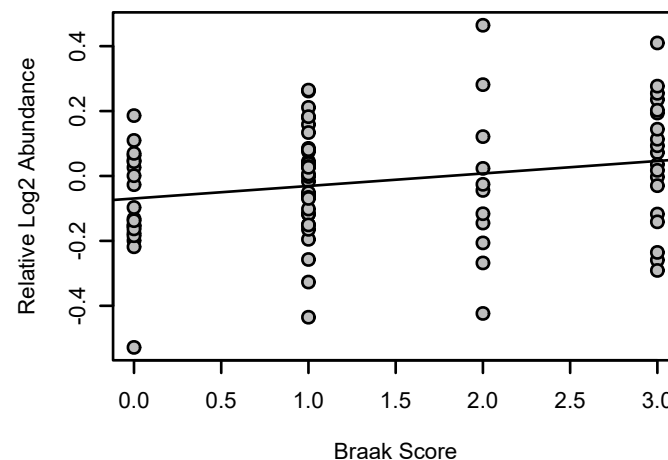

**bicor=0.0026, p=0.98**  
**cor=0.0071, p=0.94**

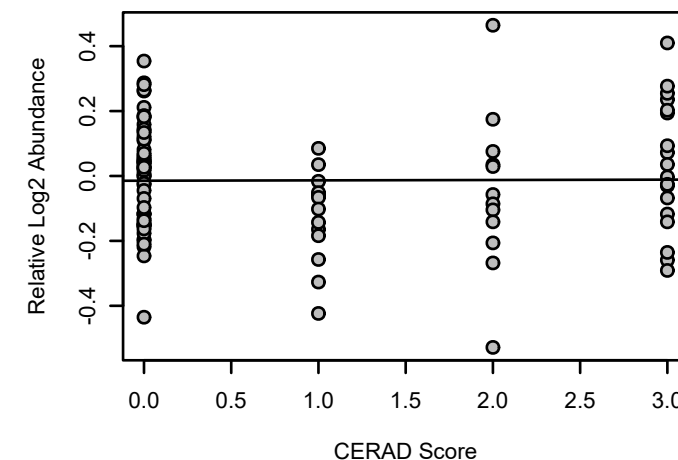

**HSP90AB1 UPenn Mixed PRM**  
**M11 greenyellow MEGA module member**  
**K-W ANOVA p: 0.57**

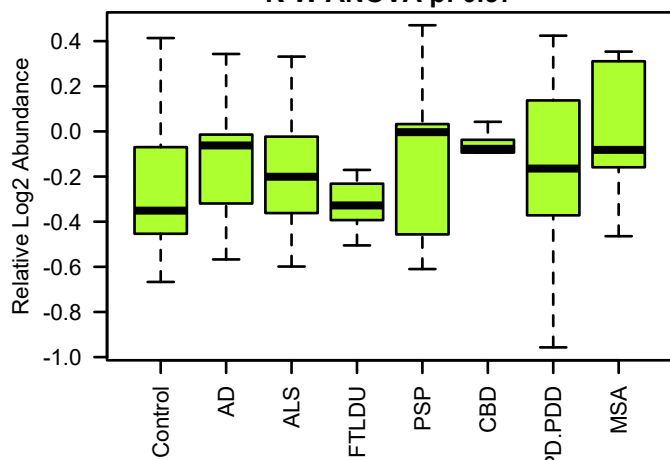

**HSP90AB1 UPenn Mixed PRM**  
**K-W ANOVA p: 0.41**

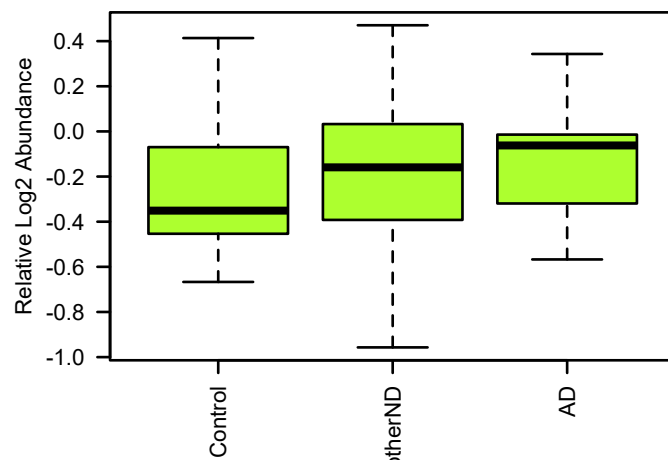

**bicor=0.14, p=0.22**  
**cor=0.13, p=0.24**

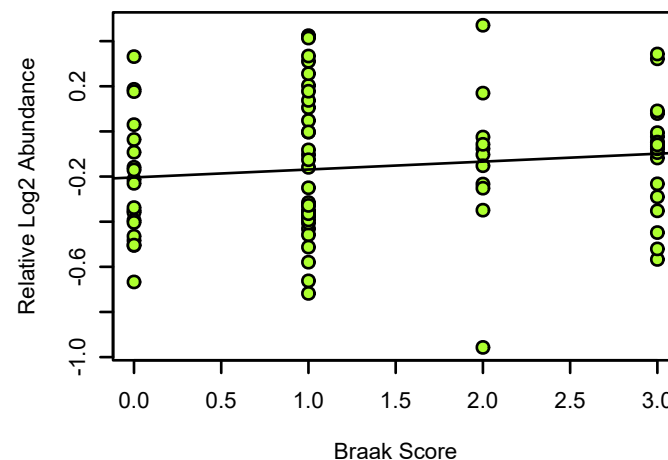

**bicor=-0.0019, p=0.99**  
**cor=-0.0089, p=0.93**

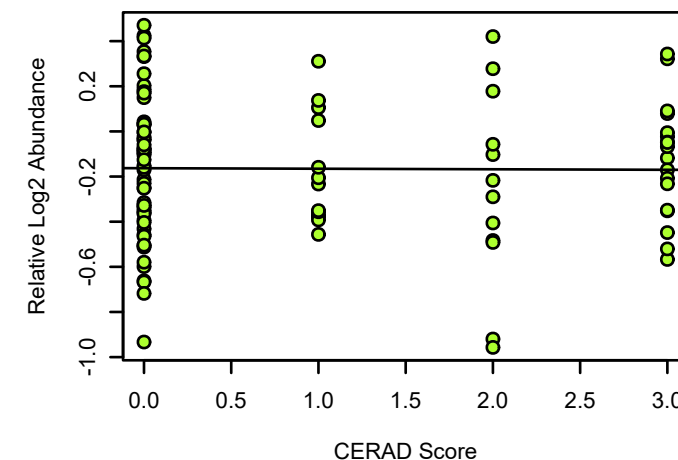

**HSP90AB3P UPenn Mixed PRM**  
**NA grey20 MEGA module member**  
**K-W ANOVA p: 0.0018**

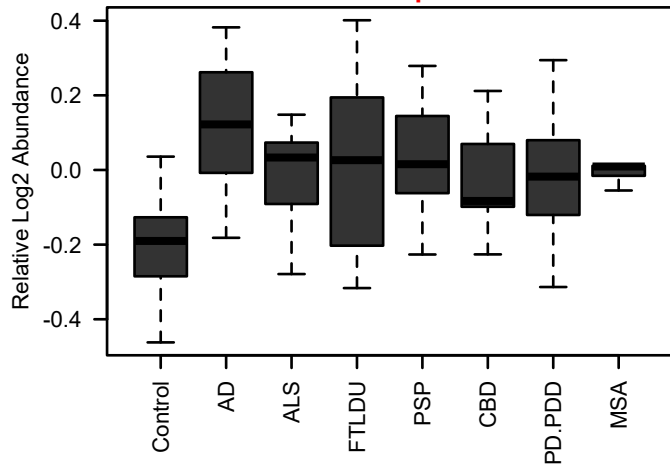

**HSP90AB3P UPenn Mixed PRM**  
**K-W ANOVA p: 1.8e-05**

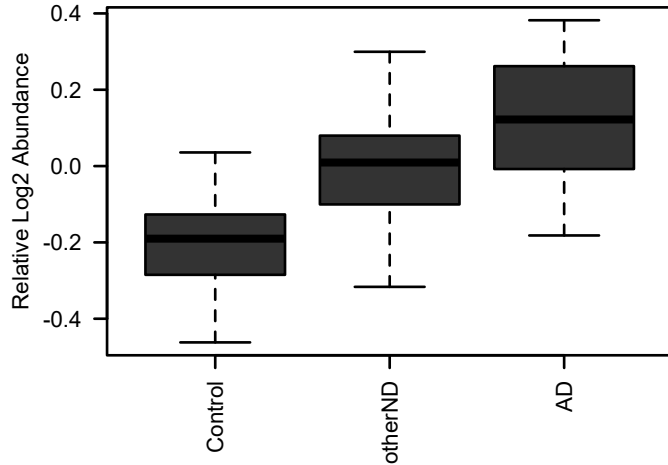

**bicor=0.33, p=0.0019**  
**cor=0.38, p=0.00036**

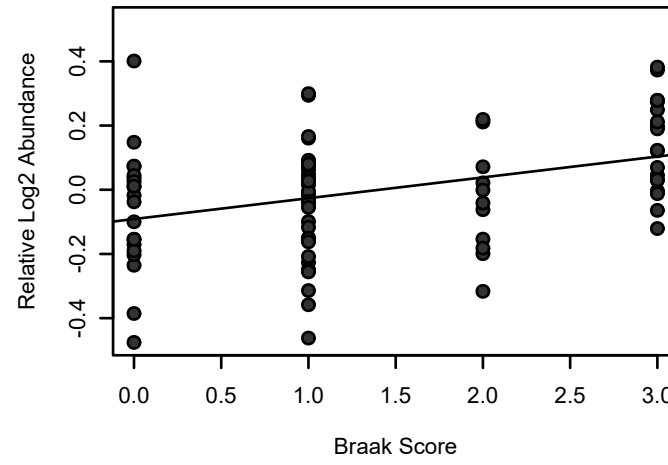

**bicor=0.087, p=0.39**  
**cor=0.078, p=0.44**

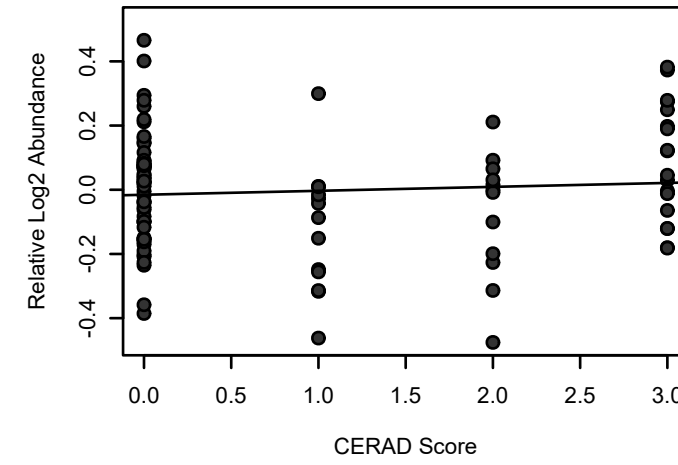

**SYP UPenn Mixed PRM**  
**M1 turquoise MEGA module member**  
**K-W ANOVA p: 3e-04**

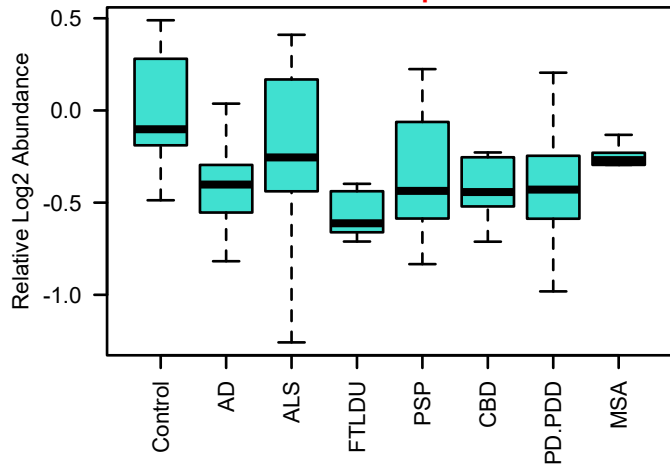

**SYP UPenn Mixed PRM**  
**K-W ANOVA p: 0.00012**

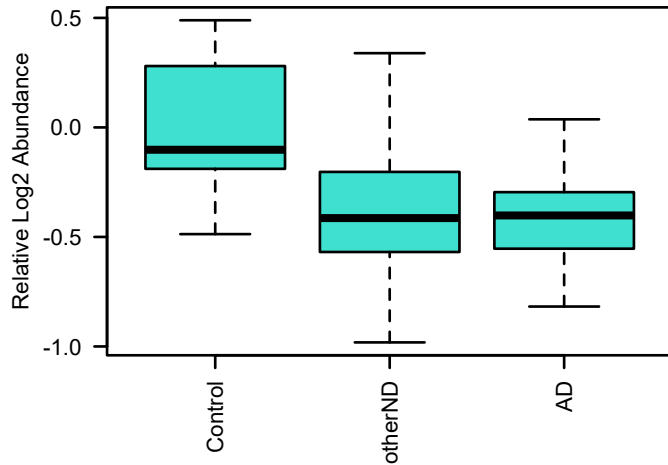

**bicor=-0.22, p=0.044**  
**cor=-0.23, p=0.035**

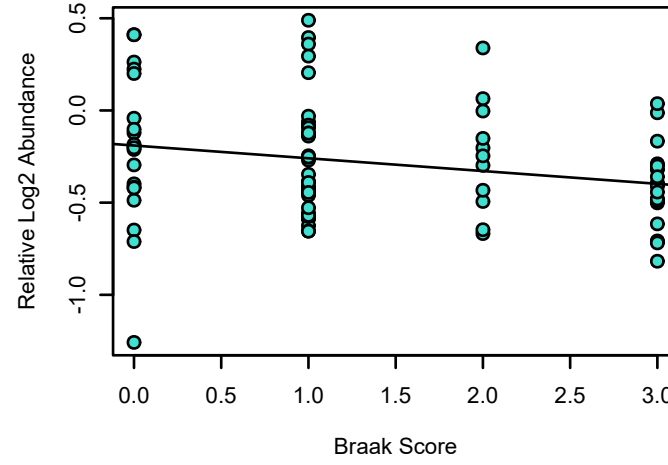

**bicor=-0.16, p=0.11**  
**cor=-0.16, p=0.11**

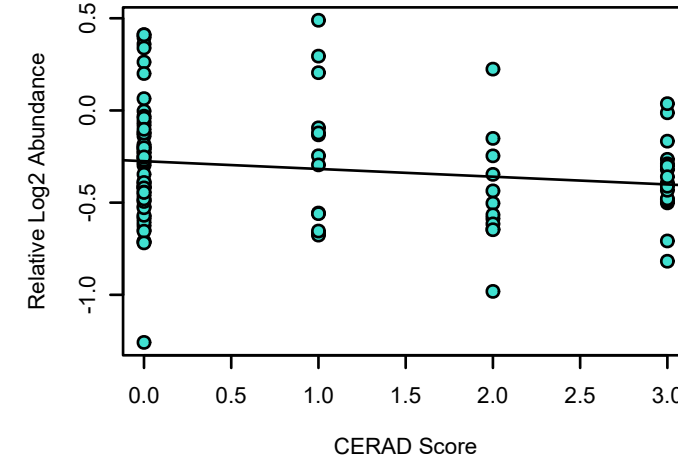

**PDHA2 UPenn Mixed PRM**  
**NA grey20 MEGA module member**  
**K-W ANOVA p: 1.4e-06**

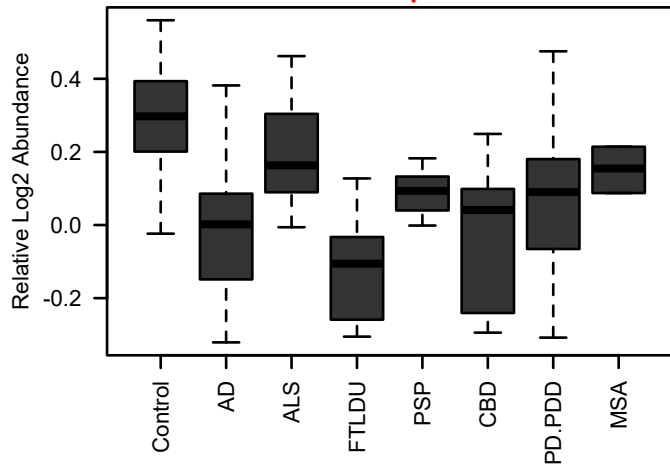

**PDHA2 UPenn Mixed PRM**  
**K-W ANOVA p: 4.4e-05**

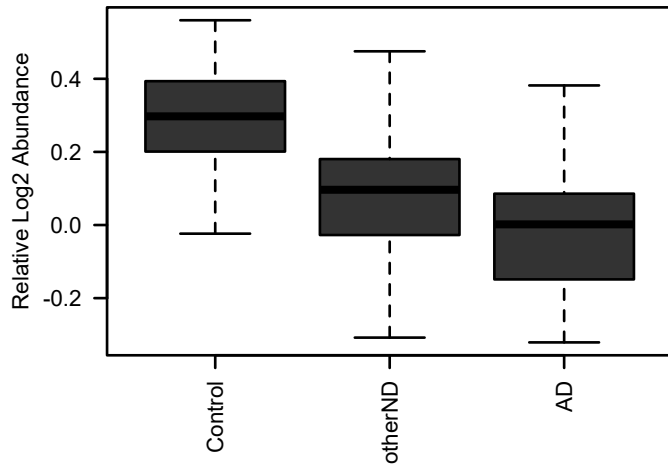

**bicor=-0.34, p=0.0017**  
**cor=-0.33, p=0.0022**

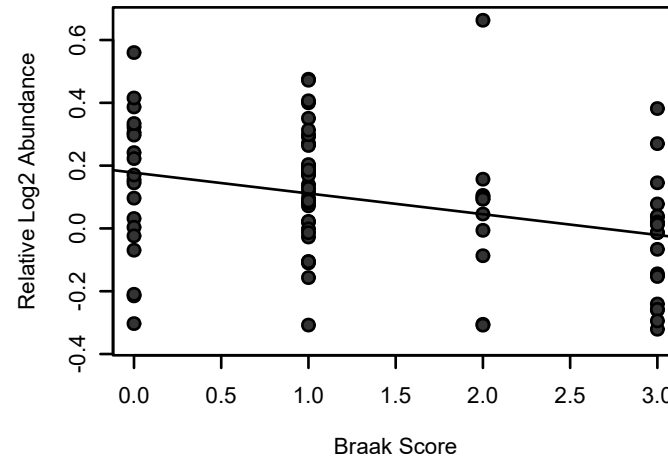

**bicor=-0.2, p=0.041**  
**cor=-0.21, p=0.036**

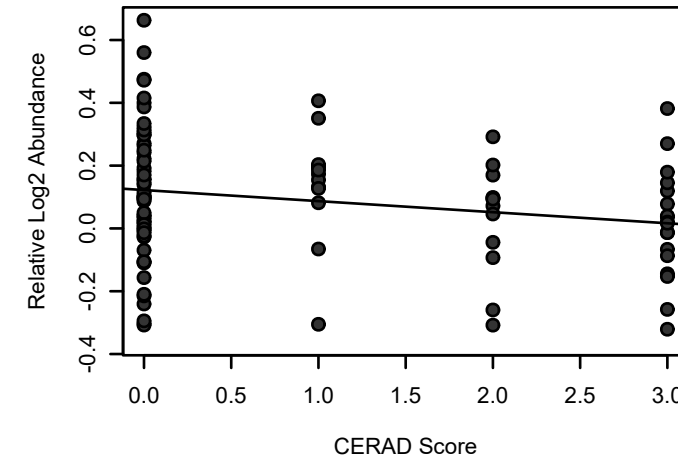

**PDHA1 UPenn Mixed PRM**  
**M3 brown MEGA module member**  
**K-W ANOVA p: 0.00053**

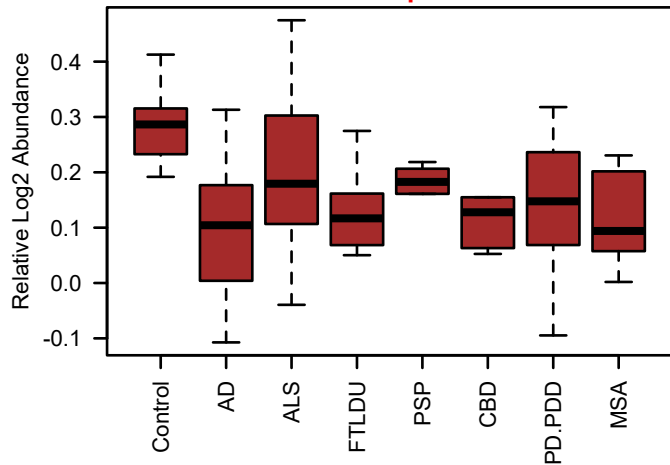

**PDHA1 UPenn Mixed PRM**  
**K-W ANOVA p: 2.1e-05**

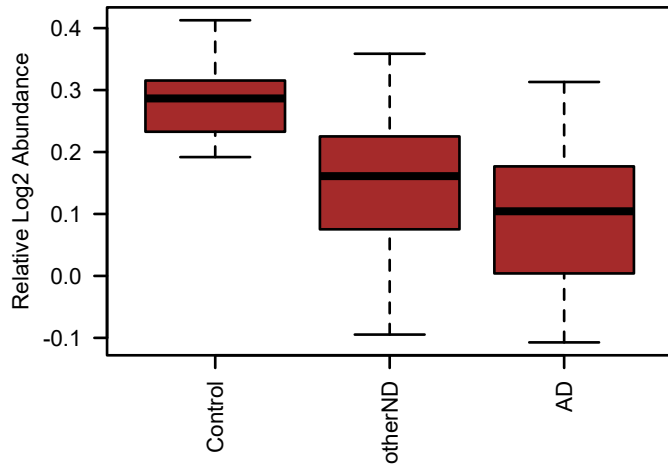

**bicor=-0.35, p=0.0013**  
**cor=-0.35, p=0.0011**

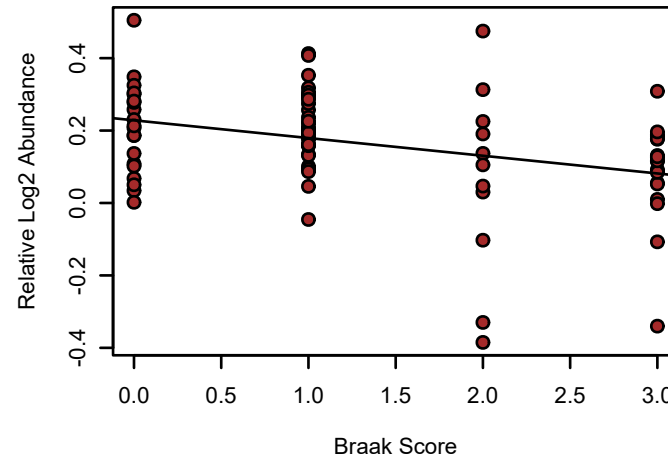

**bicor=-0.36, p=0.00024**  
**cor=-0.3, p=0.0024**

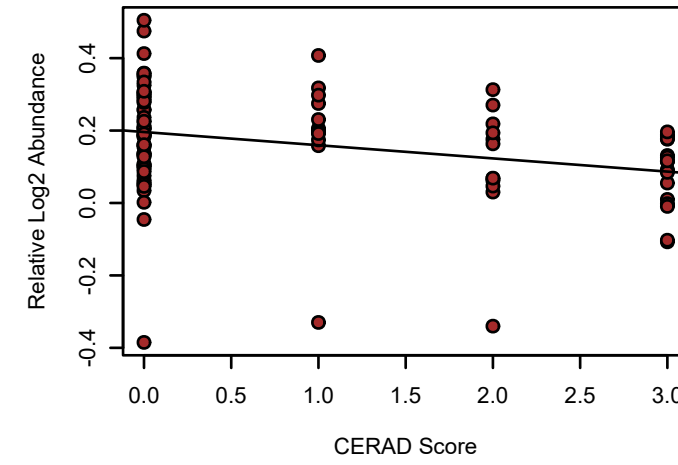



**HPS6 UPenn Mixed PRM**  
NA grey20 MEGA module member  
K-W ANOVA p: 4.2e-08

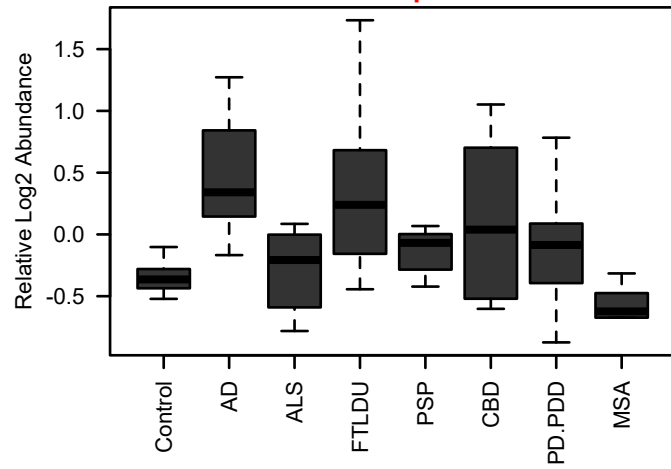

**HPS6 UPenn Mixed PRM**  
K-W ANOVA p: 1.1e-06

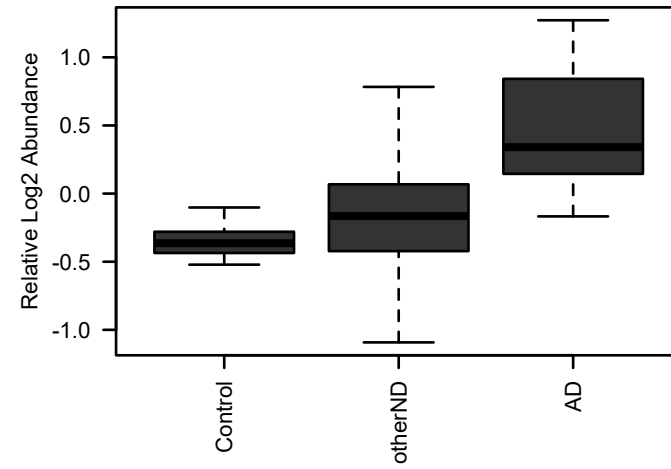

**bicor=0.47, p=6.2e-06**  
**cor=0.47, p=6.5e-06**

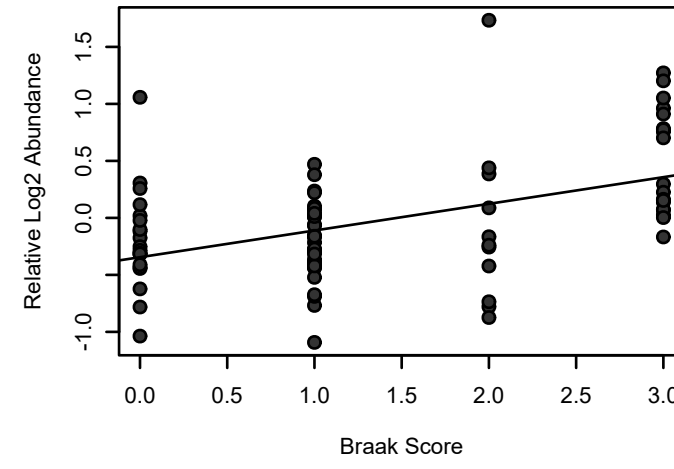

**bicor=0.42, p=1.7e-05**  
**cor=0.39, p=6e-05**

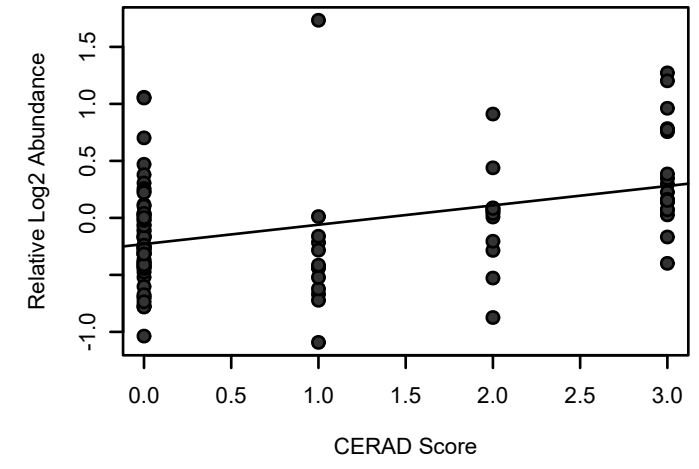

**ANXA5 UPenn Mixed PRM**  
M4 yellow MEGA module member  
K-W ANOVA p: 3.7e-08

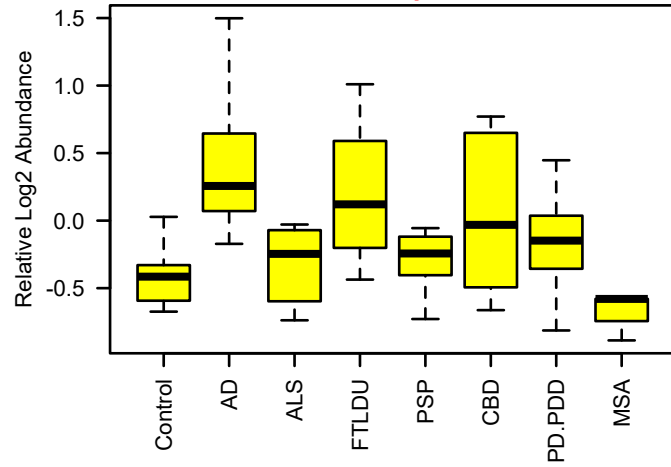

**ANXA5 UPenn Mixed PRM**  
K-W ANOVA p: 1.4e-06

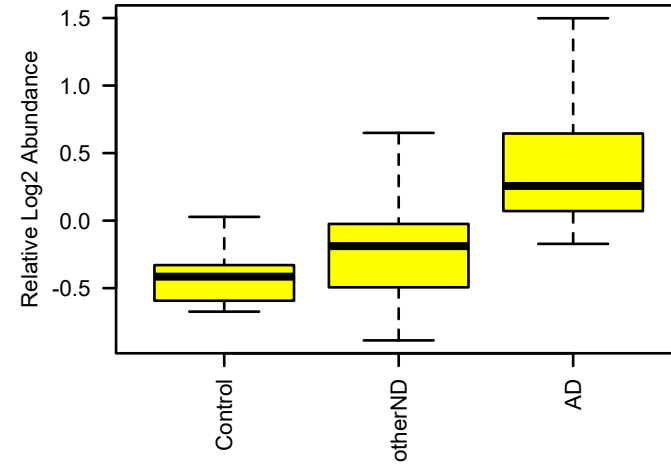

**bicor=0.46, p=9.7e-06**  
**cor=0.47, p=6.5e-06**

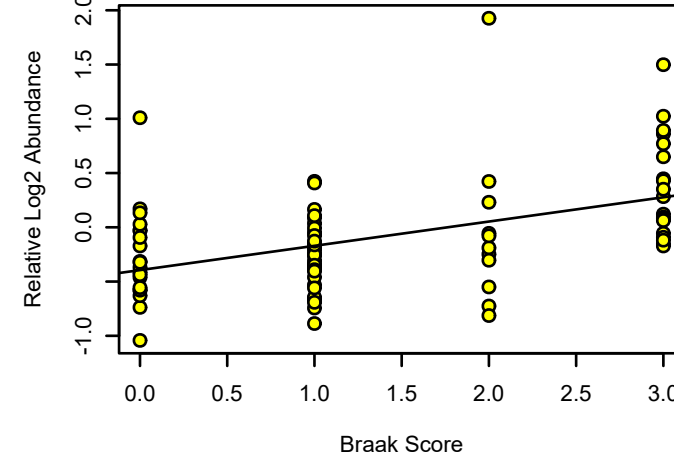

**bicor=0.4, p=4.3e-05**  
**cor=0.37, p=0.00015**

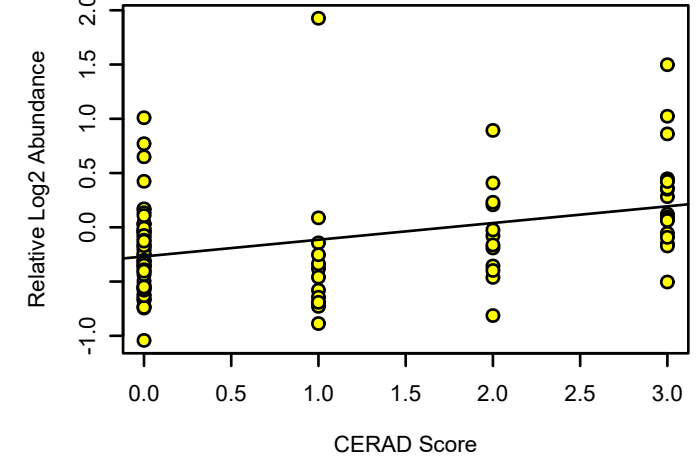

**CLTA UPenn Mixed PRM**  
M6 red MEGA module member  
K-W ANOVA p: 0.014

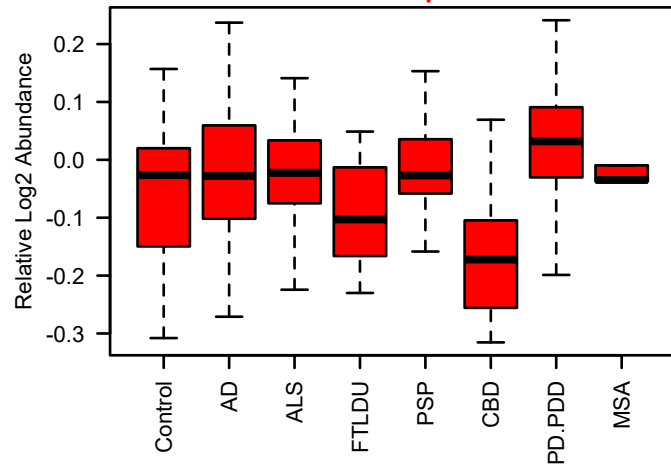

**CLTA UPenn Mixed PRM**  
K-W ANOVA p: 0.51

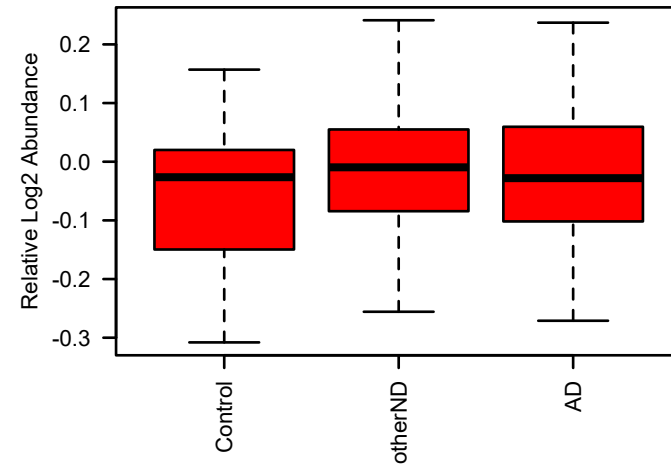

**bicor=0.056, p=0.61**  
**cor=0.054, p=0.63**

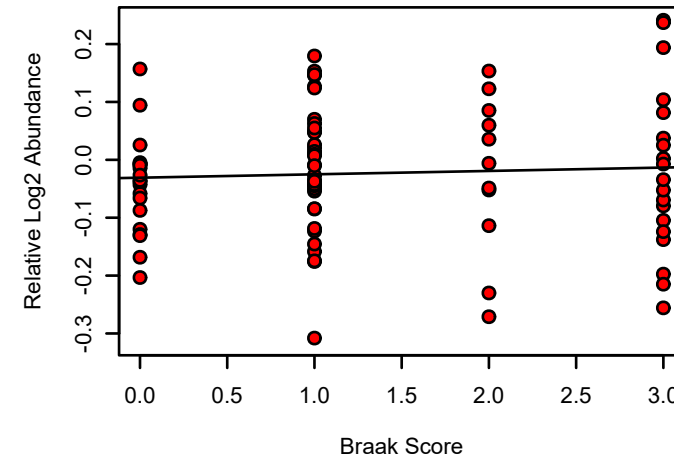

**bicor=0.0069, p=0.95**  
**cor=0.026, p=0.8**

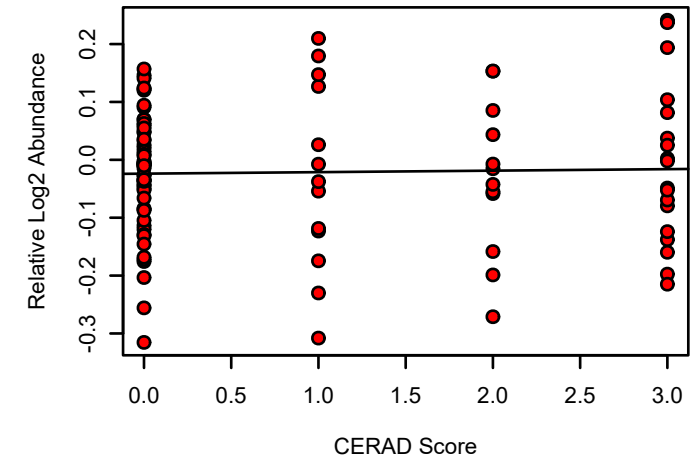

**CNP UPenn Mixed PRM**  
M2 blue MEGA module member  
K-W ANOVA p: 0.0081

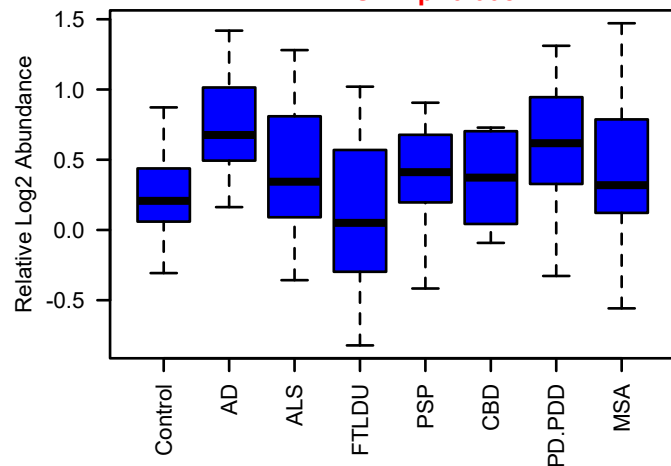

**CNP UPenn Mixed PRM**  
K-W ANOVA p: 0.011

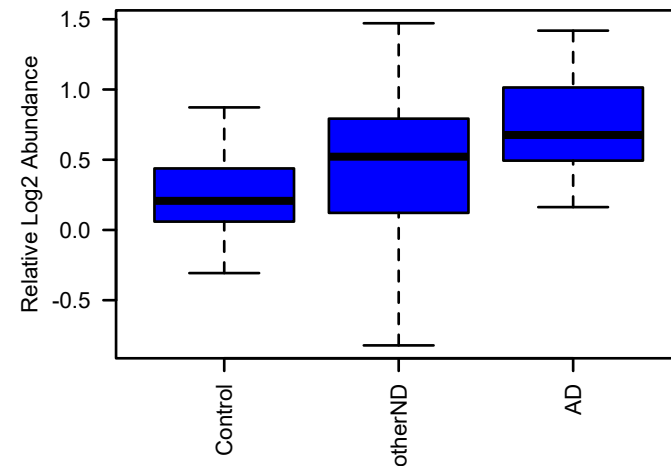

**bicor=0.28, p=0.01**  
**cor=0.31, p=0.0041**

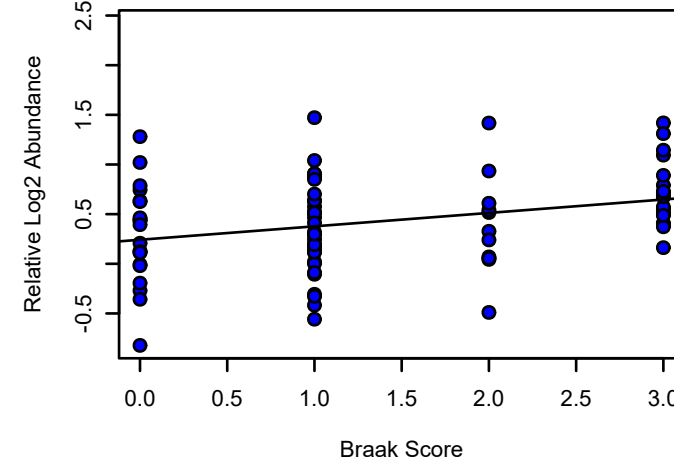

**bicor=0.29, p=0.0036**  
**cor=0.29, p=0.0034**

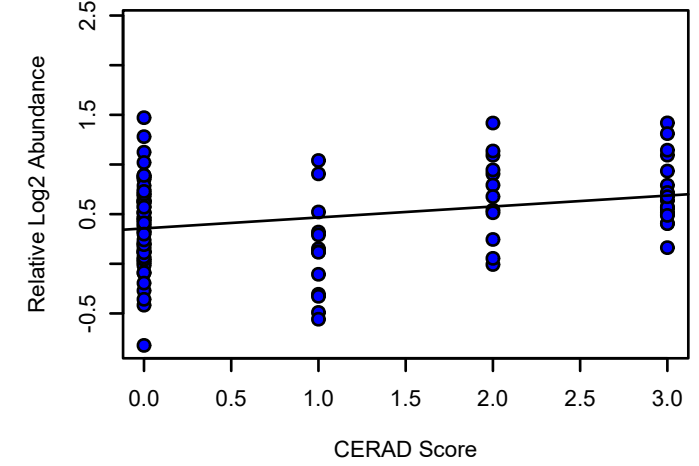

**DLD UPenn Mixed PRM**  
M3 brown MEGA module member  
K-W ANOVA p: 0.0056

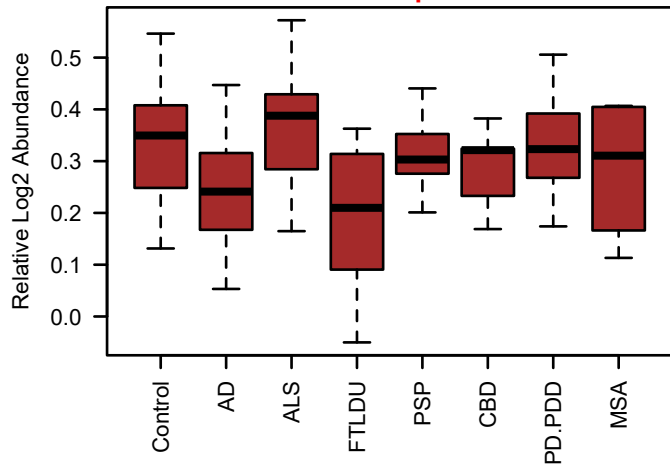

**DLD UPenn Mixed PRM**  
K-W ANOVA p: 0.061

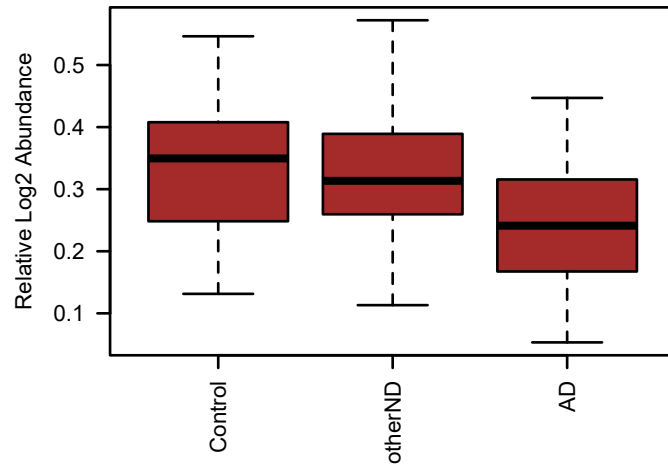

**bicor=-0.21, p=0.054**  
**cor=-0.21, p=0.055**

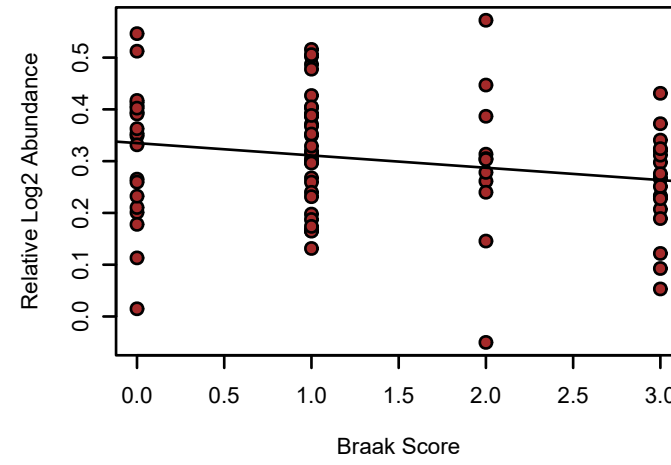

**bicor=-0.18, p=0.07**  
**cor=-0.18, p=0.073**

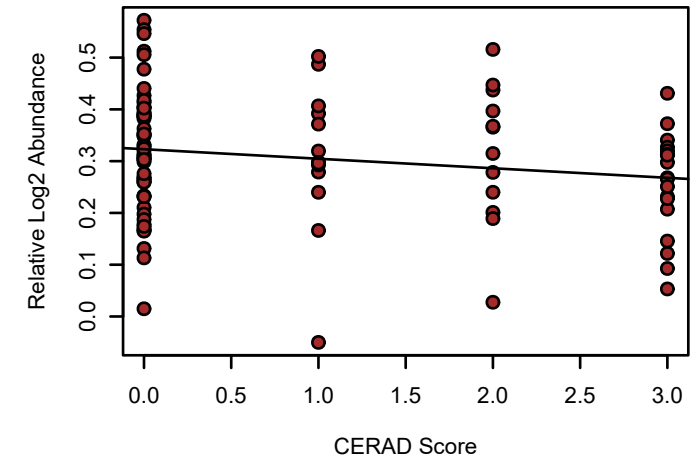

**DLAT UPenn Mixed PRM**  
M3 brown MEGA module member  
K-W ANOVA p: 0.13

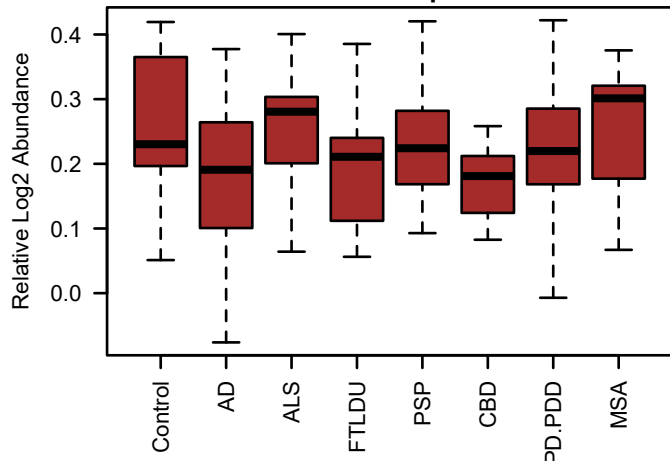

**DLAT UPenn Mixed PRM**  
K-W ANOVA p: 0.048

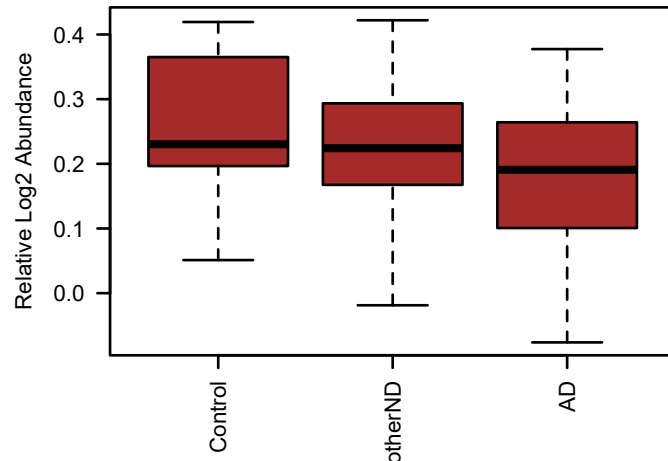

**bicor=-0.22, p=0.048**  
**cor=-0.24, p=0.028**

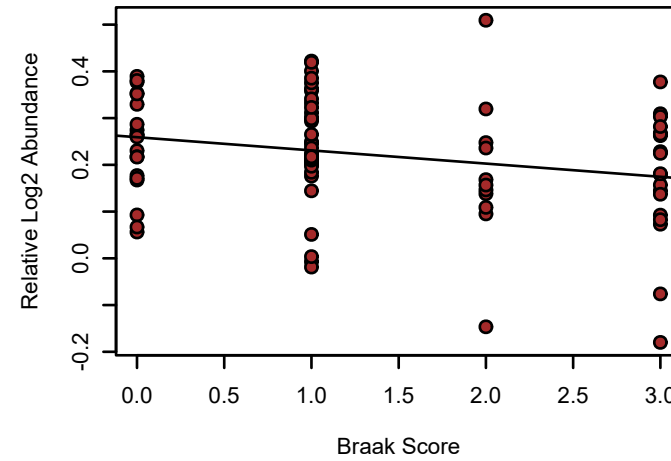

**bicor=-0.16, p=0.12**  
**cor=-0.18, p=0.073**

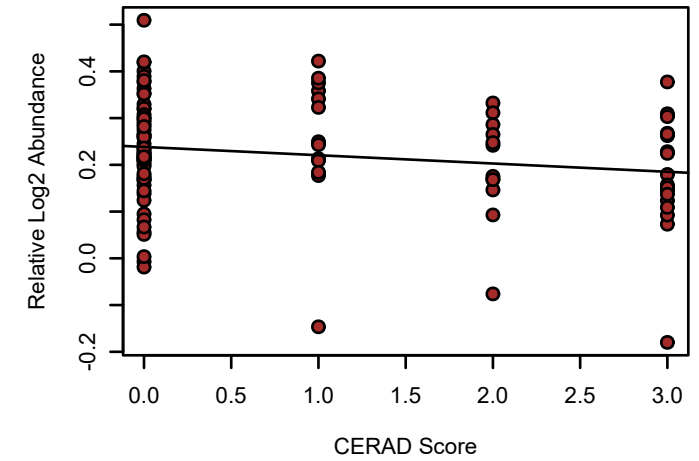

**COX5B UPenn Mixed PRM**  
M3 brown MEGA module member  
K-W ANOVA p: 0.18

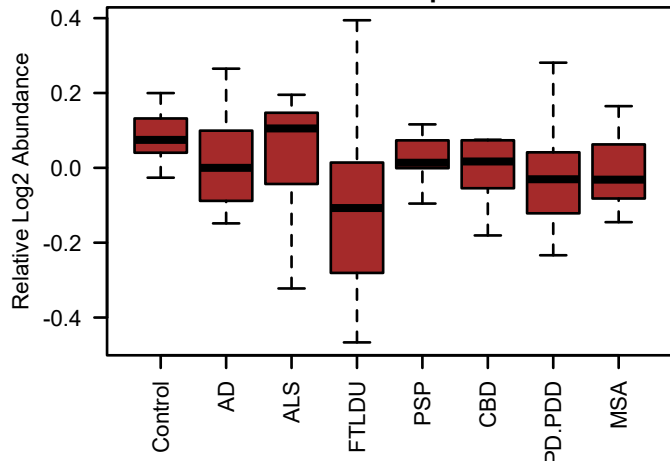

**COX5B UPenn Mixed PRM**  
K-W ANOVA p: 0.1

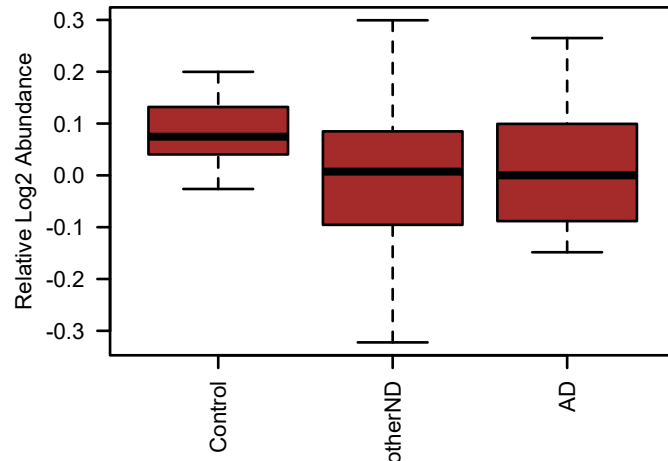

**bicor=-0.14, p=0.2**  
**cor=-0.14, p=0.2**

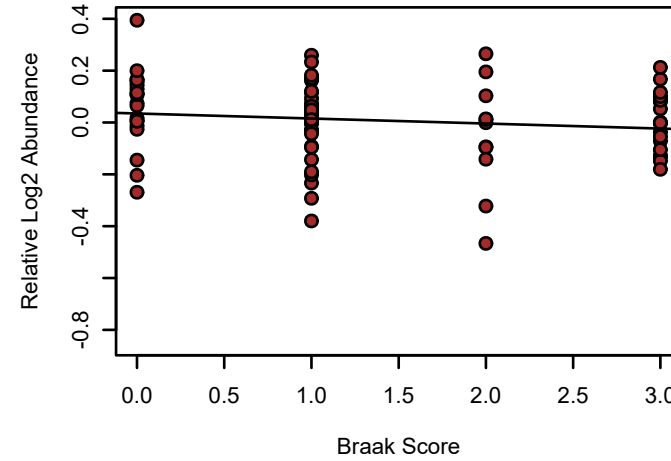

**bicor=-0.13, p=0.2**  
**cor=-0.096, p=0.34**

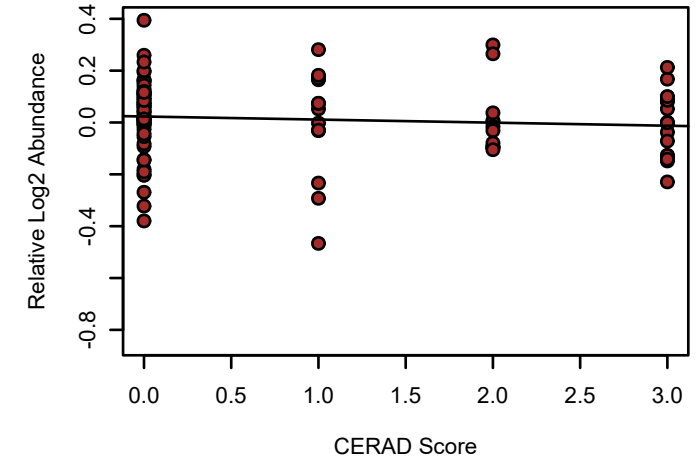

**CHGA UPenn Mixed PRM**  
NA grey MEGA module member  
K-W ANOVA p: 0.00092

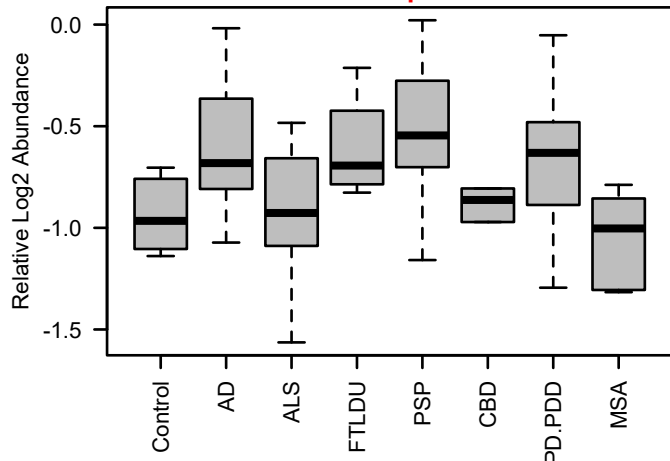

**CHGA UPenn Mixed PRM**  
K-W ANOVA p: 0.011

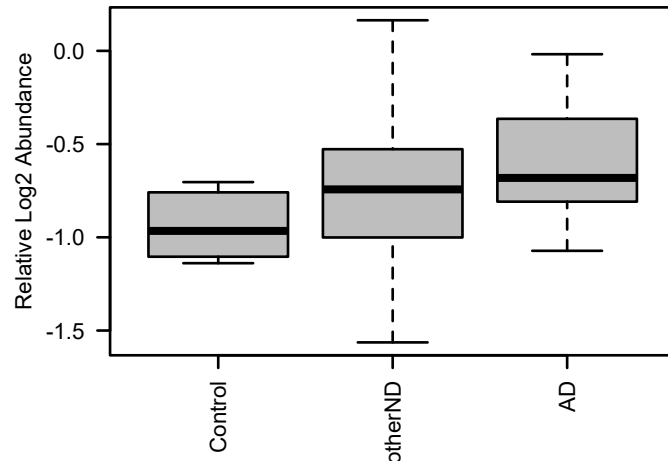

**bicor=0.28, p=0.01**  
**cor=0.28, p=0.0099**

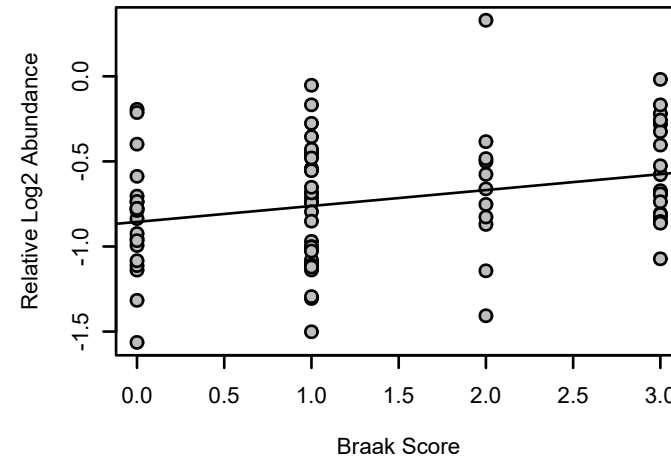

**bicor=0.28, p=0.0054**  
**cor=0.28, p=0.0048**

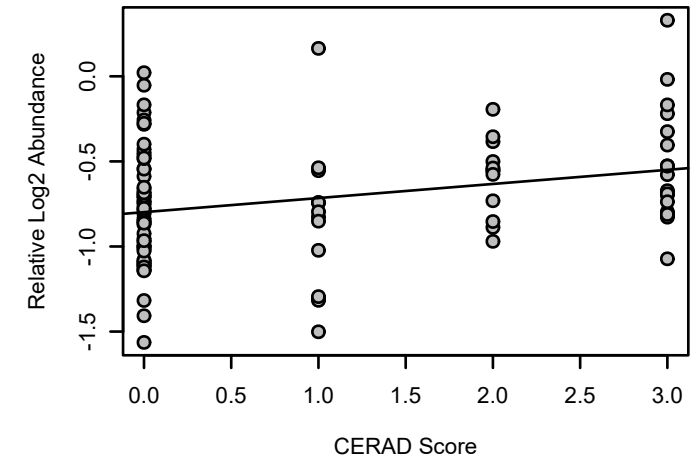

**ESD UPenn Mixed PRM**  
**M4 yellow MEGA module member**  
**K-W ANOVA p: 0.29**

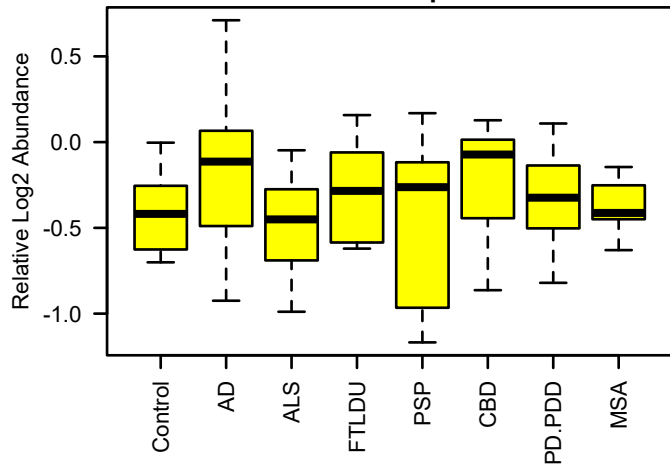

**ESD UPenn Mixed PRM**  
**K-W ANOVA p: 0.41**

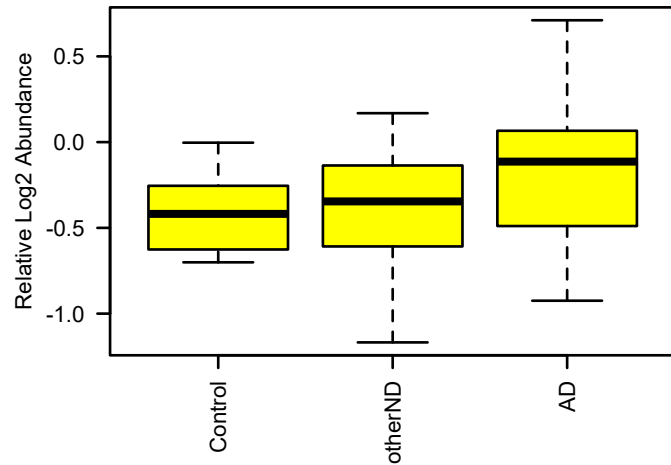

**bicor=0.15, p=0.16**  
**cor=0.11, p=0.32**

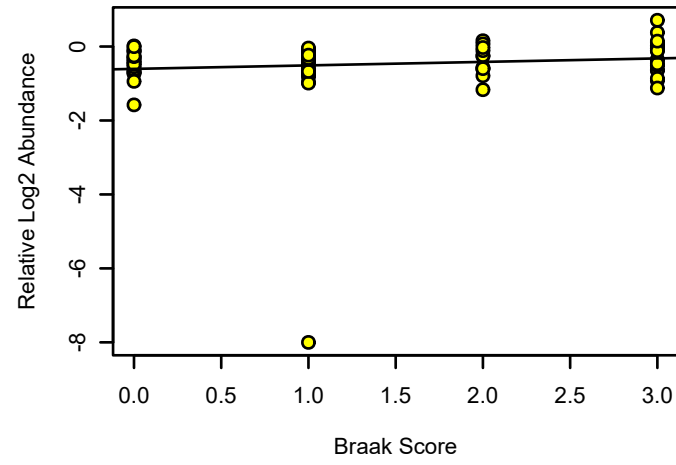

**bicor=0.28, p=0.0041**  
**cor=0.19, p=0.058**

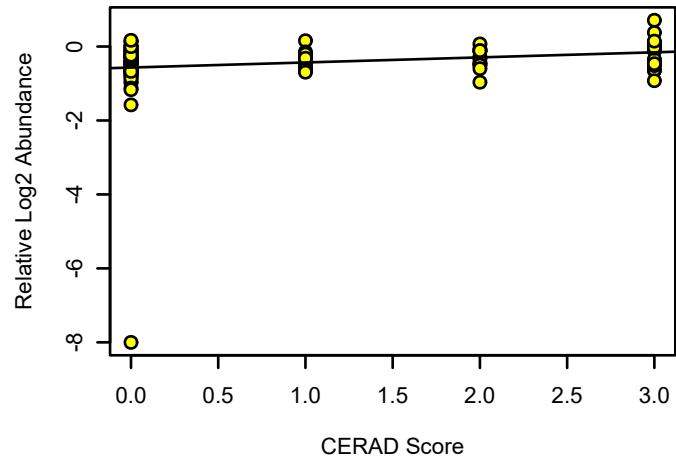

**HSPD1 UPenn Mixed PRM**  
**M3 brown MEGA module member**  
**K-W ANOVA p: 0.004**

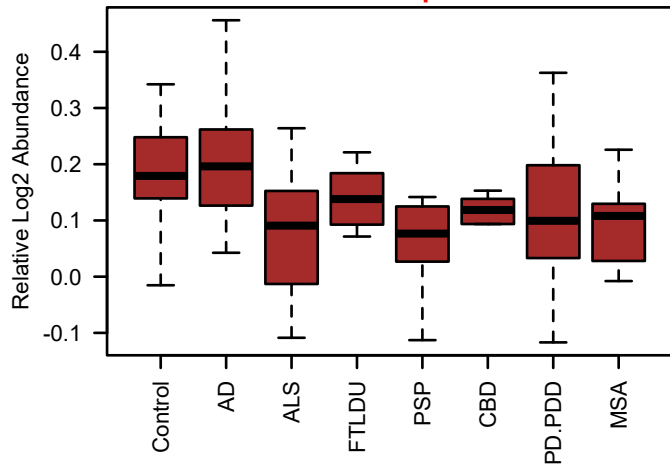

**HSPD1 UPenn Mixed PRM**  
**K-W ANOVA p: 0.00013**

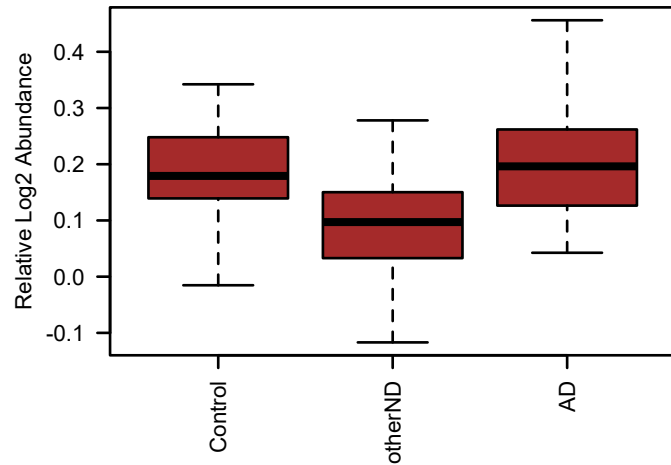

**bicor=0.13, p=0.23**  
**cor=0.14, p=0.2**

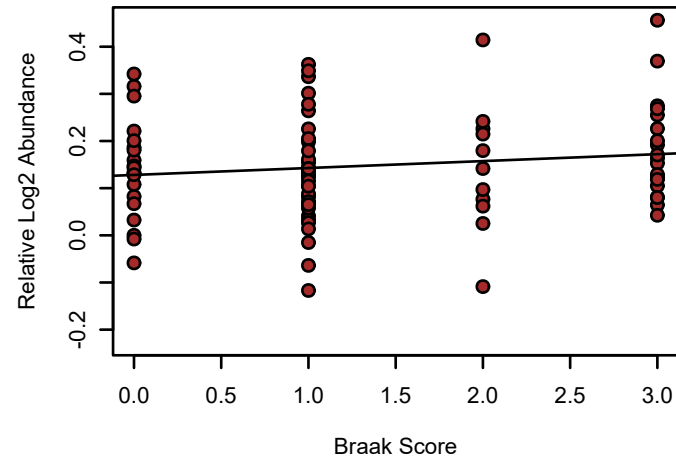

**bicor=0.12, p=0.24**  
**cor=0.14, p=0.16**

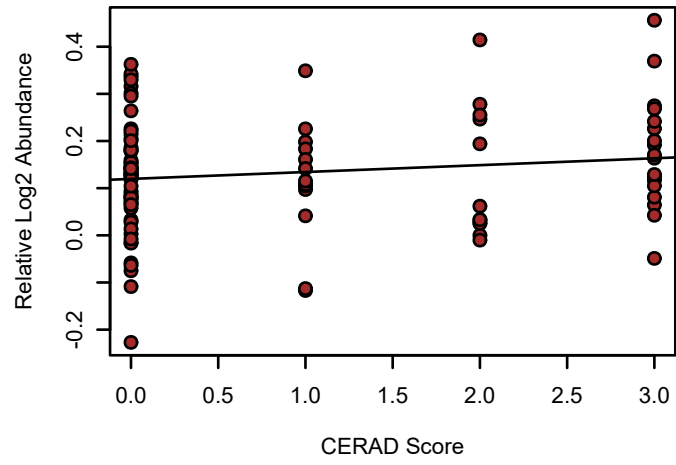

**PDHB UPenn Mixed PRM**  
**M3 brown MEGA module member**  
**K-W ANOVA p: 0.0019**

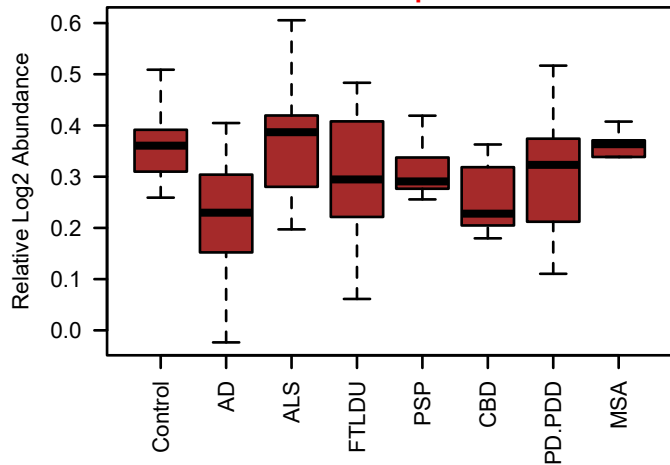

**PDHB UPenn Mixed PRM**  
**K-W ANOVA p: 2e-04**

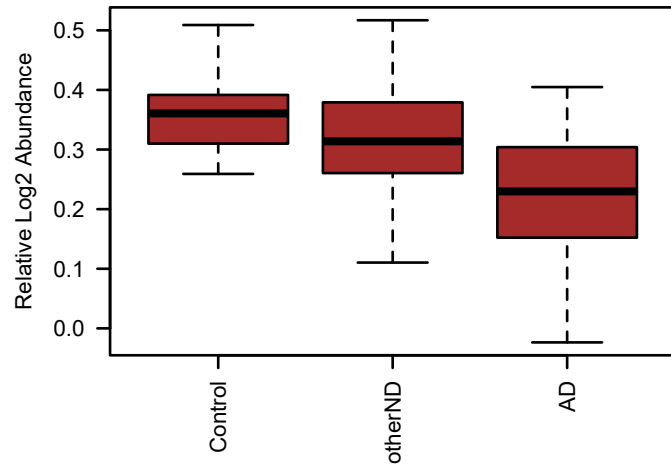

**bicor=-0.36, p=0.00074**  
**cor=-0.39, p=0.00025**

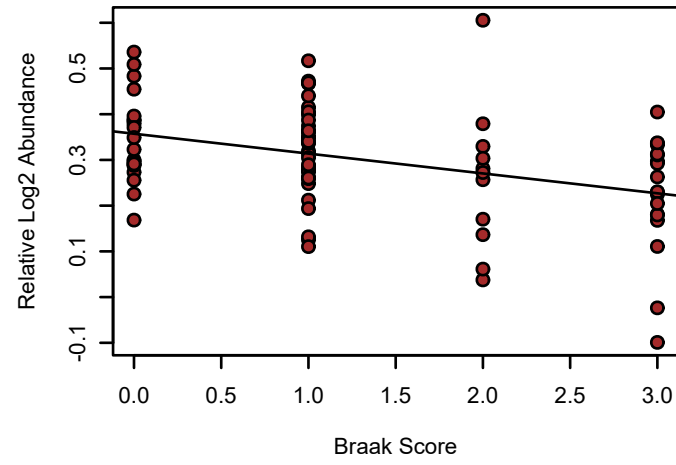

**bicor=-0.29, p=0.0036**  
**cor=-0.3, p=0.0024**

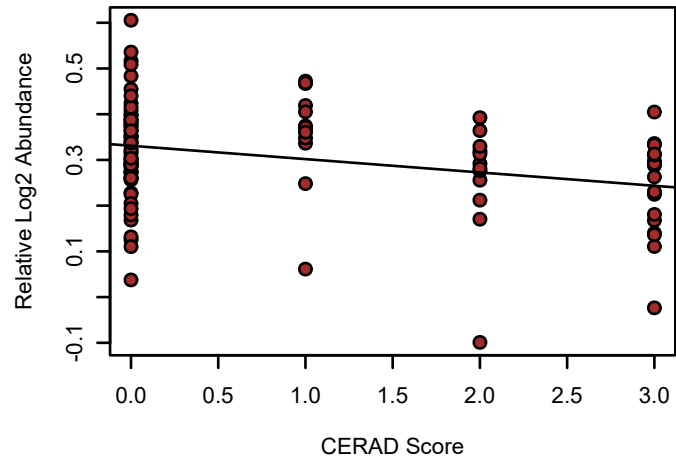

**SLC25A4 UPenn Mixed PRM**  
**M3 brown MEGA module member**  
**K-W ANOVA p: 0.5**

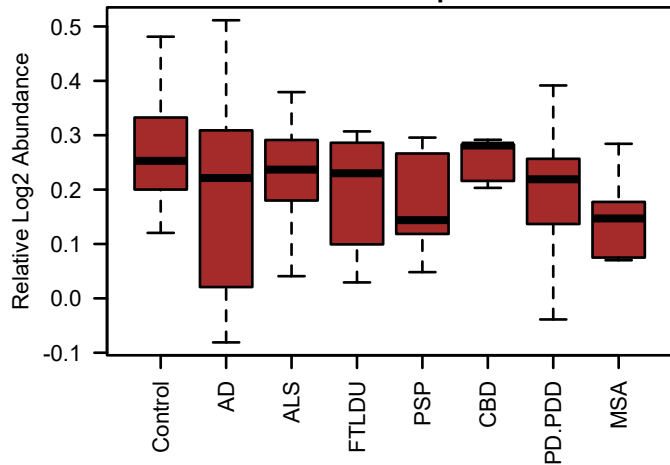

**SLC25A4 UPenn Mixed PRM**  
**K-W ANOVA p: 0.15**

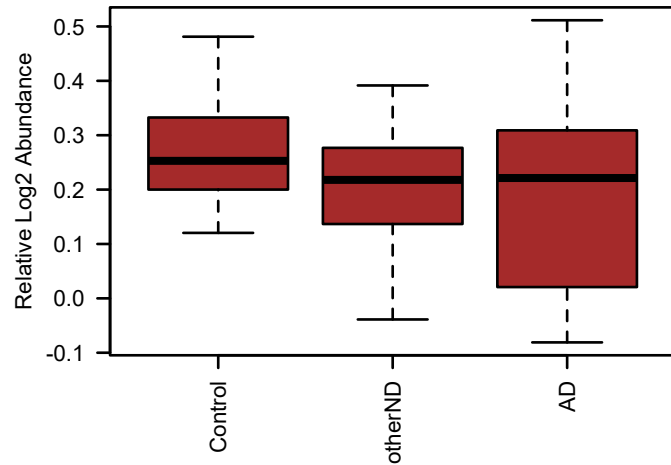

**bicor=-0.092, p=0.41**  
**cor=-0.16, p=0.15**

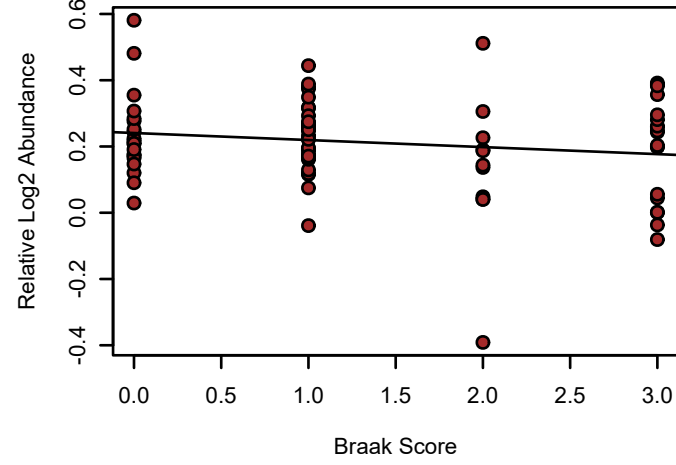

**bicor=-0.17, p=0.095**  
**cor=-0.18, p=0.073**

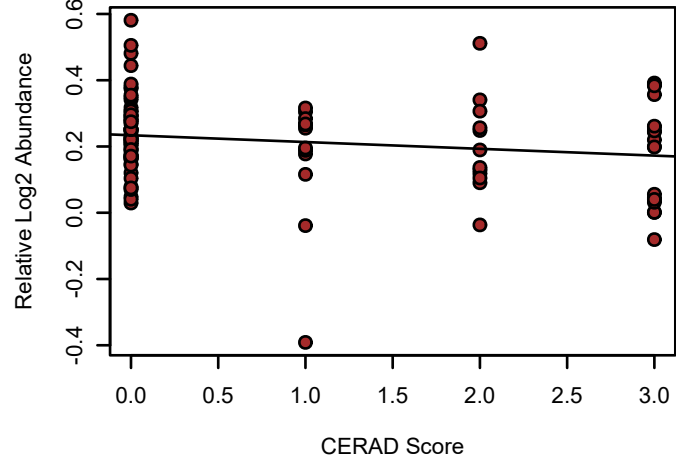



**SLC25A6 UPenn Mixed PRM**  
M3 brown MEGA module member  
K-W ANOVA p: 0.066

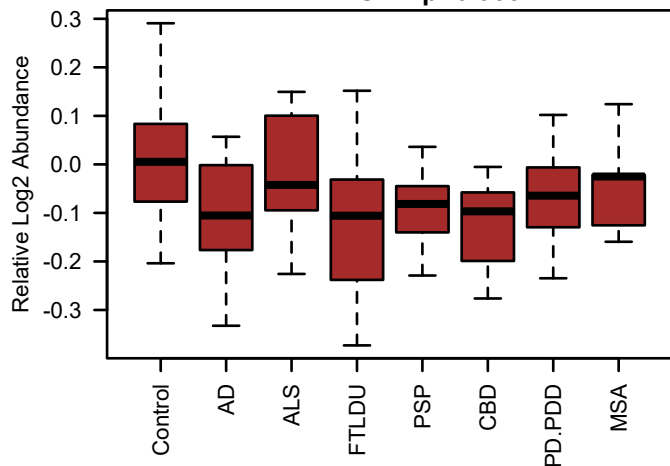

**SLC25A6 UPenn Mixed PRM**  
K-W ANOVA p: 0.021

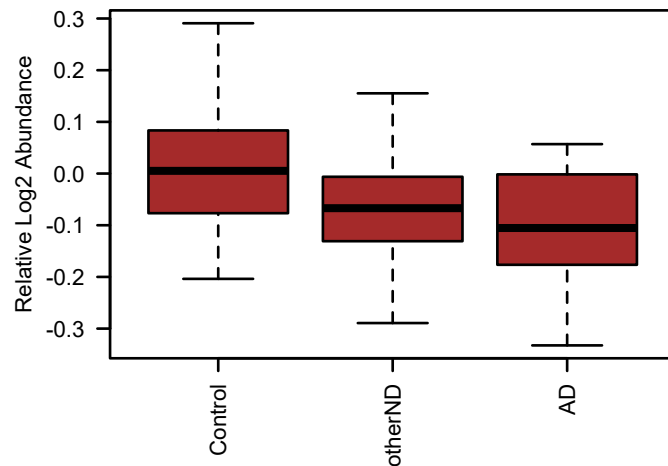

**bicor=-0.19, p=0.078**  
**cor=-0.22, p=0.044**

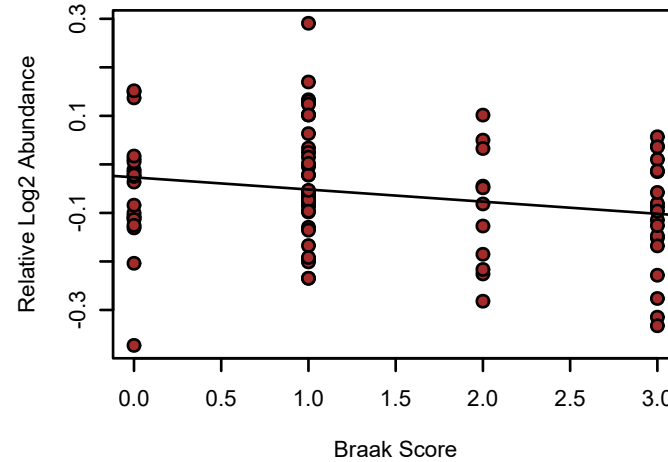

**bicor=-0.15, p=0.14**  
**cor=-0.16, p=0.11**

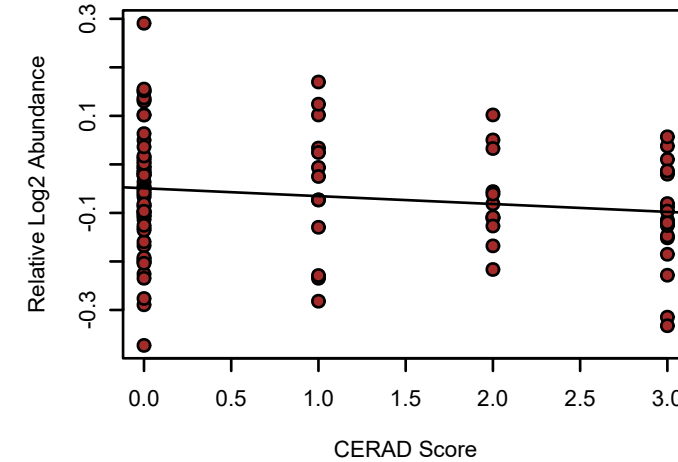

**XRCC6 UPenn Mixed PRM**  
M4 yellow MEGA module member  
K-W ANOVA p: 0.0019

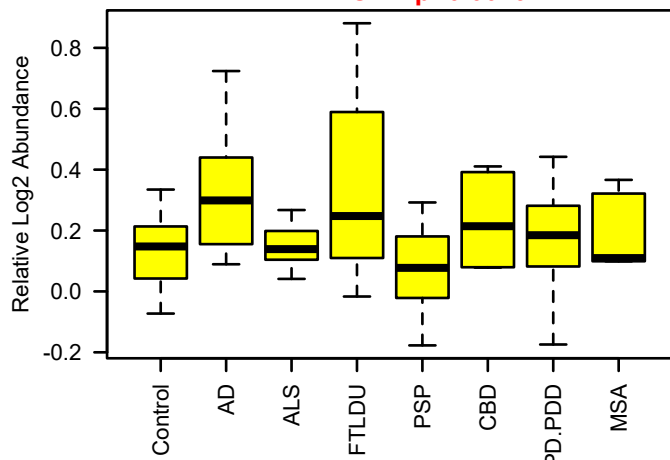

**XRCC6 UPenn Mixed PRM**  
K-W ANOVA p: 0.004

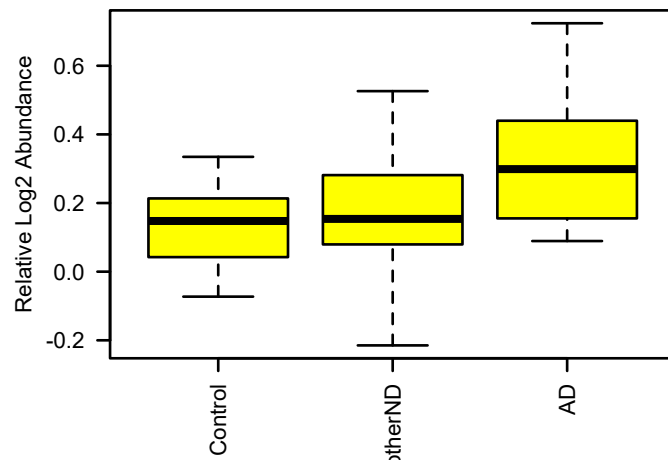

**bicor=0.32, p=0.0028**  
**cor=0.31, p=0.0041**

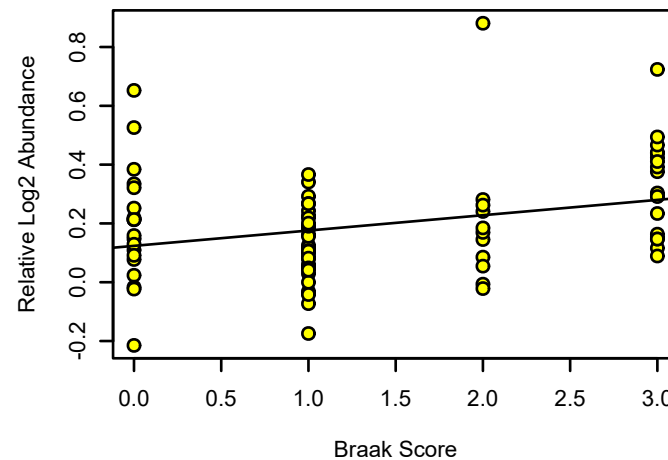

**bicor=0.25, p=0.011**  
**cor=0.24, p=0.016**

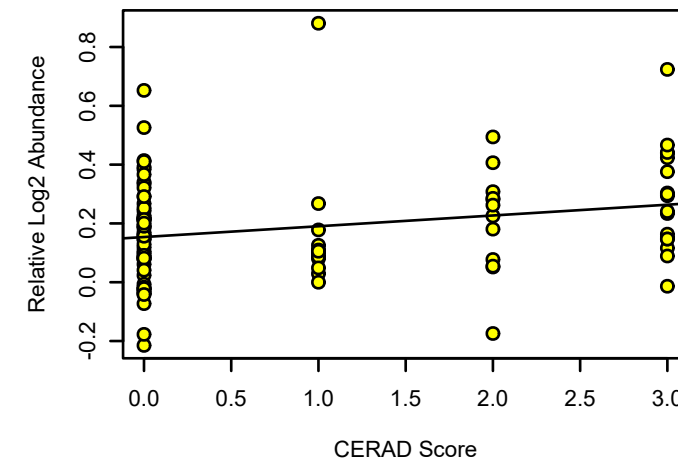

**XRCC5 UPenn Mixed PRM**  
M10 purple MEGA module member  
K-W ANOVA p: 2.9e-05

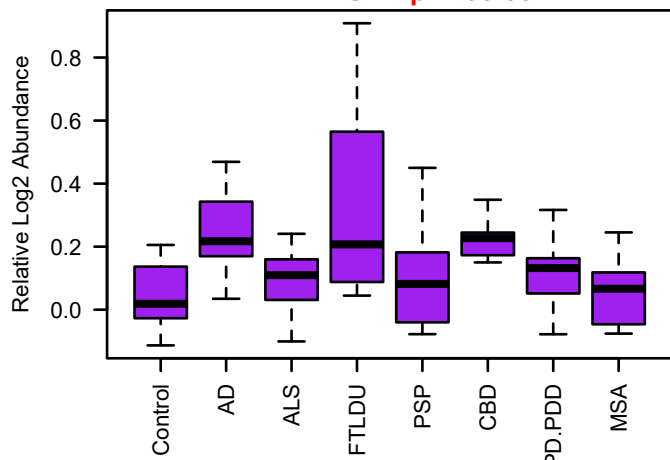

**XRCC5 UPenn Mixed PRM**  
K-W ANOVA p: 0.00083

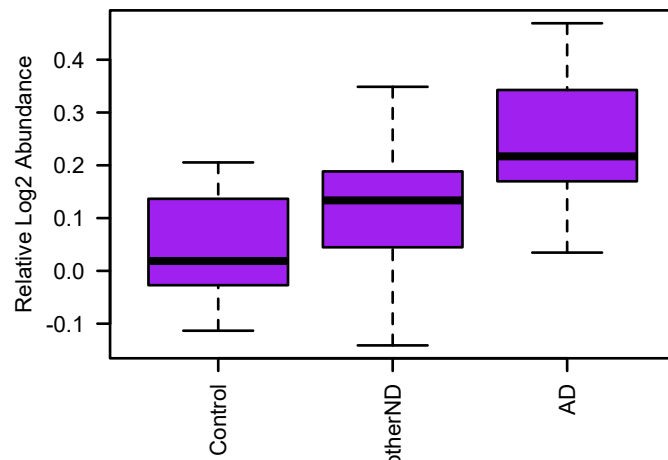

**bicor=0.37, p=0.00052**  
**cor=0.33, p=0.0022**

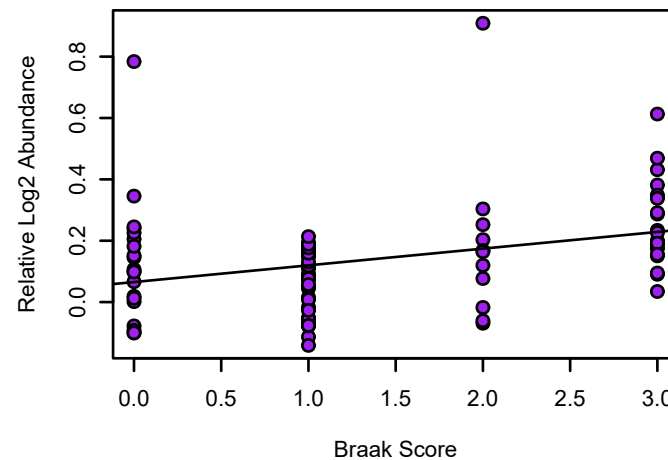

**bicor=0.27, p=0.0058**  
**cor=0.22, p=0.028**

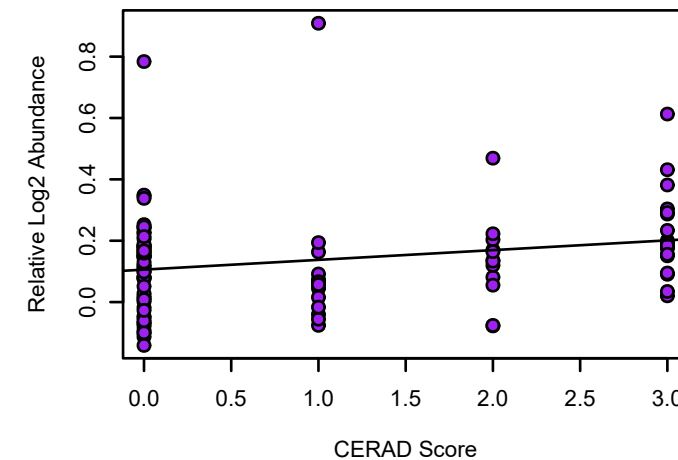

**COX41 UPenn Mixed PRM**  
M3 brown MEGA module member  
K-W ANOVA p: 0.31

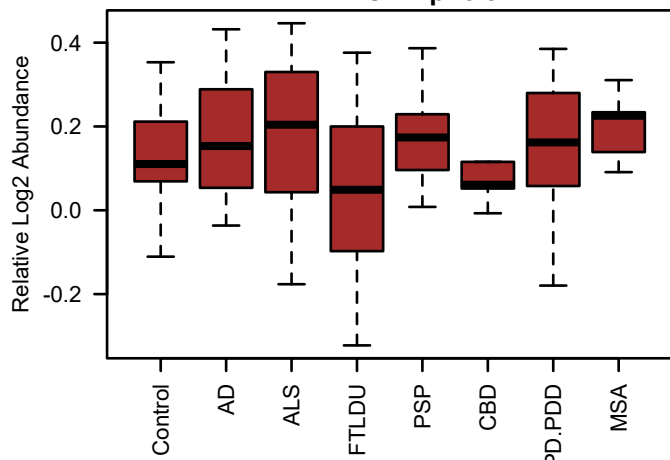

**COX41 UPenn Mixed PRM**  
K-W ANOVA p: 0.76

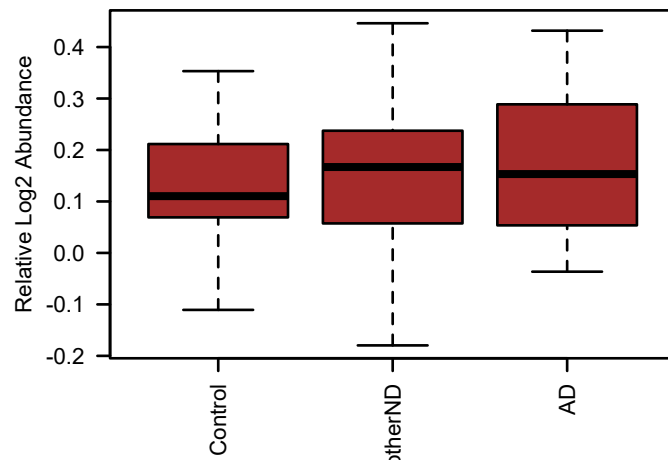

**bicor=-0.051, p=0.65**  
**cor=-0.081, p=0.46**

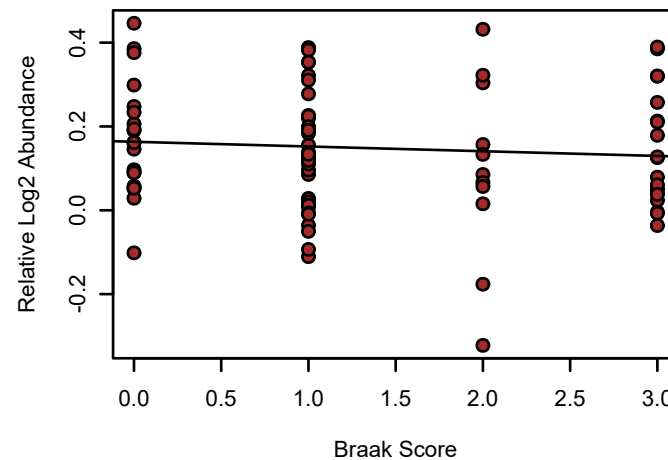

**bicor=0.037, p=0.71**  
**cor=0.041, p=0.69**

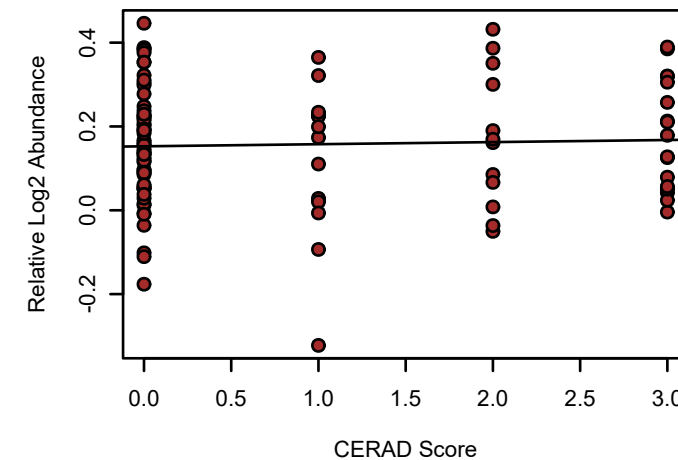

**ATP1A3 UPenn Mixed PRM**  
M3 brown MEGA module member  
K-W ANOVA p: 0.24

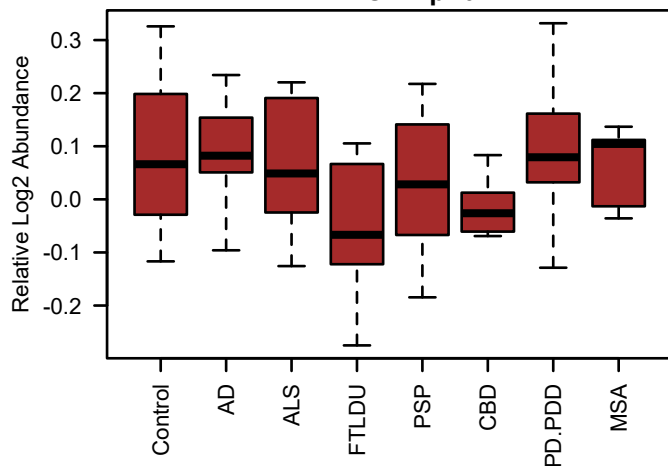

**ATP1A3 UPenn Mixed PRM**  
K-W ANOVA p: 0.54

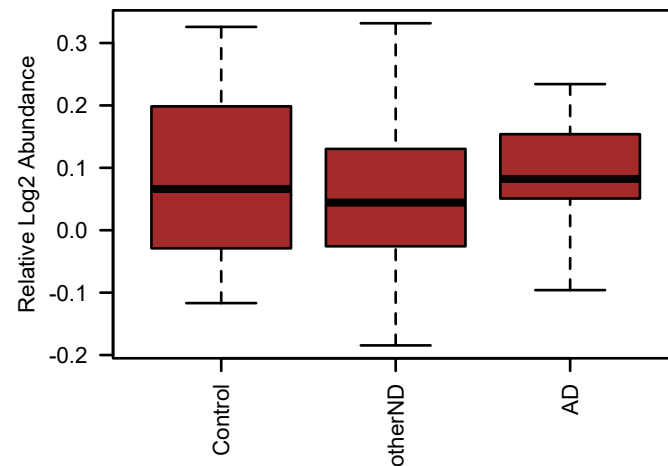

**bicor=0.037, p=0.74**  
**cor=-0.017, p=0.88**

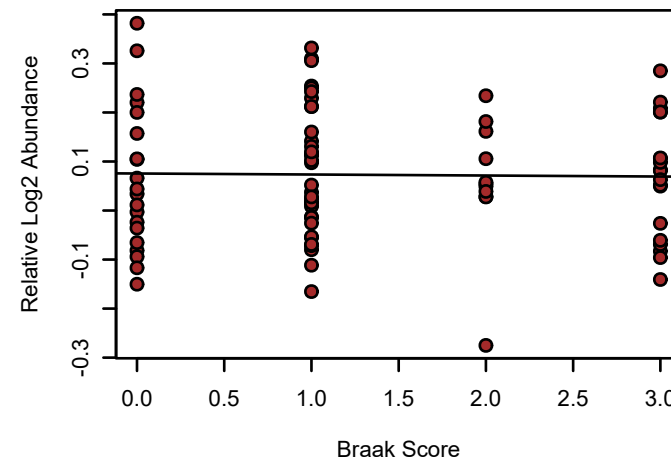

**bicor=-0.017, p=0.87**  
**cor=-0.032, p=0.75**

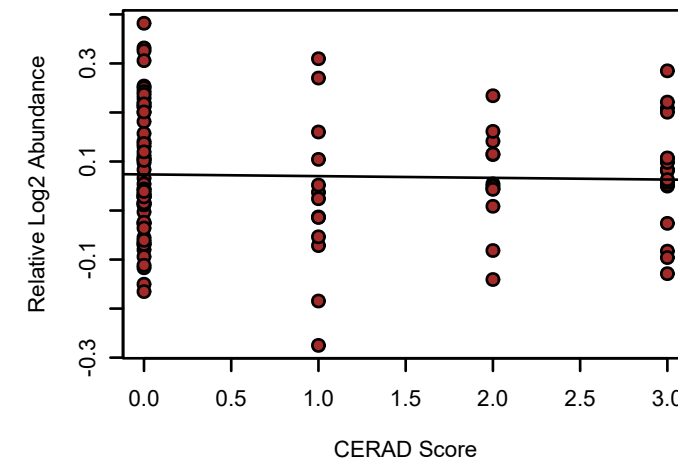

**GFAP UPenn Mixed PRM**  
M4 yellow MEGA module member  
K-W ANOVA p: 2.7e-07

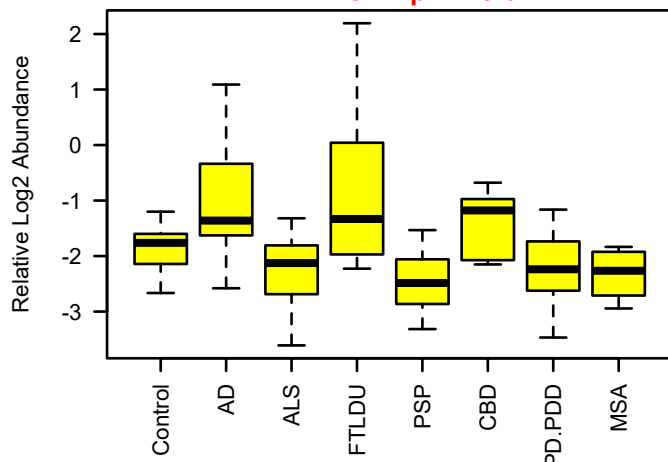

**GFAP UPenn Mixed PRM**  
K-W ANOVA p: 0.00011

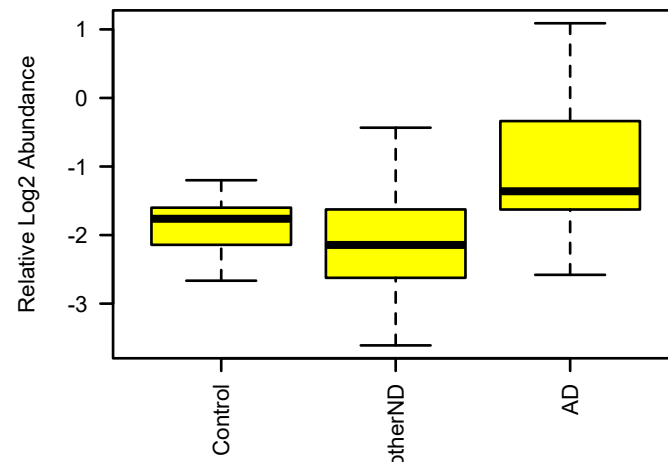

**bicor=0.33, p=0.0019**  
**cor=0.37, p=0.00053**

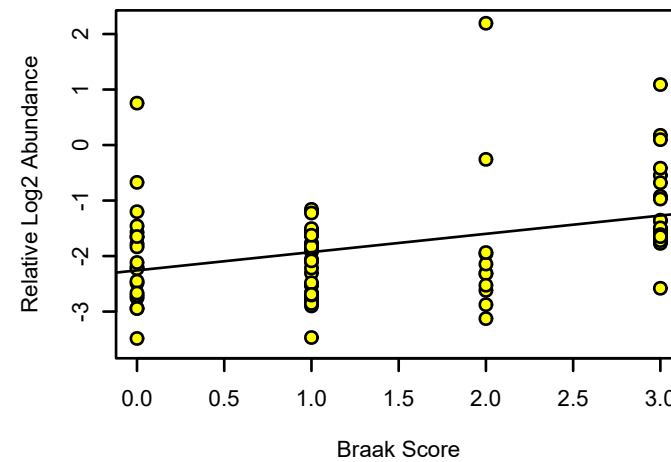

**bicor=0.34, p=0.00049**  
**cor=0.32, p=0.0012**

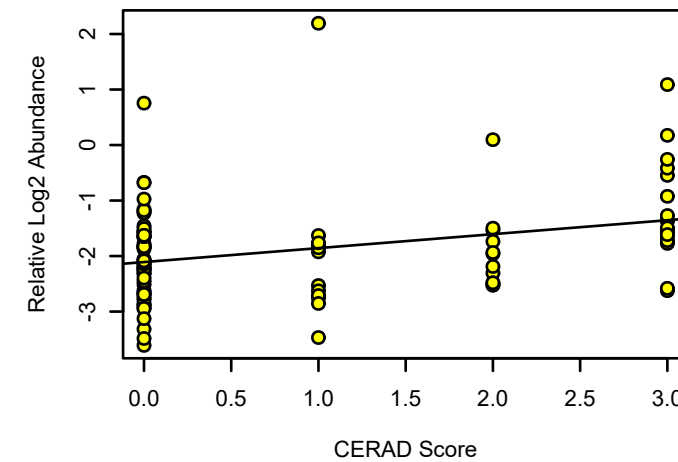

**PKM UPenn Mixed PRM**  
M4 yellow MEGA module member  
K-W ANOVA p: 3.1e-06

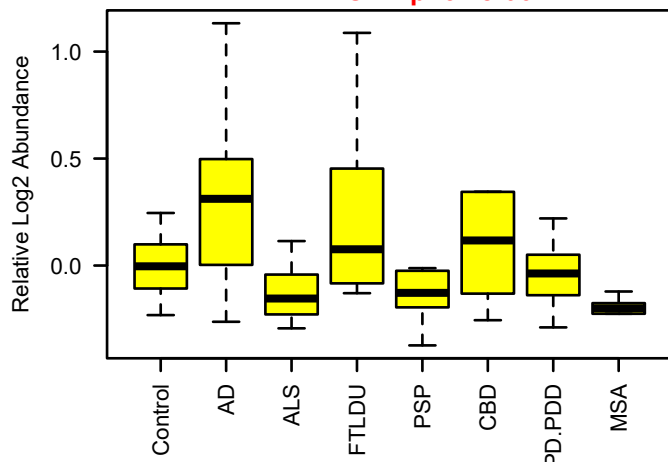

**PKM UPenn Mixed PRM**  
K-W ANOVA p: 1.7e-05

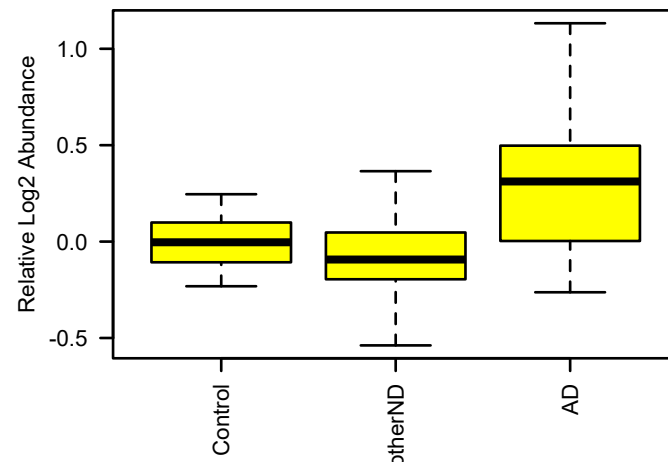

**bicor=0.36, p=0.00082**  
**cor=0.4, p=0.00016**

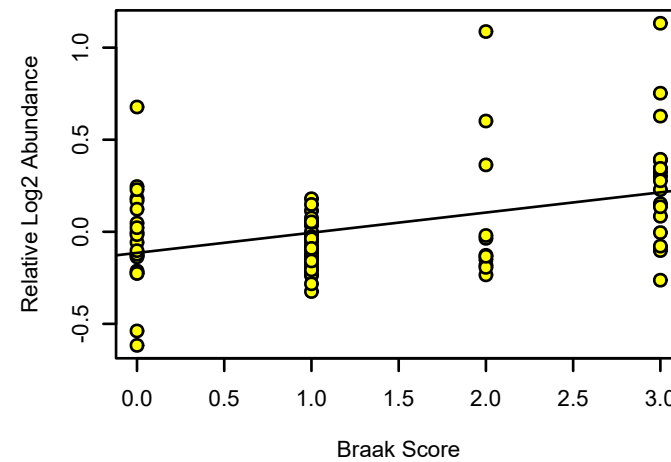

**bicor=0.21, p=0.035**  
**cor=0.26, p=0.009**

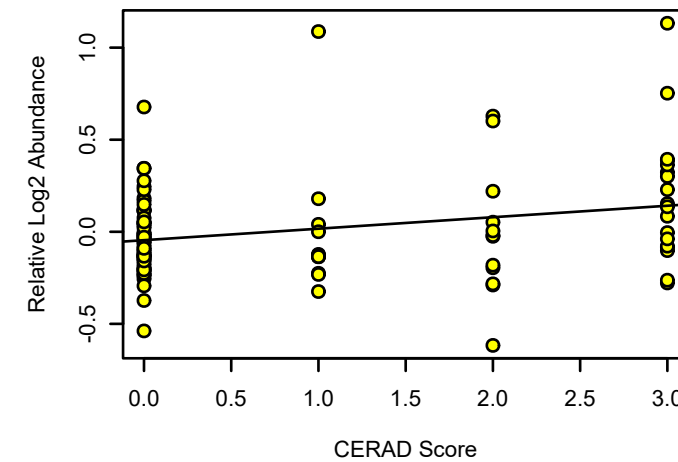

**UQCRB UPenn Mixed PRM**  
M3 brown MEGA module member  
K-W ANOVA p: 0.0053

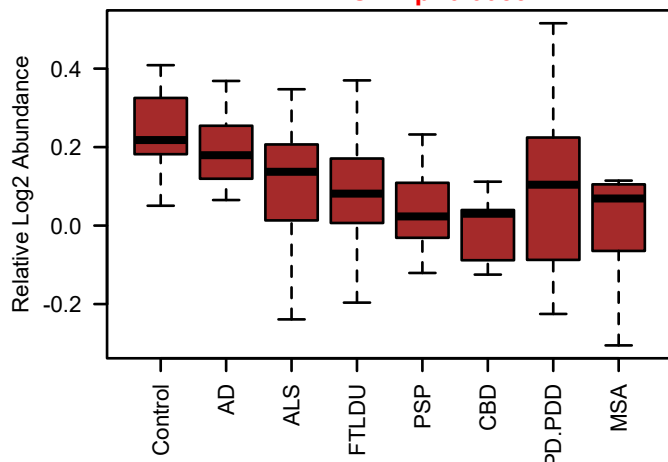

**UQCRB UPenn Mixed PRM**  
K-W ANOVA p: 0.00054

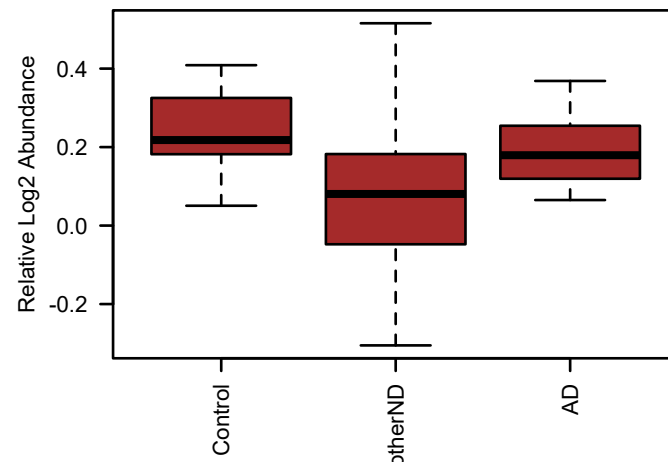

**bicor=-0.013, p=0.91**  
**cor=0.019, p=0.86**

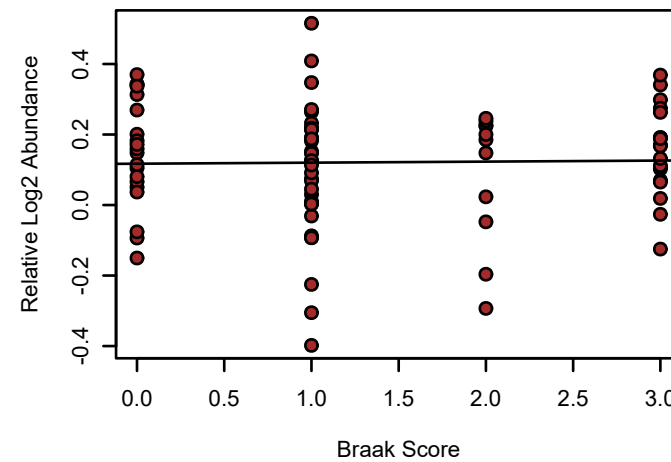

**bicor=0.088, p=0.39**  
**cor=0.062, p=0.54**

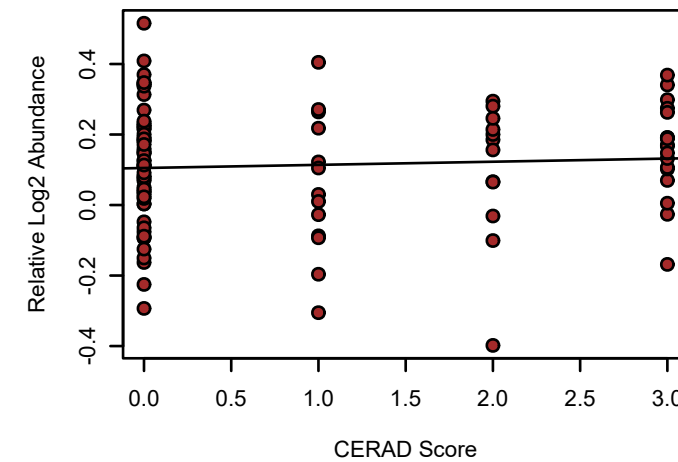

**AKR1B1 UPenn Mixed PRM**  
M4 yellow MEGA module member  
K-W ANOVA p: 5.5e-06

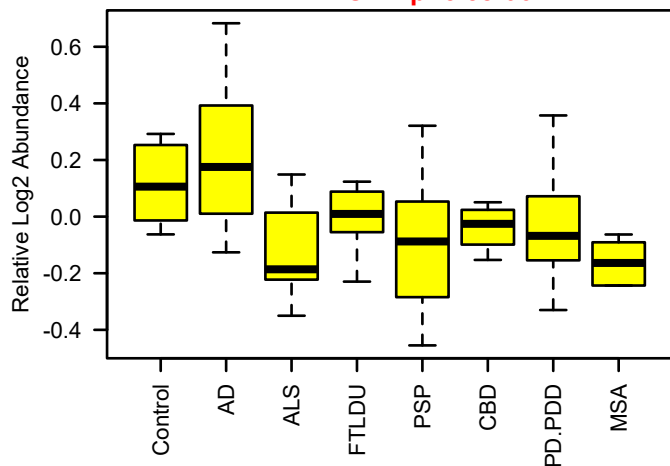

**AKR1B1 UPenn Mixed PRM**  
K-W ANOVA p: 2.6e-07

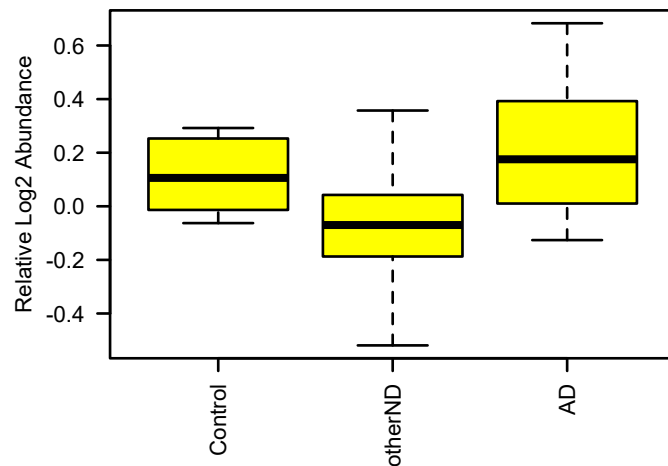

**bicor=0.24, p=0.031**  
**cor=0.27, p=0.013**

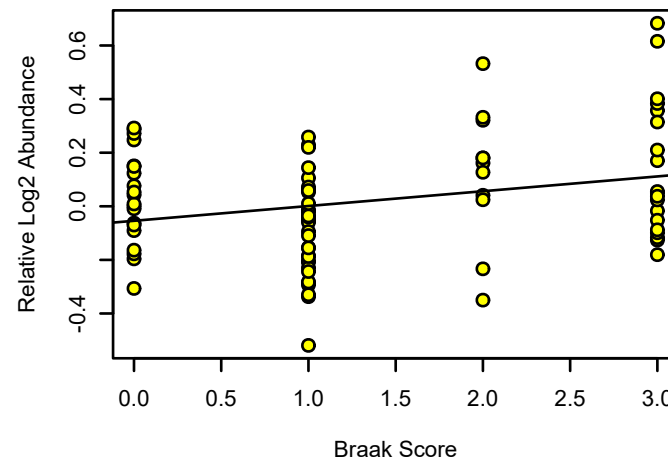

**bicor=0.29, p=0.003**  
**cor=0.33, p=8e-04**

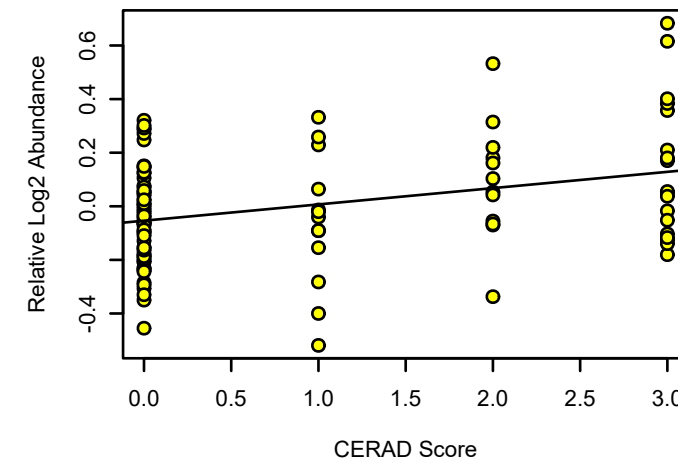

**PGAM2 UPenn Mixed PRM**  
M4 yellow MEGA module member  
K-W ANOVA p: 1.2e-06

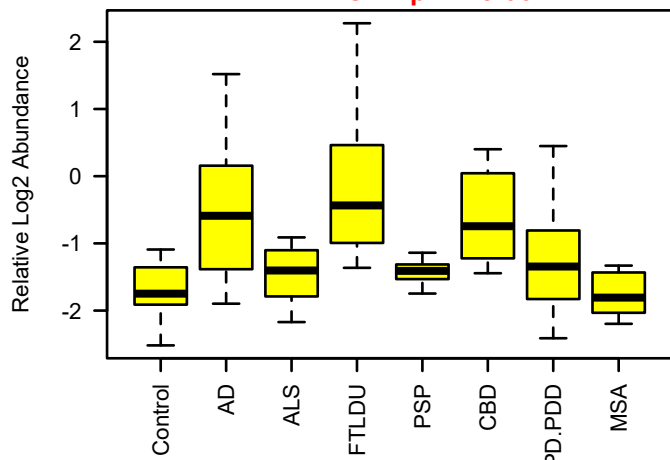

**PGAM2 UPenn Mixed PRM**  
K-W ANOVA p: 0.00018

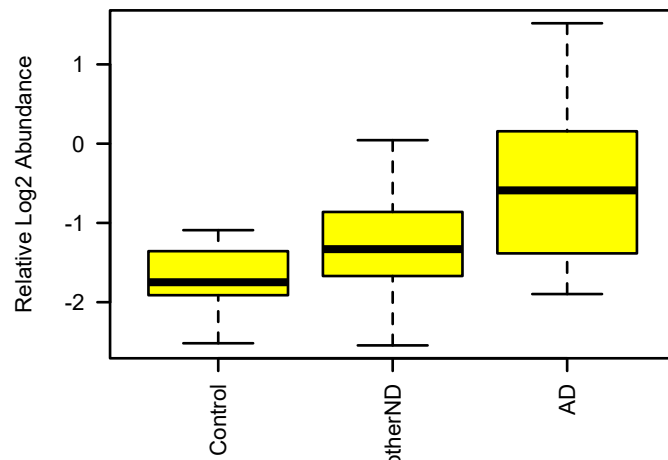

**bicor=0.43, p=3.9e-05**  
**cor=0.41, p=0.00011**

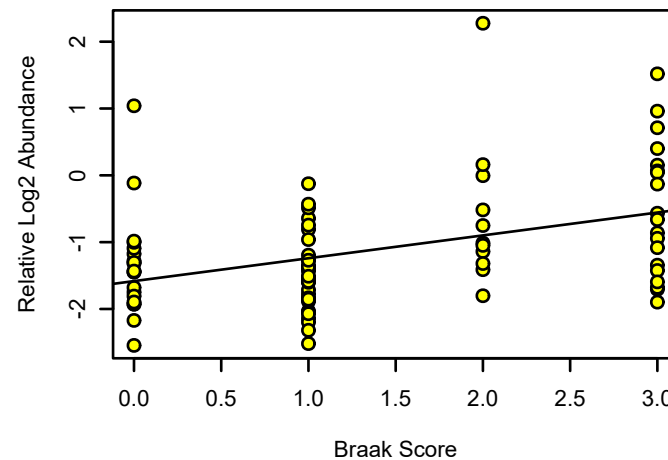

**bicor=0.23, p=0.02**  
**cor=0.25, p=0.012**

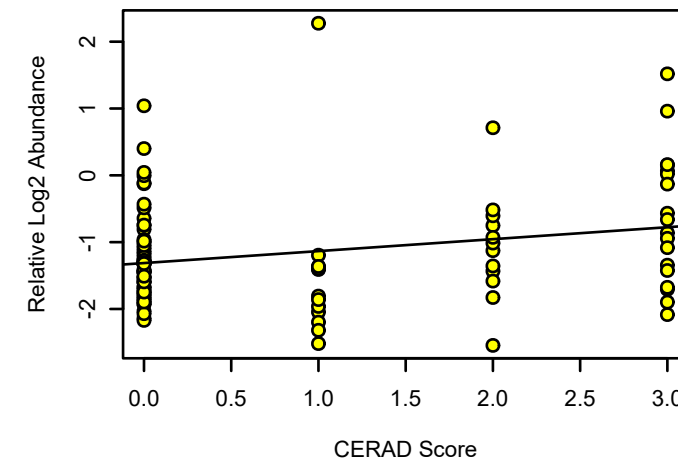

**ATP2A2 UPenn Mixed PRM**  
M1 turquoise MEGA module member  
K-W ANOVA p: 0.01

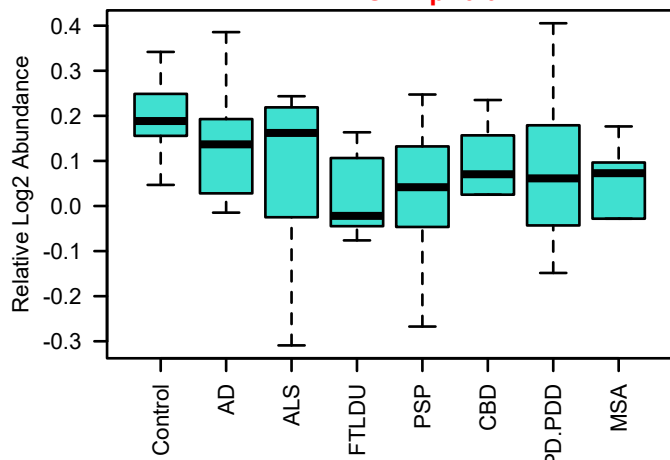

**ATP2A2 UPenn Mixed PRM**  
K-W ANOVA p: 0.00043

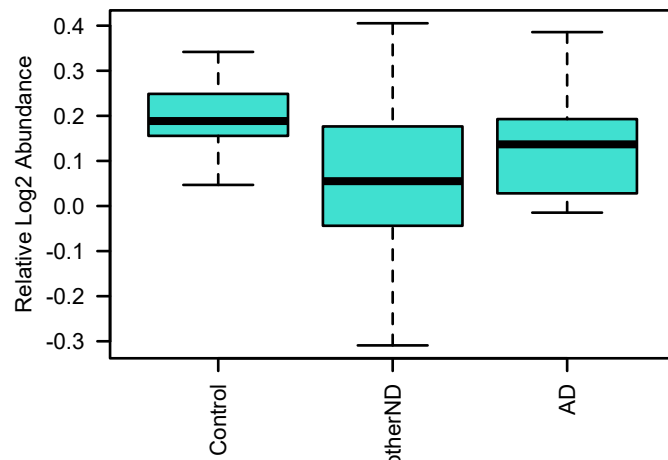

**bicor=-0.13, p=0.26**  
**cor=-0.085, p=0.44**

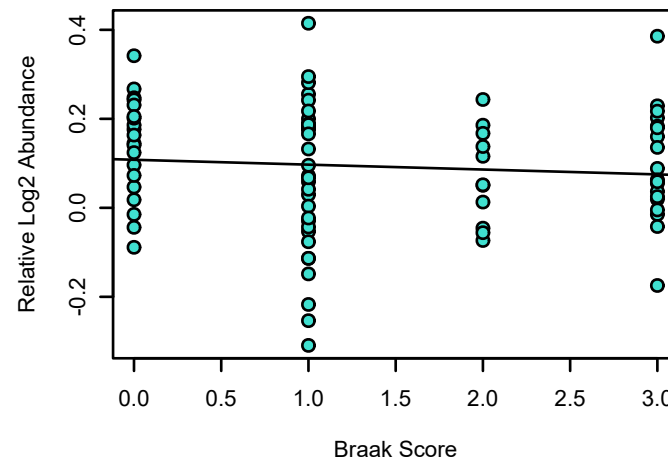

**bicor=0.082, p=0.42**  
**cor=0.093, p=0.36**

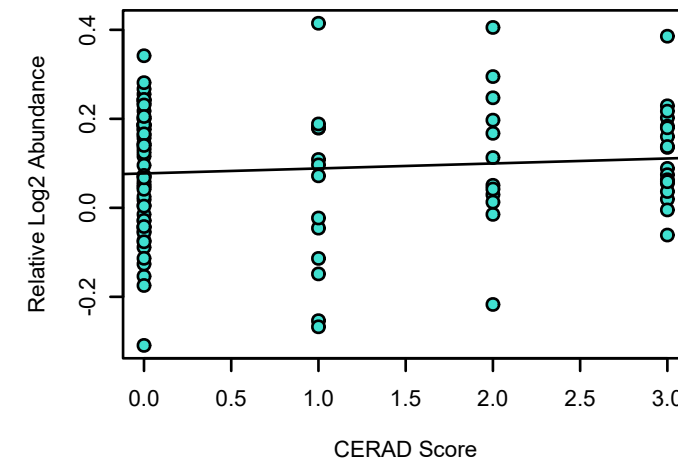

**CPE UPenn Mixed PRM**  
NA grey MEGA module member  
K-W ANOVA p: 0.01

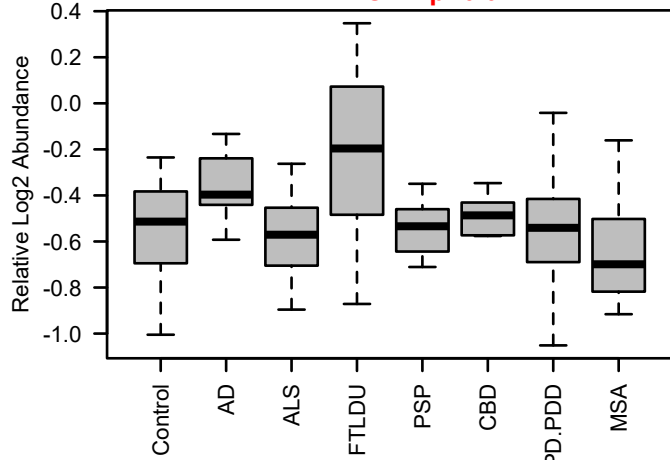

**CPE UPenn Mixed PRM**  
K-W ANOVA p: 0.15

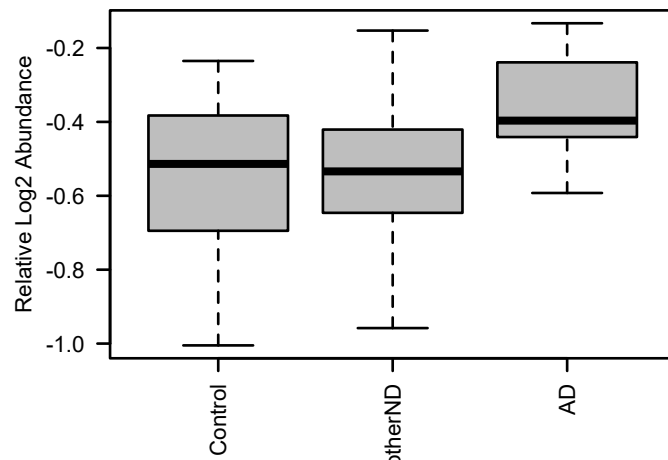

**bicor=0.13, p=0.25**  
**cor=0.16, p=0.15**

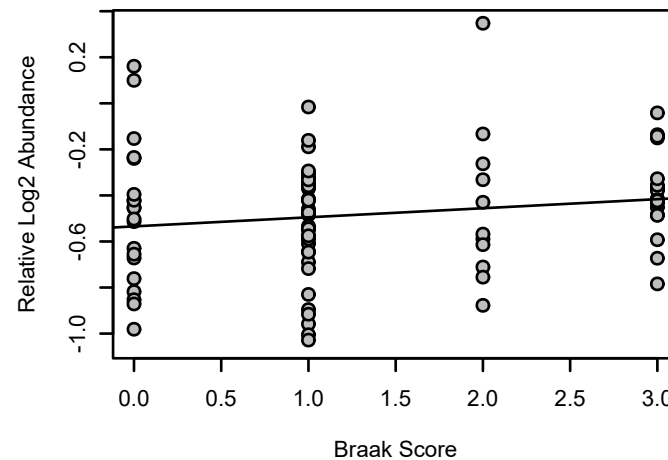

**bicor=0.26, p=0.0097**  
**cor=0.24, p=0.016**

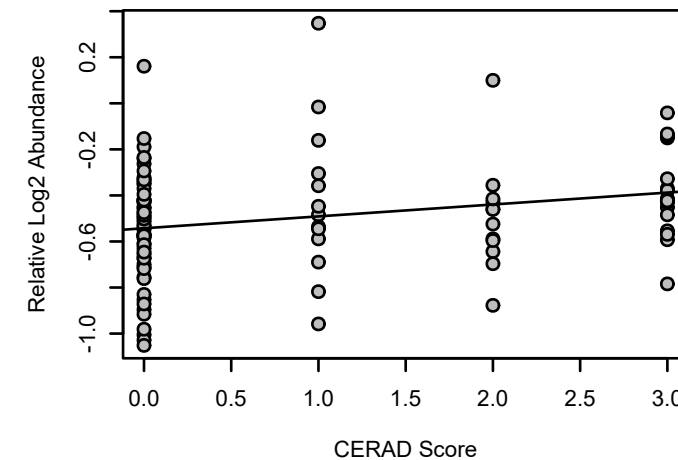



**GOT1 UPenn Mixed PRM**  
NA grey MEGA module member  
K-W ANOVA p: 2e-04

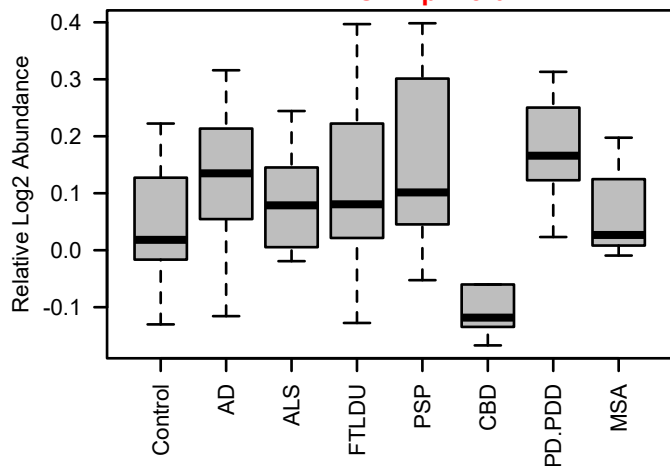

**GOT1 UPenn Mixed PRM**  
K-W ANOVA p: 0.06

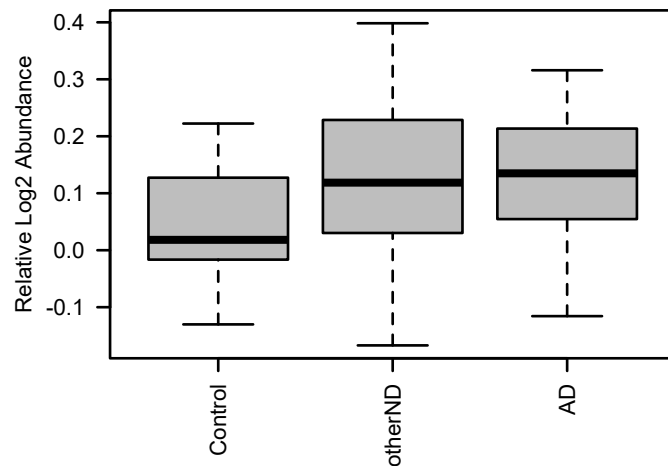

**bicor=0.088, p=0.43**  
**cor=0.081, p=0.46**

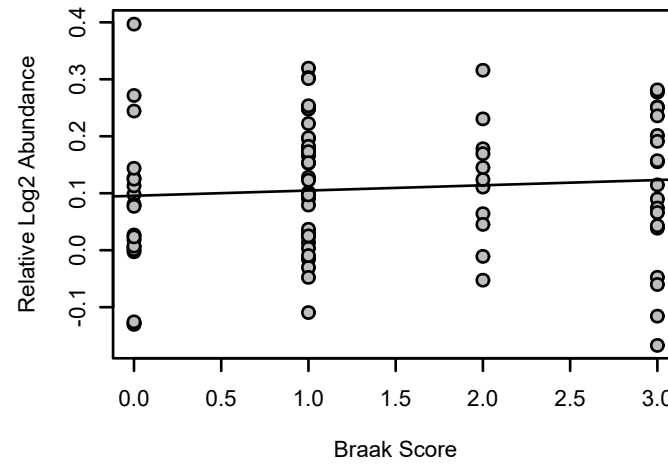

**bicor=0.21, p=0.037**  
**cor=0.2, p=0.046**

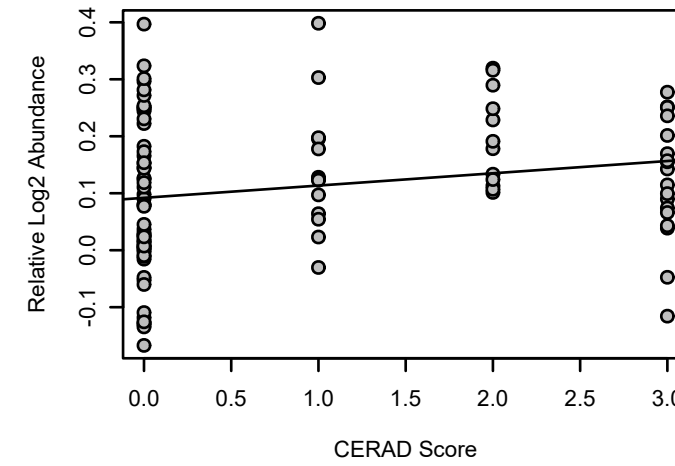

**SYN1 UPenn Mixed PRM**  
M1 turquoise MEGA module member  
K-W ANOVA p: 0.91

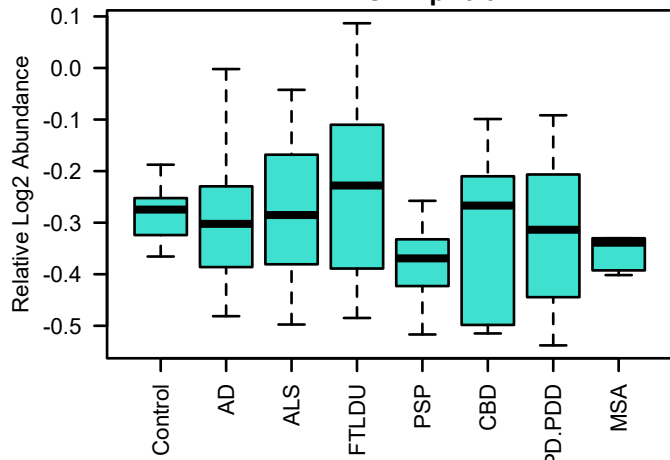

**SYN1 UPenn Mixed PRM**  
K-W ANOVA p: 0.81

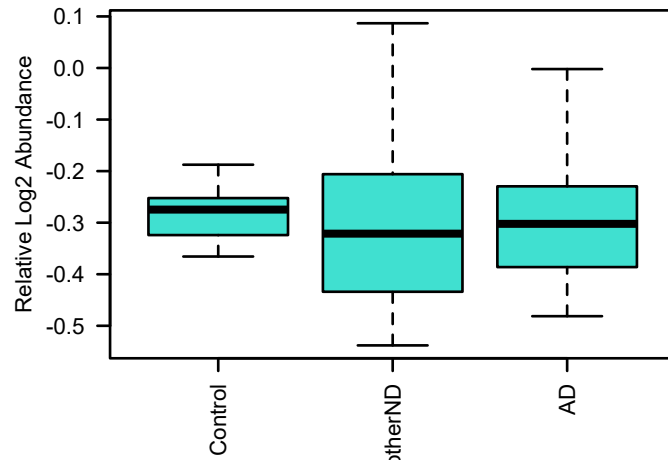

**bicor=-0.019, p=0.87**  
**cor=-0.0043, p=0.97**

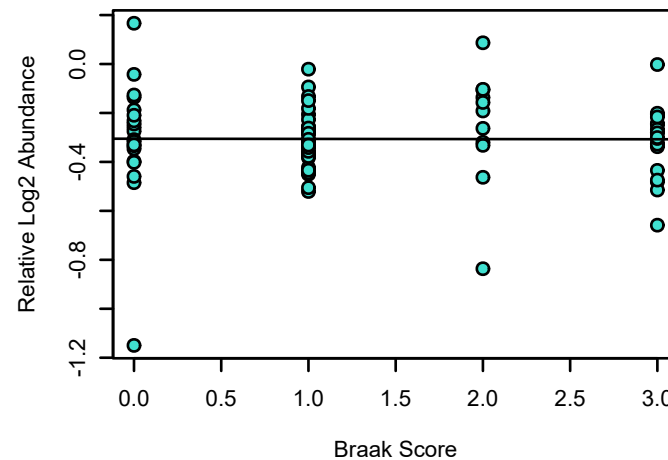

**bicor=0.099, p=0.33**  
**cor=0.099, p=0.33**

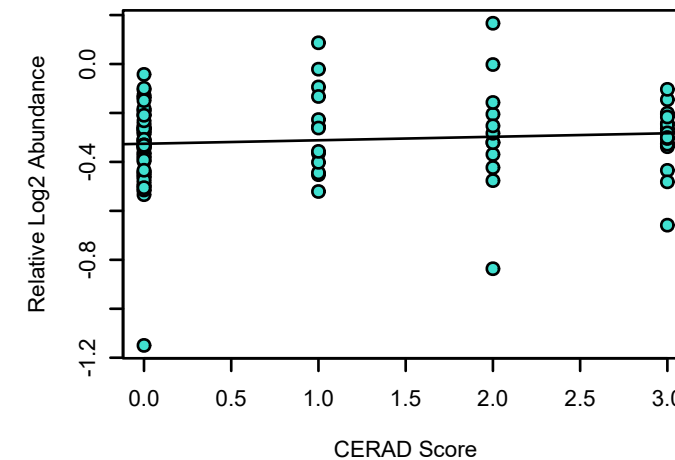

**CAPN2 UPenn Mixed PRM**  
M4 yellow MEGA module member  
K-W ANOVA p: 1.5e-08

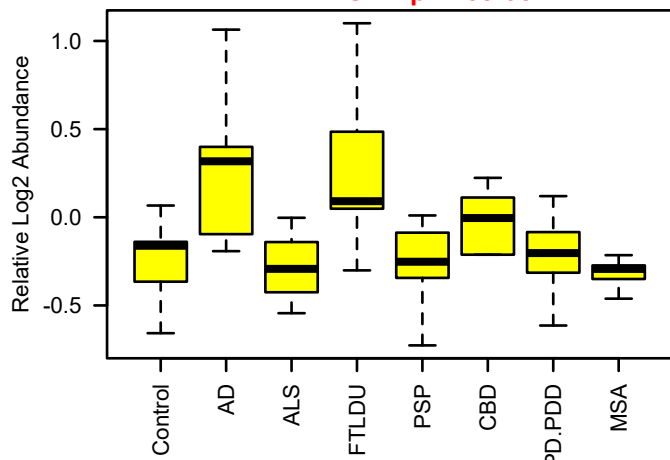

**CAPN2 UPenn Mixed PRM**  
K-W ANOVA p: 9.1e-07

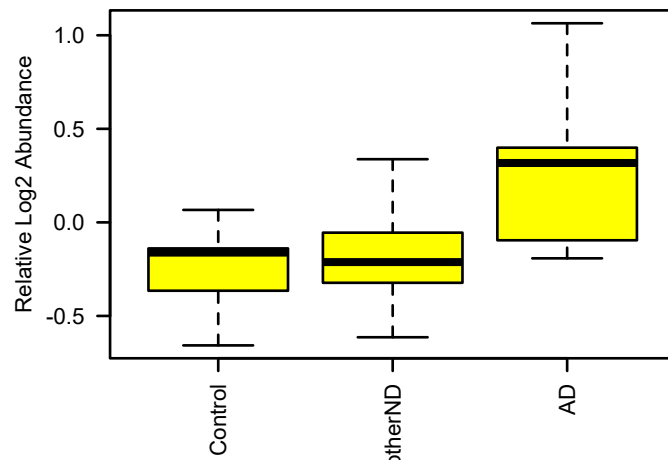

**bicor=0.49, p=2.9e-06**  
**cor=0.46, p=1.1e-05**

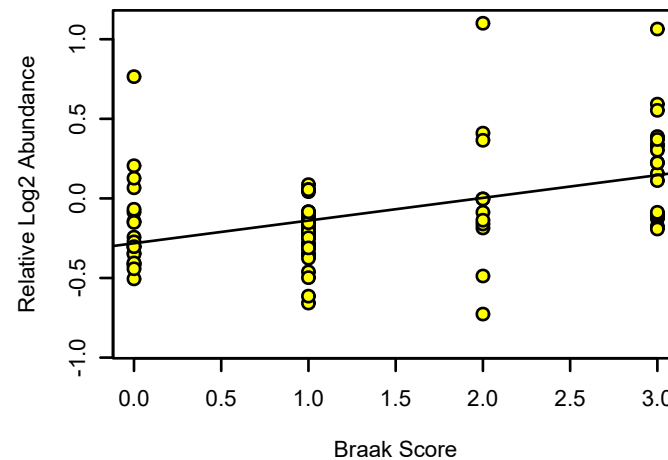

**bicor=0.39, p=7.6e-05**  
**cor=0.39, p=6e-05**

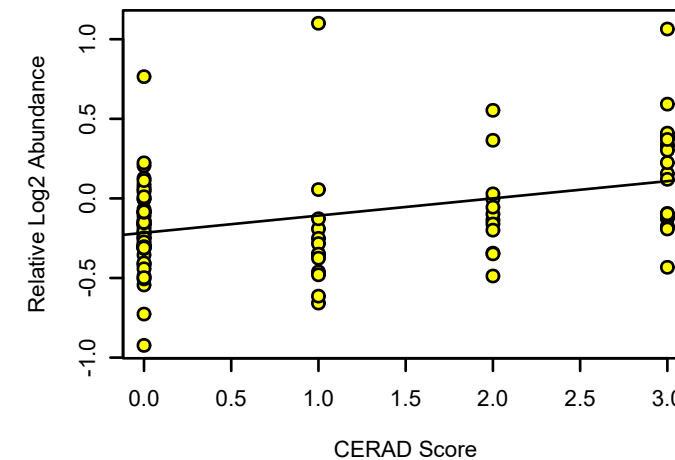

**GAP43 UPenn Mixed PRM**  
M6 red MEGA module member  
K-W ANOVA p: 0.23

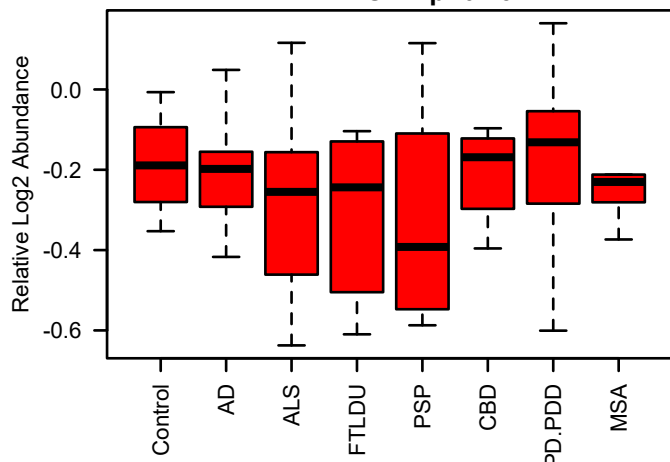

**GAP43 UPenn Mixed PRM**  
K-W ANOVA p: 0.77

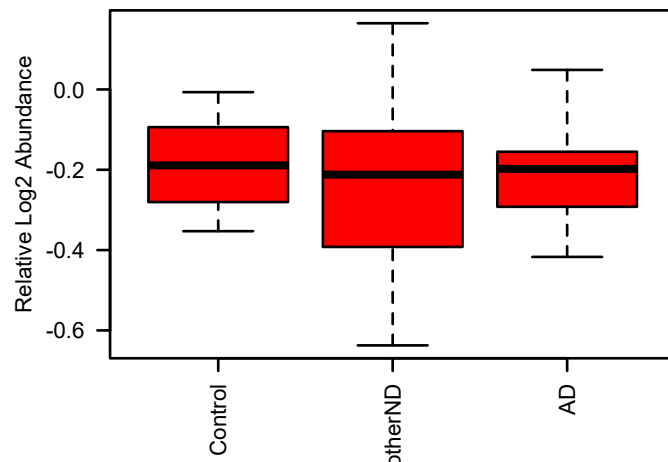

**bicor=-0.093, p=0.4**  
**cor=-0.0021, p=0.98**

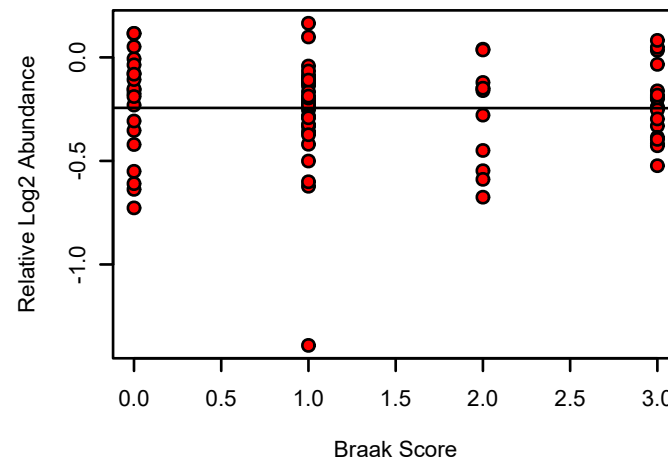

**bicor=0.15, p=0.15**  
**cor=0.086, p=0.39**

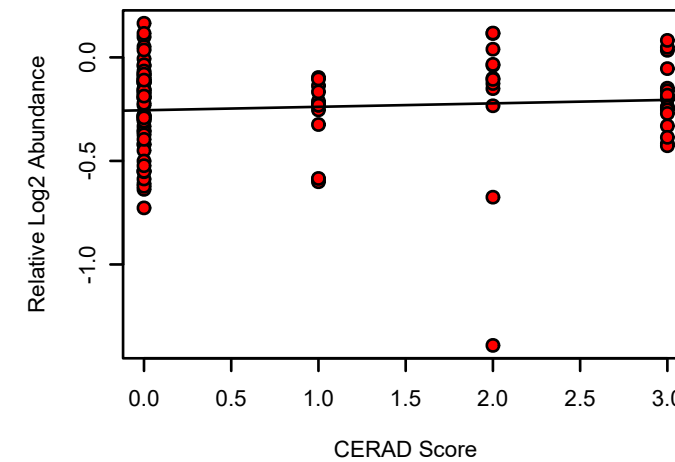

**TCP1 UPenn Mixed PRM**  
**M11 greenyellow MEGA module member**  
**K-W ANOVA p: 0.00071**

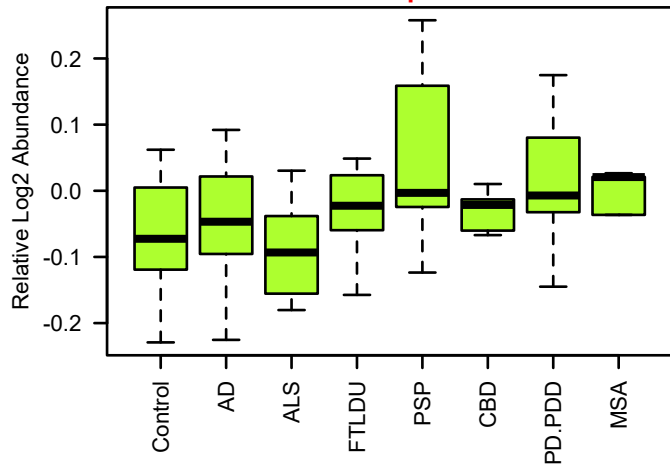

**TCP1 UPenn Mixed PRM**  
**K-W ANOVA p: 0.047**

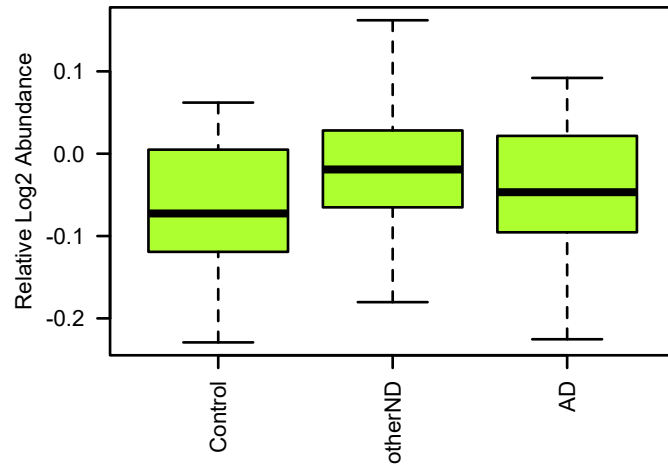

**bicor=0.1, p=0.36**  
**cor=0.077, p=0.49**

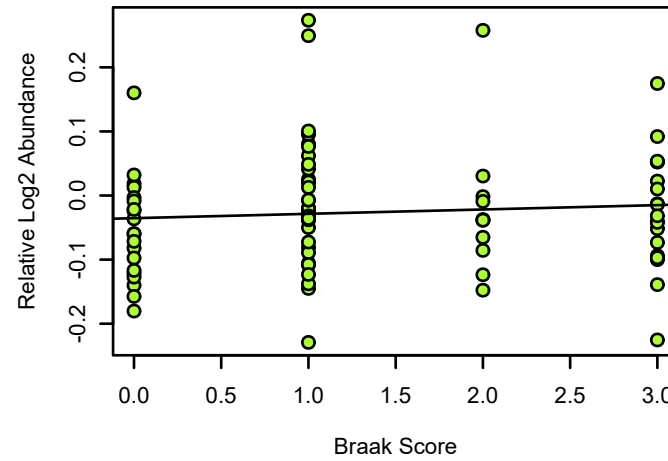

**bicor=0.11, p=0.3**  
**cor=0.066, p=0.51**

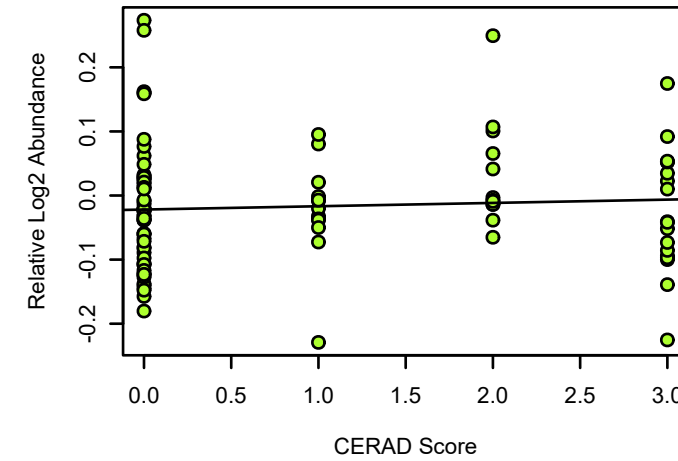

**NCL UPenn Mixed PRM**  
**M10 purple MEGA module member**  
**K-W ANOVA p: 1.8e-05**

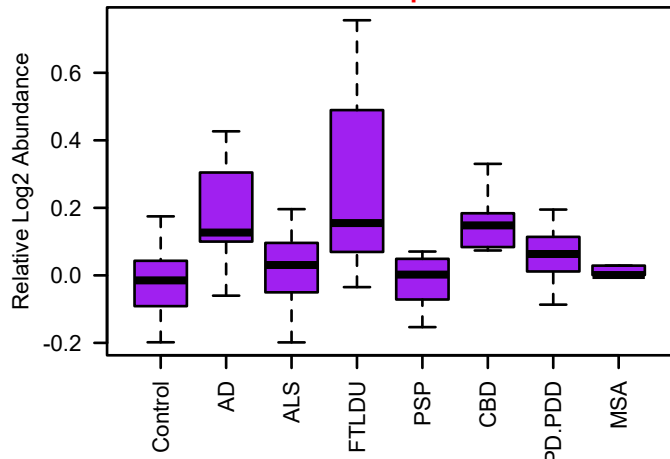

**NCL UPenn Mixed PRM**  
**K-W ANOVA p: 0.00087**

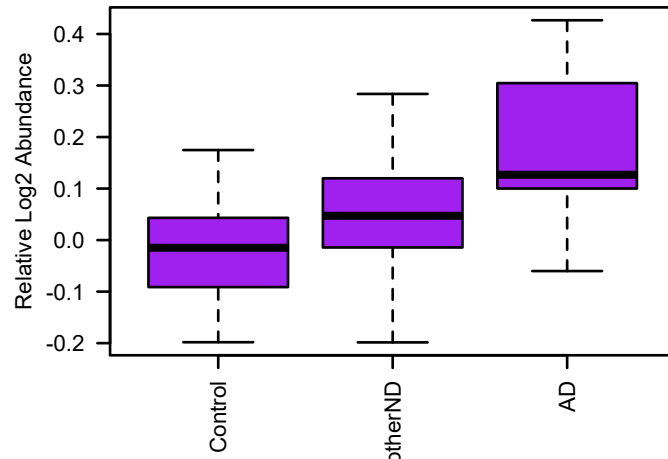

**bicor=0.4, p=0.00015**  
**cor=0.35, p=0.0011**

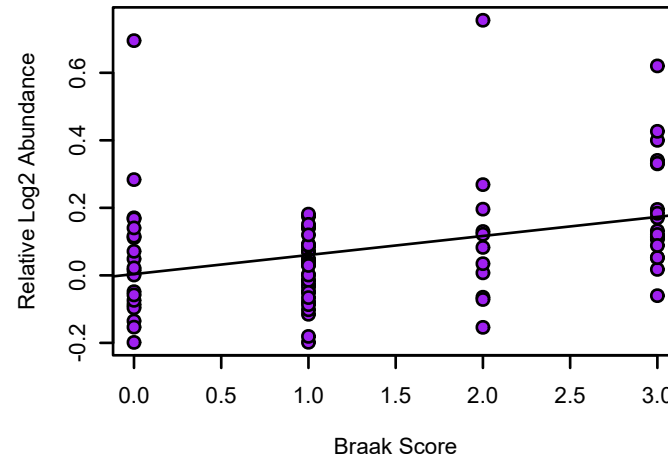

**bicor=0.22, p=0.027**  
**cor=0.2, p=0.046**

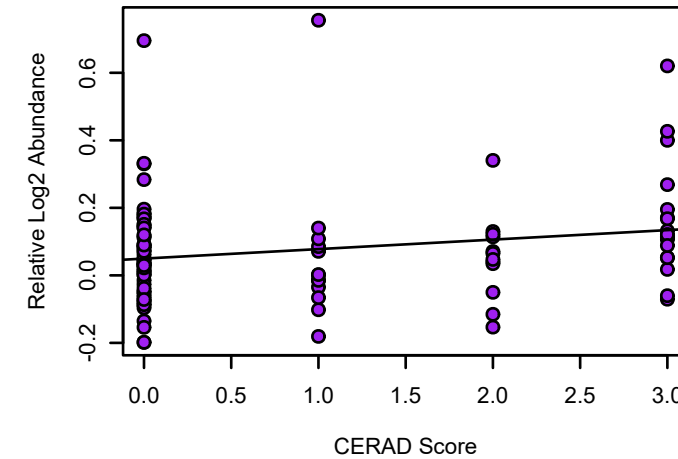

**NDUFV2 UPenn Mixed PRM**  
**M3 brown MEGA module member**  
**K-W ANOVA p: 7.8e-05**

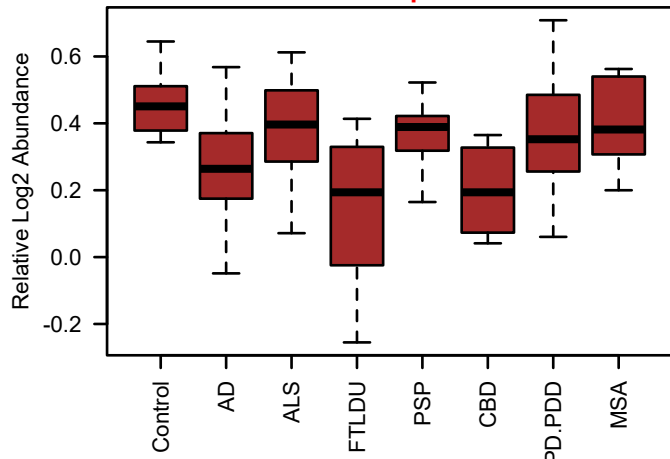

**NDUFV2 UPenn Mixed PRM**  
**K-W ANOVA p: 0.0025**

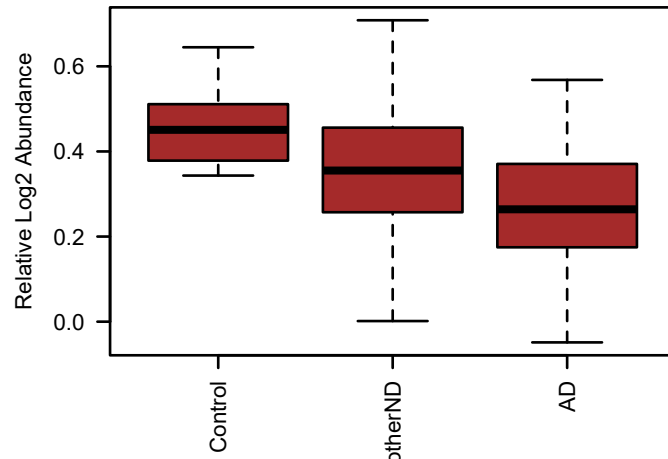

**bicor=-0.31, p=0.0036**  
**cor=-0.29, p=0.0075**

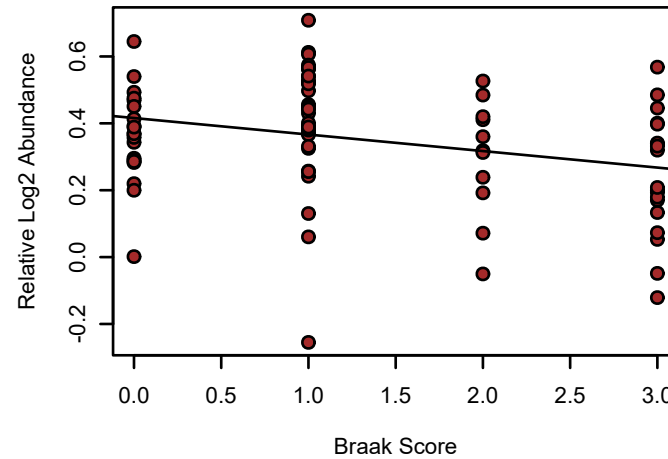

**bicor=-0.23, p=0.02**  
**cor=-0.22, p=0.028**

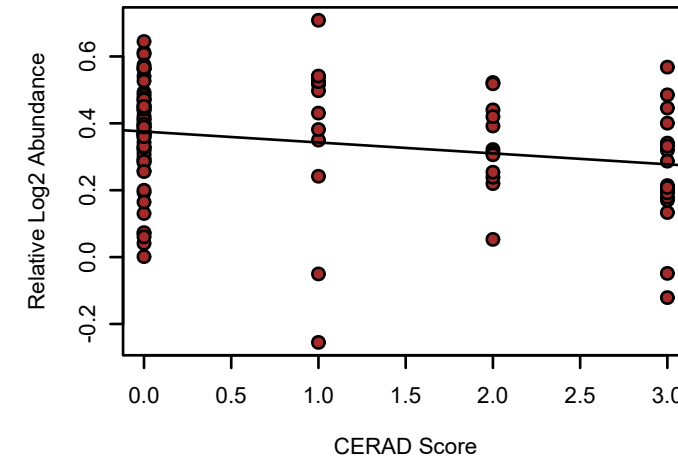

**ATP2B1 UPenn Mixed PRM**  
**M1 turquoise MEGA module member**  
**K-W ANOVA p: 0.0075**

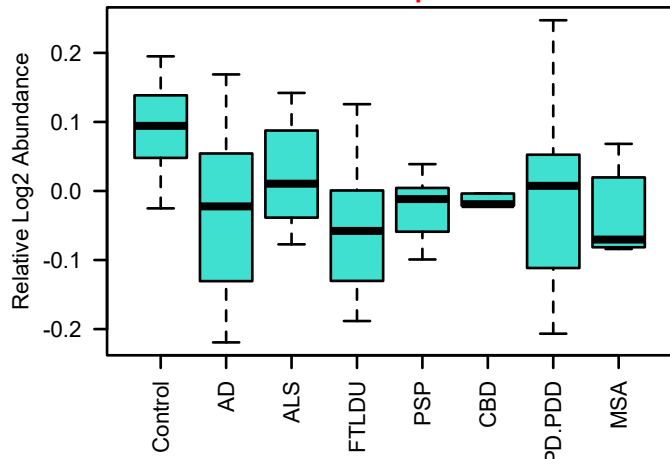

**ATP2B1 UPenn Mixed PRM**  
**K-W ANOVA p: 0.00066**

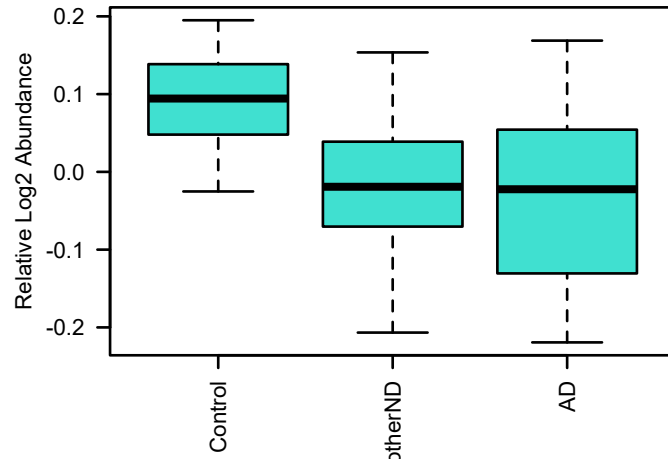

**bicor=-0.21, p=0.051**  
**cor=-0.22, p=0.044**

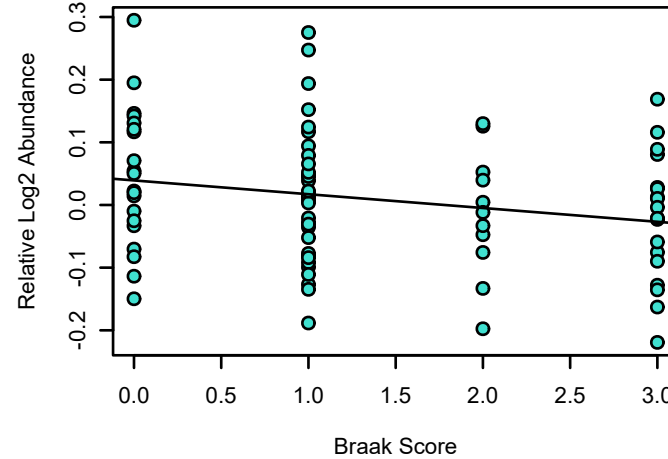

**bicor=-0.21, p=0.038**  
**cor=-0.22, p=0.028**

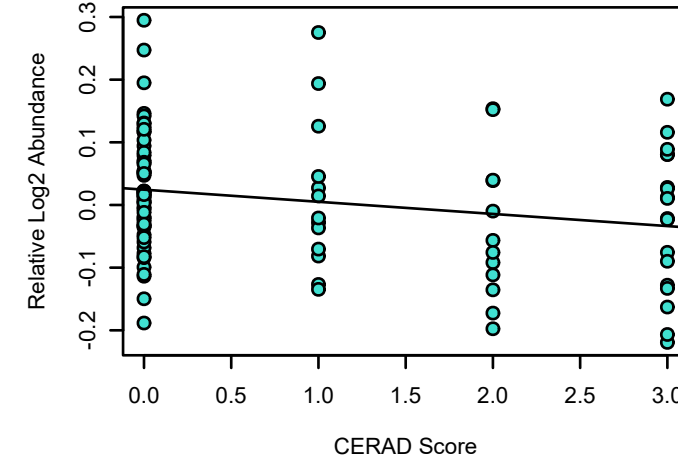

**RAB3A UPenn Mixed PRM**  
M1 turquoise MEGA module member  
K-W ANOVA p: 7.5e-05

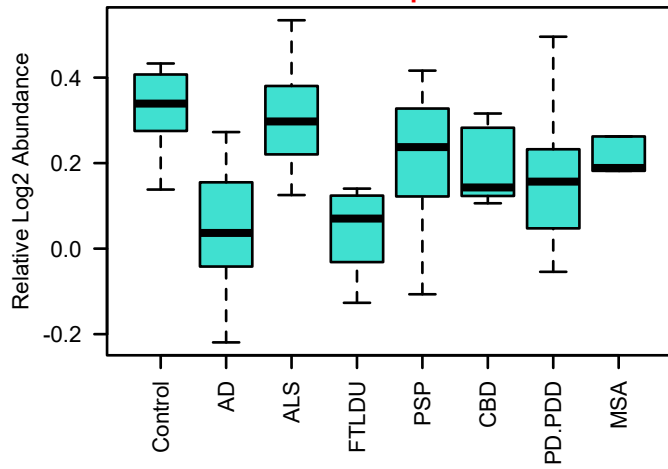

**RAB3A UPenn Mixed PRM**  
K-W ANOVA p: 4.4e-05

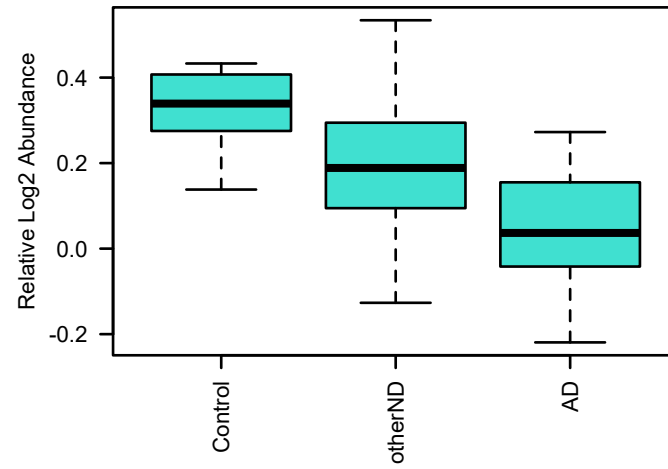

**bicor=-0.3, p=0.0049**  
**cor=-0.31, p=0.0041**

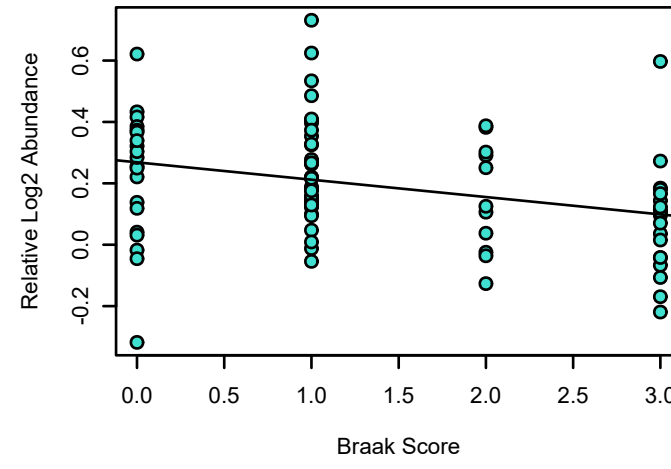

**bicor=-0.29, p=0.0033**  
**cor=-0.26, p=0.009**

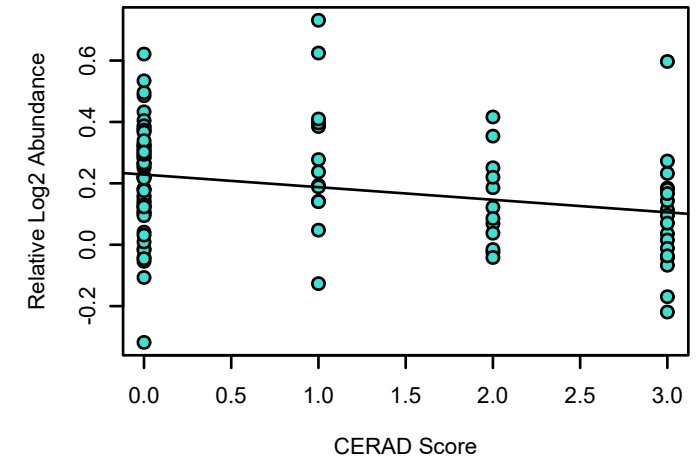

**MAG UPenn Mixed PRM**  
M2 blue MEGA module member  
K-W ANOVA p: 0.0067

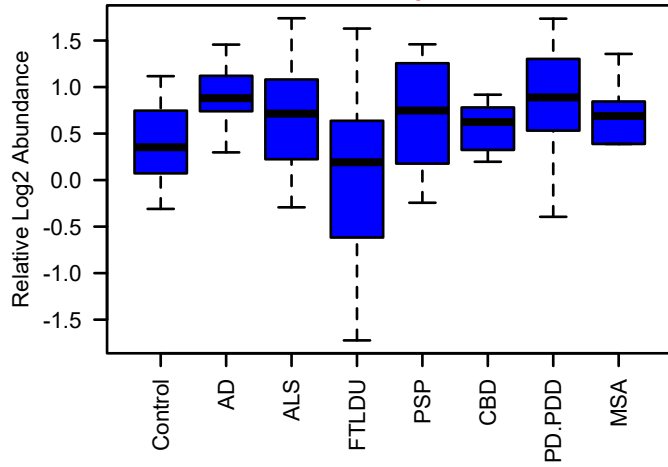

**MAG UPenn Mixed PRM**  
K-W ANOVA p: 0.042

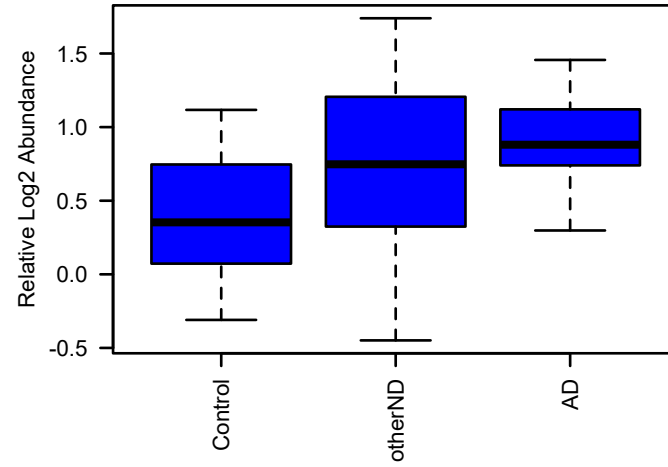

**bicor=0.21, p=0.05**  
**cor=0.23, p=0.035**

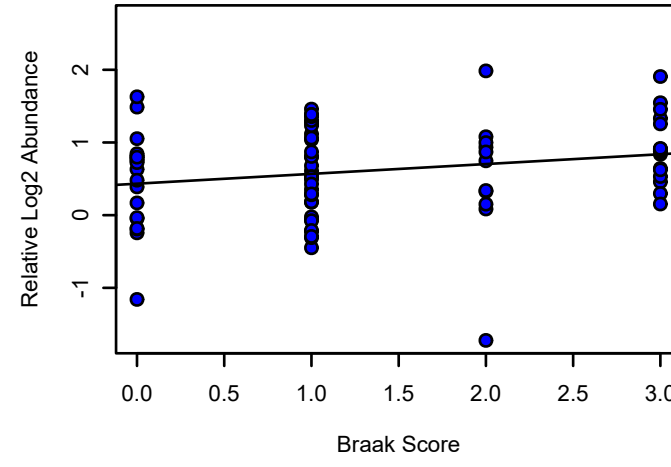

**bicor=0.18, p=0.075**  
**cor=0.17, p=0.091**

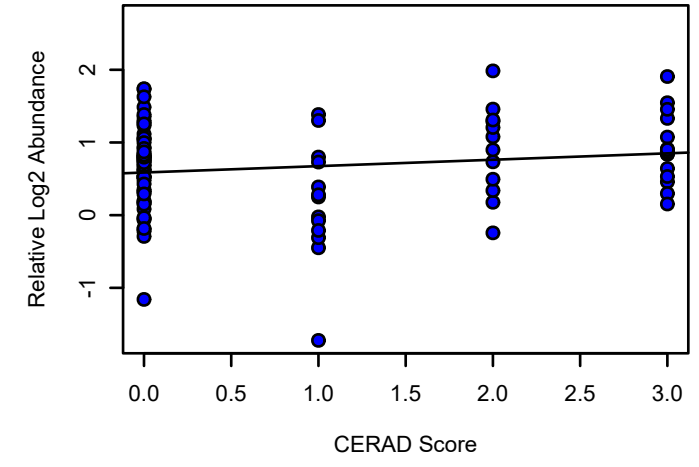

**ATP6V1B2 UPenn Mixed PRM**  
M1 turquoise MEGA module member  
K-W ANOVA p: 0.052

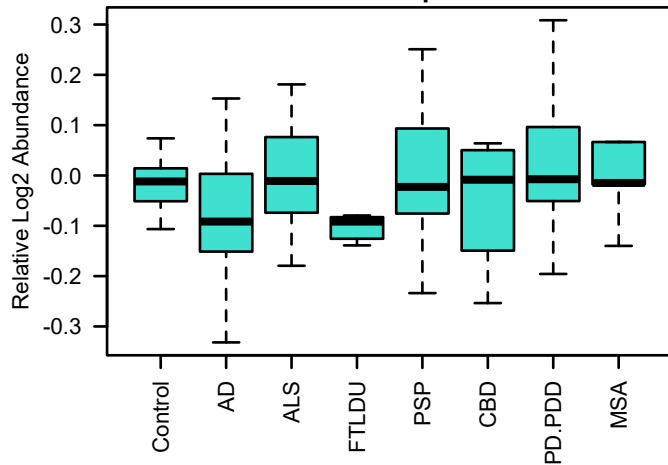

**ATP6V1B2 UPenn Mixed PRM**  
K-W ANOVA p: 0.11

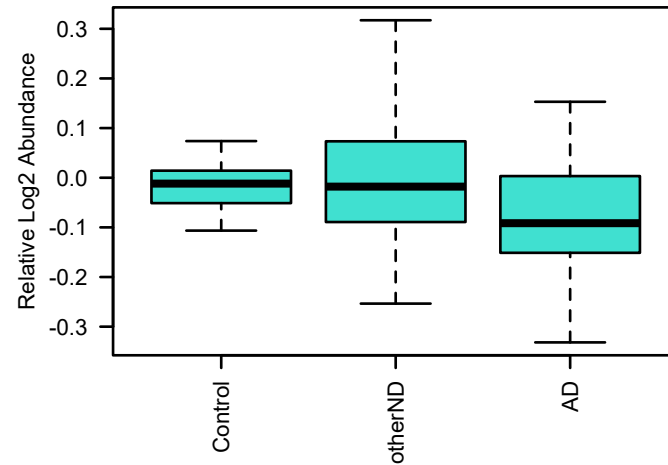

**bicor=-0.17, p=0.12**  
**cor=-0.17, p=0.12**

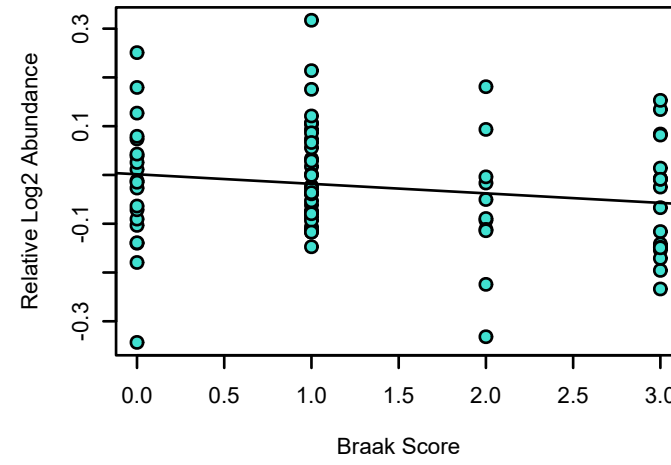

**bicor=-0.035, p=0.73**  
**cor=-0.02, p=0.84**

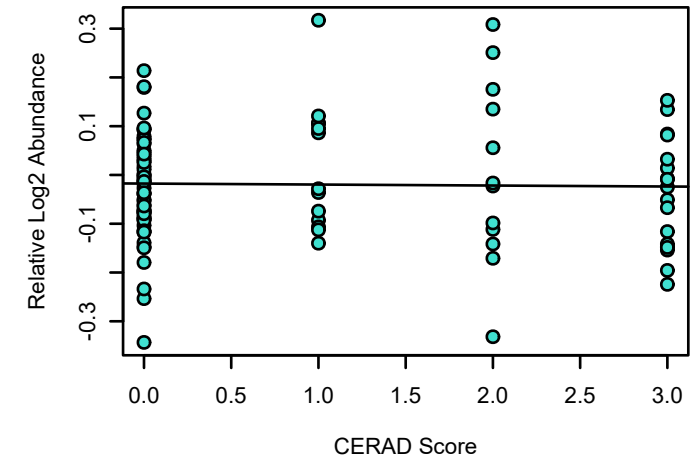

**ATP6V1C1 UPenn Mixed PRM**  
M1 turquoise MEGA module member  
K-W ANOVA p: 0.19

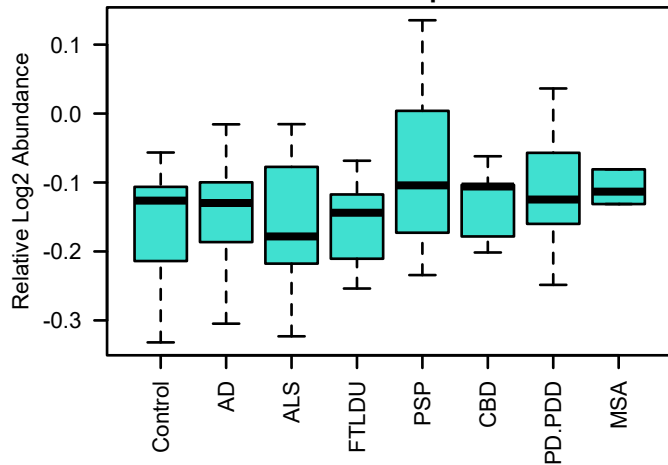

**ATP6V1C1 UPenn Mixed PRM**  
K-W ANOVA p: 0.32

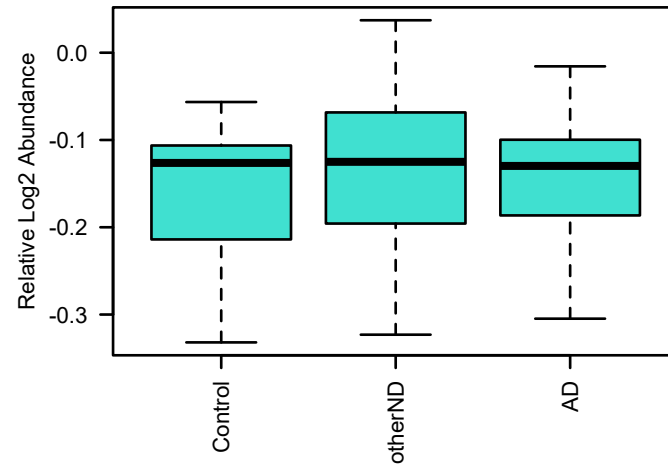

**bicor=0.014, p=0.9**  
**cor=0.0036, p=0.97**

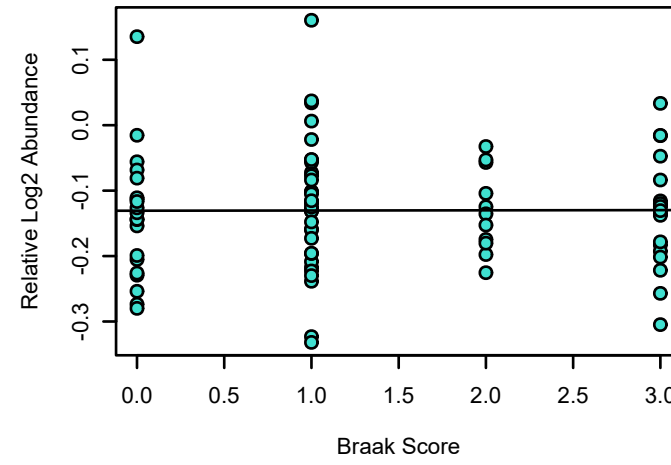

**bicor=-0.011, p=0.91**  
**cor=-0.0091, p=0.93**

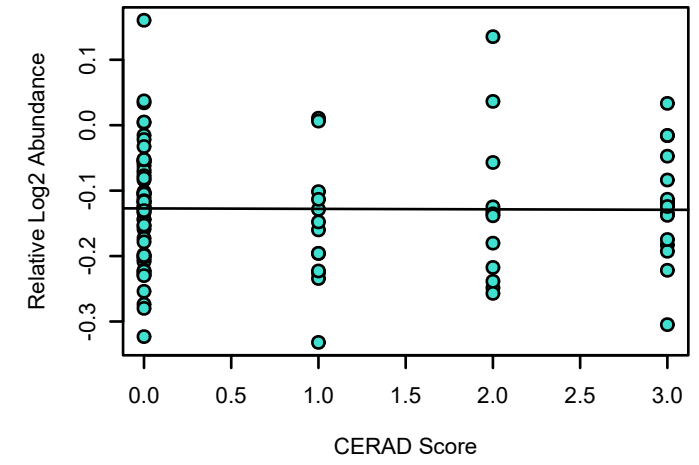



**CSR1 UPenn Mixed PRM**  
M4 yellow MEGA module member  
K-W ANOVA p: 0.0021

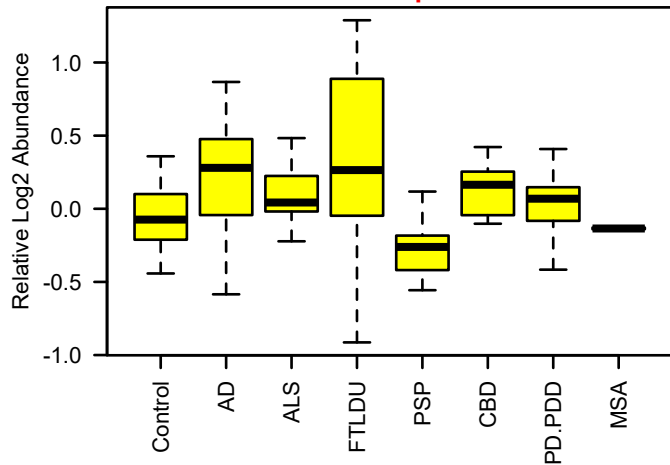

**CSR1 UPenn Mixed PRM**  
K-W ANOVA p: 0.08

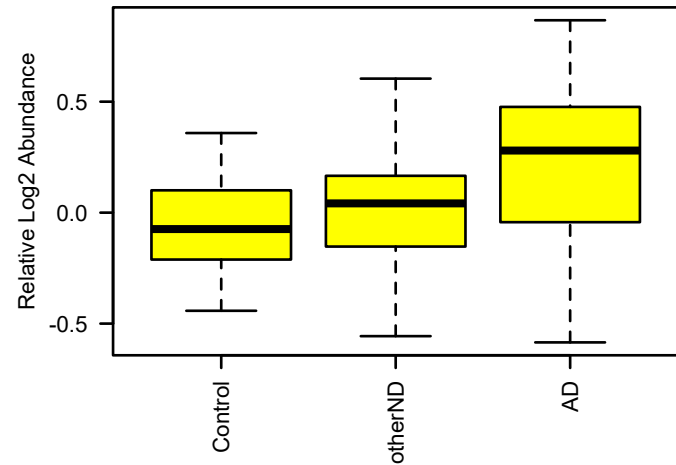

**bicor=0.15, p=0.18**  
**cor=0.14, p=0.2**

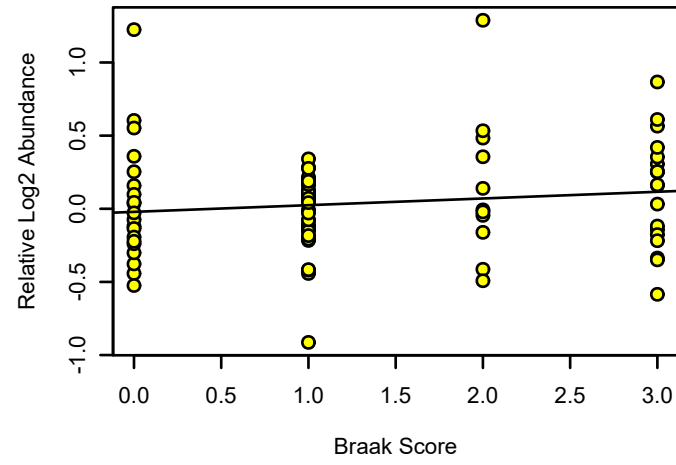

**bicor=0.17, p=0.084**  
**cor=0.14, p=0.16**

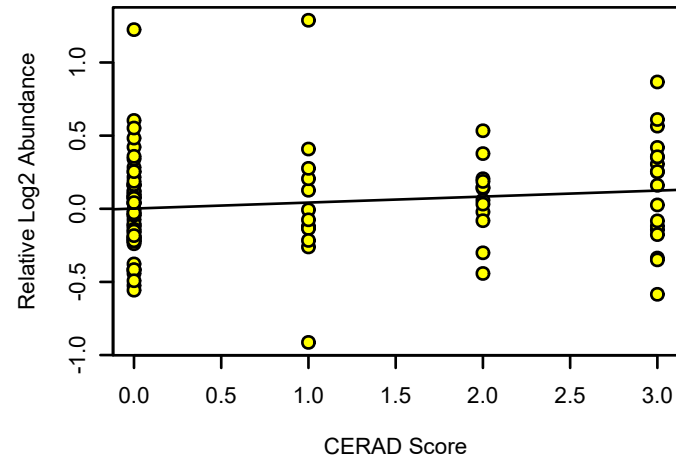

**SDHB UPenn Mixed PRM**  
M3 brown MEGA module member  
K-W ANOVA p: 0.11

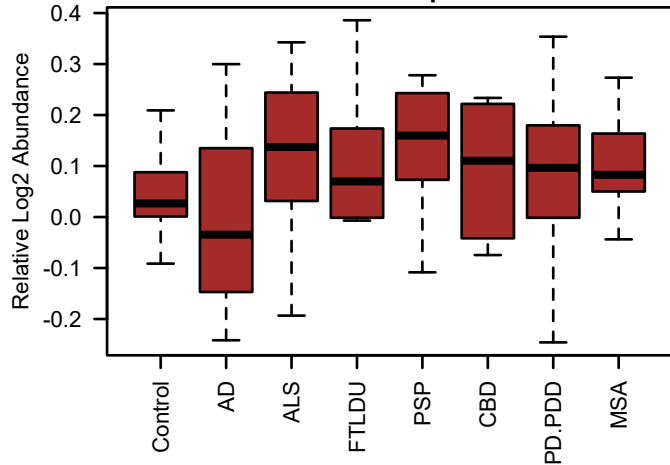

**SDHB UPenn Mixed PRM**  
K-W ANOVA p: 0.008

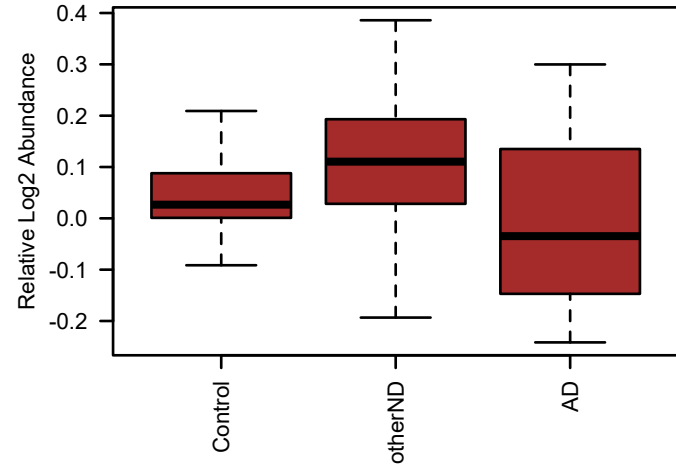

**bicor=-0.1, p=0.35**  
**cor=-0.16, p=0.15**

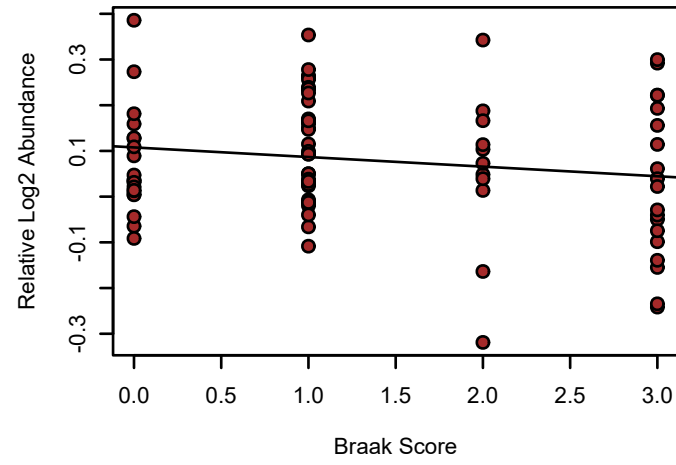

**bicor=-0.2, p=0.044**  
**cor=-0.22, p=0.028**

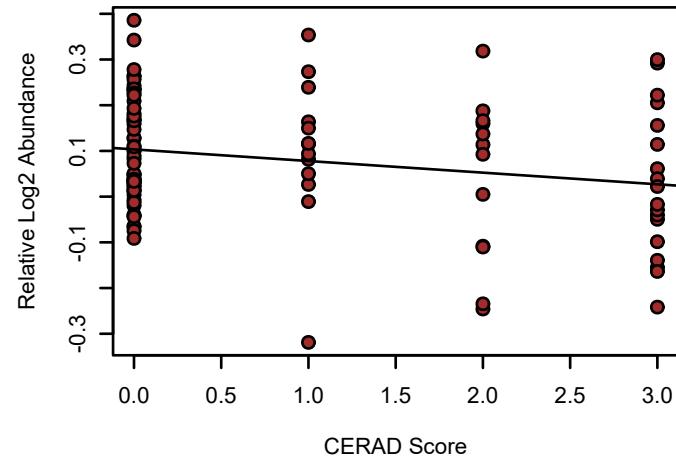

**HNRNPA2B1 UPenn Mixed PRM**  
M10 purple MEGA module member  
K-W ANOVA p: 1.1e-05

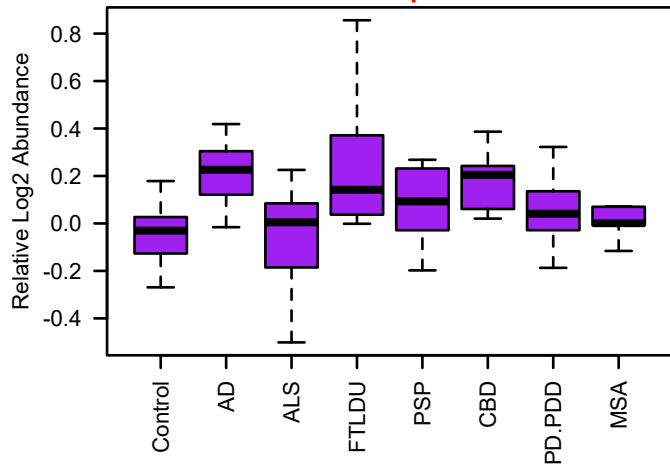

**HNRNPA2B1 UPenn Mixed PRM**  
K-W ANOVA p: 2e-04

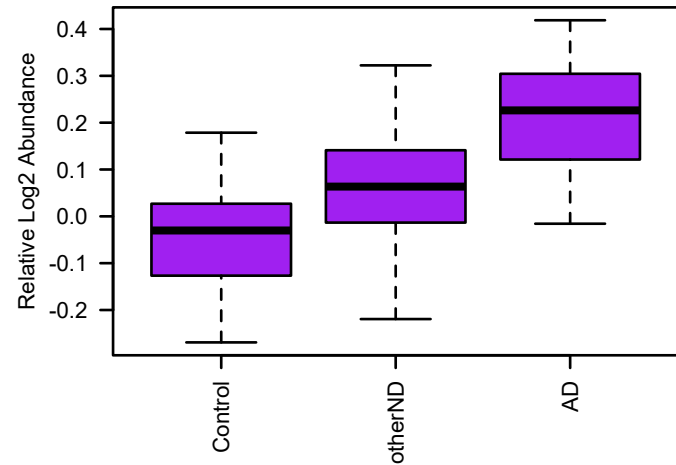

**bicor=0.45, p=1.7e-05**  
**cor=0.41, p=0.00011**

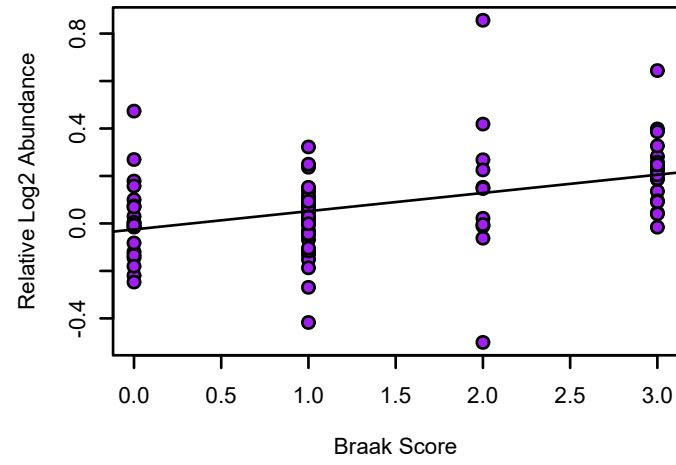

**bicor=0.31, p=0.0019**  
**cor=0.3, p=0.0024**

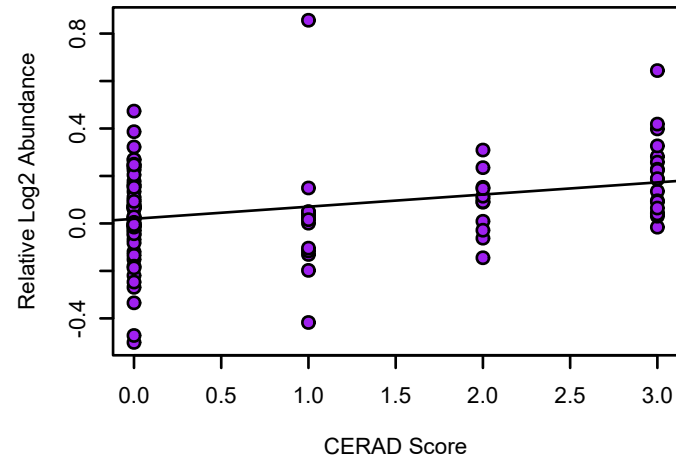

**UQCRC2 UPenn Mixed PRM**  
M3 brown MEGA module member  
K-W ANOVA p: 0.019

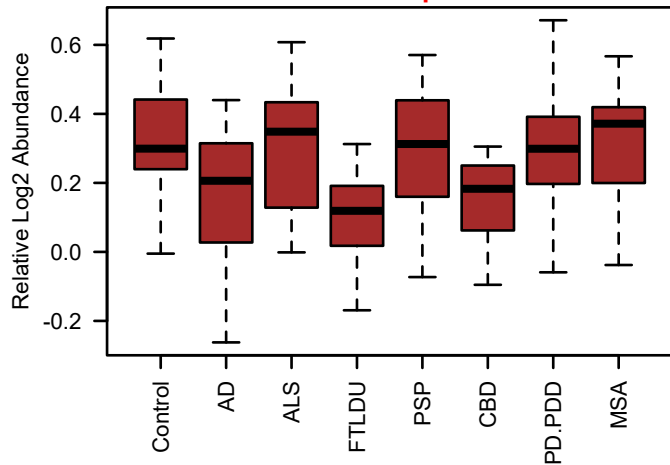

**UQCRC2 UPenn Mixed PRM**  
K-W ANOVA p: 0.043

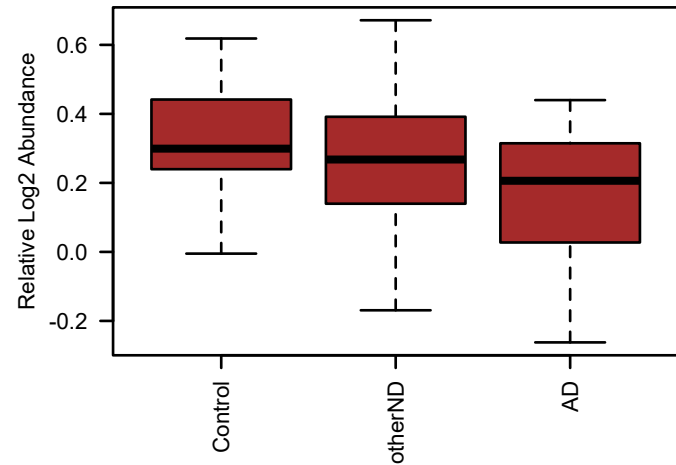

**bicor=-0.15, p=0.19**  
**cor=-0.19, p=0.083**

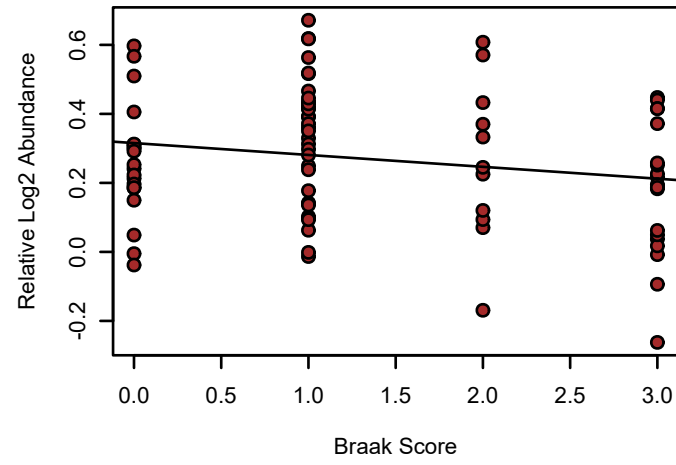

**bicor=-0.17, p=0.095**  
**cor=-0.17, p=0.091**

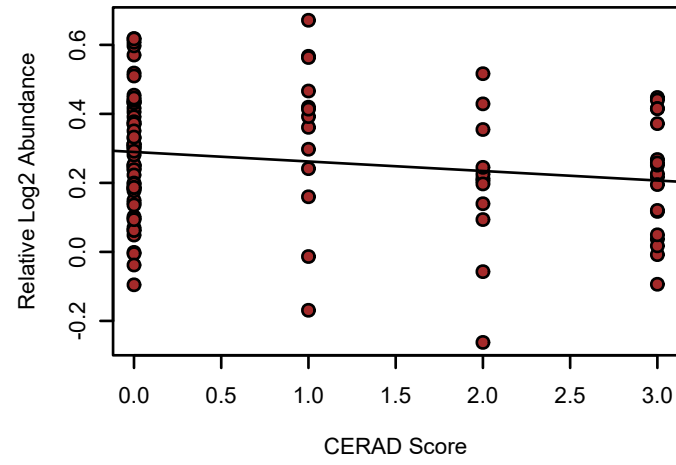

**SFPQ UPenn Mixed PRM**  
M10 purple MEGA module member  
K-W ANOVA p: 0.21

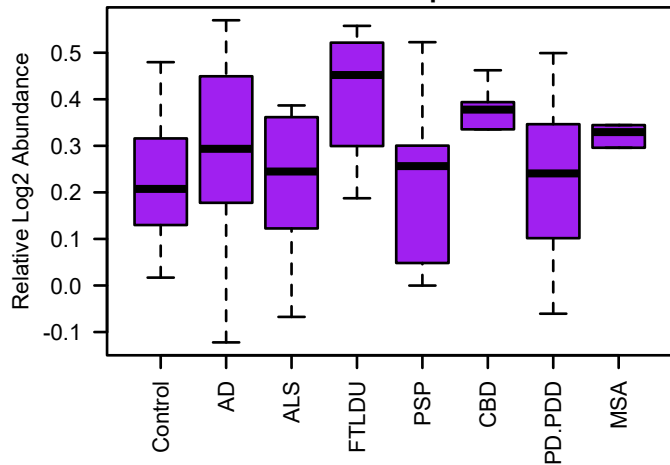

**SFPQ UPenn Mixed PRM**  
K-W ANOVA p: 0.9

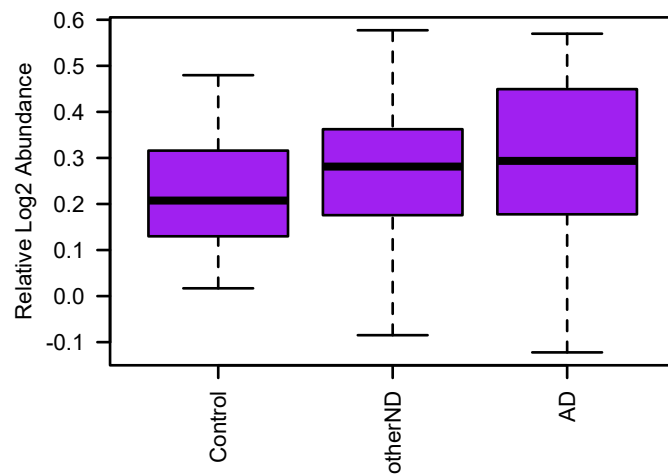

**bicor=0.14, p=0.22**  
**cor=0.13, p=0.24**

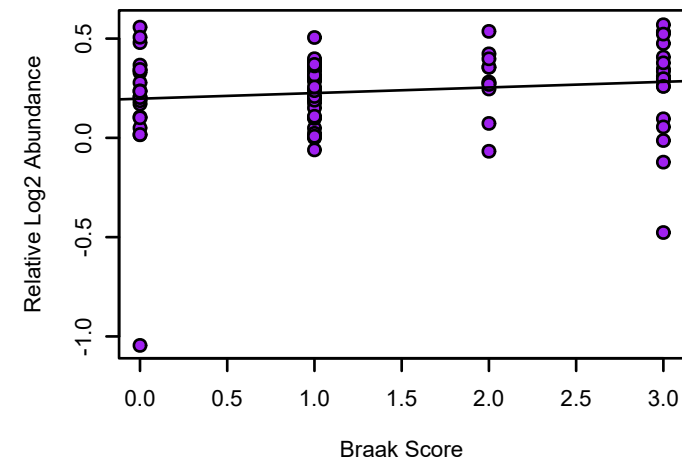

**bicor=0.033, p=0.75**  
**cor=0.006, p=0.95**

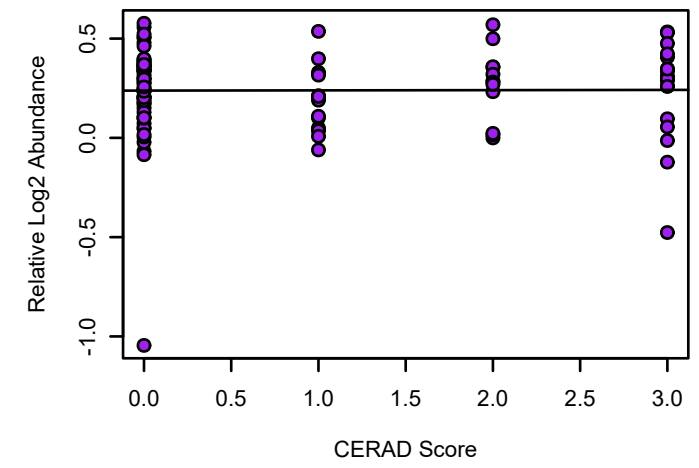

**CFL1 UPenn Mixed PRM**  
NA grey MEGA module member  
K-W ANOVA p: 0.00069

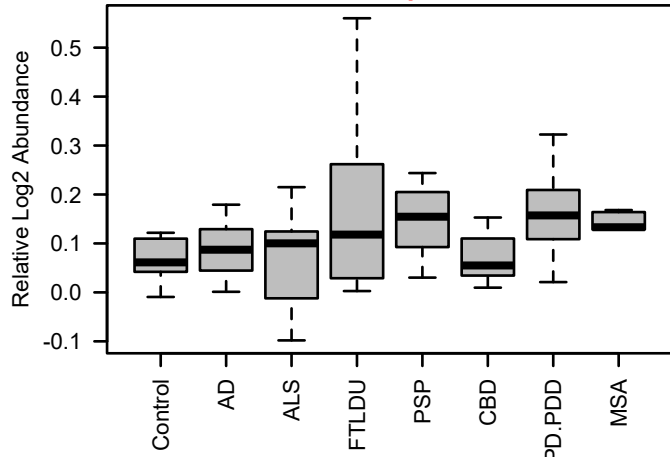

**CFL1 UPenn Mixed PRM**  
K-W ANOVA p: 0.0062

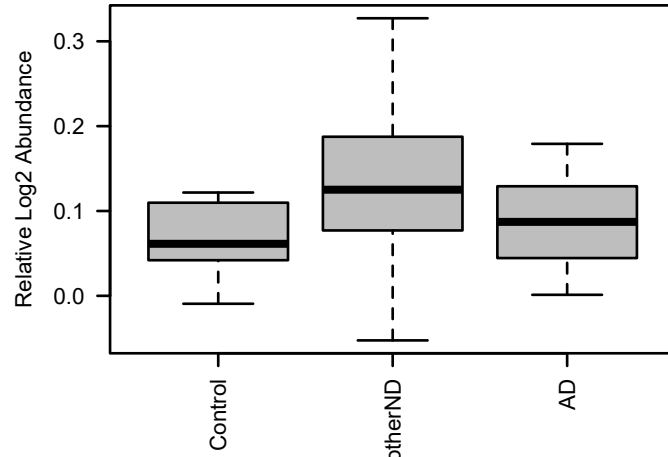

**bicor=0.026, p=0.81**  
**cor=0.056, p=0.61**

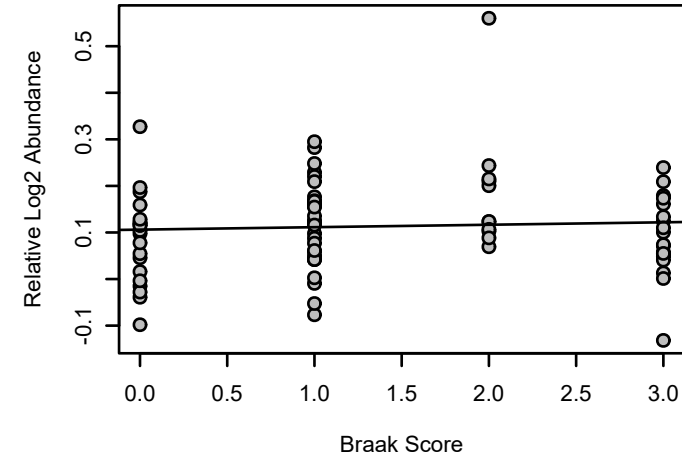

**bicor=-0.014, p=0.89**  
**cor=-0.026, p=0.8**

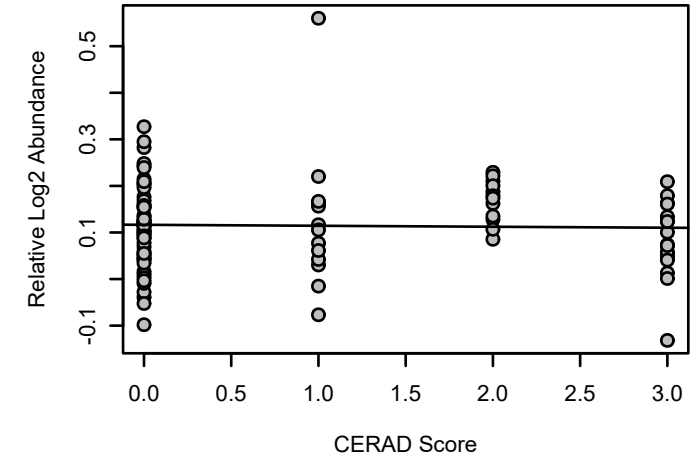

**ATP2B4 UPenn Mixed PRM**  
M1 turquoise MEGA module member  
K-W ANOVA p: 0.44

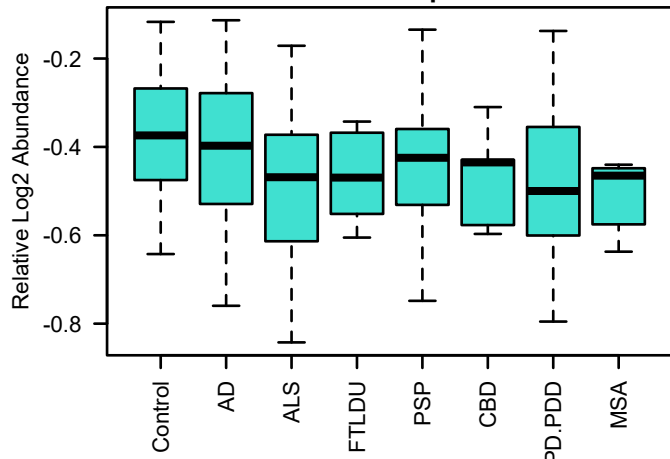

**ATP2B4 UPenn Mixed PRM**  
K-W ANOVA p: 0.067

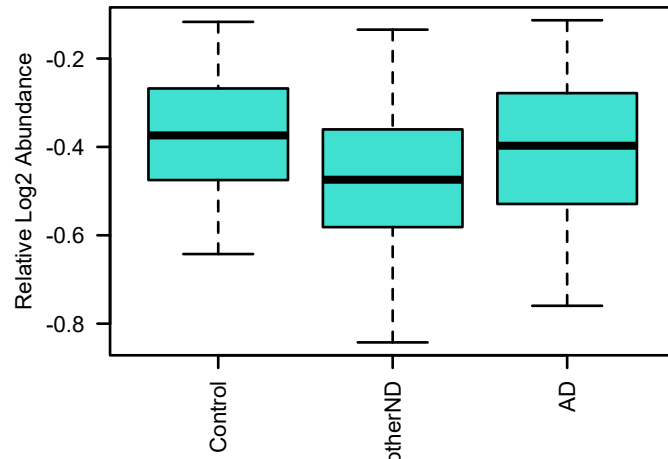

**bicor=0.049, p=0.66**  
**cor=0.055, p=0.62**

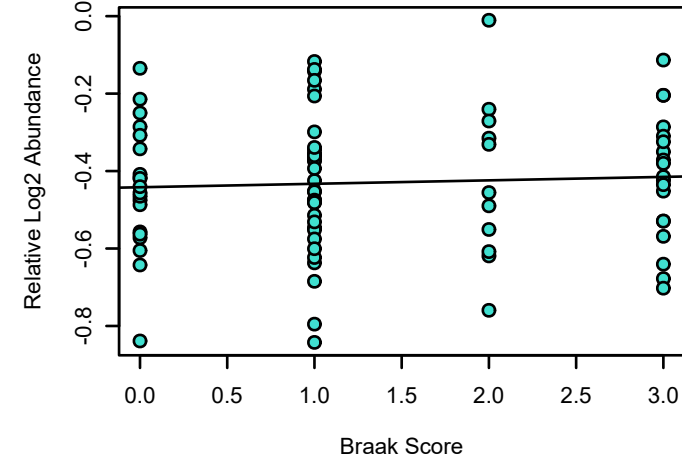

**bicor=0.097, p=0.34**  
**cor=0.11, p=0.28**

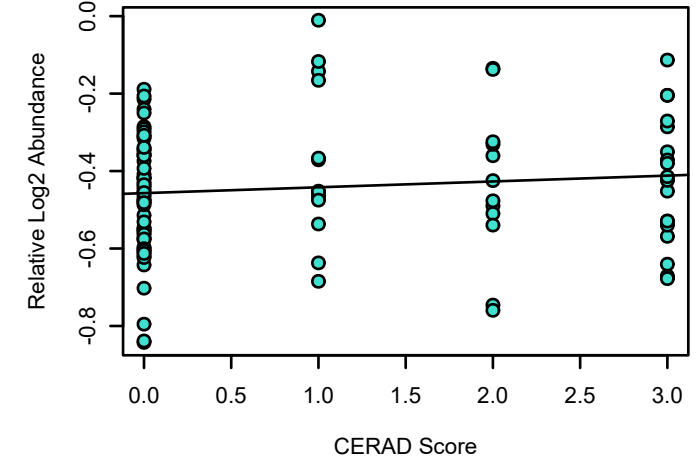

**ATP5F1 UPenn Mixed PRM**  
M3 brown MEGA module member  
K-W ANOVA p: 0.11

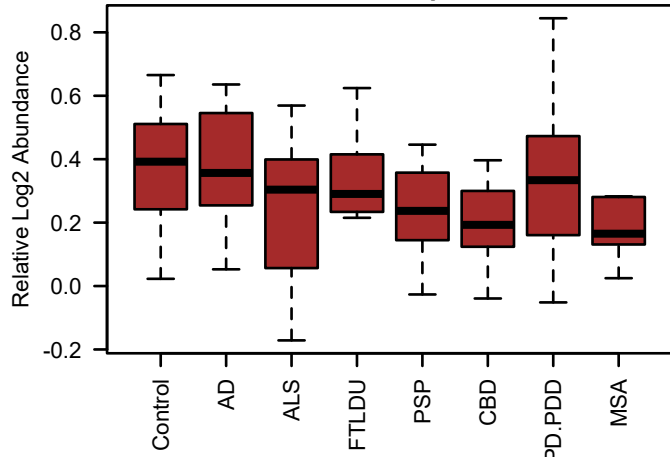

**ATP5F1 UPenn Mixed PRM**  
K-W ANOVA p: 0.041

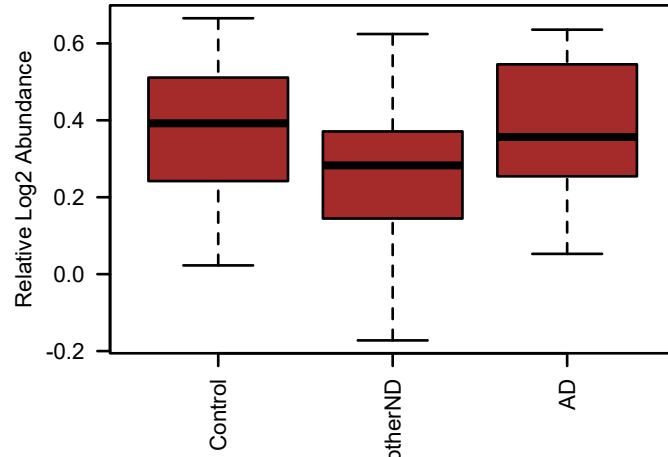

**bicor=0.047, p=0.67**  
**cor=0.069, p=0.53**

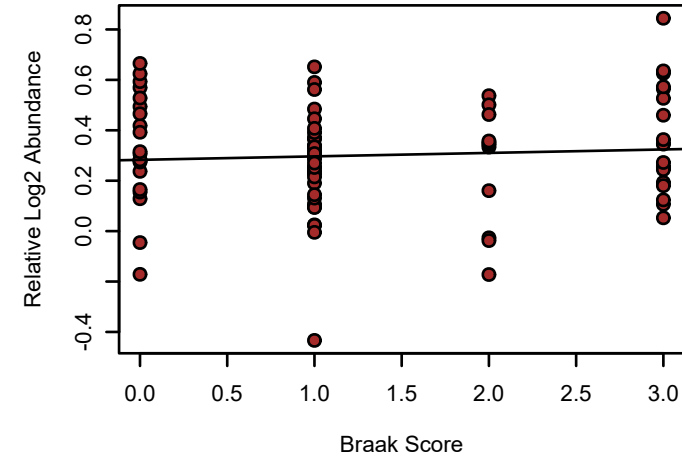

**bicor=0.15, p=0.15**  
**cor=0.13, p=0.2**

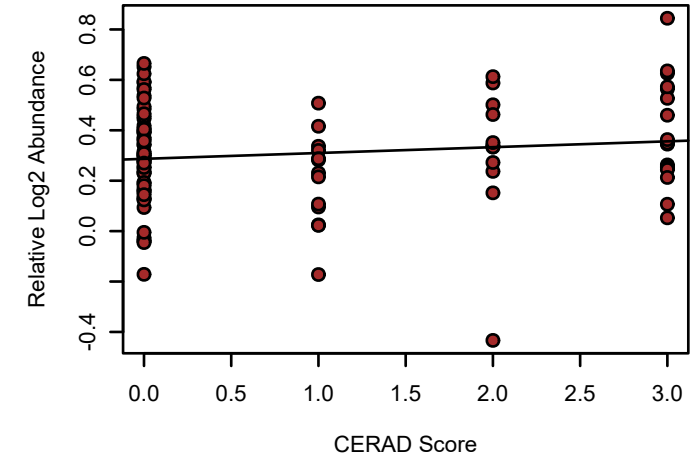

**DNAJB2 UPenn Mixed PRM**  
NA grey MEGA module member  
K-W ANOVA p: 0.0094

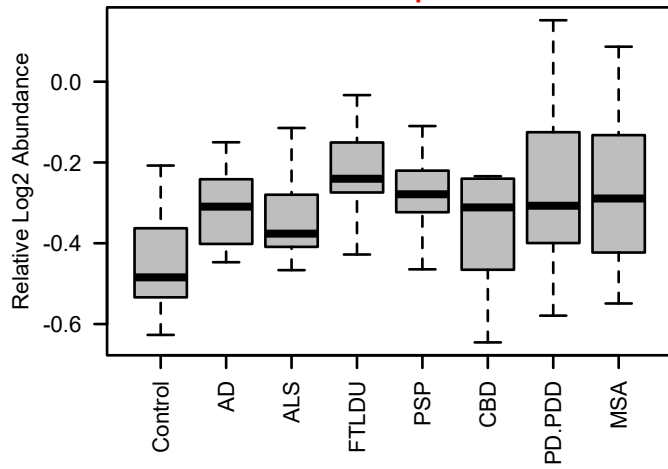

**DNAJB2 UPenn Mixed PRM**  
K-W ANOVA p: 0.0022

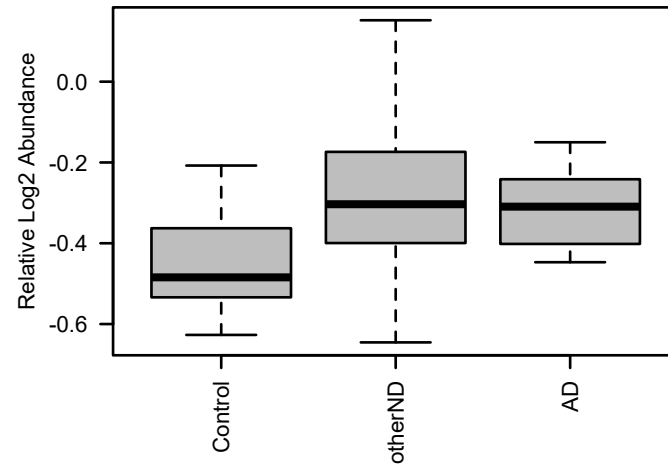

**bicor=0.21, p=0.051**  
**cor=0.21, p=0.055**

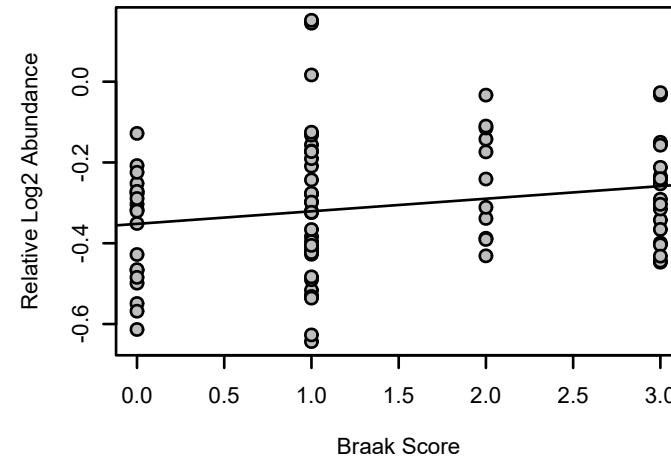

**bicor=0.18, p=0.072**  
**cor=0.16, p=0.11**

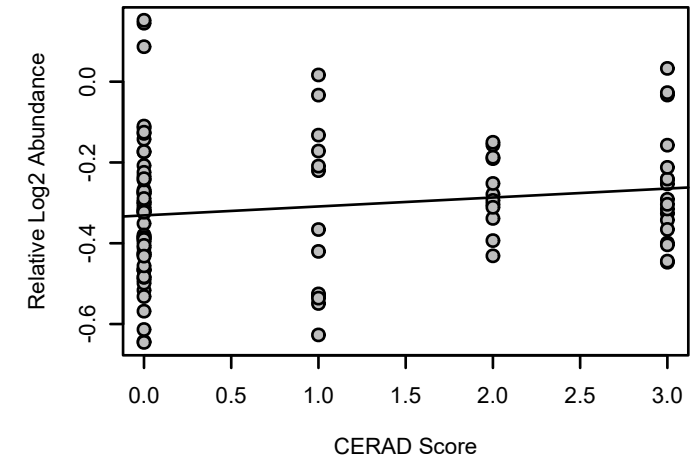

**ATP5A1 UPenn Mixed PRM**  
M3 brown MEGA module member  
K-W ANOVA p: 0.52

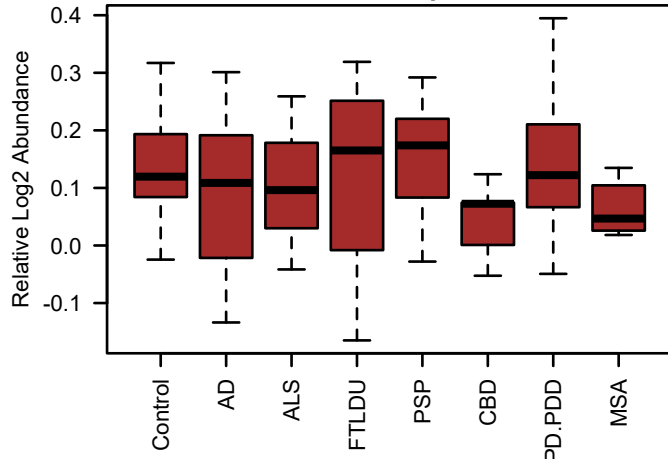

**ATP5A1 UPenn Mixed PRM**  
K-W ANOVA p: 0.52

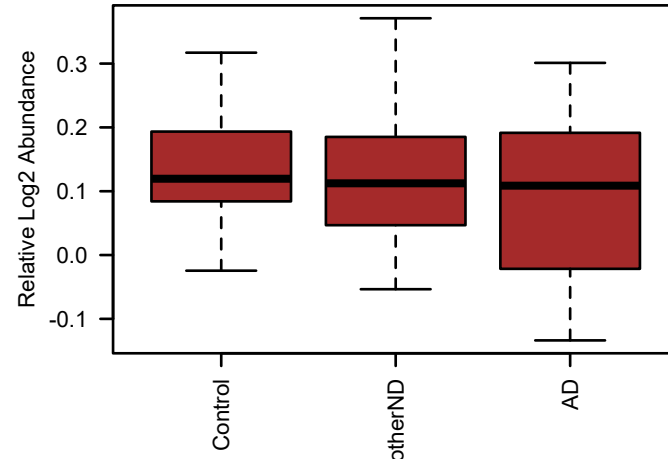

**bicor=-0.092, p=0.4**  
**cor=-0.12, p=0.28**

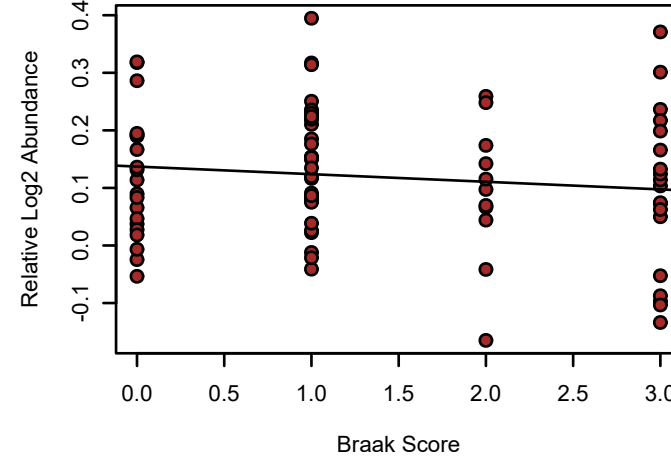

**bicor=-0.083, p=0.41**  
**cor=-0.094, p=0.35**

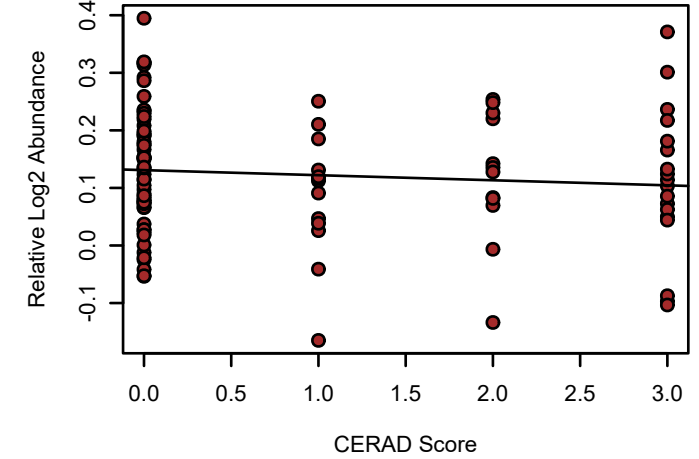

**MSN UPenn Mixed PRM**  
M4 yellow MEGA module member  
K-W ANOVA p: 1.7e-06

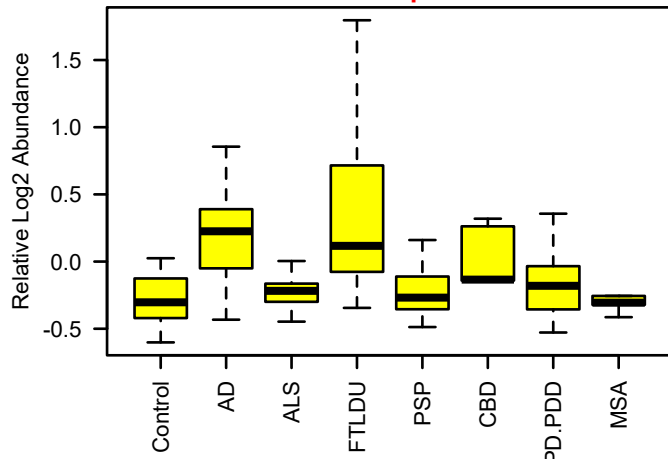

**MSN UPenn Mixed PRM**  
K-W ANOVA p: 0.00014

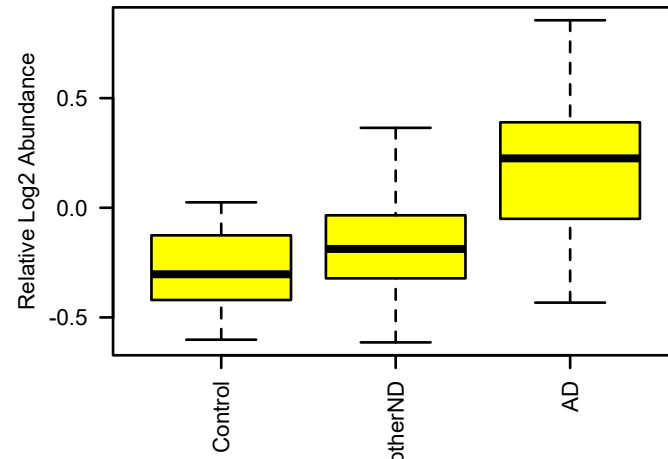

**bicor=0.46, p=1e-05**  
**cor=0.4, p=0.00016**

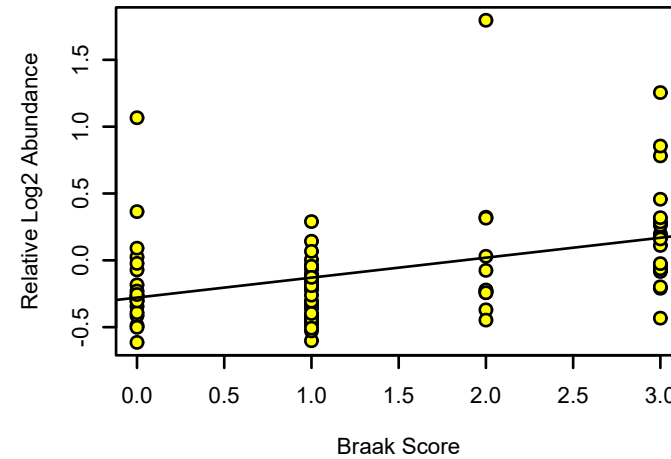

**bicor=0.31, p=0.0019**  
**cor=0.3, p=0.0024**

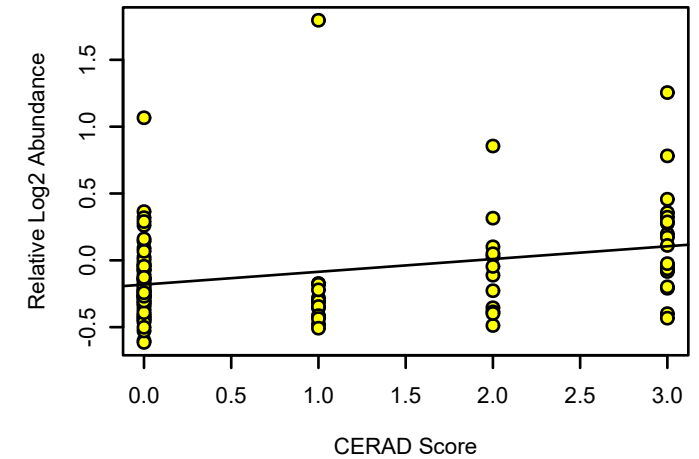

**RPL13 UPenn Mixed PRM**  
M7 black MEGA module member  
K-W ANOVA p: 0.18

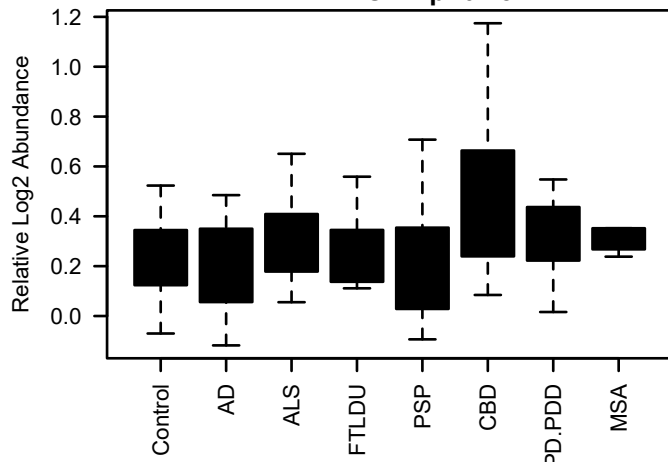

**RPL13 UPenn Mixed PRM**  
K-W ANOVA p: 0.17

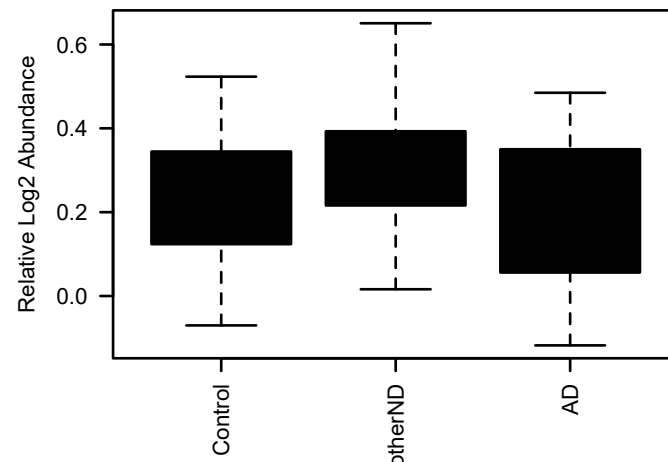

**bicor=-0.09, p=0.42**  
**cor=0.0049, p=0.96**

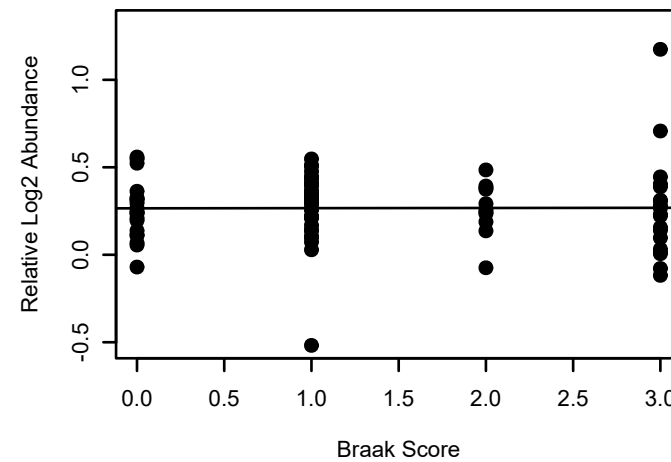

**bicor=-0.14, p=0.16**  
**cor=-0.19, p=0.058**

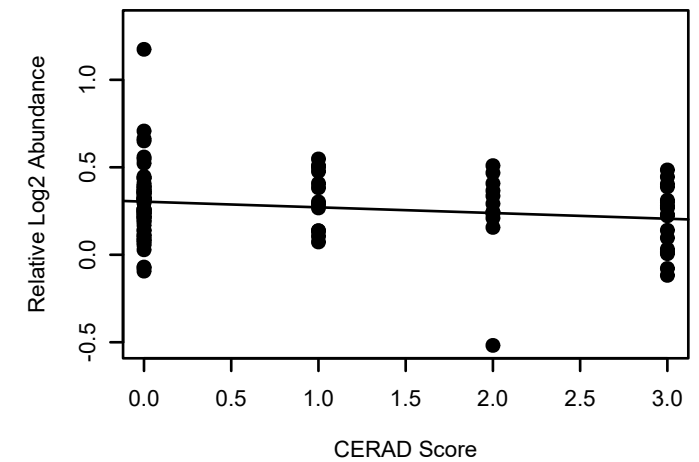



**MAP4 UPenn Mixed PRM**  
**M10 purple MEGA module member**  
**K-W ANOVA p: 0.019**

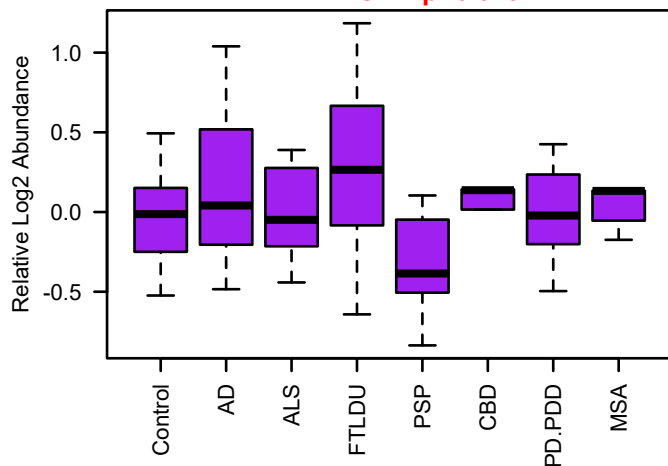

**MAP4 UPenn Mixed PRM**  
**K-W ANOVA p: 0.2**

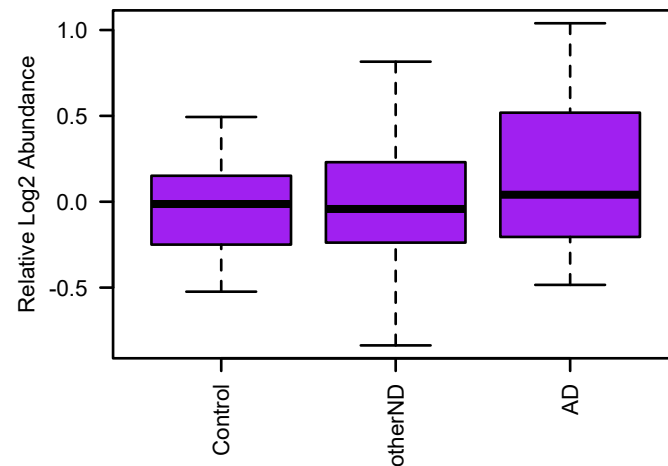

**bicor=0.13, p=0.24**  
**cor=0.15, p=0.17**

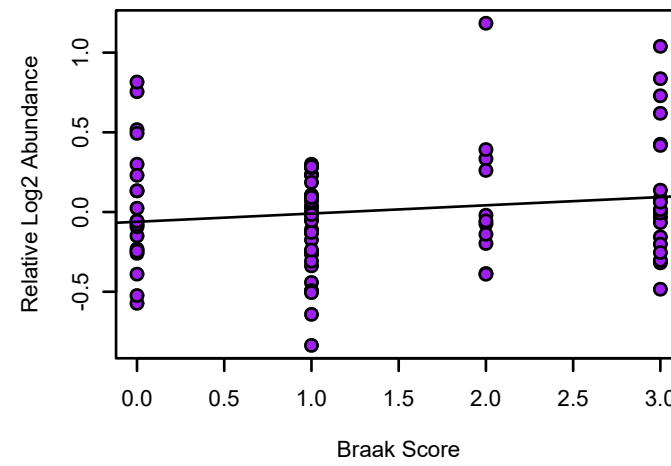

**bicor=0.13, p=0.2**  
**cor=0.15, p=0.14**

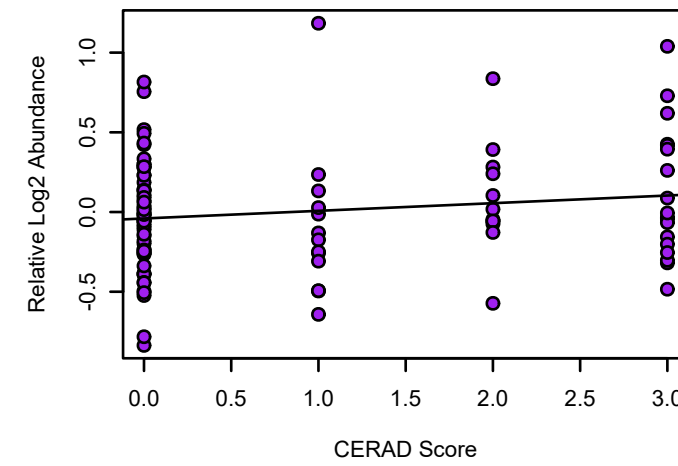

**NDUFS1 UPenn Mixed PRM**  
**M3 brown MEGA module member**  
**K-W ANOVA p: 0.00028**

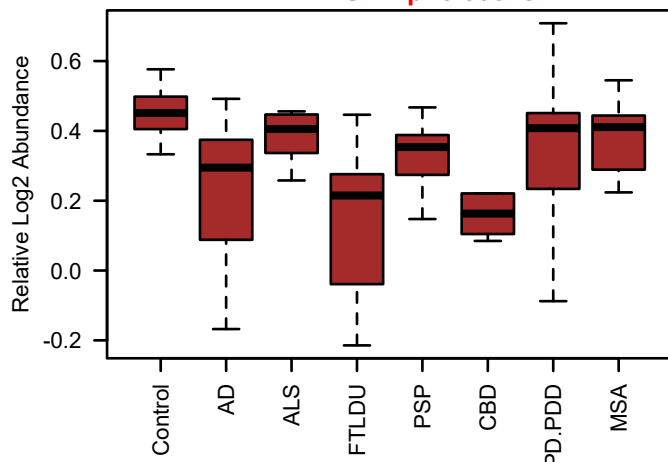

**NDUFS1 UPenn Mixed PRM**  
**K-W ANOVA p: 0.0034**

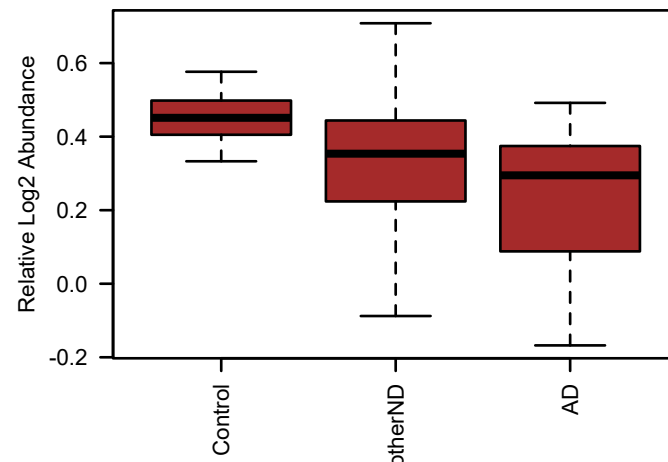

**bicor=-0.37, p=0.00058**  
**cor=-0.33, p=0.0022**

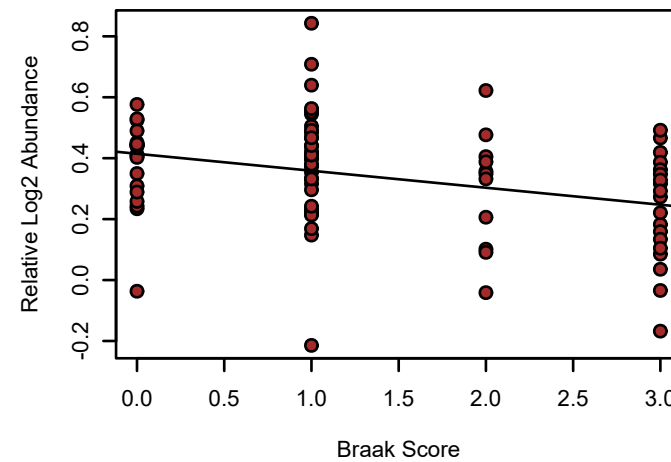

**bicor=-0.2, p=0.041**  
**cor=-0.24, p=0.016**

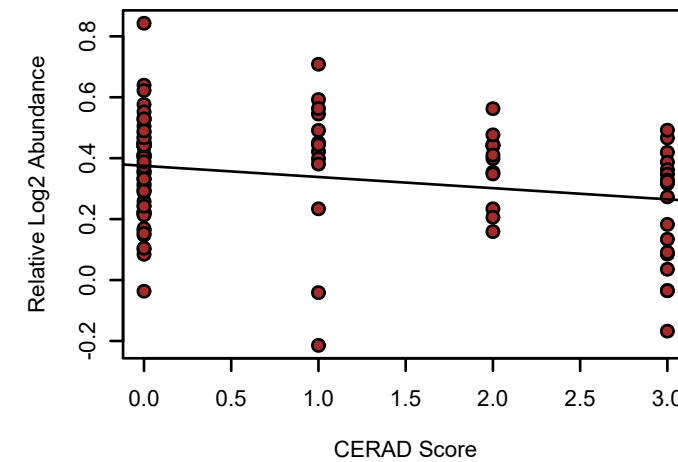

**MAPK1 UPenn Mixed PRM**  
**M4 yellow MEGA module member**  
**K-W ANOVA p: 1.3e-05**

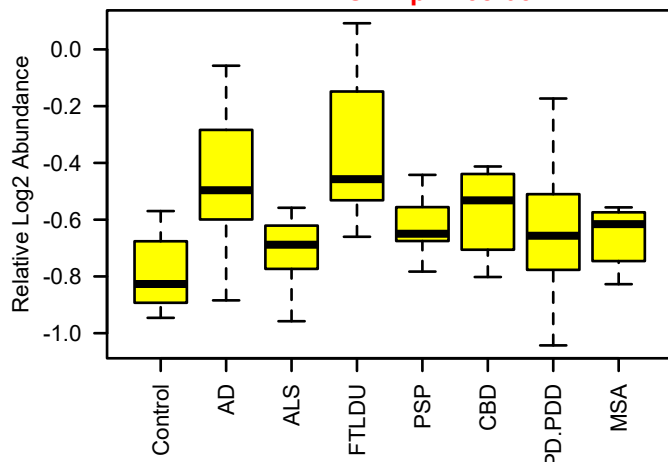

**MAPK1 UPenn Mixed PRM**  
**K-W ANOVA p: 9.7e-05**

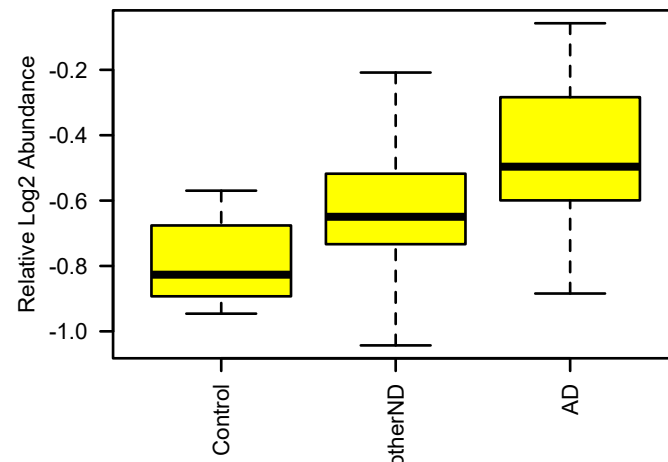

**bicor=0.41, p=0.00012**  
**cor=0.36, p=0.00077**

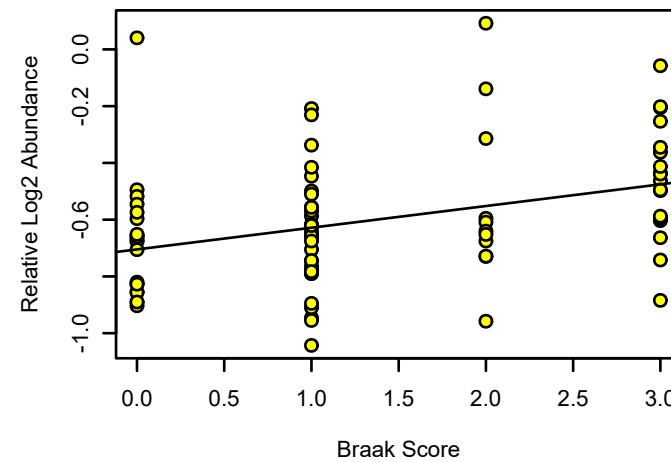

**bicor=0.3, p=0.0022**  
**cor=0.27, p=0.0066**

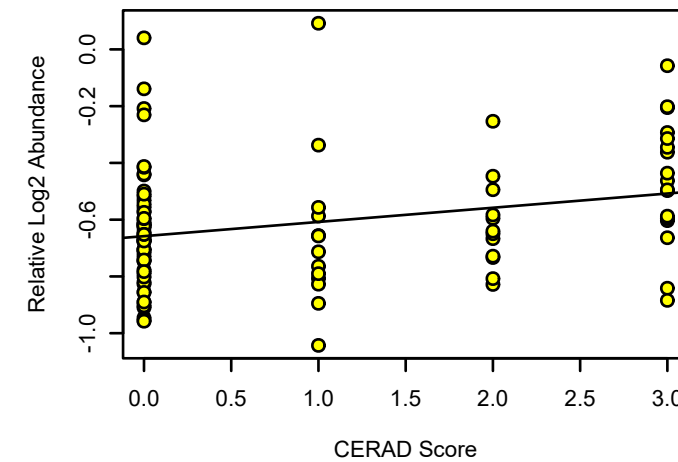

**PRDX6 UPenn Mixed PRM**  
**M4 yellow MEGA module member**  
**K-W ANOVA p: 3.4e-05**

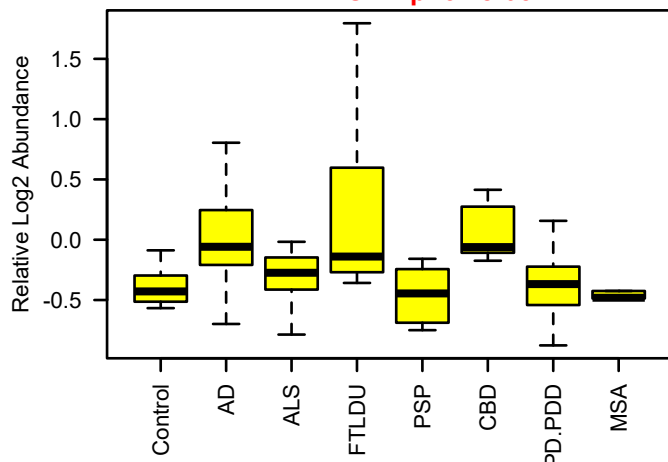

**PRDX6 UPenn Mixed PRM**  
**K-W ANOVA p: 0.0044**

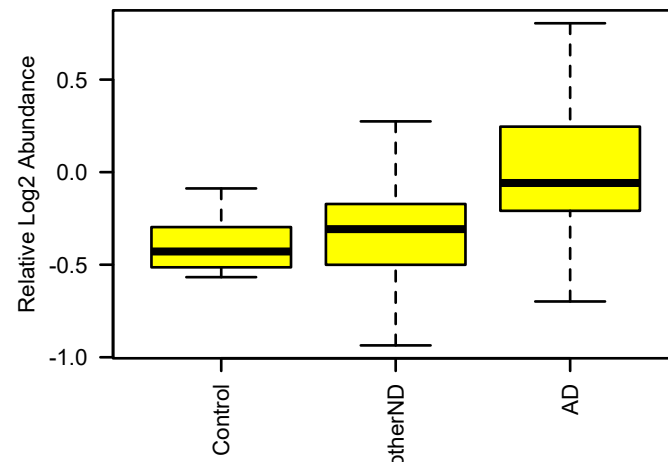

**bicor=0.33, p=0.0024**  
**cor=0.32, p=0.003**

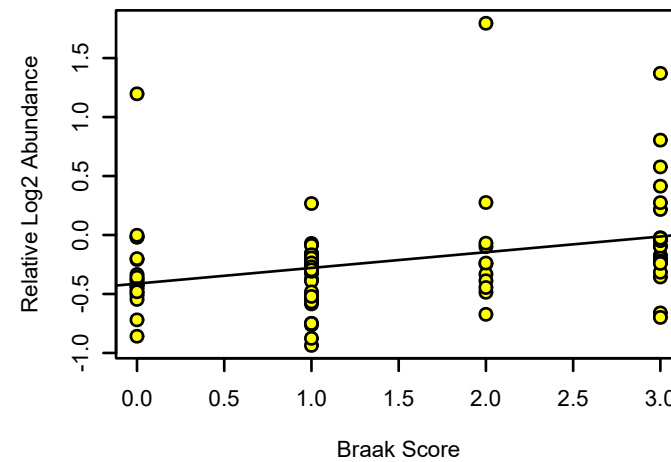

**bicor=0.23, p=0.021**  
**cor=0.21, p=0.036**

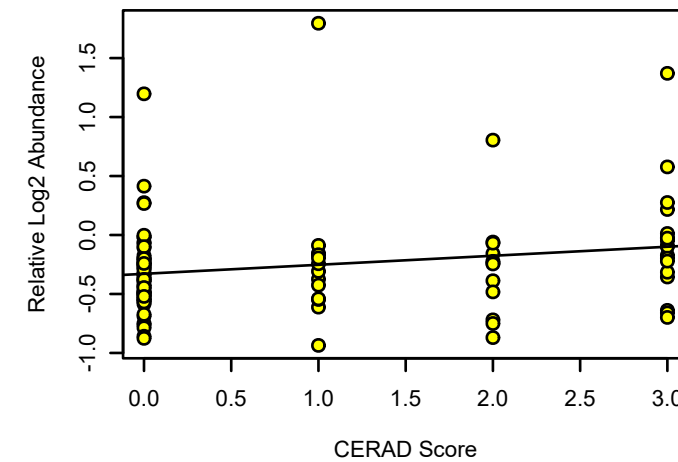

**PPP2R1A UPenn Mixed PRM**  
M12 tan MEGA module member  
K-W ANOVA p: 0.064

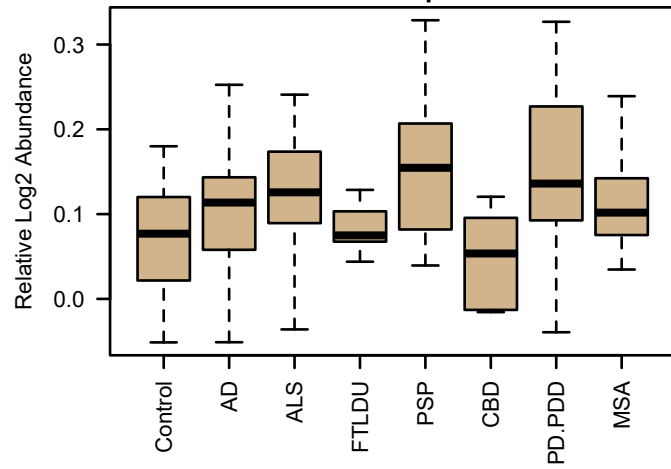

**PPP2R1A UPenn Mixed PRM**  
K-W ANOVA p: 0.033

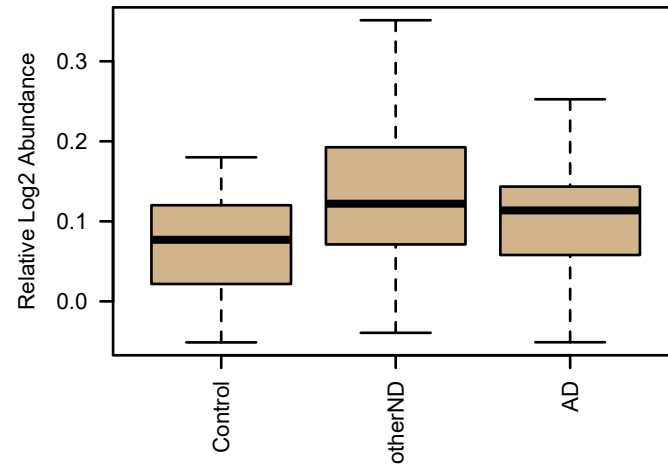

**bicor=0.13, p=0.23**  
**cor=0.12, p=0.28**

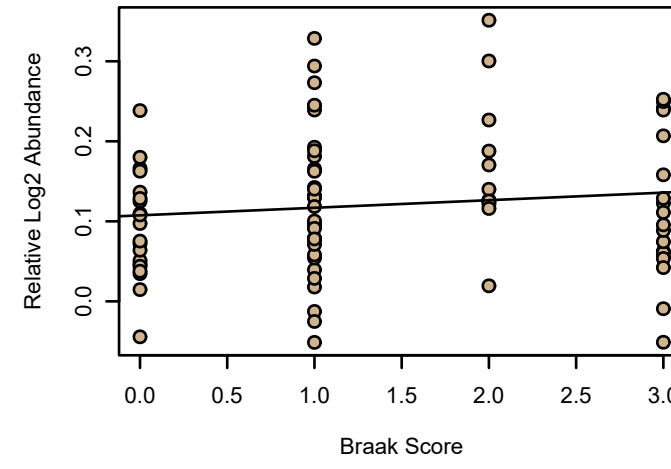

**bicor=0.015, p=0.88**  
**cor=0.015, p=0.88**

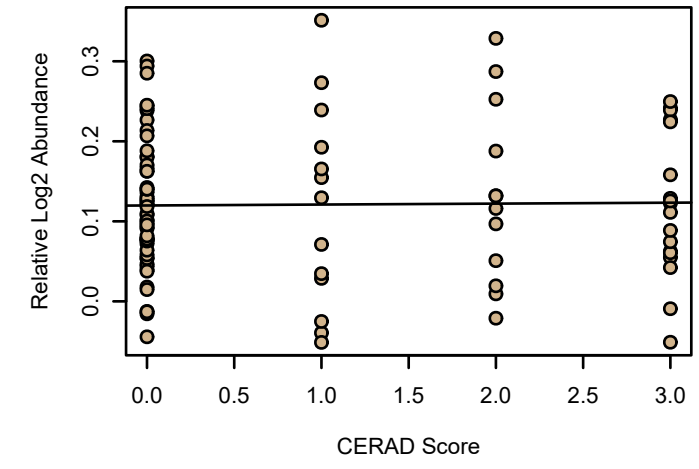

**SDHA UPenn Mixed PRM**  
M3 brown MEGA module member  
K-W ANOVA p: 0.0015

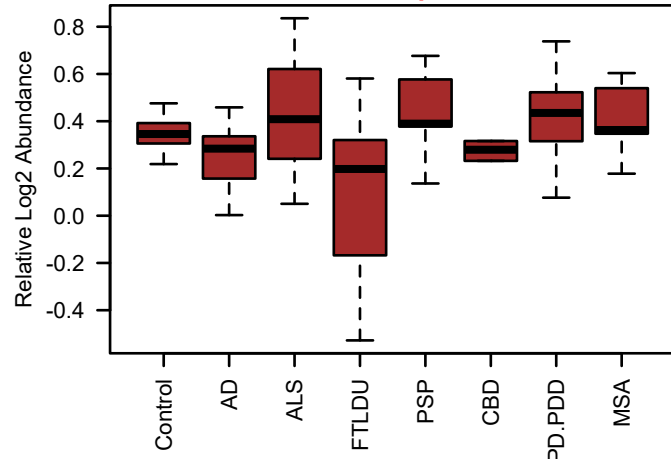

**SDHA UPenn Mixed PRM**  
K-W ANOVA p: 0.11

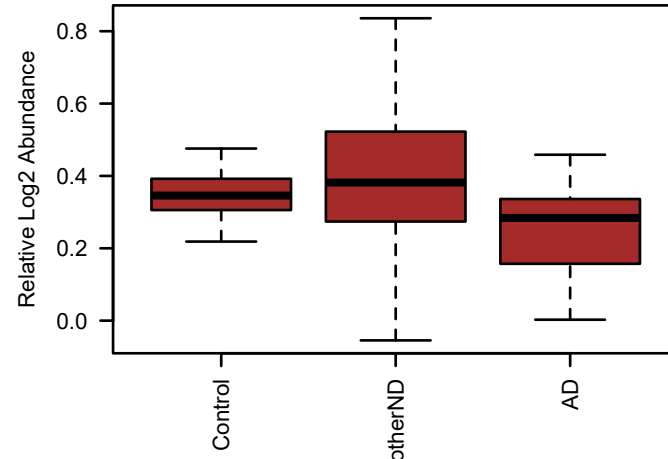

**bicor=-0.14, p=0.19**  
**cor=-0.15, p=0.17**

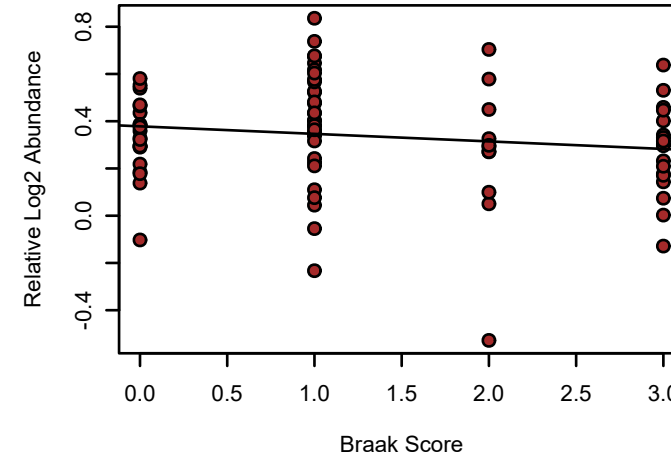

**bicor=-0.078, p=0.44**  
**cor=-0.078, p=0.44**

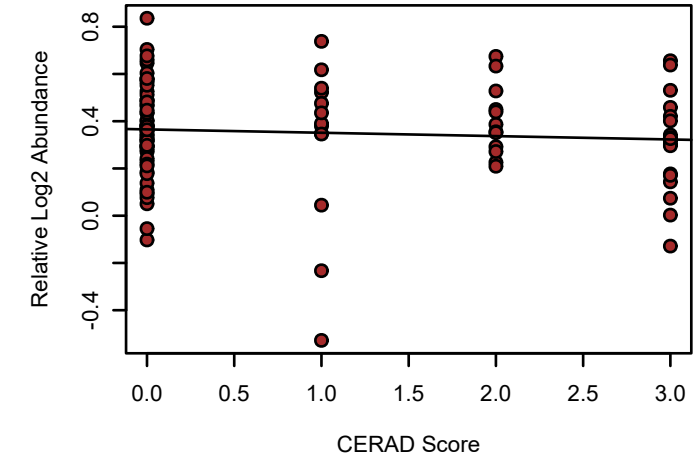

**PRKAR2B UPenn Mixed PRM**  
M1 turquoise MEGA module member  
K-W ANOVA p: 0.33

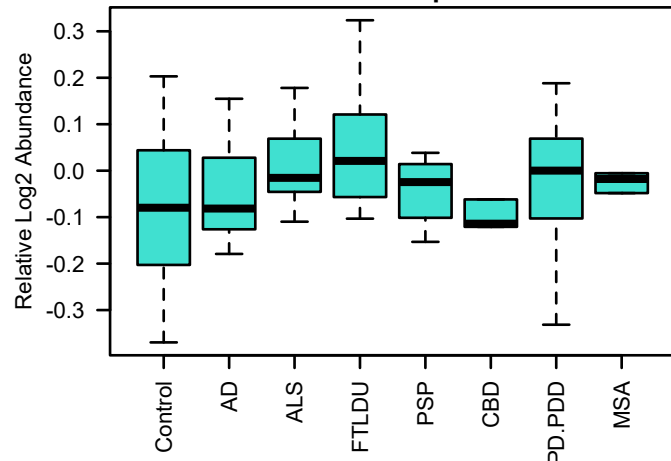

**PRKAR2B UPenn Mixed PRM**  
K-W ANOVA p: 0.13

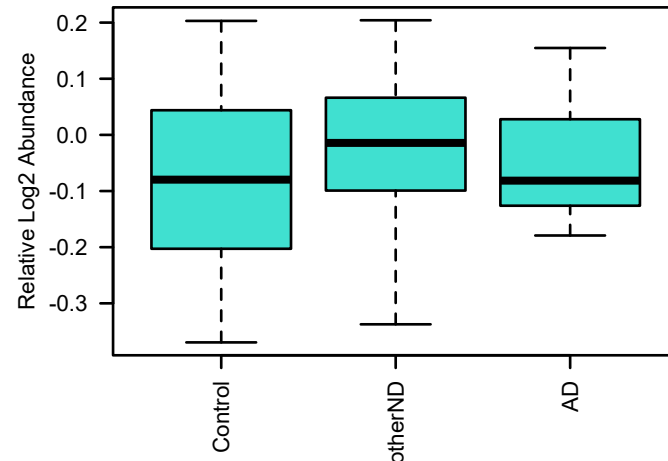

**bicor=-0.0048, p=0.97**  
**cor=-0.013, p=0.91**

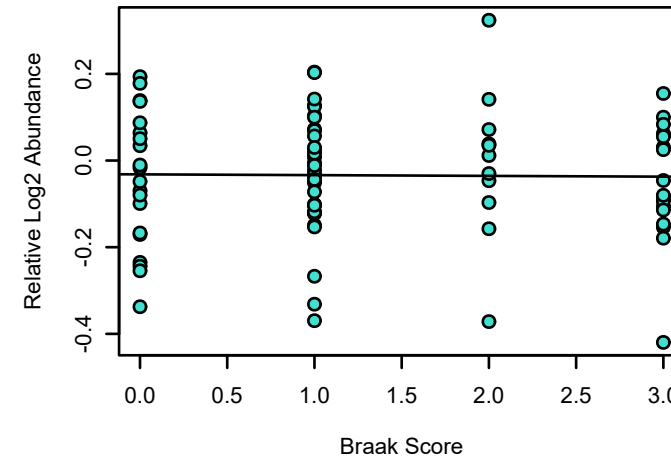

**bicor=0.093, p=0.36**  
**cor=0.11, p=0.28**

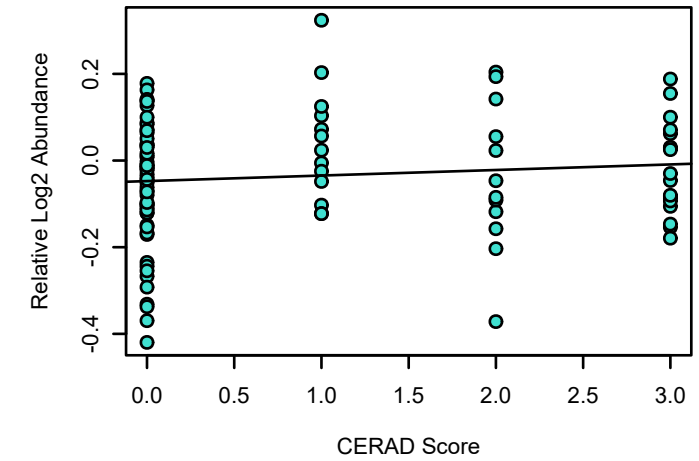

**DNAJA1 UPenn Mixed PRM**  
M11 greenyellow MEGA module member  
K-W ANOVA p: 3.2e-05

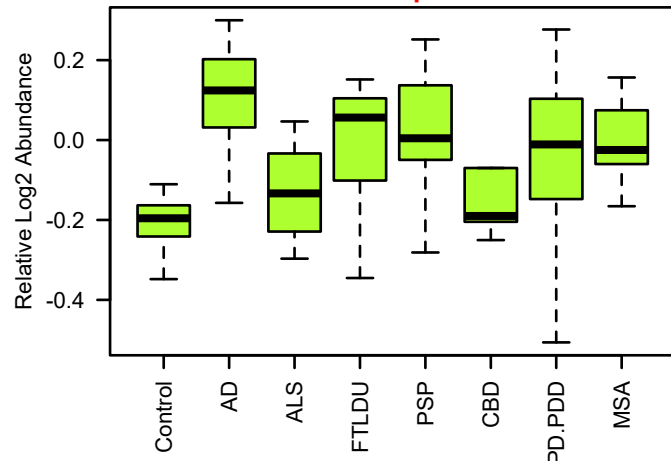

**DNAJA1 UPenn Mixed PRM**  
K-W ANOVA p: 1.6e-05

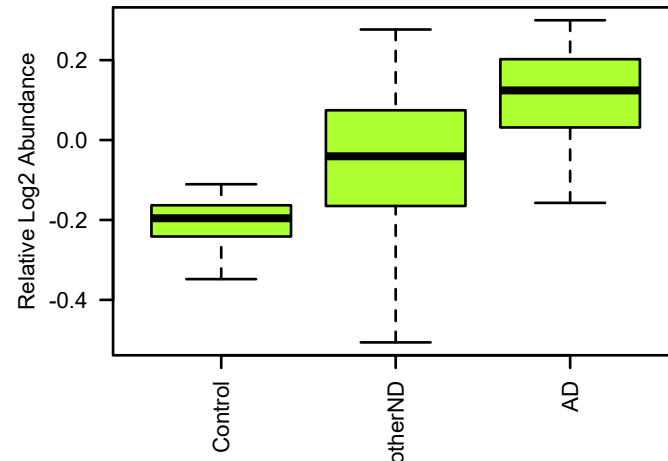

**bicor=0.43, p=4.1e-05**  
**cor=0.46, p=1.1e-05**

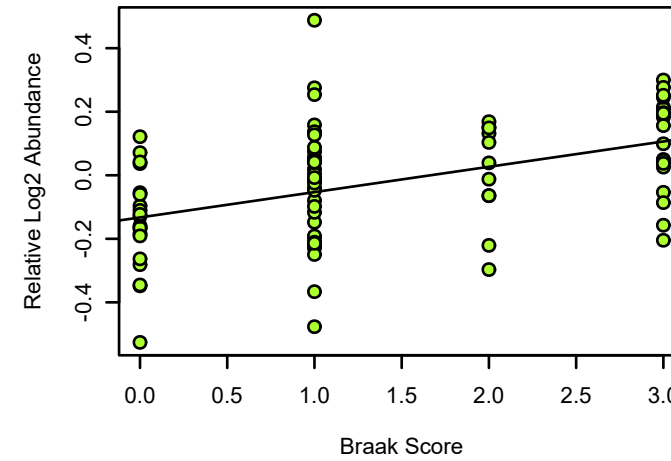

**bicor=0.33, p=0.00096**  
**cor=0.31, p=0.0017**

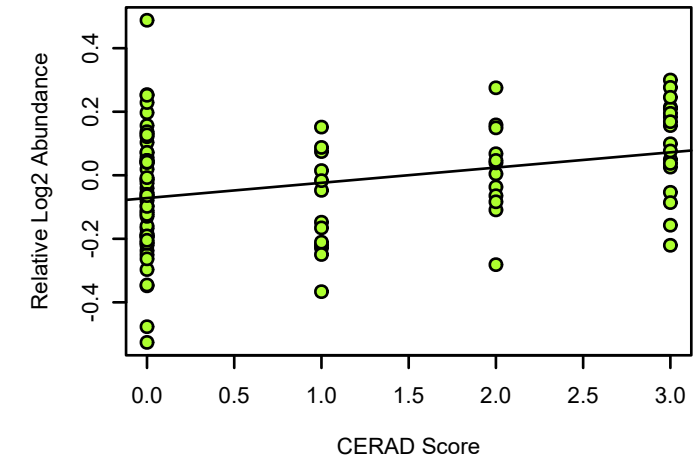

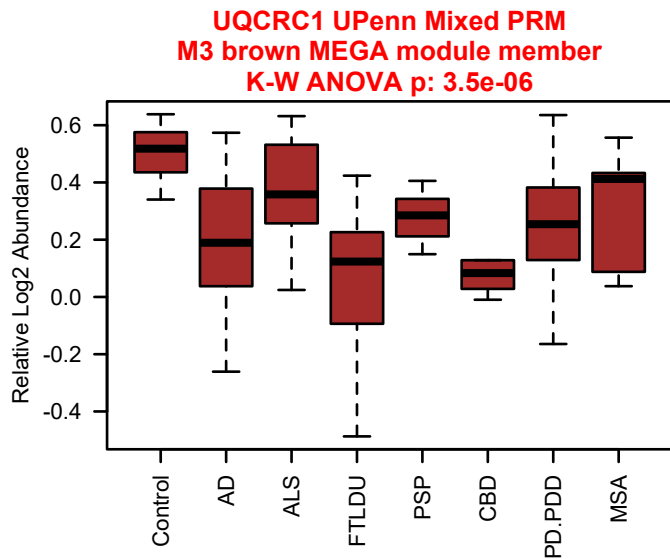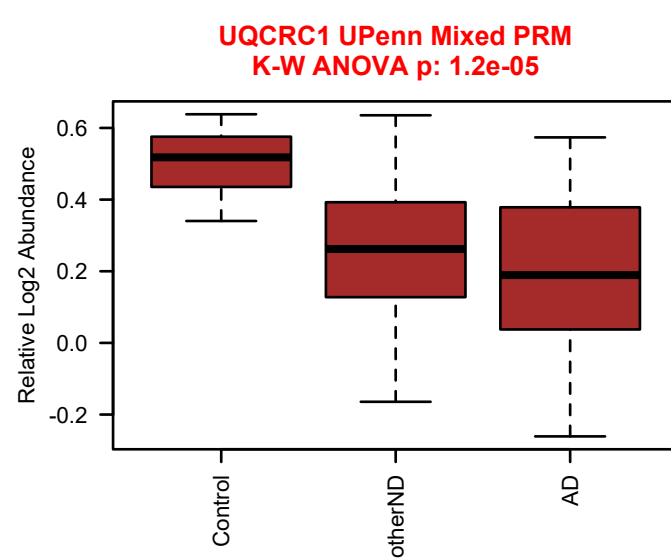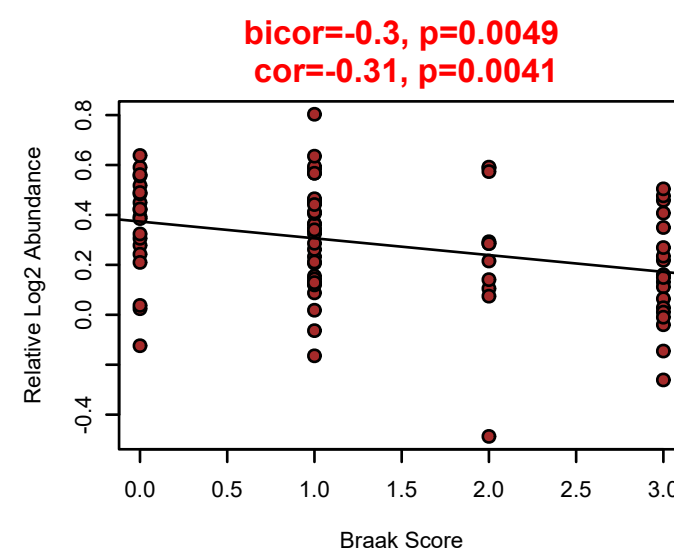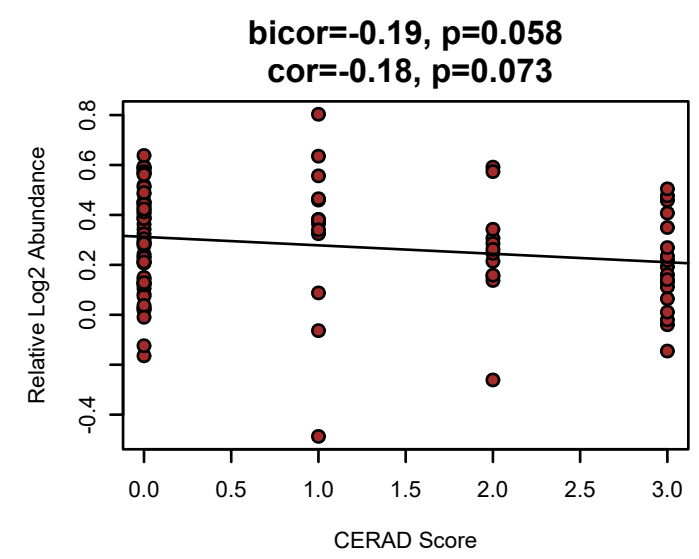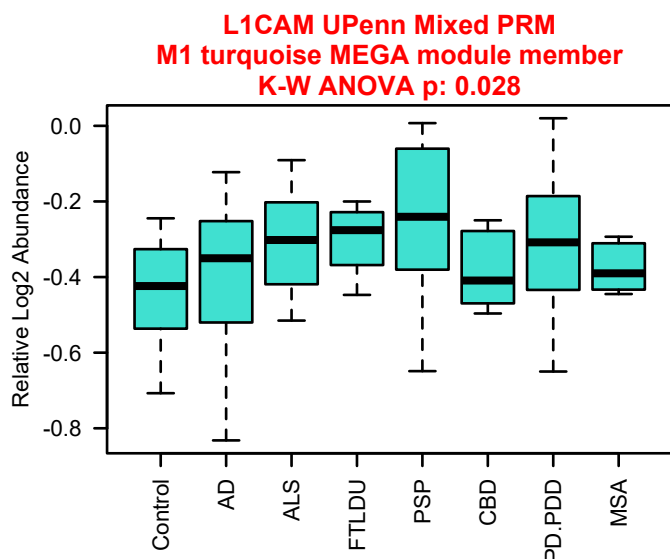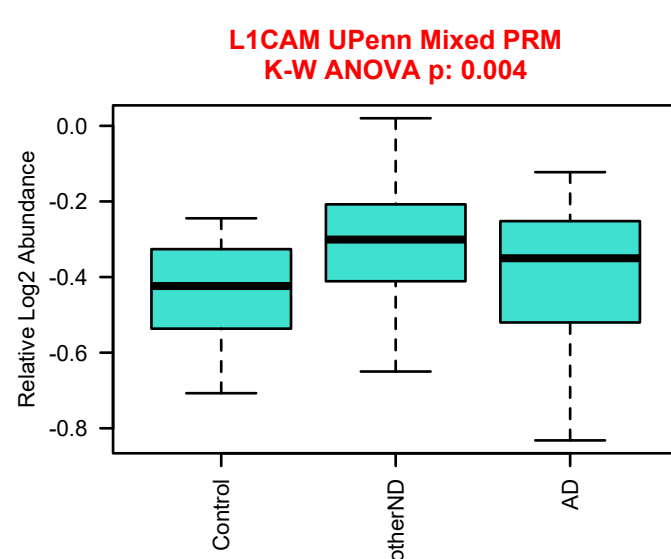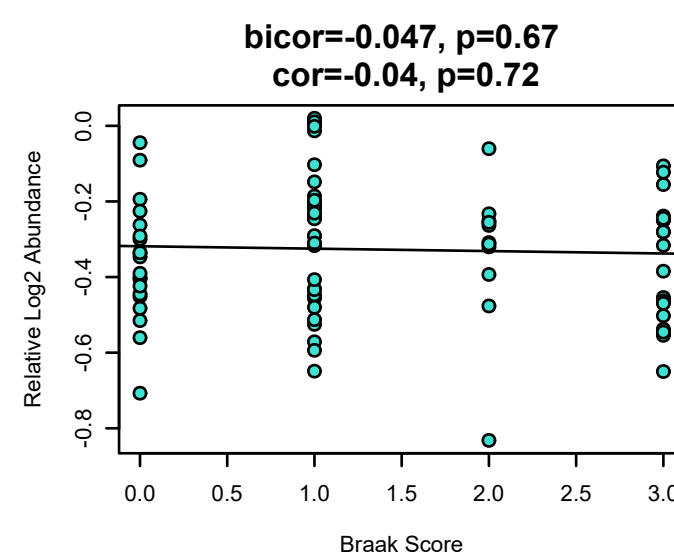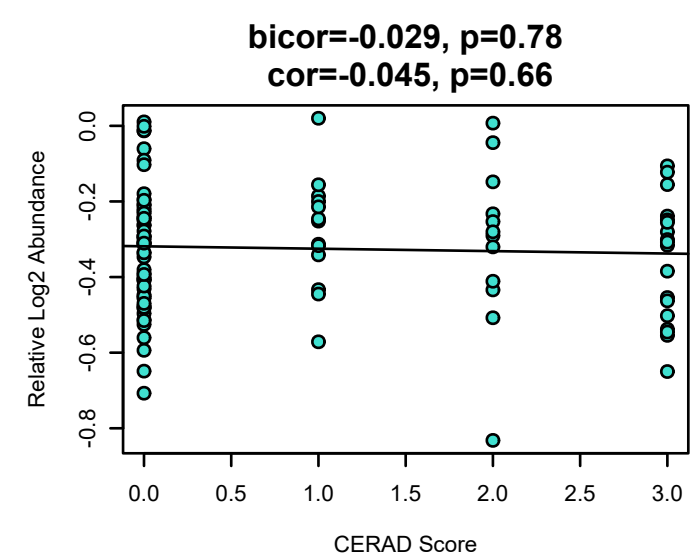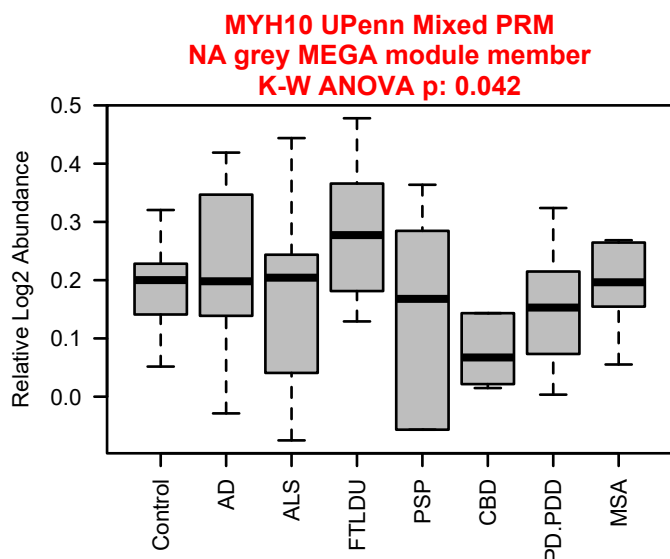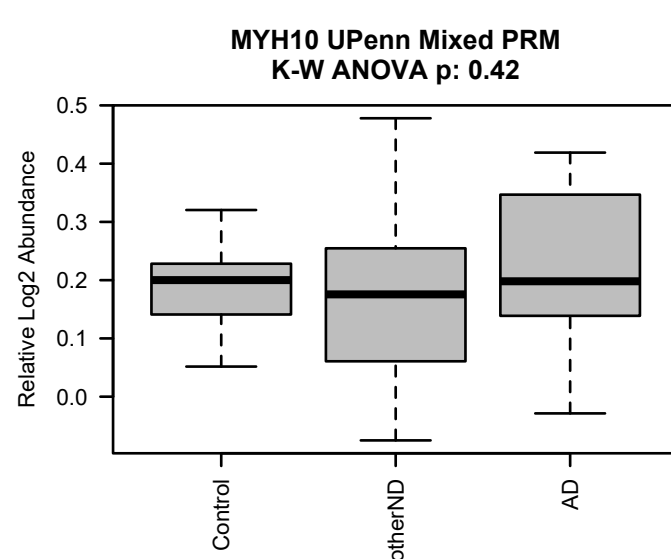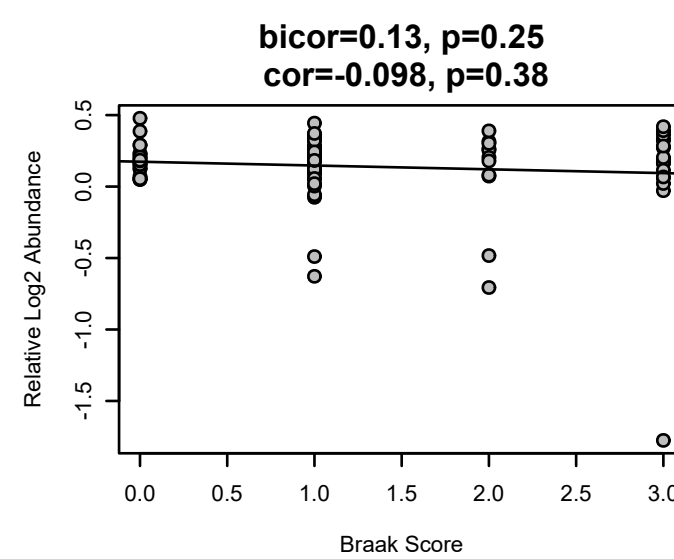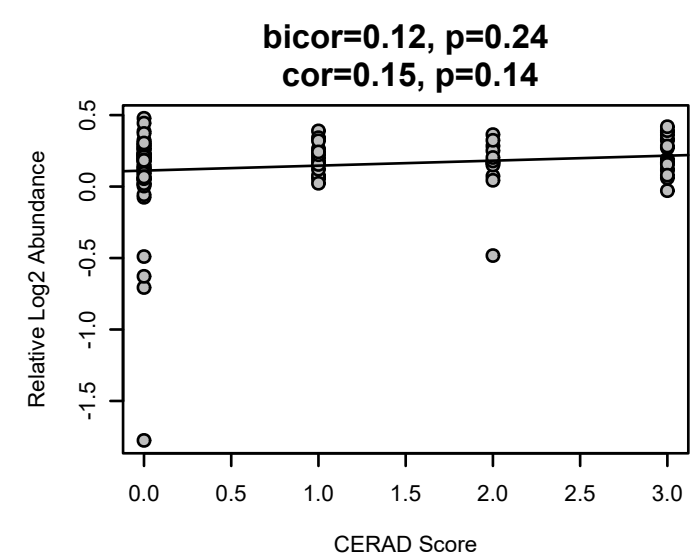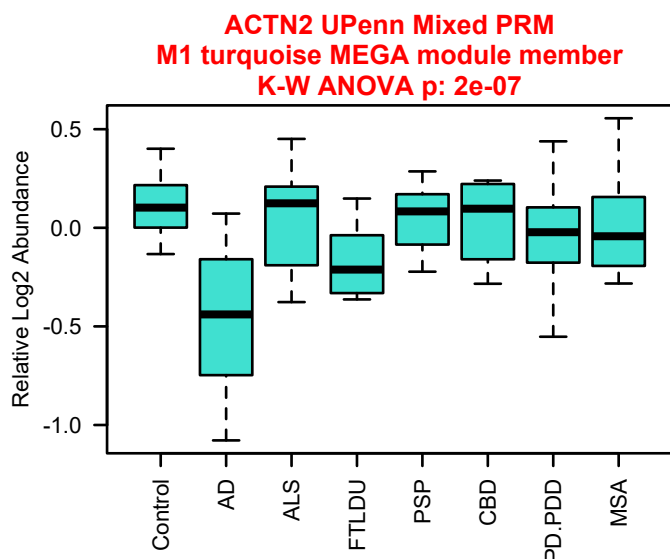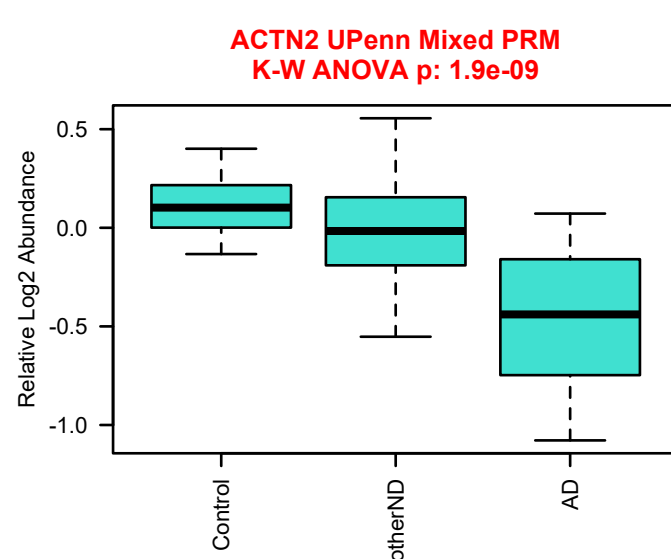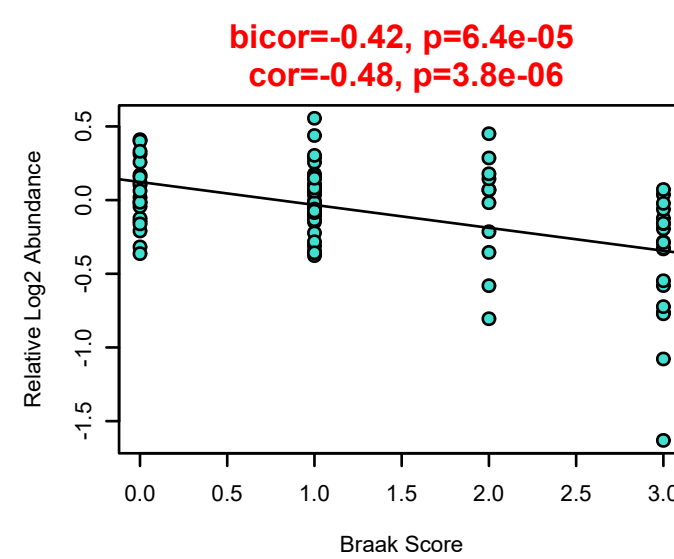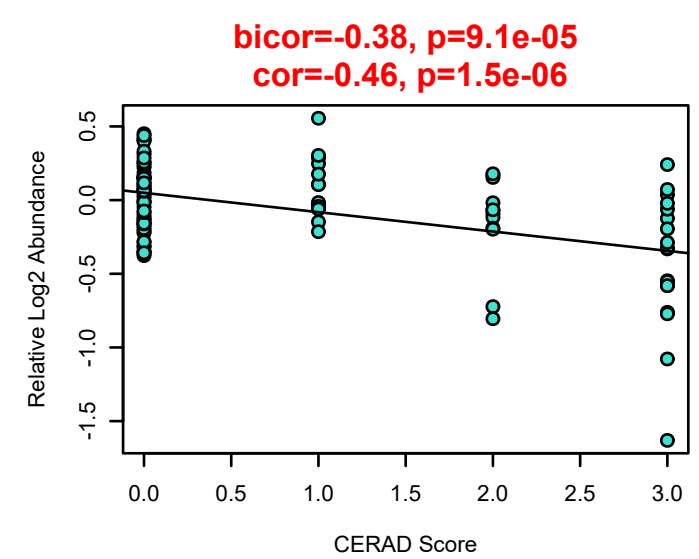



**KRT2 UPenn Mixed PRM**  
NA grey MEGA module member  
K-W ANOVA p: 0.32

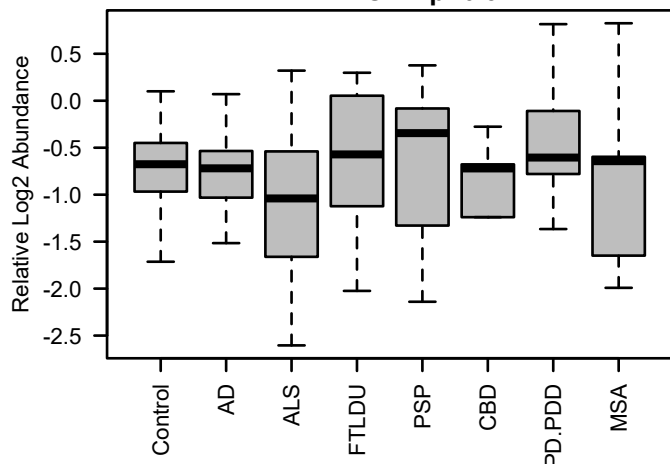

**KRT2 UPenn Mixed PRM**  
K-W ANOVA p: 0.99

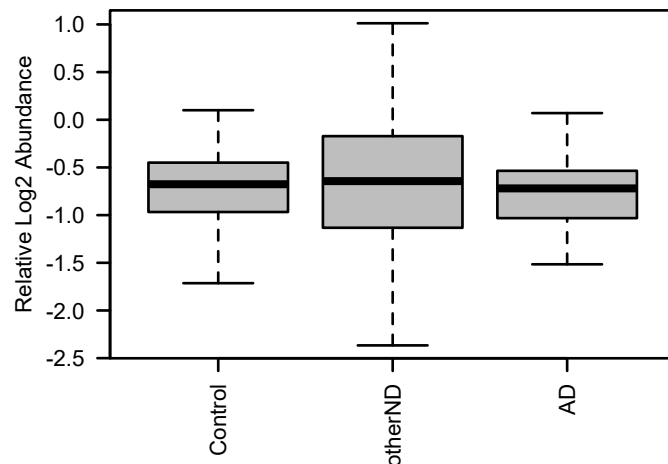

**bicor=0.12, p=0.26**  
**cor=0.17, p=0.12**

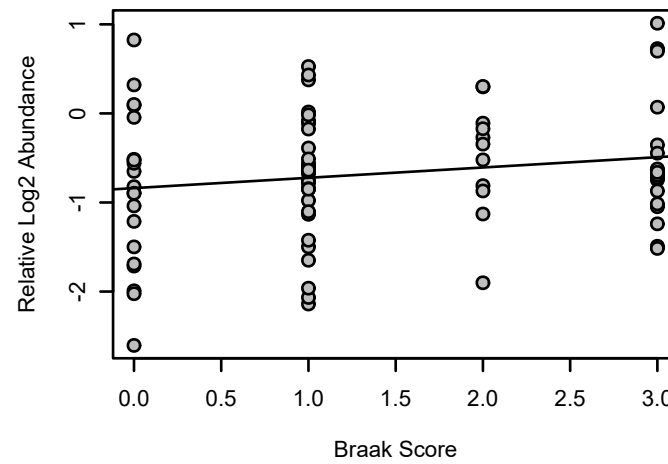

**bicor=0.085, p=0.4**  
**cor=0.12, p=0.23**

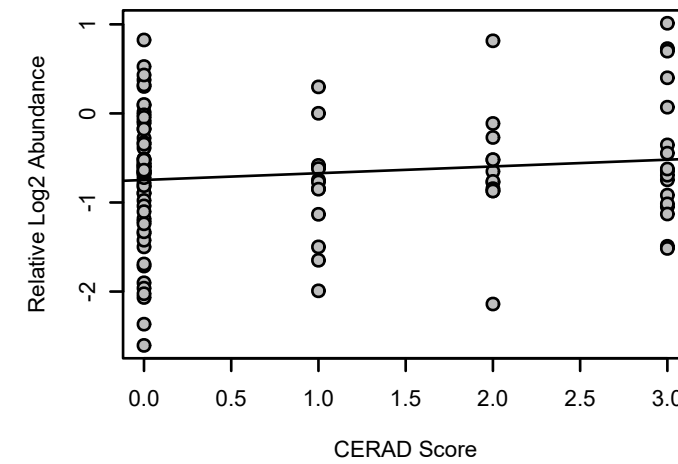

**ATP5C1 UPenn Mixed PRM**  
M3 brown MEGA module member  
K-W ANOVA p: 0.16

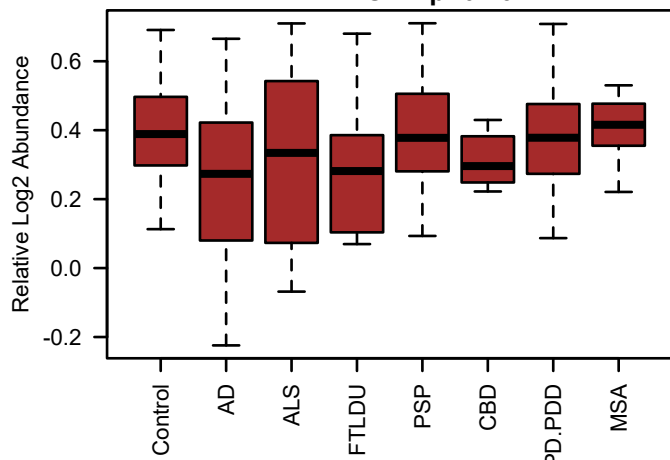

**ATP5C1 UPenn Mixed PRM**  
K-W ANOVA p: 0.2

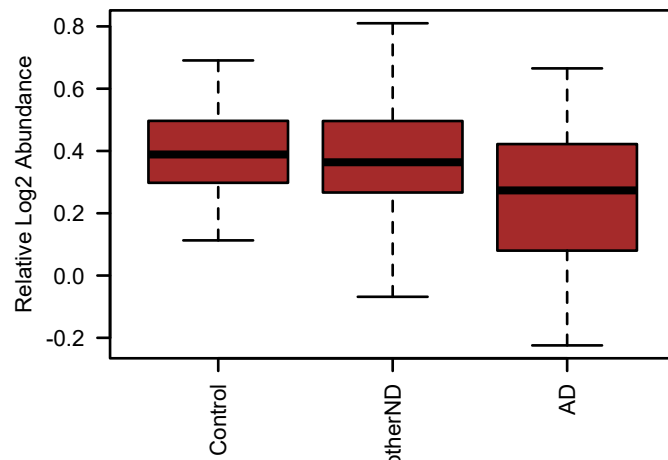

**bicor=-0.12, p=0.26**  
**cor=-0.17, p=0.12**

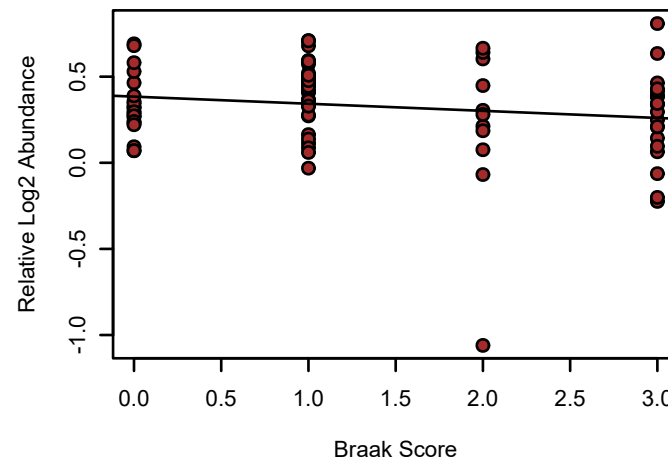

**bicor=-0.13, p=0.18**  
**cor=-0.12, p=0.23**

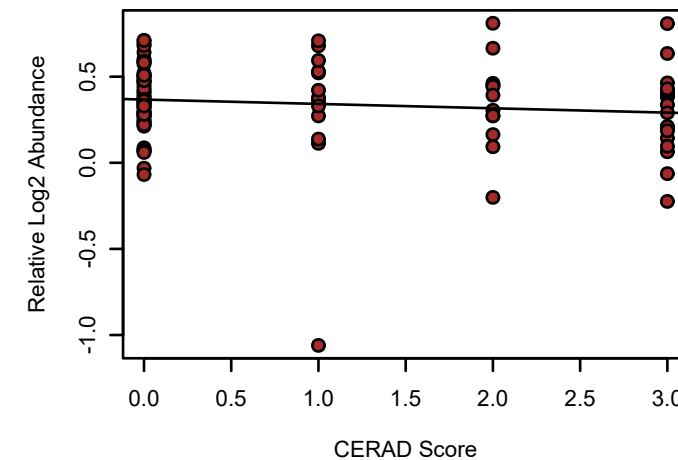

**ATP6V1E2 UPenn Mixed PRM**  
NA grey20 MEGA module member  
K-W ANOVA p: 0.21

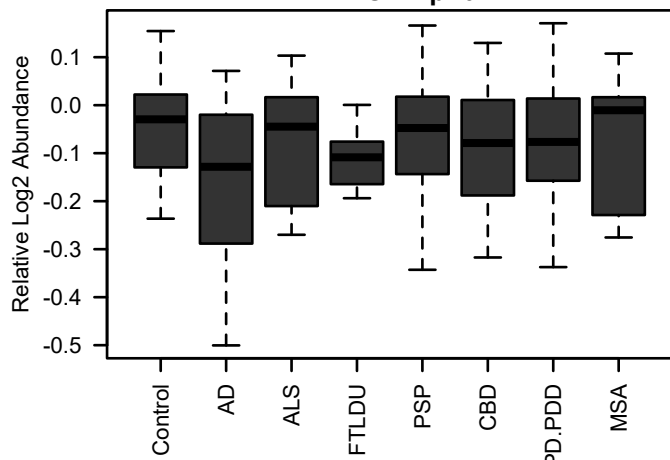

**ATP6V1E2 UPenn Mixed PRM**  
K-W ANOVA p: 0.37

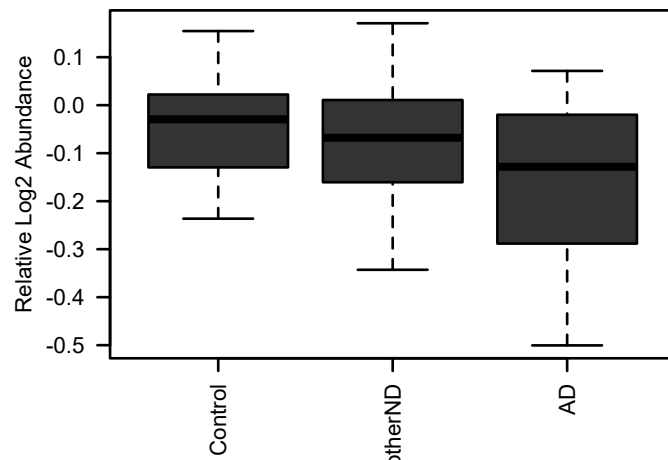

**bicor=-0.18, p=0.096**  
**cor=-0.18, p=0.1**

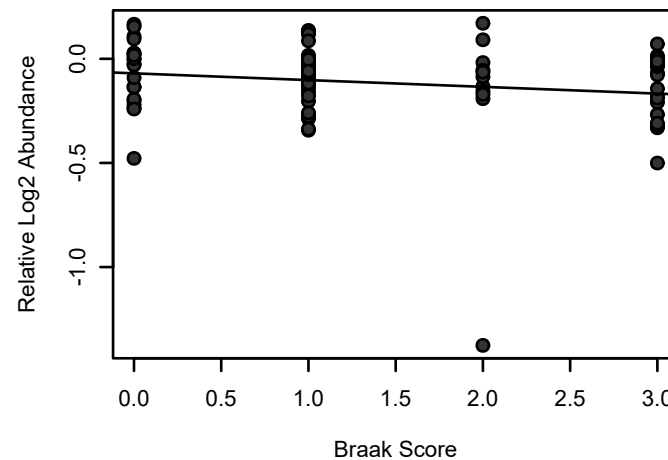

**bicor=-0.1, p=0.31**  
**cor=-0.083, p=0.41**

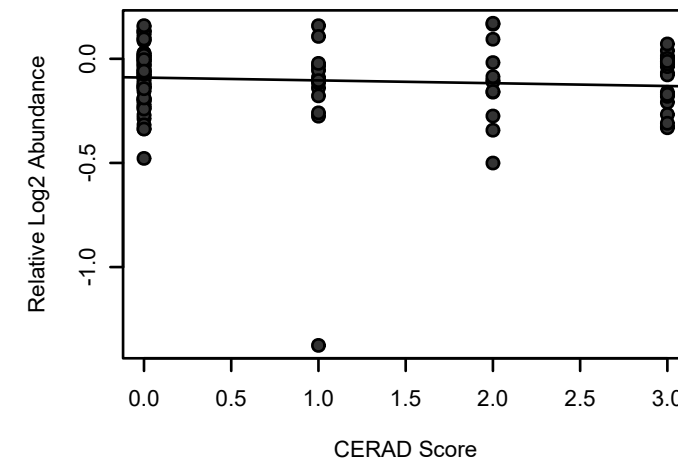

**ATP6V1A UPenn Mixed PRM**  
M1 turquoise MEGA module member  
K-W ANOVA p: 0.15

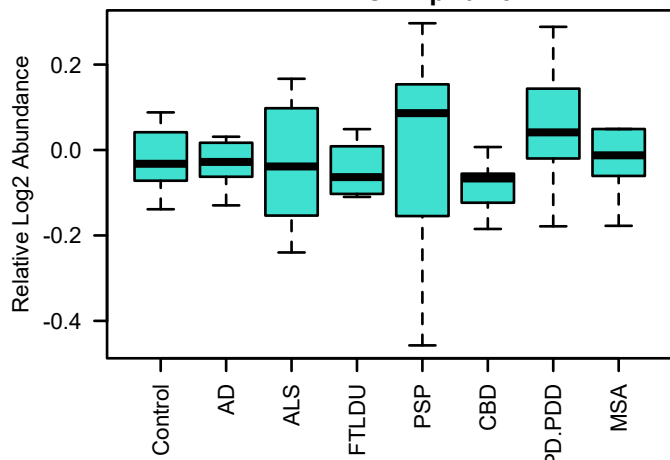

**ATP6V1A UPenn Mixed PRM**  
K-W ANOVA p: 0.31

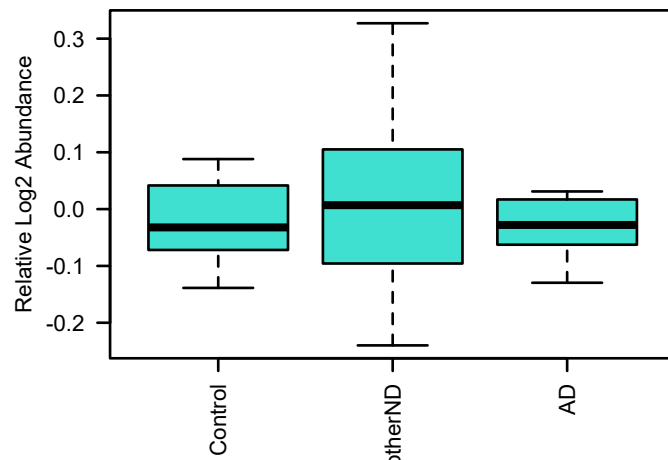

**bicor=0.052, p=0.64**  
**cor=0.0036, p=0.97**

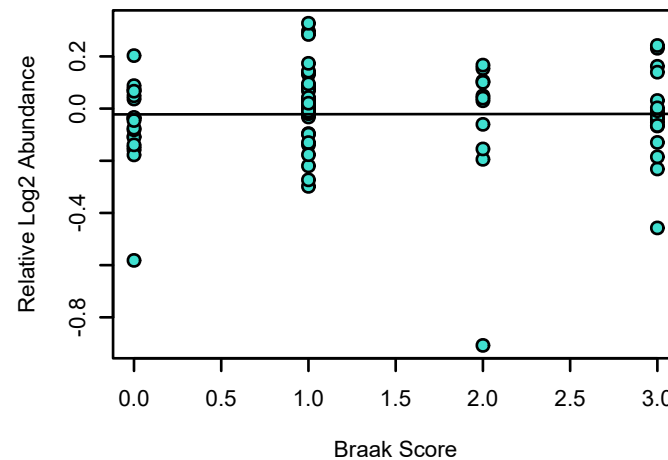

**bicor=0.14, p=0.15**  
**cor=0.097, p=0.34**

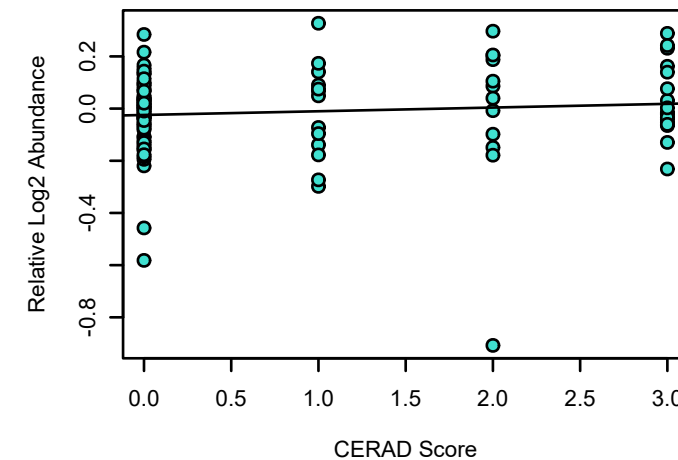

**GRIA2 UPenn Mixed PRM**  
M1 turquoise MEGA module member  
K-W ANOVA p: 7.7e-05

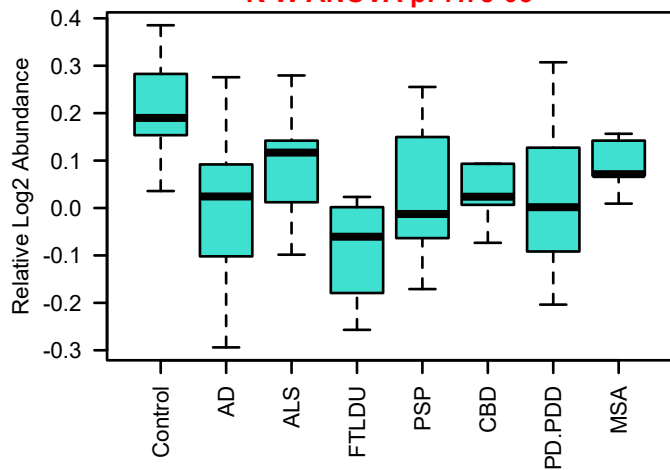

**GRIA2 UPenn Mixed PRM**  
K-W ANOVA p: 3.4e-05

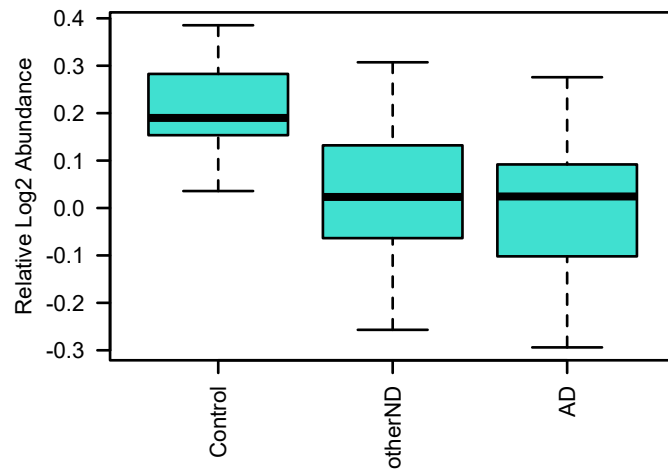

**bicor=-0.3, p=0.005**  
**cor=-0.29, p=0.0075**

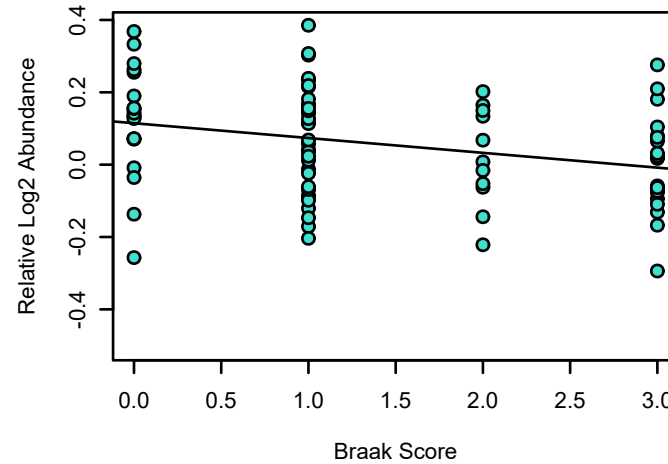

**bicor=-0.12, p=0.25**  
**cor=-0.11, p=0.28**

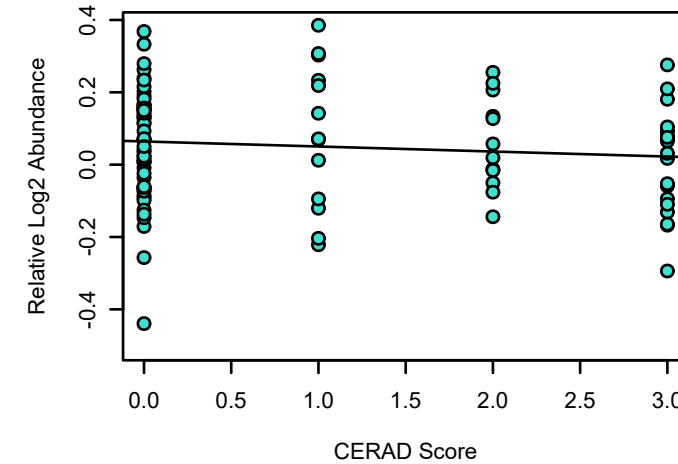

**UQCRFS1 UPenn Mixed PRM**  
M3 brown MEGA module member  
K-W ANOVA p: 0.5

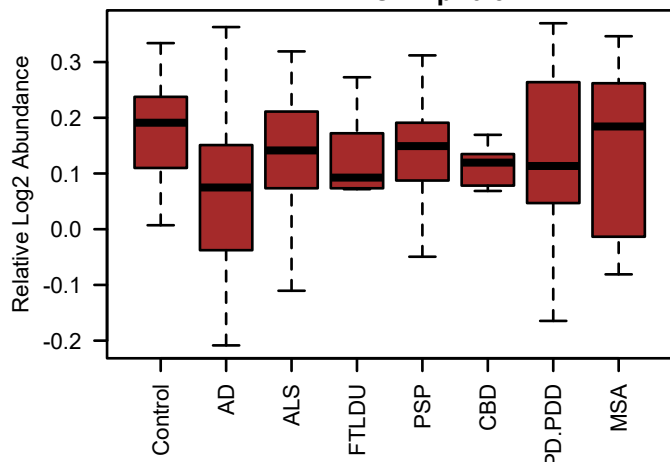

**UQCRFS1 UPenn Mixed PRM**  
K-W ANOVA p: 0.059

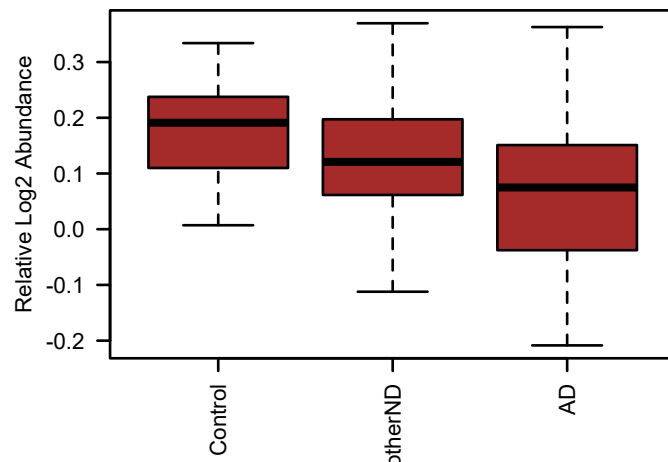

**bicor=-0.19, p=0.085**  
**cor=-0.2, p=0.068**

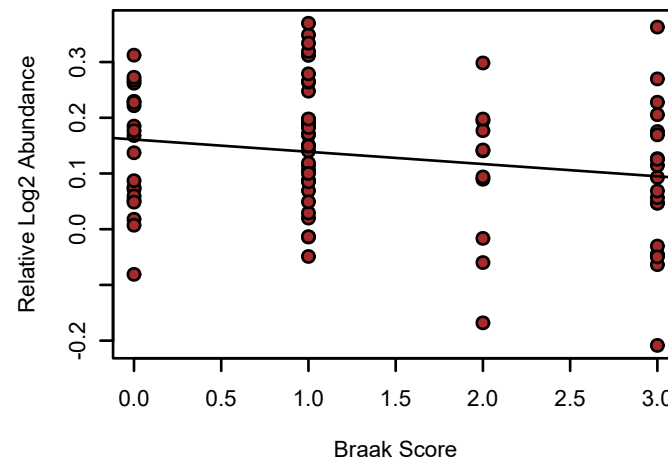

**bicor=-0.18, p=0.075**  
**cor=-0.17, p=0.091**

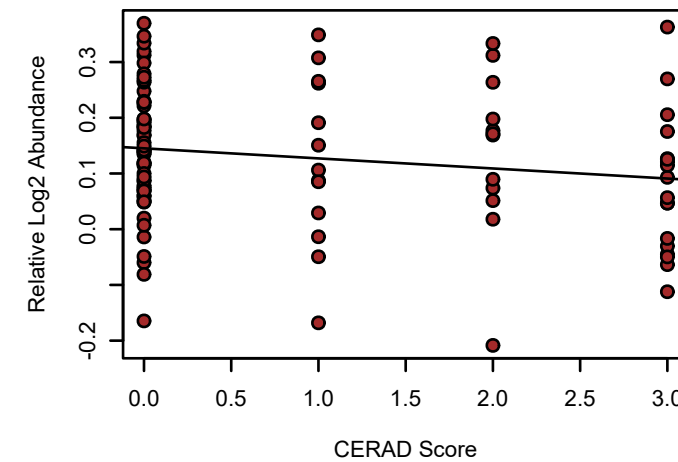

**CCT5 UPenn Mixed PRM**  
M11 greenyellow MEGA module member  
K-W ANOVA p: 0.017

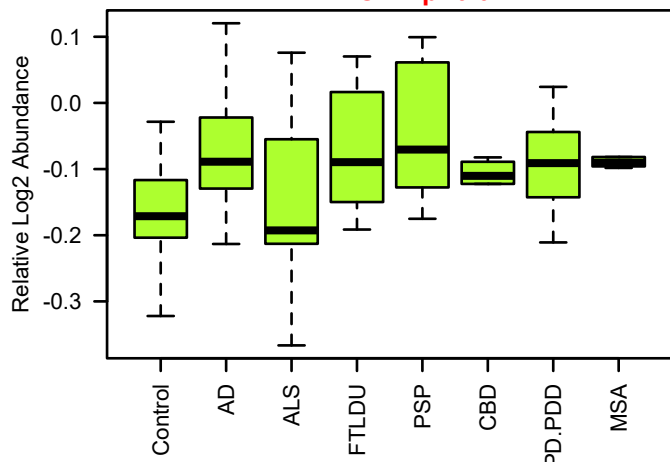

**CCT5 UPenn Mixed PRM**  
K-W ANOVA p: 0.042

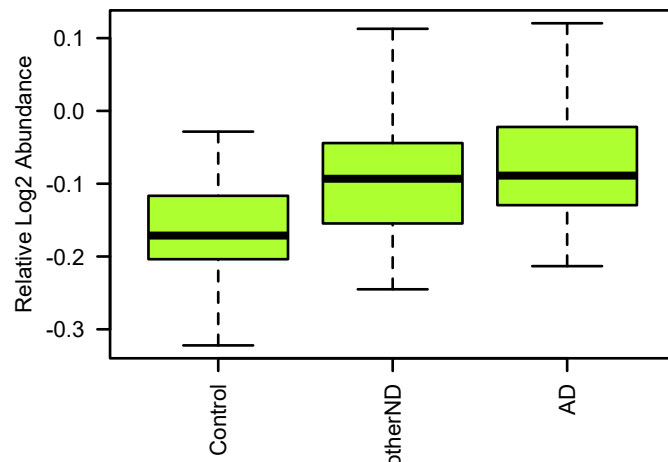

**bicor=0.24, p=0.025**  
**cor=0.27, p=0.013**

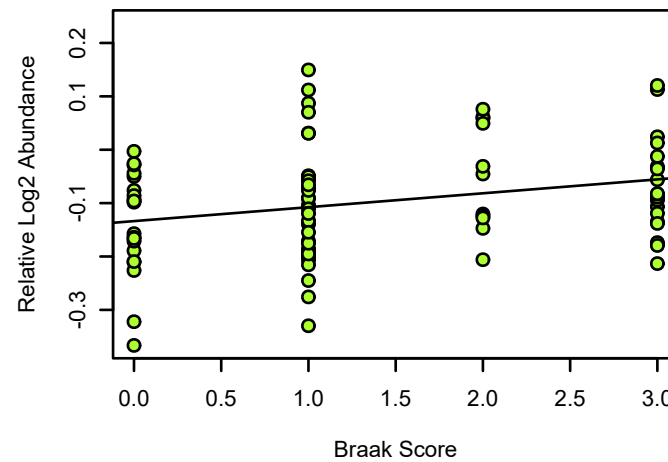

**bicor=0.26, p=0.0084**  
**cor=0.27, p=0.0066**

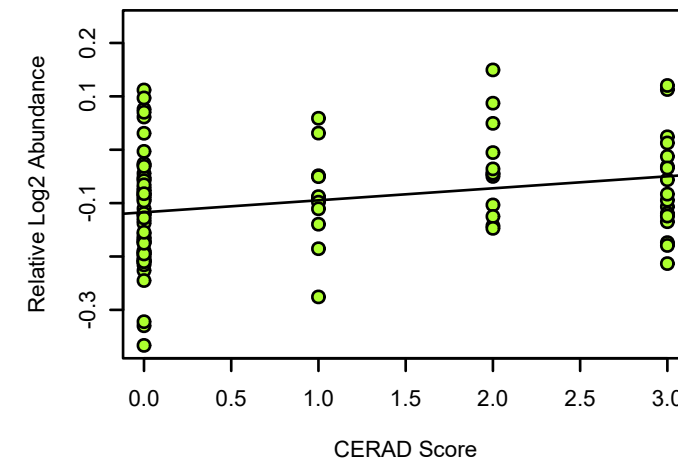

**IDH2 UPenn Mixed PRM**  
M1 turquoise MEGA module member  
K-W ANOVA p: 0.001

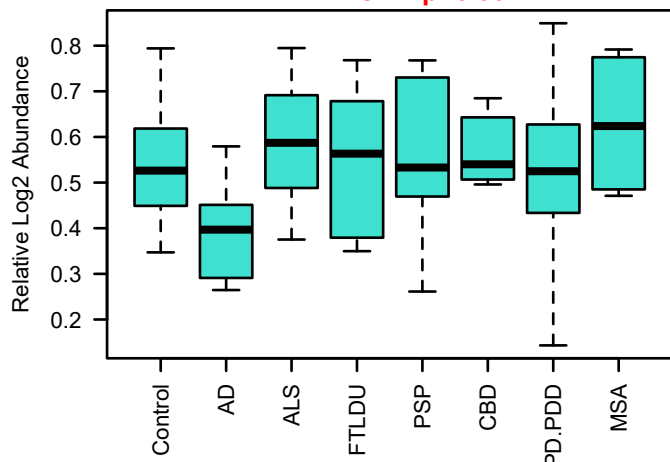

**IDH2 UPenn Mixed PRM**  
K-W ANOVA p: 2.4e-05

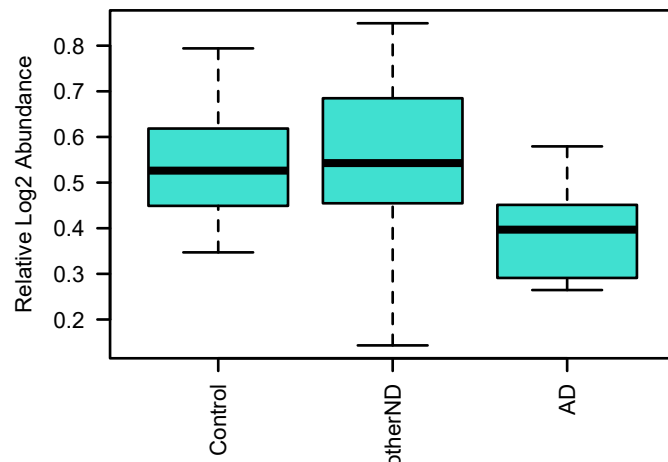

**bicor=-0.22, p=0.049**  
**cor=-0.29, p=0.0075**

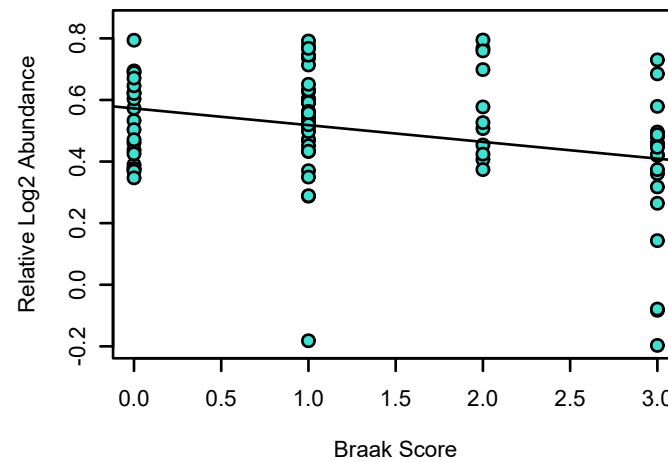

**bicor=-0.33, p=0.00071**  
**cor=-0.38, p=9.6e-05**

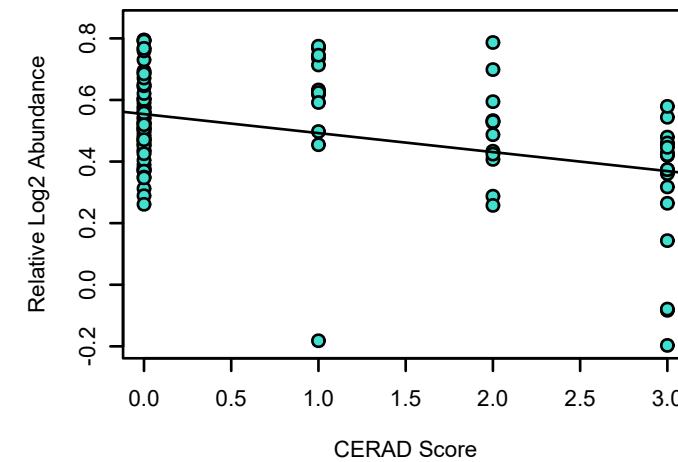

**TUFM UPenn Mixed PRM**  
**M3 brown MEGA module member**  
**K-W ANOVA p: 0.13**

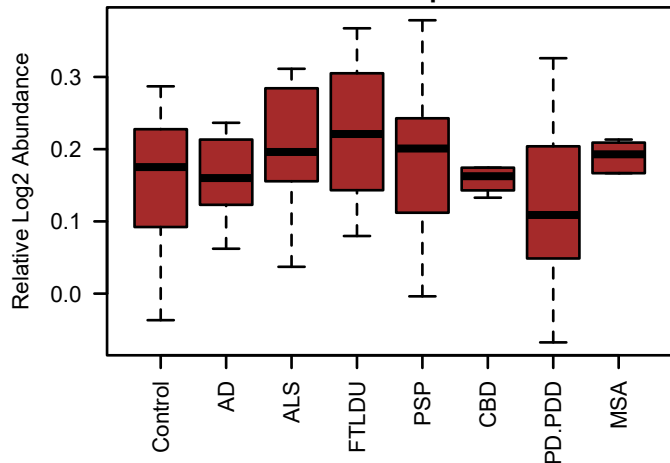

**TUFM UPenn Mixed PRM**  
**K-W ANOVA p: 0.88**

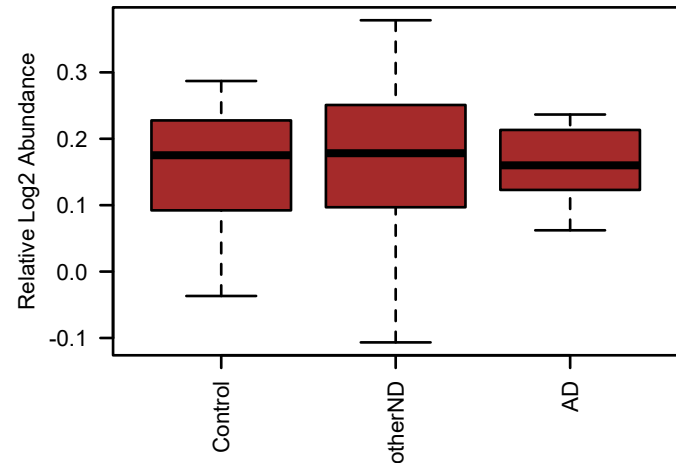

**bicor=-0.16, p=0.15**  
**cor=-0.12, p=0.28**

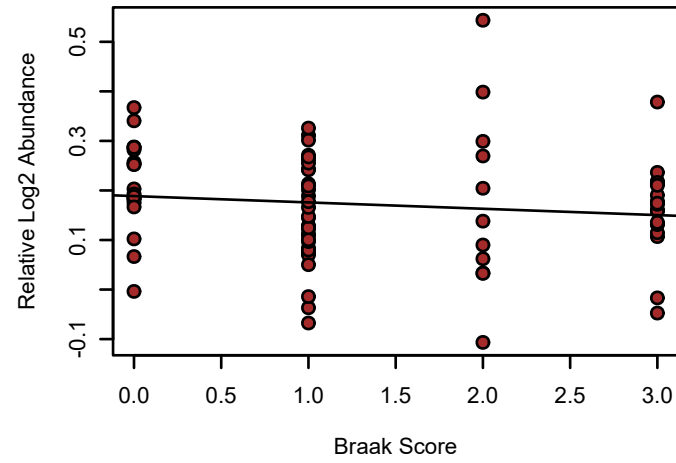

**bicor=-0.21, p=0.036**  
**cor=-0.21, p=0.036**

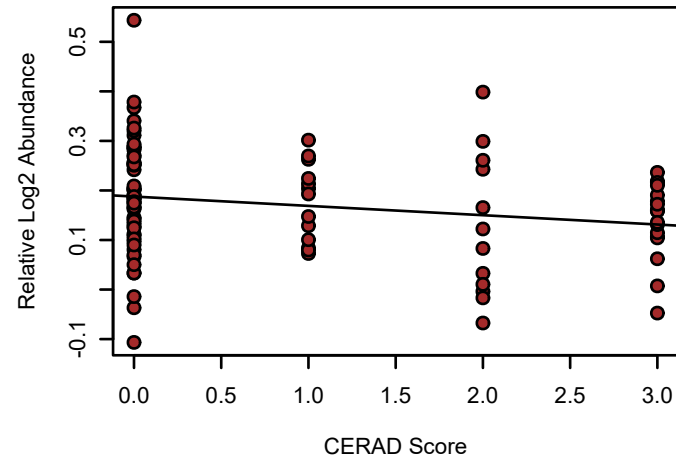

**RGS7 UPenn Mixed PRM**  
**M1 turquoise MEGA module member**  
**K-W ANOVA p: 1.1e-05**

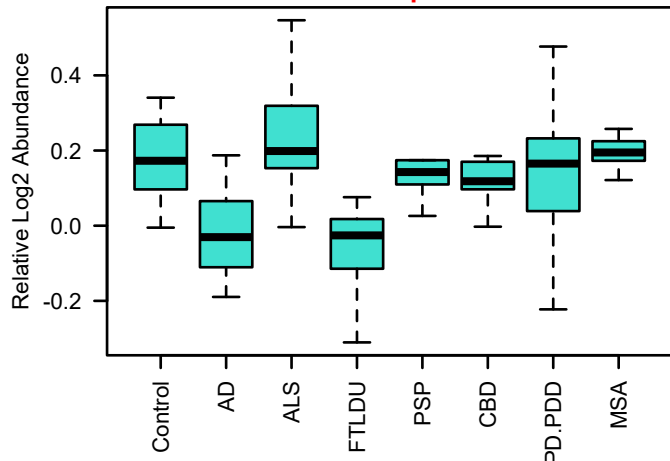

**RGS7 UPenn Mixed PRM**  
**K-W ANOVA p: 0.00012**

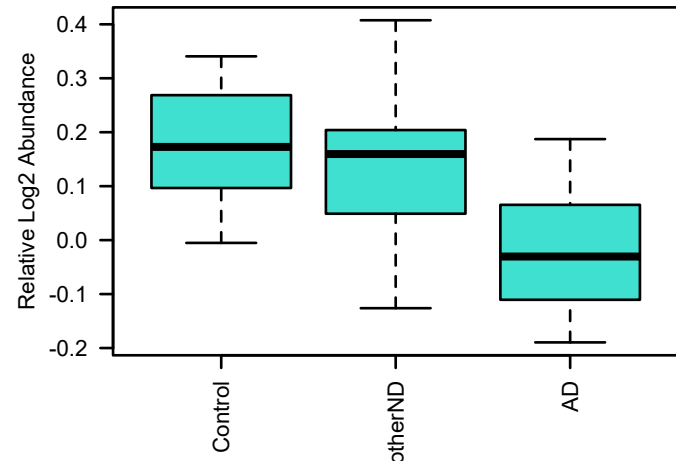

**bicor=-0.3, p=0.0054**  
**cor=-0.3, p=0.0056**

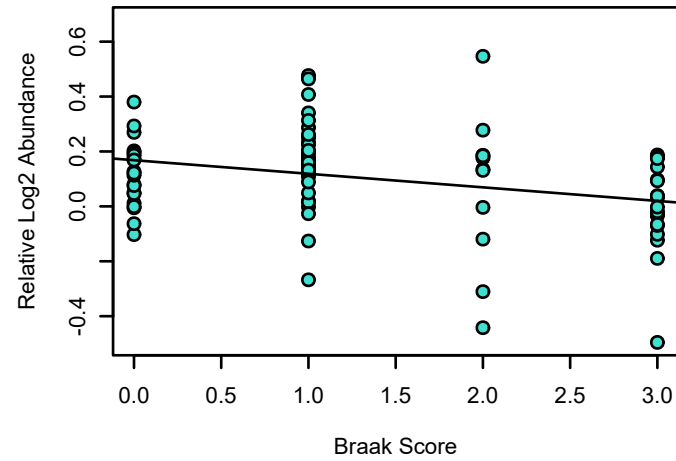

**bicor=-0.35, p=0.00036**  
**cor=-0.35, p=0.00036**

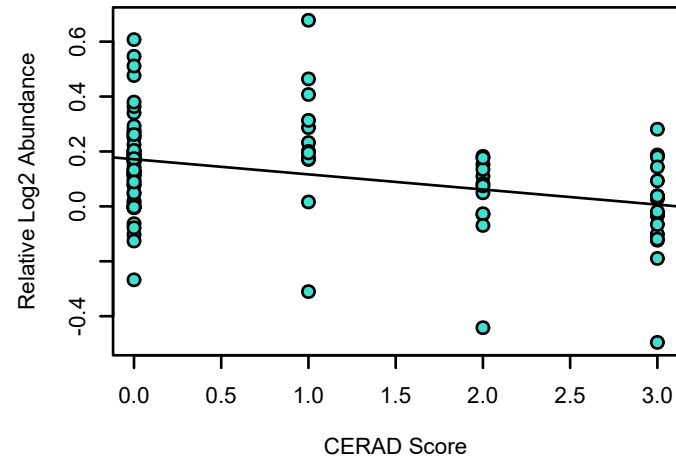

**CCT8 UPenn Mixed PRM**  
**M11 greenyellow MEGA module member**  
**K-W ANOVA p: 6e-04**

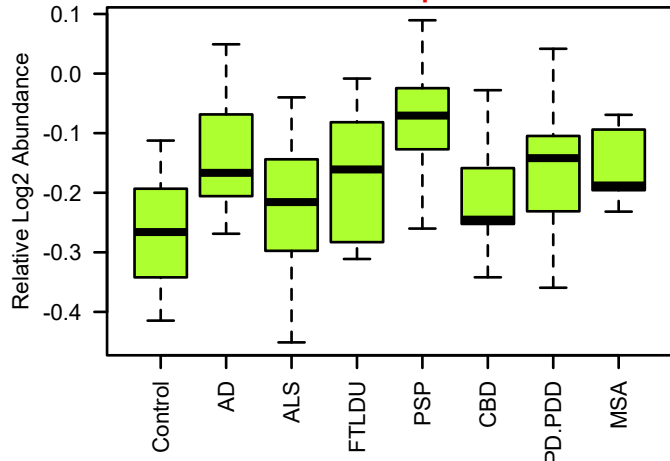

**CCT8 UPenn Mixed PRM**  
**K-W ANOVA p: 0.003**

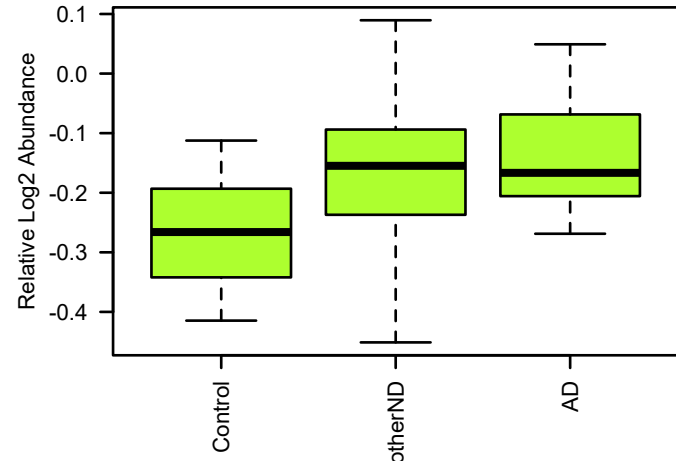

**bicor=0.26, p=0.019**  
**cor=0.23, p=0.035**

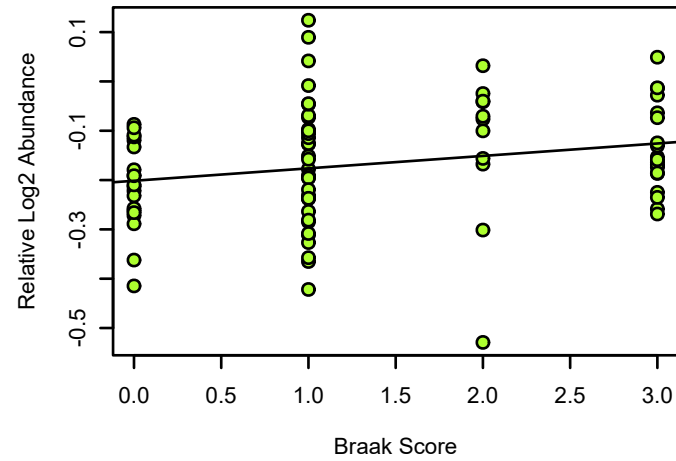

**bicor=0.073, p=0.47**  
**cor=0.062, p=0.54**

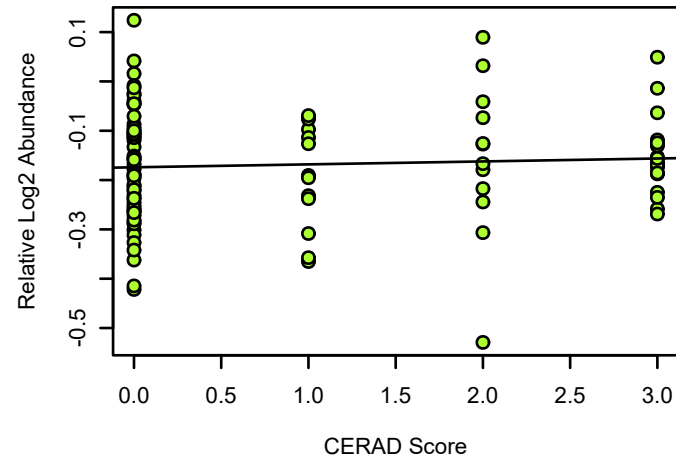

**PLCD1 UPenn Mixed PRM**  
**M4 yellow MEGA module member**  
**K-W ANOVA p: 5.3e-06**

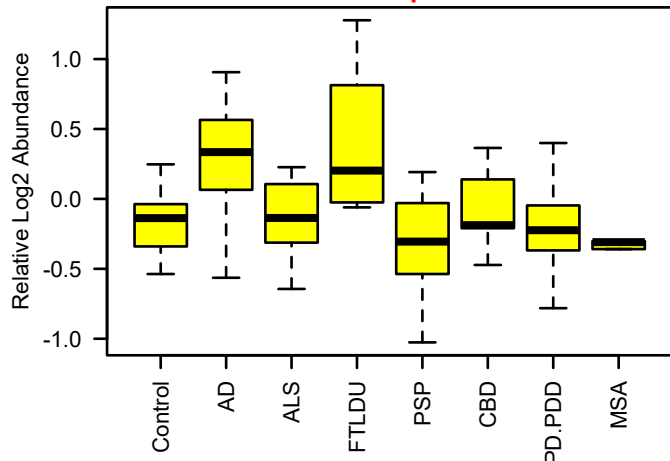

**PLCD1 UPenn Mixed PRM**  
**K-W ANOVA p: 0.00045**

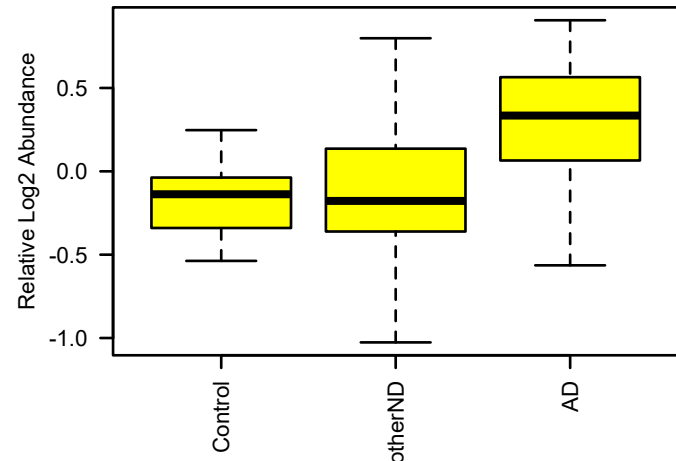

**bicor=0.31, p=0.0046**  
**cor=0.31, p=0.0041**

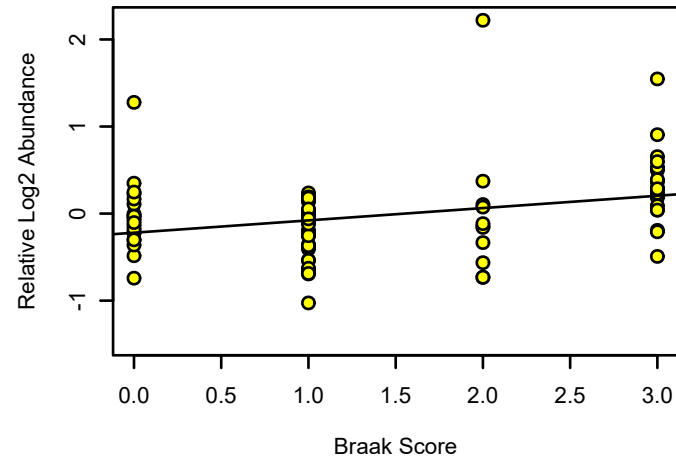

**bicor=0.39, p=6.3e-05**  
**cor=0.34, p=0.00054**

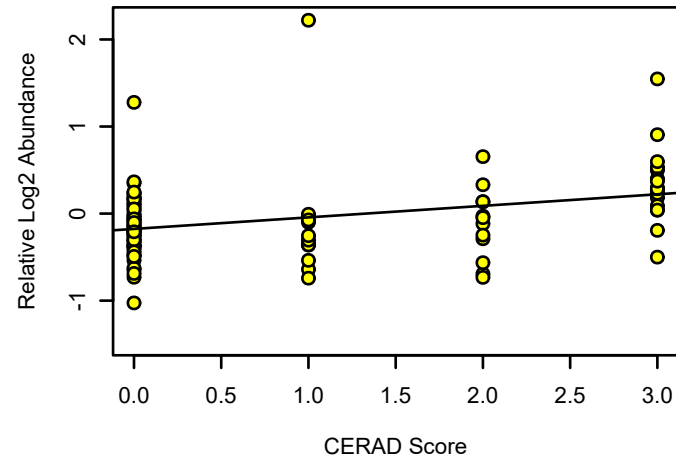



**NDUFA8 UPenn Mixed PRM**  
**M3 brown MEGA module member**  
**K-W ANOVA p: 0.011**

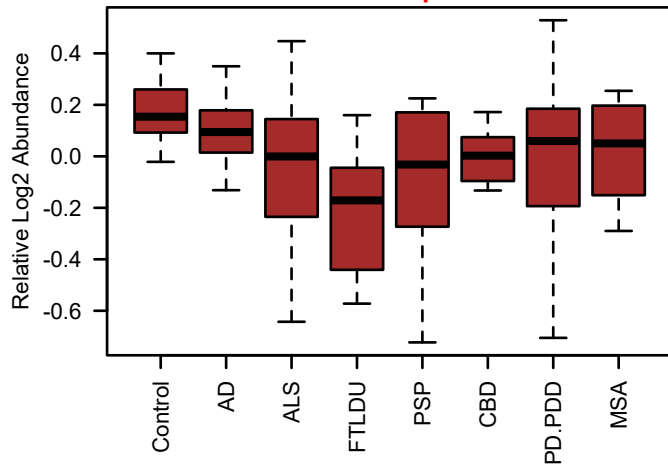

**NDUFA8 UPenn Mixed PRM**  
**K-W ANOVA p: 0.0019**

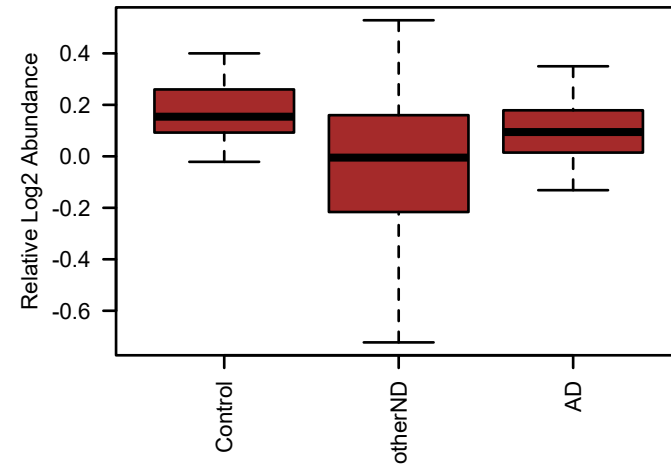

**bicor=-0.076, p=0.49**  
**cor=-0.016, p=0.89**

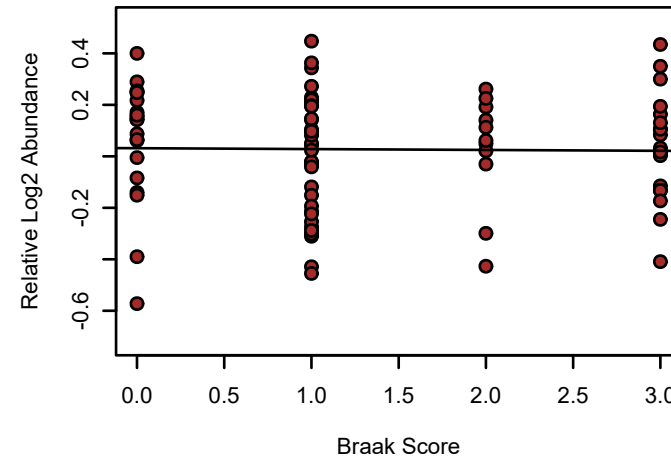

**bicor=0.1, p=0.32**  
**cor=0.12, p=0.23**

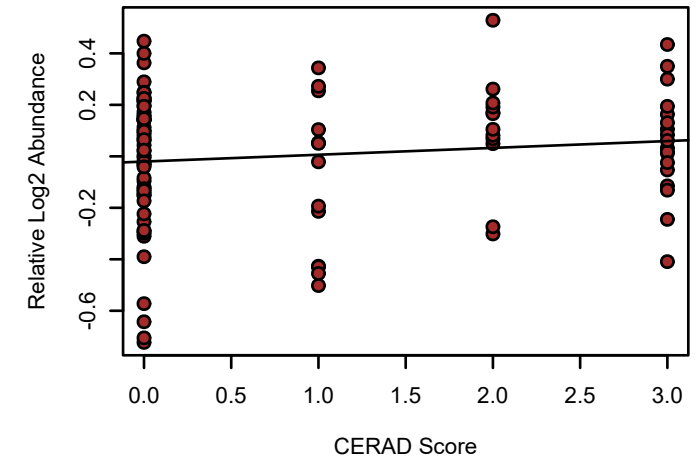

**HNRNPA3 UPenn Mixed PRM**  
**M10 purple MEGA module member**  
**K-W ANOVA p: 0.0052**

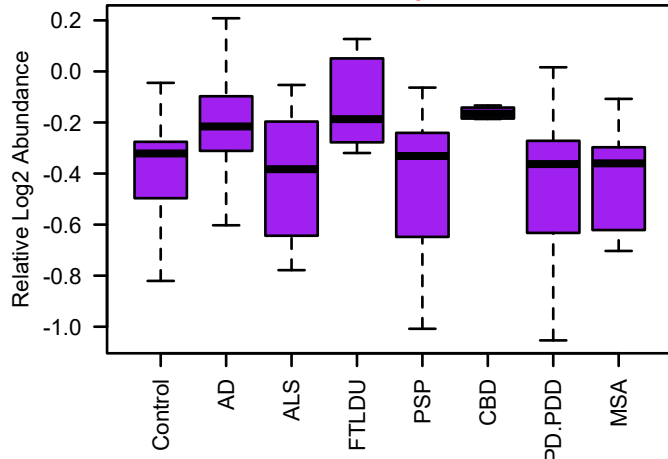

**HNRNPA3 UPenn Mixed PRM**  
**K-W ANOVA p: 0.031**

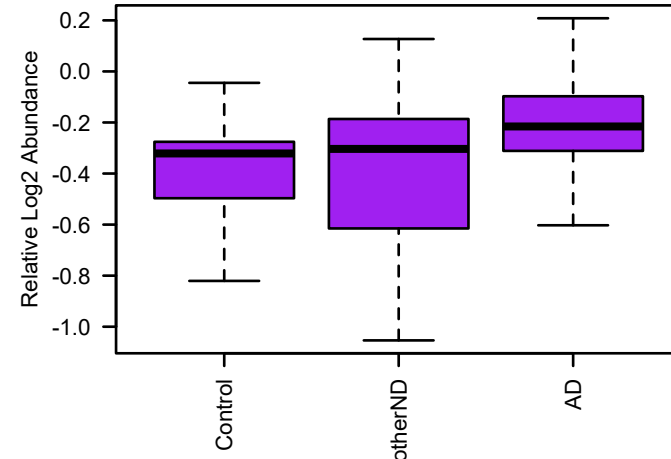

**bicor=0.16, p=0.14**  
**cor=0.22, p=0.044**

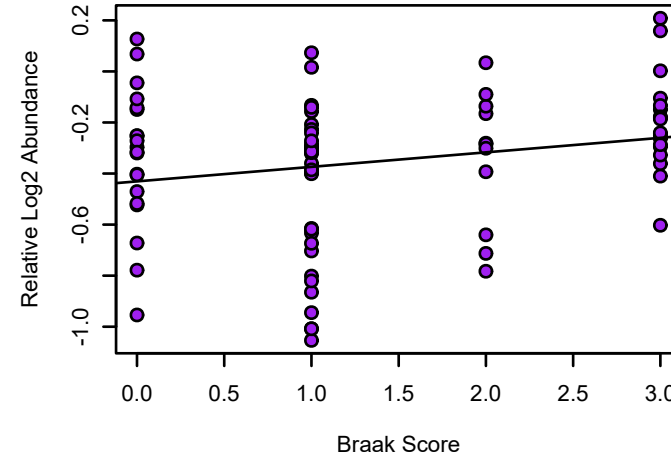

**bicor=0.17, p=0.085**  
**cor=0.19, p=0.058**

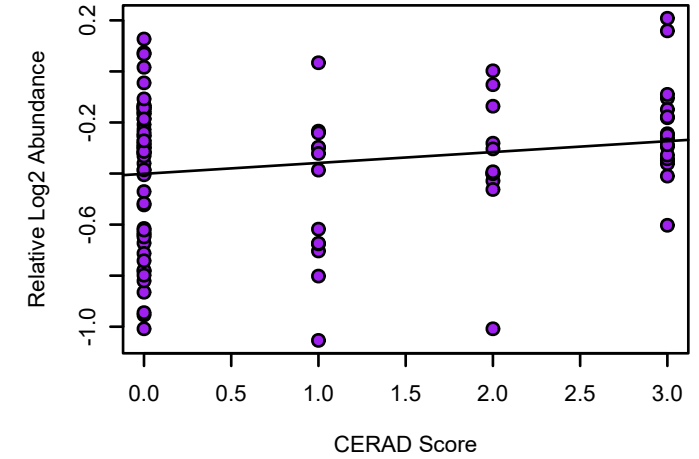

**CACNA2D1 UPenn Mixed PRM**  
**M1 turquoise MEGA module member**  
**K-W ANOVA p: 0.11**

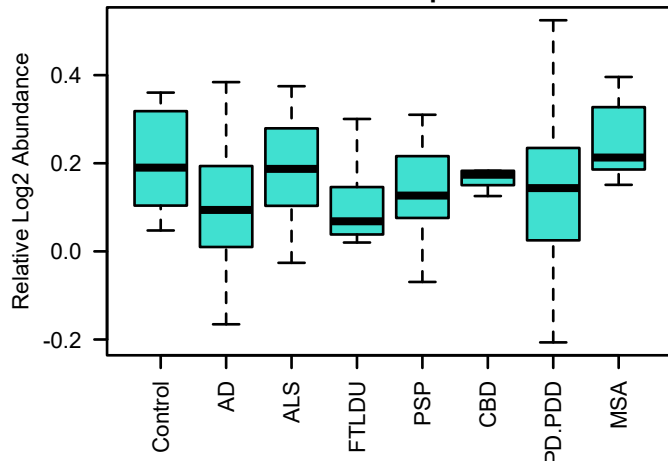

**CACNA2D1 UPenn Mixed PRM**  
**K-W ANOVA p: 0.061**

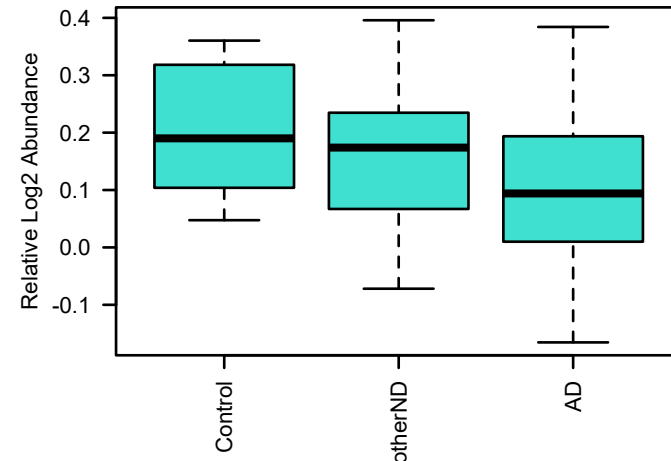

**bicor=-0.079, p=0.47**  
**cor=-0.13, p=0.24**

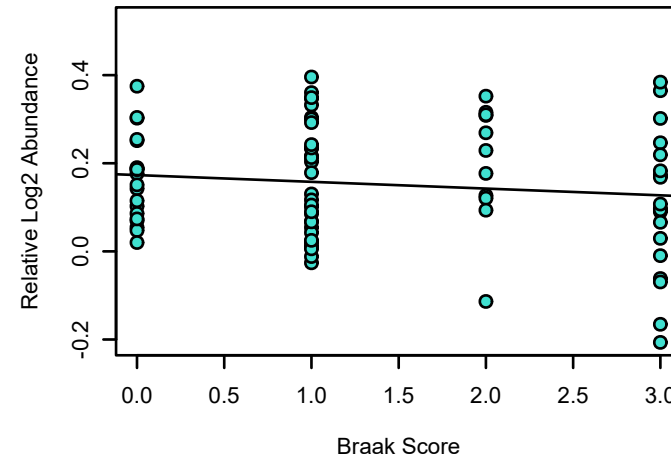

**bicor=-0.11, p=0.29**  
**cor=-0.13, p=0.2**

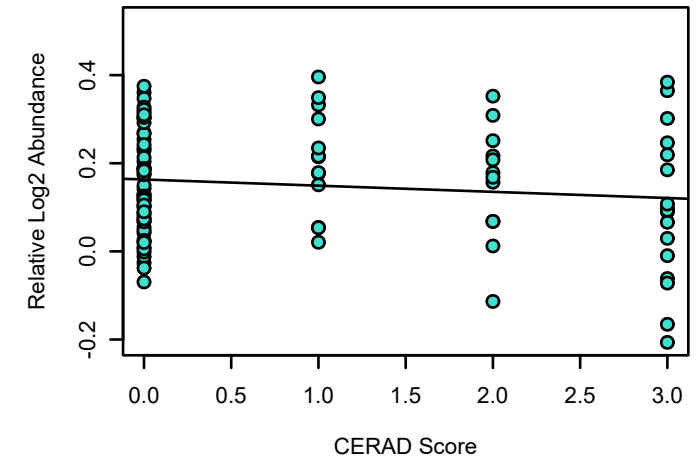

**YARS UPenn Mixed PRM**  
**NA grey MEGA module member**  
**K-W ANOVA p: 0.067**

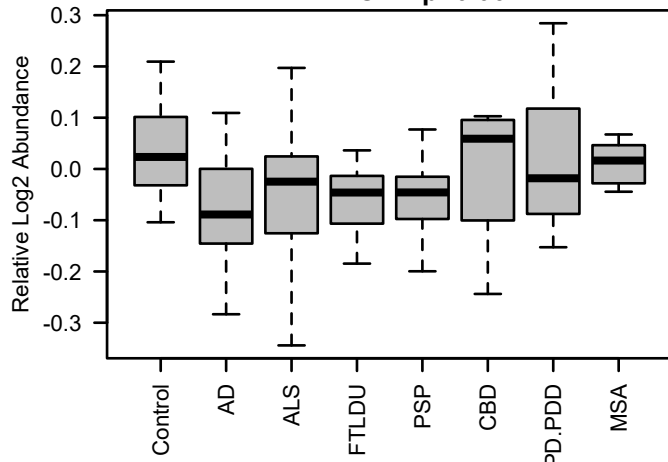

**YARS UPenn Mixed PRM**  
**K-W ANOVA p: 0.047**

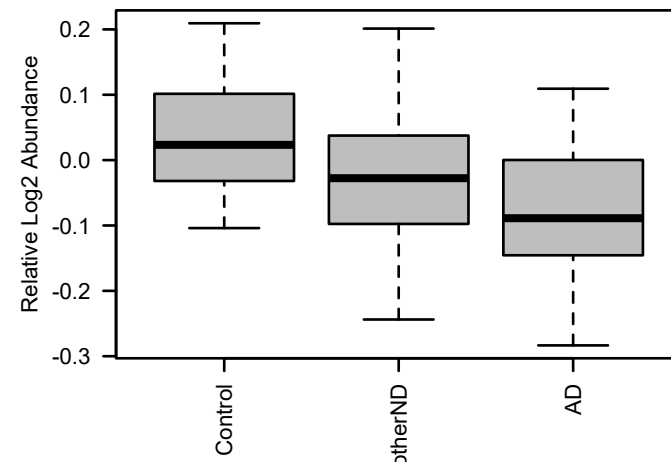

**bicor=-0.14, p=0.21**  
**cor=-0.13, p=0.24**

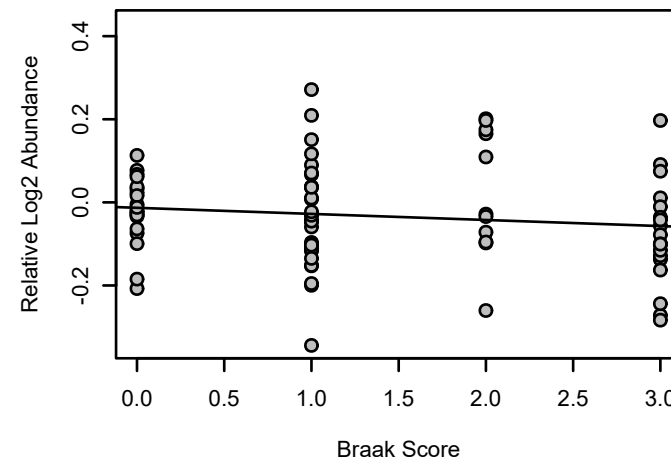

**bicor=-0.074, p=0.47**  
**cor=-0.076, p=0.45**

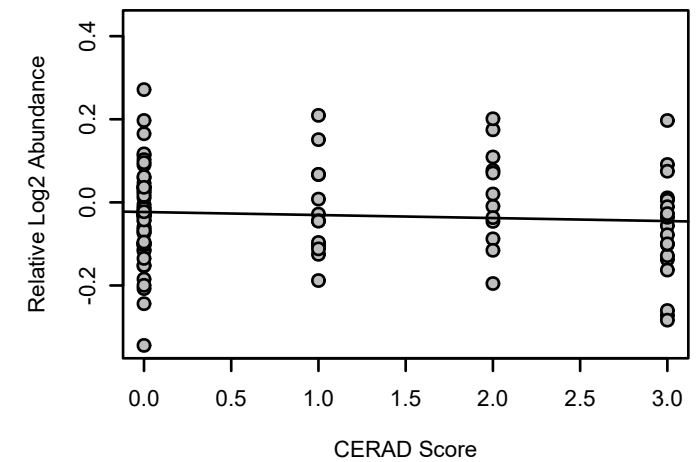

**NAPA Mixed PRM**  
**M12 tan MEGA module member**  
**K-W ANOVA p: 7.2e-06**

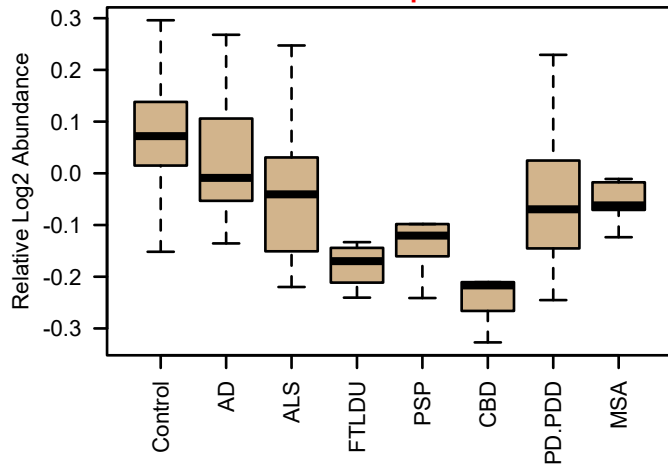

**NAPA UPenn Mixed PRM**  
**K-W ANOVA p: 7e-06**

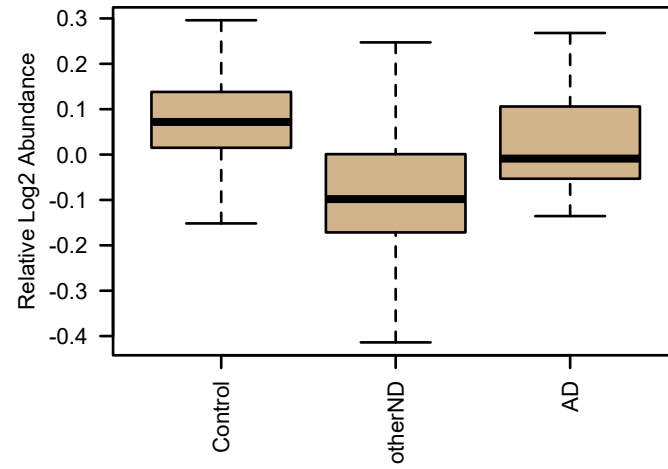

**bicor=-0.01, p=0.93**  
**cor=-0.023, p=0.84**

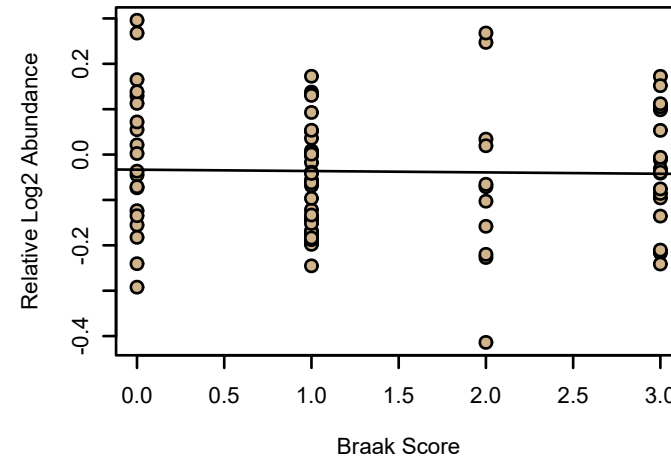

**bicor=0.15, p=0.13**  
**cor=0.14, p=0.16**

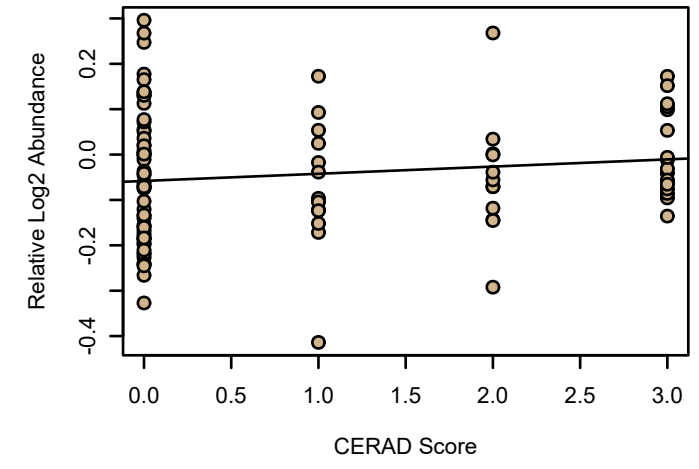

**VCP UPenn Mixed PRM**  
**M4 yellow MEGA module member**  
**K-W ANOVA p: 0.00057**

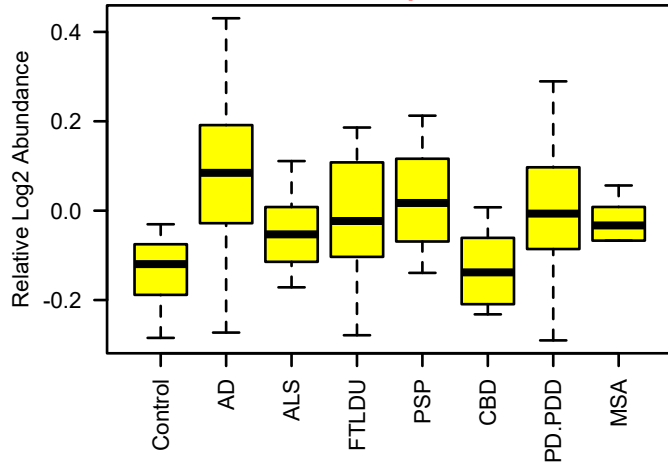

**VCP UPenn Mixed PRM**  
**K-W ANOVA p: 5.9e-05**

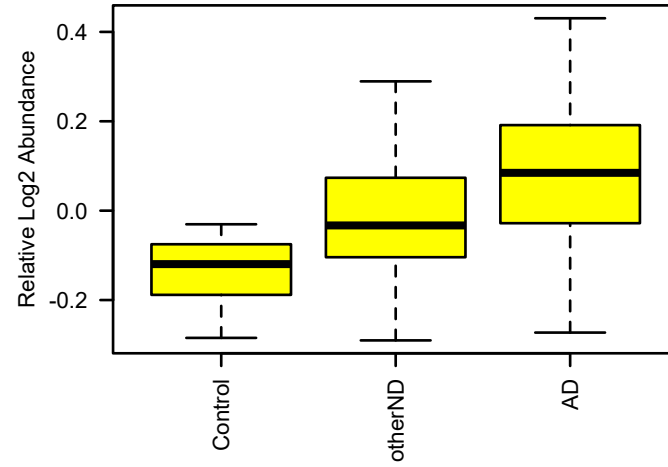

**bicor=0.37, p=0.00051**  
**cor=0.38, p=0.00036**

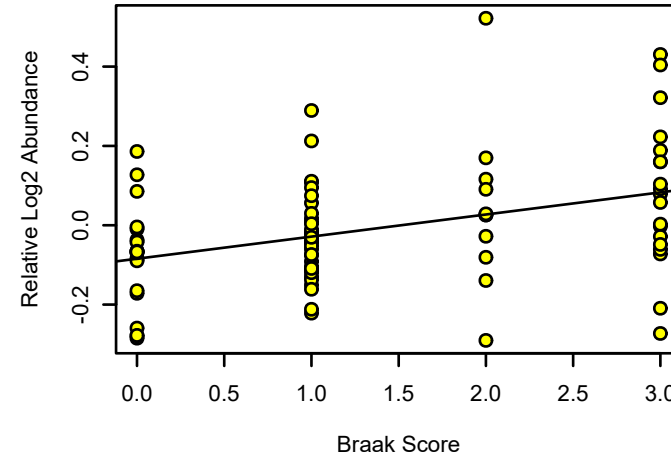

**bicor=0.34, p=0.00062**  
**cor=0.33, p=8e-04**

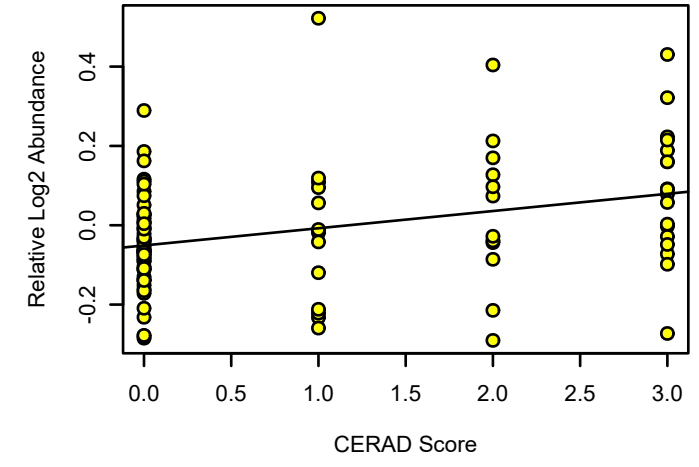

**HNRNPH2 UPenn Mixed PRM**  
**M10 purple MEGA module member**  
**K-W ANOVA p: 0.69**

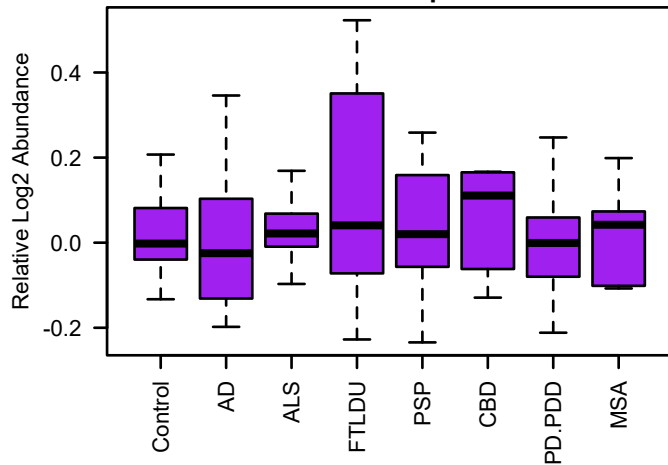

**HNRNPH2 UPenn Mixed PRM**  
**K-W ANOVA p: 0.82**

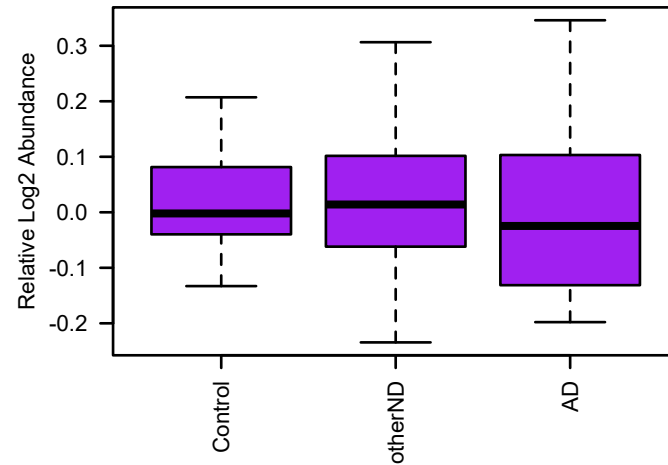

**bicor=-0.045, p=0.69**  
**cor=-0.063, p=0.57**

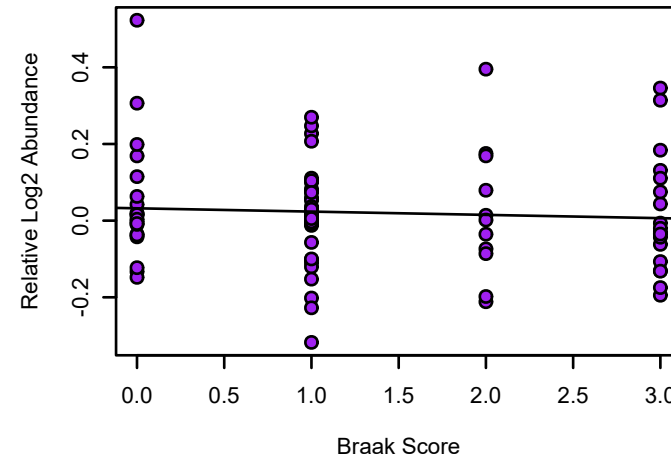

**bicor=-0.017, p=0.87**  
**cor=-0.0094, p=0.93**

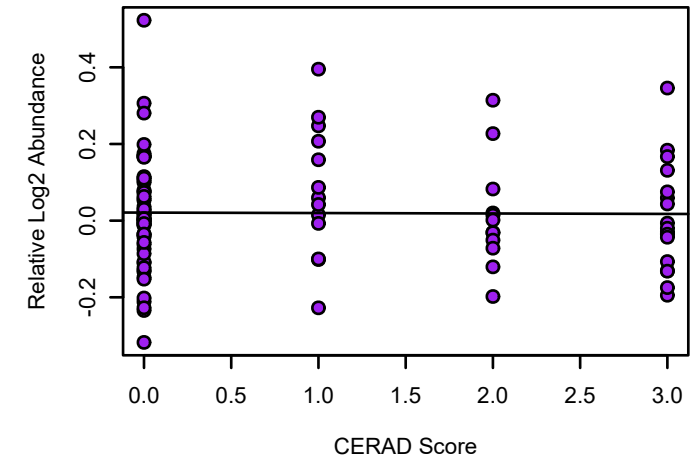

**RPS3A UPenn Mixed PRM**  
**M7 black MEGA module member**  
**K-W ANOVA p: 0.015**

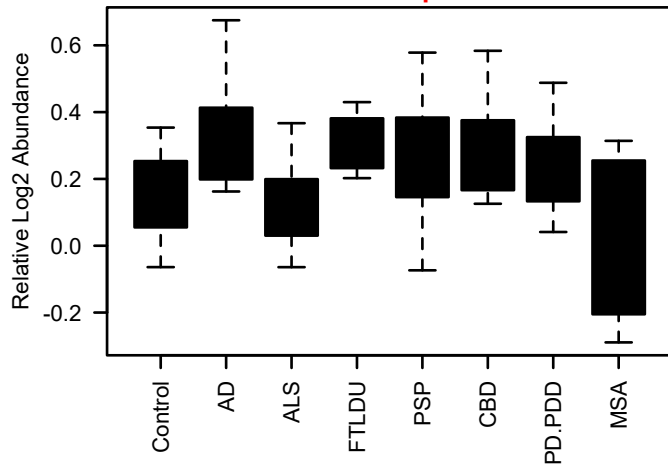

**RPS3A UPenn Mixed PRM**  
**K-W ANOVA p: 0.023**

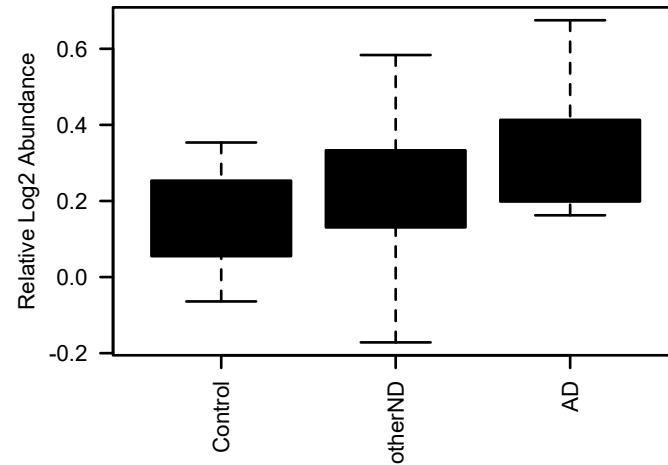

**bicor=0.23, p=0.037**  
**cor=0.24, p=0.028**

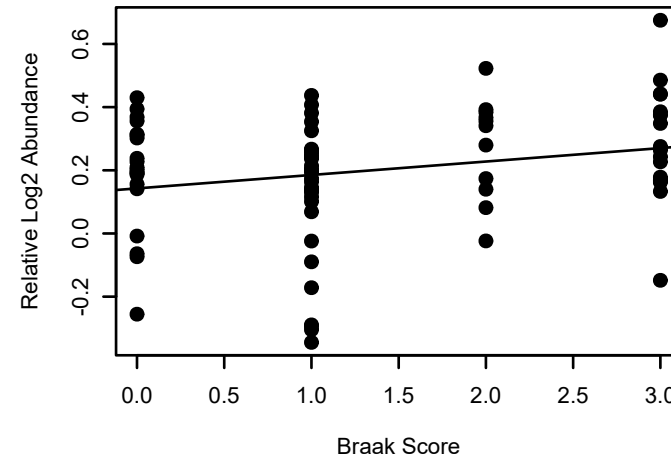

**bicor=0.077, p=0.45**  
**cor=0.087, p=0.39**

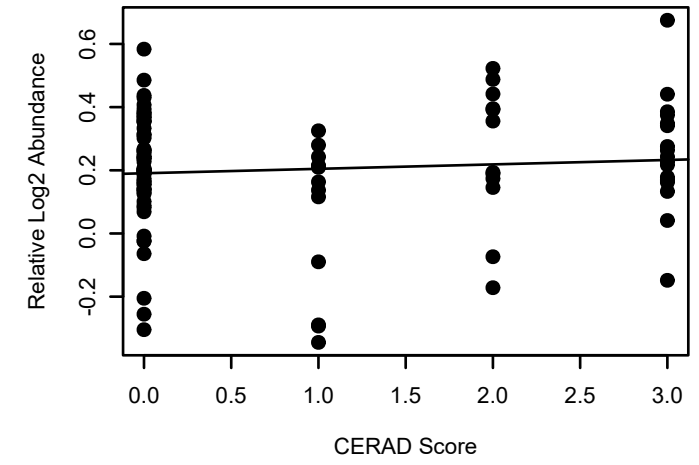

**ATP6V0D1 UPenn Mixed PRM**  
**M1 turquoise MEGA module member**  
**K-W ANOVA p: 0.35**

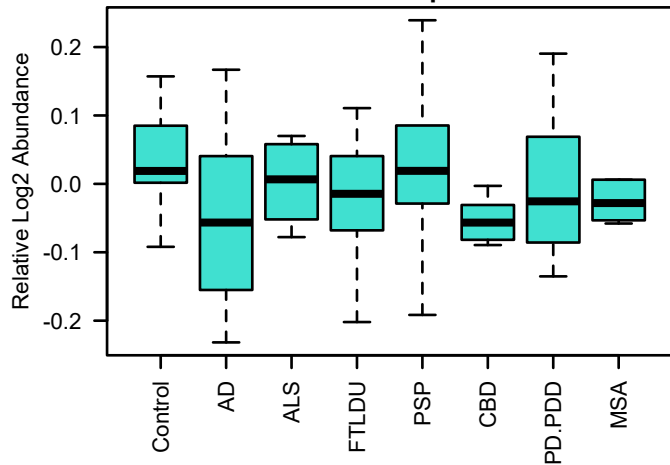

**ATP6V0D1 UPenn Mixed PRM**  
**K-W ANOVA p: 0.04**

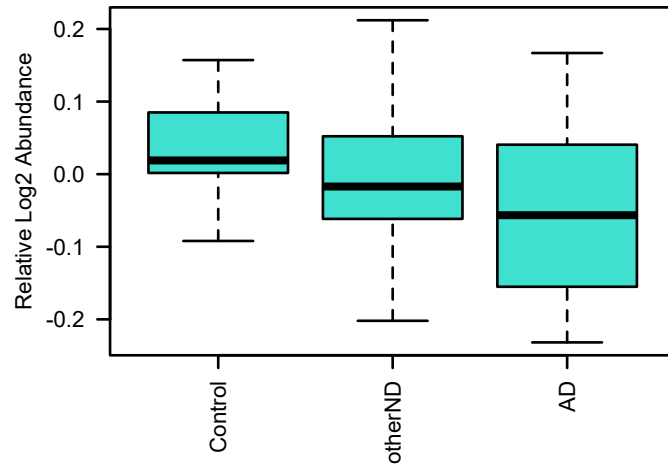

**bicor=-0.21, p=0.055**  
**cor=-0.16, p=0.15**

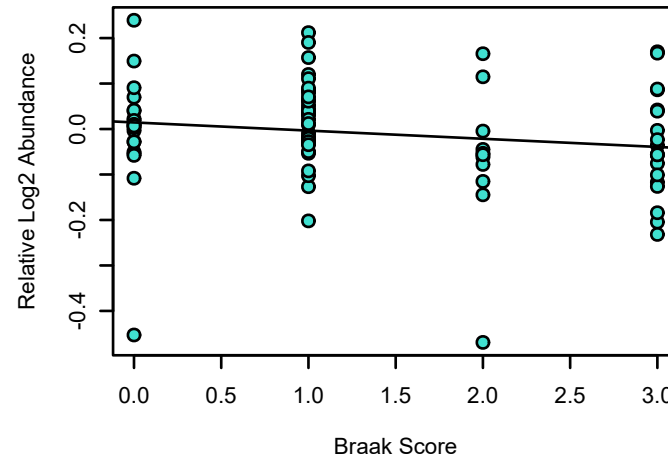

**bicor=-0.12, p=0.22**  
**cor=-0.1, p=0.32**

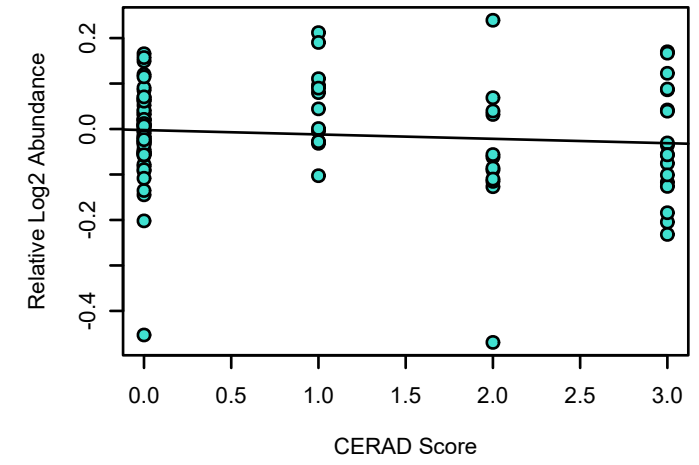

**HNRNPK UPenn Mixed PRM**  
**M10 purple MEGA module member**  
**K-W ANOVA p: 0.016**

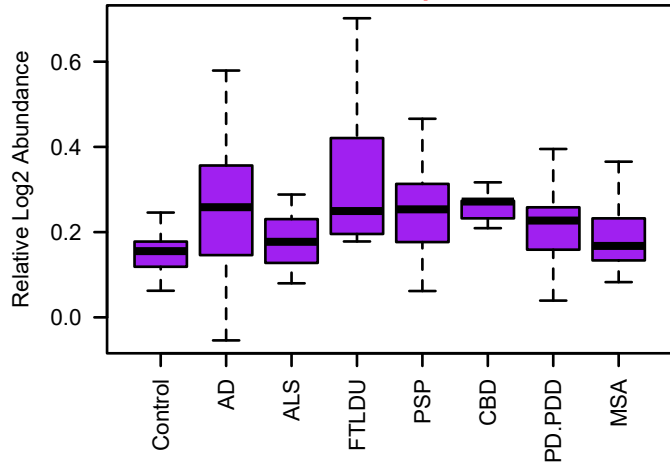

**HNRNPK UPenn Mixed PRM**  
**K-W ANOVA p: 0.076**

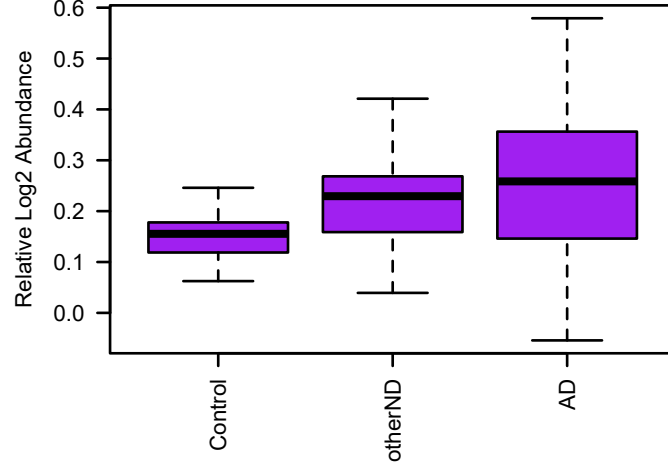

**bicor=0.2, p=0.063**  
**cor=0.25, p=0.022**

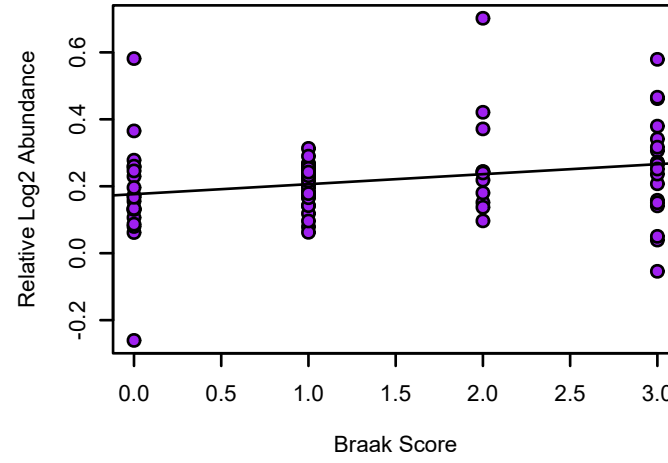

**bicor=0.089, p=0.38**  
**cor=0.1, p=0.32**

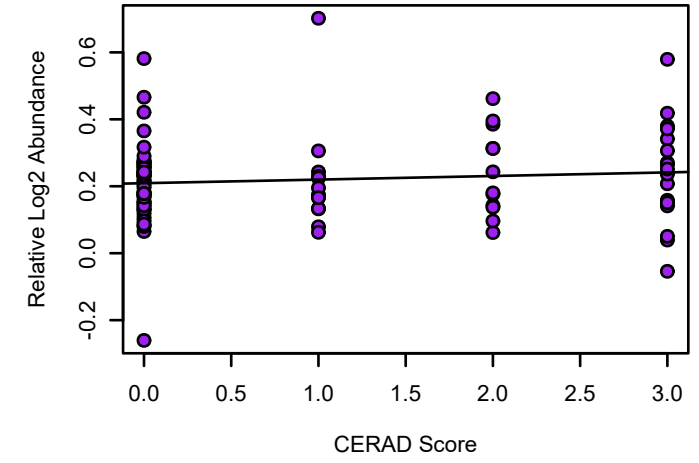

**PPIAL4E UPenn Mixed PRM**  
**NA grey20 MEGA module member**  
**K-W ANOVA p: 0.0045**

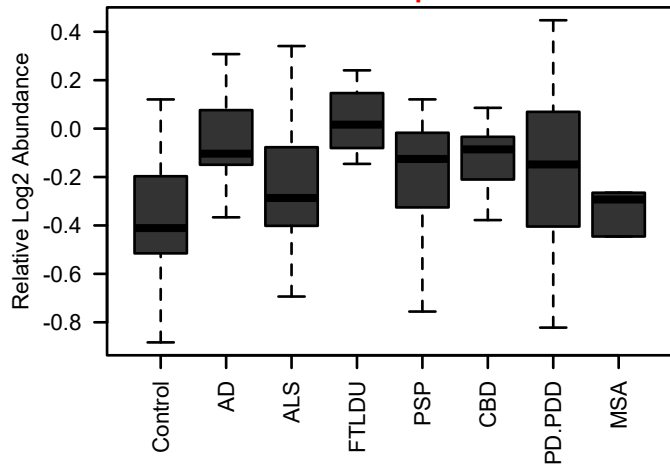

**PPIAL4E UPenn Mixed PRM**  
**K-W ANOVA p: 0.0047**

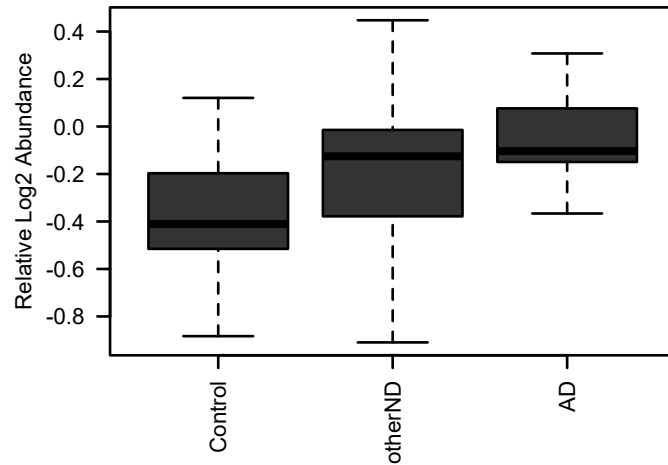

**bicor=0.16, p=0.14**  
**cor=0.23, p=0.035**

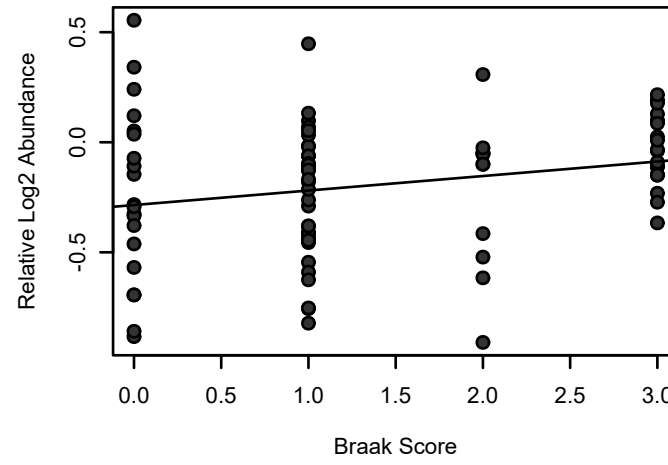

**bicor=0.17, p=0.089**  
**cor=0.17, p=0.091**

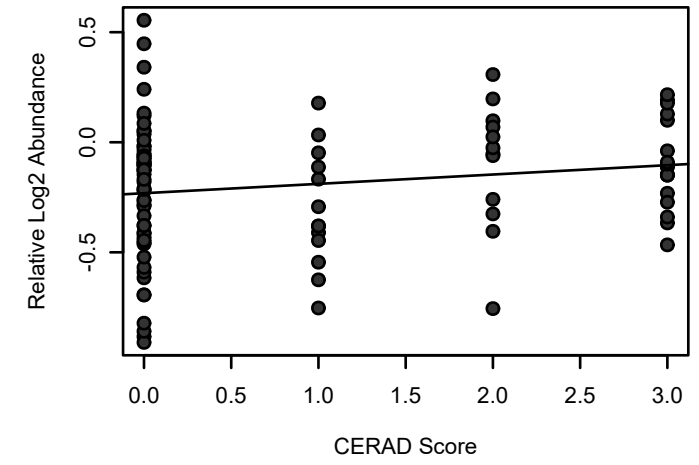

**PPIA UPenn Mixed PRM**  
**M2 blue MEGA module member**  
**K-W ANOVA p: 2.5e-07**

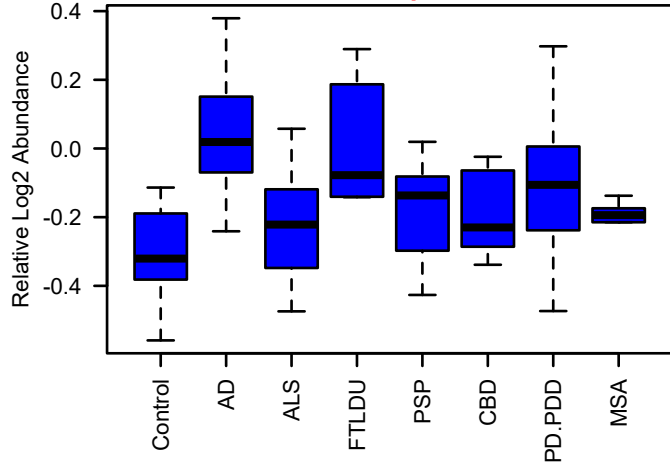

**PPIA UPenn Mixed PRM**  
**K-W ANOVA p: 5.1e-07**

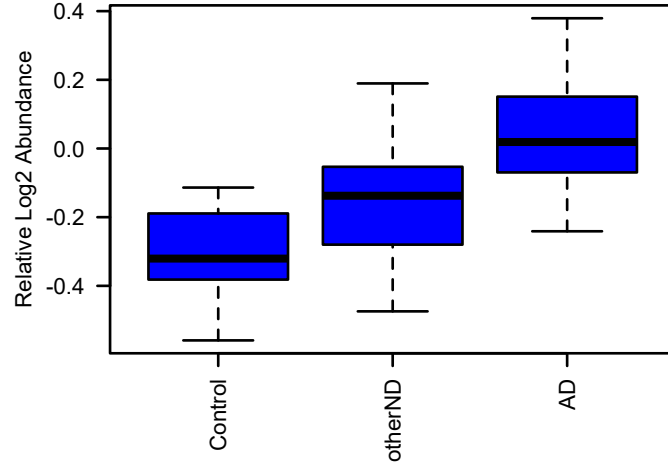

**bicor=0.41, p=0.00011**  
**cor=0.42, p=7e-05**

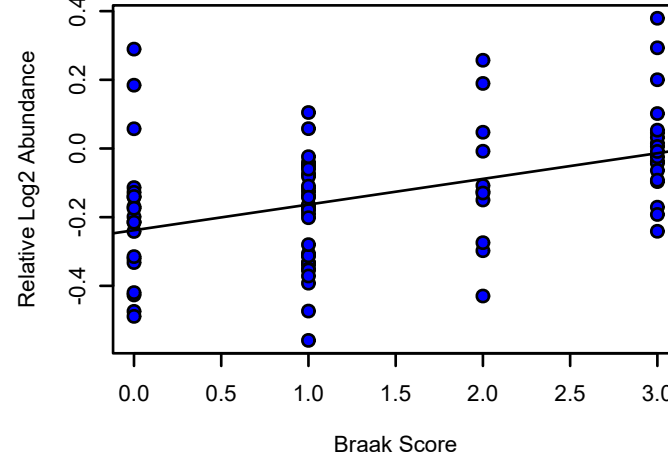

**bicor=0.4, p=3.2e-05**  
**cor=0.4, p=3.7e-05**

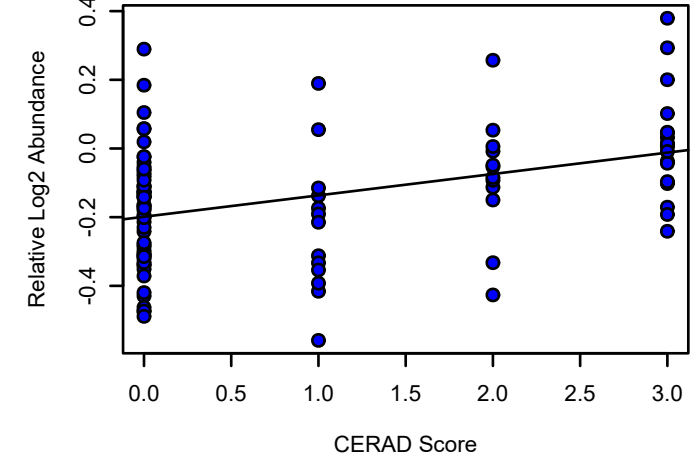

**RAC1 UPenn Mixed PRM**  
NA grey MEGA module member  
K-W ANOVA p: 0.23

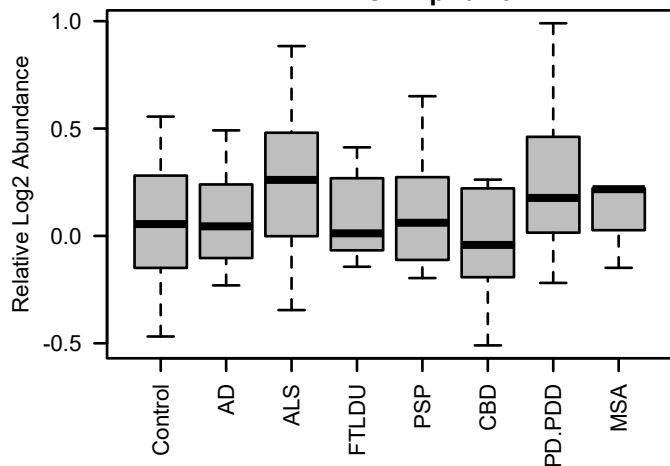

**RAC1 UPenn Mixed PRM**  
K-W ANOVA p: 0.19

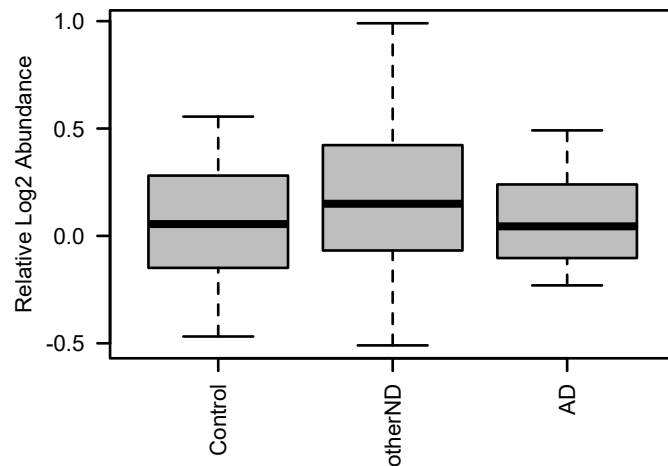

**bicor=-0.033, p=0.76**  
**cor=-0.057, p=0.61**

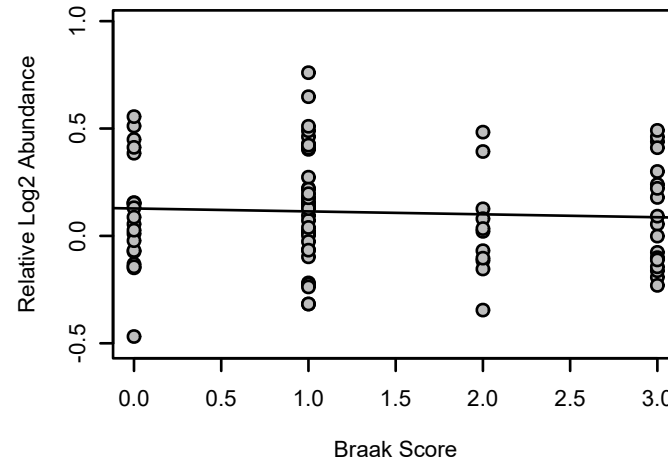

**bicor=0.07, p=0.49**  
**cor=0.059, p=0.56**

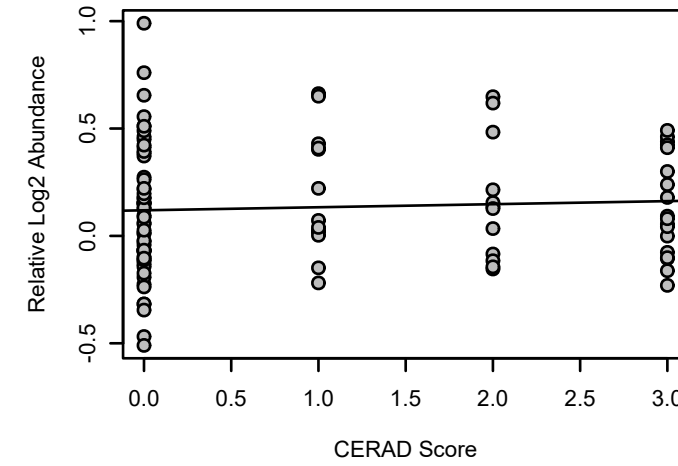

**AP2B1 UPenn Mixed PRM**  
M1 turquoise MEGA module member  
K-W ANOVA p: 0.0029

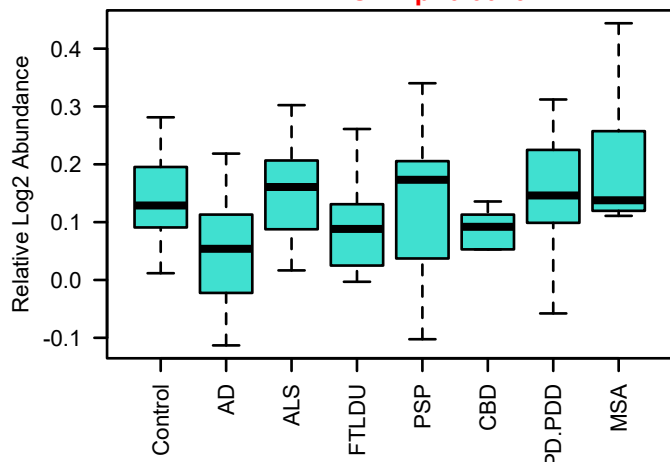

**AP2B1 UPenn Mixed PRM**  
K-W ANOVA p: 0.00053

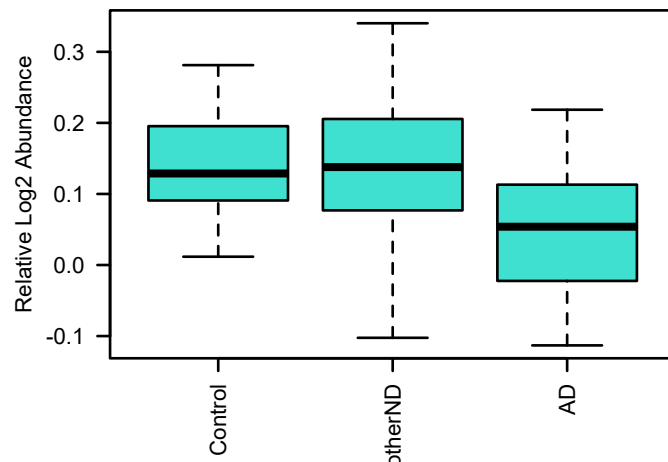

**bicor=-0.27, p=0.013**  
**cor=-0.31, p=0.0041**

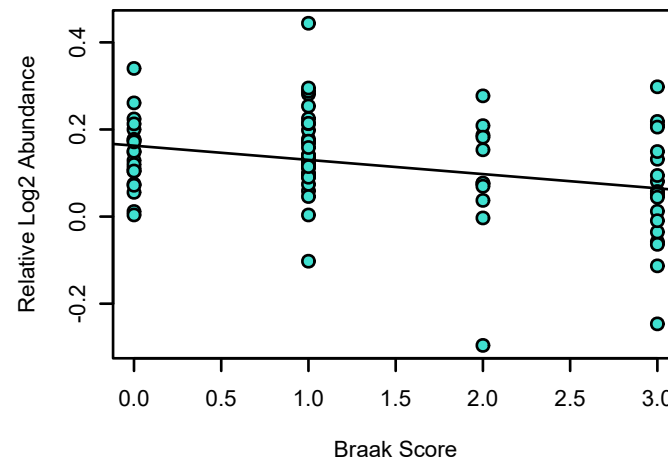

**bicor=-0.25, p=0.013**  
**cor=-0.27, p=0.0066**

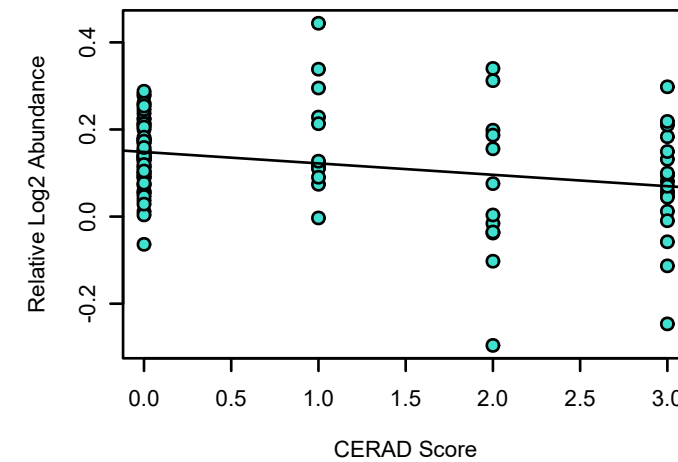

**GNAT3 UPenn Mixed PRM**  
NA grey20 MEGA module member  
K-W ANOVA p: 0.00099

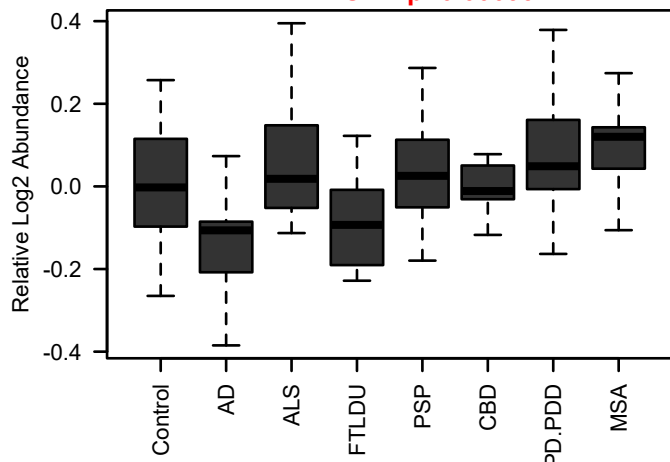

**GNAT3 UPenn Mixed PRM**  
K-W ANOVA p: 0.00047

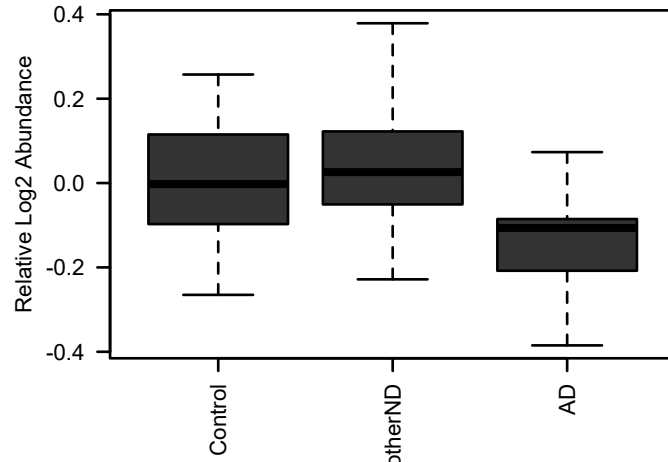

**bicor=-0.25, p=0.024**  
**cor=-0.28, p=0.0099**

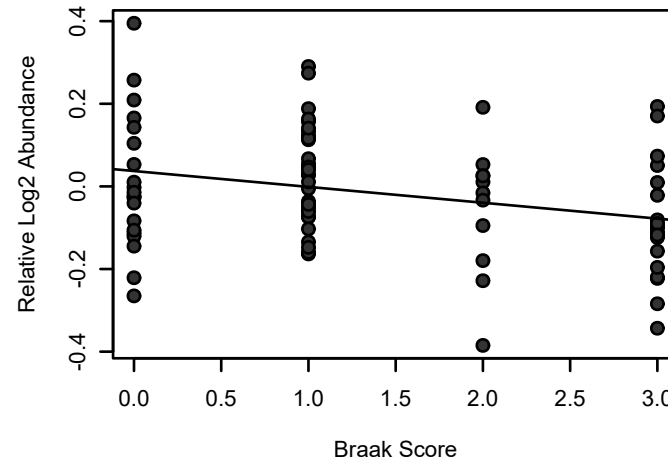

**bicor=-0.22, p=0.03**  
**cor=-0.22, p=0.028**

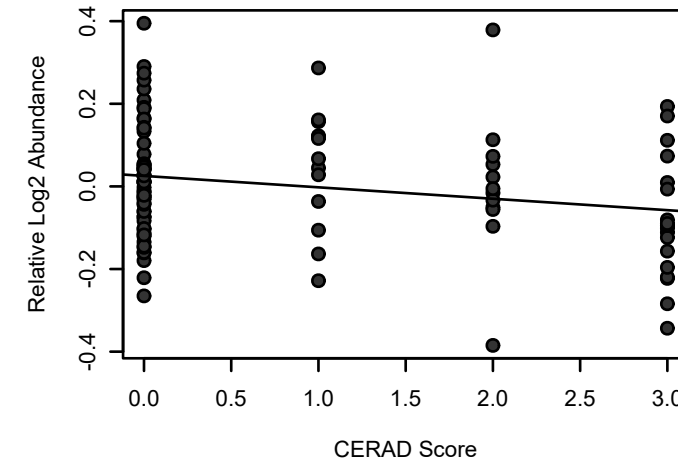

**GNAI1 UPenn Mixed PRM**  
M1 turquoise MEGA module member  
K-W ANOVA p: 1.2e-07

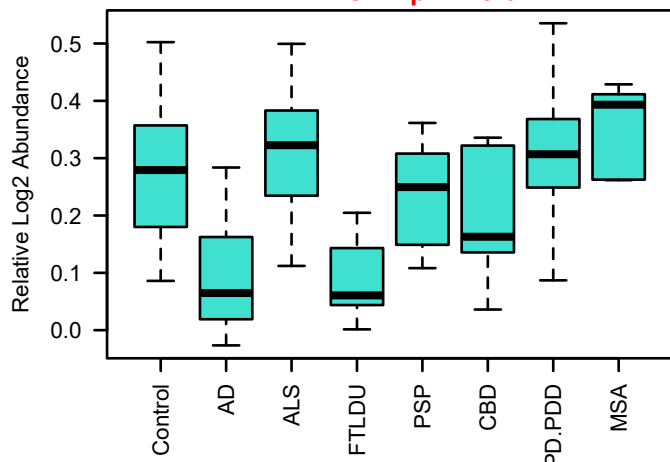

**GNAI1 UPenn Mixed PRM**  
K-W ANOVA p: 1.9e-06

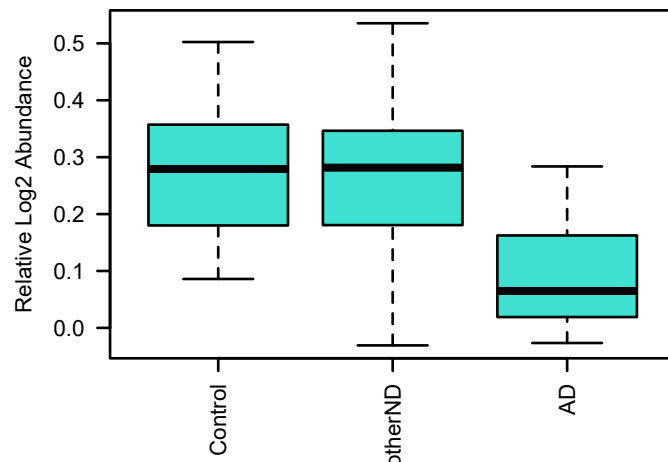

**bicor=-0.35, p=0.0013**  
**cor=-0.35, p=0.0011**

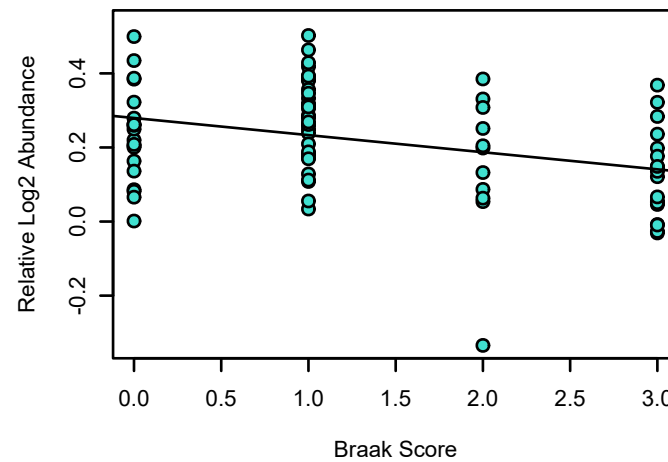

**bicor=-0.29, p=0.0032**  
**cor=-0.3, p=0.0024**

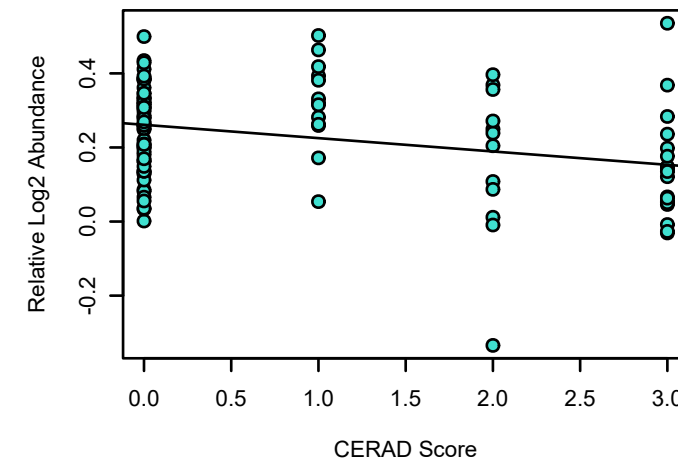



**SIRPA UPenn Mixed PRM**  
M1 turquoise MEGA module member  
K-W ANOVA p: 0.0011

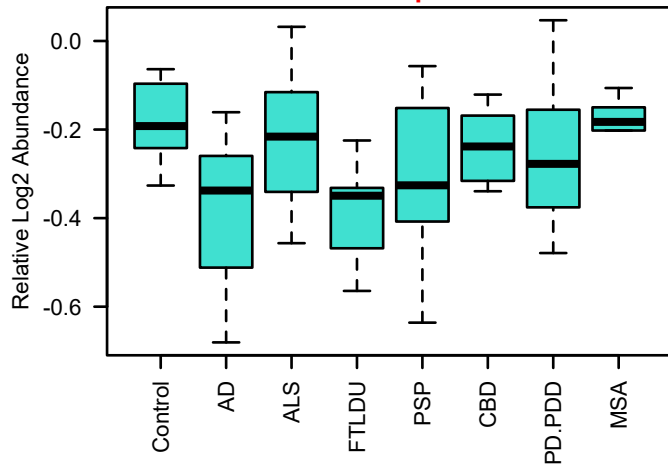

**SIRPA UPenn Mixed PRM**  
K-W ANOVA p: 0.0013

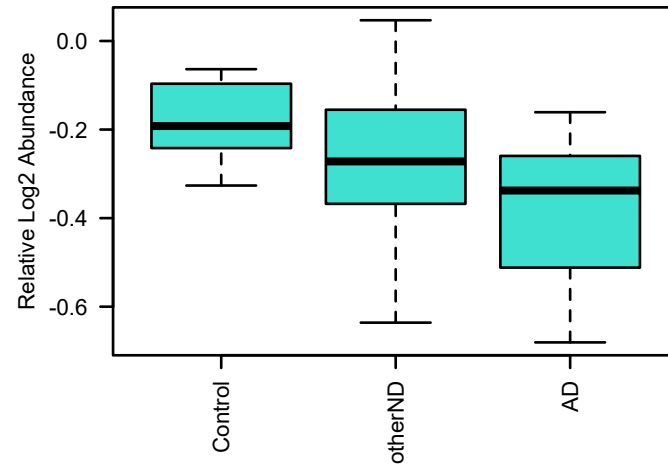

**bicor=-0.34, p=0.0014**  
**cor=-0.34, p=0.0016**

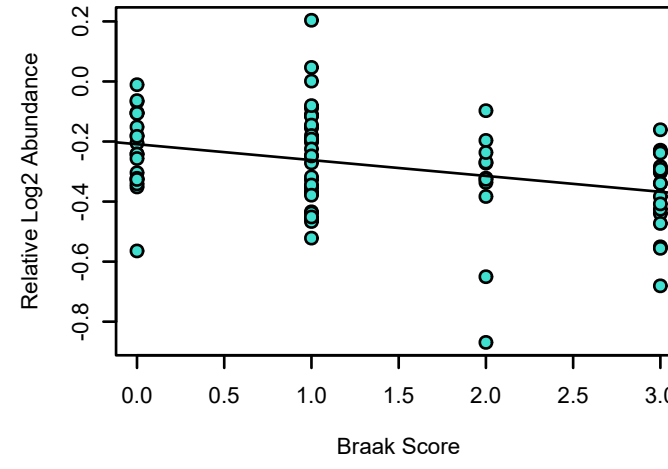

**bicor=-0.28, p=0.0054**  
**cor=-0.28, p=0.0048**

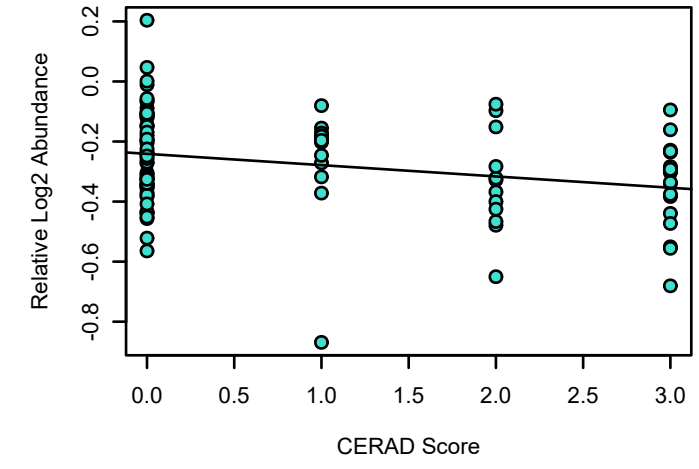

**DLG4 UPenn Mixed PRM**  
M1 turquoise MEGA module member  
K-W ANOVA p: 3.5e-07

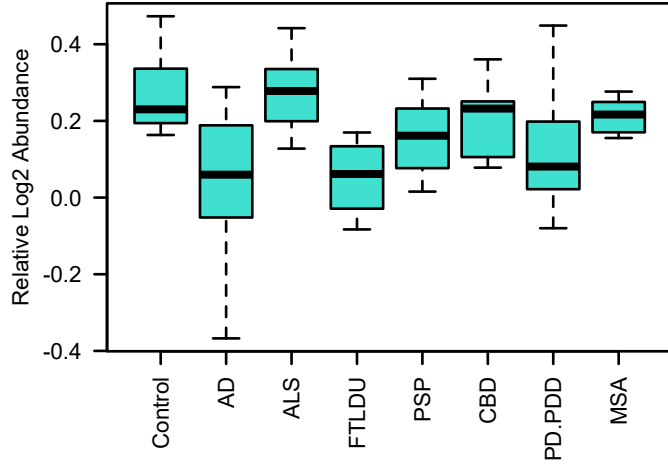

**DLG4 UPenn Mixed PRM**  
K-W ANOVA p: 7e-05

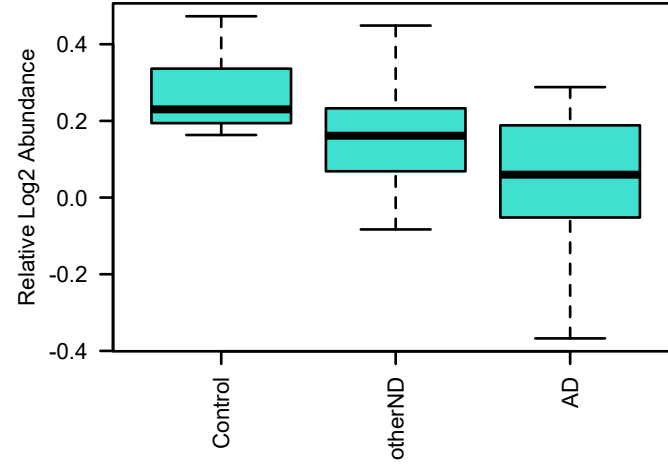

**bicor=-0.35, p=0.0011**  
**cor=-0.37, p=0.00053**

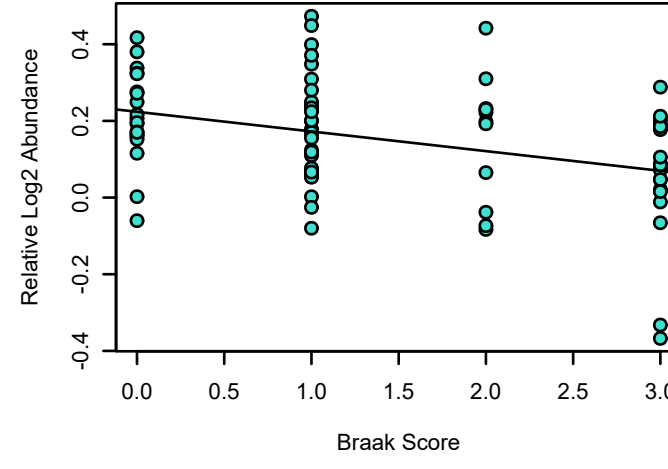

**bicor=-0.32, p=0.00099**  
**cor=-0.36, p=0.00023**

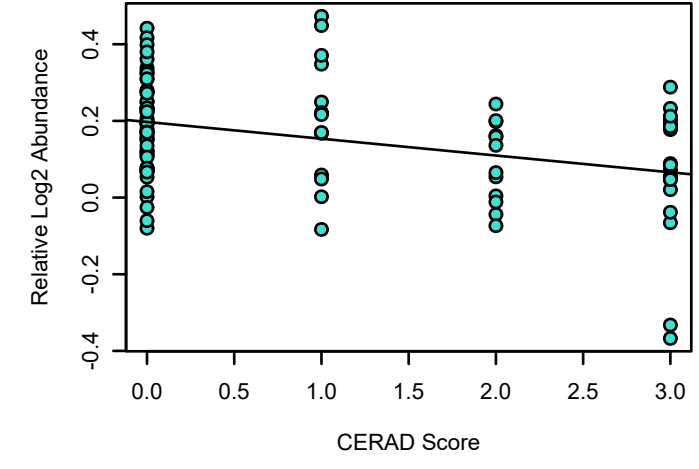

**ABAT UPenn Mixed PRM**  
M3 brown MEGA module member  
K-W ANOVA p: 0.0094

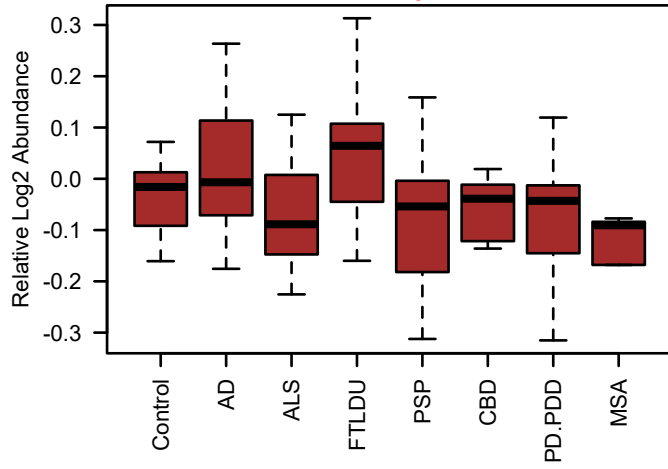

**ABAT UPenn Mixed PRM**  
K-W ANOVA p: 0.01

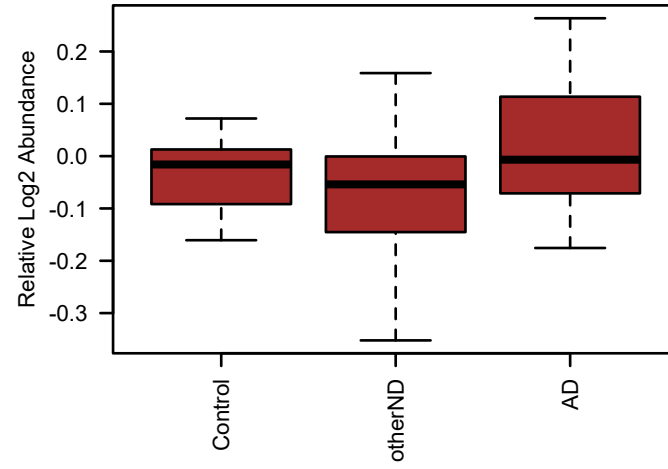

**bicor=-0.051, p=0.64**  
**cor=0.077, p=0.49**

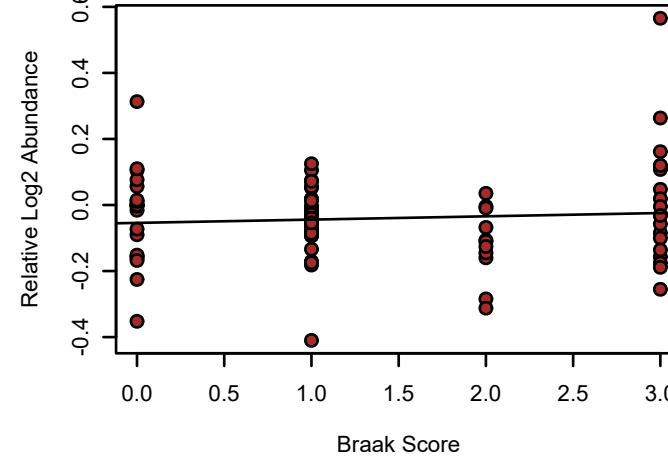

**bicor=0.056, p=0.58**  
**cor=0.14, p=0.16**

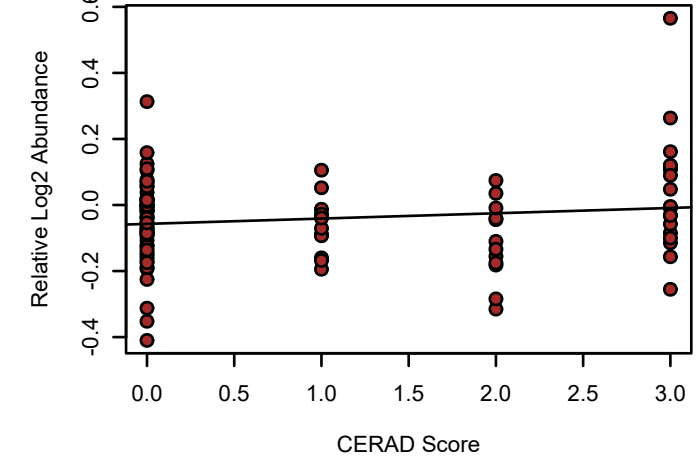

**HPCA UPenn Mixed PRM**  
M1 turquoise MEGA module member  
K-W ANOVA p: 0.009

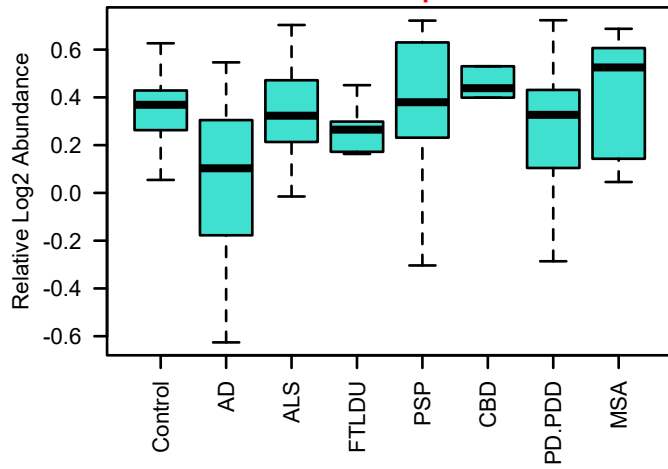

**HPCA UPenn Mixed PRM**  
K-W ANOVA p: 0.00038

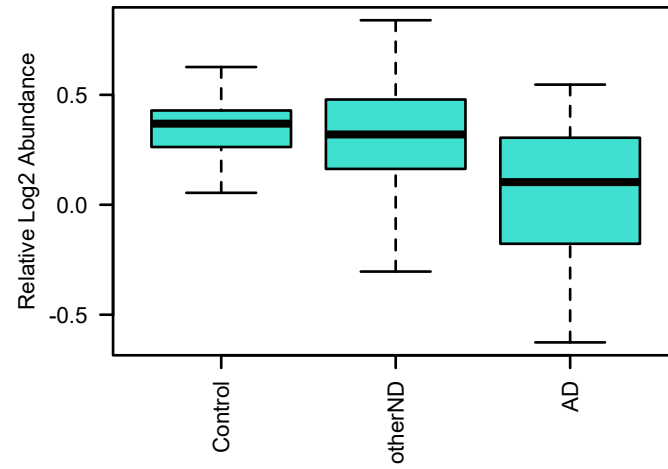

**bicor=-0.27, p=0.011**  
**cor=-0.33, p=0.0022**

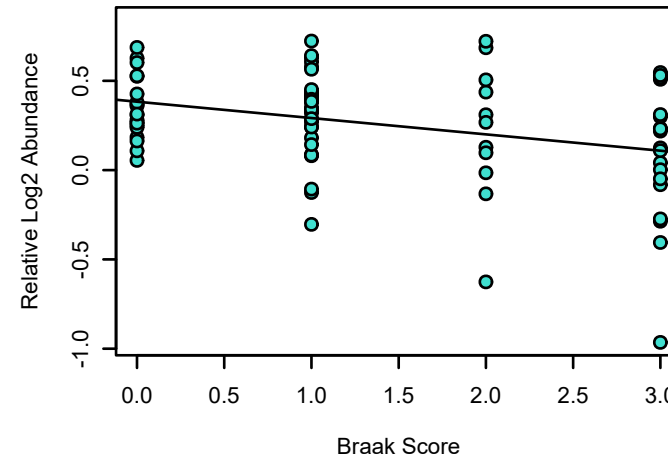

**bicor=-0.28, p=0.0046**  
**cor=-0.35, p=0.00036**

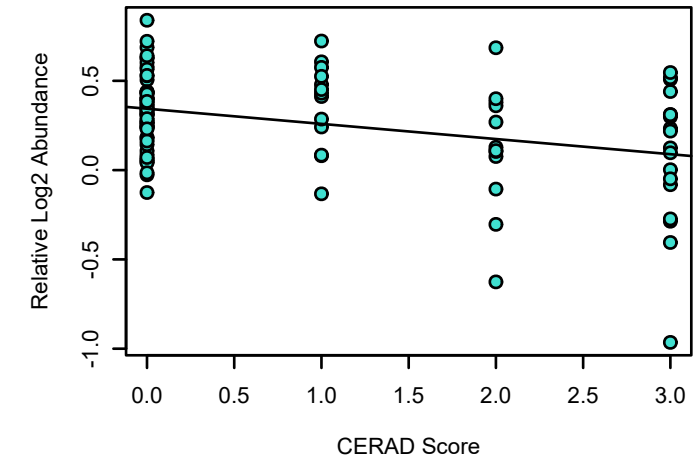

**CLTC UPenn Mixed PRM**  
**M1 turquoise MEGA module member**  
**K-W ANOVA p: 0.00091**

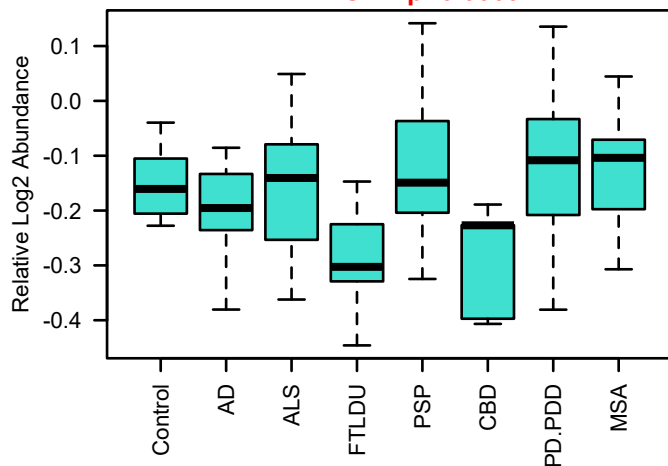

**CLTC UPenn Mixed PRM**  
**K-W ANOVA p: 0.32**

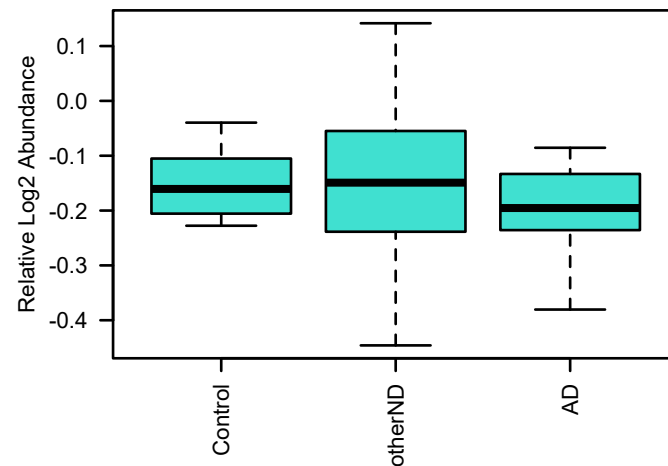

**bicor=-0.14, p=0.2**  
**cor=-0.13, p=0.24**

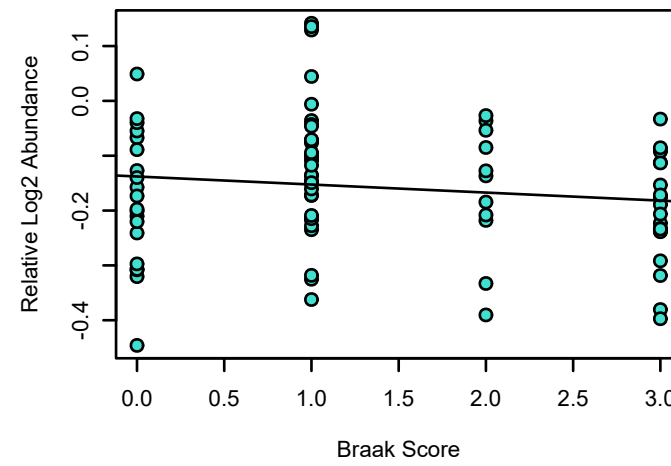

**bicor=-0.088, p=0.39**  
**cor=-0.08, p=0.43**

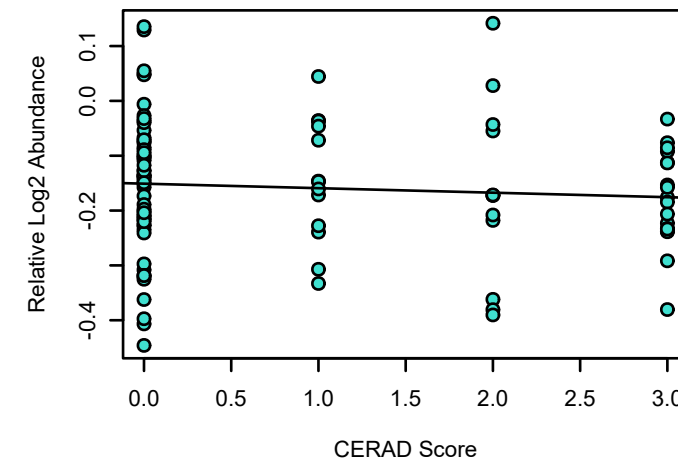

**HNRNPU UPenn Mixed PRM**  
**M10 purple MEGA module member**  
**K-W ANOVA p: 0.00047**

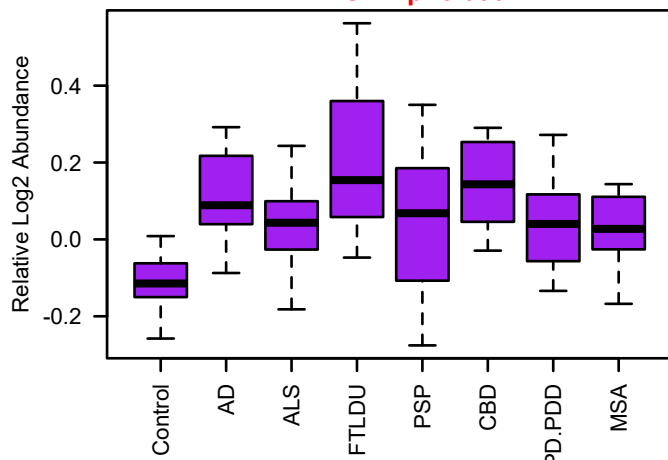

**HNRNPU UPenn Mixed PRM**  
**K-W ANOVA p: 0.00099**

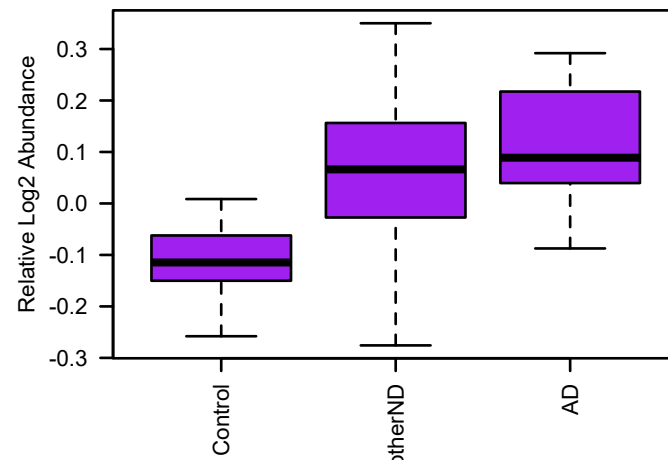

**bicor=0.3, p=0.005**  
**cor=0.3, p=0.0056**

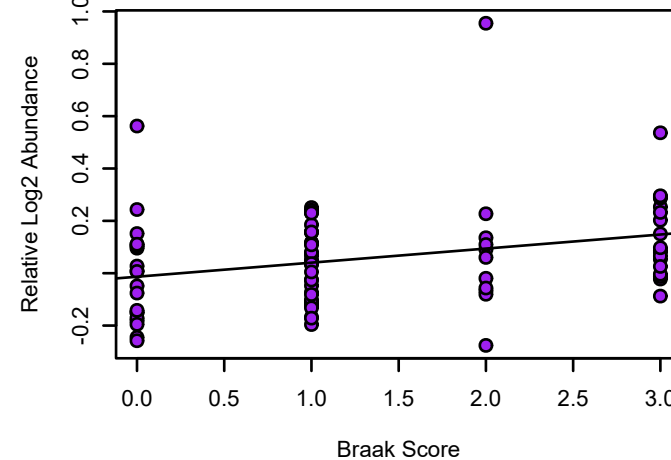

**bicor=0.14, p=0.16**  
**cor=0.13, p=0.2**

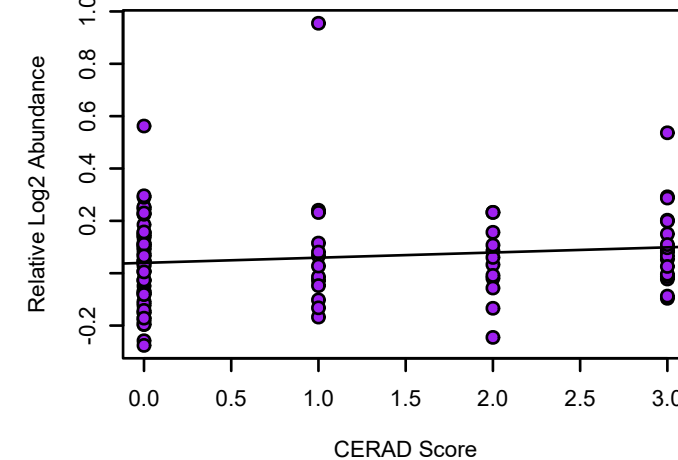

**SPTBN1 UPenn Mixed PRM**  
**NA grey MEGA module member**  
**K-W ANOVA p: 0.24**

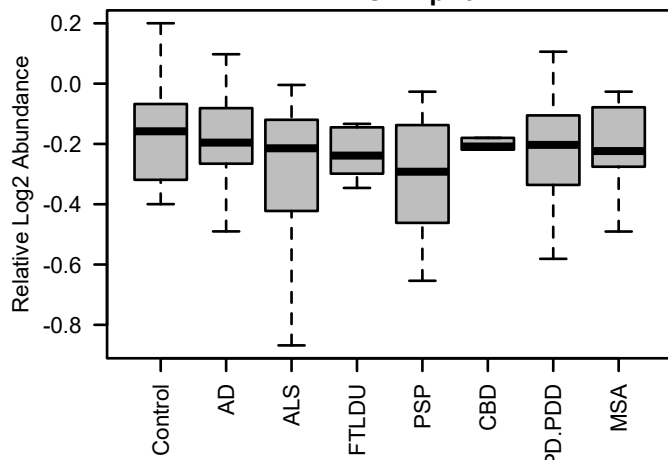

**SPTBN1 UPenn Mixed PRM**  
**K-W ANOVA p: 0.11**

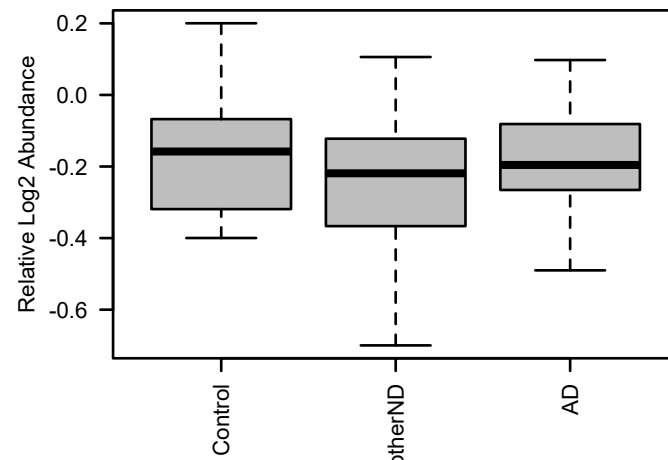

**bicor=0.015, p=0.89**  
**cor=0.056, p=0.61**

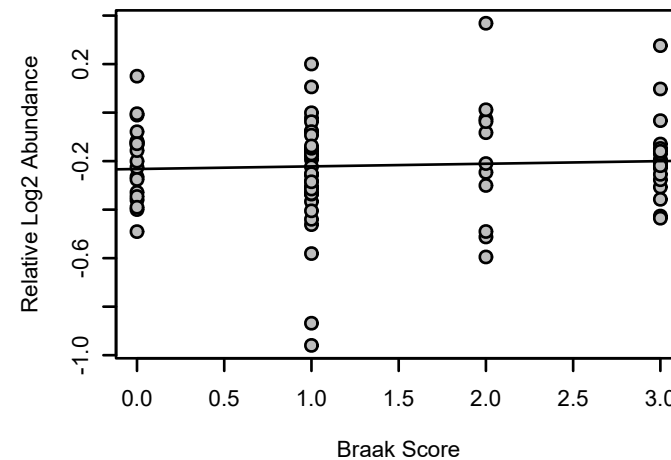

**bicor=0.14, p=0.16**  
**cor=0.13, p=0.2**

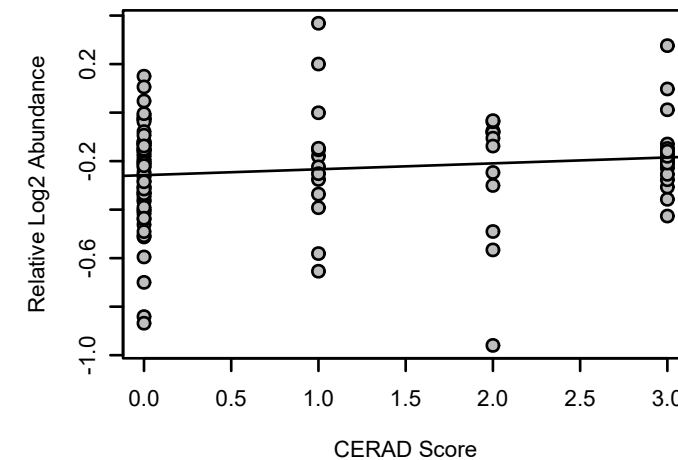

**ANK2 UPenn Mixed PRM**  
**M6 red MEGA module member**  
**K-W ANOVA p: 0.00036**

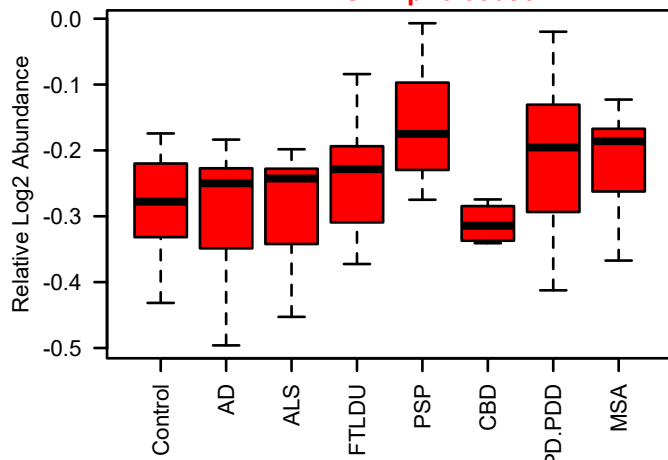

**ANK2 UPenn Mixed PRM**  
**K-W ANOVA p: 0.013**

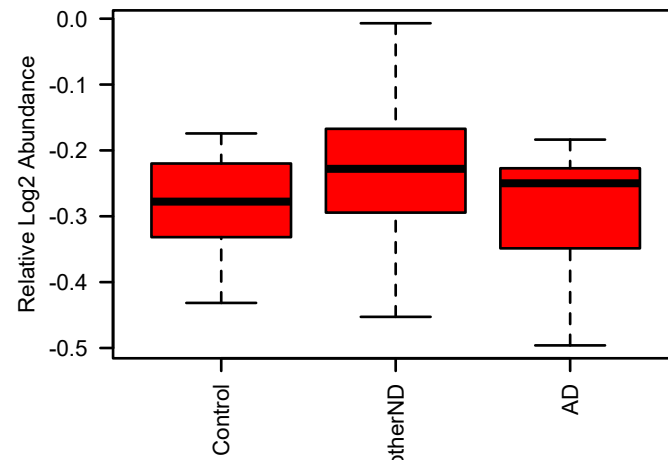

**bicor=-0.16, p=0.16**  
**cor=-0.14, p=0.2**

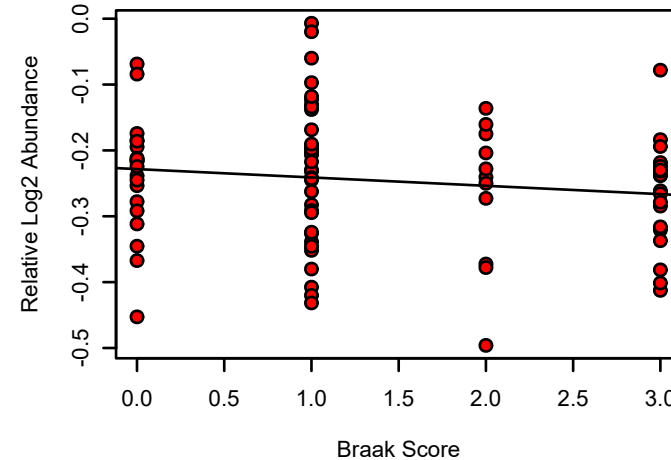

**bicor=0.018, p=0.86**  
**cor=0.0088, p=0.93**

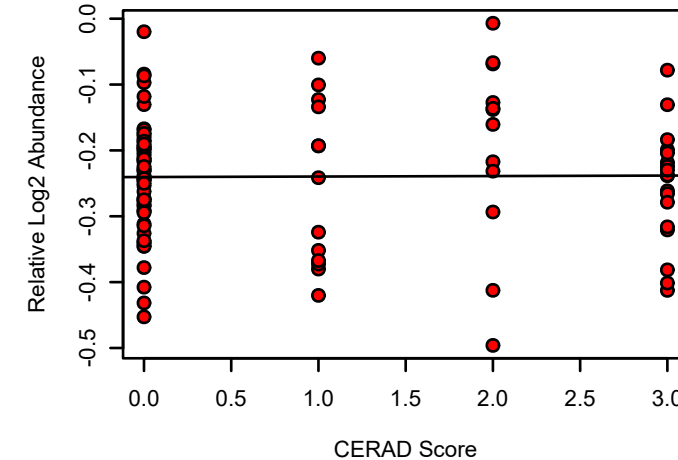

**ATP2B2 UPenn Mixed PRM**  
M3 brown MEGA module member  
K-W ANOVA p: 0.0013

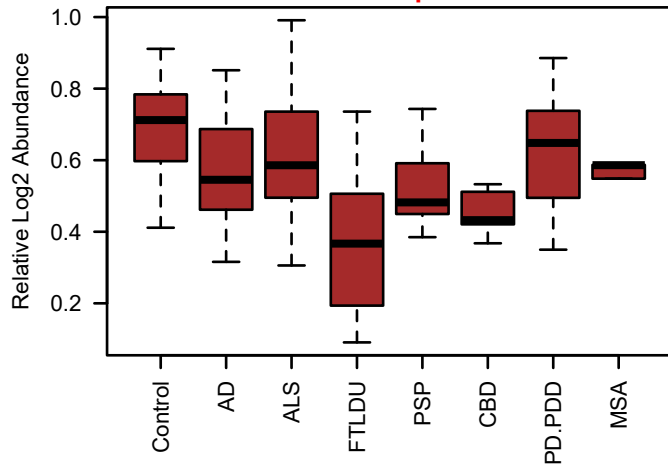

**ATP2B2 UPenn Mixed PRM**  
K-W ANOVA p: 0.023

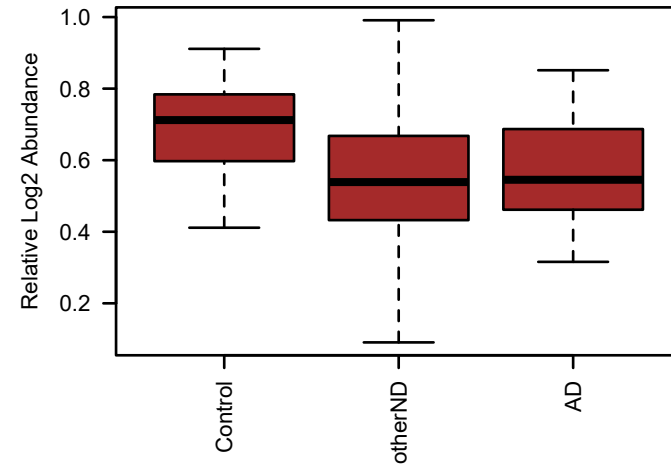

**bicor=-0.14, p=0.22**  
**cor=-0.13, p=0.24**

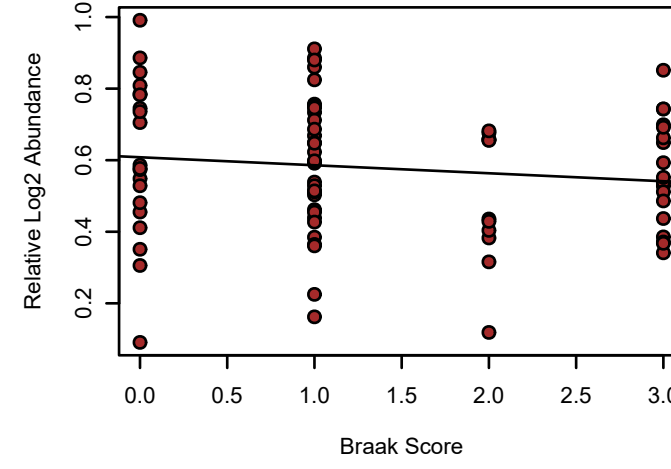

**bicor=-0.065, p=0.52**  
**cor=-0.057, p=0.57**

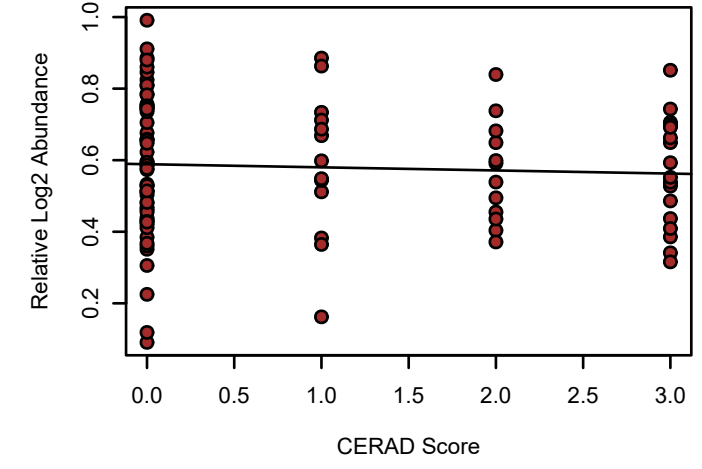

**FKBP4 UPenn Mixed PRM**  
M11 greenyellow MEGA module member  
K-W ANOVA p: 0.72

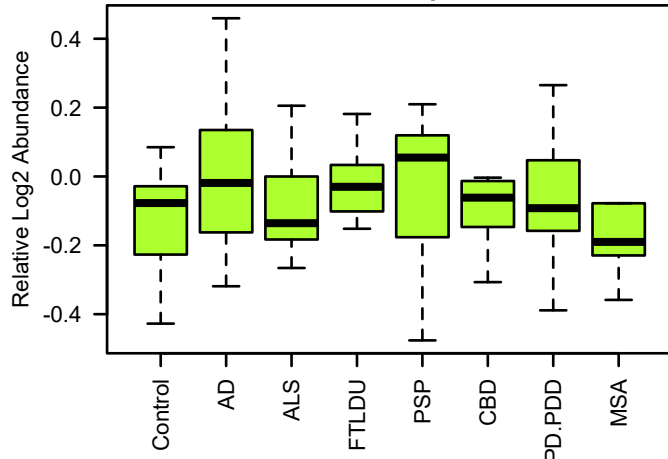

**FKBP4 UPenn Mixed PRM**  
K-W ANOVA p: 0.18

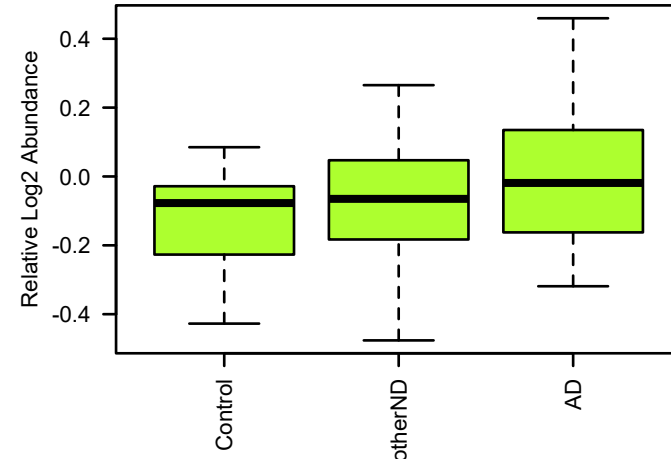

**bicor=0.17, p=0.12**  
**cor=0.2, p=0.068**

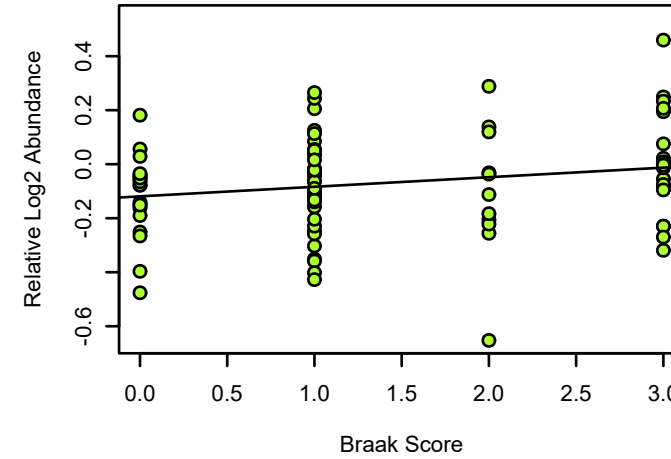

**bicor=0.014, p=0.89**  
**cor=0.017, p=0.87**

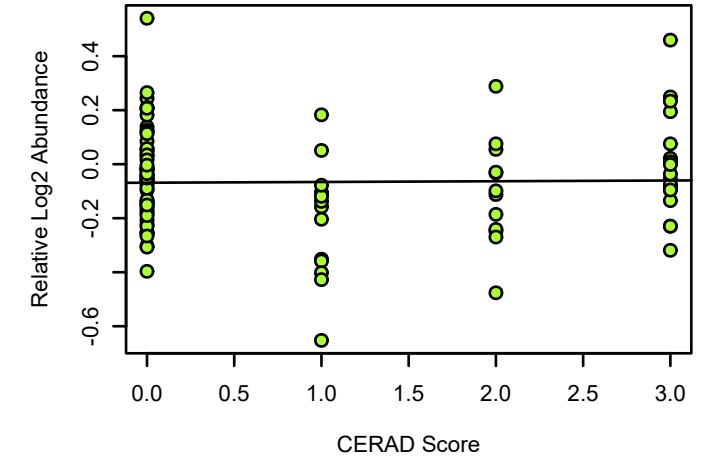

**SLC25A11 UPenn Mixed PRM**  
M3 brown MEGA module member  
K-W ANOVA p: 0.38

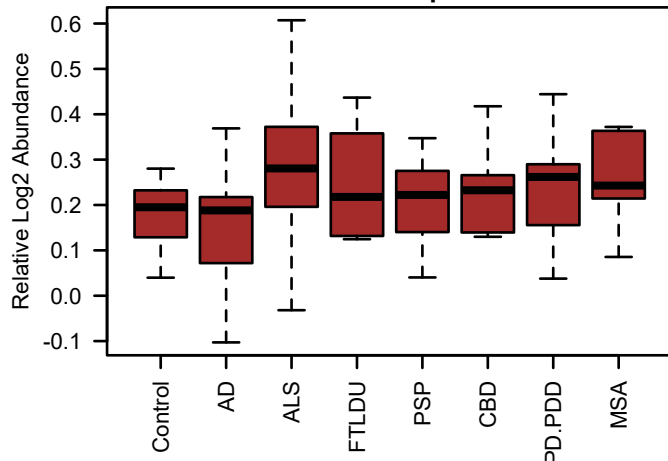

**SLC25A11 UPenn Mixed PRM**  
K-W ANOVA p: 0.075

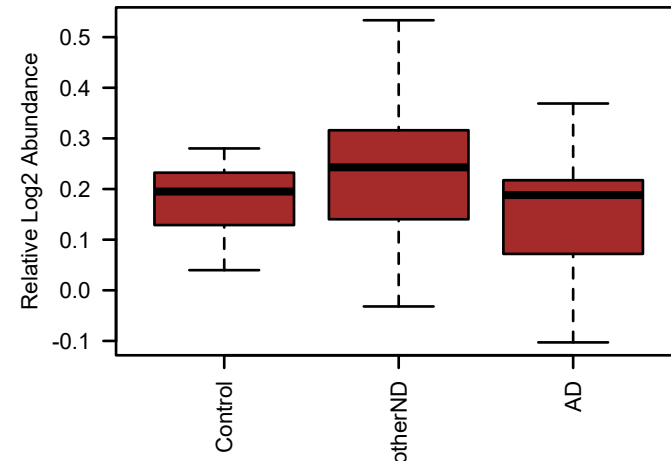

**bicor=-0.21, p=0.061**  
**cor=-0.18, p=0.1**

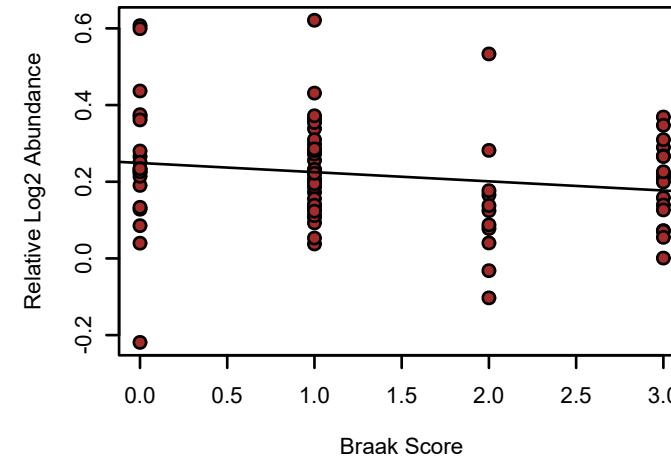

**bicor=-0.19, p=0.052**  
**cor=-0.19, p=0.058**

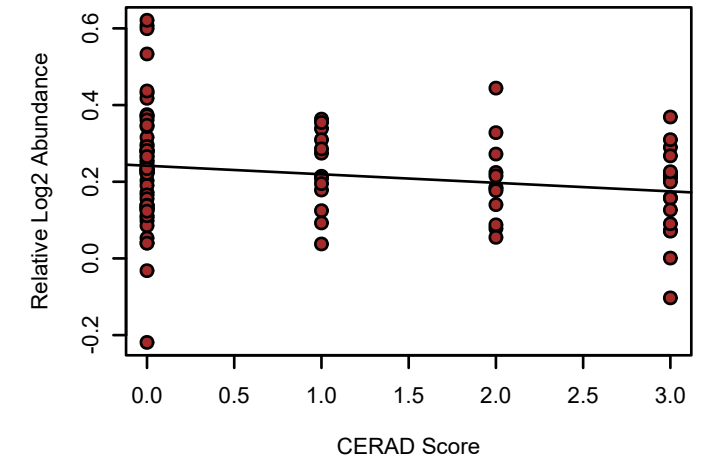

**LMNB2 UPenn Mixed PRM**  
M10 purple MEGA module member  
K-W ANOVA p: 1.1e-07

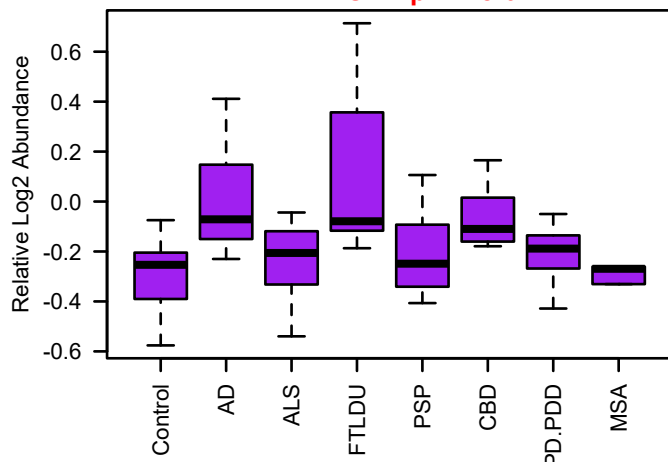

**LMNB2 UPenn Mixed PRM**  
K-W ANOVA p: 1e-04

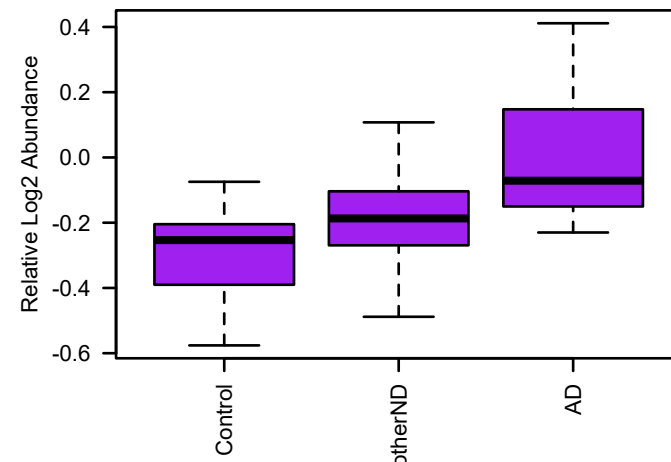

**bicor=0.4, p=0.00019**  
**cor=0.35, p=0.0011**

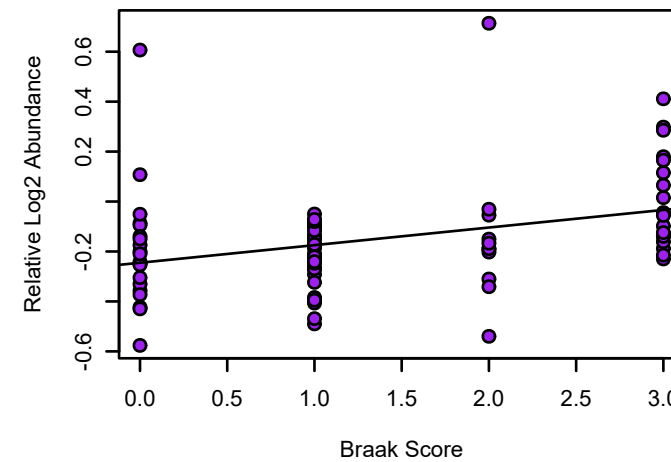

**bicor=0.24, p=0.018**  
**cor=0.22, p=0.028**

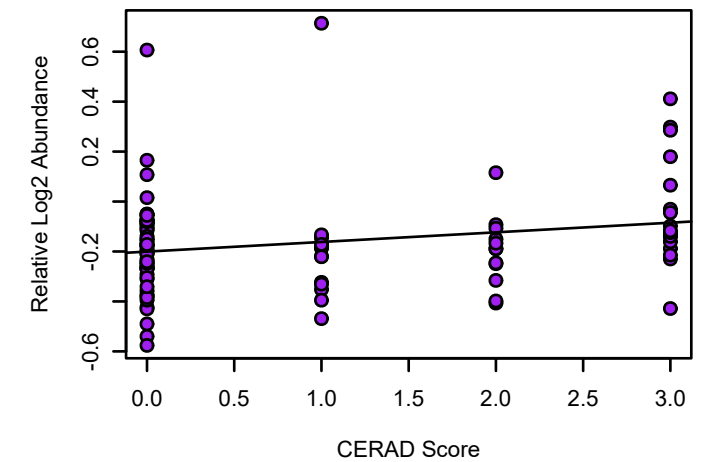

**PRDX4 UPenn Mixed PRM**  
NA grey MEGA module member  
K-W ANOVA p: 3.8e-07

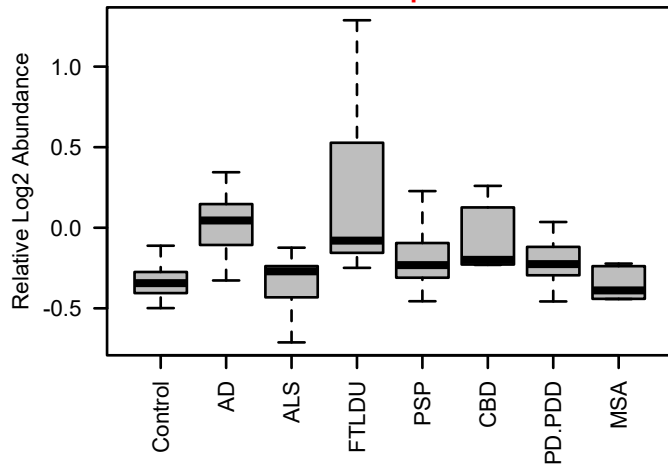

**PRDX4 UPenn Mixed PRM**  
K-W ANOVA p: 0.00012

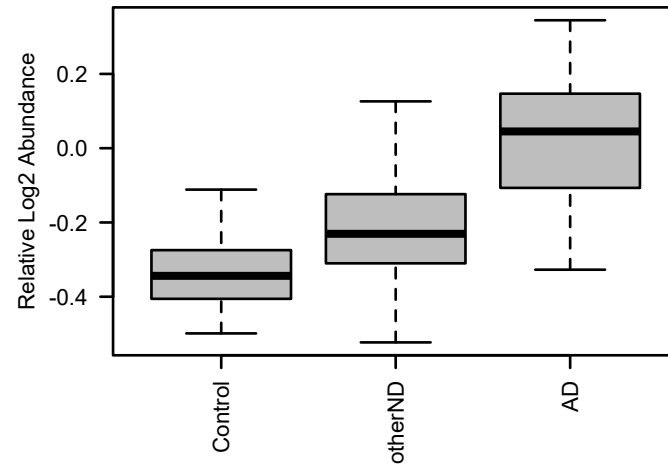

**bicor=0.53, p=2.7e-07**  
**cor=0.4, p=0.00016**

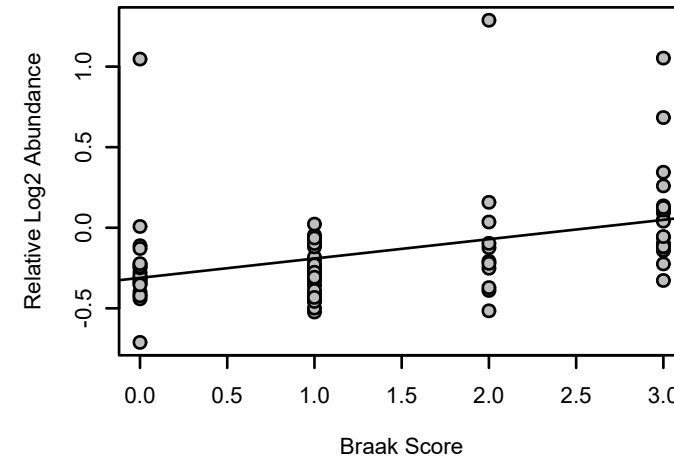

**bicor=0.39, p=6.3e-05**  
**cor=0.32, p=0.0012**

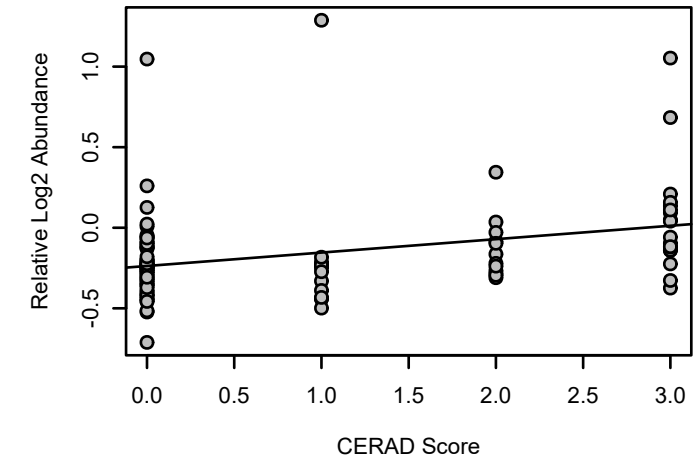

**PRDX1 UPenn Mixed PRM**  
M4 yellow MEGA module member  
K-W ANOVA p: 0.0012

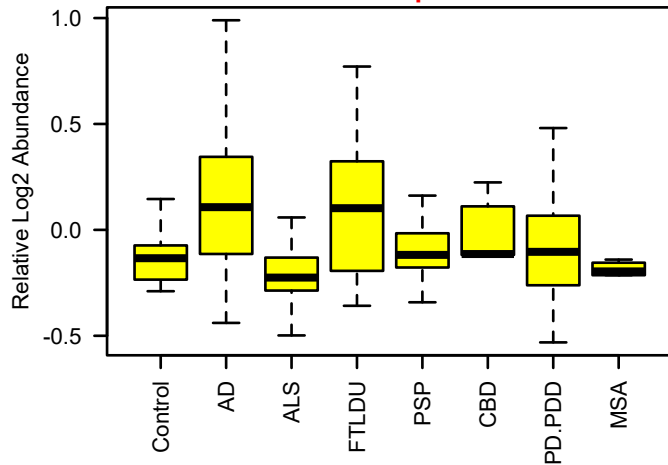

**PRDX1 UPenn Mixed PRM**  
K-W ANOVA p: 0.0012

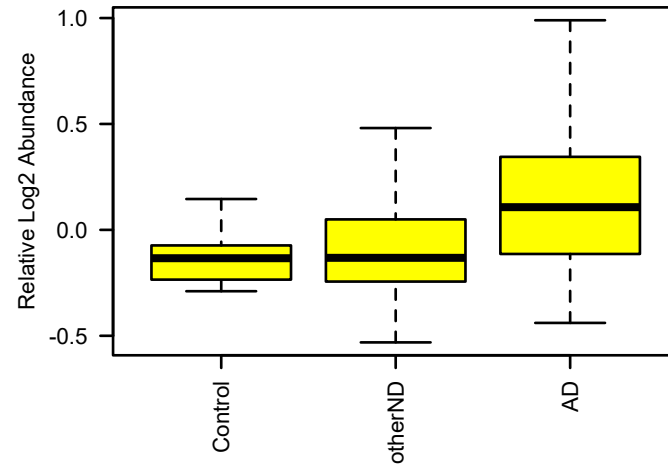

**bicor=0.31, p=0.0046**  
**cor=0.3, p=0.0056**

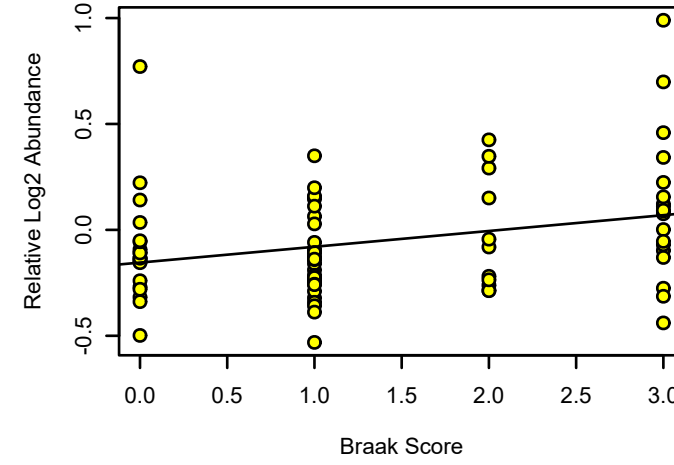

**bicor=0.22, p=0.026**  
**cor=0.27, p=0.0066**

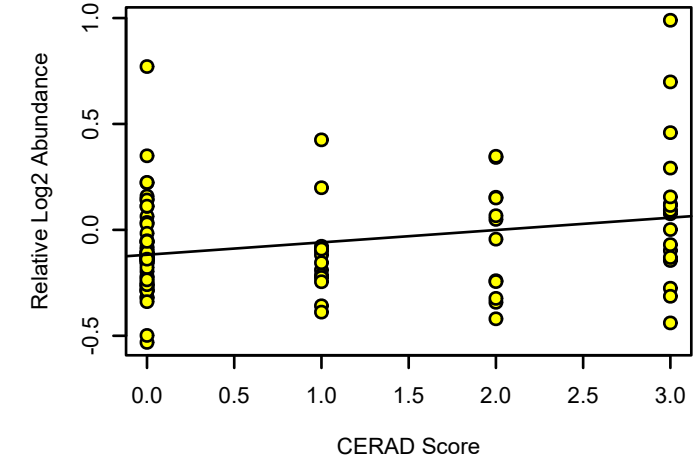

**SRSF1 UPenn Mixed PRM**  
M10 purple MEGA module member  
K-W ANOVA p: 5.2e-07

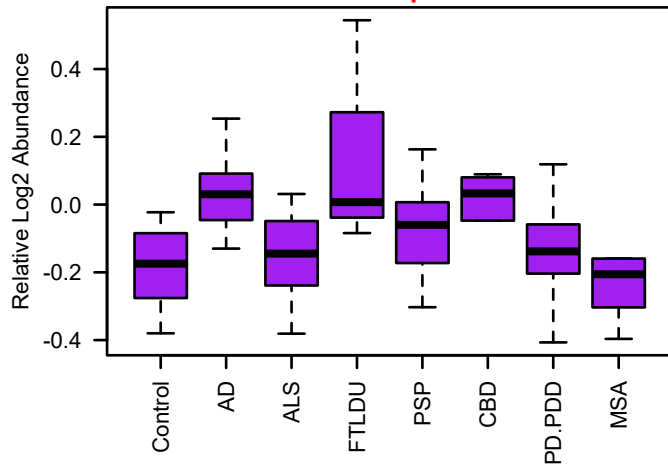

**SRSF1 UPenn Mixed PRM**  
K-W ANOVA p: 0.00017

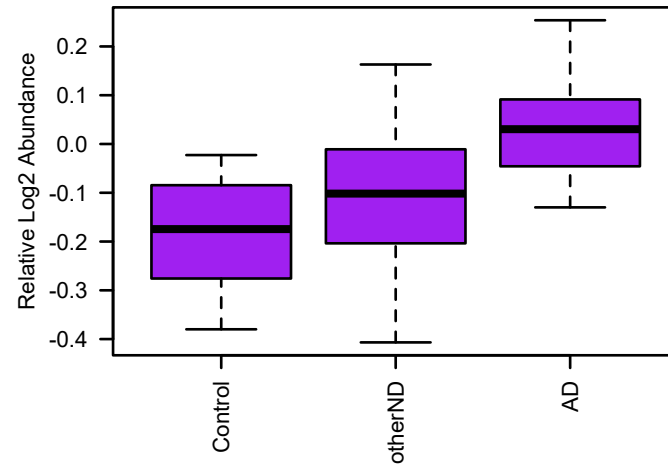

**bicor=0.36, p=0.00067**  
**cor=0.36, p=0.00077**

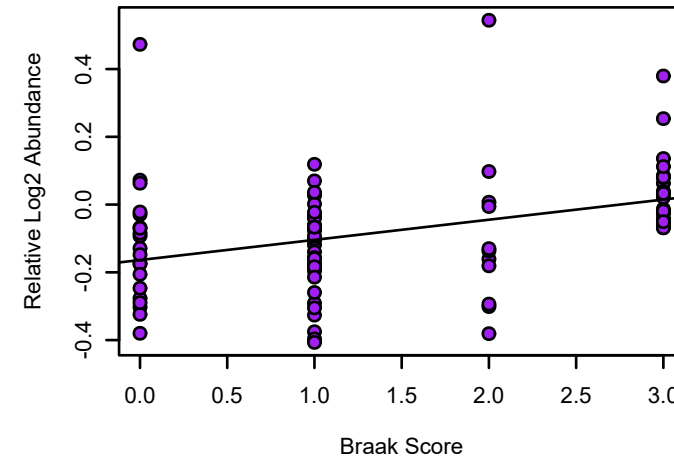

**bicor=0.28, p=0.0055**  
**cor=0.25, p=0.012**

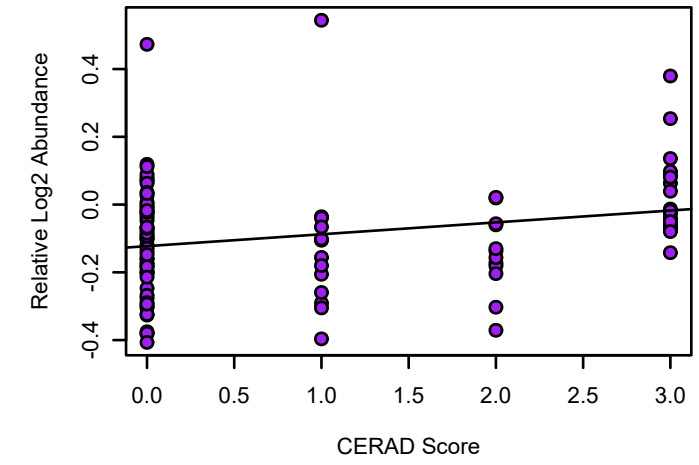

**ILF3 UPenn Mixed PRM**  
M10 purple MEGA module member  
K-W ANOVA p: 0.038

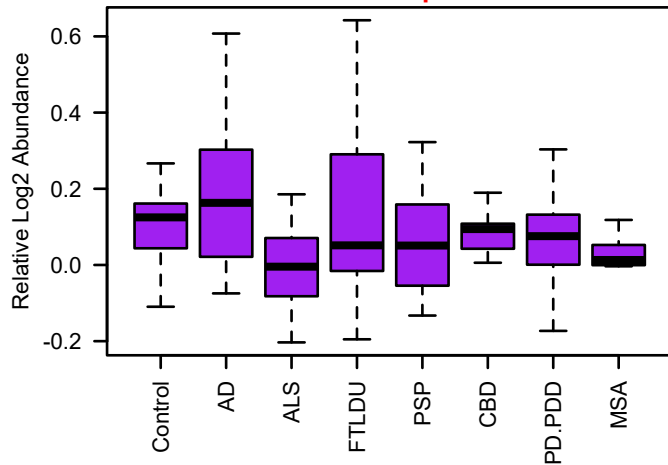

**ILF3 UPenn Mixed PRM**  
K-W ANOVA p: 0.018

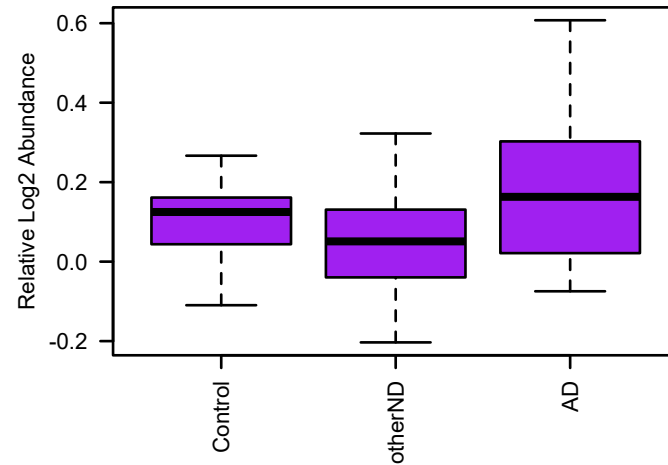

**bicor=0.2, p=0.066**  
**cor=0.23, p=0.035**

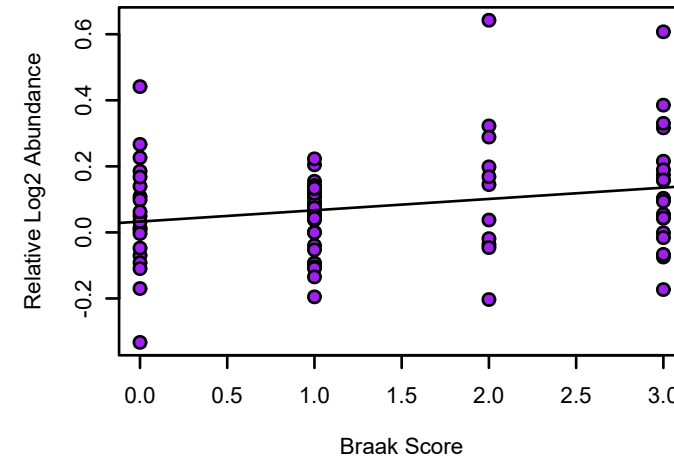

**bicor=0.13, p=0.2**  
**cor=0.16, p=0.11**

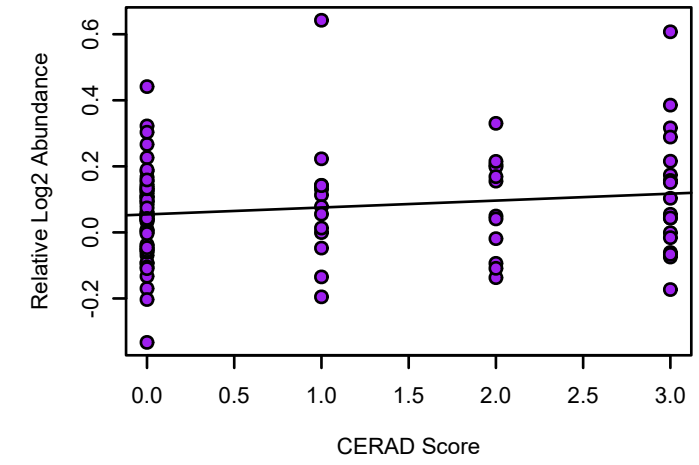



**PAK1 UPenn Mixed PRM**  
M1 turquoise MEGA module member  
K-W ANOVA p: 6.3e-06

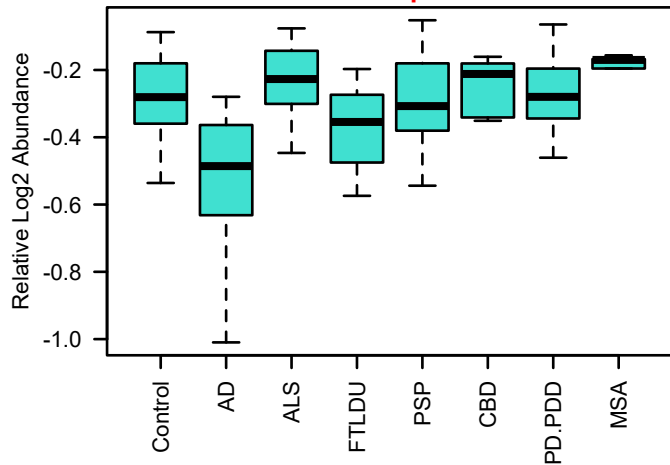

**PAK1 UPenn Mixed PRM**  
K-W ANOVA p: 1.4e-06

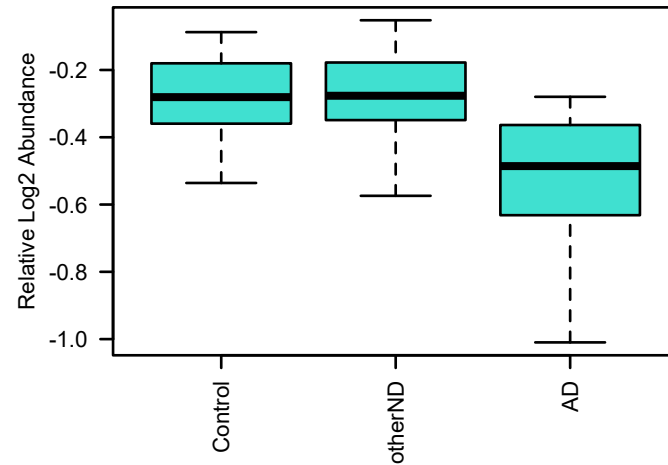

**bicor=-0.37, p=0.00056**  
**cor=-0.44, p=2.8e-05**

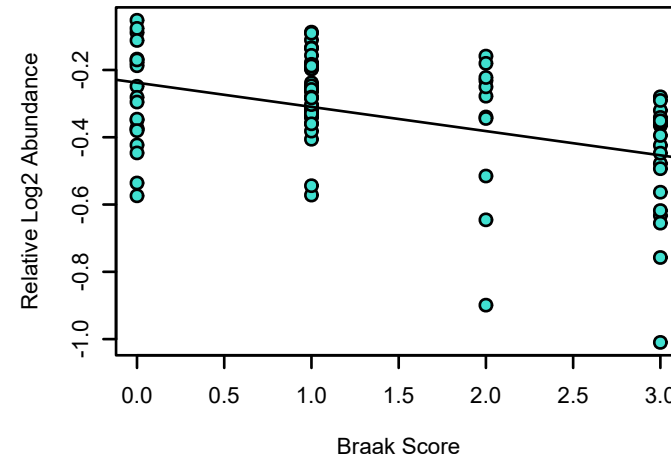

**bicor=-0.42, p=1.5e-05**  
**cor=-0.44, p=4.6e-06**

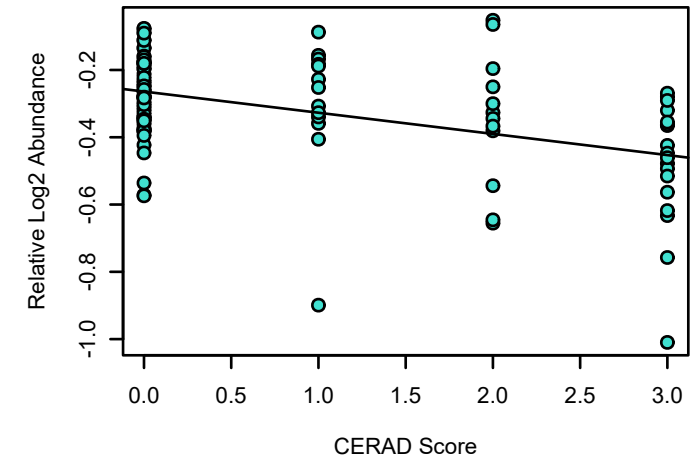

**AP3B2 UPenn Mixed PRM**  
M1 turquoise MEGA module member  
K-W ANOVA p: 1.5e-07

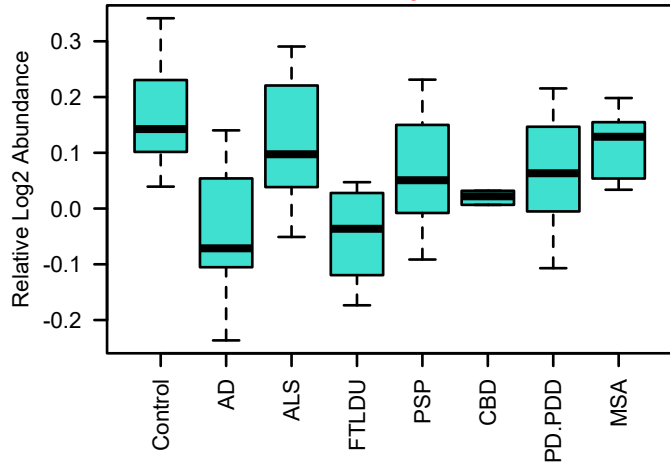

**AP3B2 UPenn Mixed PRM**  
K-W ANOVA p: 2.8e-07

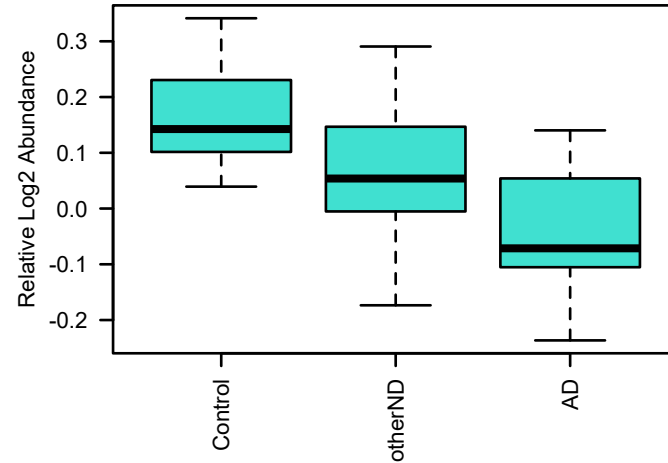

**bicor=-0.31, p=0.0047**  
**cor=-0.35, p=0.0011**

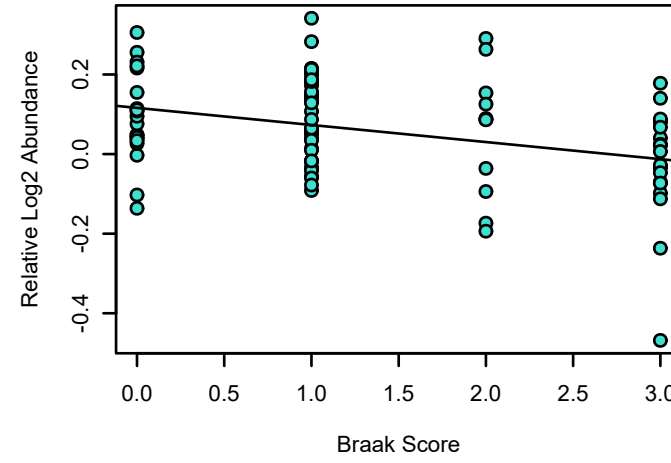

**bicor=-0.29, p=0.0032**  
**cor=-0.34, p=0.00054**

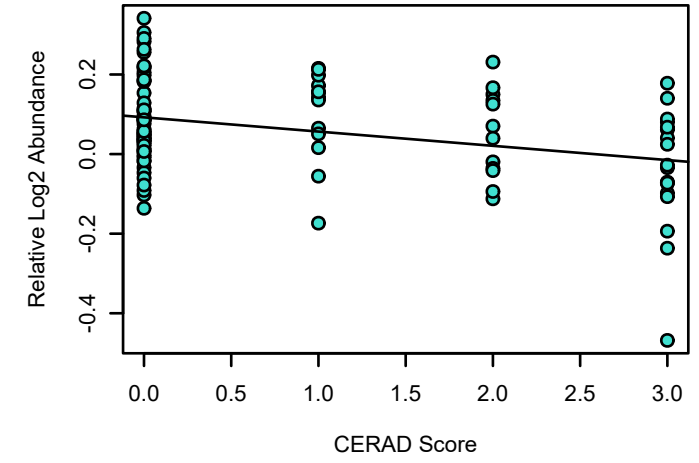

**NNT UPenn Mixed PRM**  
M3 brown MEGA module member  
K-W ANOVA p: 0.00079

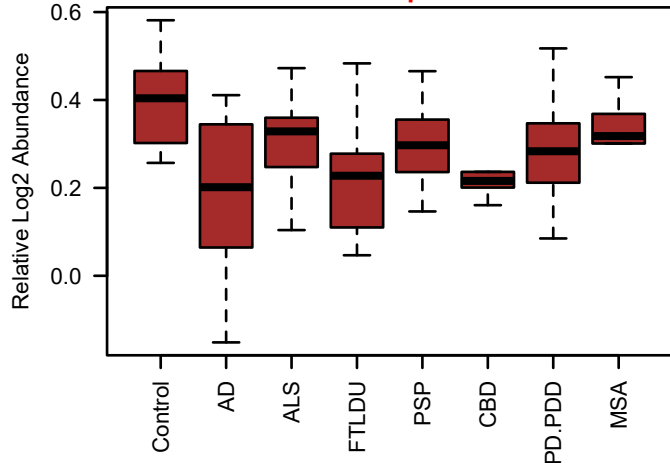

**NNT UPenn Mixed PRM**  
K-W ANOVA p: 0.00018

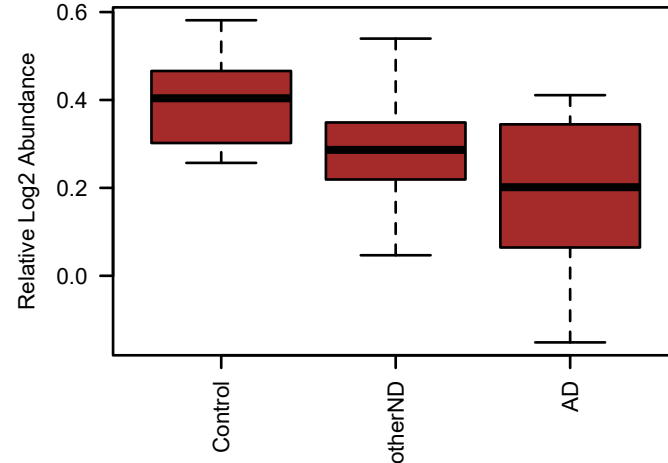

**bicor=-0.34, p=0.0017**  
**cor=-0.32, p=0.003**

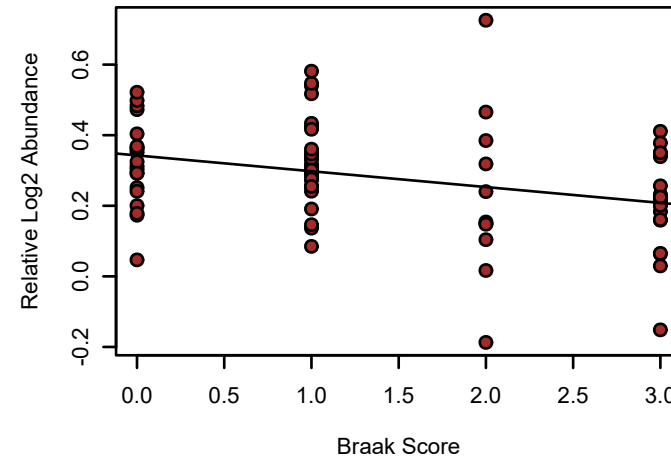

**bicor=-0.18, p=0.074**  
**cor=-0.2, p=0.046**

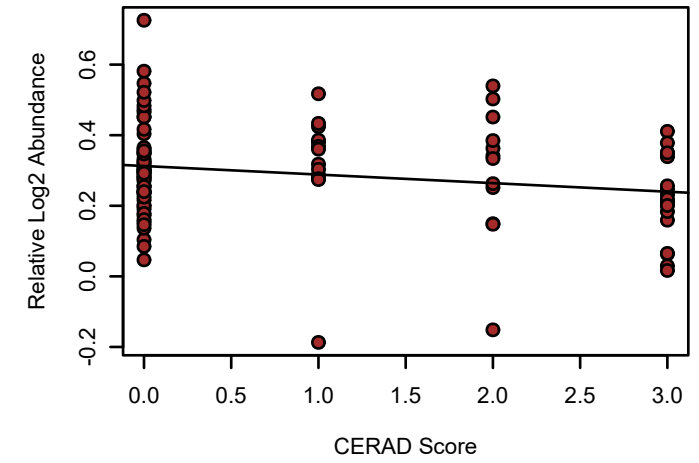

**TUBB3 UPenn Mixed PRM**  
NA grey MEGA module member  
K-W ANOVA p: 2.9e-05

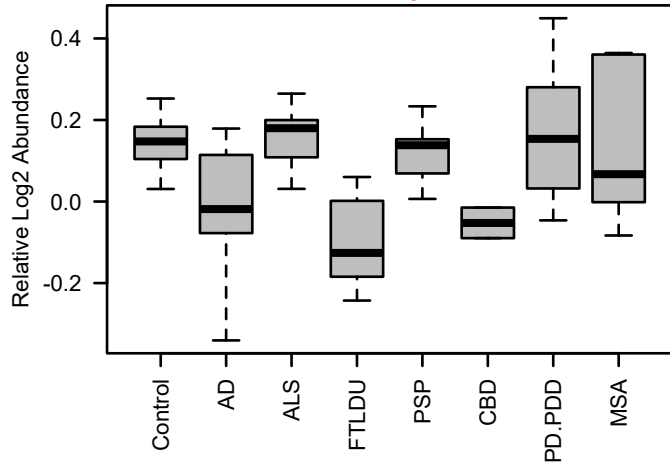

**TUBB3 UPenn Mixed PRM**  
K-W ANOVA p: 0.016

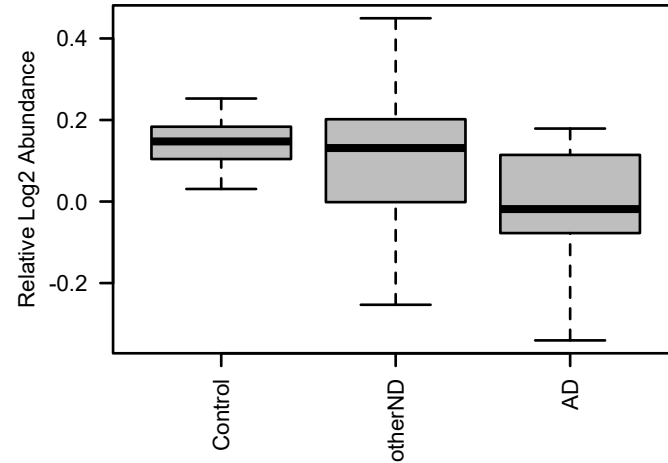

**bicor=-0.24, p=0.03**  
**cor=-0.2, p=0.068**

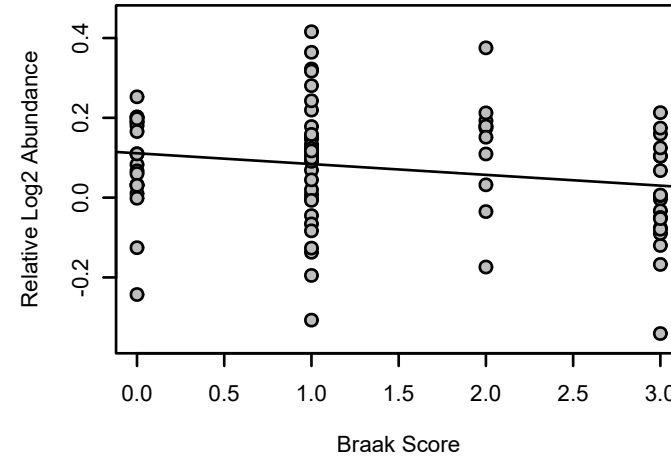

**bicor=-0.11, p=0.26**  
**cor=-0.13, p=0.2**

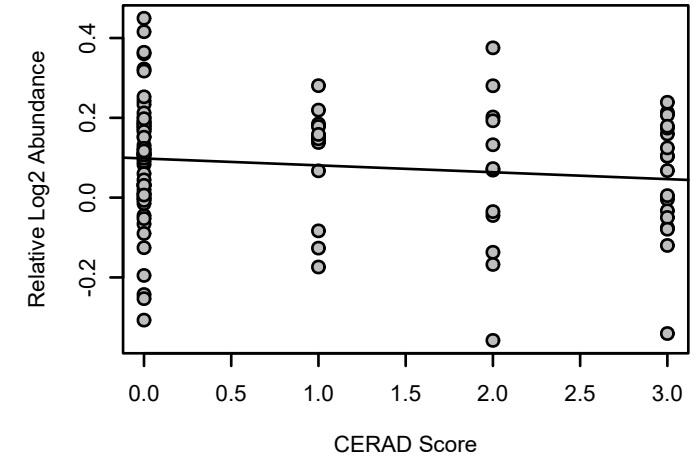

**CAMK2B UPenn Mixed PRM**  
**M1 turquoise MEGA module member**  
**K-W ANOVA p: 0.4**

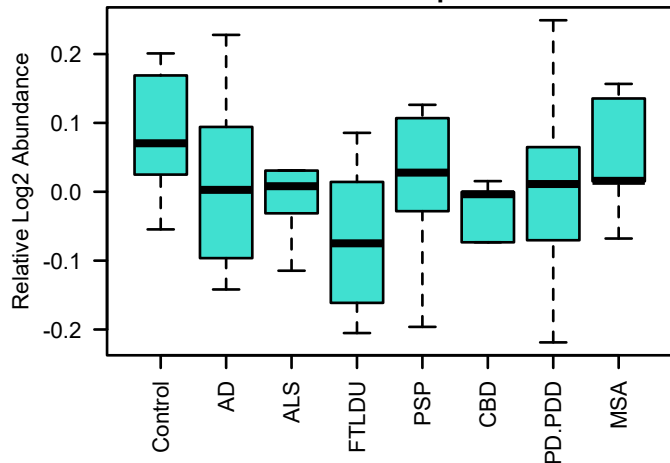

**CAMK2B UPenn Mixed PRM**  
**K-W ANOVA p: 0.18**

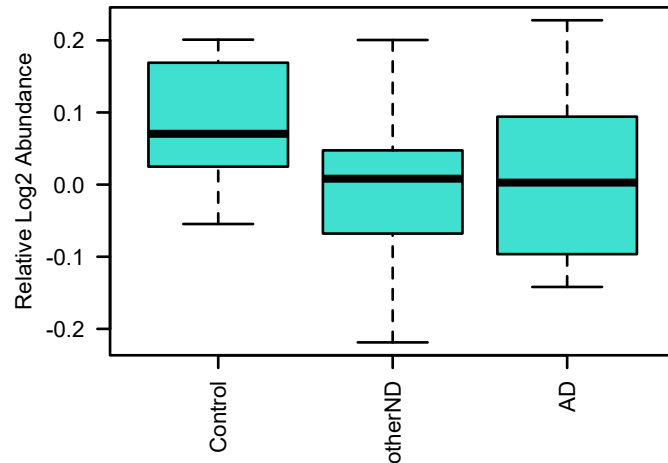

**bicor=-0.15, p=0.18**  
**cor=-0.14, p=0.2**

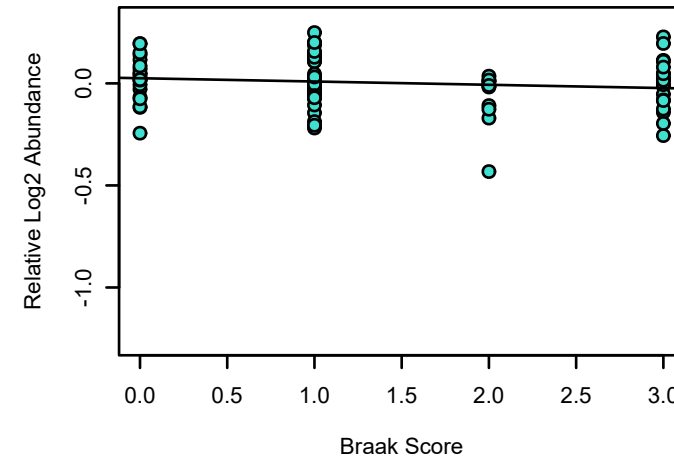

**bicor=0.0079, p=0.94**  
**cor=0.016, p=0.87**

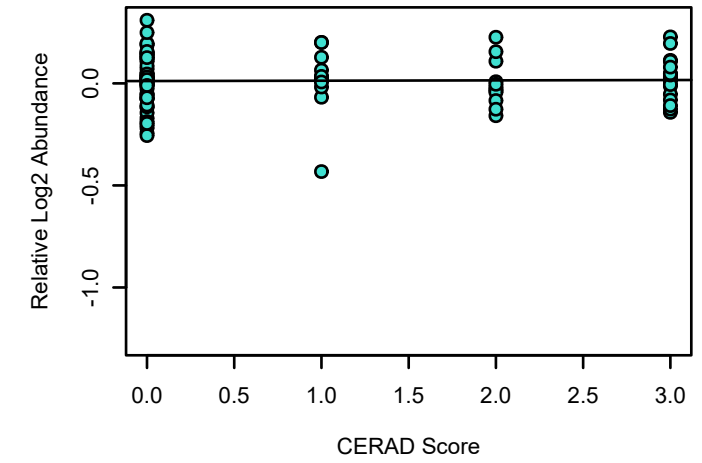

**DCTN2 UPenn Mixed PRM**  
**M2 blue MEGA module member**  
**K-W ANOVA p: 0.013**

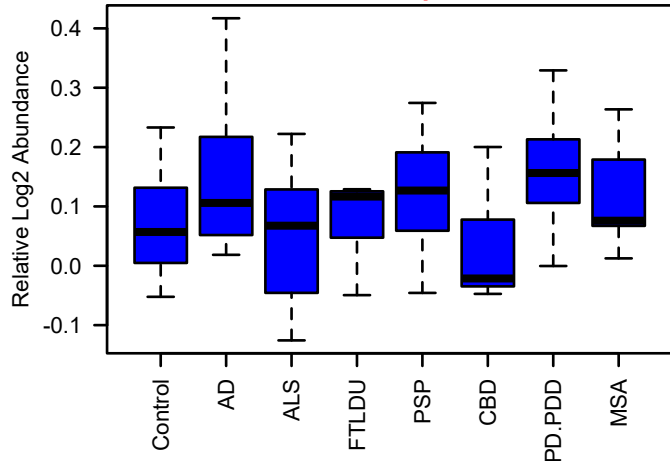

**DCTN2 UPenn Mixed PRM**  
**K-W ANOVA p: 0.13**

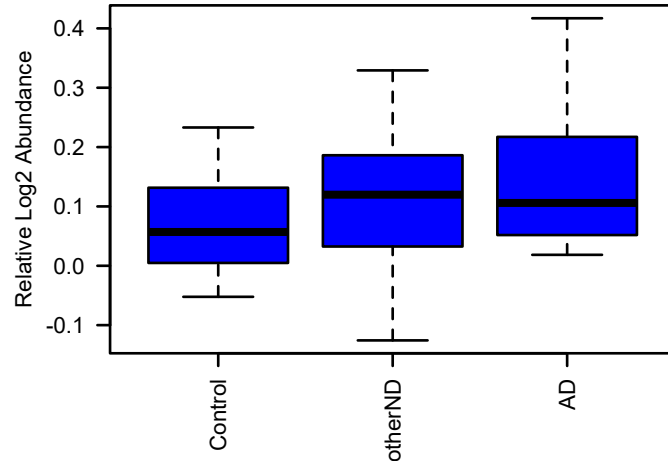

**bicor=0.22, p=0.04**  
**cor=0.25, p=0.022**

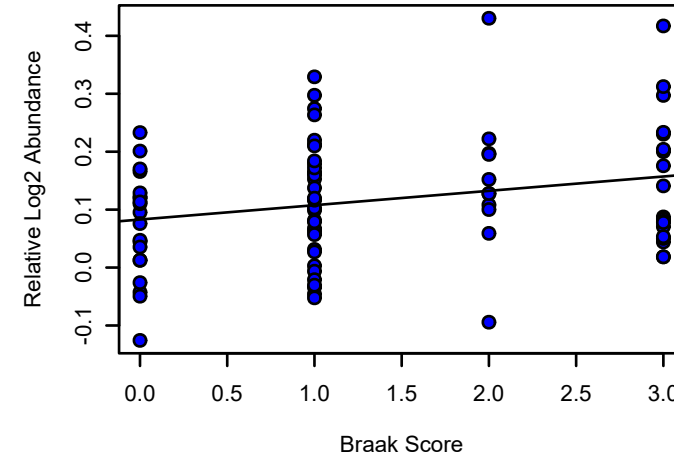

**bicor=0.17, p=0.082**  
**cor=0.19, p=0.058**

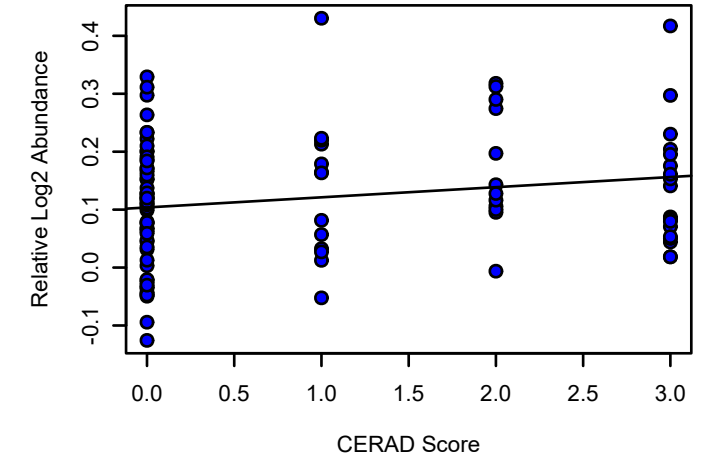

**AUH UPenn Mixed PRM**  
**M3 brown MEGA module member**  
**K-W ANOVA p: 0.3**

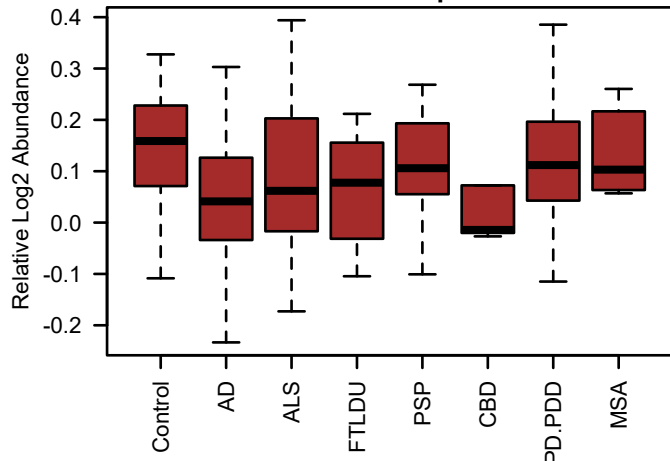

**AUH UPenn Mixed PRM**  
**K-W ANOVA p: 0.19**

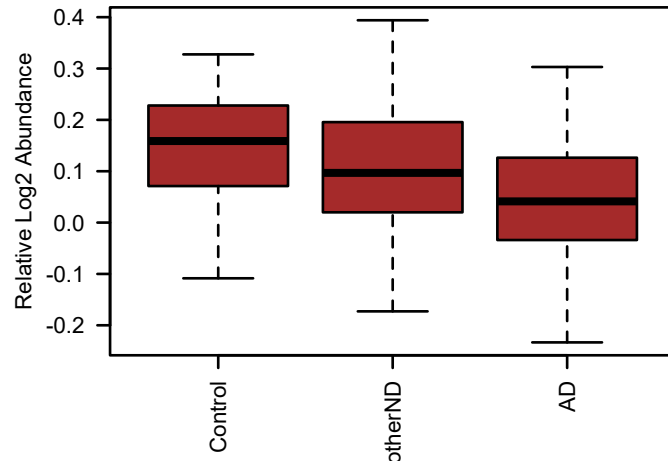

**bicor=-0.16, p=0.14**  
**cor=-0.18, p=0.1**

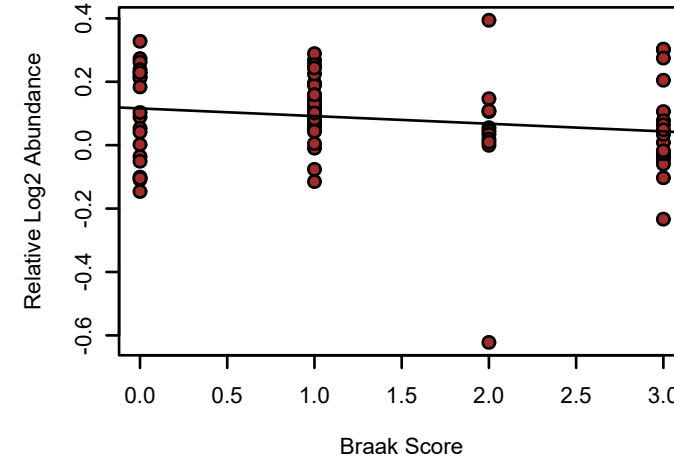

**bicor=-0.074, p=0.46**  
**cor=-0.067, p=0.51**

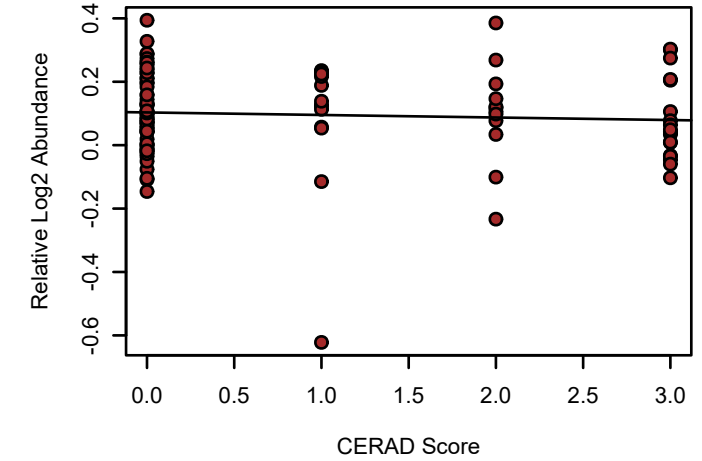

**SNTB1 UPenn Mixed PRM**  
**M4 yellow MEGA module member**  
**K-W ANOVA p: 0.00032**

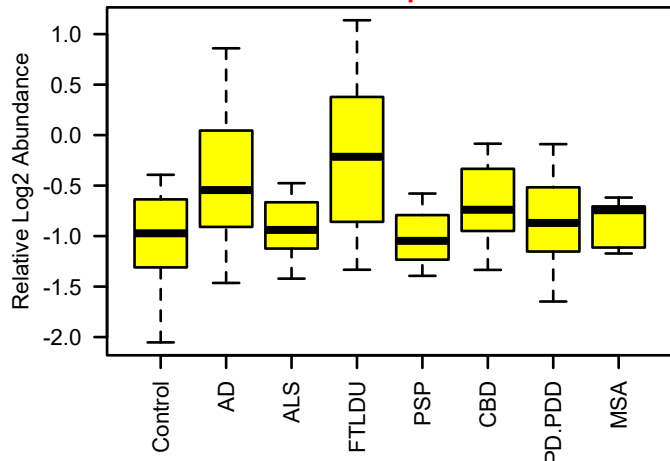

**SNTB1 UPenn Mixed PRM**  
**K-W ANOVA p: 0.0031**

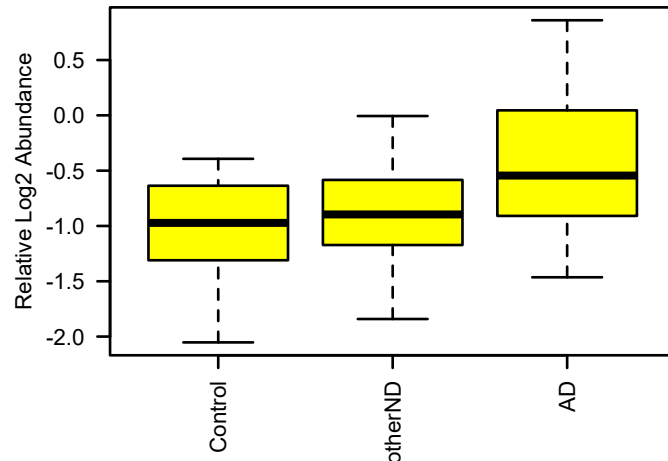

**bicor=0.18, p=0.094**  
**cor=0.23, p=0.035**

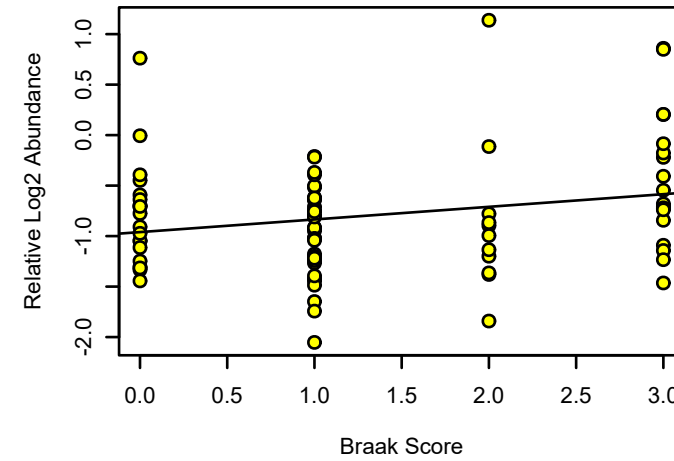

**bicor=0.31, p=0.002**  
**cor=0.3, p=0.0024**

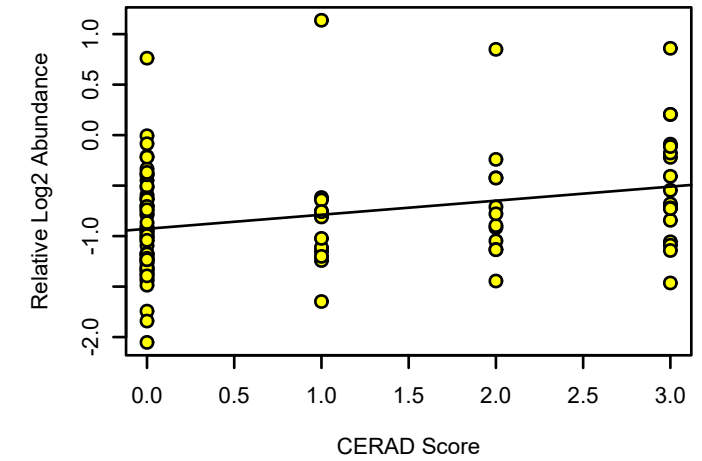

**CKAP5 UPenn Mixed PRM**  
NA grey MEGA module member  
K-W ANOVA p: 0.00023

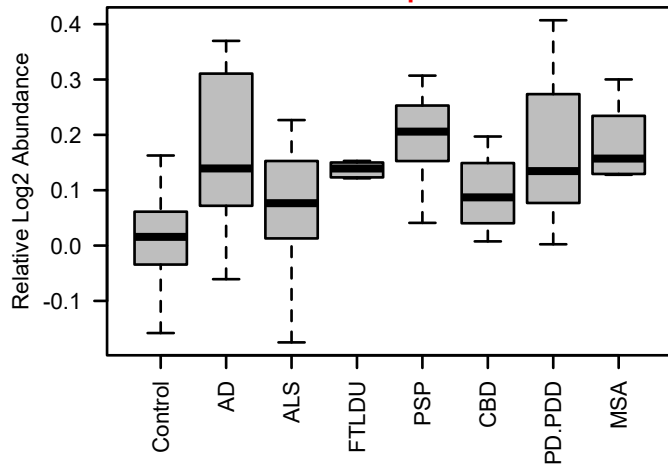

**CKAP5 UPenn Mixed PRM**  
K-W ANOVA p: 0.001

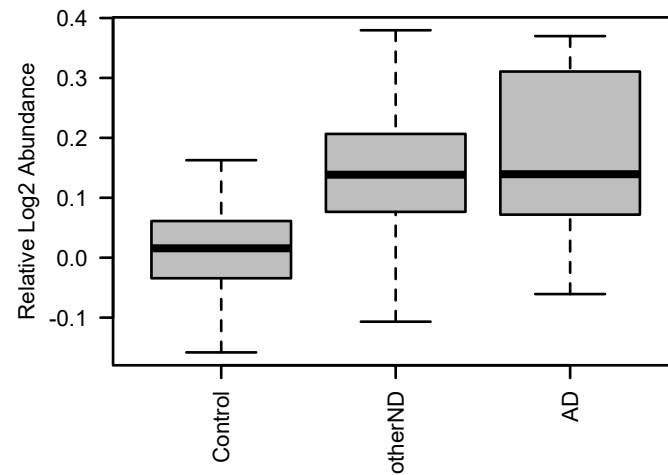

**bicor=0.17, p=0.12**  
**cor=0.19, p=0.083**

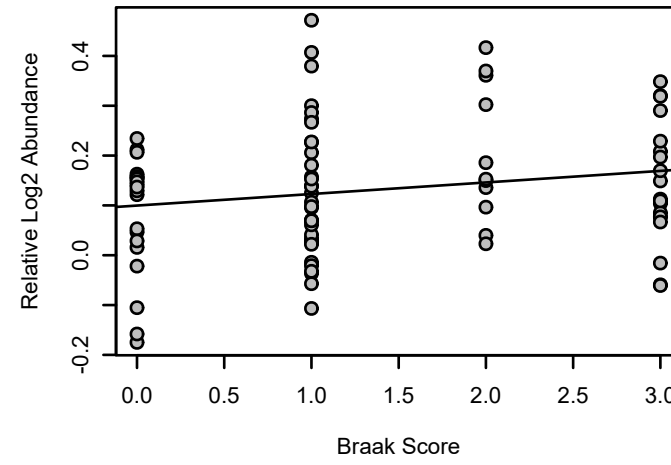

**bicor=0.13, p=0.2**  
**cor=0.14, p=0.16**

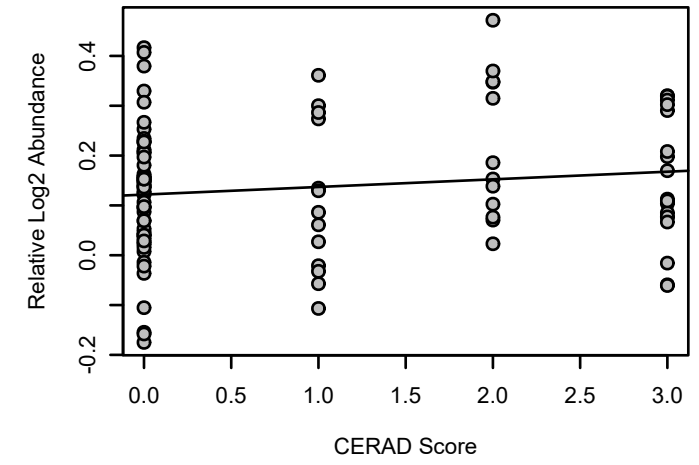

**DPYSL3 UPenn Mixed PRM**  
M4 yellow MEGA module member  
K-W ANOVA p: 0.02

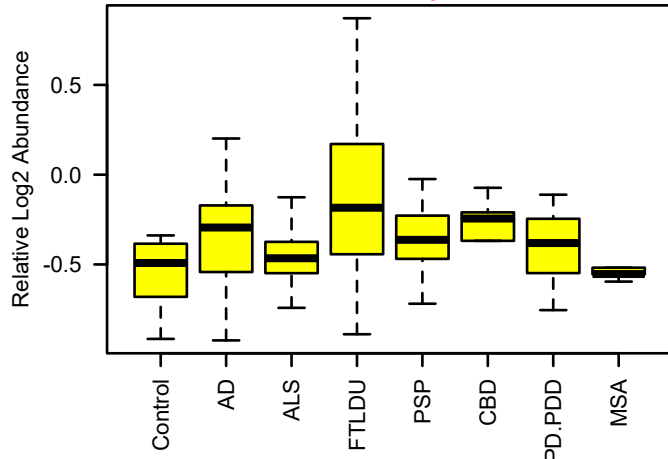

**DPYSL3 UPenn Mixed PRM**  
K-W ANOVA p: 0.059

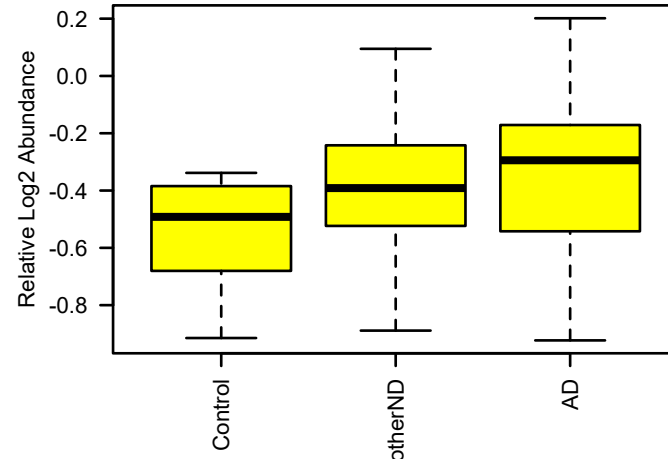

**bicor=0.2, p=0.073**  
**cor=0.22, p=0.044**

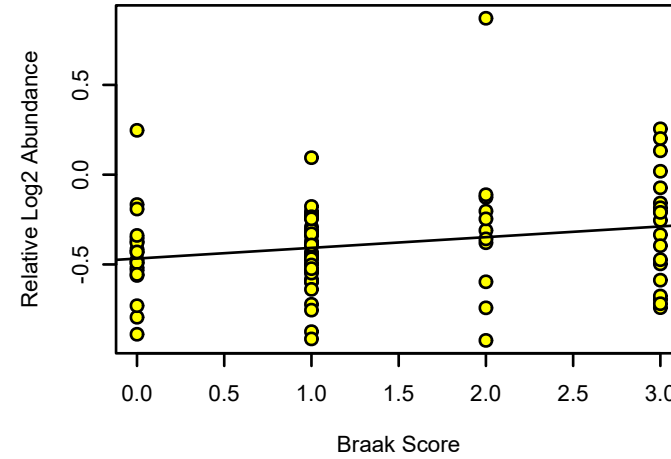

**bicor=0.24, p=0.015**  
**cor=0.22, p=0.028**

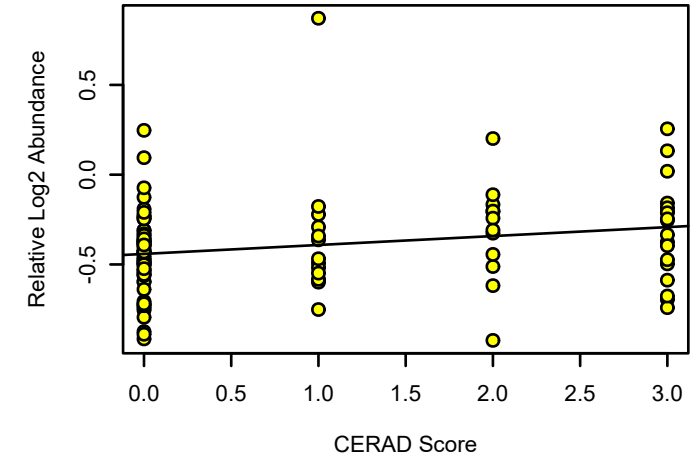

**DCTN1 UPenn Mixed PRM**  
M2 blue MEGA module member  
K-W ANOVA p: 0.051

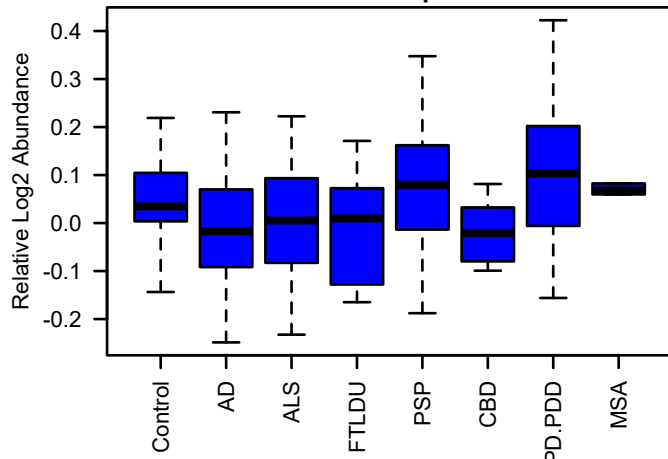

**DCTN1 UPenn Mixed PRM**  
K-W ANOVA p: 0.18

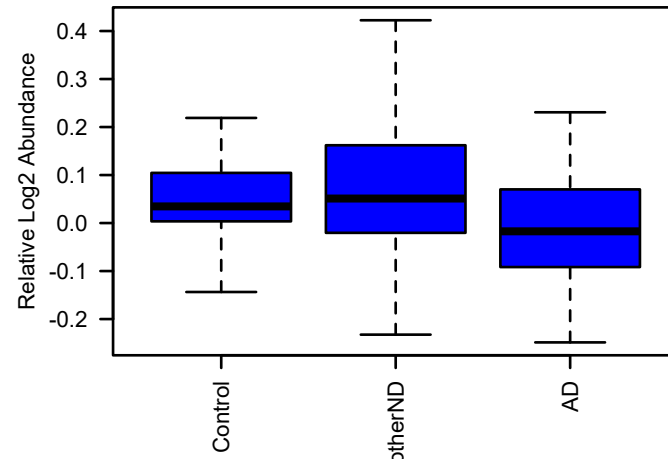

**bicor=-0.18, p=0.11**  
**cor=-0.21, p=0.055**

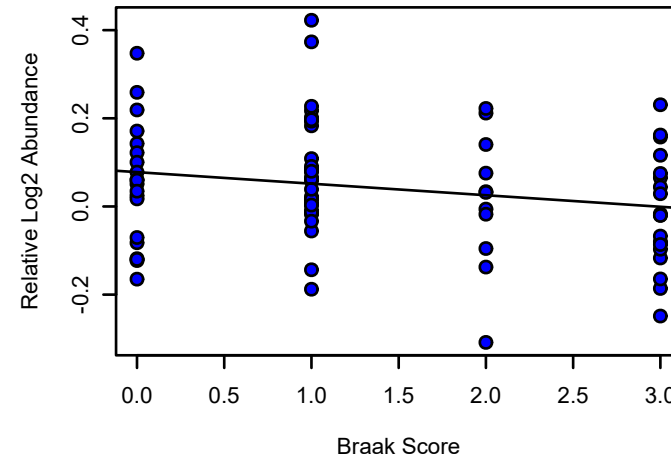

**bicor=-0.19, p=0.053**  
**cor=-0.18, p=0.073**

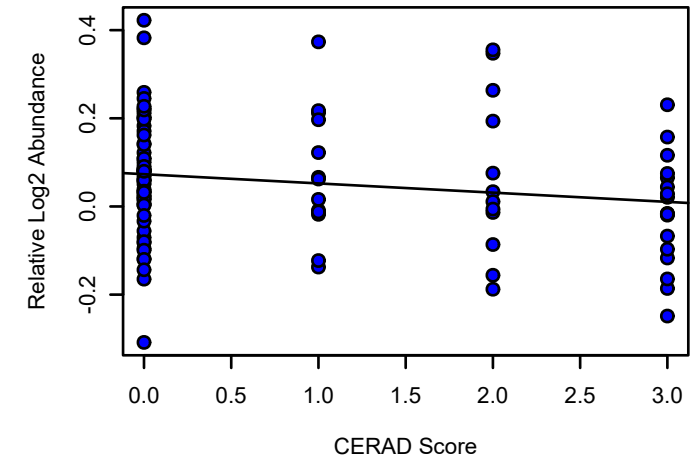

**PCDH18 UPenn Mixed PRM**  
NA grey20 MEGA module member  
K-W ANOVA p: 0.86

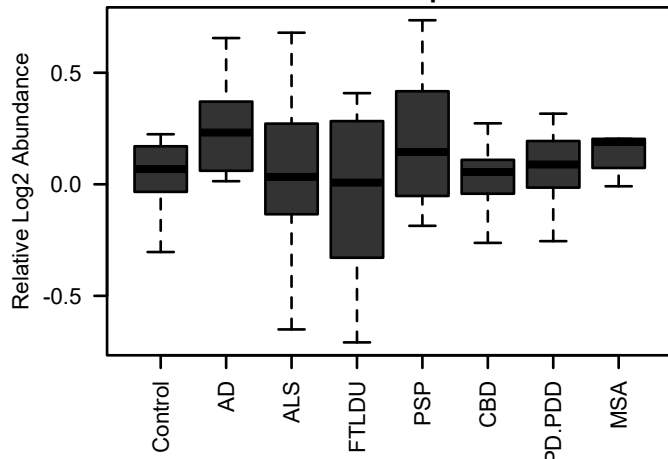

**PCDH18 UPenn Mixed PRM**  
K-W ANOVA p: 0.26

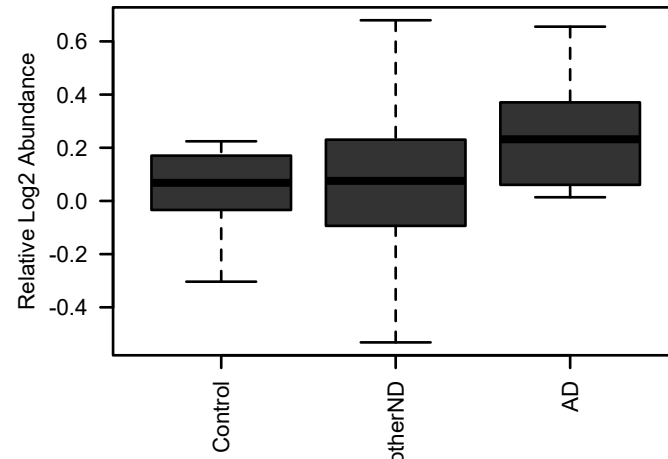

**bicor=0.28, p=0.0087**  
**cor=0.17, p=0.12**

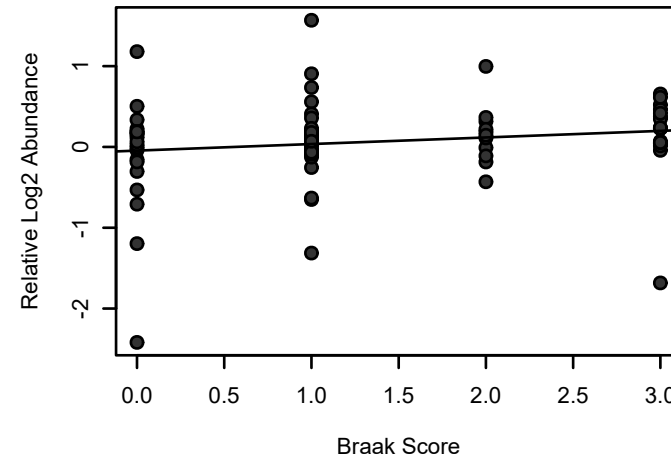

**bicor=0.21, p=0.035**  
**cor=-0.0049, p=0.96**

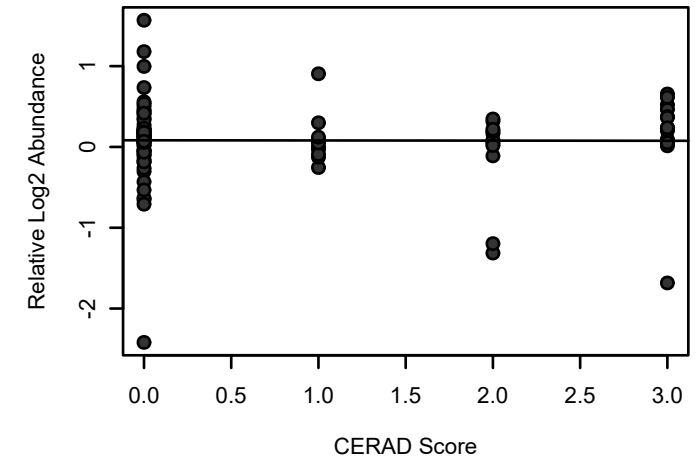

**DYNC1H1 UPenn Mixed PRM**  
**M2 blue MEGA module member**  
**K-W ANOVA p: 0.0035**

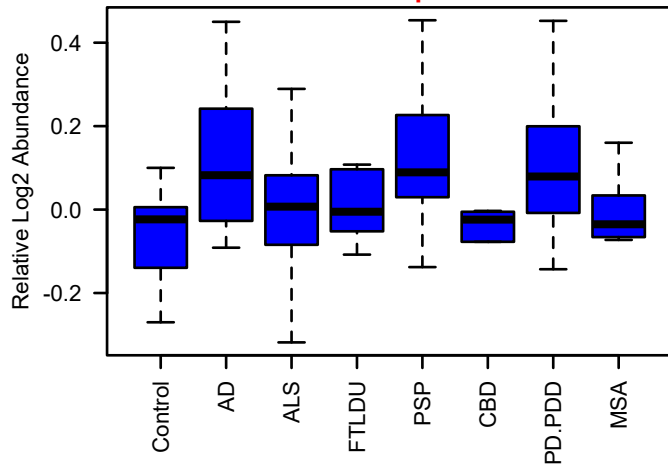

**DYNC1H1 UPenn Mixed PRM**  
**K-W ANOVA p: 0.009**

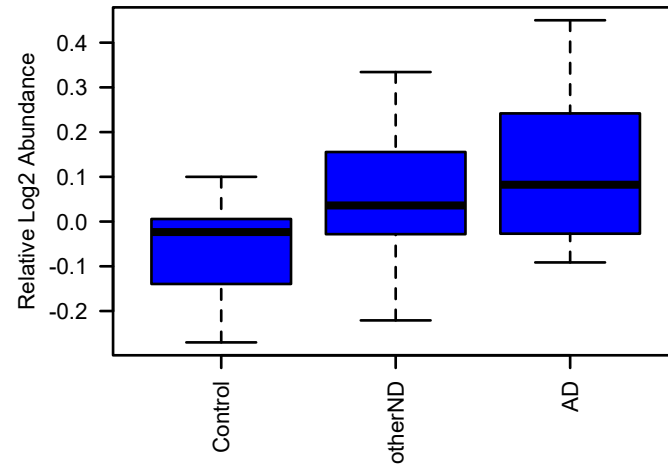

**bicor=0.27, p=0.012**  
**cor=0.27, p=0.013**

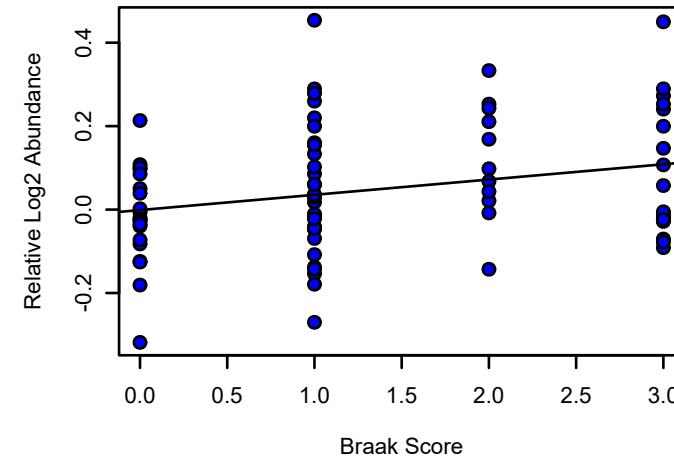

**bicor=0.15, p=0.13**  
**cor=0.19, p=0.058**

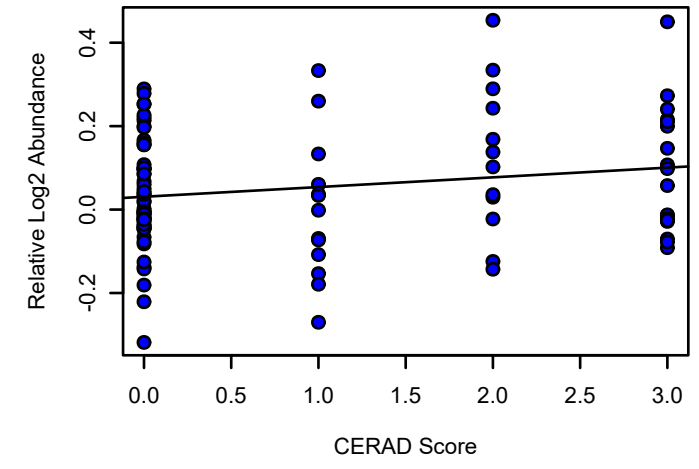

**GNA13 UPenn Mixed PRM**  
**M4 yellow MEGA module member**  
**K-W ANOVA p: 0.00013**

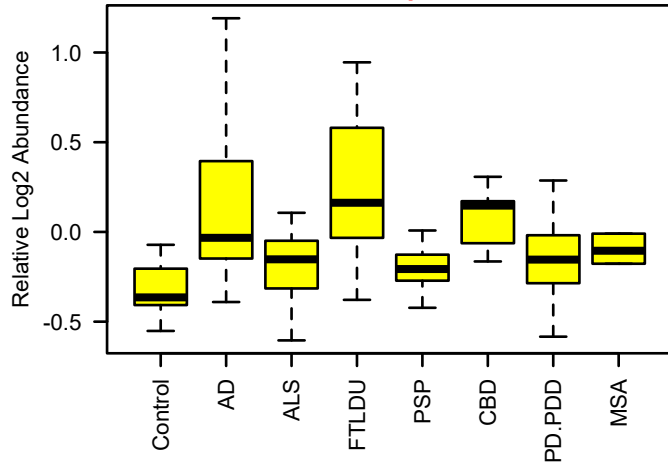

**GNA13 UPenn Mixed PRM**  
**K-W ANOVA p: 0.00052**

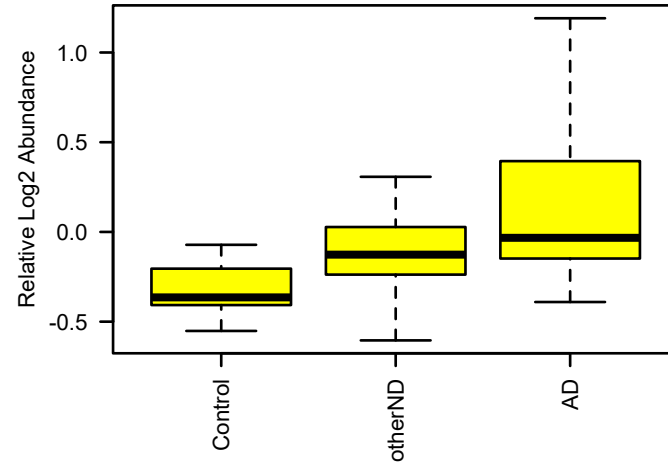

**bicor=0.33, p=0.0026**  
**cor=0.33, p=0.0022**

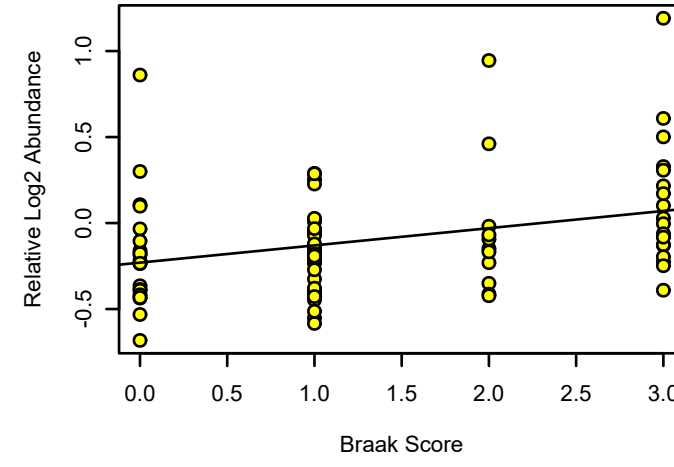

**bicor=0.23, p=0.019**  
**cor=0.26, p=0.009**

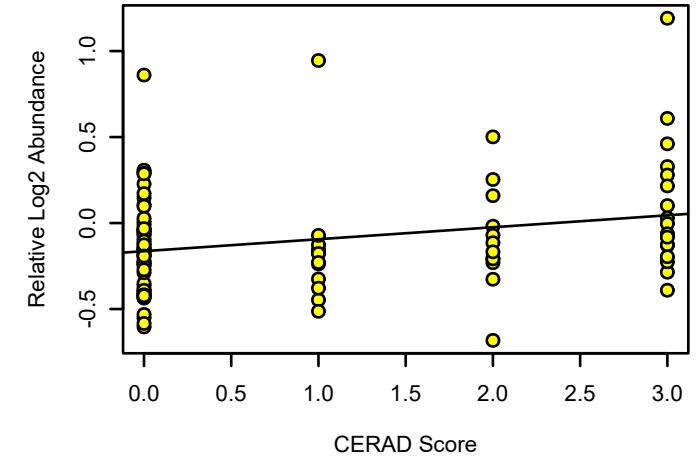

**PLEC UPenn Mixed PRM**  
**M4 yellow MEGA module member**  
**K-W ANOVA p: 2.7e-06**

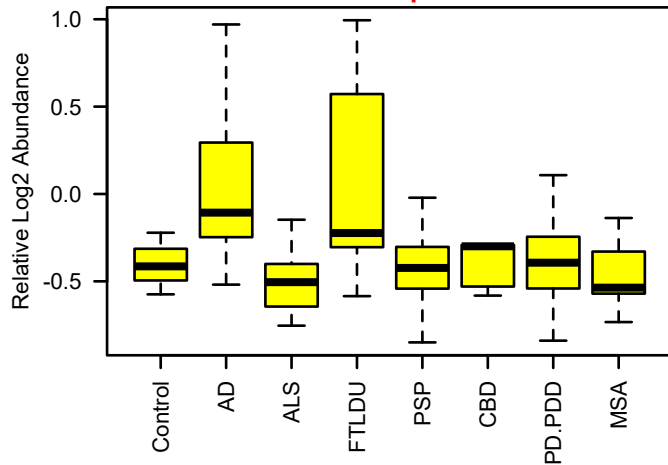

**PLEC UPenn Mixed PRM**  
**K-W ANOVA p: 2e-04**

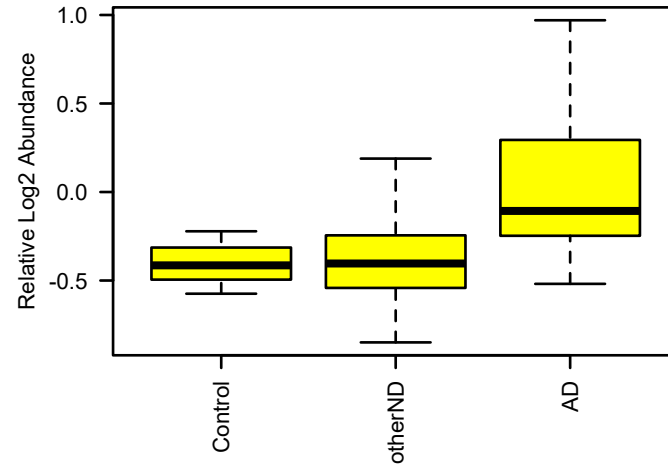

**bicor=0.35, p=0.00093**  
**cor=0.33, p=0.0022**

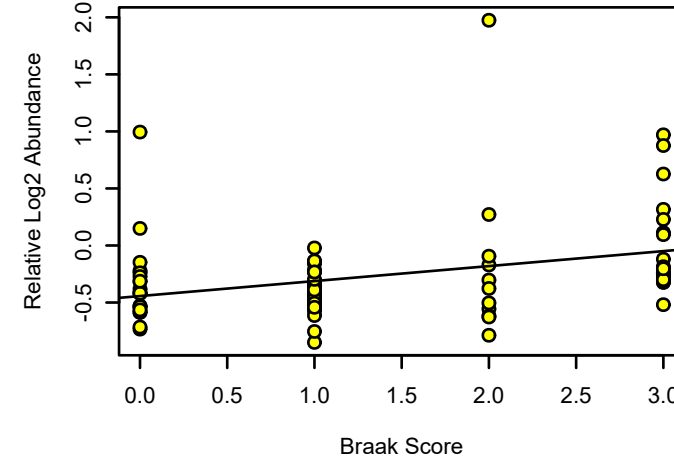

**bicor=0.36, p=0.00029**  
**cor=0.31, p=0.0017**

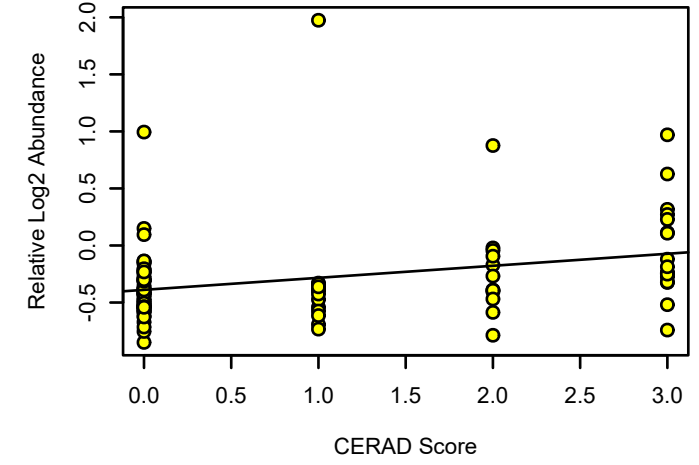

**NONO UPenn Mixed PRM**  
**M10 purple MEGA module member**  
**K-W ANOVA p: 0.0041**

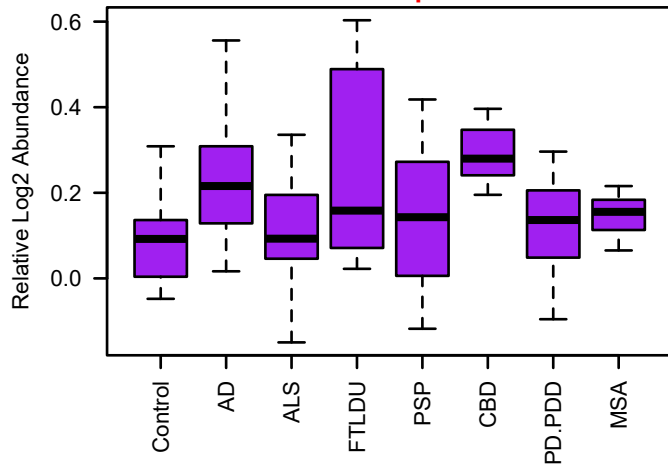

**NONO UPenn Mixed PRM**  
**K-W ANOVA p: 0.016**

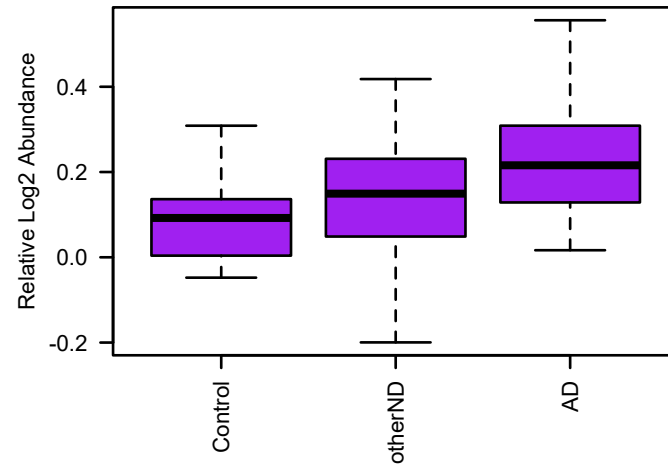

**bicor=0.31, p=0.0042**  
**cor=0.27, p=0.013**

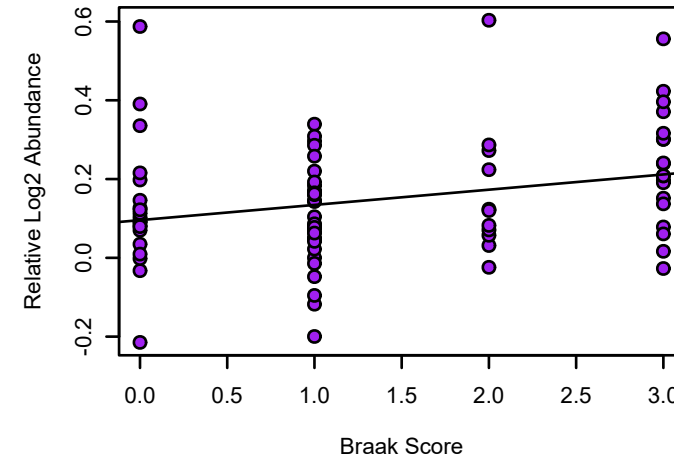

**bicor=0.13, p=0.19**  
**cor=0.13, p=0.2**

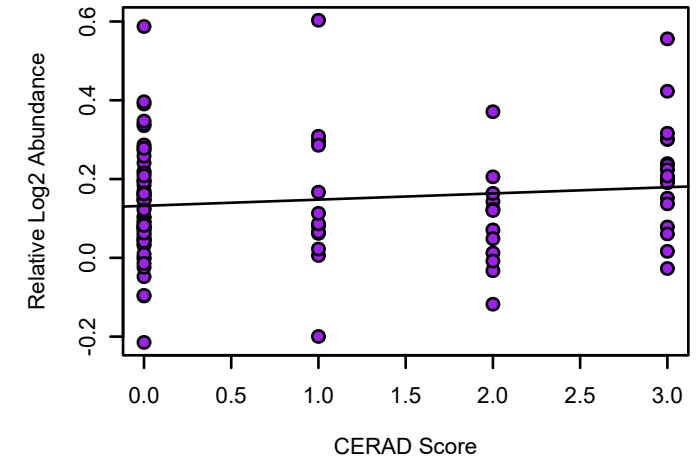



**PPP1R7 UPenn Mixed PRM**  
NA grey MEGA module member  
K-W ANOVA p: 0.21

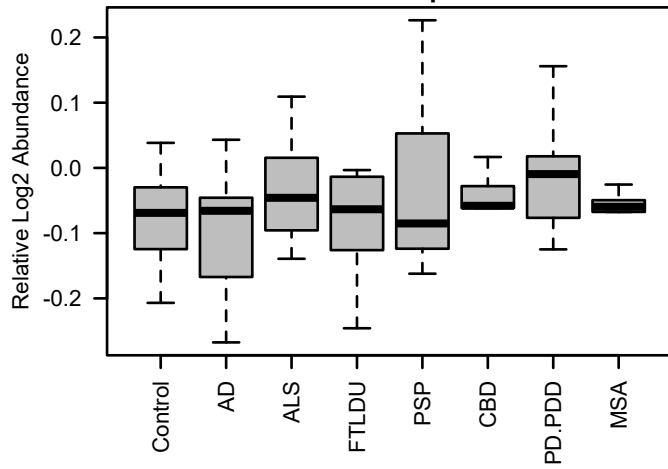

**PPP1R7 UPenn Mixed PRM**  
K-W ANOVA p: 0.024

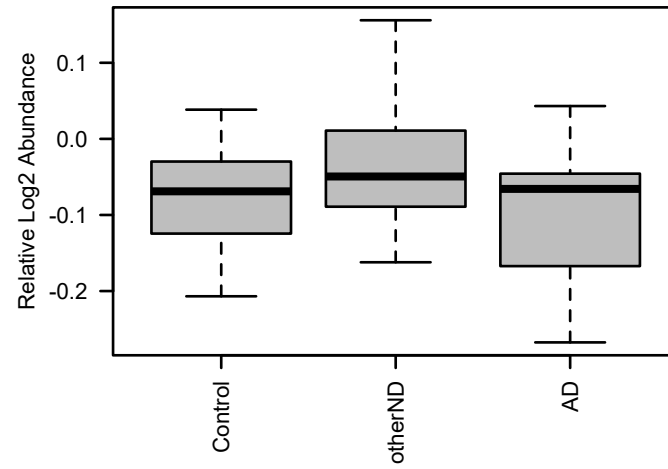

**bicor=-0.039, p=0.72**  
**cor=-0.013, p=0.91**

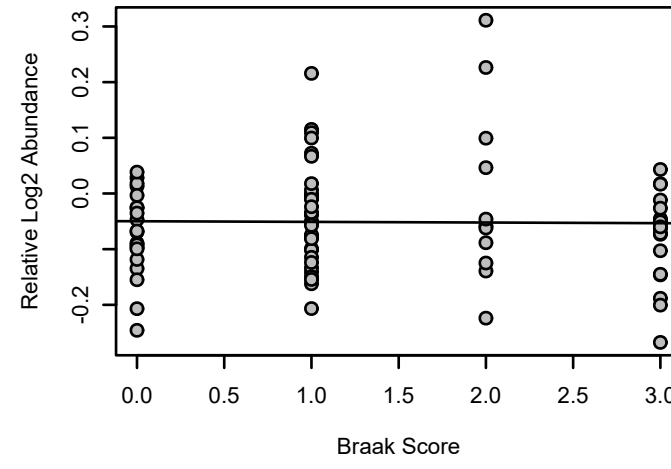

**bicor=-0.12, p=0.22**  
**cor=-0.12, p=0.23**

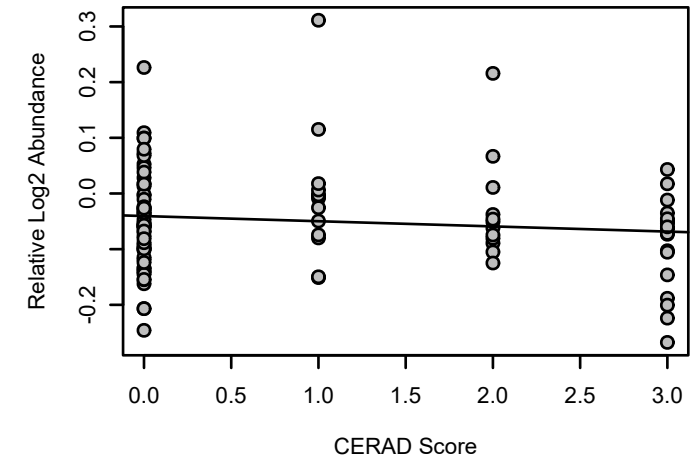

**ADIRF UPenn Mixed PRM**  
M4 yellow MEGA module member  
K-W ANOVA p: 0.0041

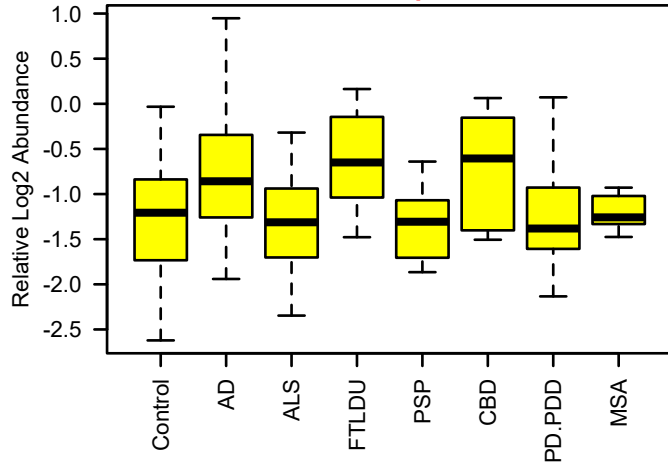

**ADIRF UPenn Mixed PRM**  
K-W ANOVA p: 0.031

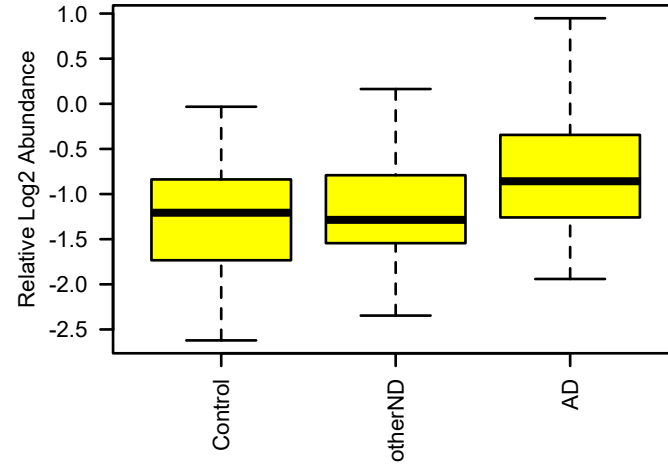

**bicor=0.23, p=0.035**  
**cor=0.26, p=0.017**

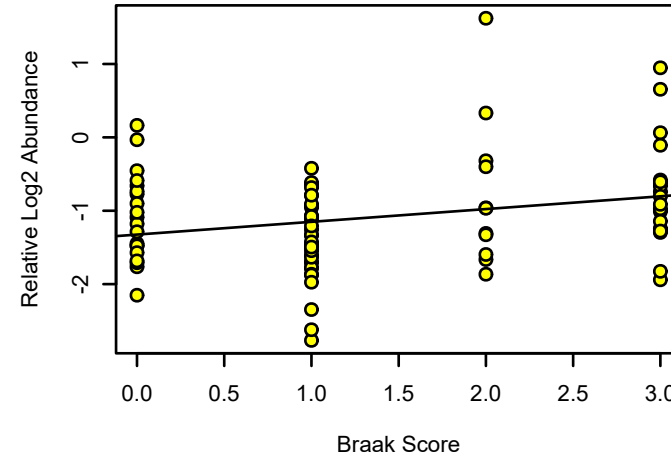

**bicor=0.27, p=0.0076**  
**cor=0.26, p=0.009**

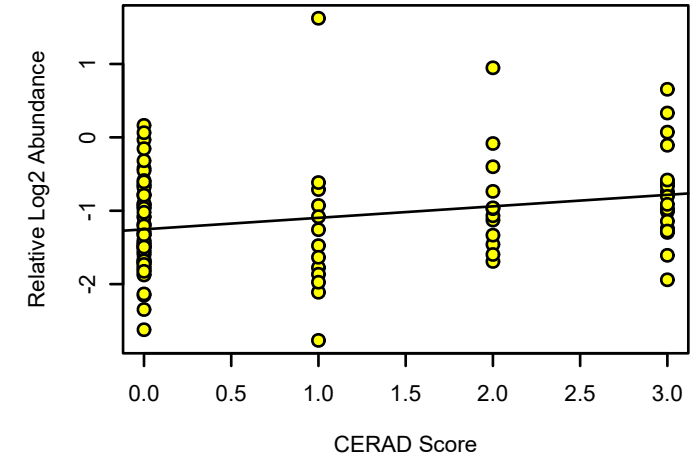

**STX1A UPenn Mixed PRM**  
M1 turquoise MEGA module member  
K-W ANOVA p: 2.2e-05

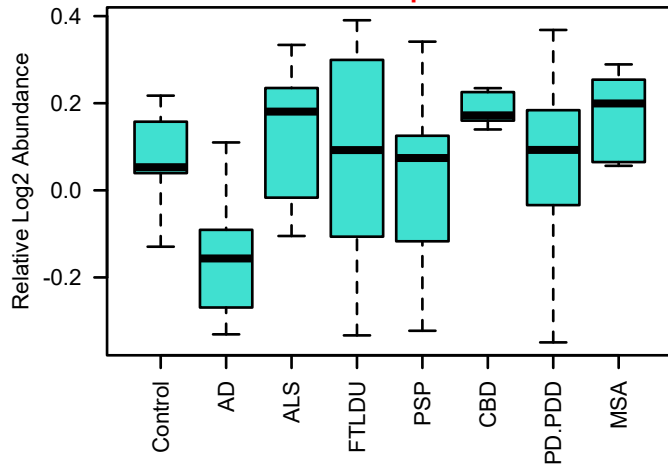

**STX1A UPenn Mixed PRM**  
K-W ANOVA p: 4.3e-07

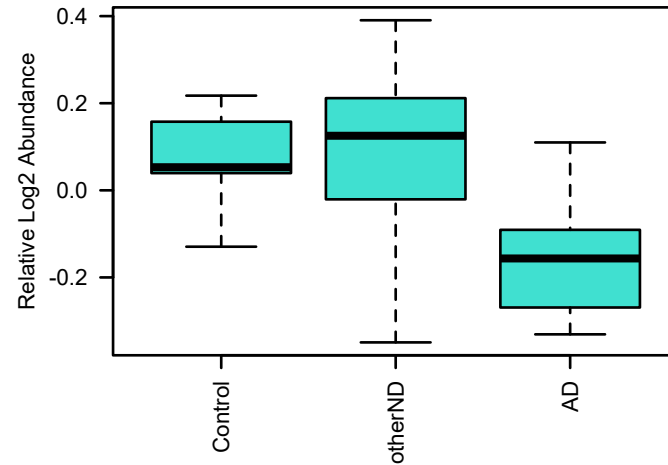

**bicor=-0.41, p=0.00013**  
**cor=-0.4, p=0.00016**

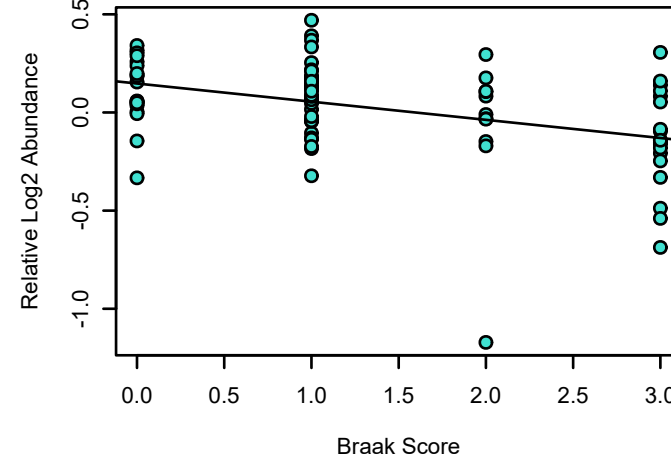

**bicor=-0.38, p=9.4e-05**  
**cor=-0.41, p=2.3e-05**

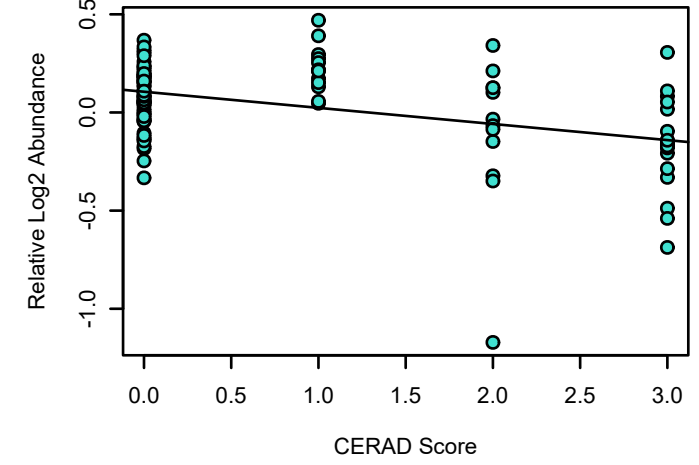

**NDUFA9 UPenn Mixed PRM**  
M3 brown MEGA module member  
K-W ANOVA p: 0.0019

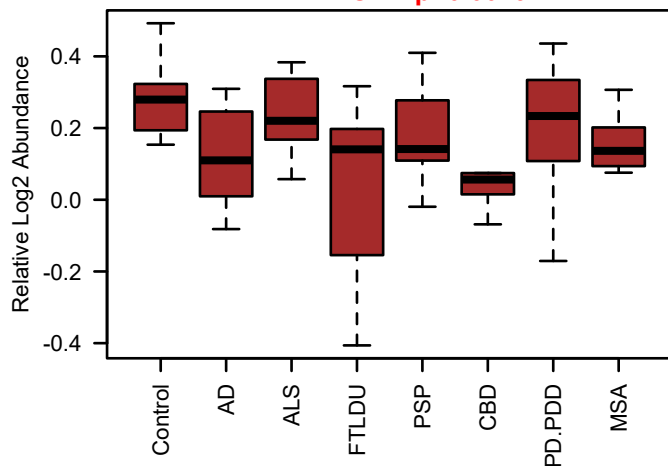

**NDUFA9 UPenn Mixed PRM**  
K-W ANOVA p: 0.013

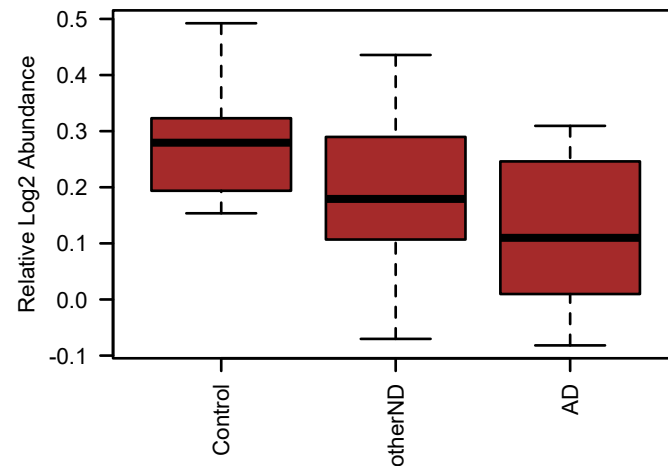

**bicor=-0.26, p=0.018**  
**cor=-0.25, p=0.022**

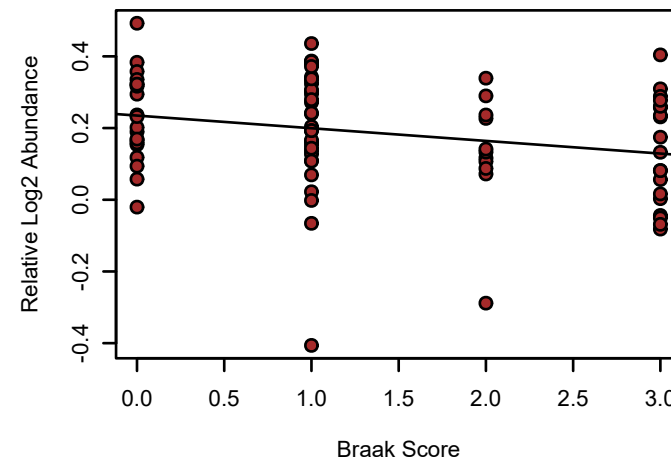

**bicor=-0.19, p=0.059**  
**cor=-0.18, p=0.073**

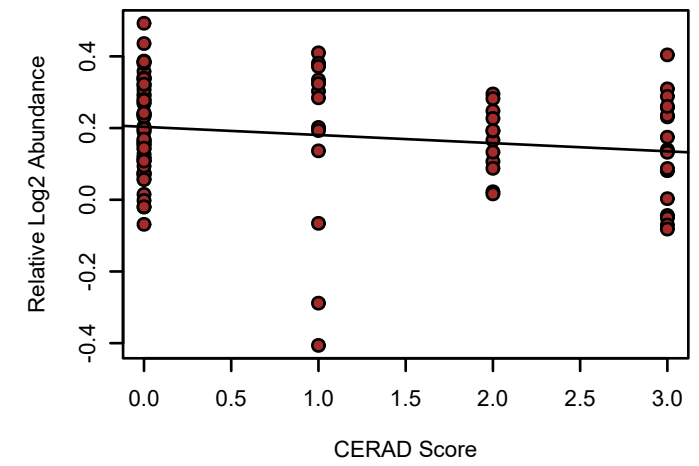

**RTN1 UPenn Mixed PRM**  
**M6 red MEGA module member**  
**K-W ANOVA p: 0.0039**

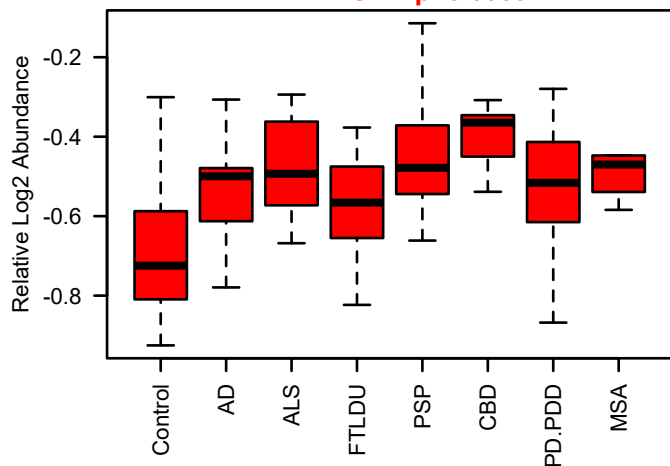

**RTN1 UPenn Mixed PRM**  
**K-W ANOVA p: 0.00056**

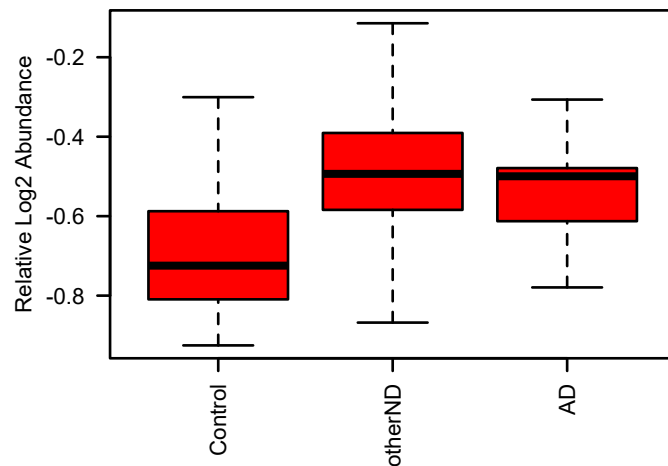

**bicor=0.021, p=0.85**  
**cor=0.036, p=0.75**

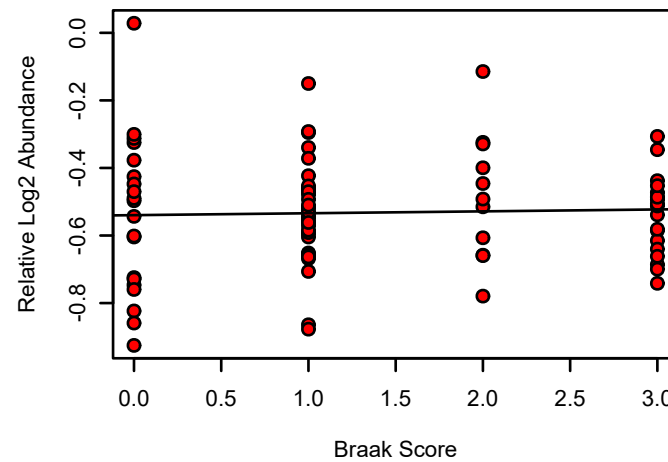

**bicor=-0.011, p=0.91**  
**cor=-0.021, p=0.84**

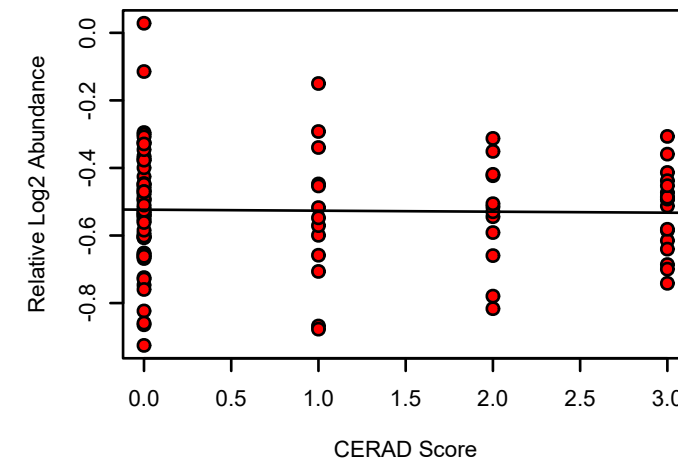

**IMMT UPenn Mixed PRM**  
**M3 brown MEGA module member**  
**K-W ANOVA p: 0.029**

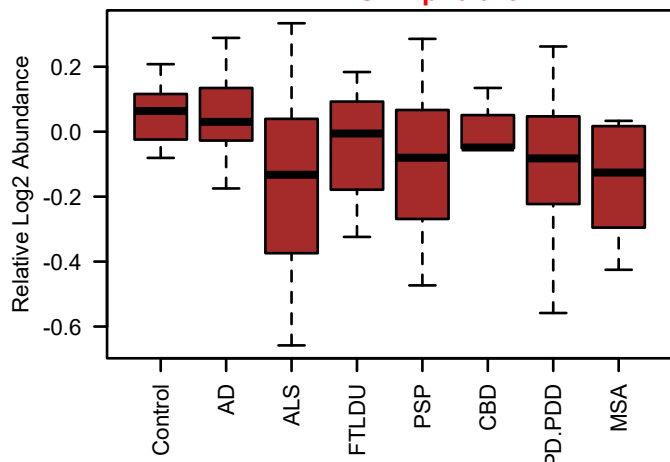

**IMMT UPenn Mixed PRM**  
**K-W ANOVA p: 0.0015**

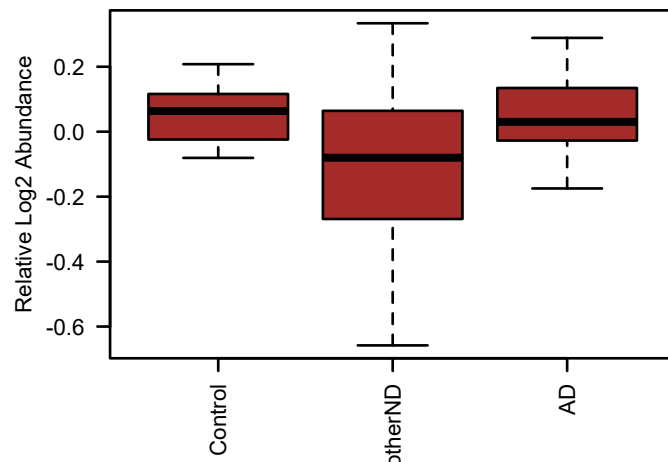

**bicor=0.032, p=0.77**  
**cor=0.083, p=0.45**

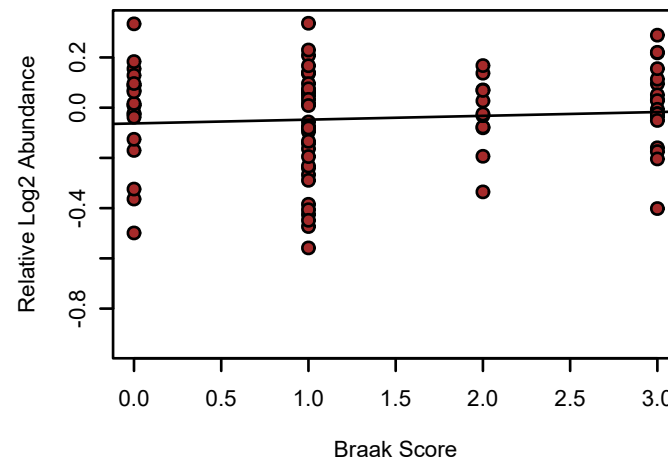

**bicor=0.15, p=0.15**  
**cor=0.14, p=0.16**

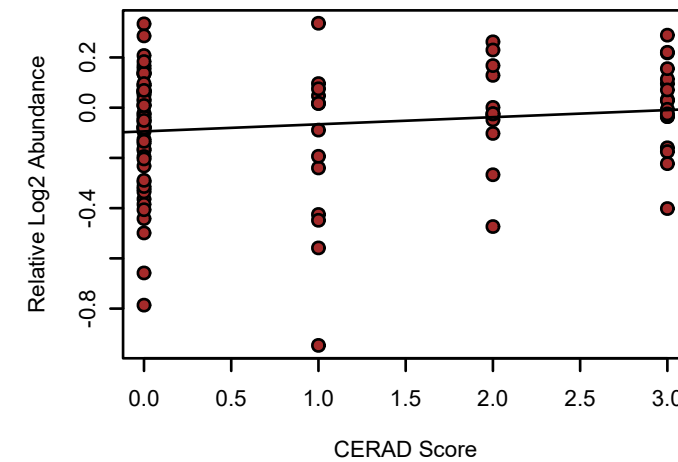

**INF2 UPenn Mixed PRM**  
**M2 blue MEGA module member**  
**K-W ANOVA p: 0.29**

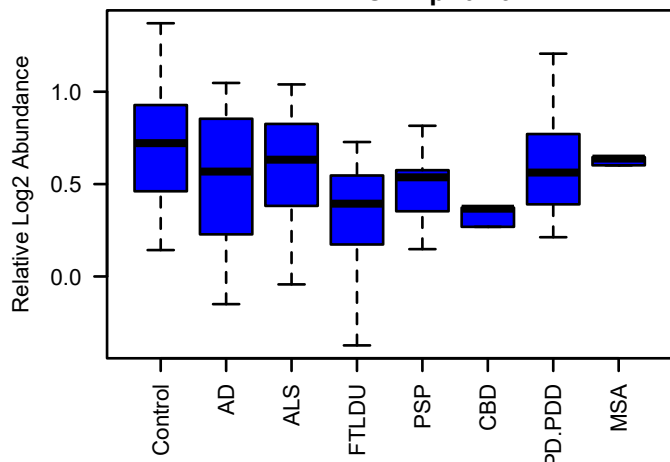

**INF2 UPenn Mixed PRM**  
**K-W ANOVA p: 0.35**

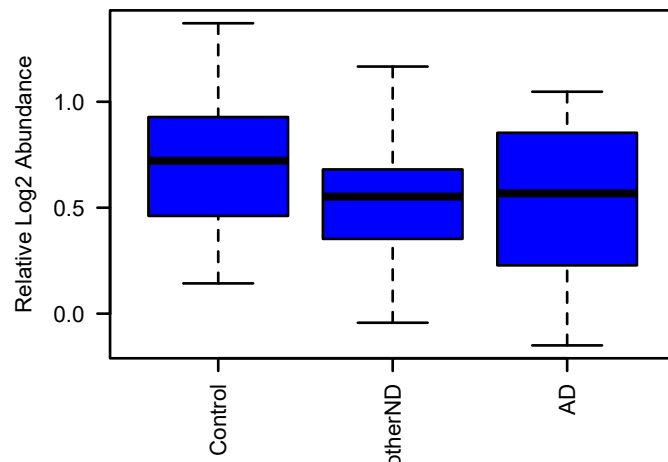

**bicor=-0.087, p=0.43**  
**cor=-0.083, p=0.45**

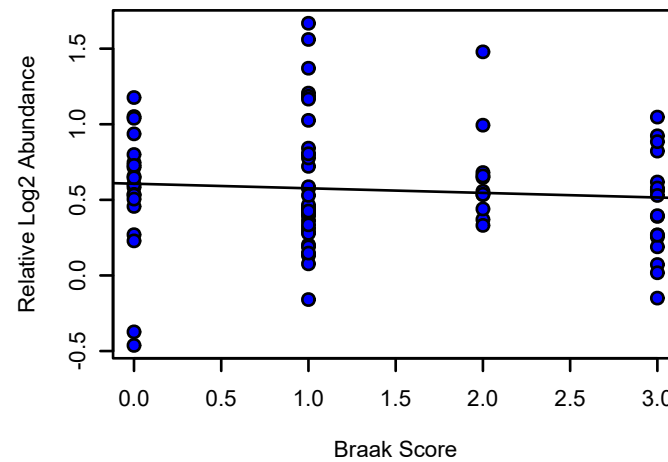

**bicor=-0.093, p=0.36**  
**cor=-0.087, p=0.39**

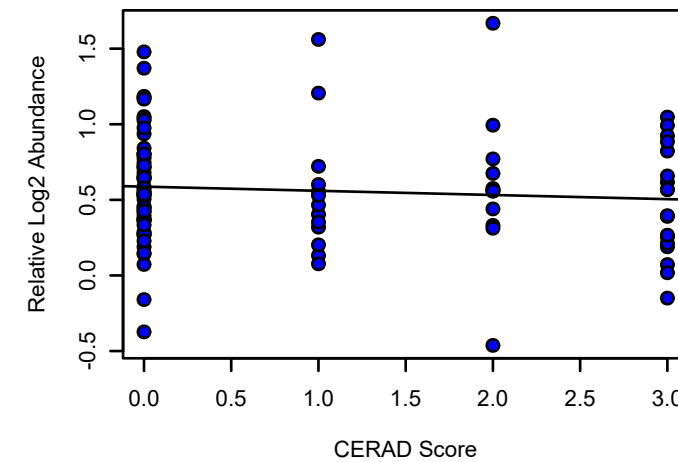

**AAK1 UPenn Mixed PRM**  
**M6 red MEGA module member**  
**K-W ANOVA p: 0.037**

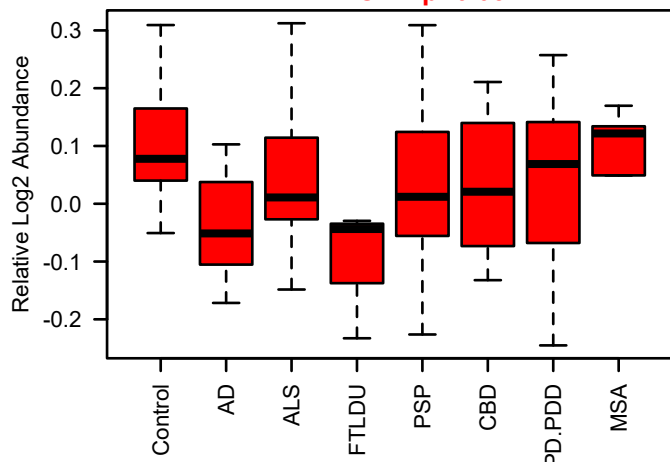

**AAK1 UPenn Mixed PRM**  
**K-W ANOVA p: 0.019**

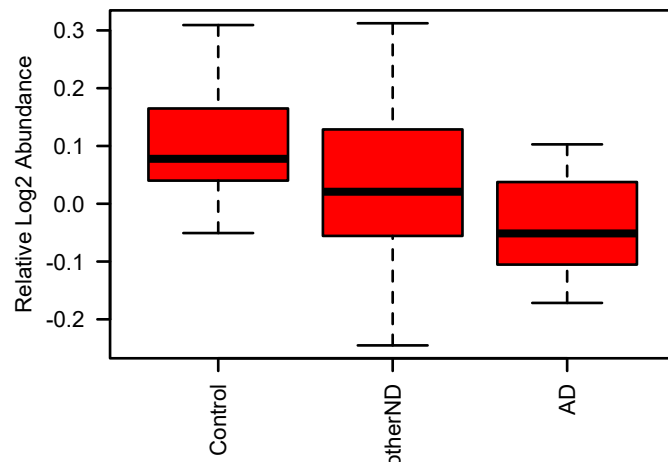

**bicor=-0.26, p=0.016**  
**cor=-0.25, p=0.022**

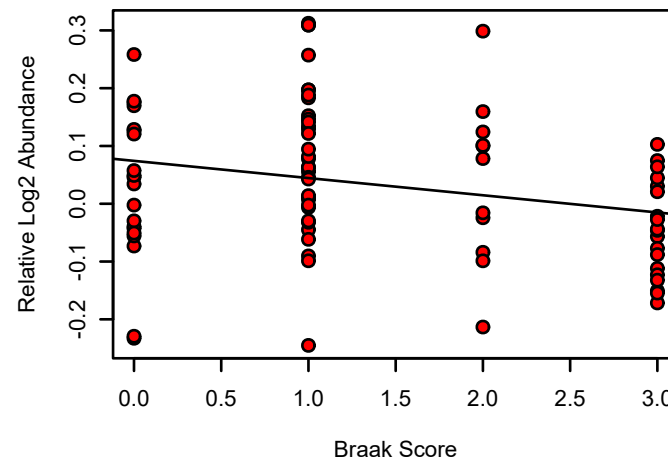

**bicor=-0.22, p=0.029**  
**cor=-0.21, p=0.036**

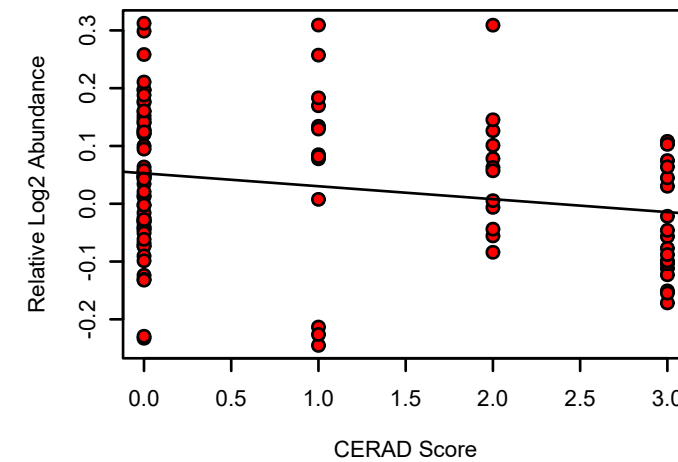

**PREPL UPenn Mixed PRM**  
NA grey MEGA module member  
K-W ANOVA p: 0.00062

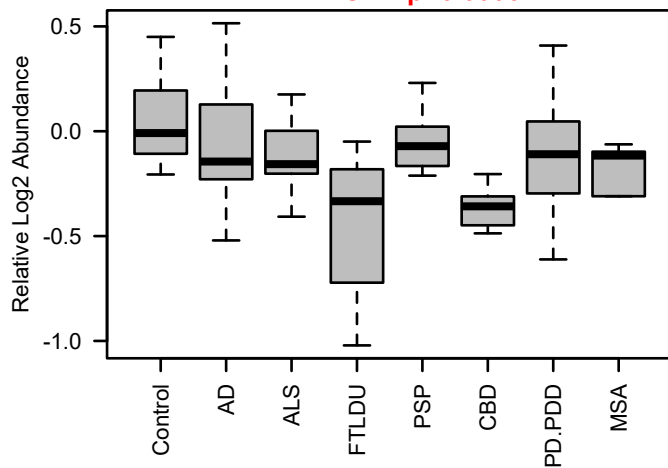

**PREPL UPenn Mixed PRM**  
K-W ANOVA p: 0.0089

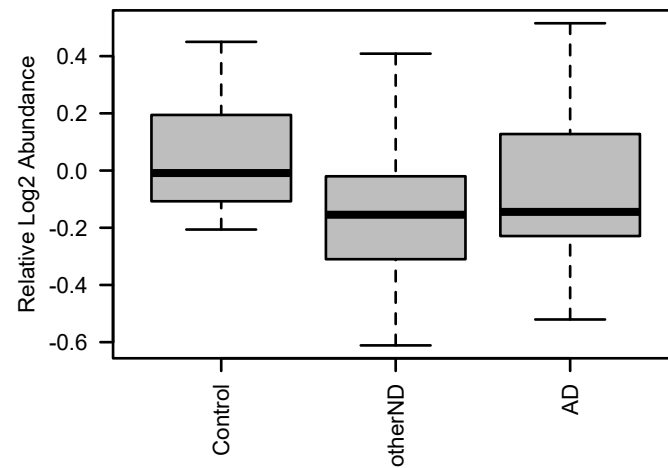

**bicor=-0.015, p=0.89**  
**cor=-0.026, p=0.81**

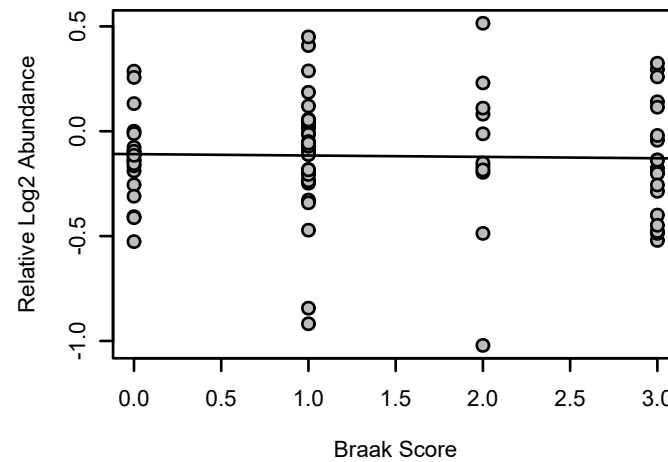

**bicor=0.016, p=0.87**  
**cor=0.017, p=0.87**

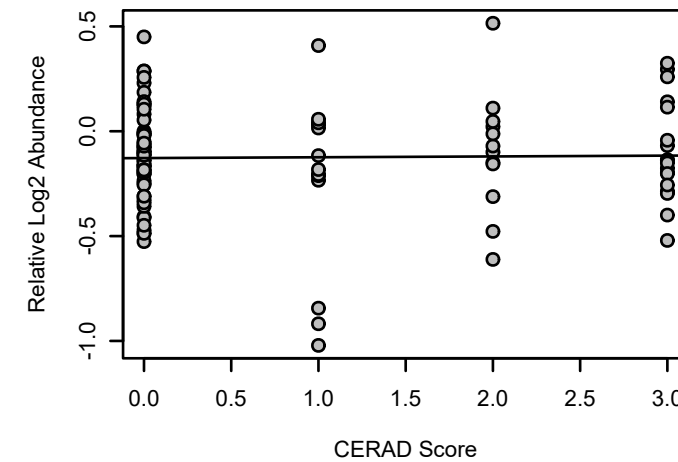

**FHL1 UPenn Mixed PRM**  
M4 yellow MEGA module member  
K-W ANOVA p: 6.9e-07

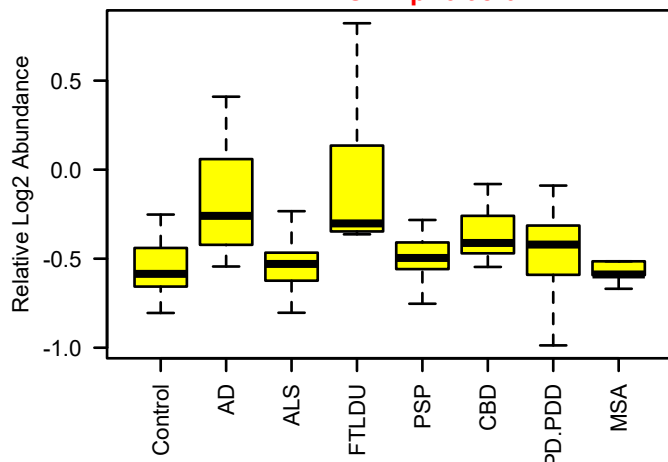

**FHL1 UPenn Mixed PRM**  
K-W ANOVA p: 0.00011

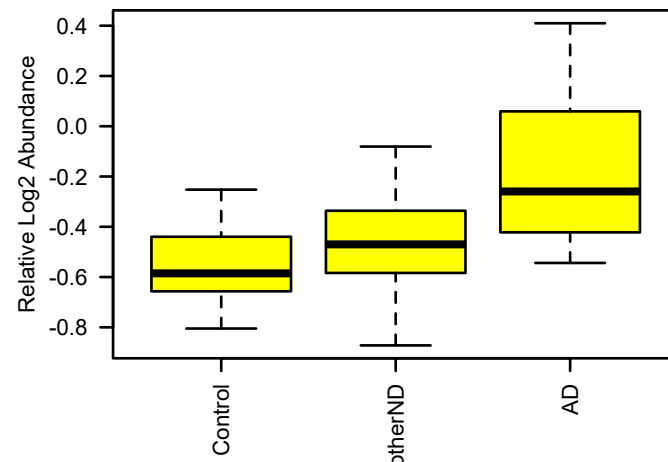

**bicor=0.39, p=2e-04**  
**cor=0.35, p=0.0011**

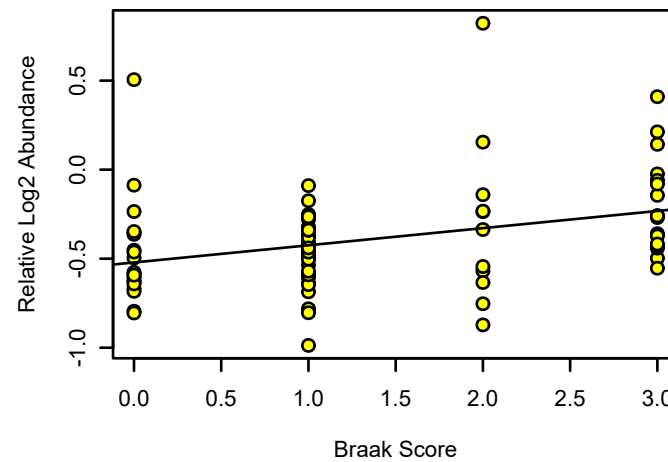

**bicor=0.4, p=4.4e-05**  
**cor=0.34, p=0.00054**

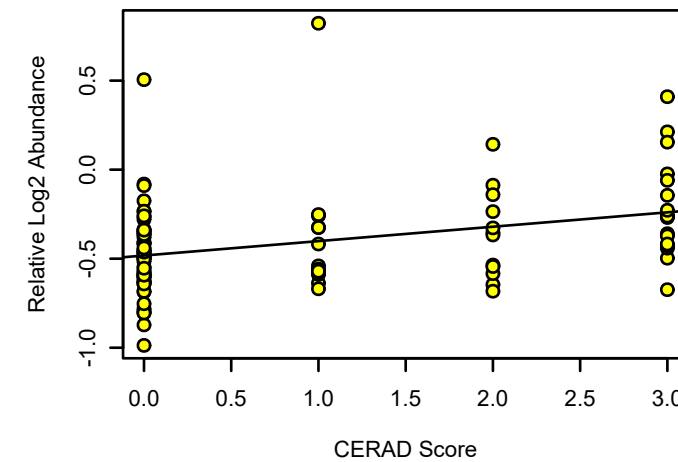

**HMGB1 UPenn Mixed PRM**  
M10 purple MEGA module member  
K-W ANOVA p: 0.18

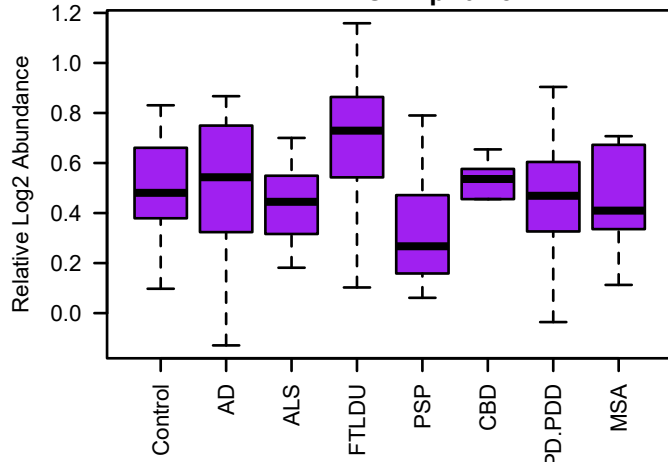

**HMGB1 UPenn Mixed PRM**  
K-W ANOVA p: 0.28

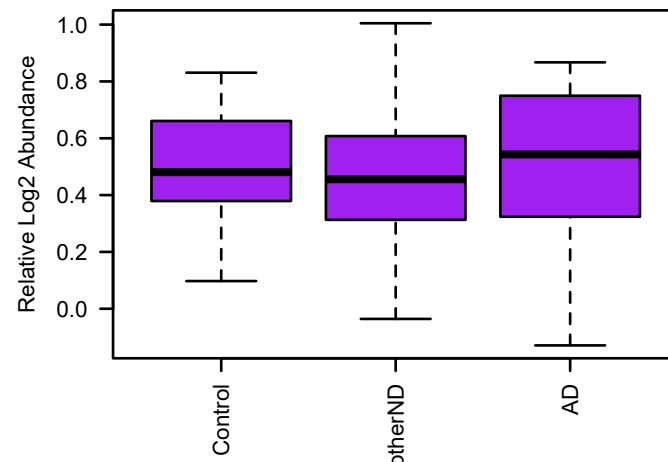

**bicor=0.025, p=0.82**  
**cor=0.13, p=0.24**

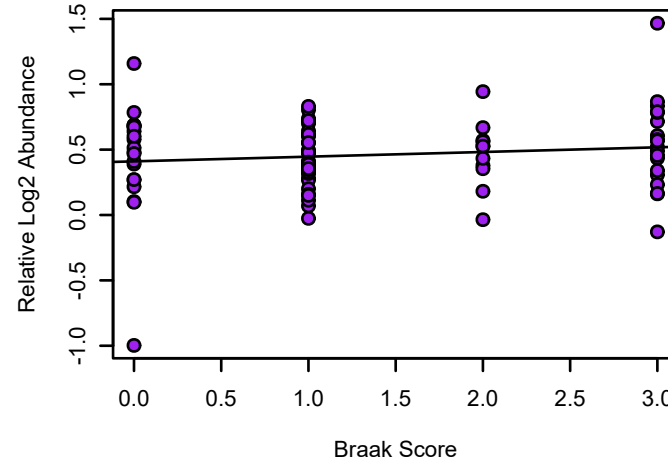

**bicor=0.048, p=0.63**  
**cor=0.12, p=0.23**

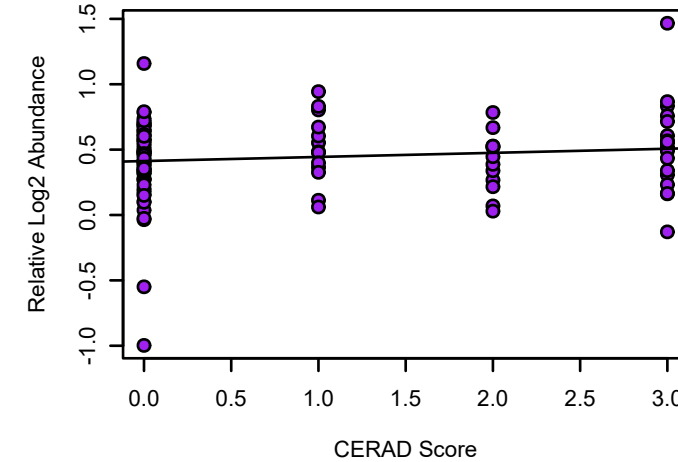

**PGM2L1 UPenn Mixed PRM**  
M1 turquoise MEGA module member  
K-W ANOVA p: 0.46

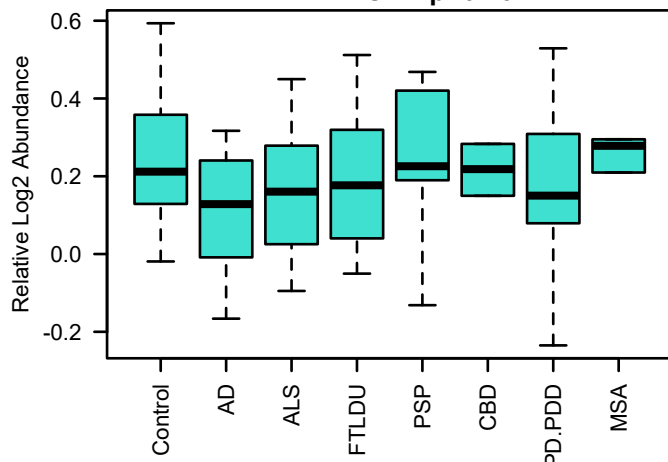

**PGM2L1 UPenn Mixed PRM**  
K-W ANOVA p: 0.097

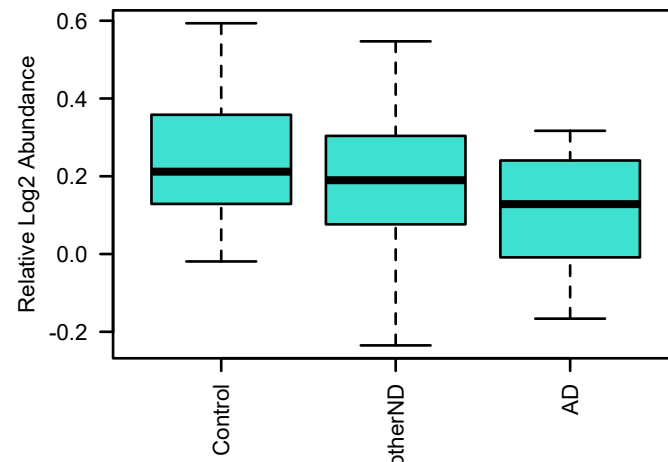

**bicor=-0.13, p=0.24**  
**cor=-0.15, p=0.17**

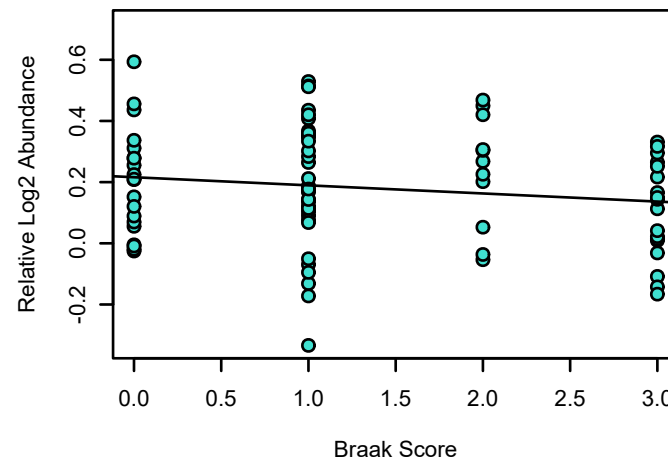

**bicor=-0.18, p=0.068**  
**cor=-0.18, p=0.073**

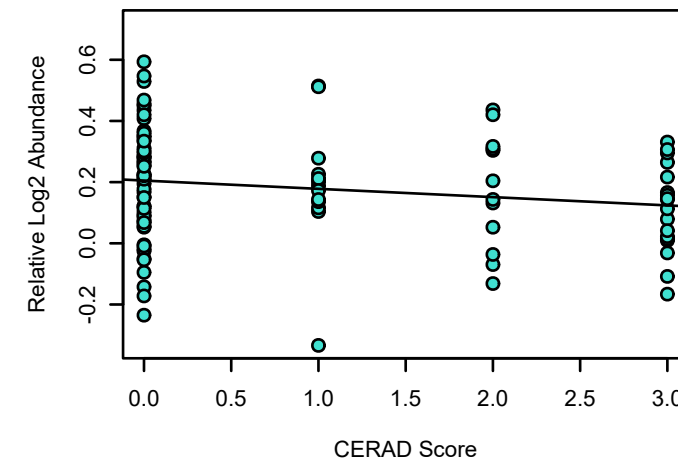

**RUFY3 UPenn Mixed PRM**  
M2 blue MEGA module member  
K-W ANOVA p: 0.0043

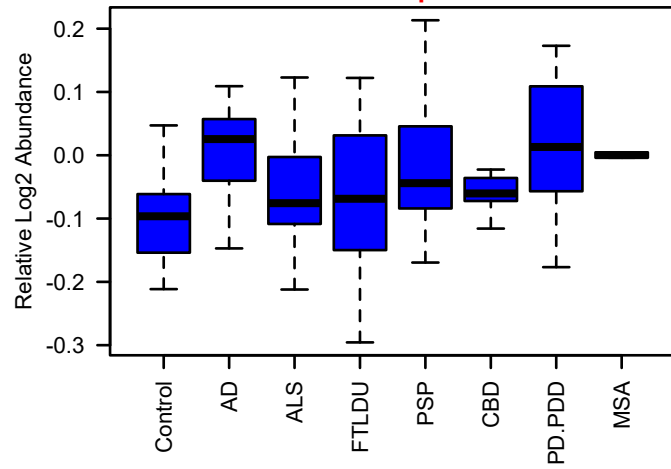

**RUFY3 UPenn Mixed PRM**  
K-W ANOVA p: 0.01

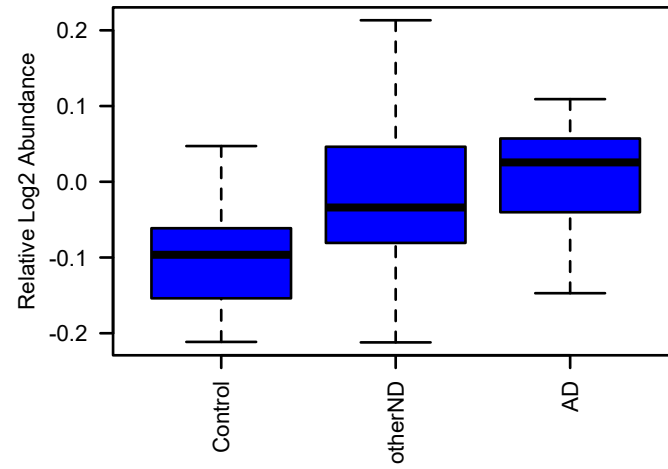

**bicor=0.24, p=0.027**  
**cor=0.21, p=0.055**

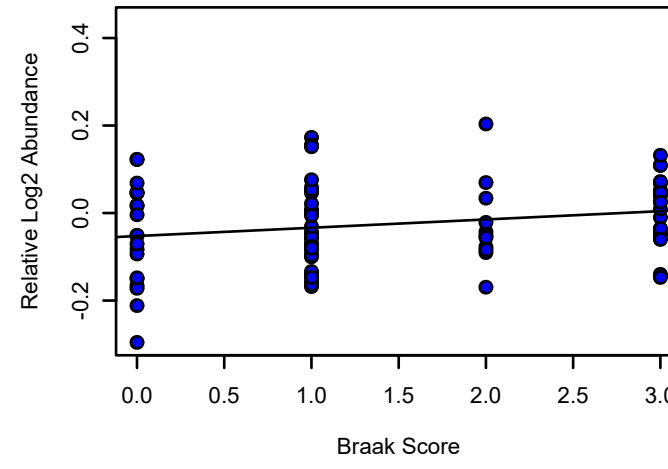

**bicor=0.21, p=0.036**  
**cor=0.19, p=0.058**

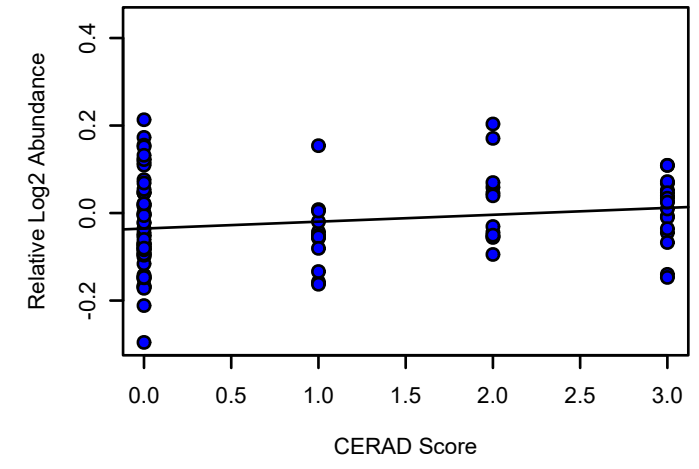

**SV2A UPenn Mixed PRM**  
M1 turquoise MEGA module member  
K-W ANOVA p: 0.98

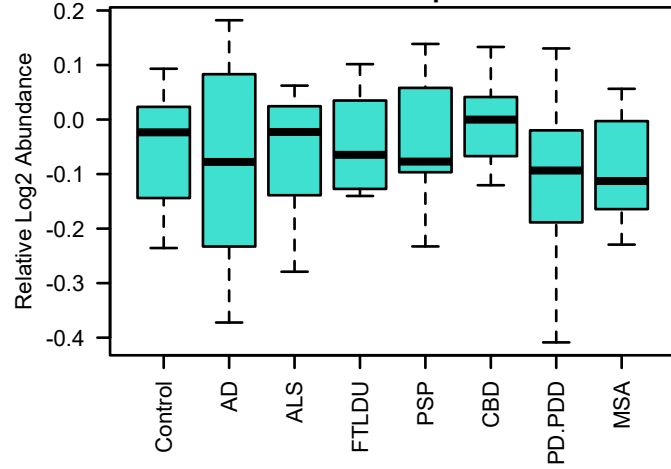

**SV2A UPenn Mixed PRM**  
K-W ANOVA p: 1

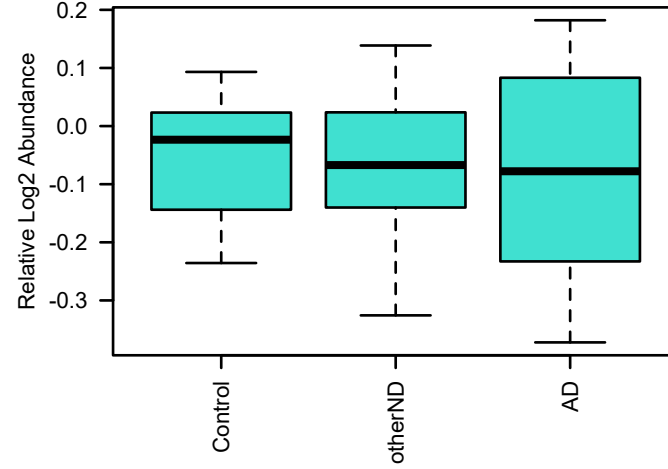

**bicor=-0.00018, p=1**  
**cor=0.026, p=0.81**

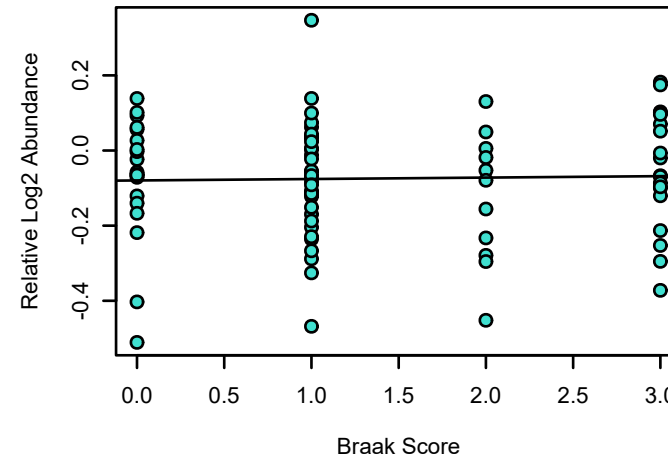

**bicor=0.01, p=0.92**  
**cor=0.0065, p=0.95**

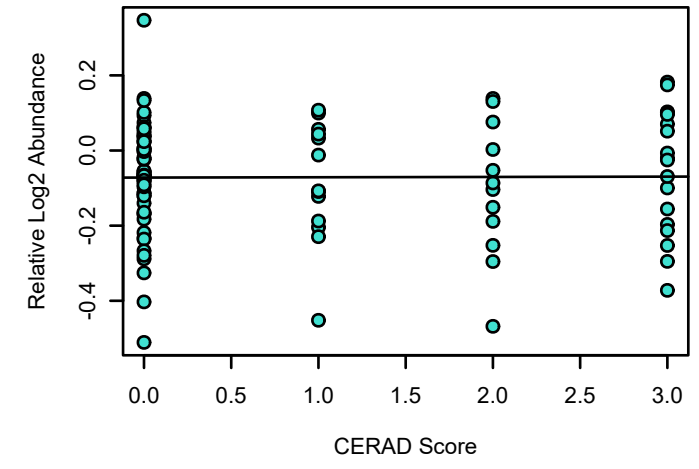

**SV2B UPenn Mixed PRM**  
M1 turquoise MEGA module member  
K-W ANOVA p: 0.0014

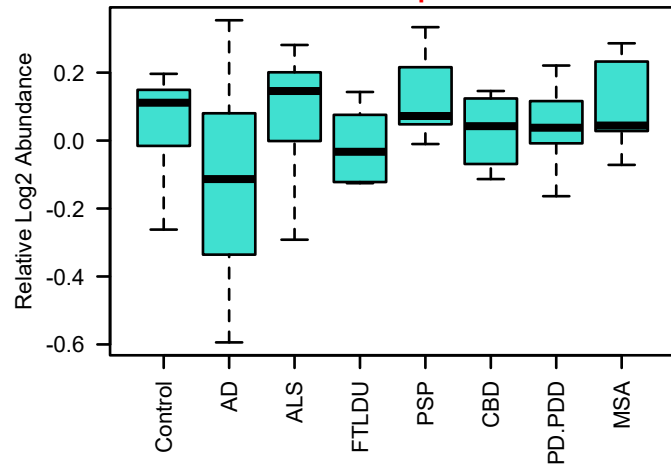

**SV2B UPenn Mixed PRM**  
K-W ANOVA p: 0.0014

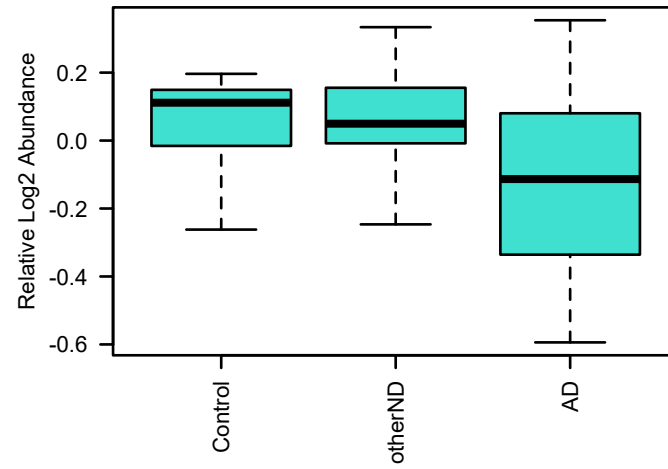

**bicor=-0.3, p=0.0056**  
**cor=-0.34, p=0.0016**

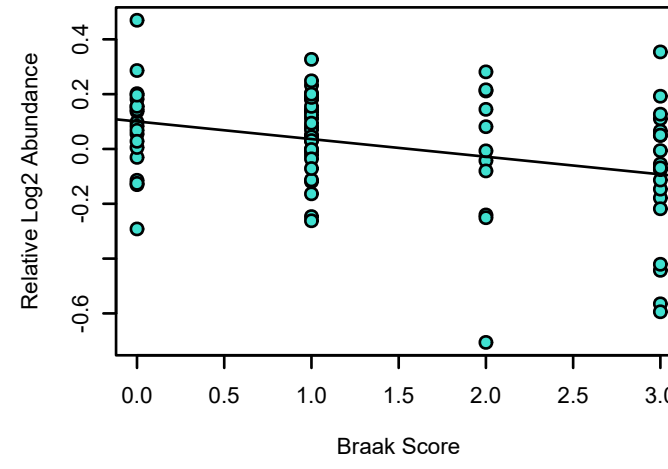

**bicor=-0.22, p=0.03**  
**cor=-0.26, p=0.009**

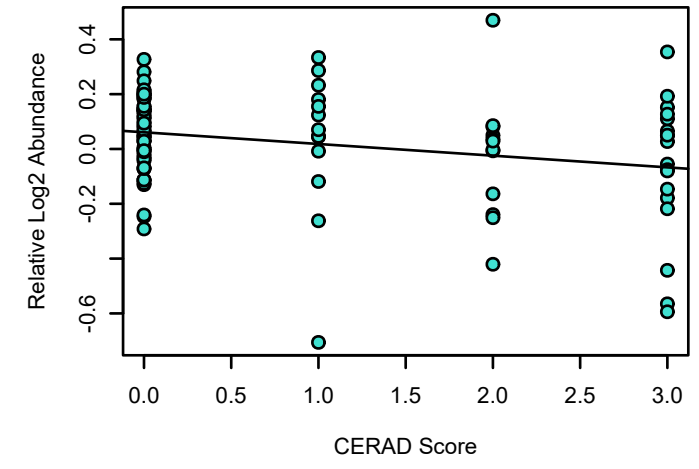

**SV2C UPenn Mixed PRM**  
NA grey20 MEGA module member  
K-W ANOVA p: 0.46

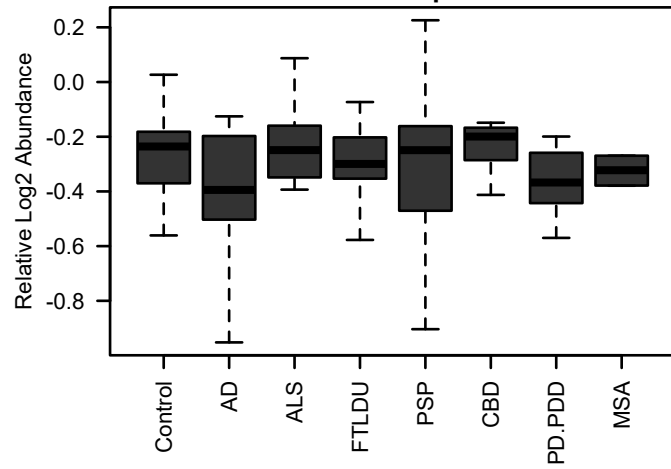

**SV2C UPenn Mixed PRM**  
K-W ANOVA p: 0.24

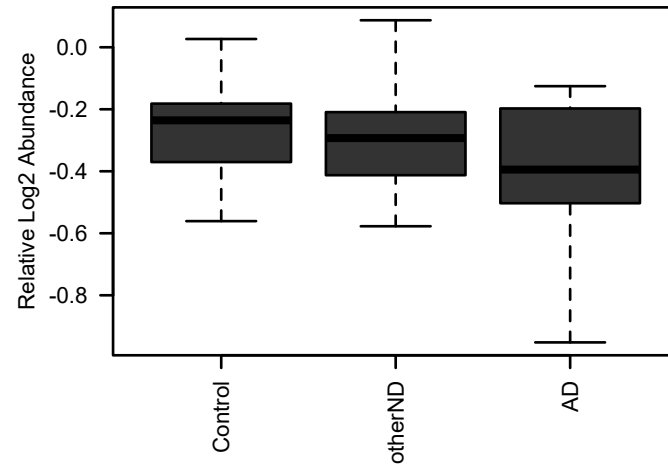

**bicor=-0.2, p=0.066**  
**cor=-0.18, p=0.1**

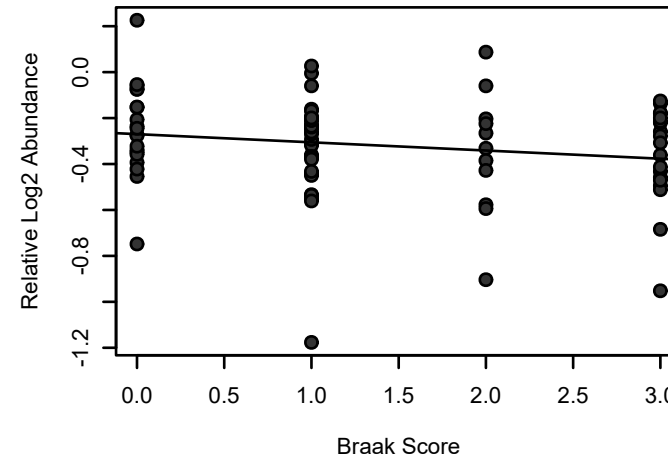

**bicor=-0.13, p=0.21**  
**cor=-0.16, p=0.11**

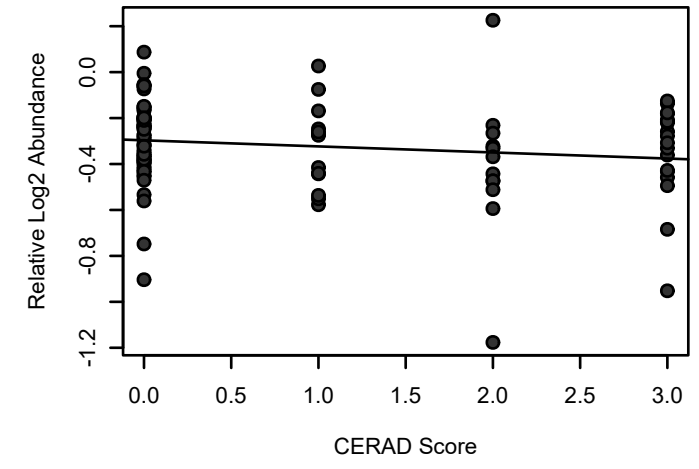



**ATCAY UPenn Mixed PRM**  
M1 turquoise MEGA module member  
K-W ANOVA p: 0.77

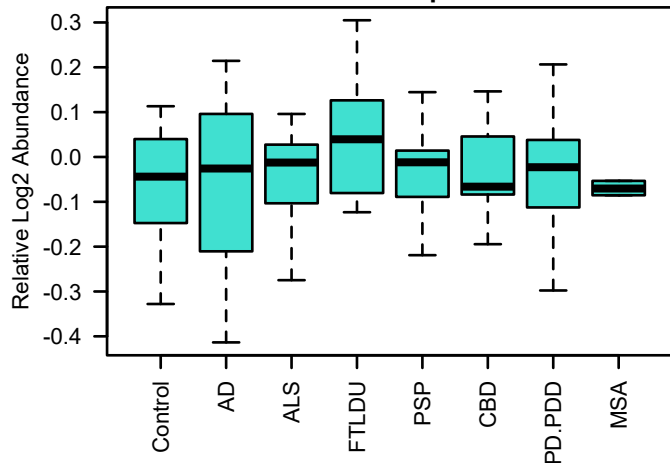

**ATCAY UPenn Mixed PRM**  
K-W ANOVA p: 0.86

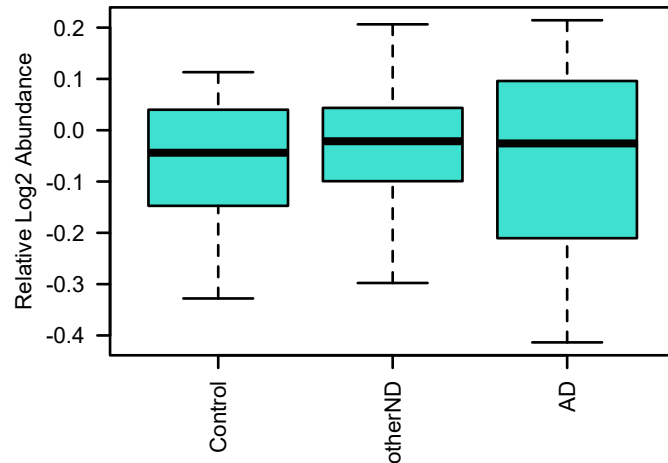

**bicor=0.01, p=0.93**  
**cor=0.047, p=0.67**

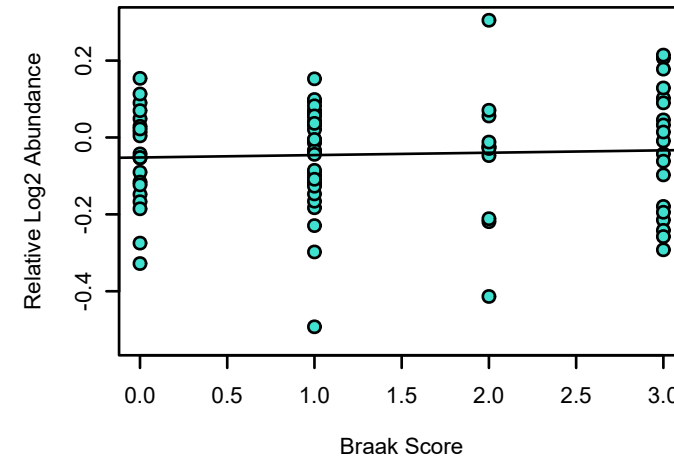

**bicor=-0.0011, p=0.99**  
**cor=-0.028, p=0.78**

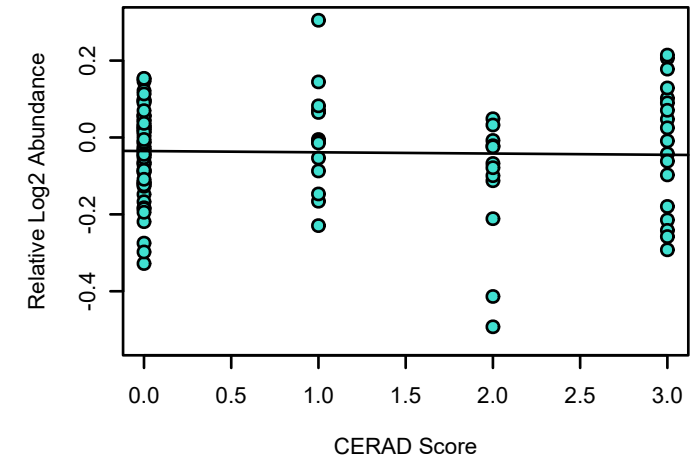

**HOMER1 UPenn Mixed PRM**  
M1 turquoise MEGA module member  
K-W ANOVA p: 0.00019

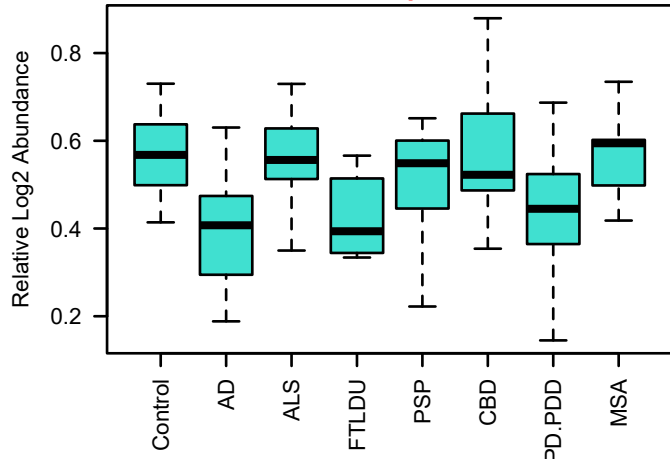

**HOMER1 UPenn Mixed PRM**  
K-W ANOVA p: 0.0038

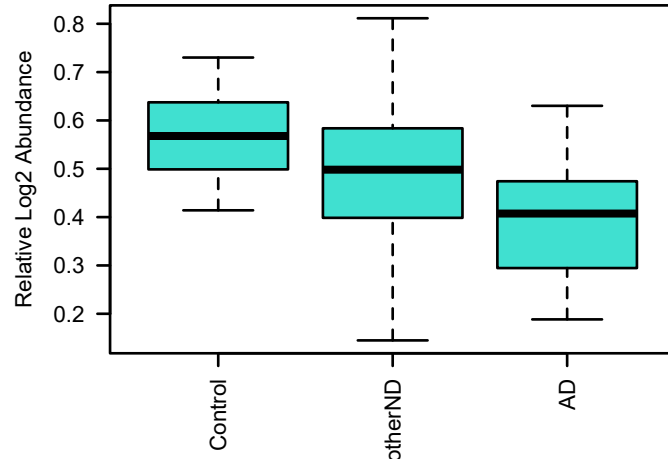

**bicor=-0.32, p=0.0026**  
**cor=-0.29, p=0.0075**

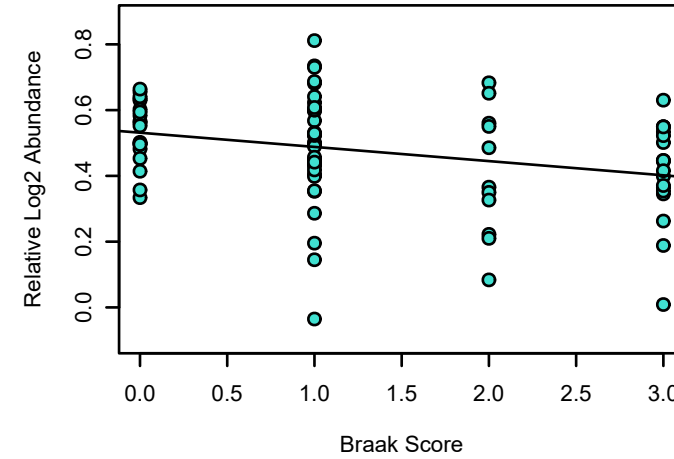

**bicor=-0.33, p=0.00082**  
**cor=-0.34, p=0.00054**

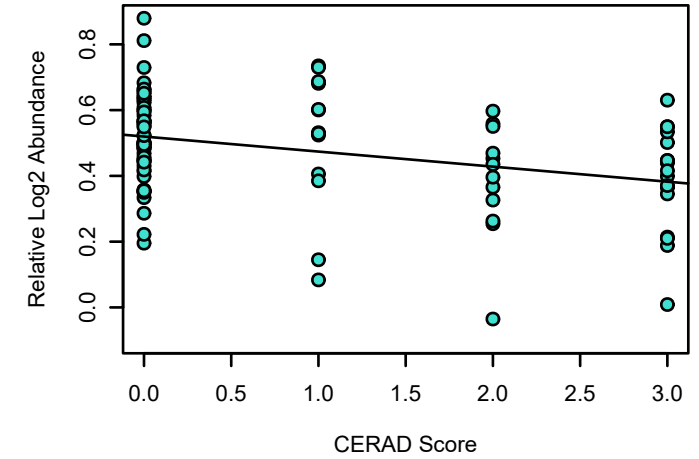

**SYT12 UPenn Mixed PRM**  
M3 brown MEGA module member  
K-W ANOVA p: 6.5e-05

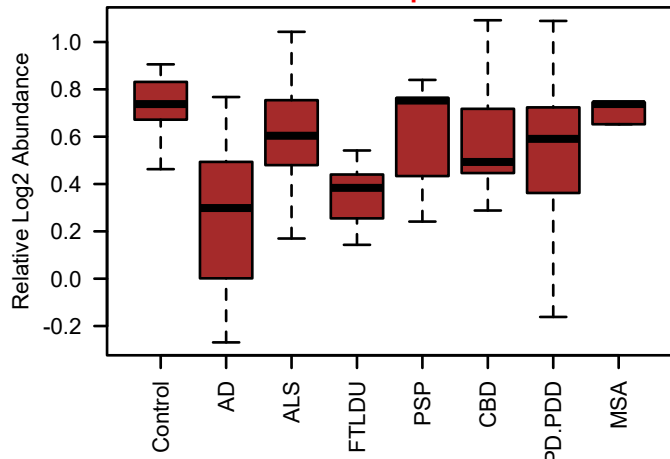

**SYT12 UPenn Mixed PRM**  
K-W ANOVA p: 7.5e-06

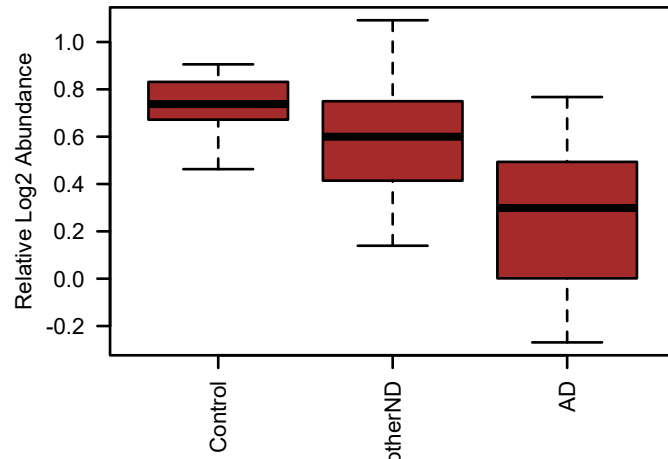

**bicor=-0.4, p=0.00016**  
**cor=-0.41, p=0.00011**

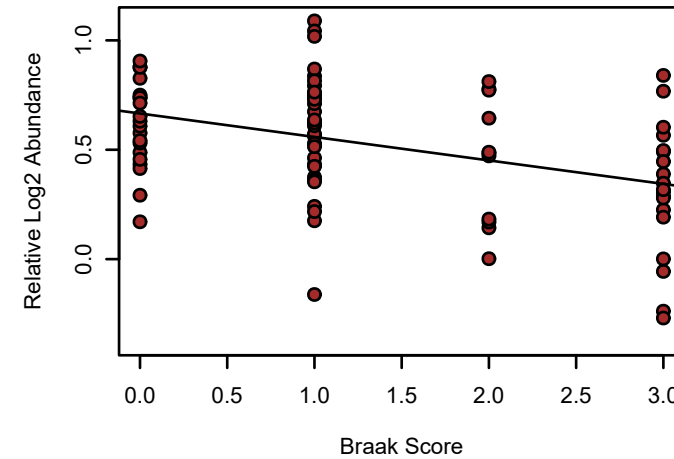

**bicor=-0.39, p=5.2e-05**  
**cor=-0.41, p=2.3e-05**

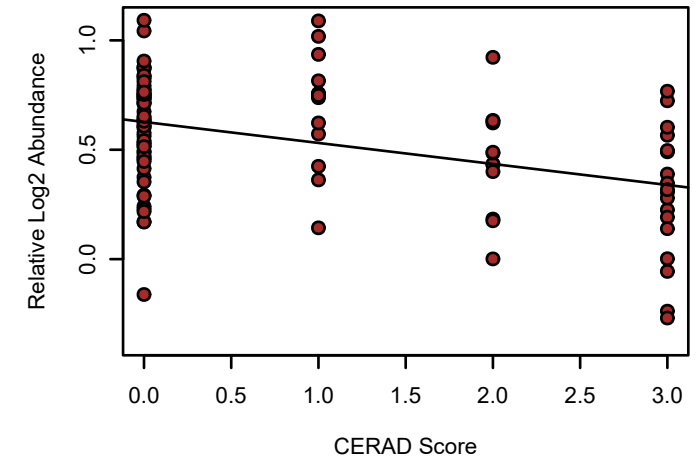

**SIRT2 UPenn Mixed PRM**  
M2 blue MEGA module member  
K-W ANOVA p: 0.093

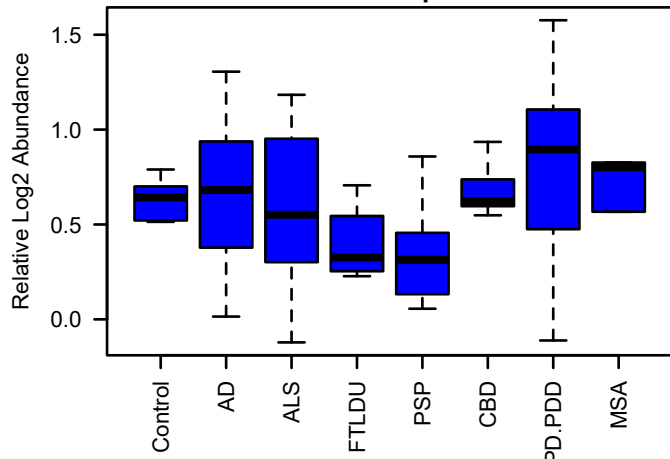

**SIRT2 UPenn Mixed PRM**  
K-W ANOVA p: 0.98

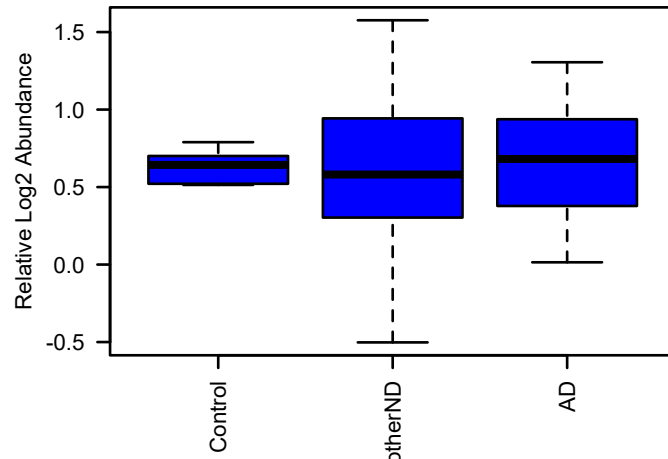

**bicor=0.091, p=0.41**  
**cor=0.086, p=0.44**

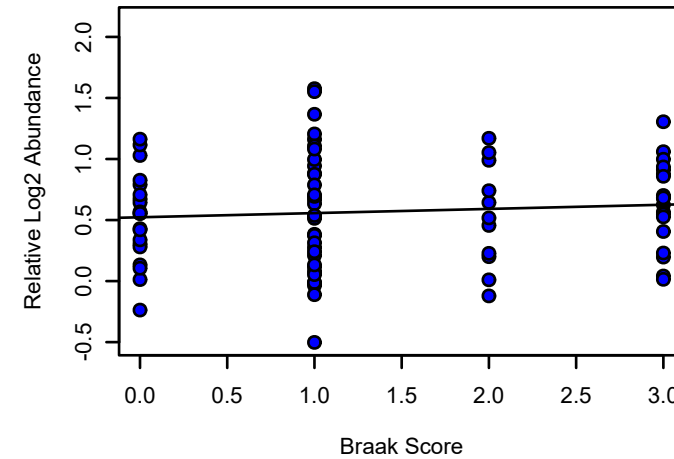

**bicor=0.028, p=0.78**  
**cor=0.03, p=0.77**

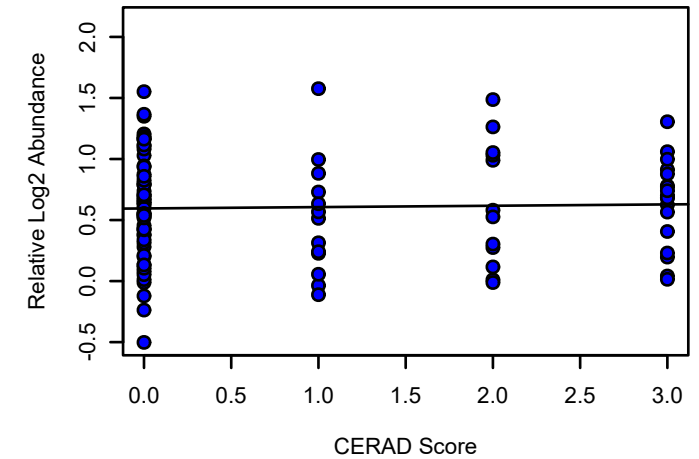

**CADM3 UPenn Mixed PRM**  
**M1 turquoise MEGA module member**  
**K-W ANOVA p: 2.7e-05**

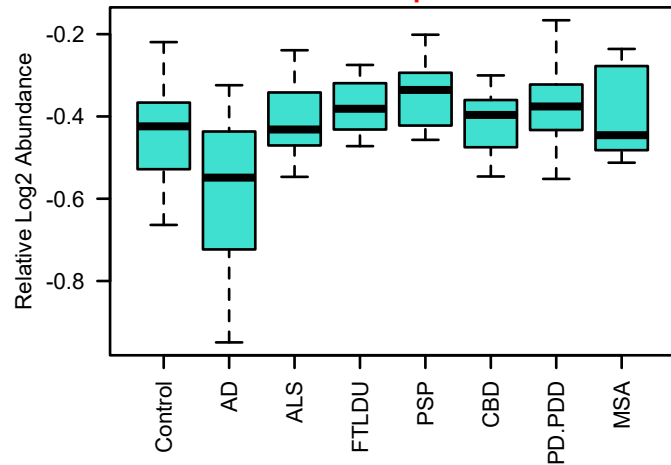

**CADM3 UPenn Mixed PRM**  
**K-W ANOVA p: 1.9e-07**

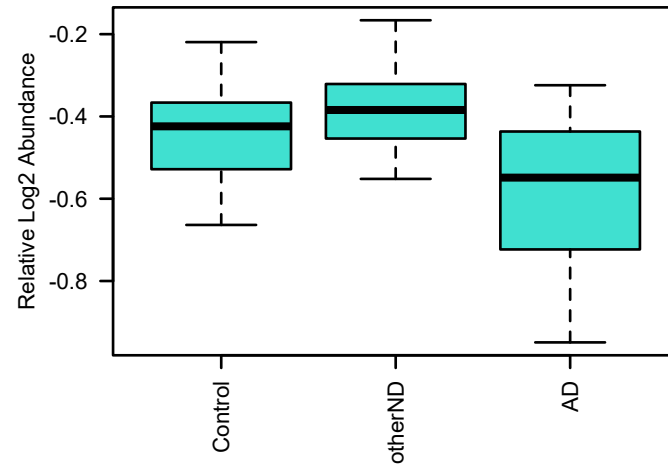

**bicor=-0.34, p=0.0014**  
**cor=-0.38, p=0.00036**

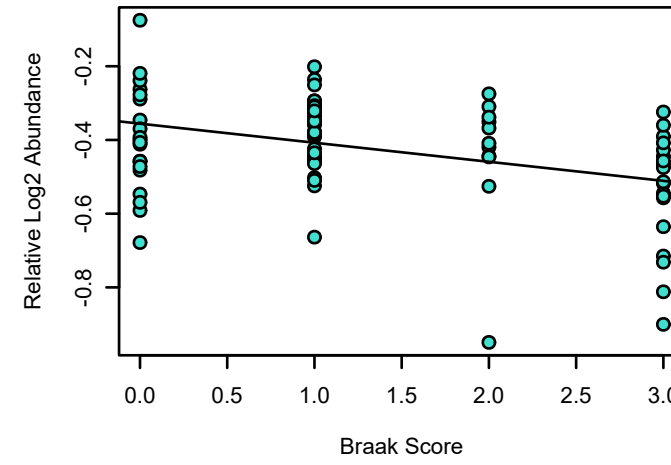

**bicor=-0.23, p=0.021**  
**cor=-0.27, p=0.0066**

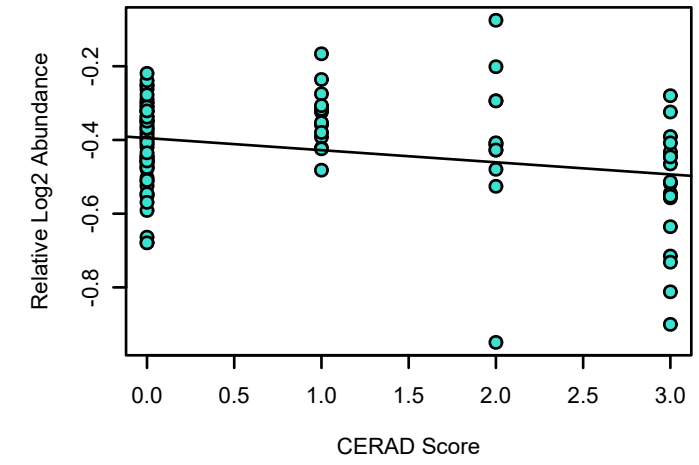

**SYNPO UPenn Mixed PRM**  
**M6 red MEGA module member**  
**K-W ANOVA p: 2.7e-09**

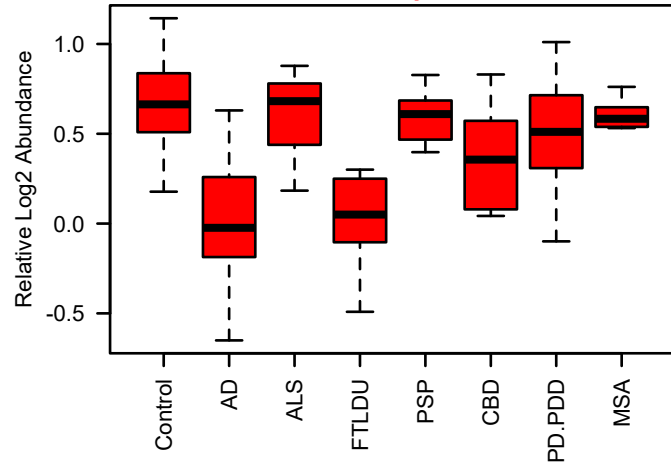

**SYNPO UPenn Mixed PRM**  
**K-W ANOVA p: 5.9e-08**

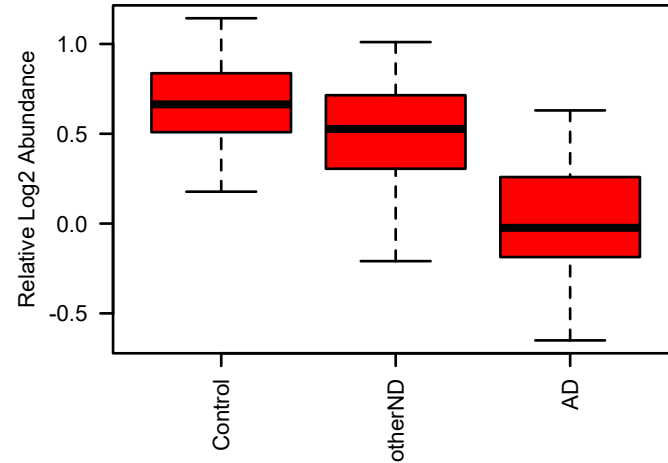

**bicor=-0.39, p=0.00027**  
**cor=-0.4, p=0.00016**

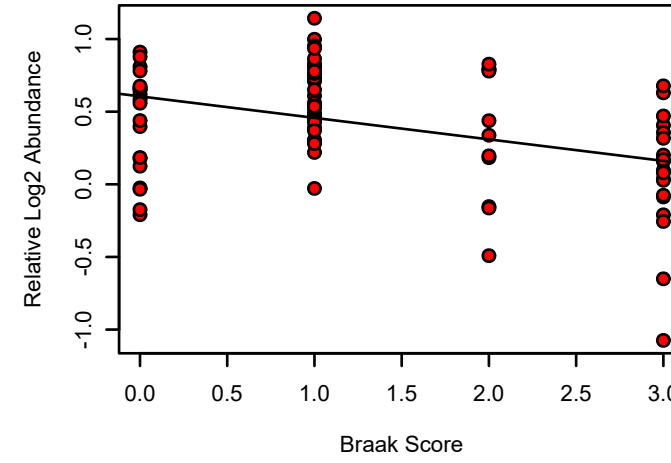

**bicor=-0.4, p=3.9e-05**  
**cor=-0.42, p=1.4e-05**

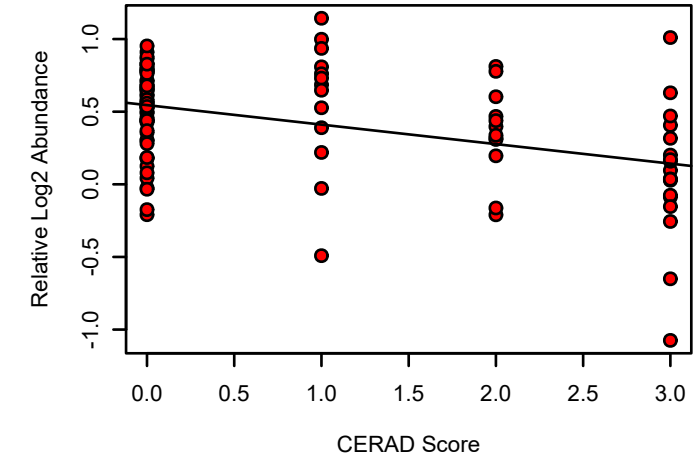

**DPP10 UPenn Mixed PRM**  
**M1 turquoise MEGA module member**  
**K-W ANOVA p: 0.46**

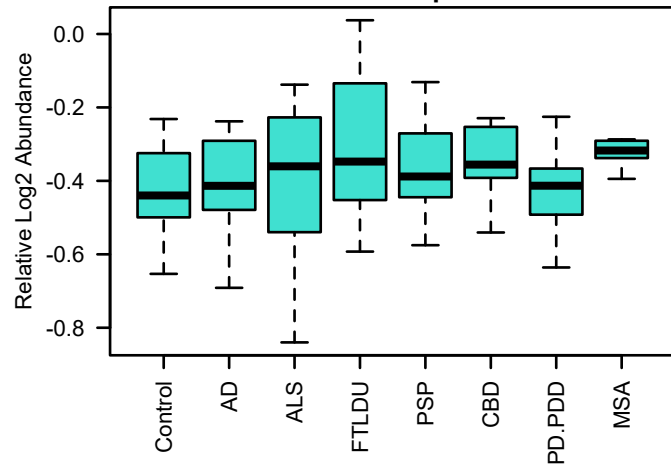

**DPP10 UPenn Mixed PRM**  
**K-W ANOVA p: 0.62**

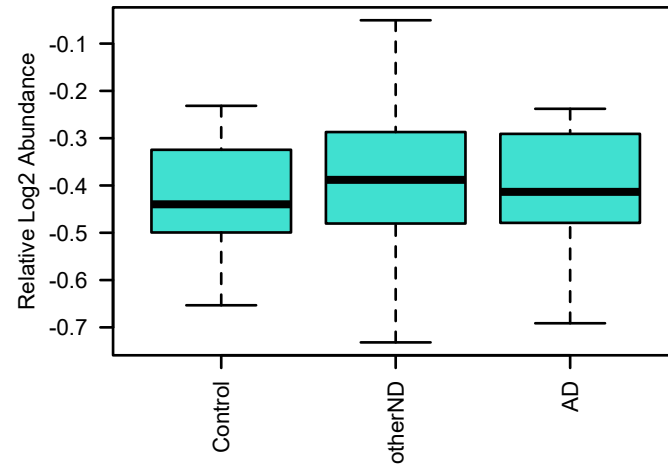

**bicor=-8.1e-05, p=1**  
**cor=0.013, p=0.91**

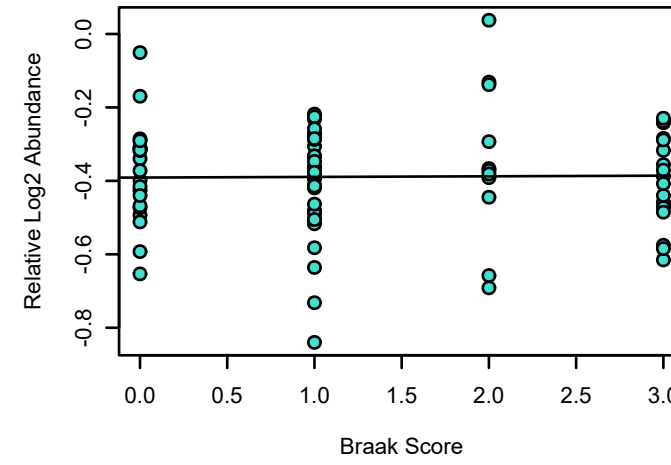

**bicor=-0.063, p=0.53**  
**cor=-0.048, p=0.64**

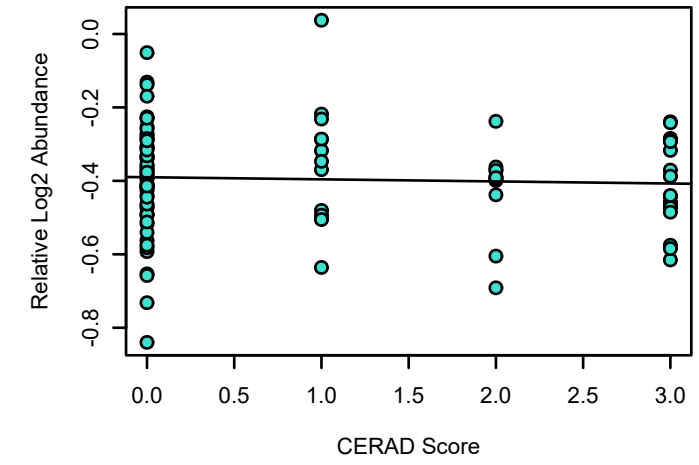

**ERMN UPenn Mixed PRM**  
**M2 blue MEGA module member**  
**K-W ANOVA p: 0.025**

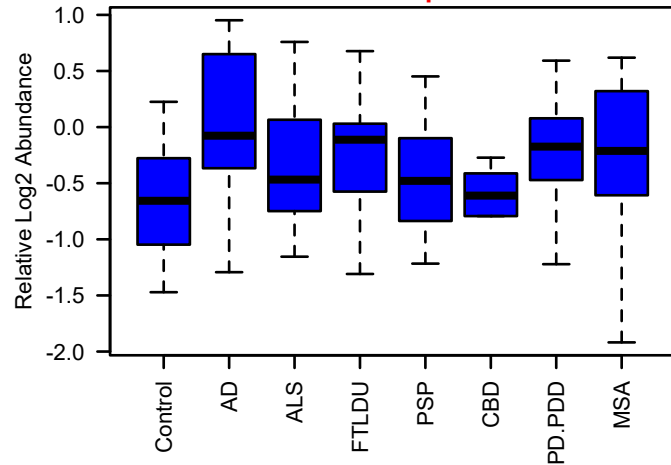

**ERMN UPenn Mixed PRM**  
**K-W ANOVA p: 0.0098**

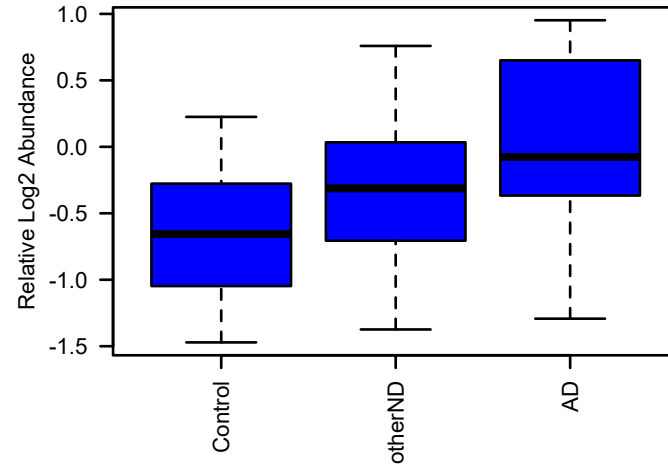

**bicor=0.25, p=0.024**  
**cor=0.26, p=0.017**

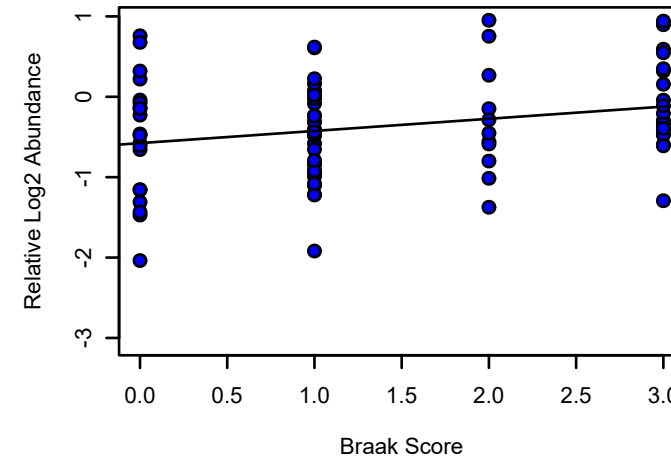

**bicor=0.19, p=0.057**  
**cor=0.19, p=0.058**

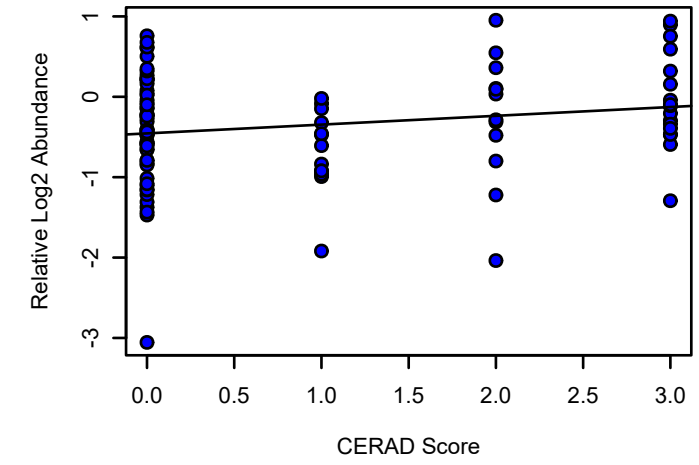

**DMXL2 UPenn Mixed PRM**  
M1 turquoise MEGA module member  
K-W ANOVA p: 0.00099

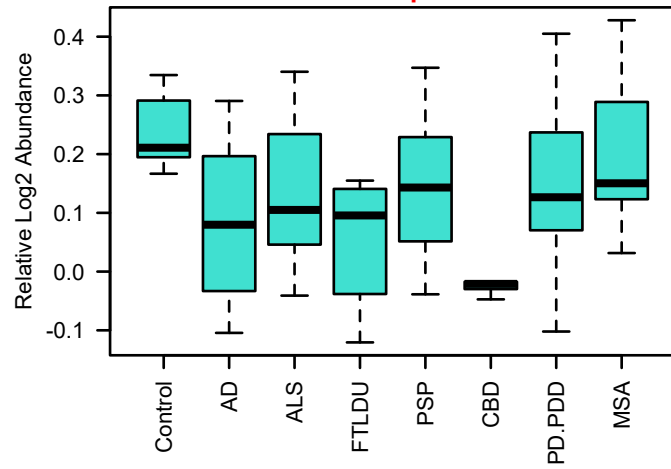

**DMXL2 UPenn Mixed PRM**  
K-W ANOVA p: 0.0023

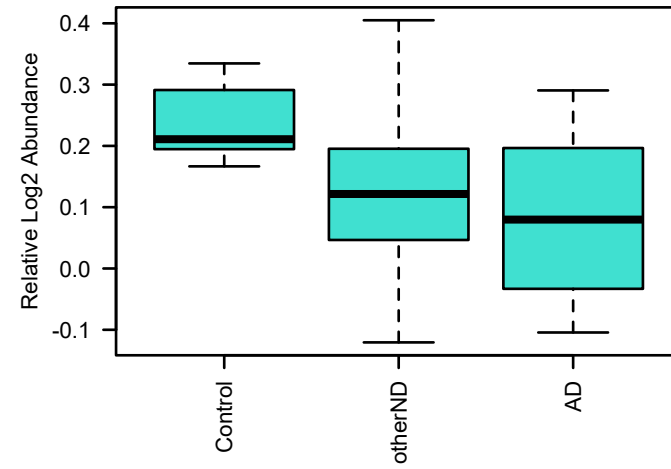

**bicor=-0.34, p=0.0017**  
**cor=-0.3, p=0.0056**

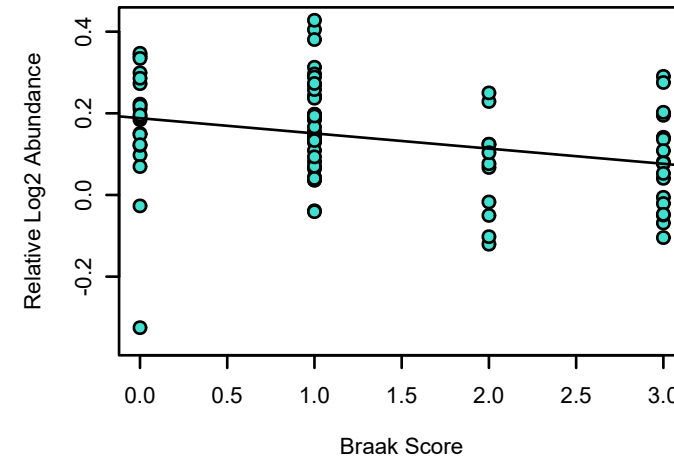

**bicor=-0.083, p=0.41**  
**cor=-0.069, p=0.5**

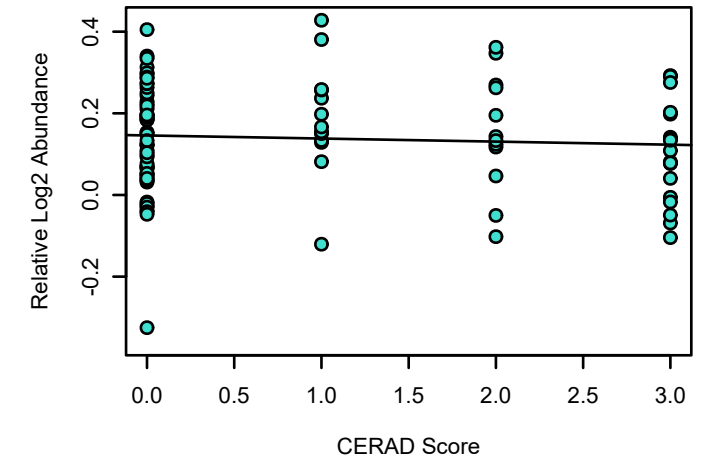

**PDCD6IP UPenn Mixed PRM**  
NA grey MEGA module member  
K-W ANOVA p: 0.0078

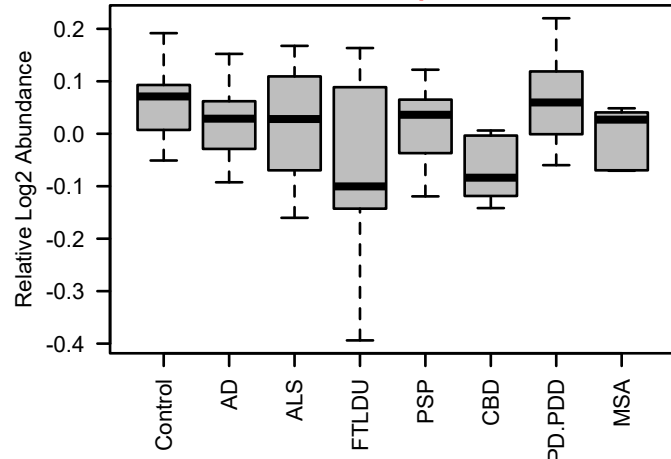

**PDCD6IP UPenn Mixed PRM**  
K-W ANOVA p: 0.6

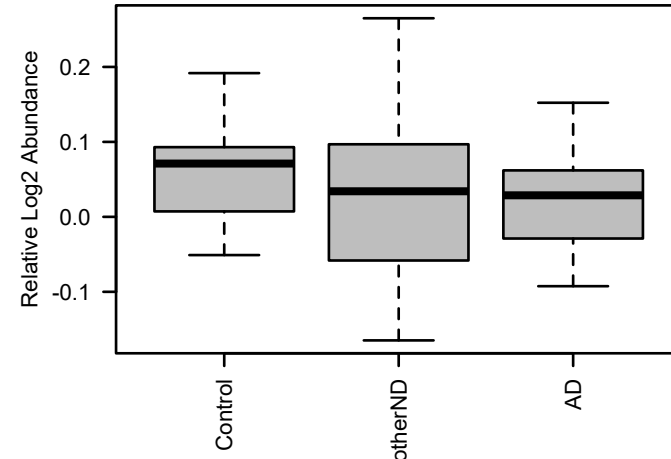

**bicor=-0.16, p=0.14**  
**cor=-0.14, p=0.2**

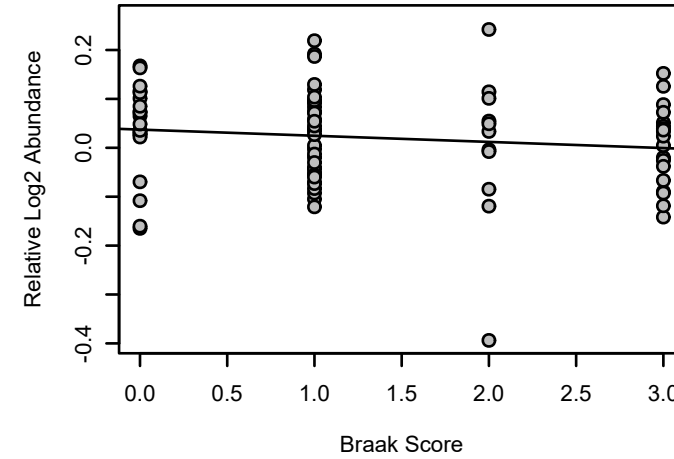

**bicor=0.022, p=0.83**  
**cor=0.029, p=0.77**

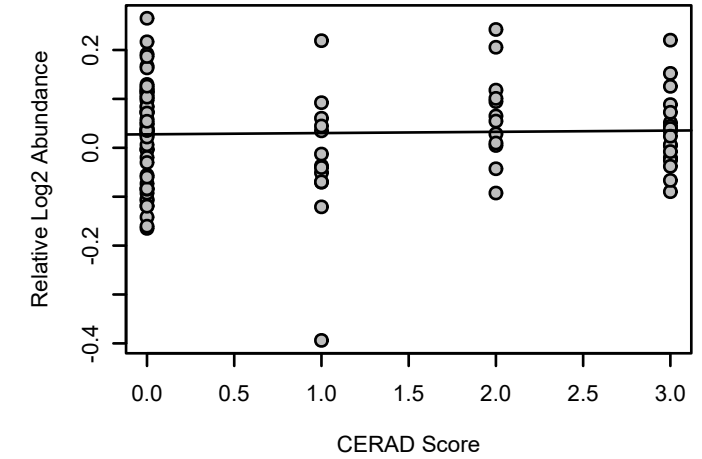

**CASKIN1 UPenn Mixed PRM**  
M1 turquoise MEGA module member  
K-W ANOVA p: 2.9e-06

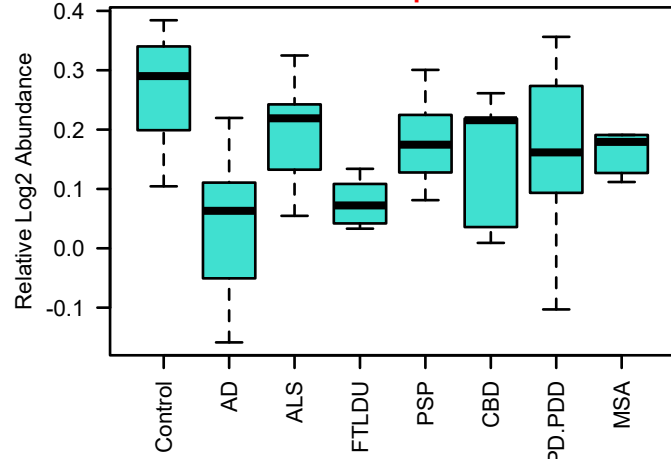

**CASKIN1 UPenn Mixed PRM**  
K-W ANOVA p: 3.1e-07

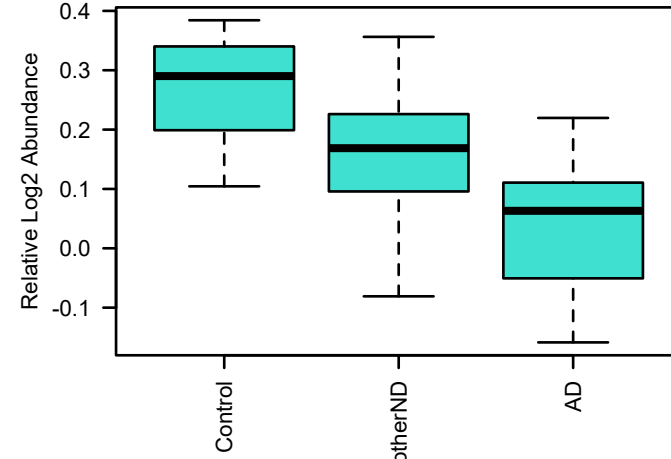

**bicor=-0.48, p=4e-06**  
**cor=-0.51, p=7.2e-07**

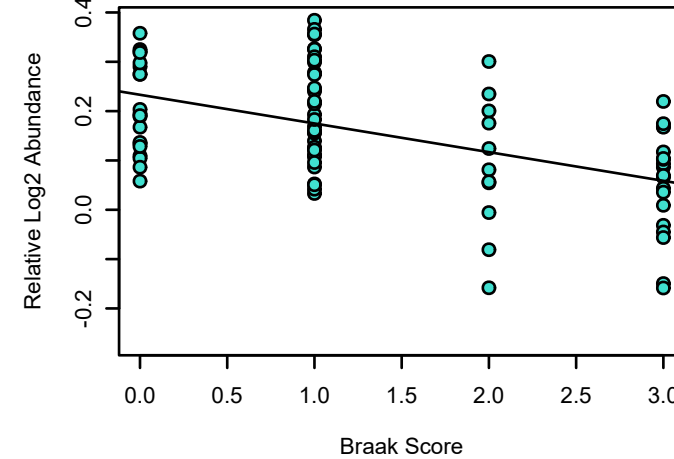

**bicor=-0.42, p=1.1e-05**  
**cor=-0.44, p=4.6e-06**

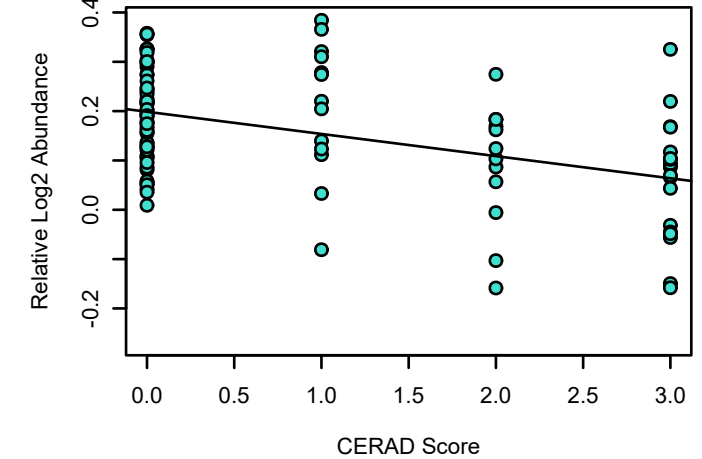

**ATL1 UPenn Mixed PRM**  
M1 turquoise MEGA module member  
K-W ANOVA p: 0.16

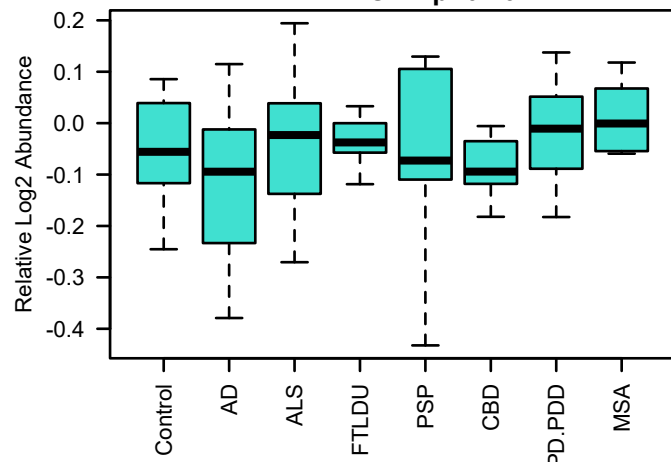

**ATL1 UPenn Mixed PRM**  
K-W ANOVA p: 0.049

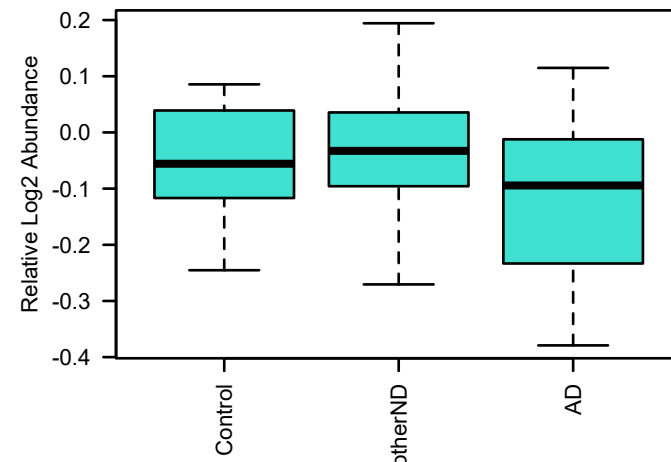

**bicor=-0.15, p=0.18**  
**cor=-0.15, p=0.17**

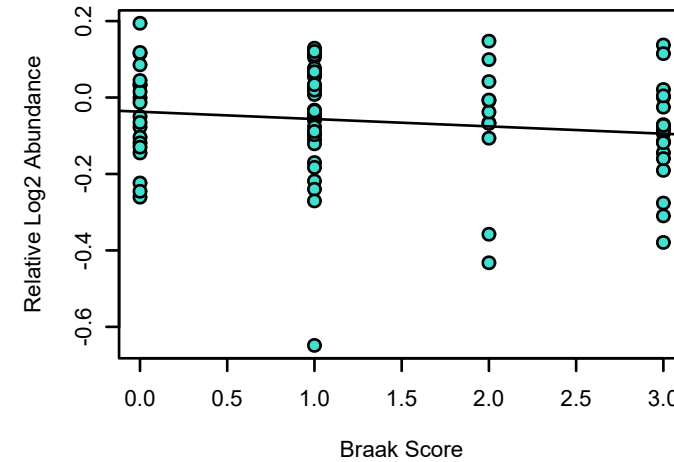

**bicor=-0.092, p=0.36**  
**cor=-0.13, p=0.2**

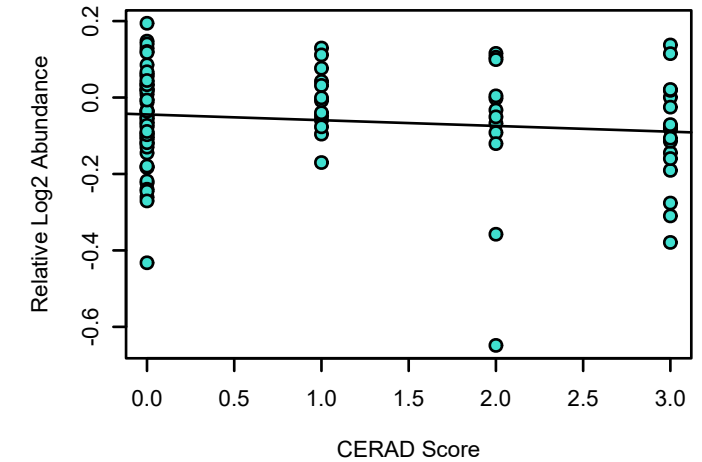

**MADD UPenn Mixed PRM**  
M1 turquoise MEGA module member  
K-W ANOVA p: 0.53

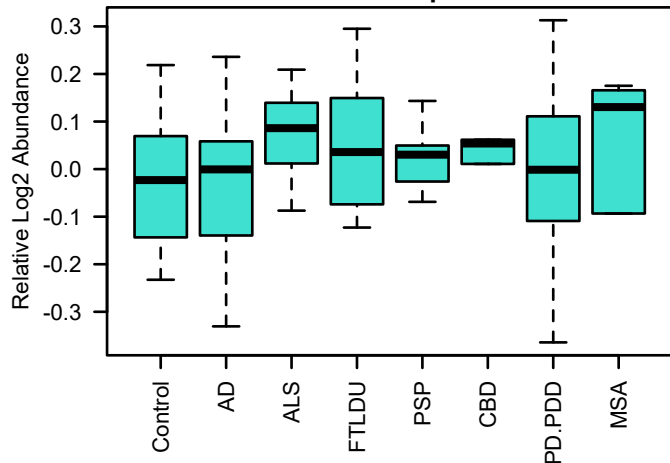

**MADD UPenn Mixed PRM**  
K-W ANOVA p: 0.38

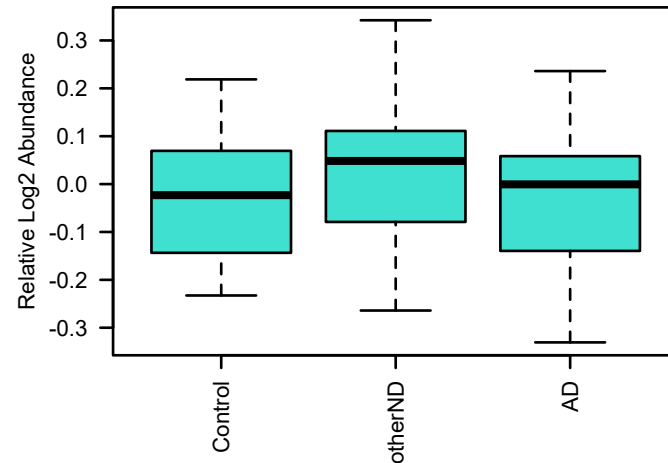

**bicor=-0.18, p=0.11**  
**cor=-0.18, p=0.1**

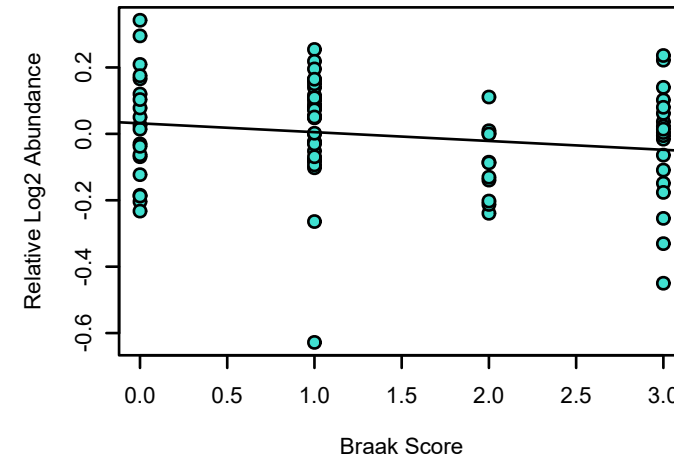

**bicor=-0.086, p=0.39**  
**cor=-0.1, p=0.32**

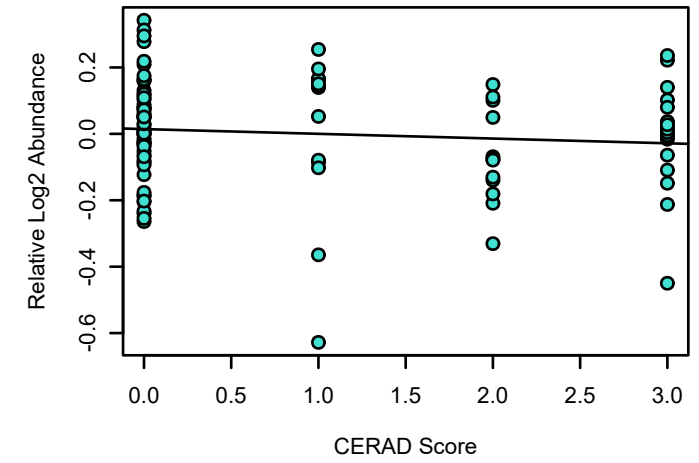

**HSPH1 UPenn Mixed PRM**  
M11 greenyellow MEGA module member  
K-W ANOVA p: 0.58

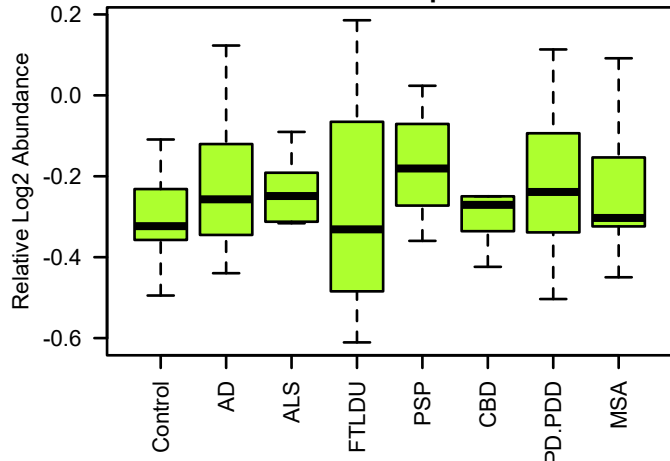

**HSPH1 UPenn Mixed PRM**  
K-W ANOVA p: 0.37

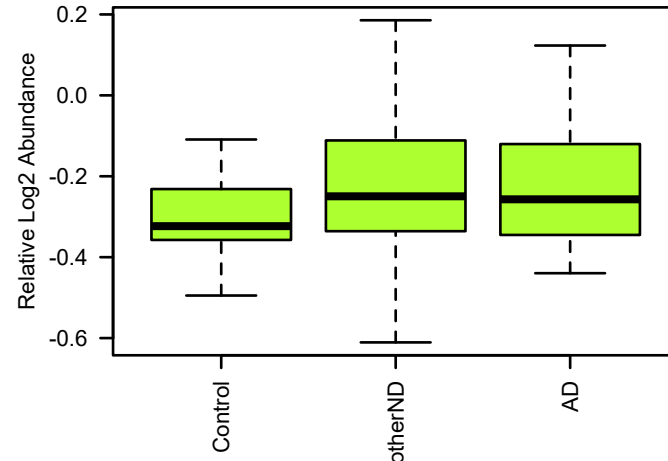

**bicor=0.18, p=0.093**  
**cor=0.13, p=0.24**

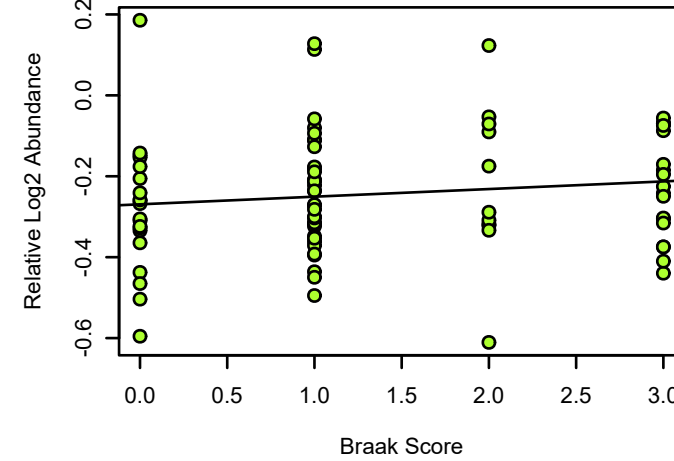

**bicor=-0.028, p=0.78**  
**cor=-0.039, p=0.7**

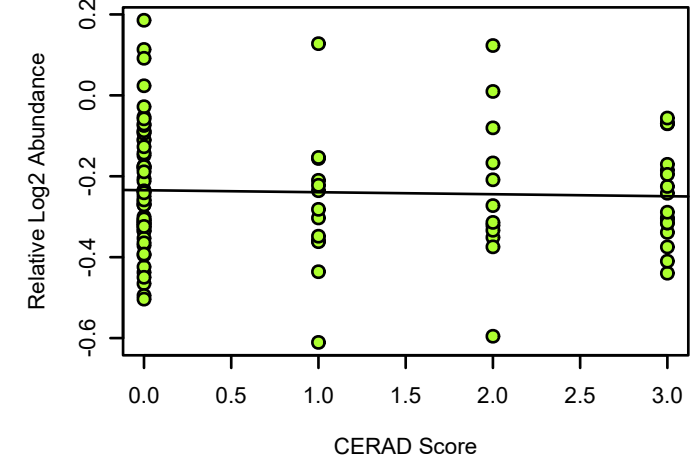

**ATP6V0A1 UPenn Mixed PRM**  
M1 turquoise MEGA module member  
K-W ANOVA p: 0.033

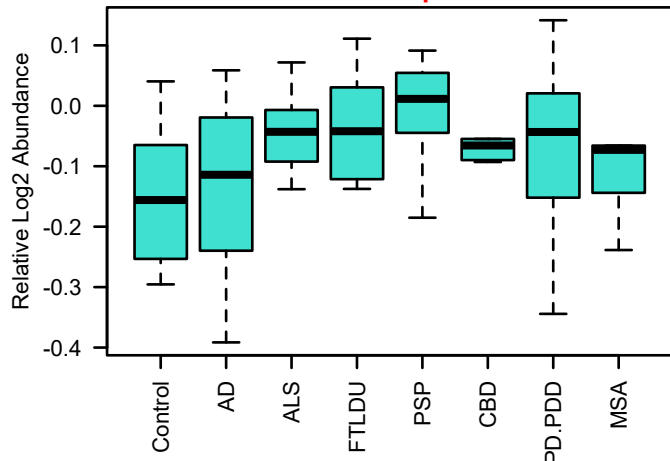

**ATP6V0A1 UPenn Mixed PRM**  
K-W ANOVA p: 0.0012

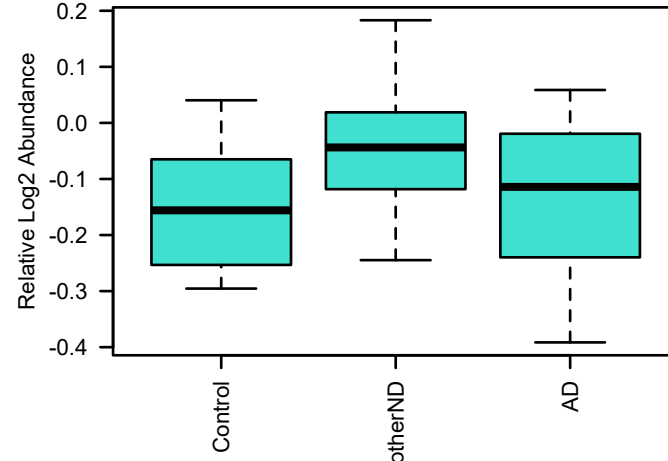

**bicor=-0.11, p=0.33**  
**cor=-0.088, p=0.43**

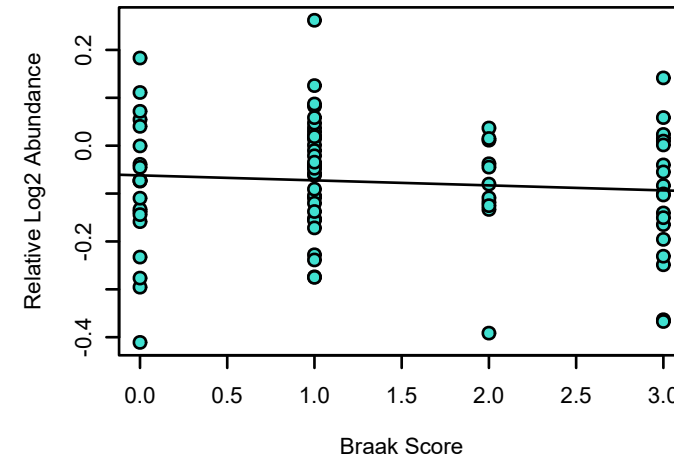

**bicor=-0.099, p=0.33**  
**cor=-0.11, p=0.28**

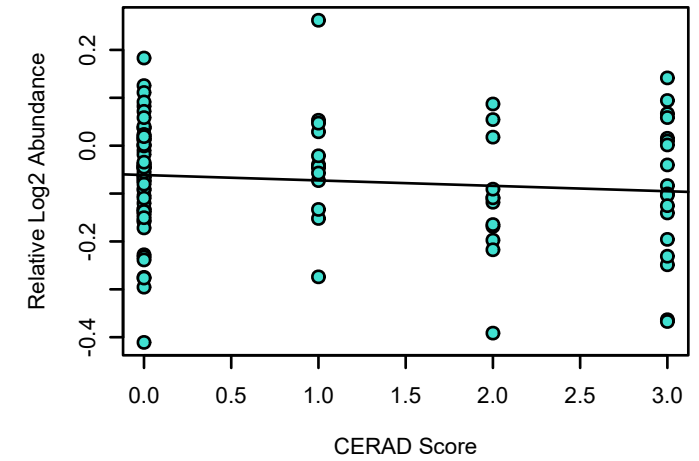

**PDXP UPenn Mixed PRM**  
M1 turquoise MEGA module member  
K-W ANOVA p: 0.14

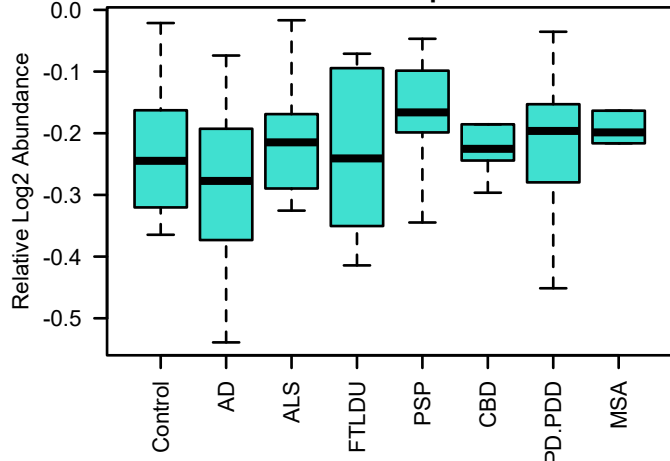

**PDXP UPenn Mixed PRM**  
K-W ANOVA p: 0.021

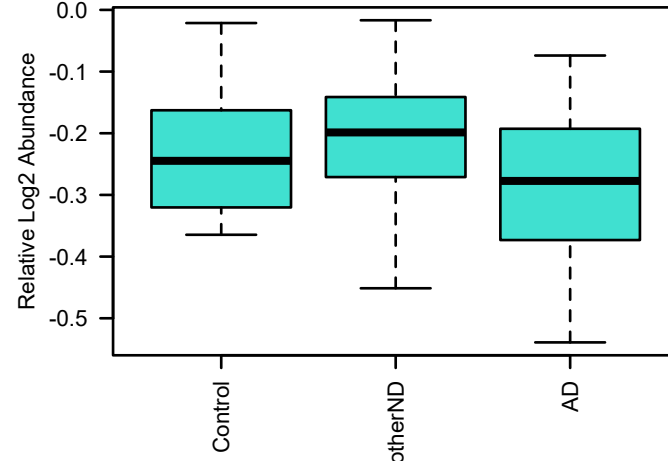

**bicor=-0.11, p=0.32**  
**cor=-0.12, p=0.28**

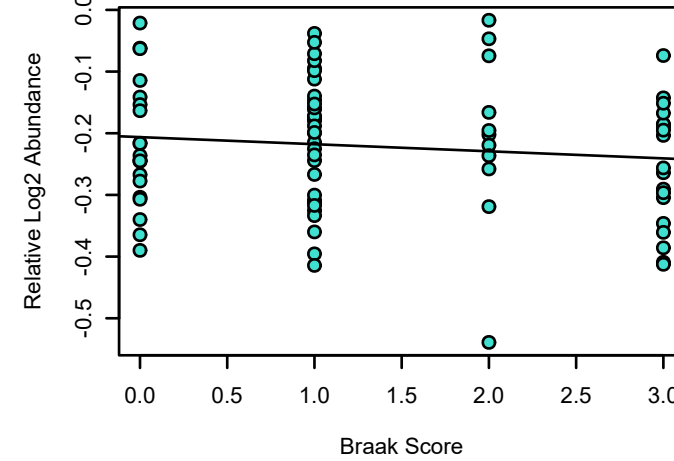

**bicor=-0.14, p=0.17**  
**cor=-0.16, p=0.11**

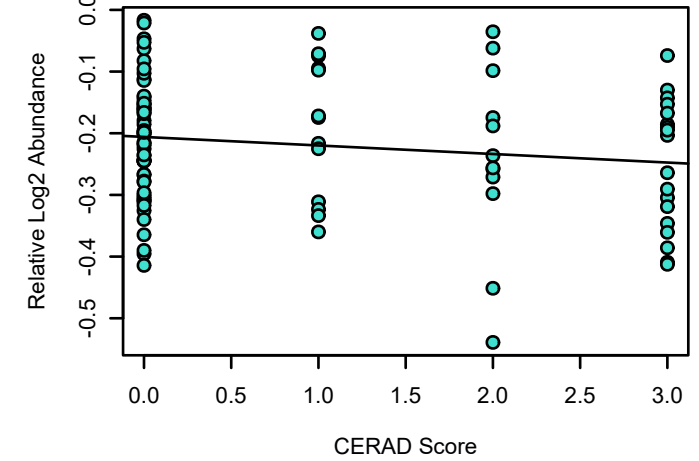



**CNDP2 UPenn Mixed PRM**  
M2 blue MEGA module member  
K-W ANOVA p: 8e-05

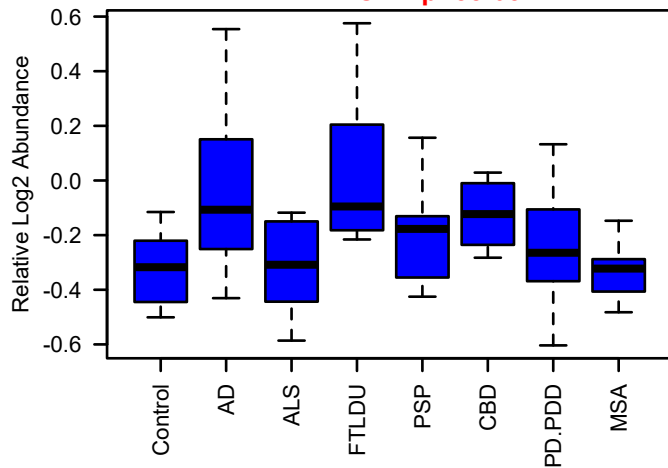

**CNDP2 UPenn Mixed PRM**  
K-W ANOVA p: 0.00022

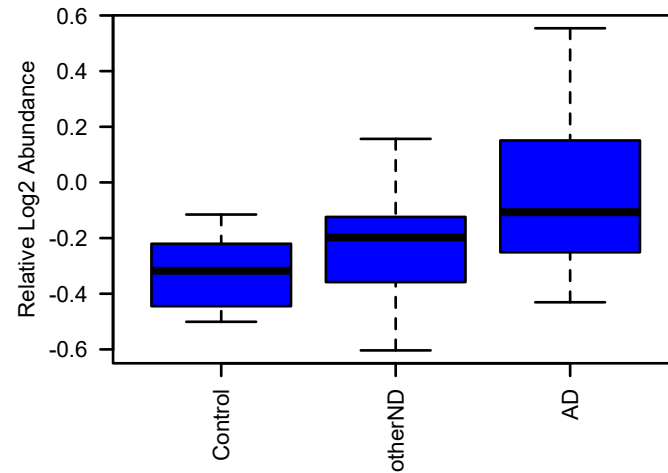

**bicor=0.28, p=0.011**  
**cor=0.35, p=0.0011**

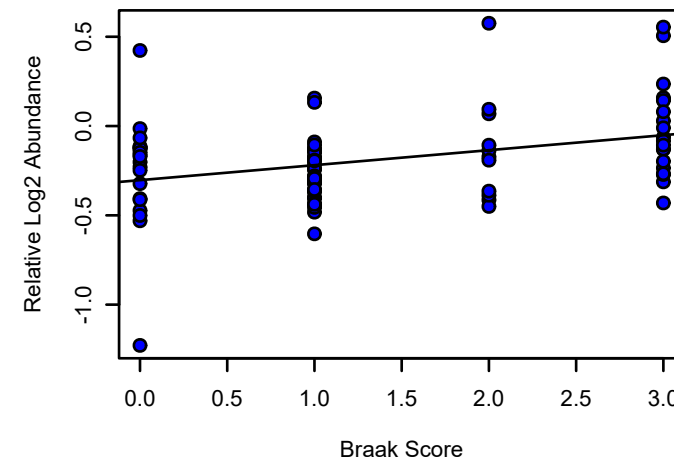

**bicor=0.21, p=0.034**  
**cor=0.26, p=0.009**

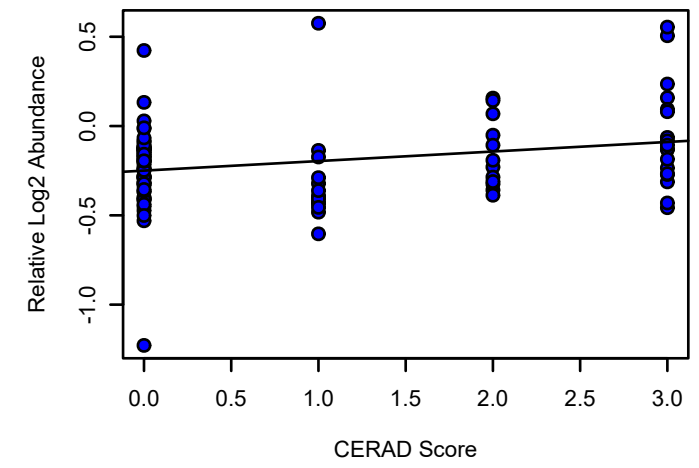

**SCN2A UPenn Mixed PRM**  
M1 turquoise MEGA module member  
K-W ANOVA p: 0.0014

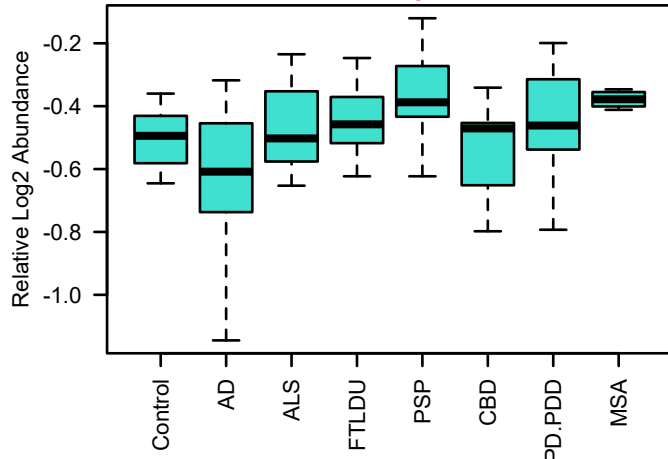

**SCN2A UPenn Mixed PRM**  
K-W ANOVA p: 0.00014

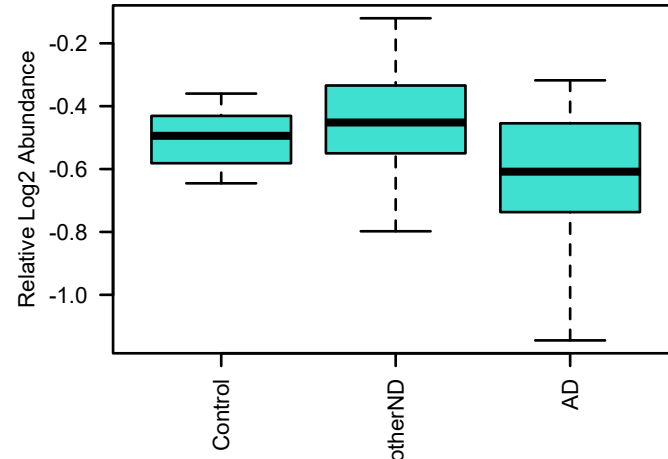

**bicor=-0.27, p=0.012**  
**cor=-0.31, p=0.0041**

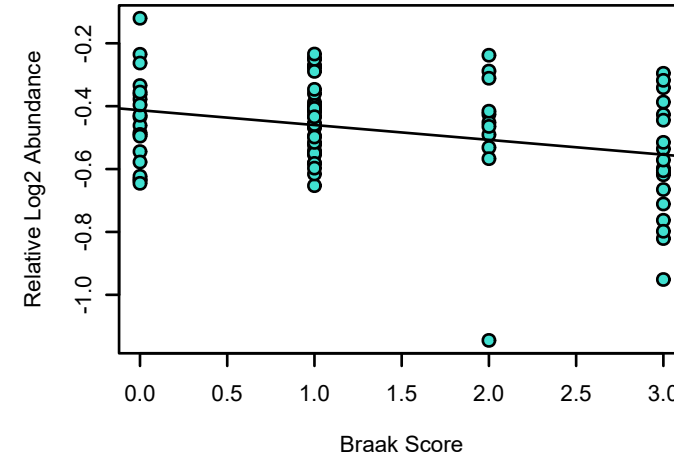

**bicor=-0.13, p=0.2**  
**cor=-0.16, p=0.11**

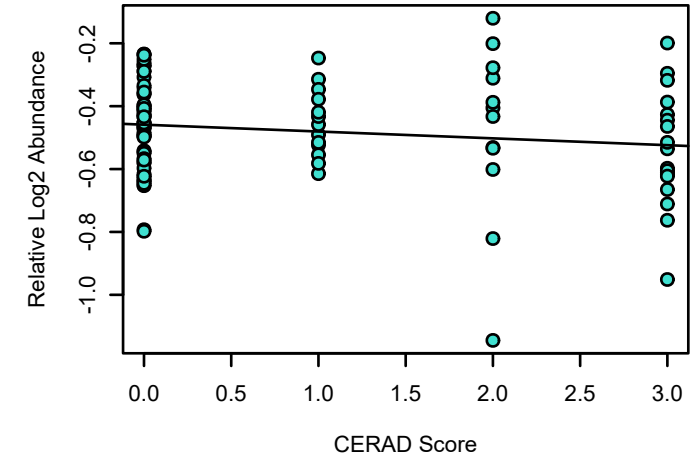

**MGLL UPenn Mixed PRM**  
M1 turquoise MEGA module member  
K-W ANOVA p: 5.4e-05

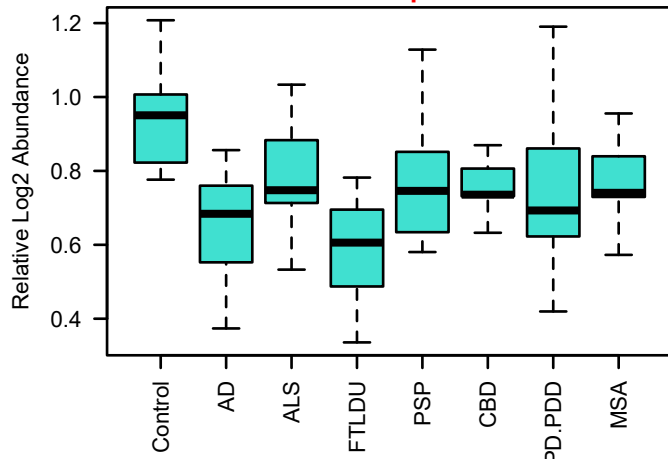

**MGLL UPenn Mixed PRM**  
K-W ANOVA p: 1.7e-05

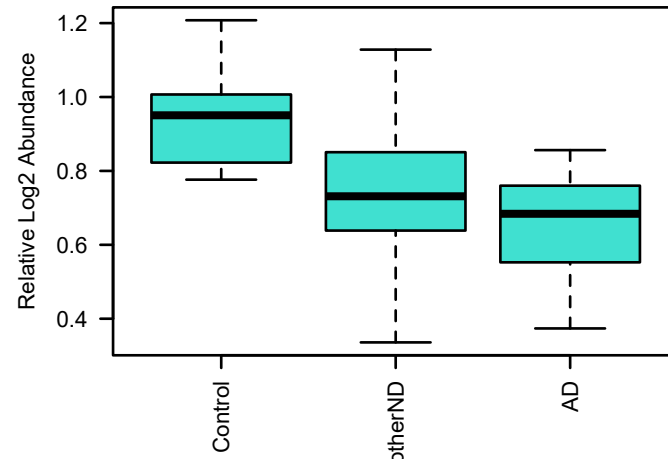

**bicor=-0.28, p=0.0091**  
**cor=-0.3, p=0.0056**

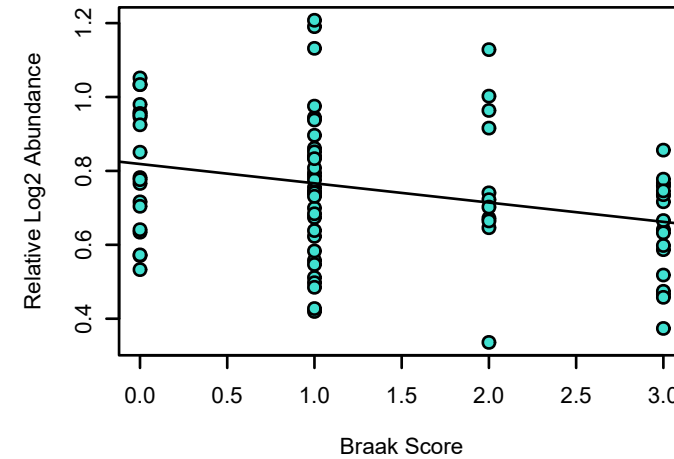

**bicor=-0.26, p=0.0092**  
**cor=-0.26, p=0.009**

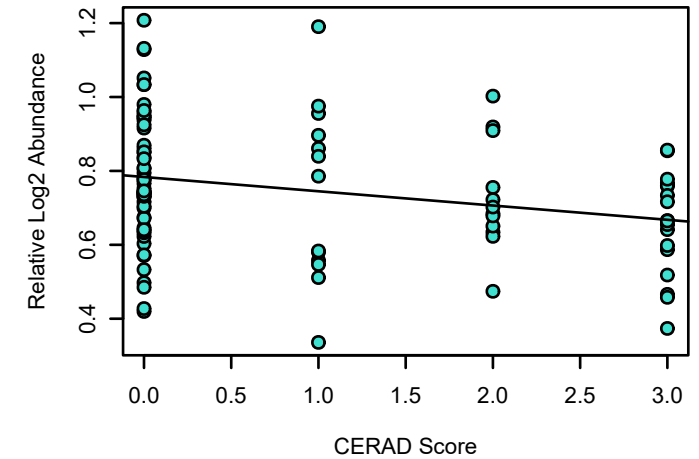

**SLC30A3 UPenn Mixed PRM**  
M1 turquoise MEGA module member  
K-W ANOVA p: 6e-06

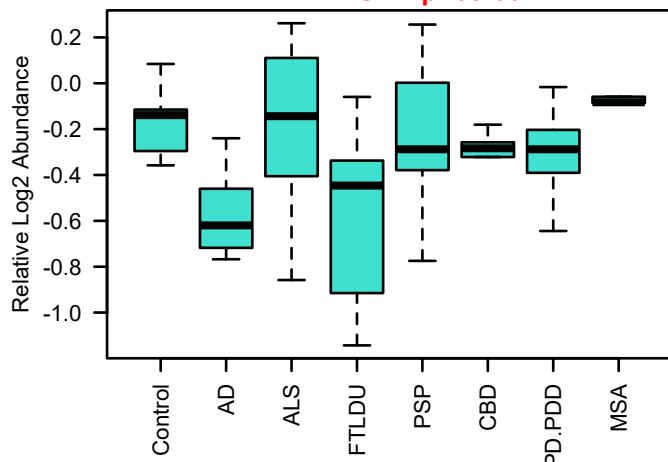

**SLC30A3 UPenn Mixed PRM**  
K-W ANOVA p: 1.7e-05

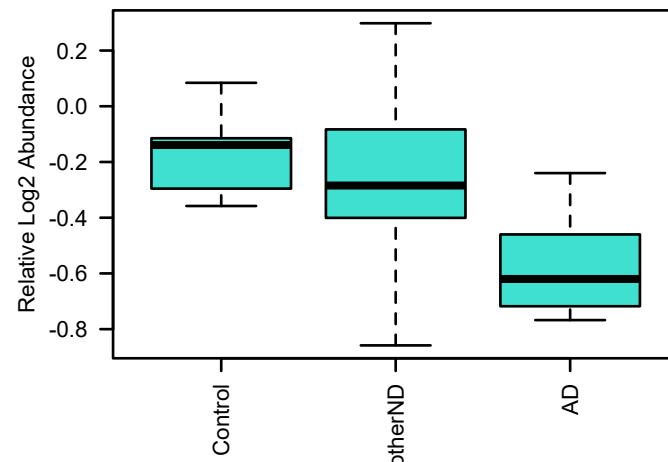

**bicor=-0.31, p=0.0047**  
**cor=-0.33, p=0.0022**

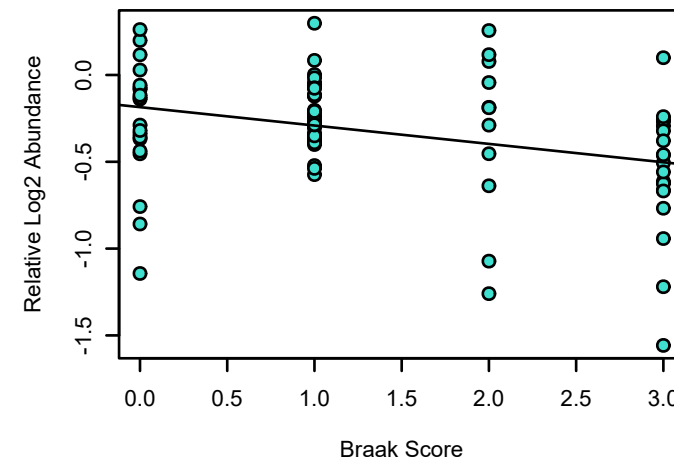

**bicor=-0.28, p=0.0042**  
**cor=-0.32, p=0.0012**

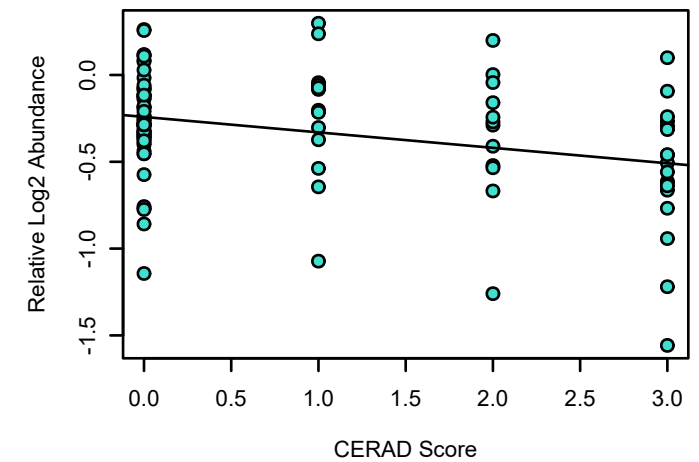

**OLFM1 UPenn Mixed PRM**  
M3 brown MEGA module member  
K-W ANOVA p: 2.2e-06

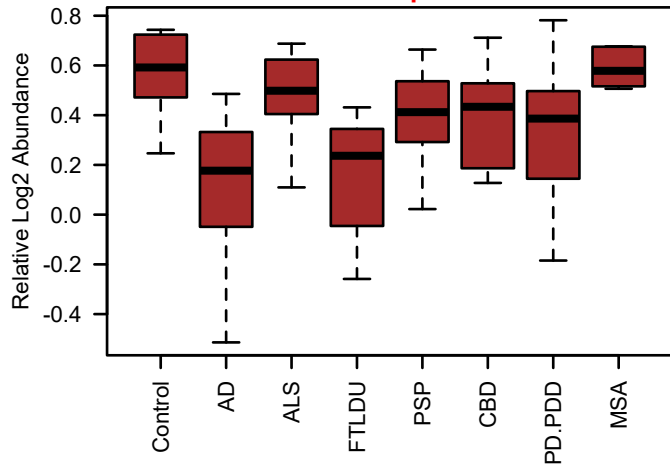

**OLFM1 UPenn Mixed PRM**  
K-W ANOVA p: 1.3e-05

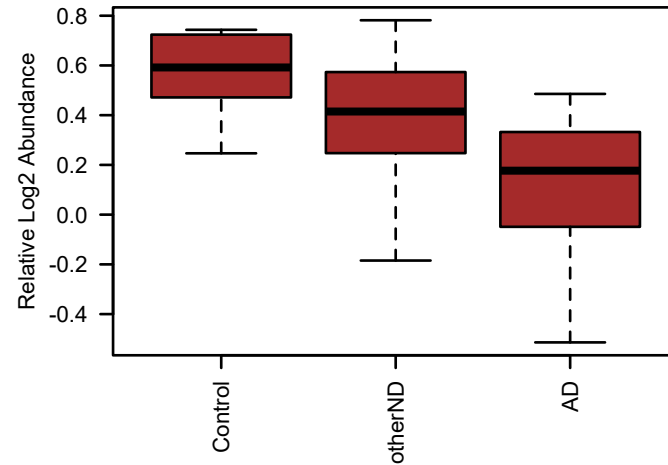

**bicor=-0.37, p=0.00053**  
**cor=-0.38, p=0.00036**

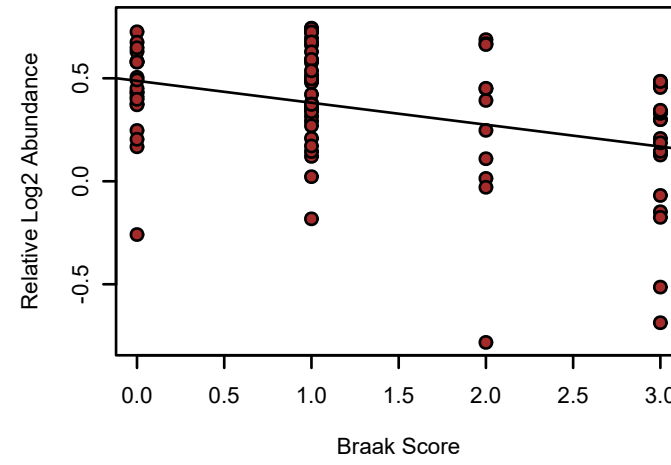

**bicor=-0.3, p=0.0021**  
**cor=-0.33, p=8e-04**

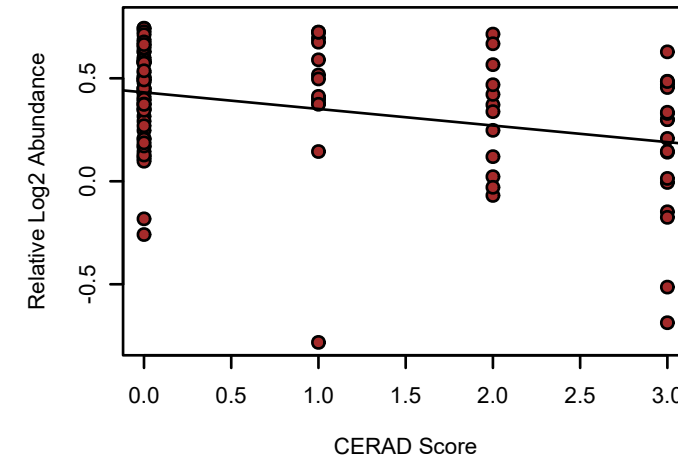

**ACO2 UPenn Mixed PRM**  
M3 brown MEGA module member  
K-W ANOVA p: 0.032

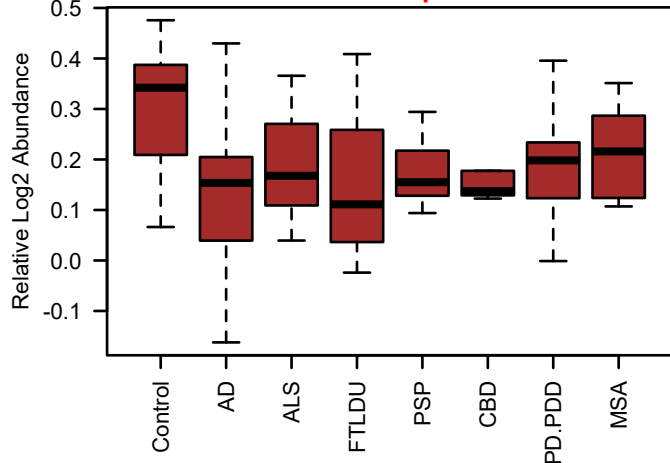

**ACO2 UPenn Mixed PRM**  
K-W ANOVA p: 0.00086

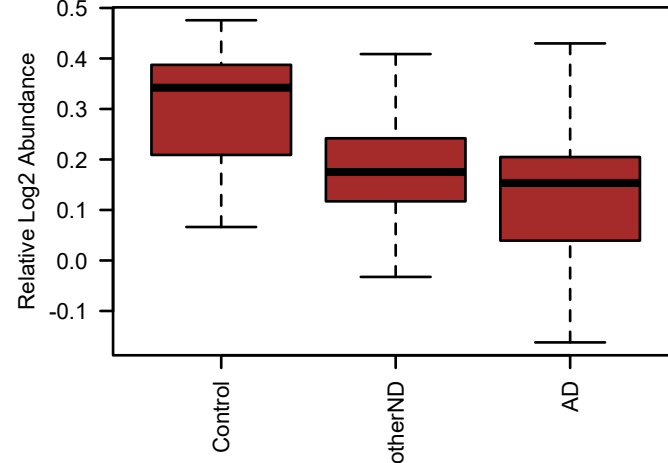

**bicor=-0.23, p=0.038**  
**cor=-0.28, p=0.0099**

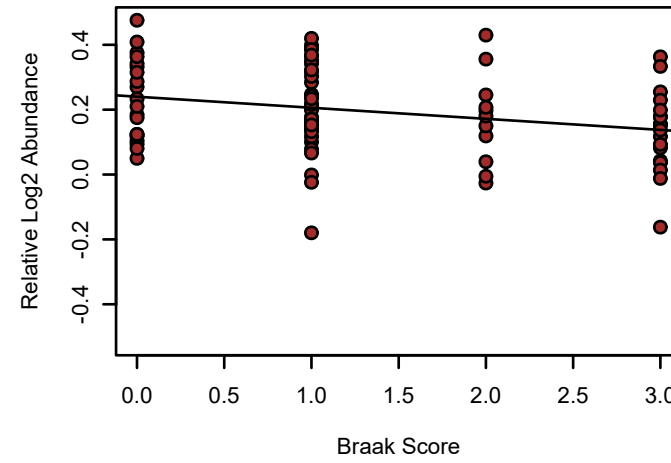

**bicor=-0.2, p=0.041**  
**cor=-0.2, p=0.046**

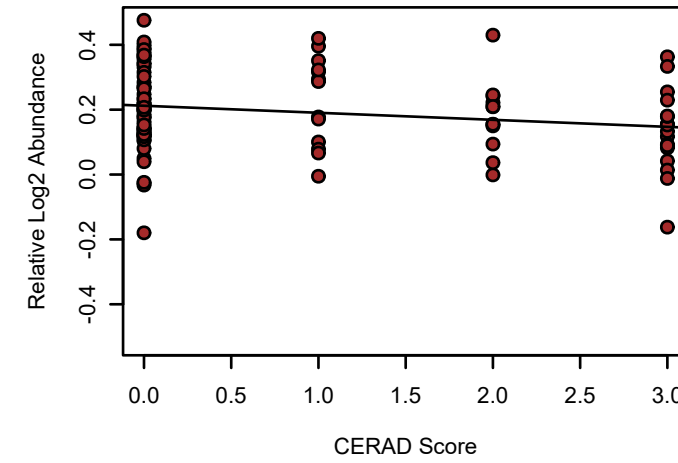

**SGIP1 UPenn Mixed PRM**  
M1 turquoise MEGA module member  
K-W ANOVA p: 0.00097

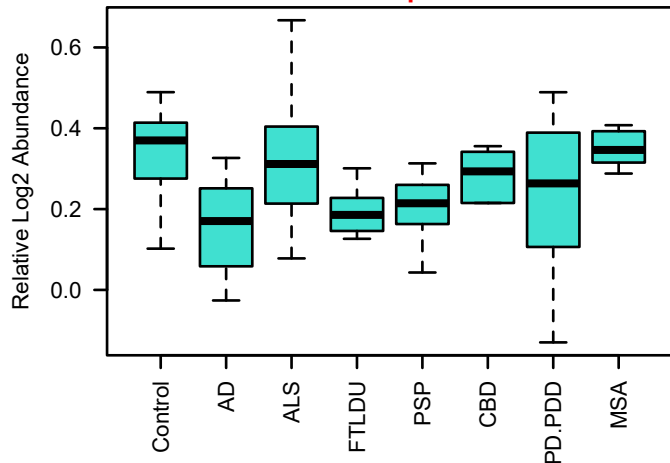

**SGIP1 UPenn Mixed PRM**  
K-W ANOVA p: 0.00022

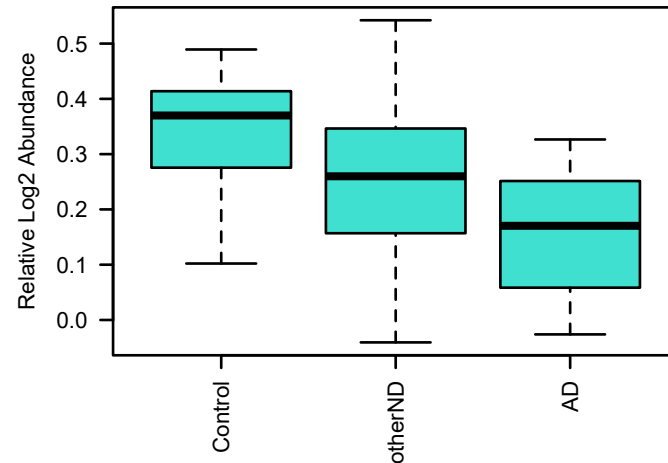

**bicor=-0.4, p=2e-04**  
**cor=-0.41, p=0.00011**

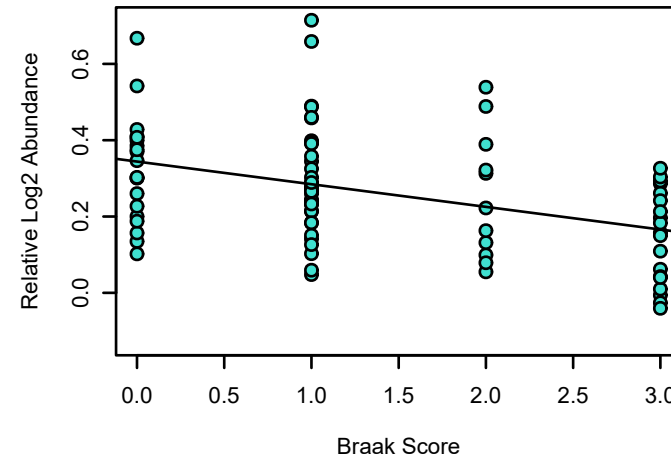

**bicor=-0.24, p=0.018**  
**cor=-0.23, p=0.021**

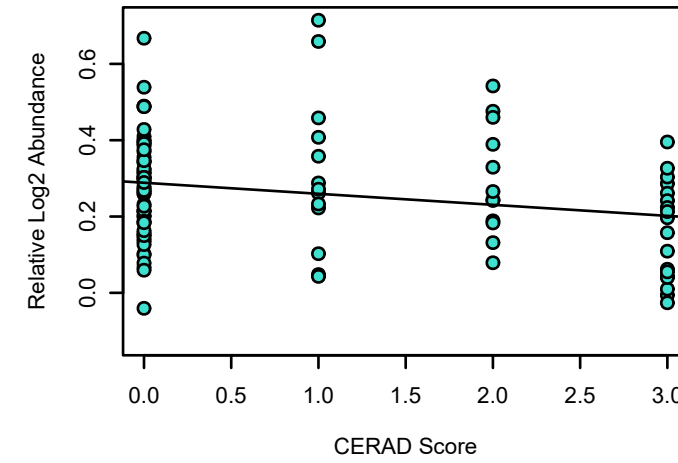

**SULT4A1 UPenn Mixed PRM**  
M12 tan MEGA module member  
K-W ANOVA p: 0.0094

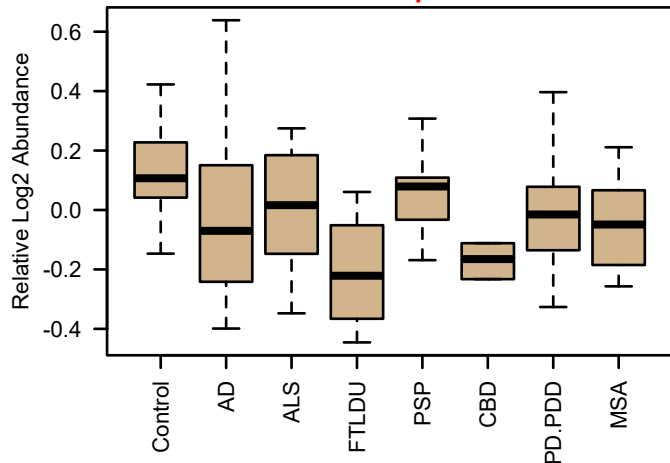

**SULT4A1 UPenn Mixed PRM**  
K-W ANOVA p: 0.073

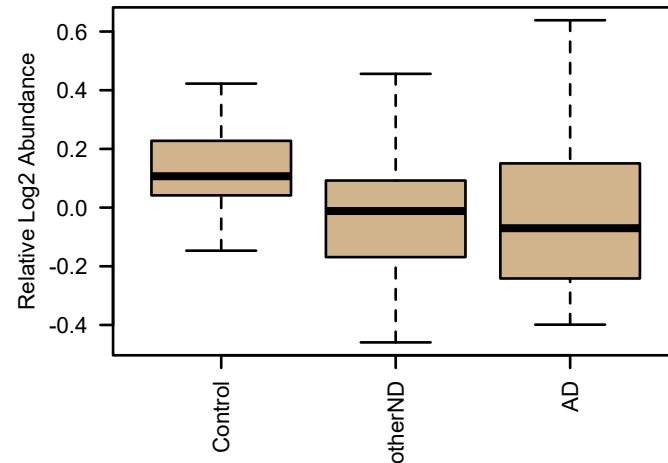

**bicor=-0.1, p=0.37**  
**cor=-0.11, p=0.32**

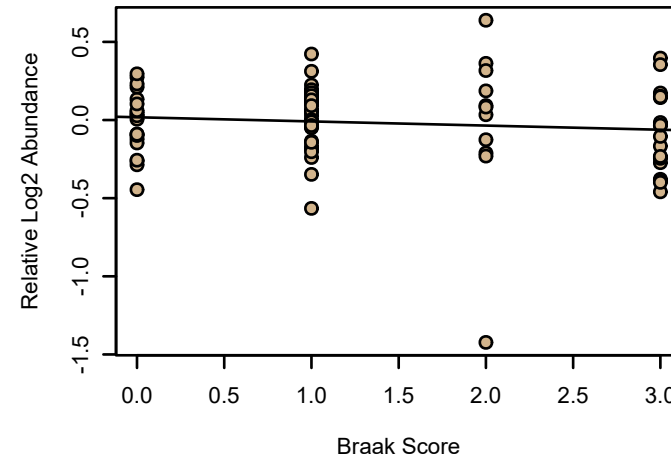

**bicor=-0.11, p=0.26**  
**cor=-0.081, p=0.42**

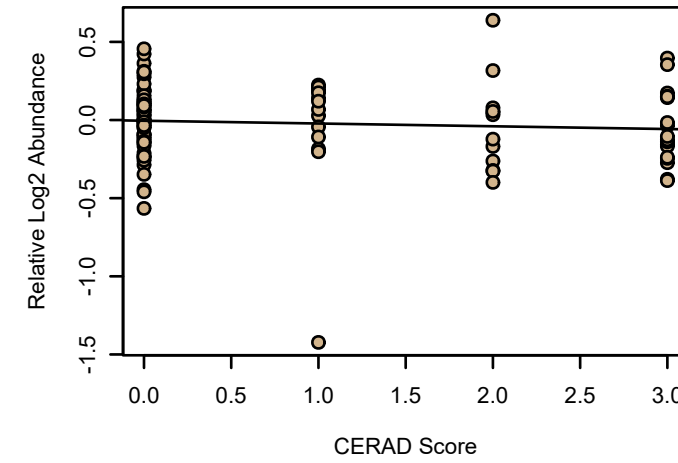

**CHCHD6 UPenn Mixed PRM**  
M1 turquoise MEGA module member  
K-W ANOVA p: 0.12

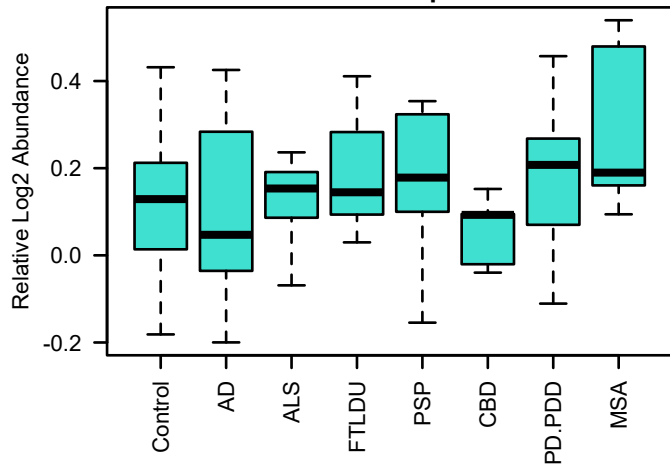

**CHCHD6 UPenn Mixed PRM**  
K-W ANOVA p: 0.061

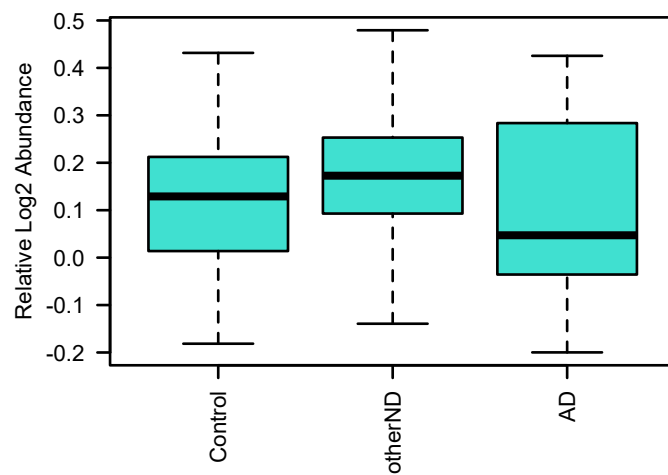

**bicor=-0.12, p=0.26**  
**cor=-0.11, p=0.32**

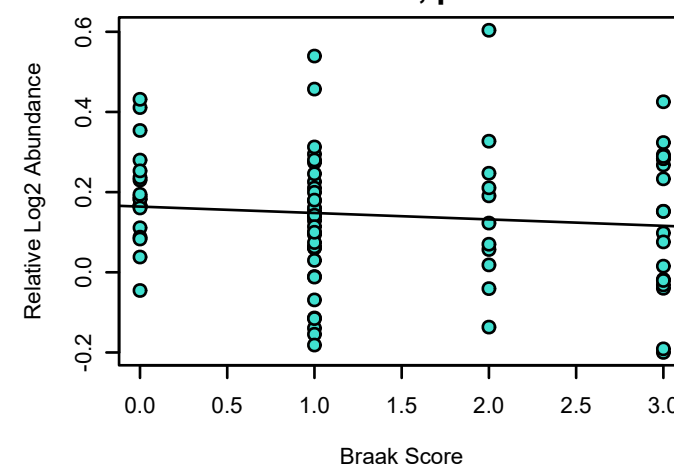

**bicor=-0.12, p=0.23**  
**cor=-0.15, p=0.14**

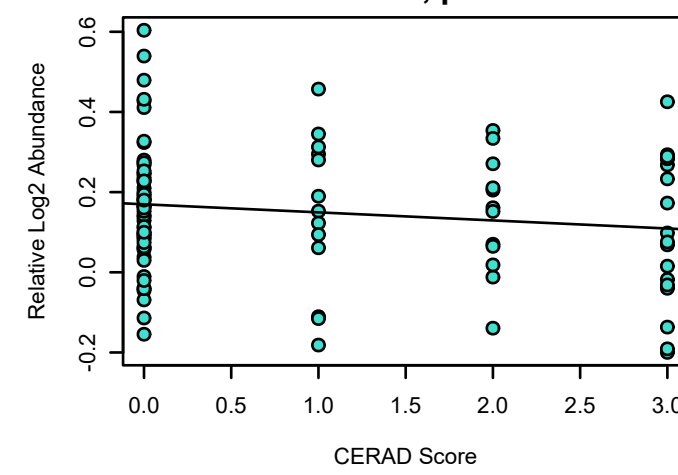

**PACSN1 UPenn Mixed PRM**  
M1 turquoise MEGA module member  
K-W ANOVA p: 1.4e-05

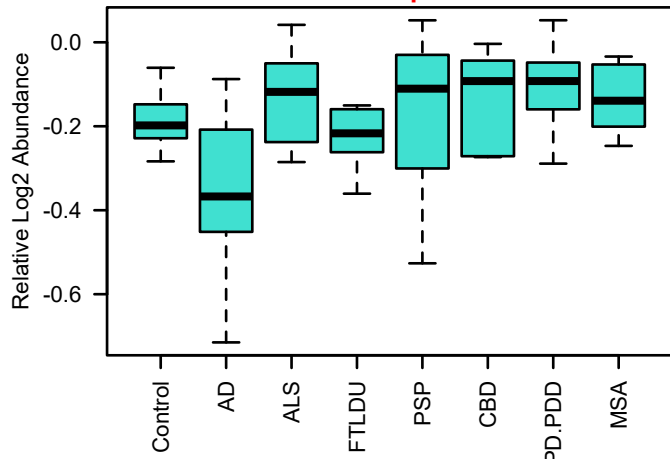

**PACSN1 UPenn Mixed PRM**  
K-W ANOVA p: 1.2e-07

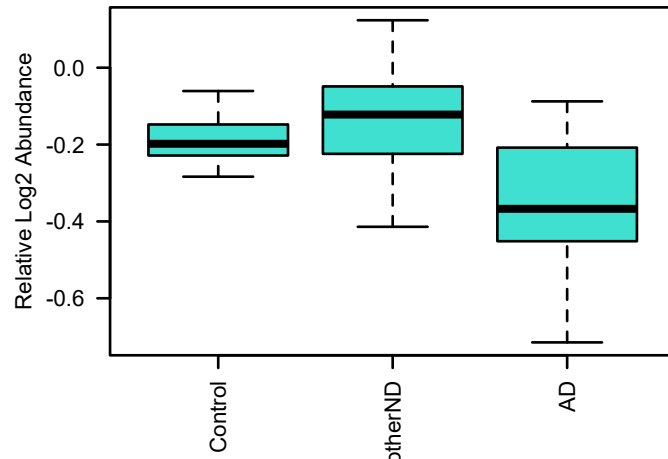

**bicor=-0.34, p=0.0016**  
**cor=-0.37, p=0.00053**

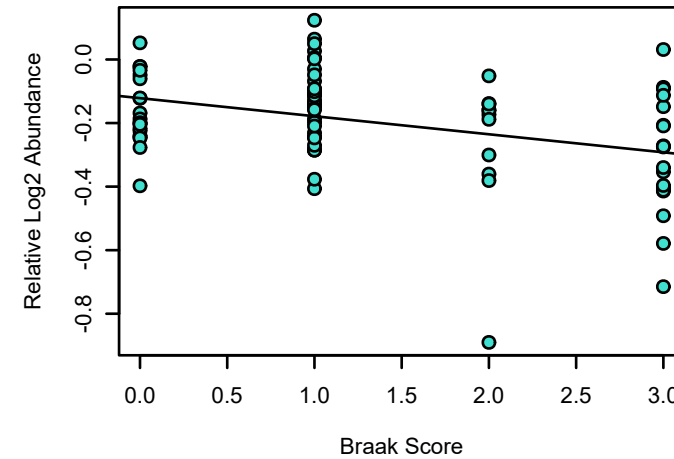

**bicor=-0.25, p=0.011**  
**cor=-0.3, p=0.0024**

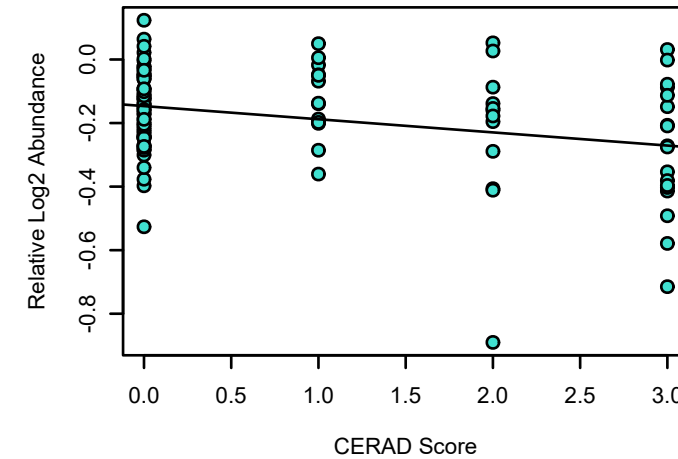

**CDC42EP4 UPenn Mixed PRM**  
NA grey MEGA module member  
K-W ANOVA p: 0.022

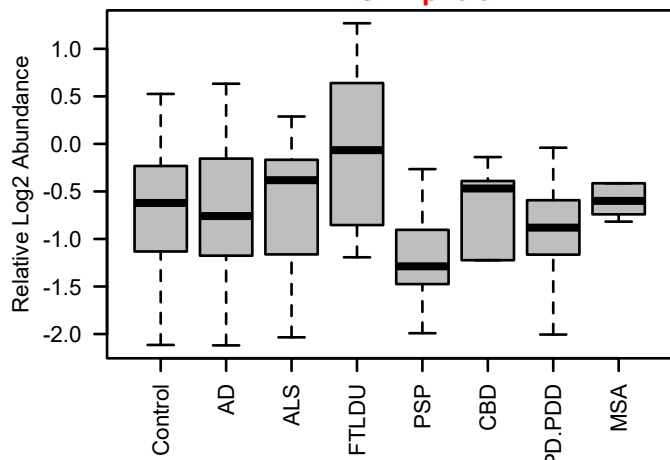

**CDC42EP4 UPenn Mixed PRM**  
K-W ANOVA p: 0.67

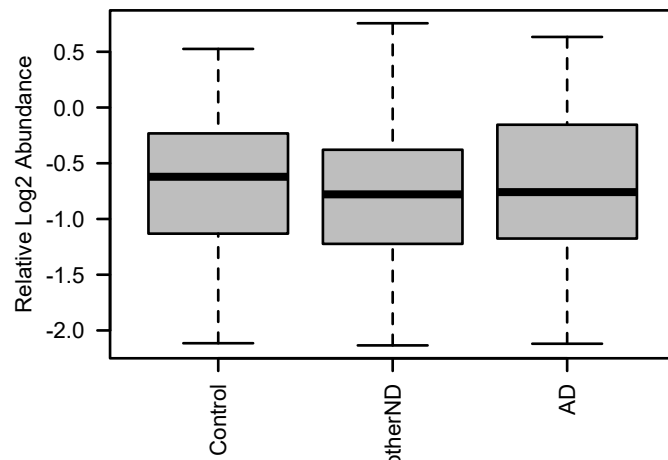

**bicor=0.0016, p=0.99**  
**cor=0.037, p=0.74**

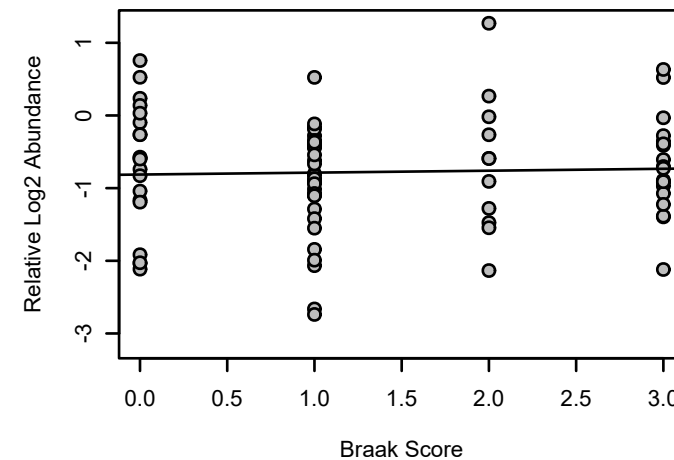

**bicor=0.036, p=0.72**  
**cor=0.052, p=0.61**

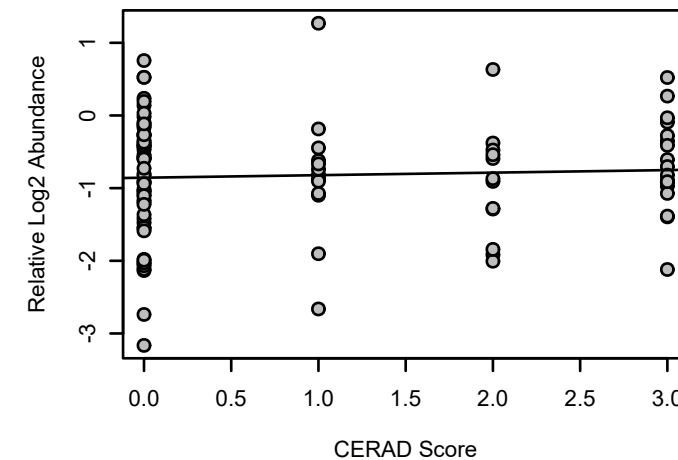

**CACYBP UPenn Mixed PRM**  
M11 greenyellow MEGA module member  
K-W ANOVA p: 0.0077

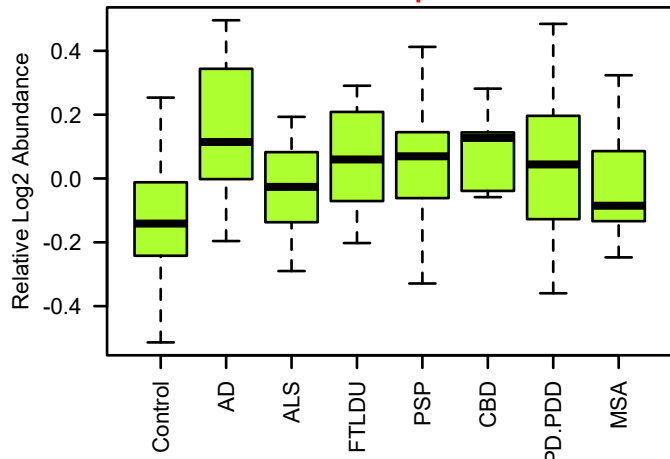

**CACYBP UPenn Mixed PRM**  
K-W ANOVA p: 0.00024

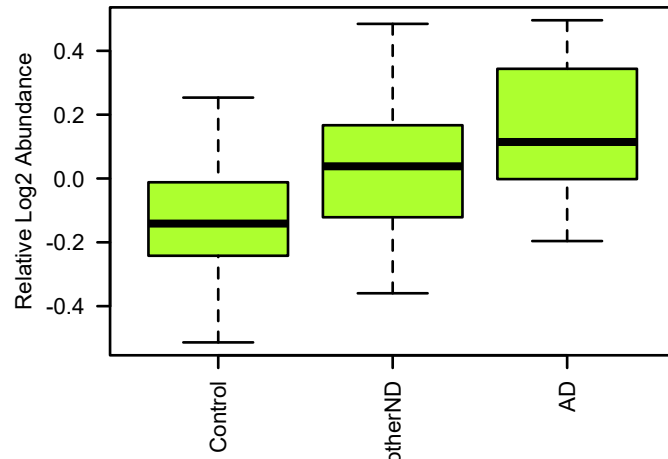

**bicor=0.33, p=0.002**  
**cor=0.34, p=0.0016**

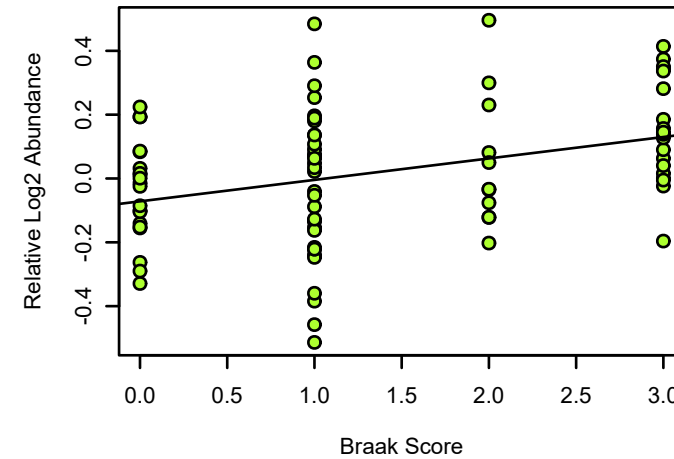

**bicor=0.13, p=0.19**  
**cor=0.13, p=0.2**

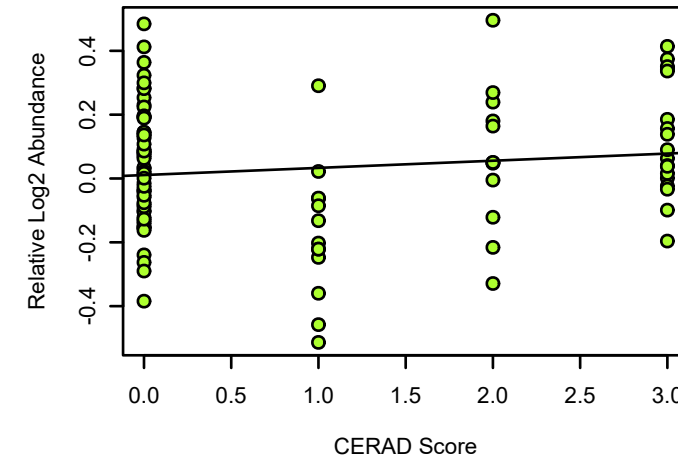

**VAT1L UPenn Mixed PRM**  
M1 turquoise MEGA module member  
K-W ANOVA p: 0.19

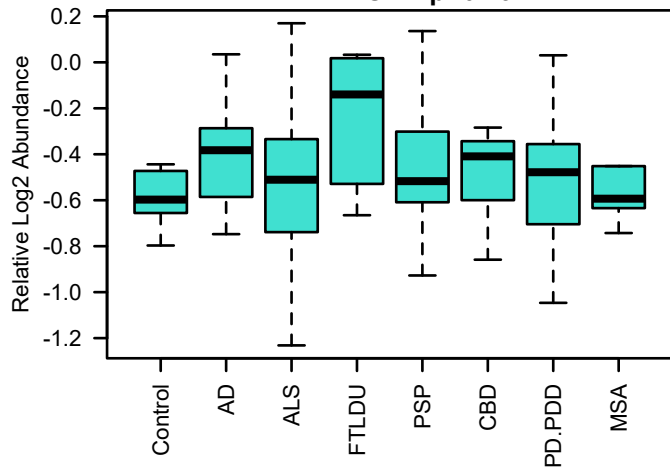

**VAT1L UPenn Mixed PRM**  
K-W ANOVA p: 0.42

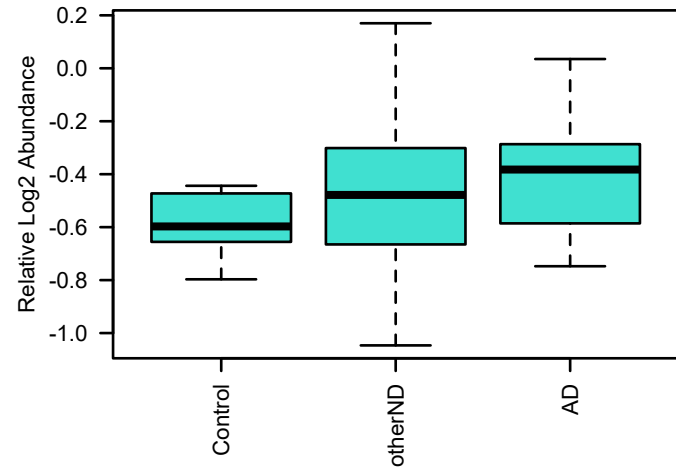

**bicor=0.15, p=0.18**  
**cor=0.13, p=0.24**

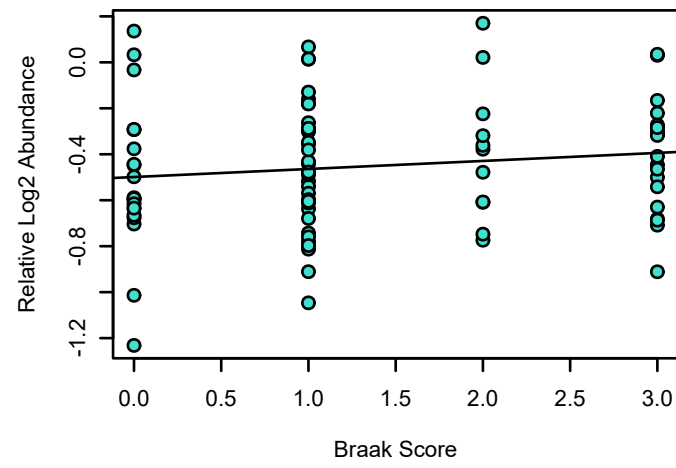

**bicor=0.14, p=0.18**  
**cor=0.13, p=0.2**

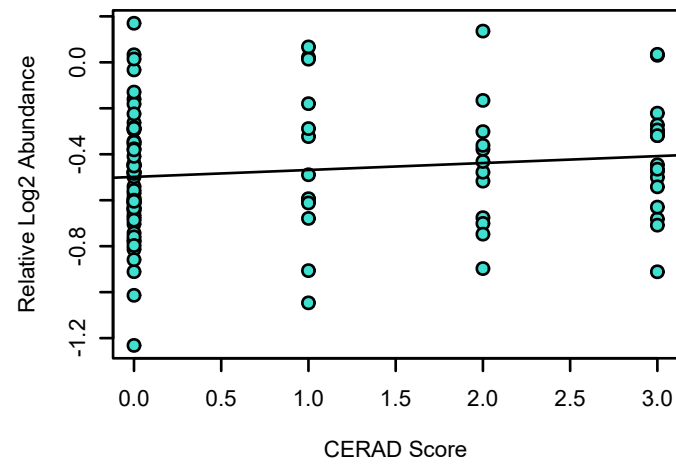

**PLCB1 UPenn Mixed PRM**  
M3 brown MEGA module member  
K-W ANOVA p: 4.3e-05

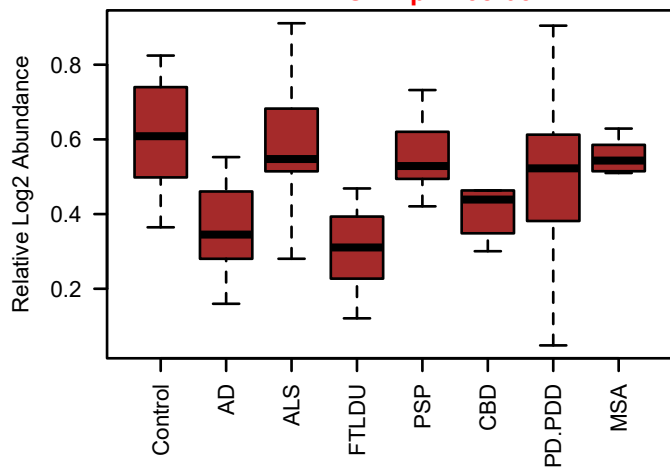

**PLCB1 UPenn Mixed PRM**  
K-W ANOVA p: 0.00045

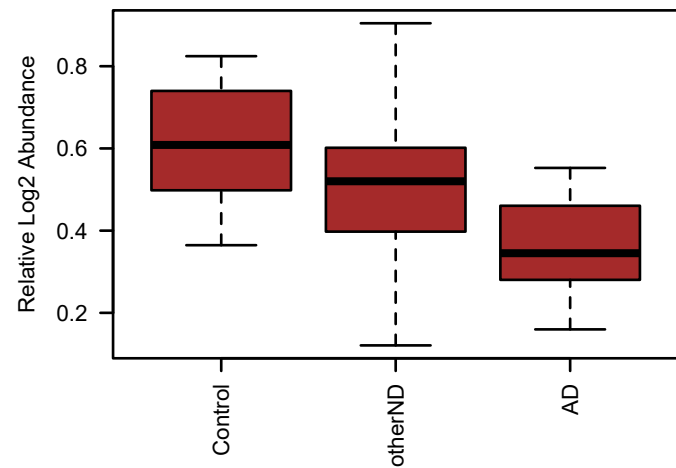

**bicor=-0.37, p=0.00056**  
**cor=-0.36, p=0.00077**

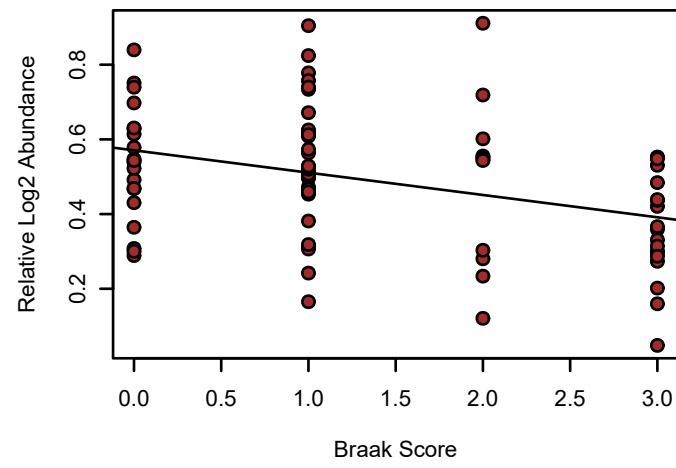

**bicor=-0.39, p=7.6e-05**  
**cor=-0.39, p=6e-05**

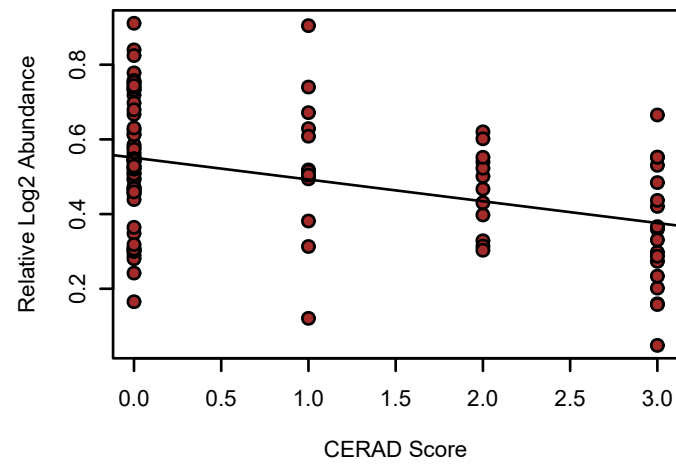

**RTN4 UPenn Mixed PRM**  
M6 red MEGA module member  
K-W ANOVA p: 0.28

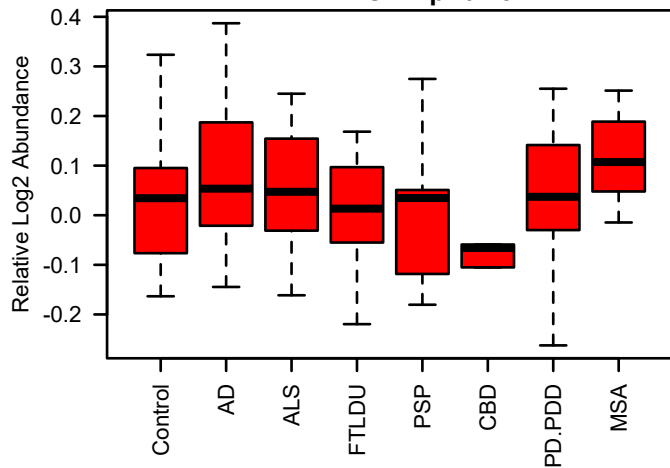

**RTN4 UPenn Mixed PRM**  
K-W ANOVA p: 0.39

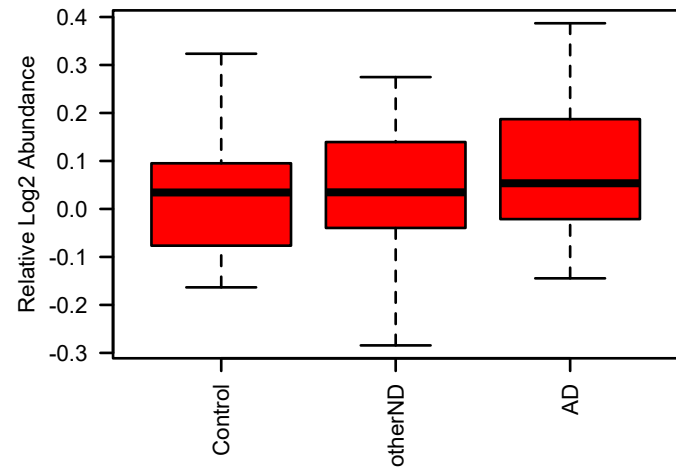

**bicor=0.062, p=0.57**  
**cor=0.08, p=0.47**

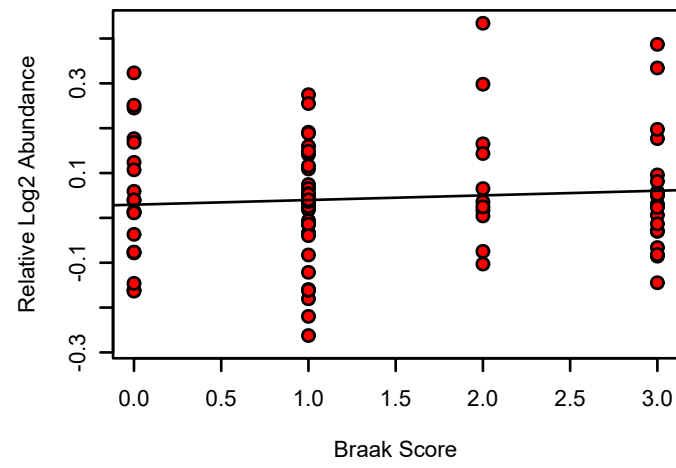

**bicor=0.085, p=0.4**  
**cor=0.1, p=0.32**

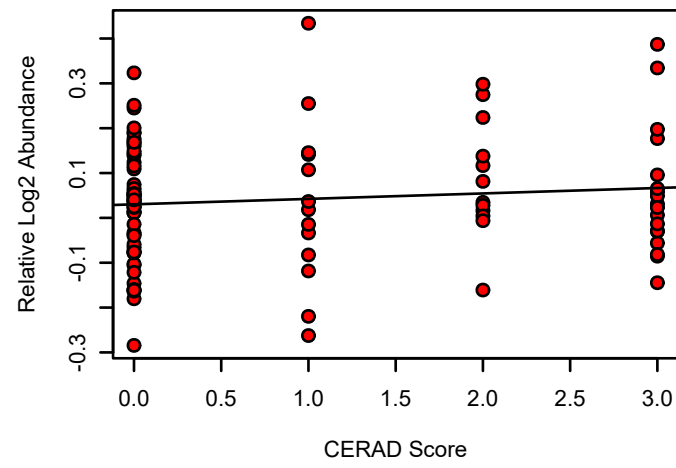

**GPHN UPenn Mixed PRM**  
M1 turquoise MEGA module member  
K-W ANOVA p: 2.8e-06

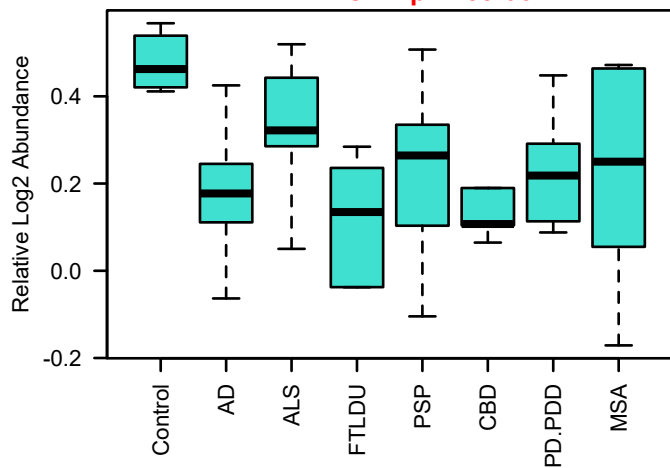

**GPHN UPenn Mixed PRM**  
K-W ANOVA p: 1.3e-05

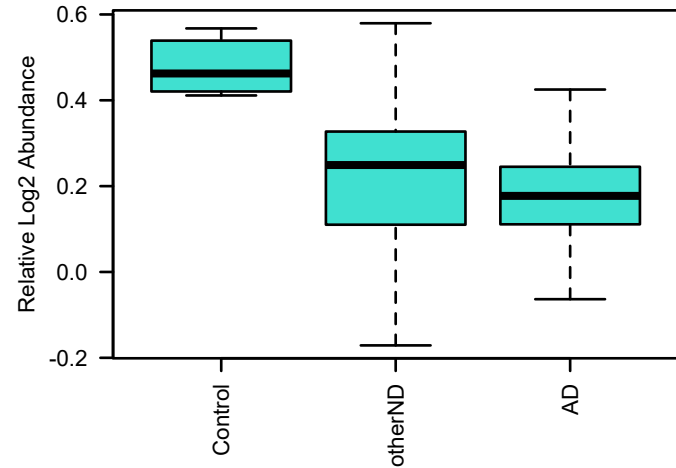

**bicor=-0.23, p=0.037**  
**cor=-0.25, p=0.022**

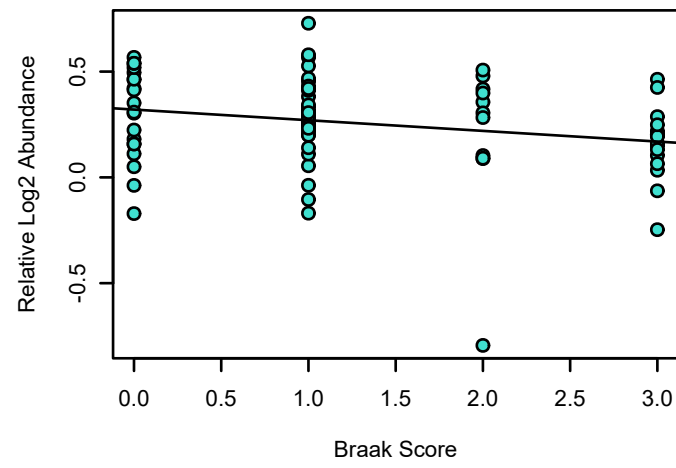

**bicor=-0.27, p=0.0061**  
**cor=-0.24, p=0.016**

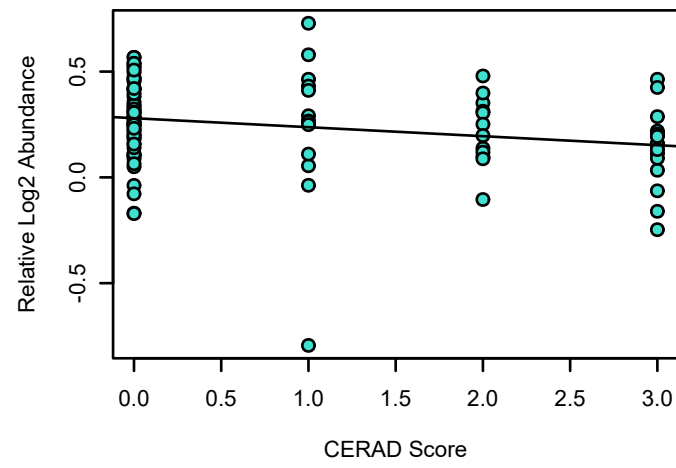



**LANCL2 UPenn Mixed PRM**  
M1 turquoise MEGA module member  
K-W ANOVA p: 0.13

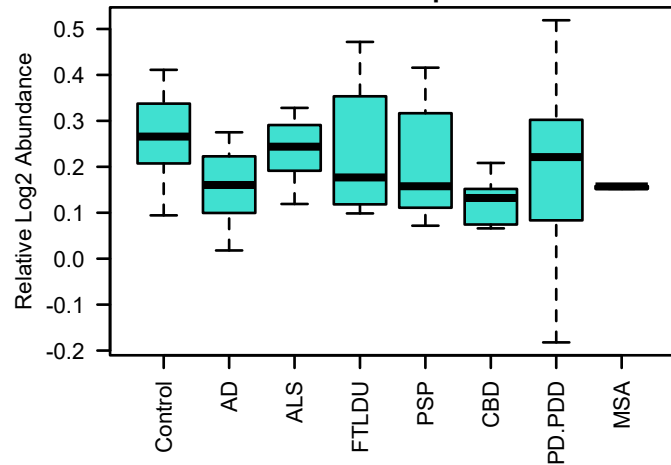

**LANCL2 UPenn Mixed PRM**  
K-W ANOVA p: 0.064

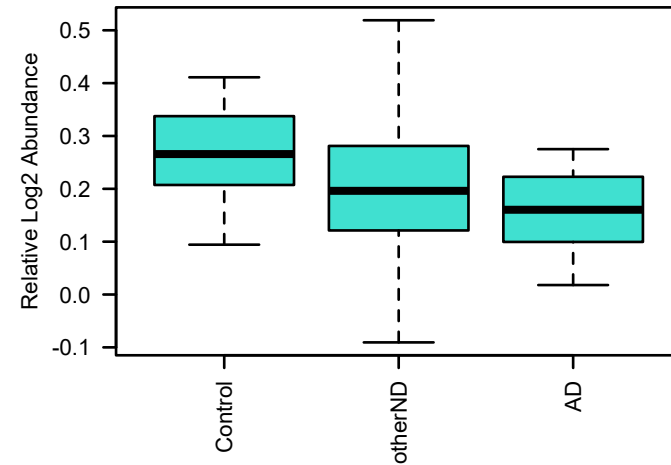

**bicor=-0.25, p=0.021**  
**cor=-0.27, p=0.013**

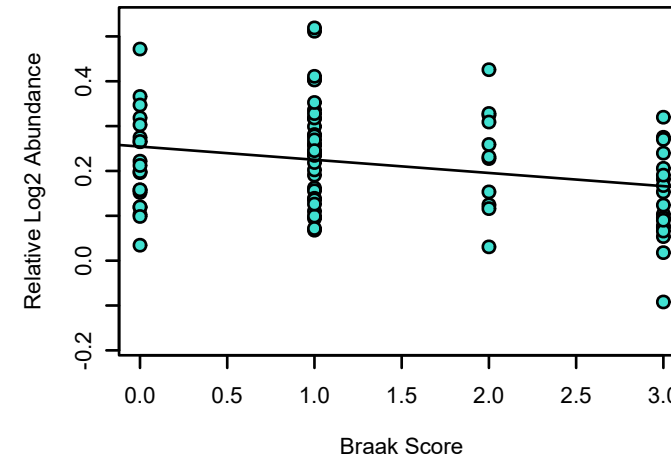

**bicor=-0.21, p=0.038**  
**cor=-0.23, p=0.021**

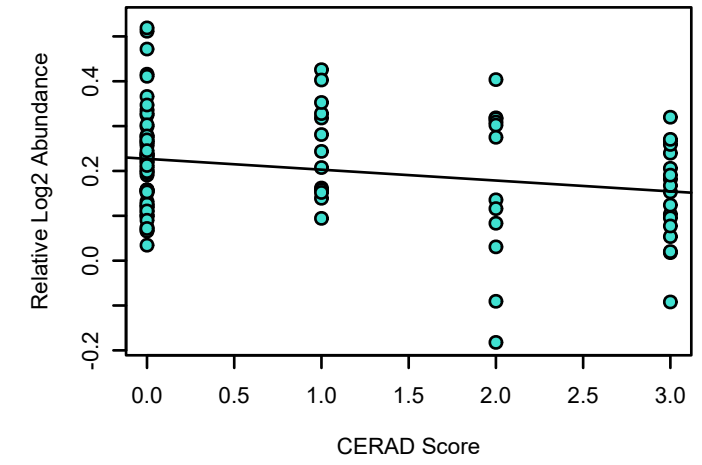

**FARSB UPenn Mixed PRM**  
M1 turquoise MEGA module member  
K-W ANOVA p: 2.2e-09

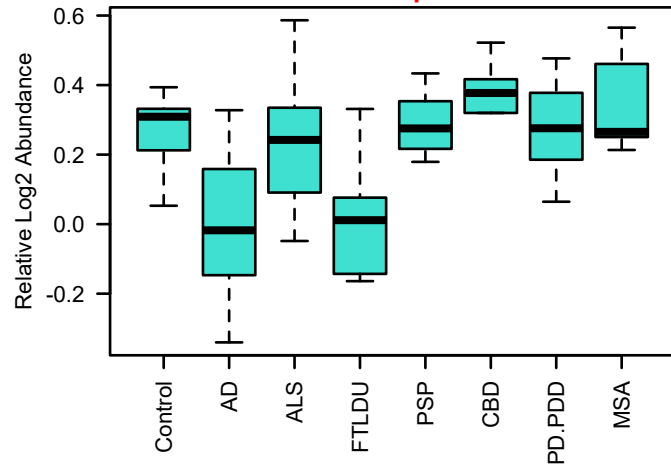

**FARSB UPenn Mixed PRM**  
K-W ANOVA p: 7e-06

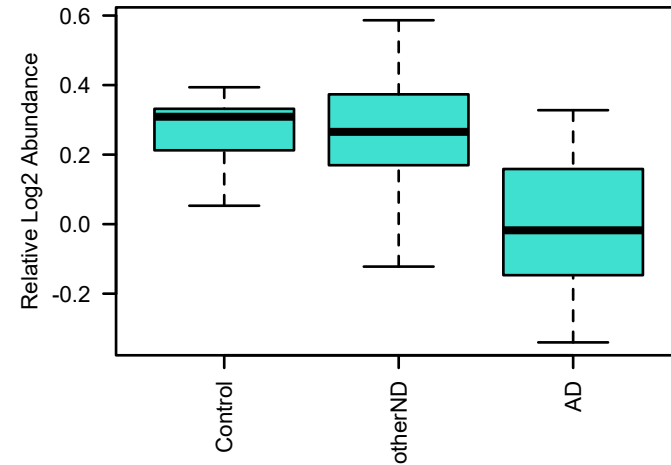

**bicor=-0.22, p=0.041**  
**cor=-0.28, p=0.0099**

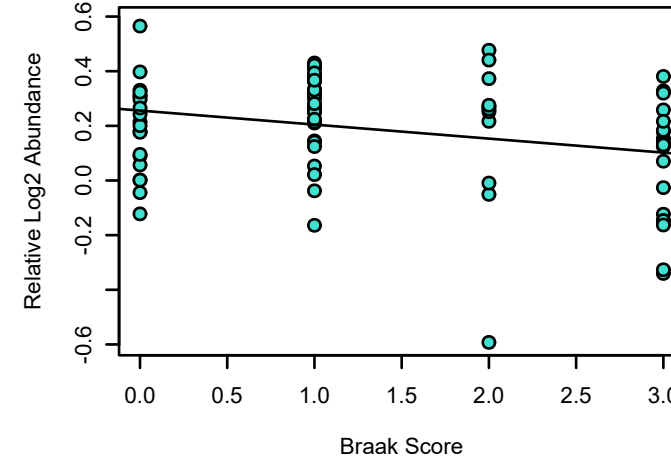

**bicor=-0.3, p=0.0022**  
**cor=-0.32, p=0.0012**

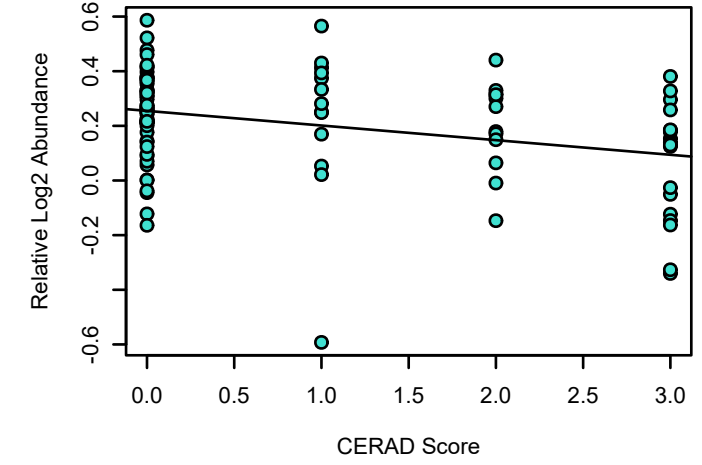

**TMEM30A UPenn Mixed PRM**  
NA grey MEGA module member  
K-W ANOVA p: 0.00027

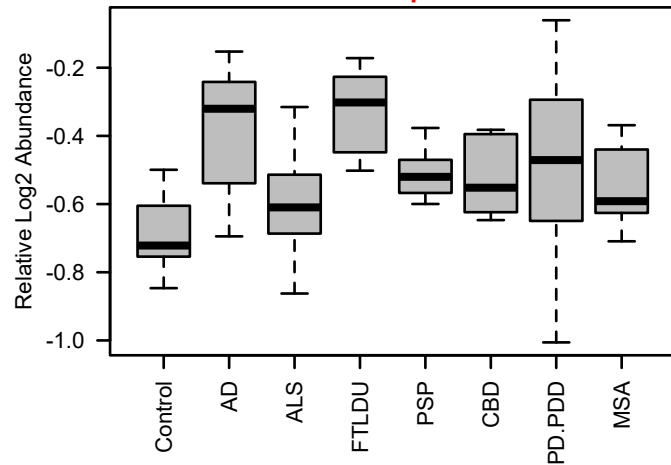

**TMEM30A UPenn Mixed PRM**  
K-W ANOVA p: 5.4e-05

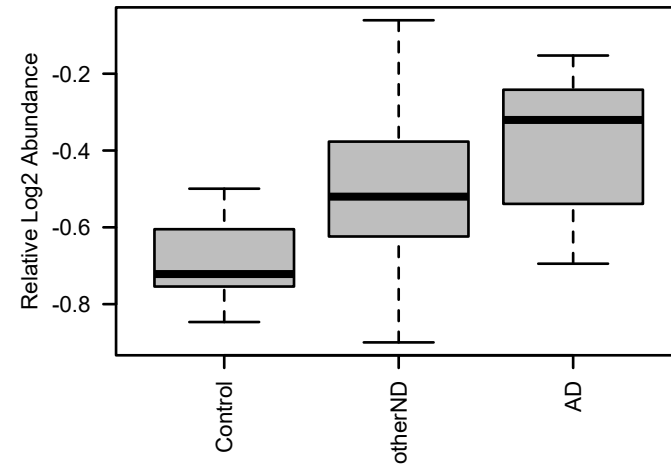

**bicor=0.43, p=4e-05**  
**cor=0.42, p=7e-05**

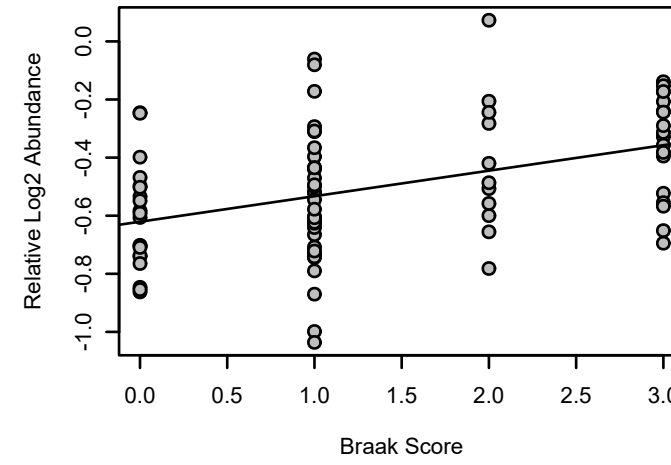

**bicor=0.35, p=0.00037**  
**cor=0.33, p=8e-04**

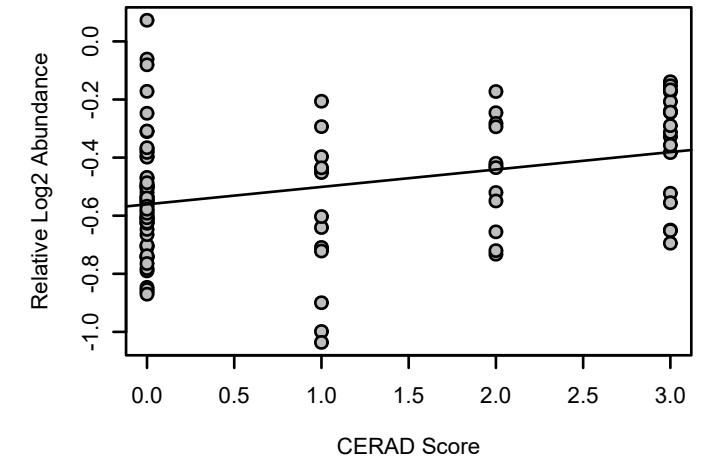

**NDUFB11 UPenn Mixed PRM**  
M3 brown MEGA module member  
K-W ANOVA p: 0.0033

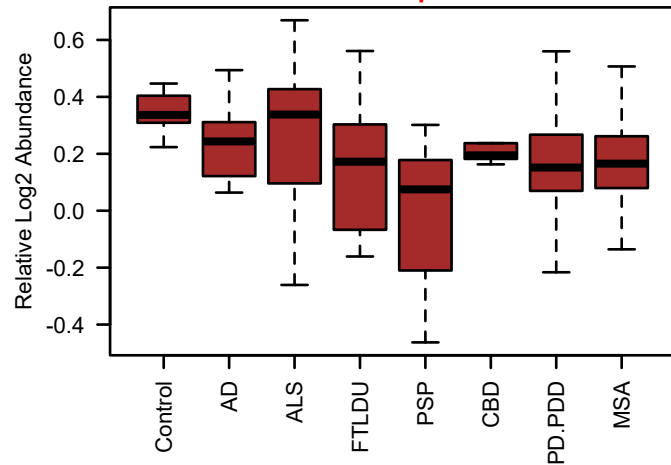

**NDUFB11 UPenn Mixed PRM**  
K-W ANOVA p: 0.0067

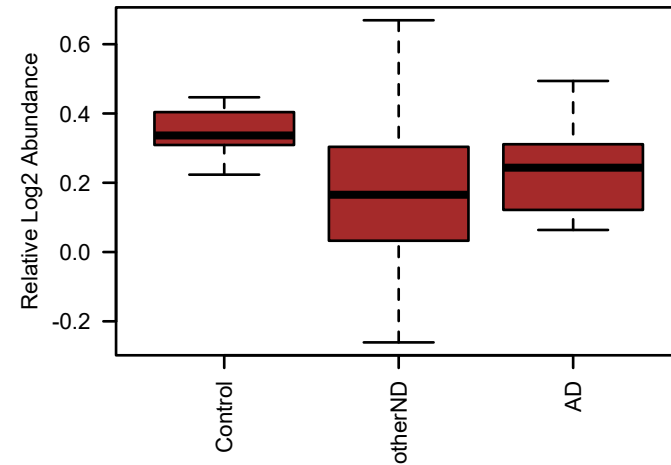

**bicor=-0.22, p=0.044**  
**cor=-0.19, p=0.083**

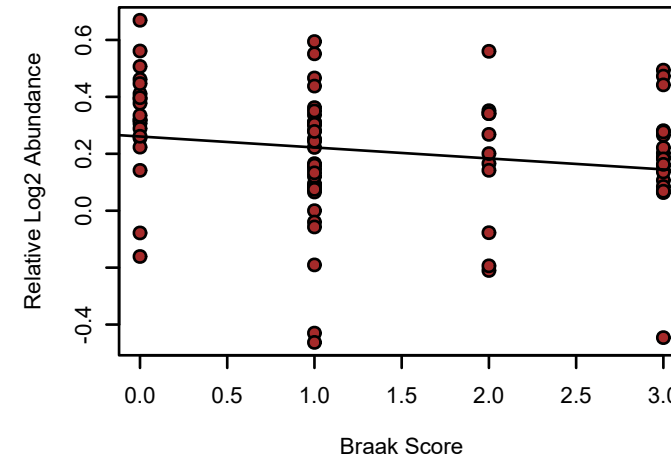

**bicor=-0.024, p=0.81**  
**cor=0.0071, p=0.94**

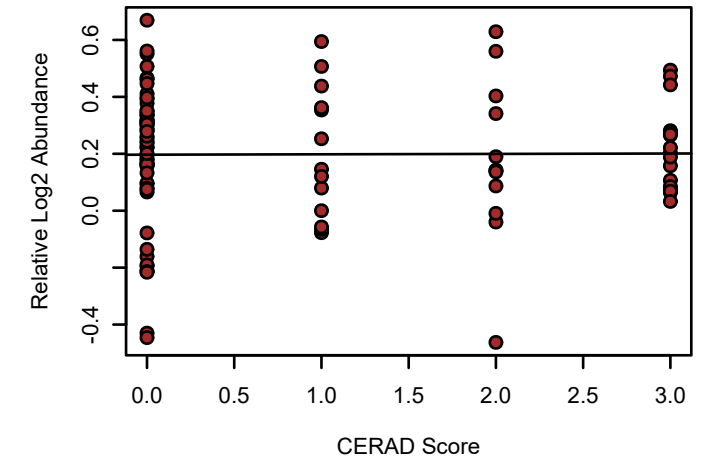

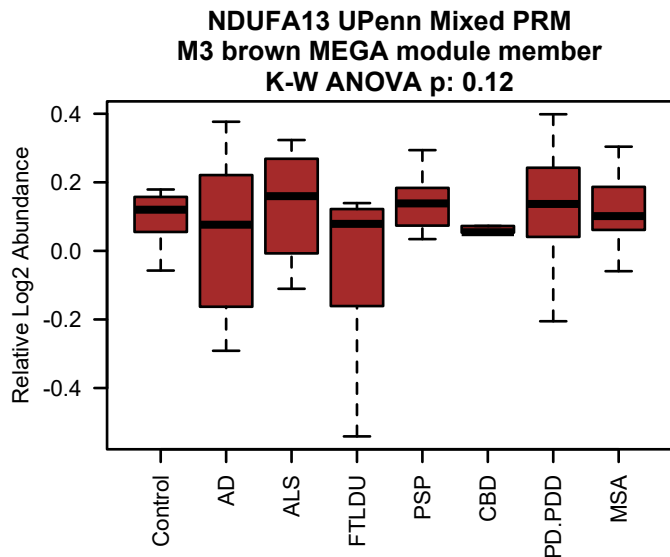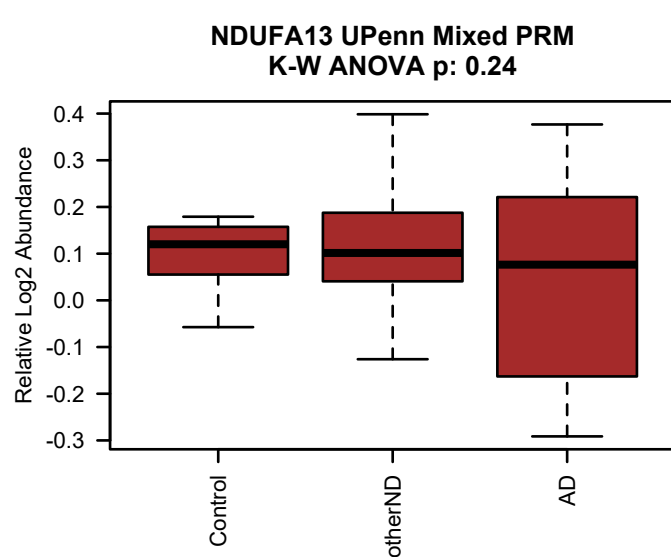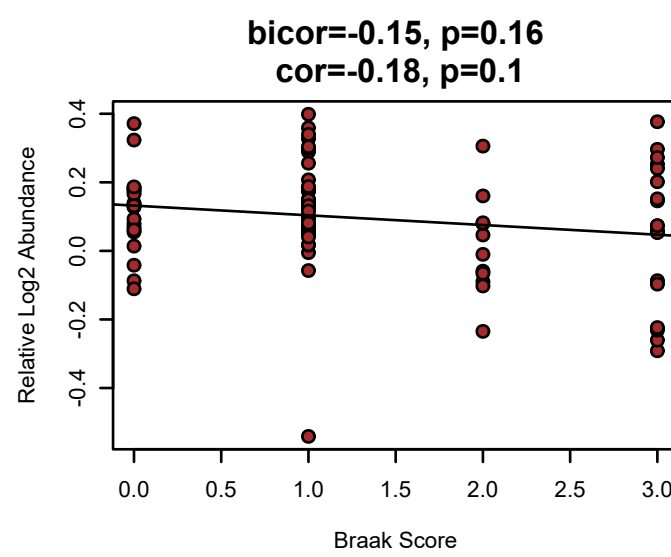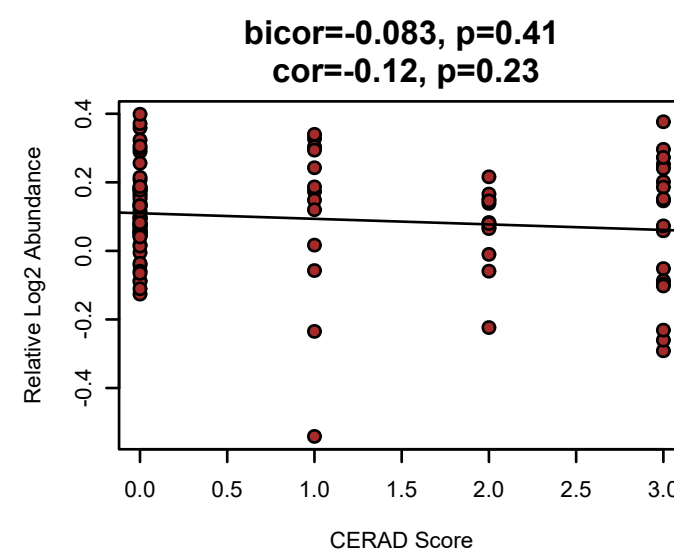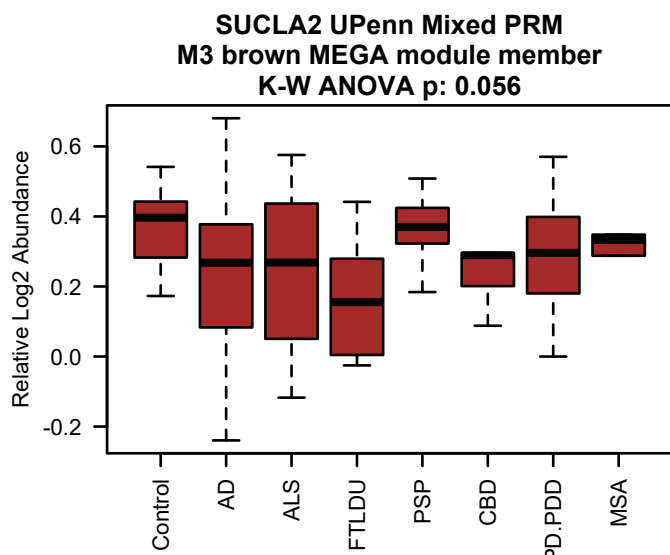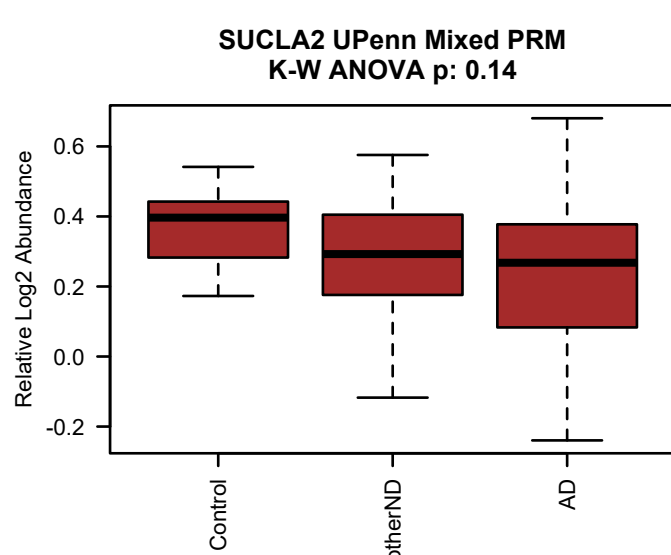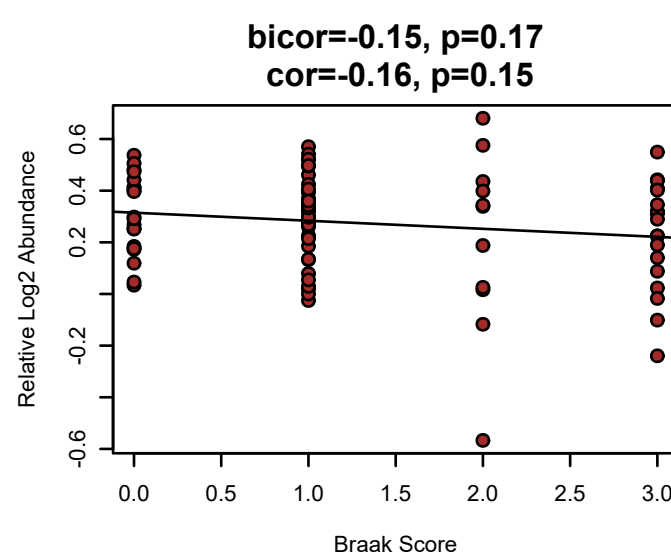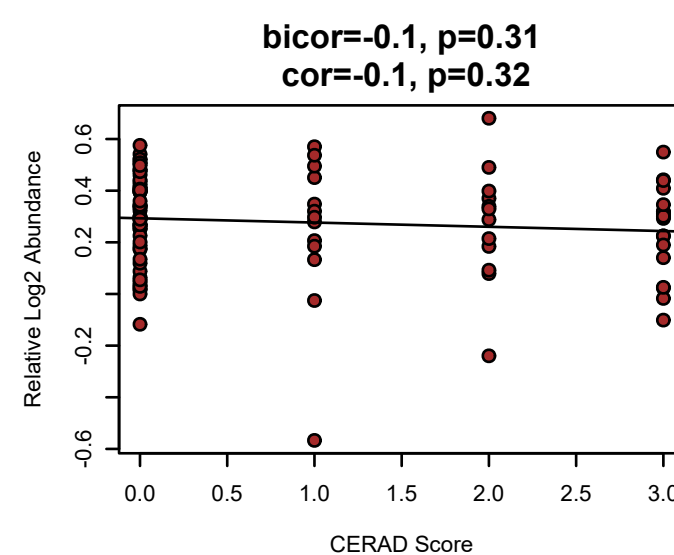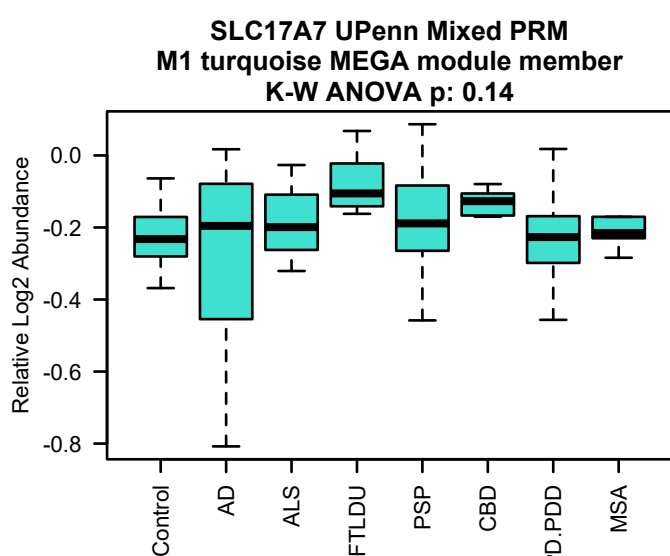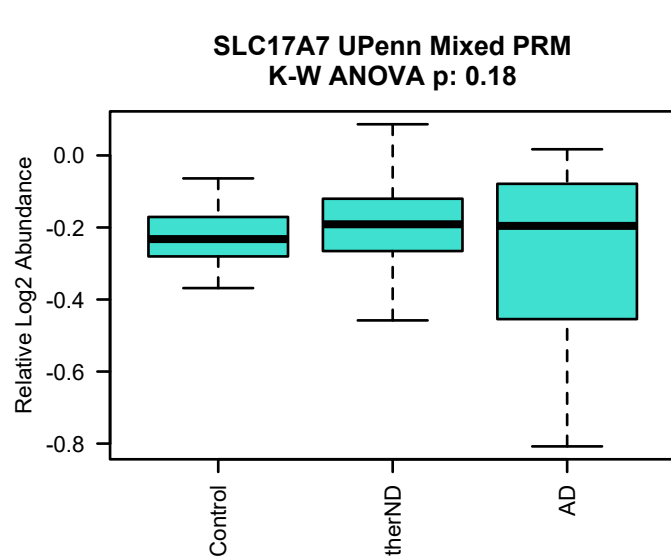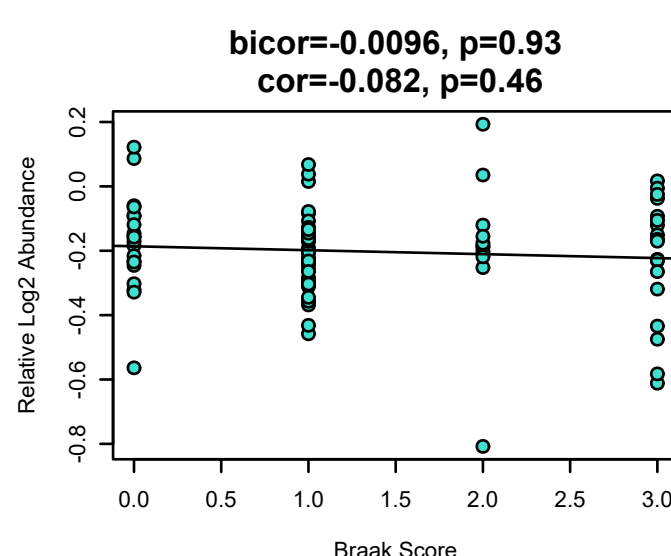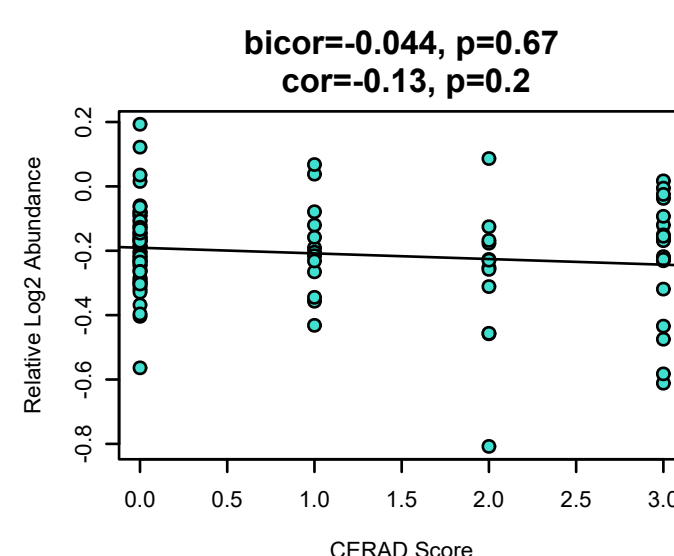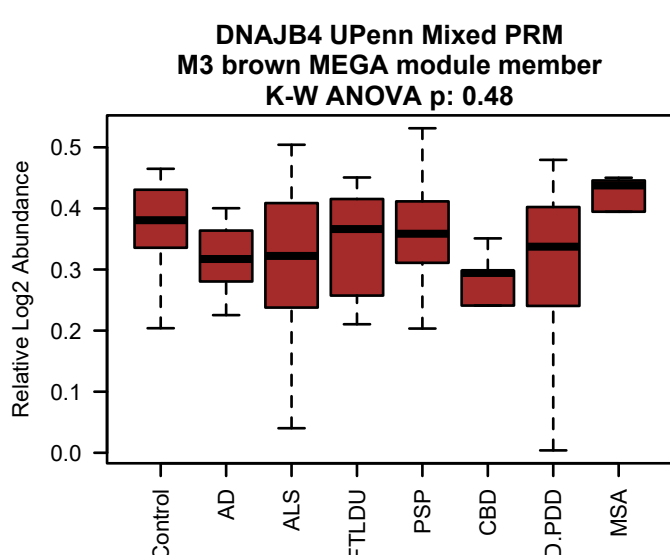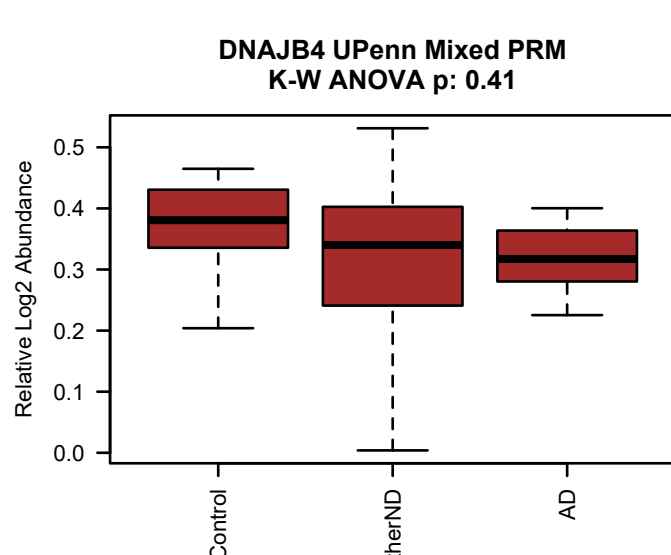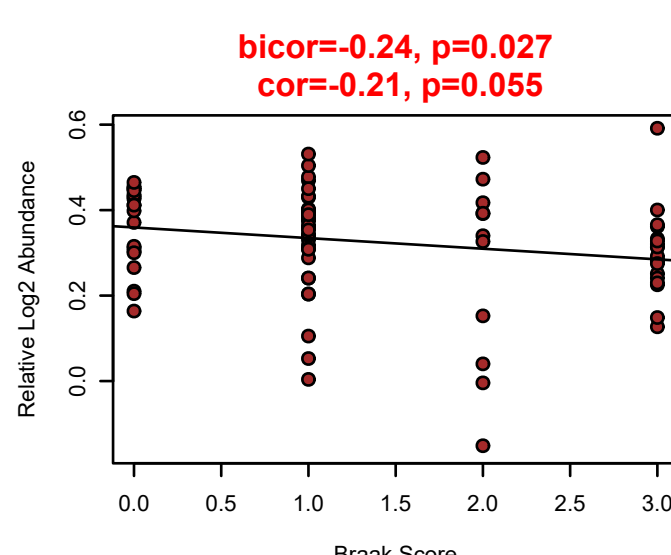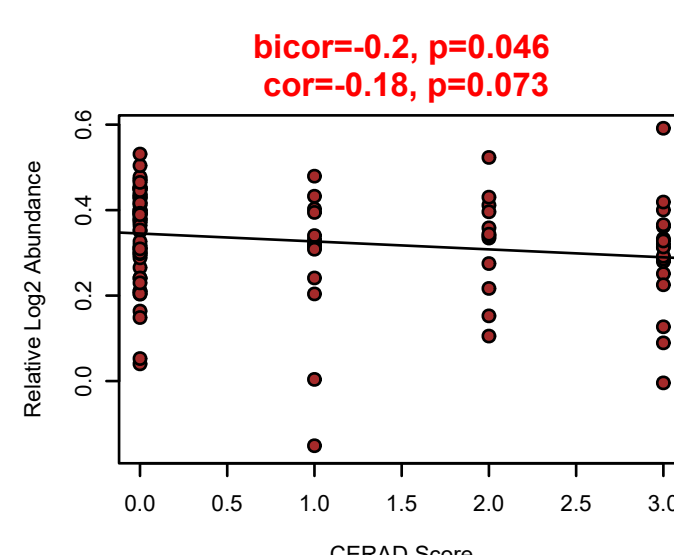

**SEPT1 UPenn Mixed PRM**  
NA grey20 MEGA module member  
K-W ANOVA p: 0.28

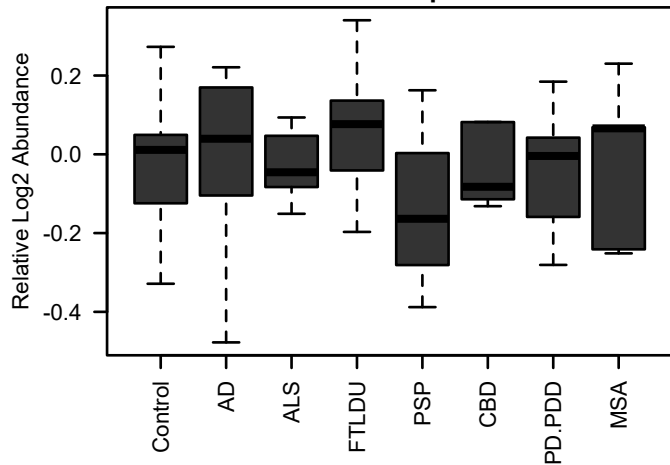

**SEPT1 UPenn Mixed PRM**  
K-W ANOVA p: 0.57

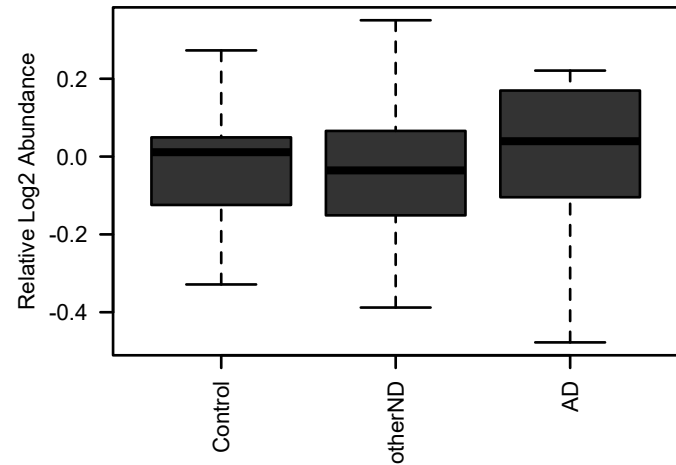

**bicor=0.016, p=0.89**  
**cor=0.05, p=0.65**

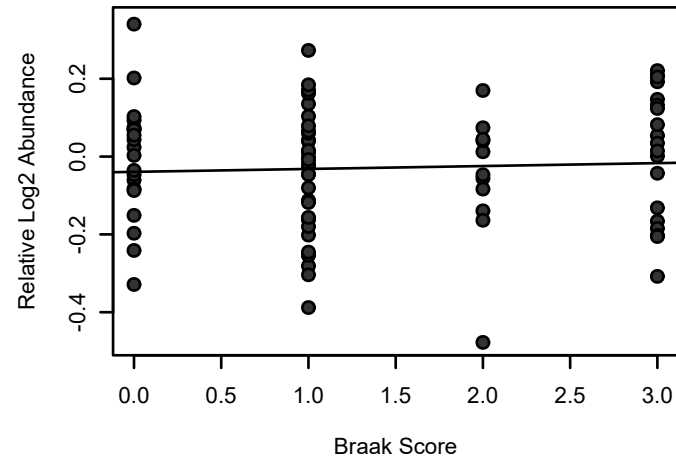

**bicor=0.12, p=0.23**  
**cor=0.094, p=0.35**

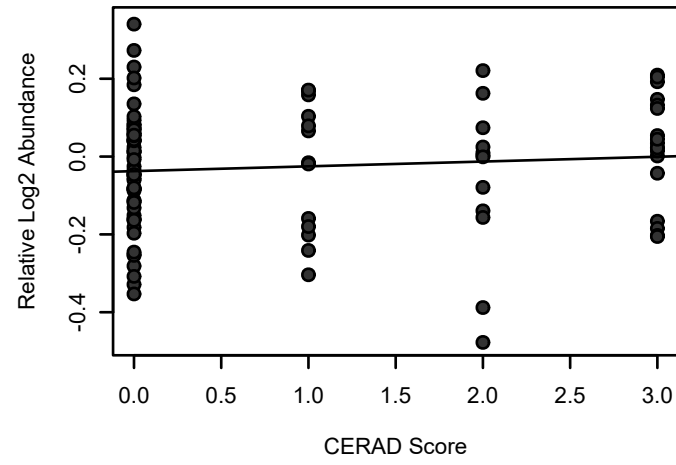

**SEPT3 UPenn Mixed PRM**  
M1 turquoise MEGA module member  
K-W ANOVA p: 0.43

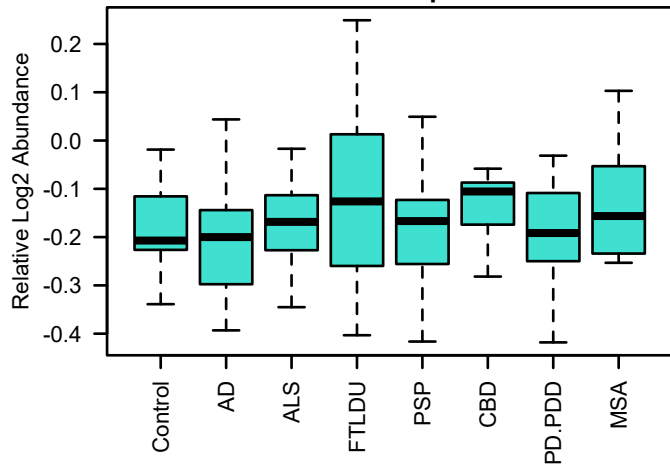

**SEPT3 UPenn Mixed PRM**  
K-W ANOVA p: 0.2

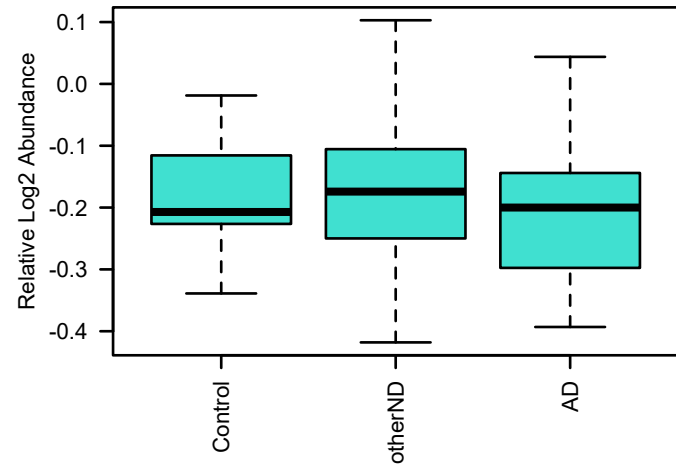

**bicor=-0.0011, p=0.99**  
**cor=-0.014, p=0.9**

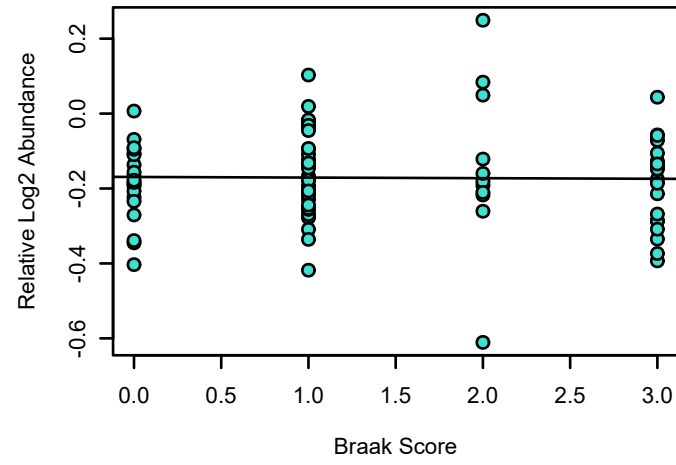

**bicor=-0.19, p=0.06**  
**cor=-0.18, p=0.073**

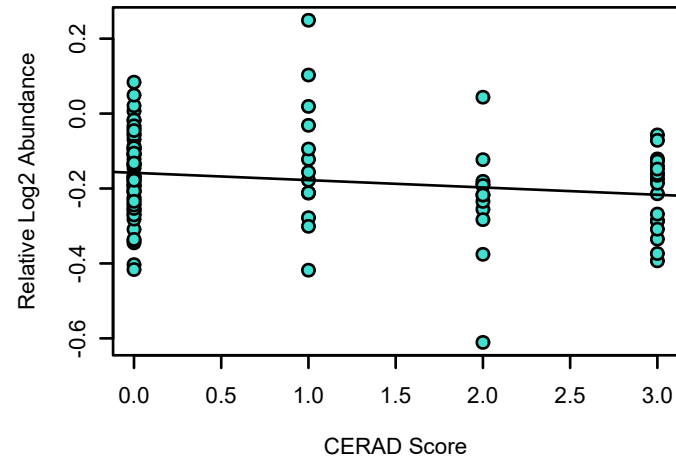

**ATP6V1H UPenn Mixed PRM**  
M1 turquoise MEGA module member  
K-W ANOVA p: 0.025

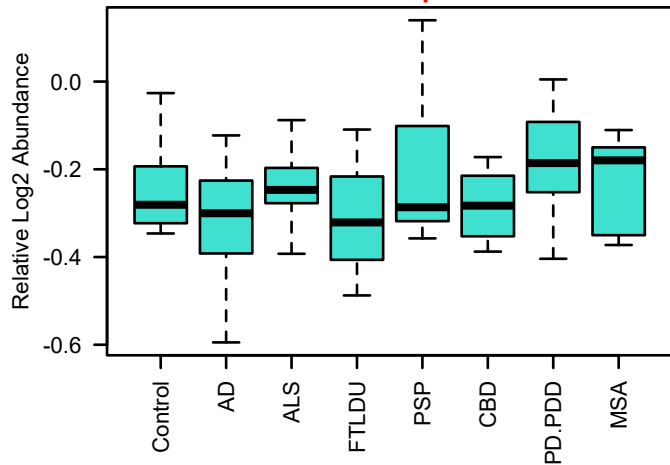

**ATP6V1H UPenn Mixed PRM**  
K-W ANOVA p: 0.02

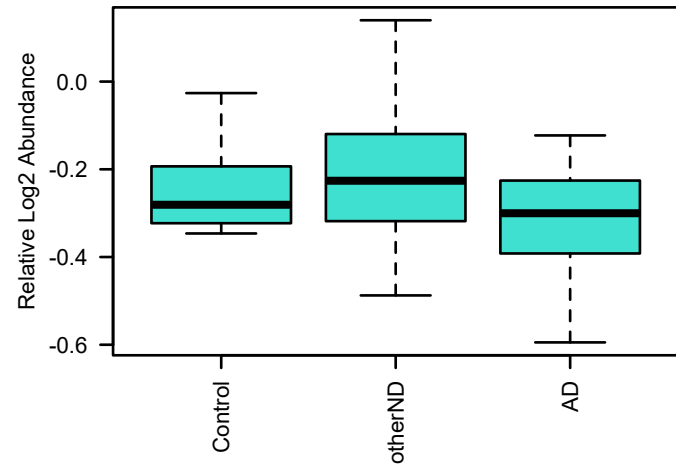

**bicor=-0.14, p=0.19**  
**cor=-0.19, p=0.083**

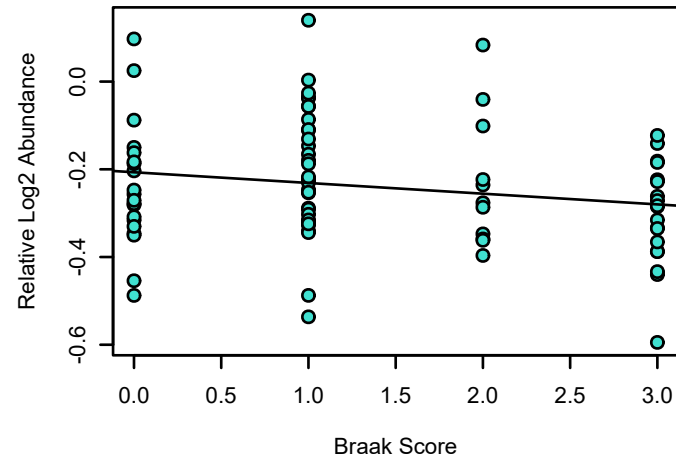

**bicor=0.0091, p=0.93**  
**cor=-0.0043, p=0.97**

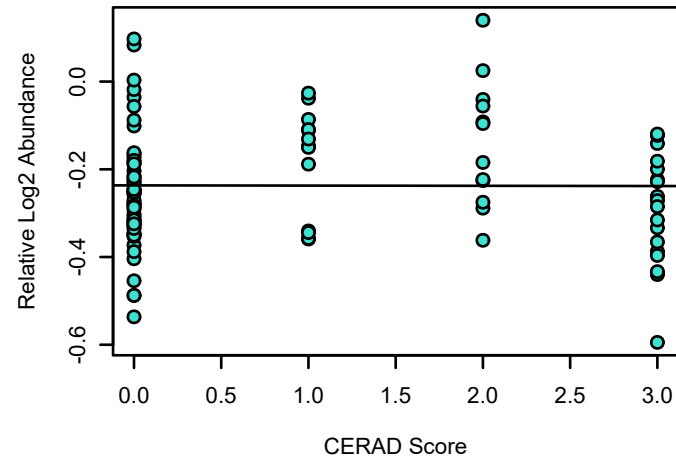

**PLXNA1 UPenn Mixed PRM**  
M1 turquoise MEGA module member  
K-W ANOVA p: 0.00017

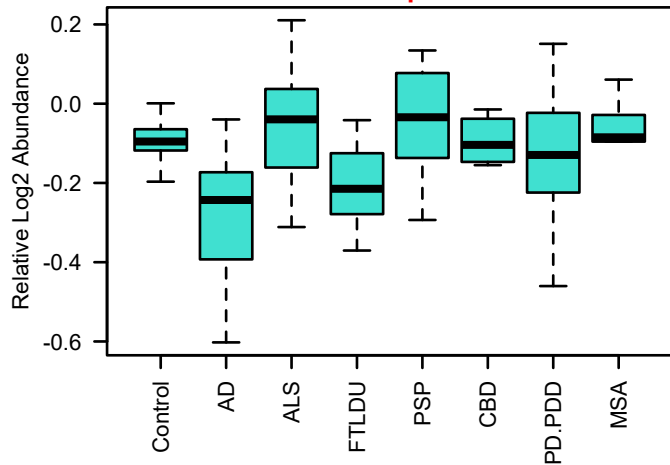

**PLXNA1 UPenn Mixed PRM**  
K-W ANOVA p: 9.6e-05

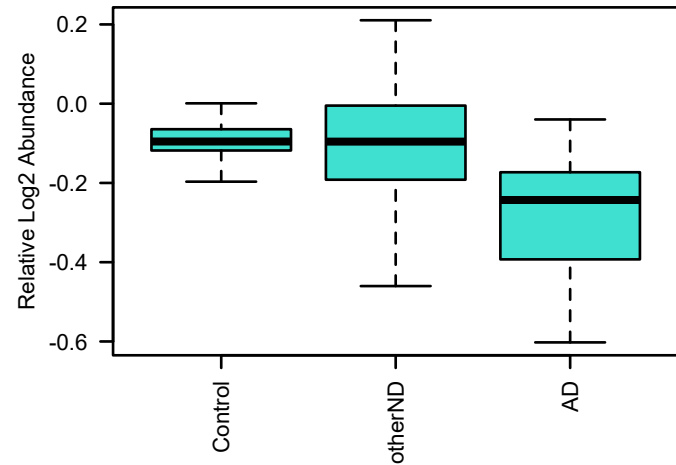

**bicor=-0.32, p=0.0027**  
**cor=-0.38, p=0.00036**

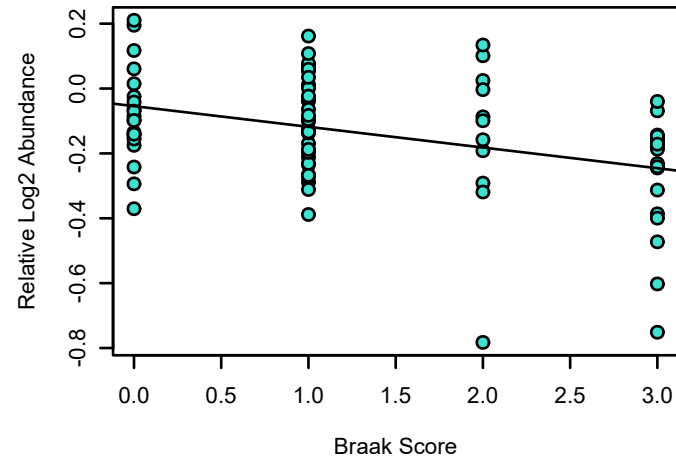

**bicor=-0.38, p=7.9e-05**  
**cor=-0.44, p=4.6e-06**

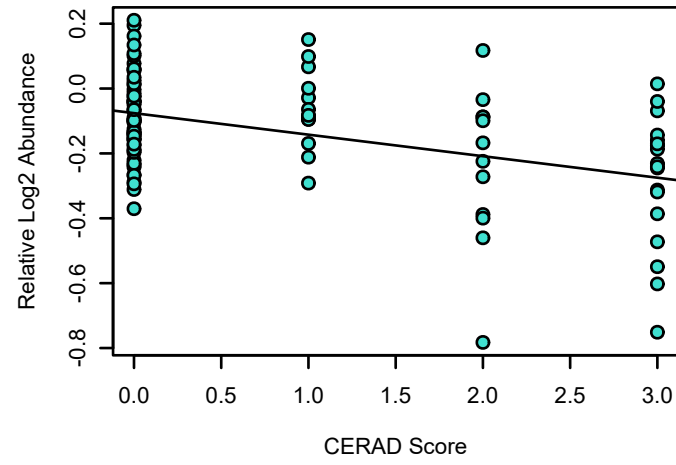

**CADPS UPenn Mixed PRM**  
M3 brown MEGA module member  
K-W ANOVA p: 0.21

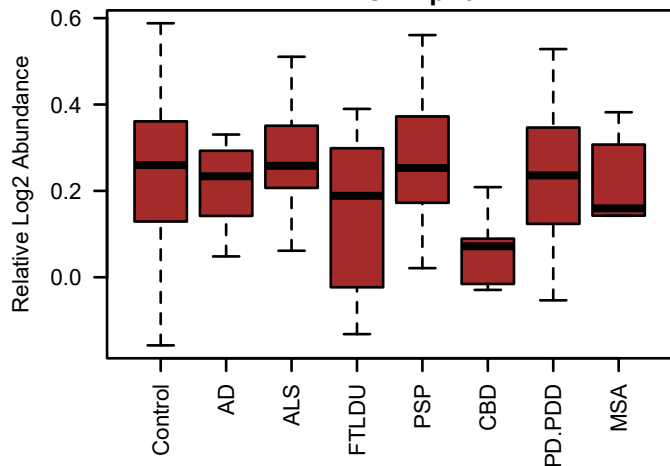

**CADPS UPenn Mixed PRM**  
K-W ANOVA p: 0.99

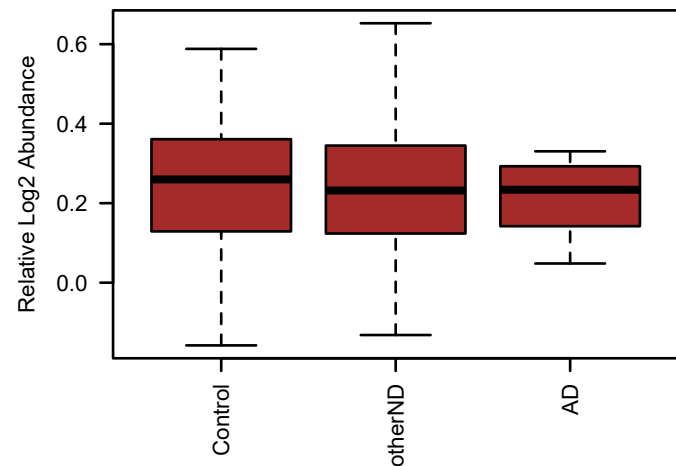

**bicor=-0.16, p=0.14**  
**cor=-0.16, p=0.15**

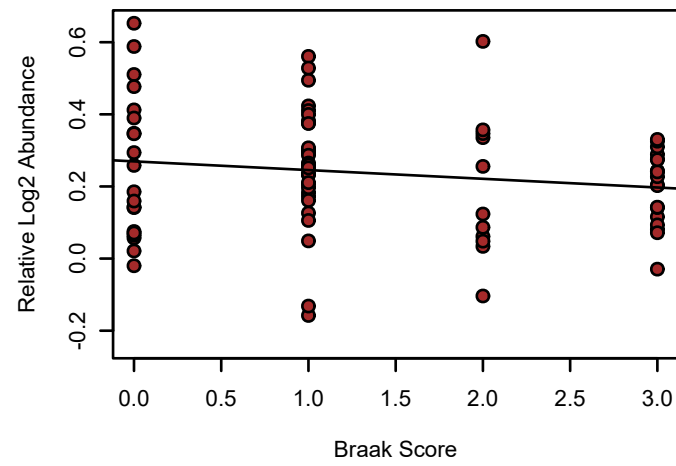

**bicor=-0.11, p=0.26**  
**cor=-0.12, p=0.23**

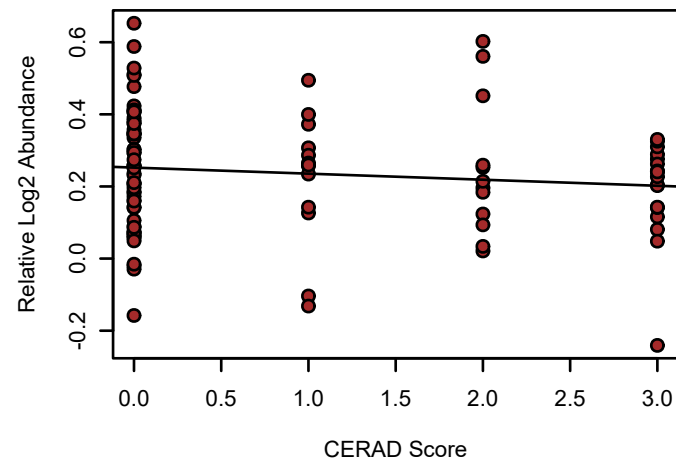

**ICAM5 UPenn Mixed PRM**  
M1 turquoise MEGA module member  
K-W ANOVA p: 0.08

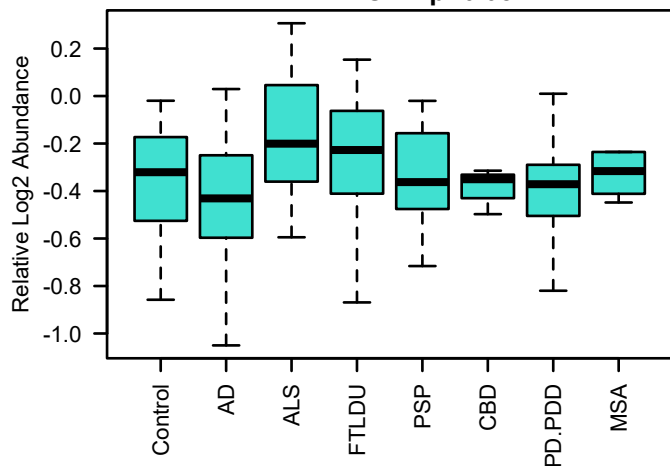

**ICAM5 UPenn Mixed PRM**  
K-W ANOVA p: 0.076

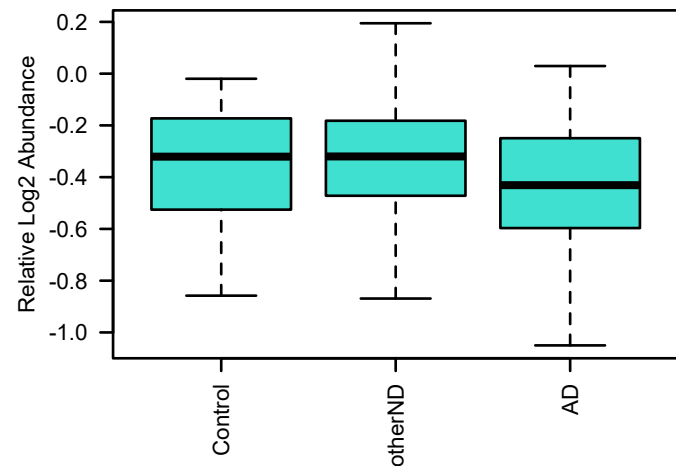

**bicor=-0.12, p=0.26**  
**cor=-0.13, p=0.24**

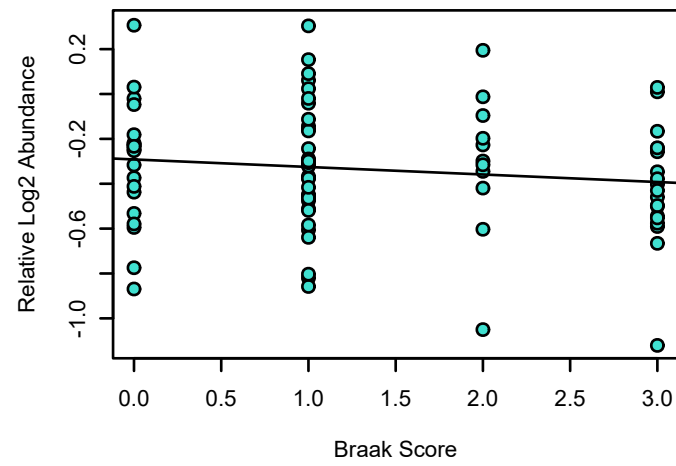

**bicor=-0.049, p=0.63**  
**cor=-0.083, p=0.41**

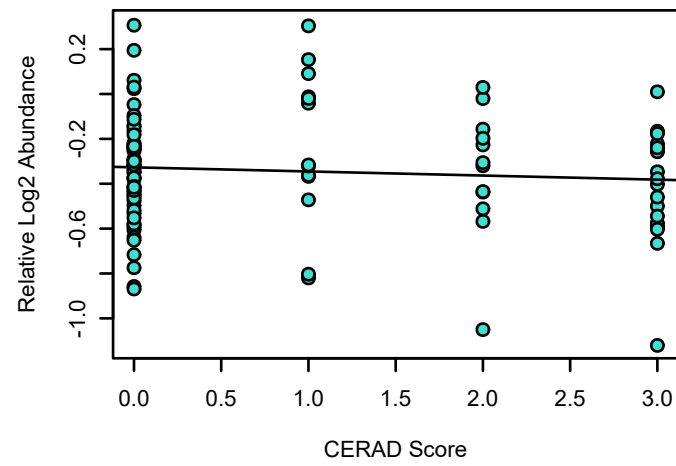

**NSFL1C UPenn Mixed PRM**  
NA grey MEGA module member  
K-W ANOVA p: 0.0013

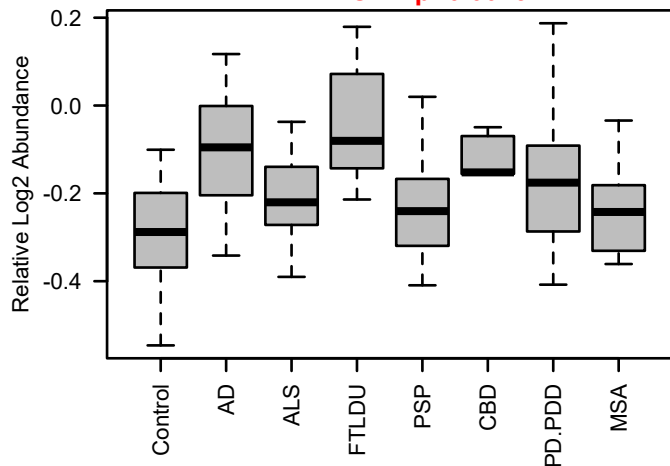

**NSFL1C UPenn Mixed PRM**  
K-W ANOVA p: 0.0022

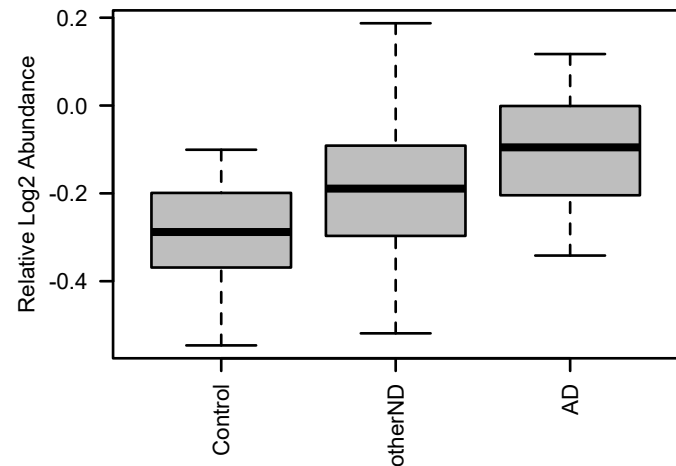

**bicor=0.31, p=0.0046**  
**cor=0.31, p=0.0041**

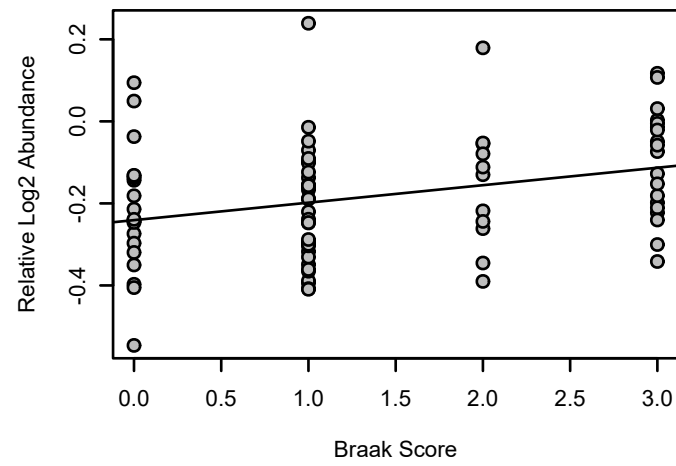

**bicor=0.24, p=0.018**  
**cor=0.23, p=0.021**

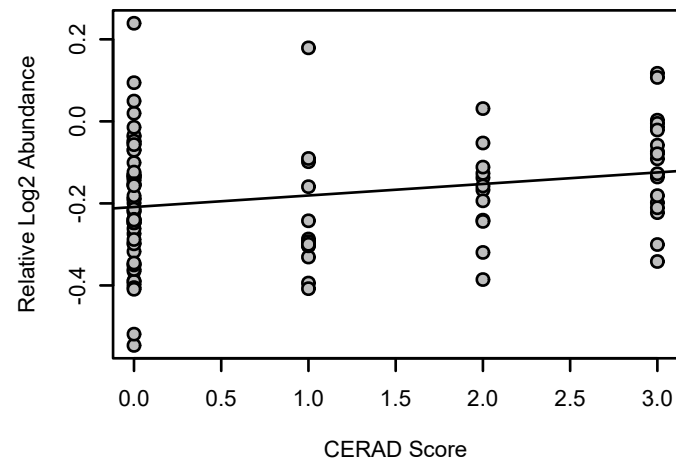

**BSN UPenn Mixed PRM**  
M1 turquoise MEGA module member  
K-W ANOVA p: 9.3e-06

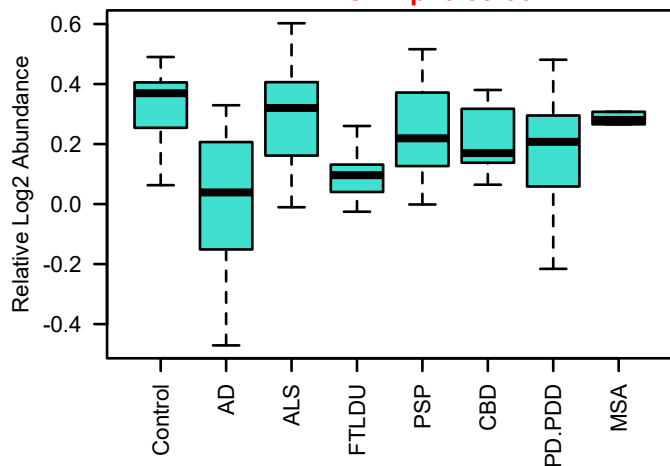

**BSN UPenn Mixed PRM**  
K-W ANOVA p: 5.9e-06

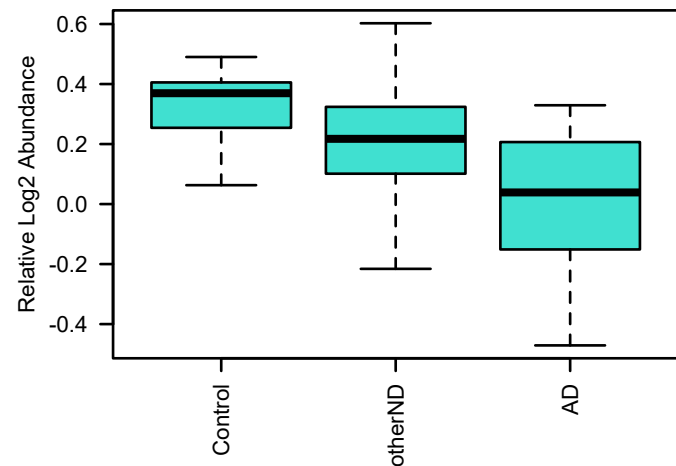

**bicor=-0.43, p=4.2e-05**  
**cor=-0.44, p=2.8e-05**

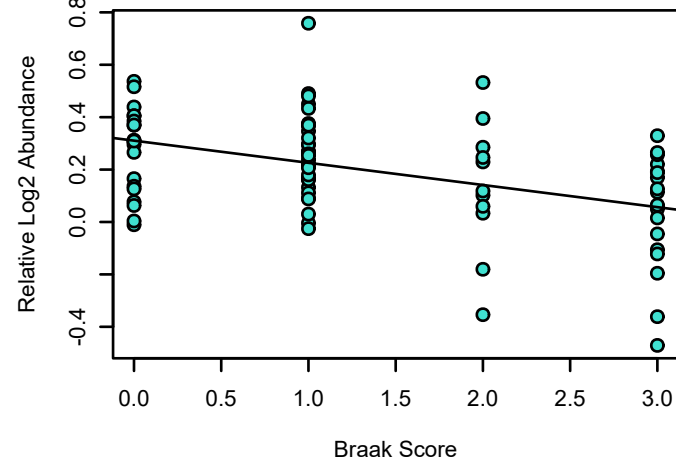

**bicor=-0.34, p=0.00055**  
**cor=-0.38, p=9.6e-05**

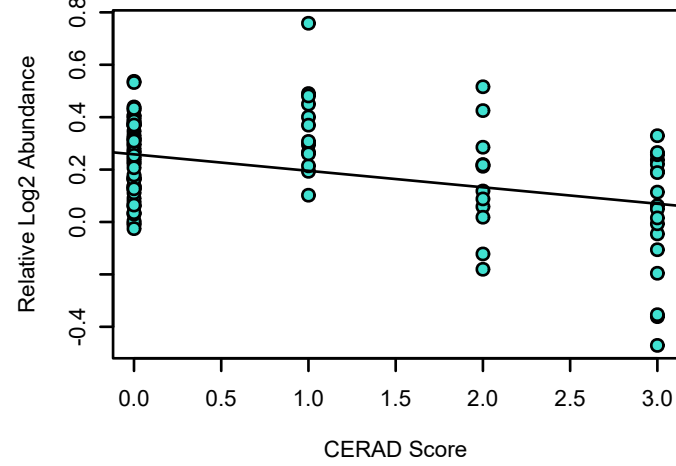



**SLC8A2 UPenn Mixed PRM**  
M1 turquoise MEGA module member  
K-W ANOVA p: 0.21

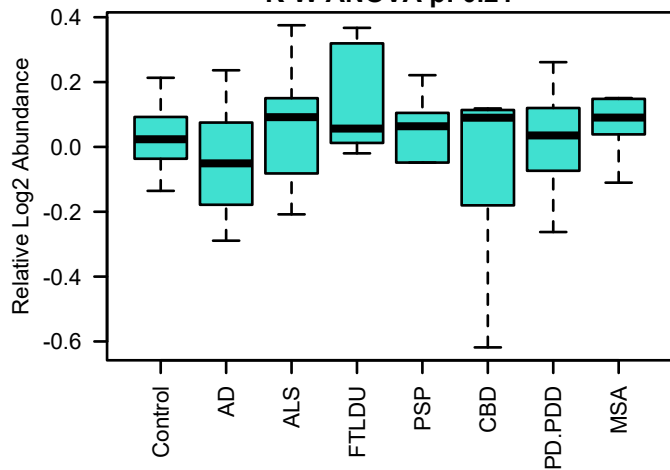

**SLC8A2 UPenn Mixed PRM**  
K-W ANOVA p: 0.21

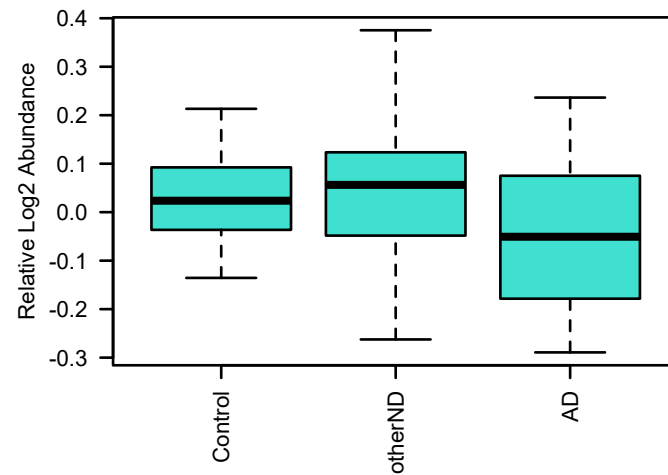

**bicor=-0.1, p=0.36**  
**cor=-0.16, p=0.15**

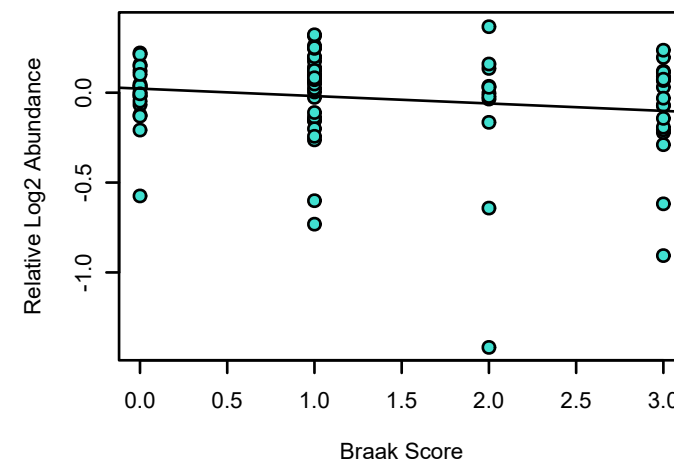

**bicor=-0.06, p=0.56**  
**cor=0.029, p=0.77**

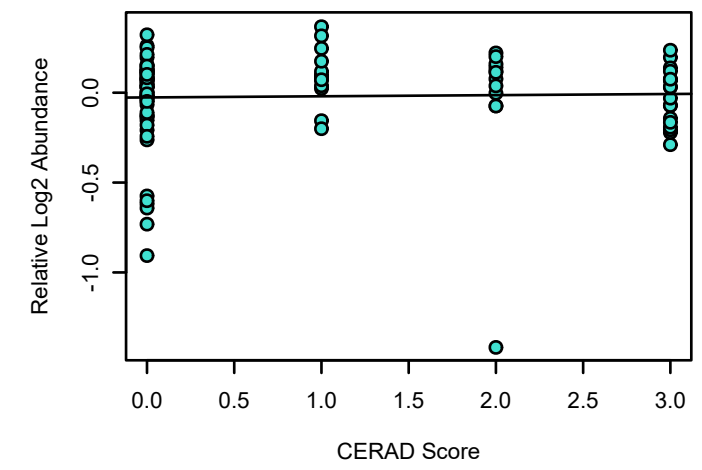

**BAIAP2 UPenn Mixed PRM**  
M1 turquoise MEGA module member  
K-W ANOVA p: 0.00039

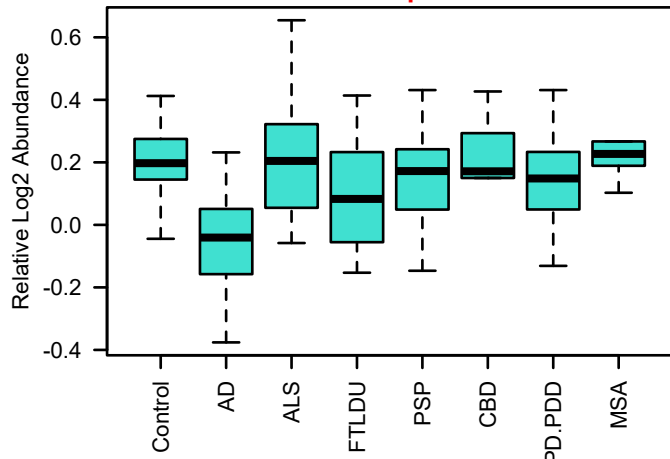

**BAIAP2 UPenn Mixed PRM**  
K-W ANOVA p: 1.2e-05

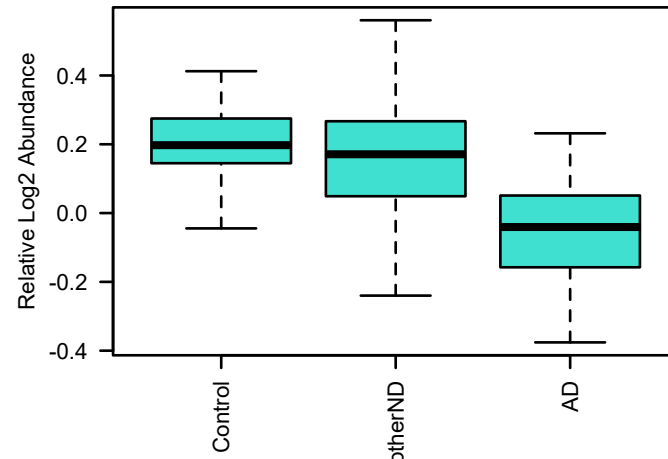

**bicor=-0.37, p=0.00058**  
**cor=-0.38, p=0.00036**

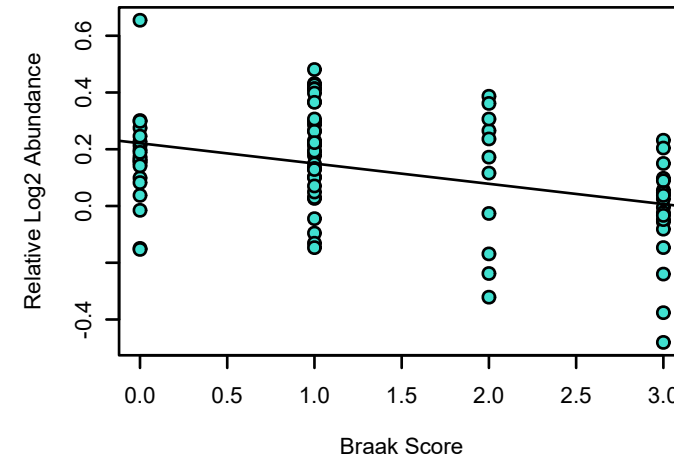

**bicor=-0.33, p=0.00072**  
**cor=-0.35, p=0.00036**

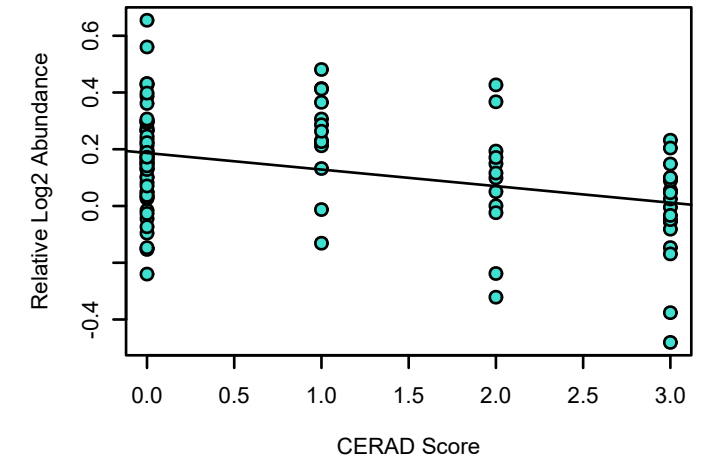

**CAMK2A UPenn Mixed PRM**  
M6 red MEGA module member  
K-W ANOVA p: 0.03

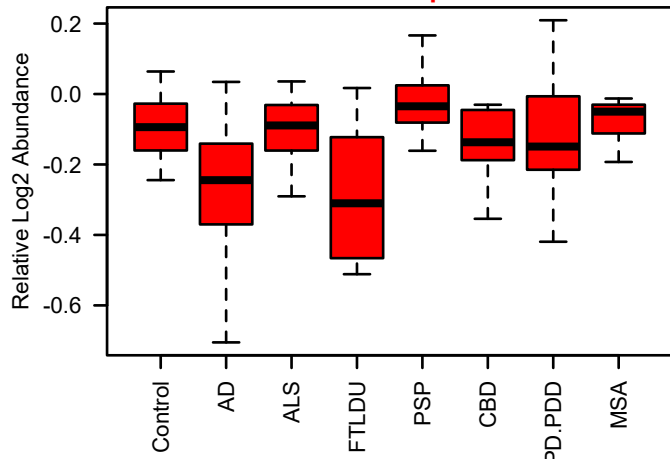

**CAMK2A UPenn Mixed PRM**  
K-W ANOVA p: 0.024

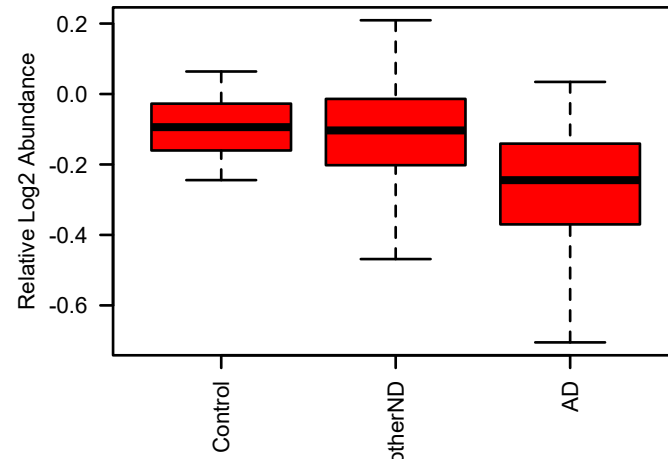

**bicor=-0.24, p=0.031**  
**cor=-0.24, p=0.028**

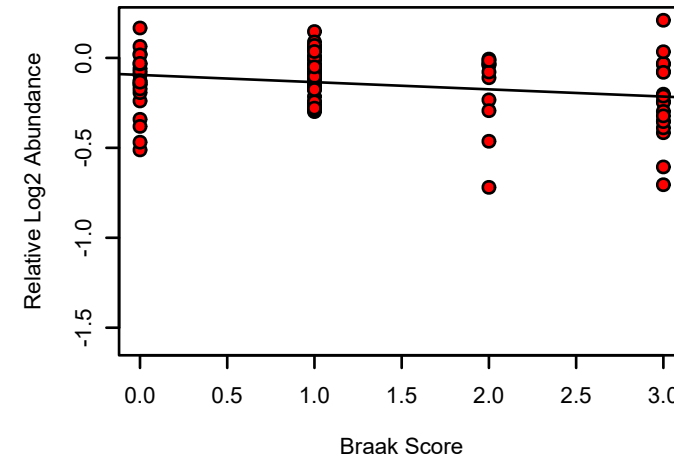

**bicor=-0.18, p=0.068**  
**cor=-0.22, p=0.028**

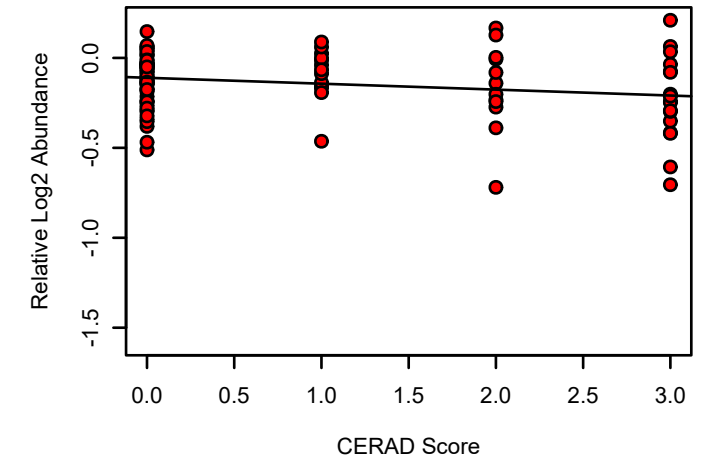

**NCKAP1 UPenn Mixed PRM**  
M1 turquoise MEGA module member  
K-W ANOVA p: 0.036

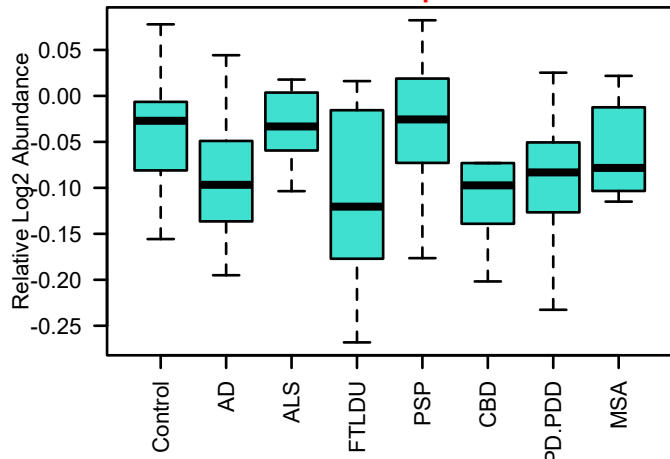

**NCKAP1 UPenn Mixed PRM**  
K-W ANOVA p: 0.32

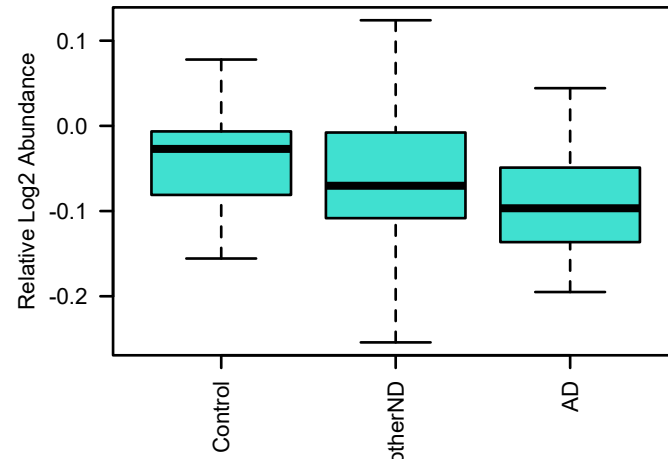

**bicor=-0.21, p=0.057**  
**cor=-0.2, p=0.068**

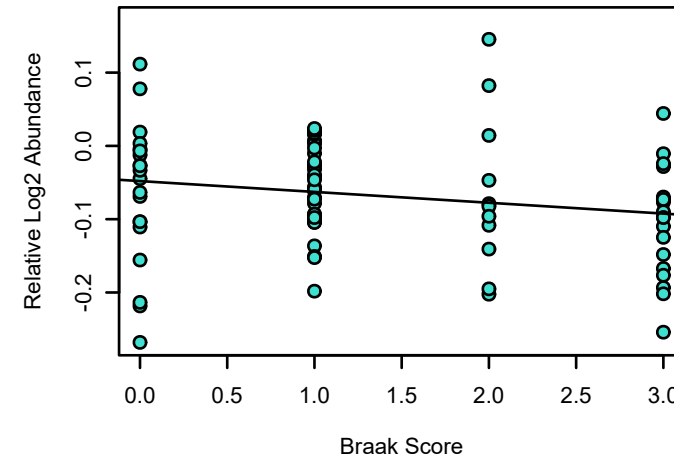

**bicor=-0.16, p=0.12**  
**cor=-0.16, p=0.11**

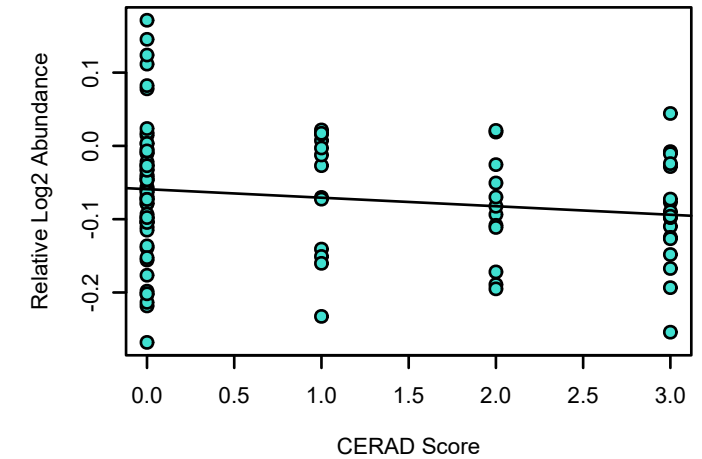

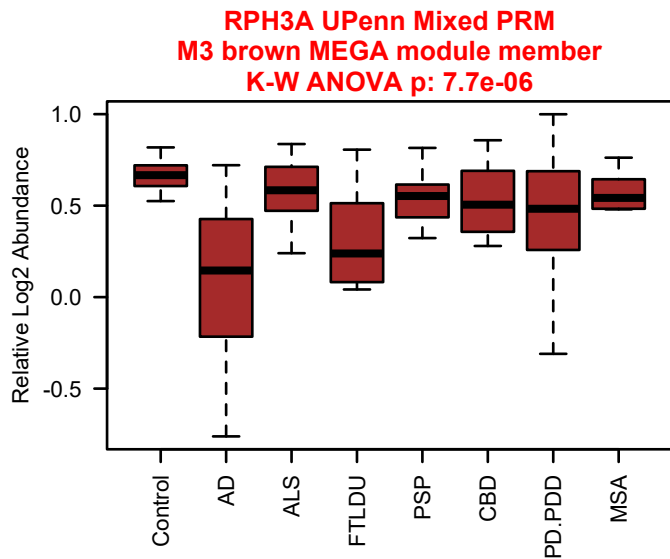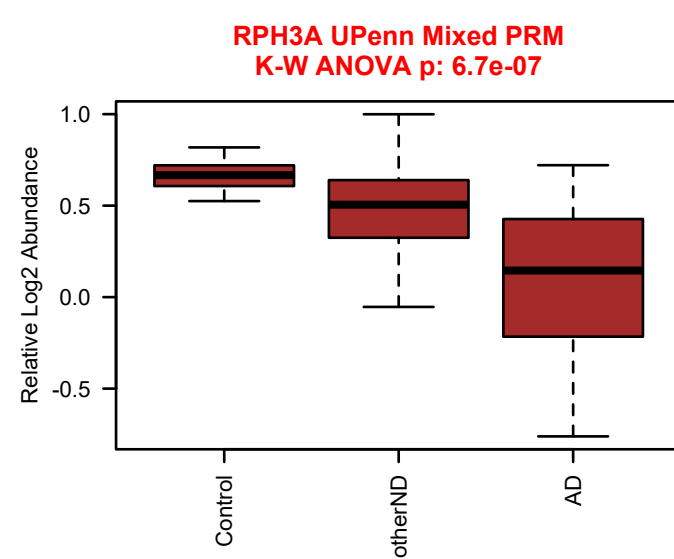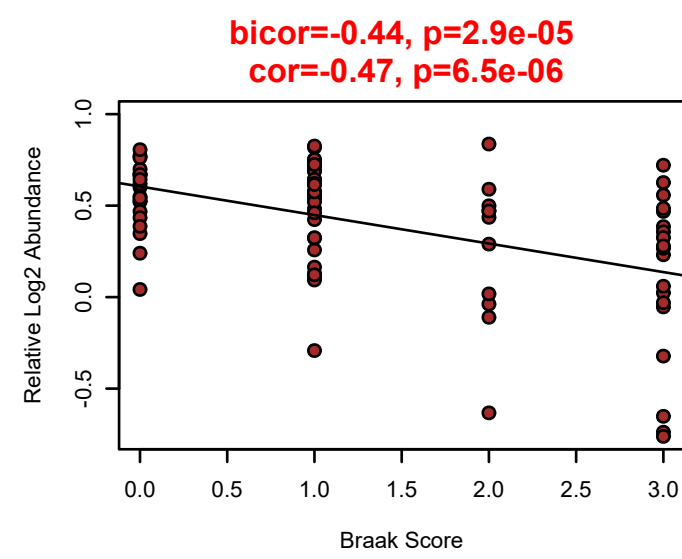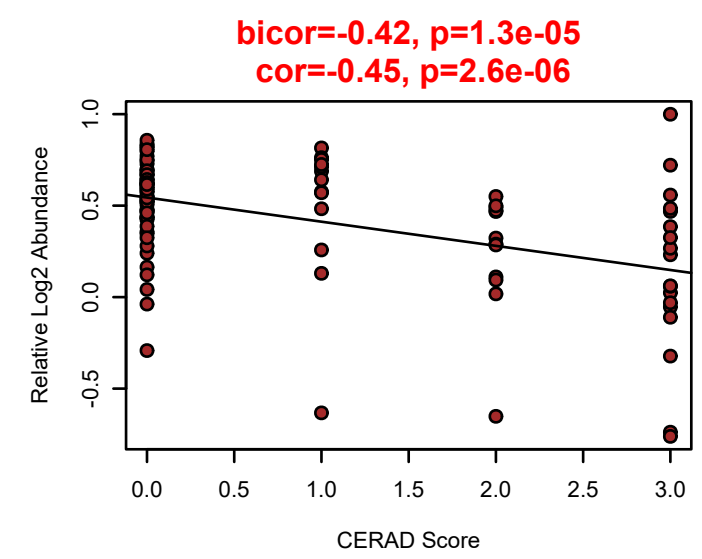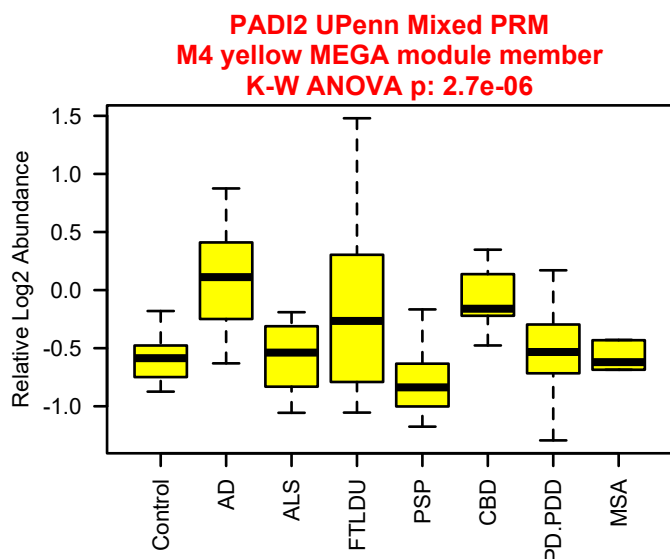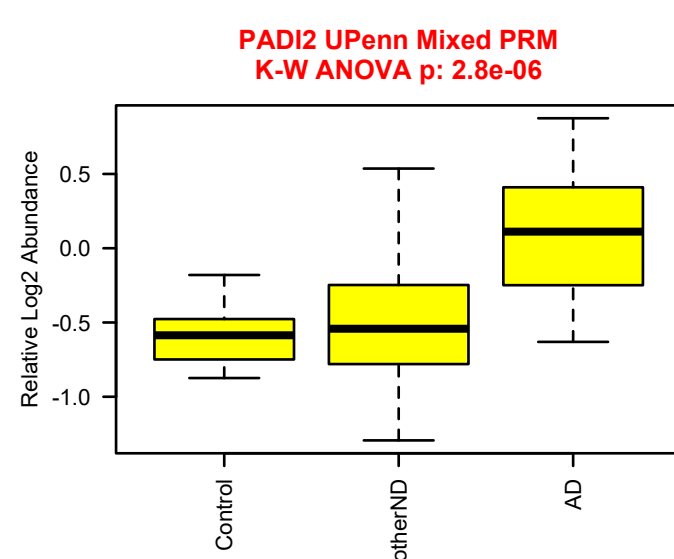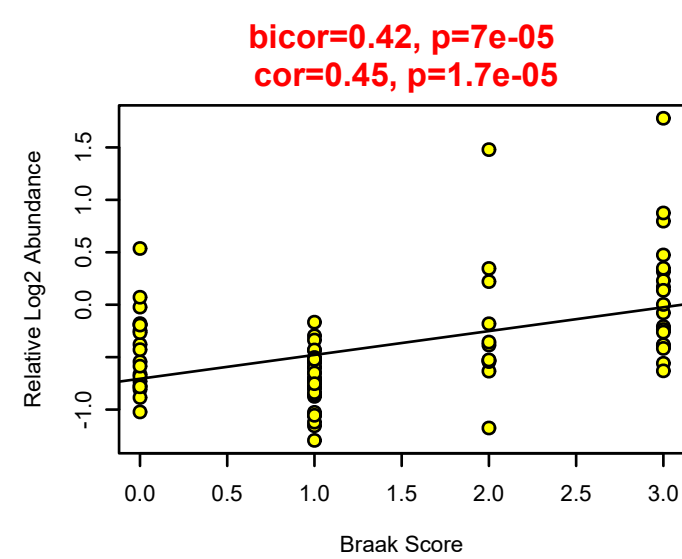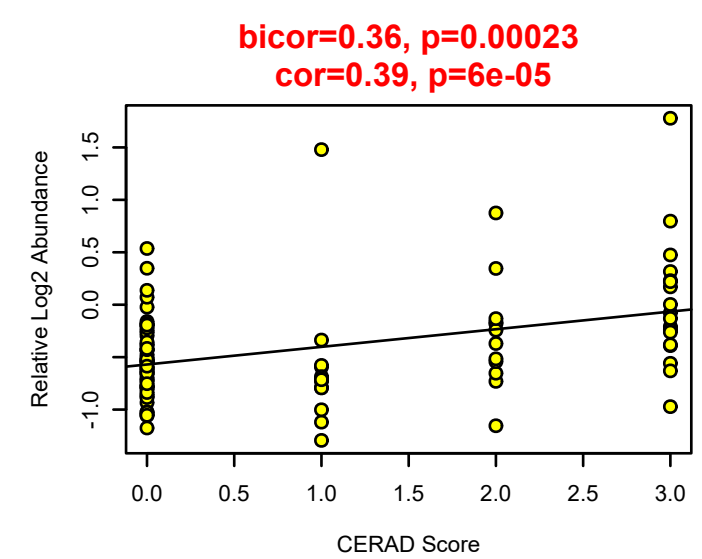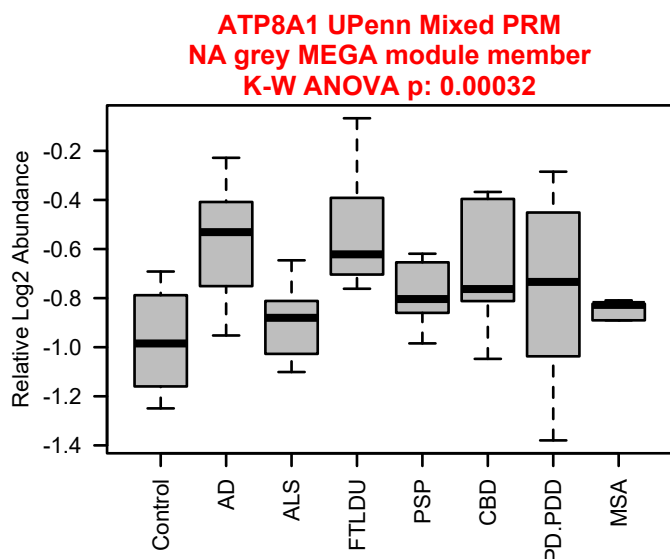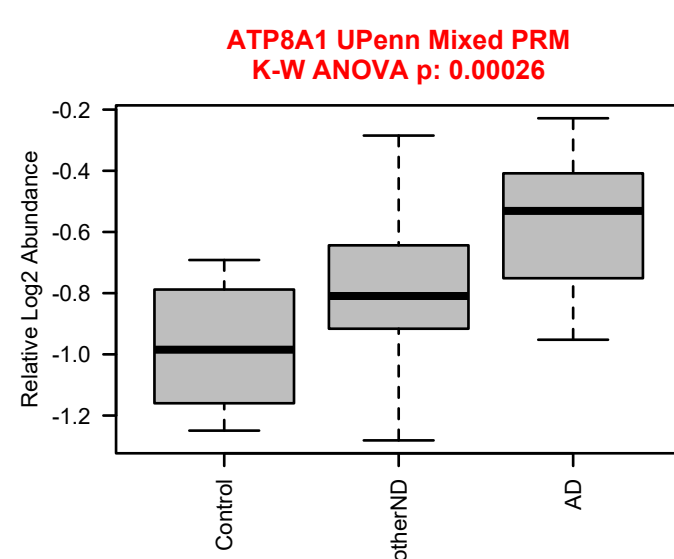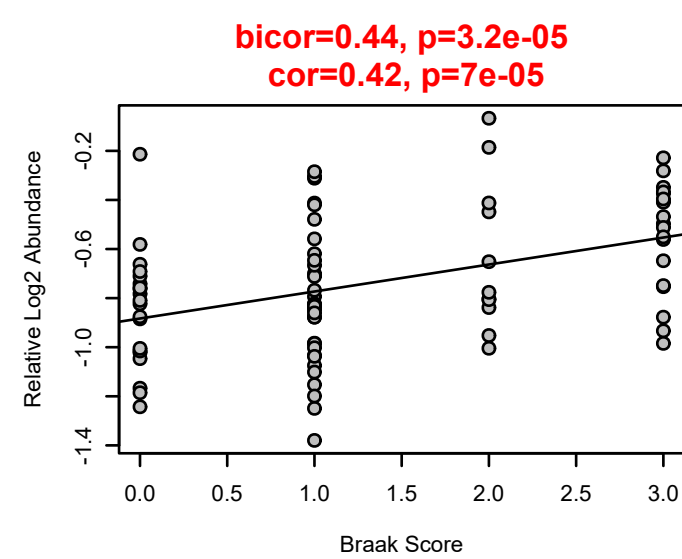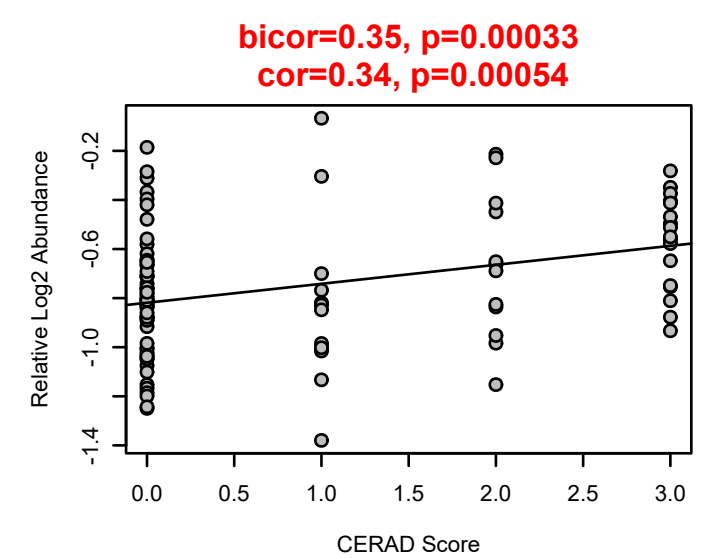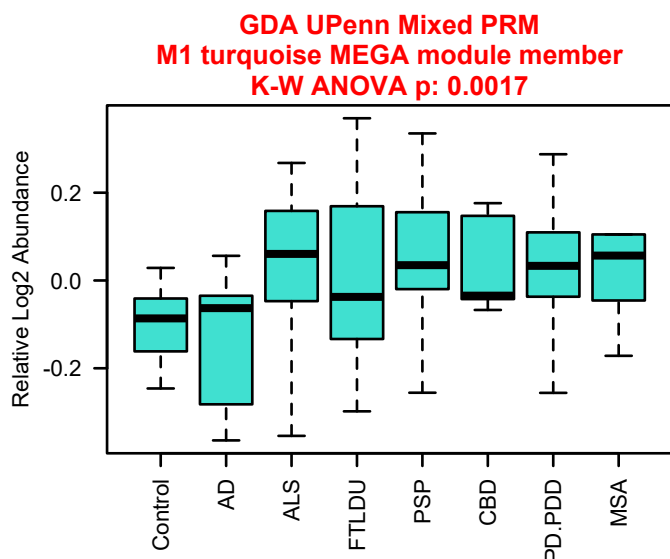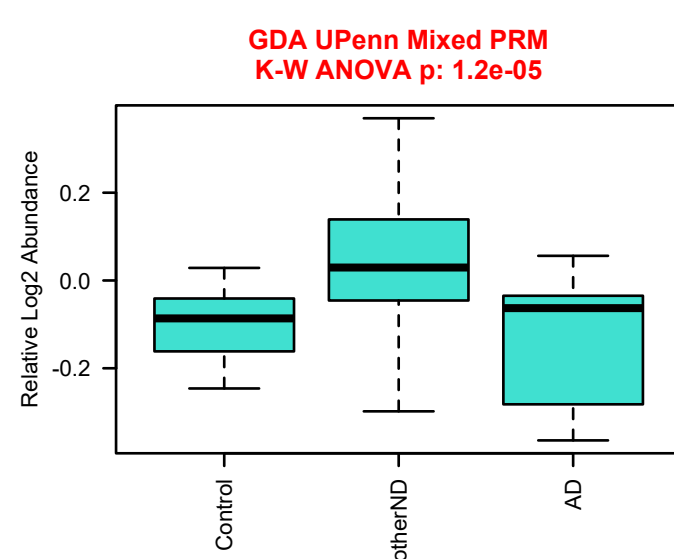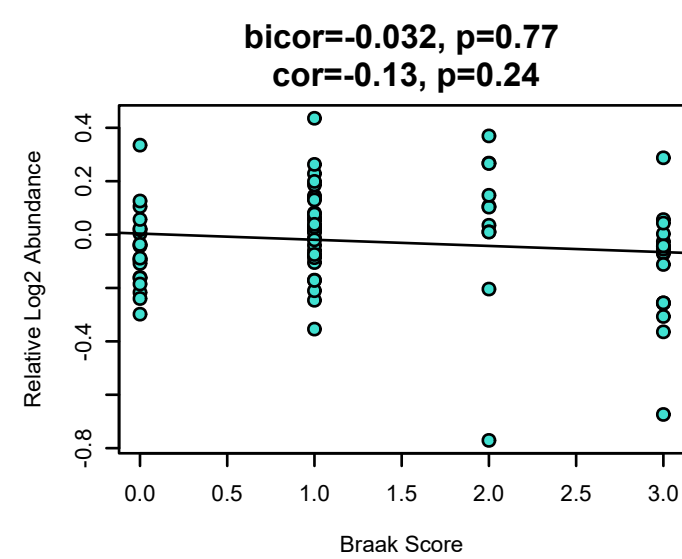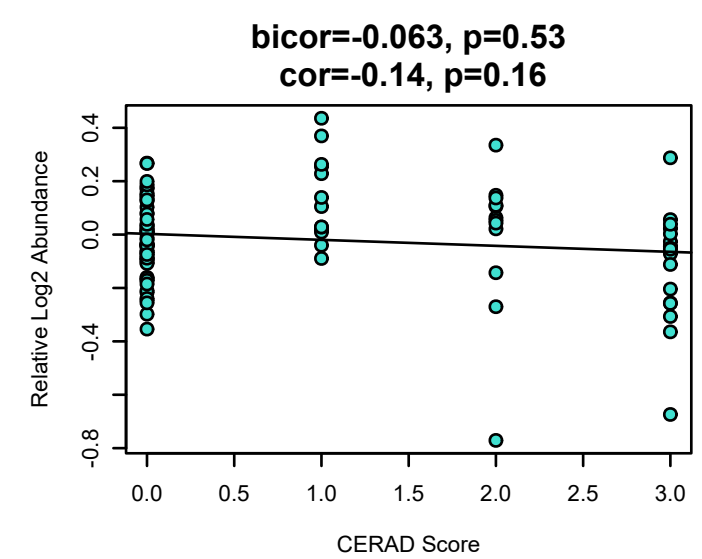

**WDR7 UPenn Mixed PRM**  
M1 turquoise MEGA module member  
K-W ANOVA p: 0.25

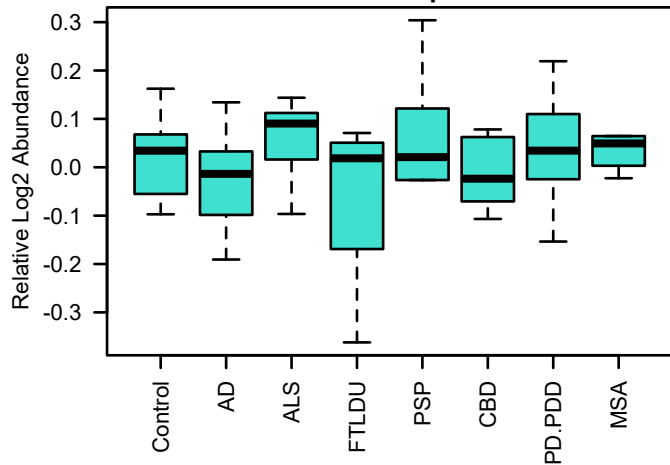

**WDR7 UPenn Mixed PRM**  
K-W ANOVA p: 0.32

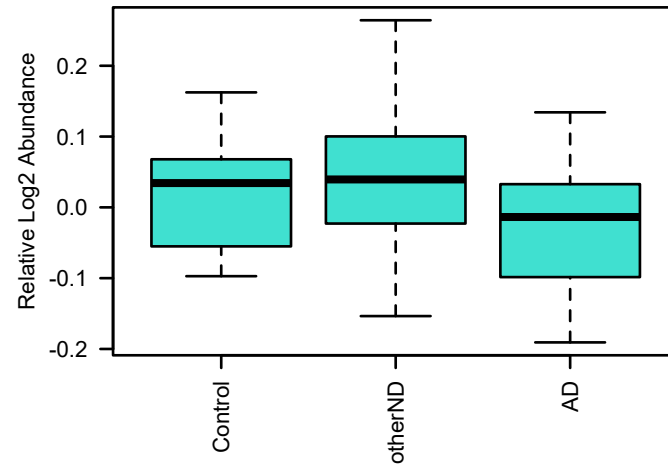

**bicor=-0.2, p=0.063**  
**cor=-0.22, p=0.044**

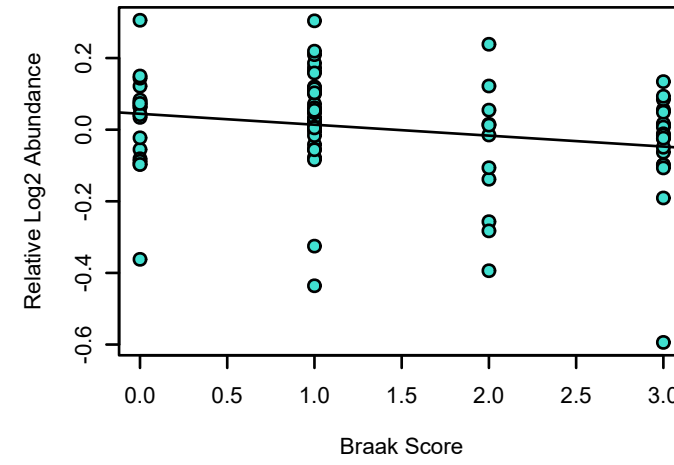

**bicor=-0.11, p=0.27**  
**cor=-0.021, p=0.84**

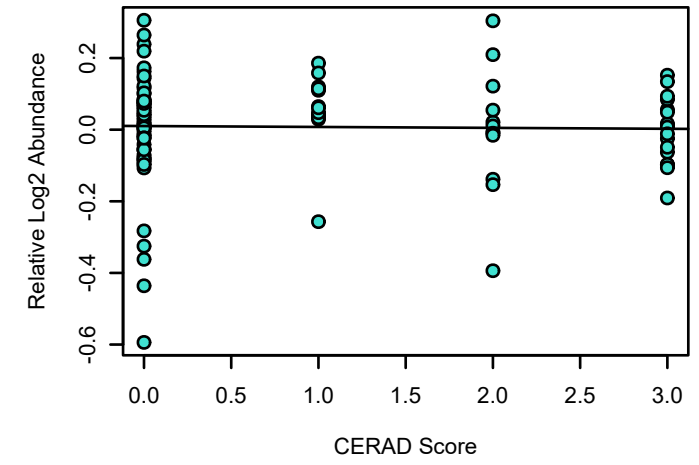

**AFG3L2 UPenn Mixed PRM**  
M3 brown MEGA module member  
K-W ANOVA p: 0.5

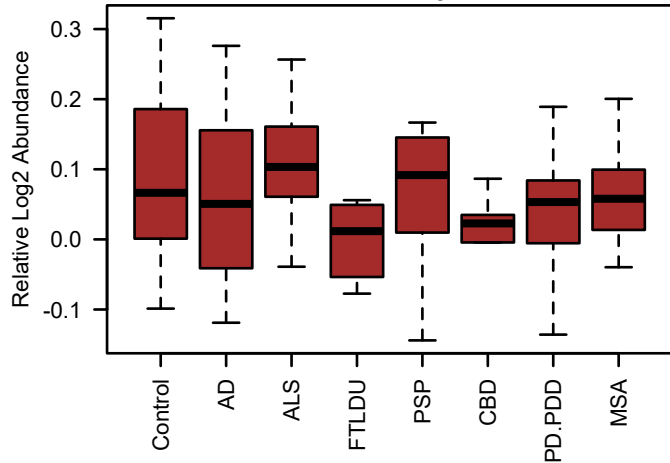

**AFG3L2 UPenn Mixed PRM**  
K-W ANOVA p: 0.52

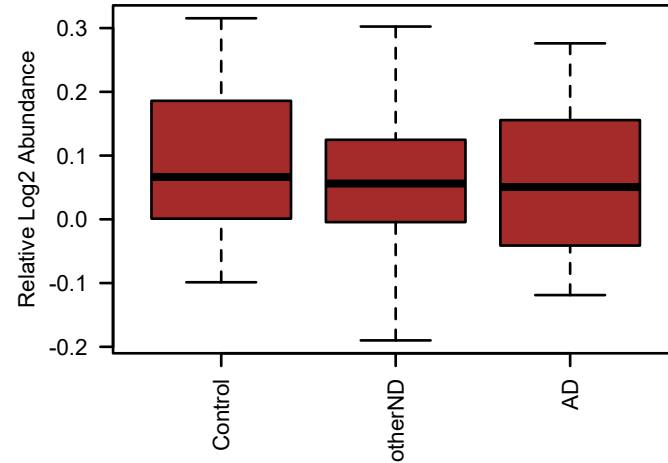

**bicor=-0.16, p=0.14**  
**cor=-0.2, p=0.068**

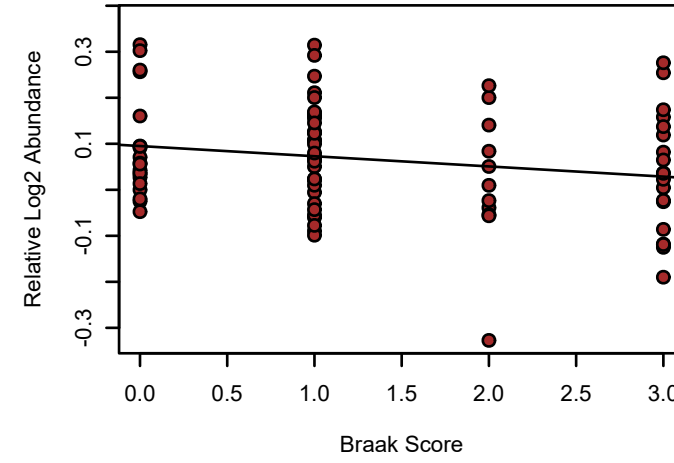

**bicor=-0.11, p=0.29**  
**cor=-0.11, p=0.28**

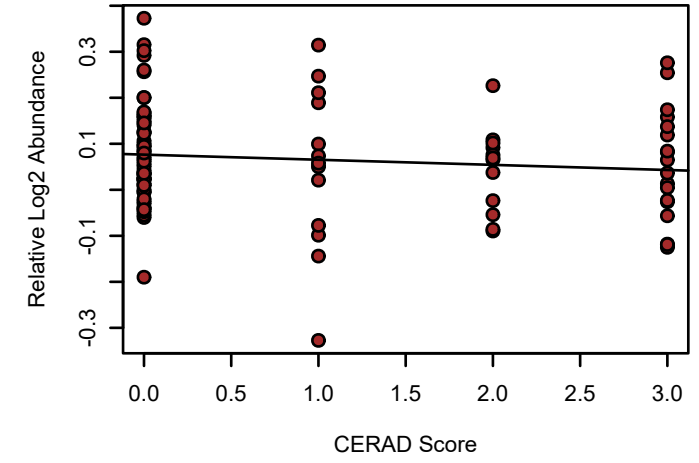

**S100A6 UPenn Mixed PRM**  
NA grey MEGA module member  
K-W ANOVA p: 2.4e-07

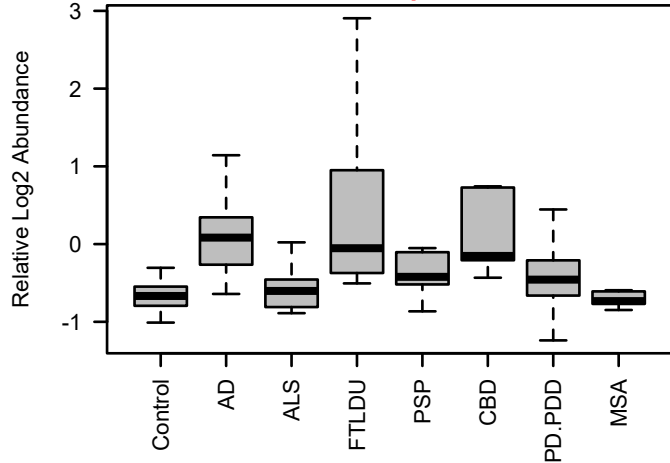

**S100A6 UPenn Mixed PRM**  
K-W ANOVA p: 0.00041

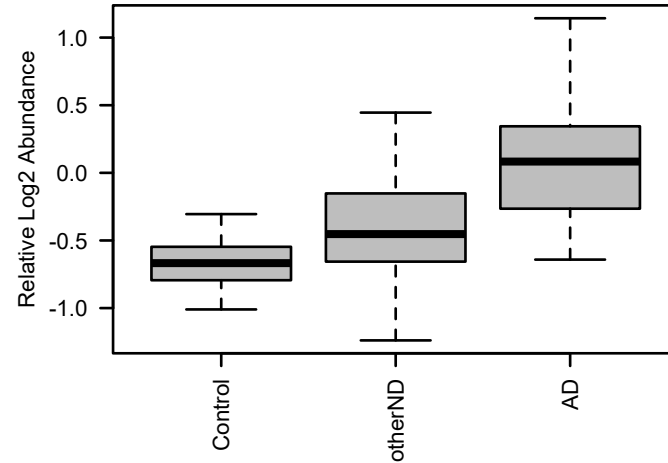

**bicor=0.55, p=5e-08**  
**cor=0.44, p=2.8e-05**

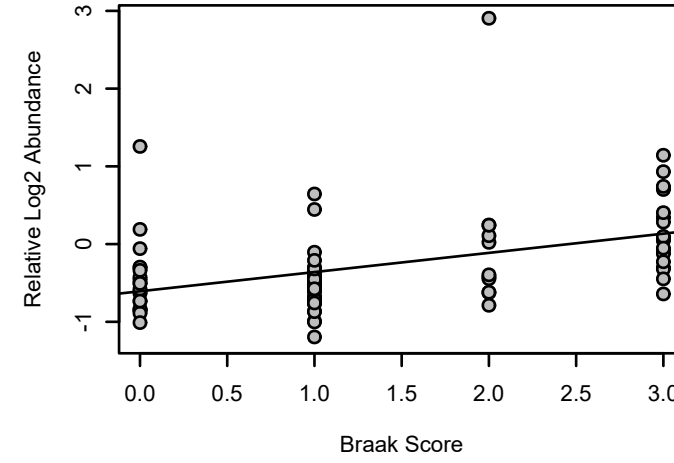

**bicor=0.38, p=8.3e-05**  
**cor=0.28, p=0.0048**

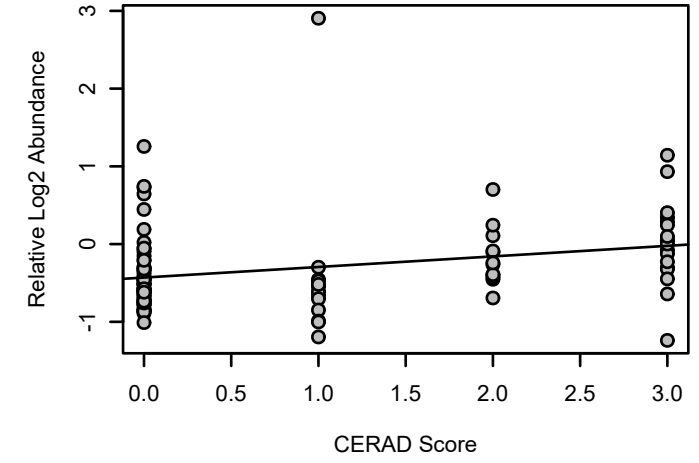

**SH3GLB2 UPenn Mixed PRM**  
M1 turquoise MEGA module member  
K-W ANOVA p: 0.0021

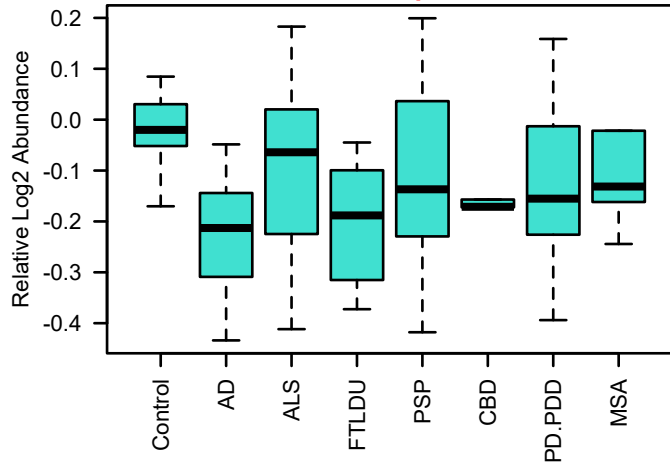

**SH3GLB2 UPenn Mixed PRM**  
K-W ANOVA p: 0.00059

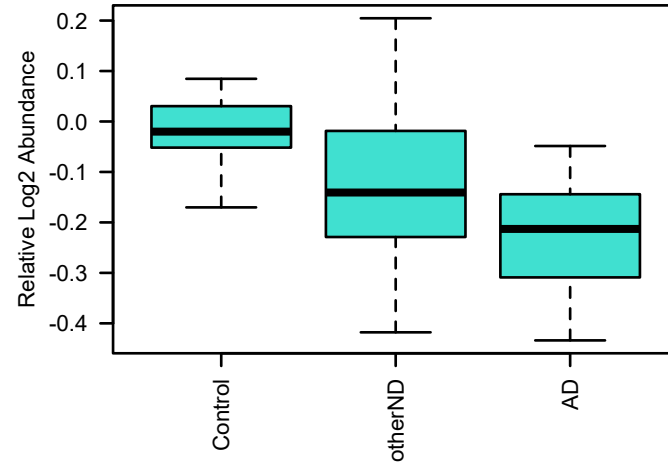

**bicor=-0.29, p=0.0067**  
**cor=-0.28, p=0.0099**

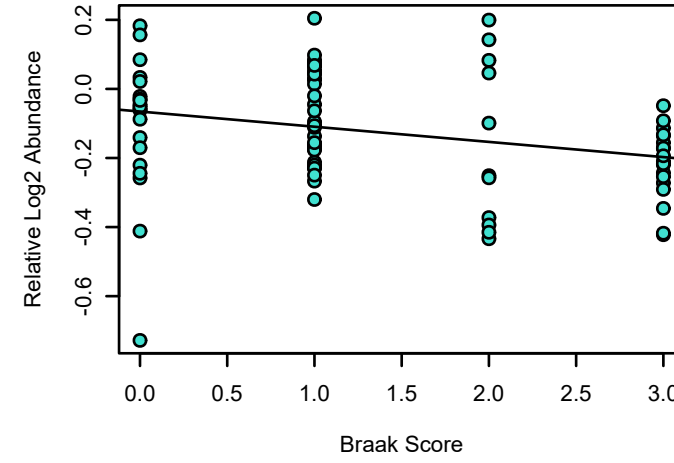

**bicor=-0.25, p=0.011**  
**cor=-0.22, p=0.028**

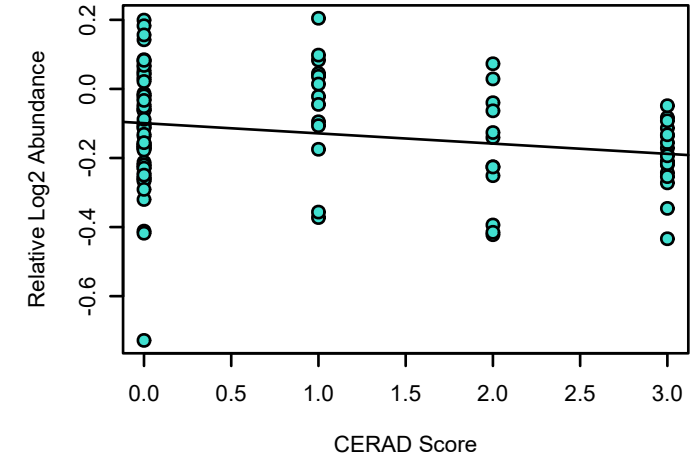

**GL0D4 UPenn Mixed PRM**  
**M4 yellow MEGA module member**  
**K-W ANOVA p: 0.22**

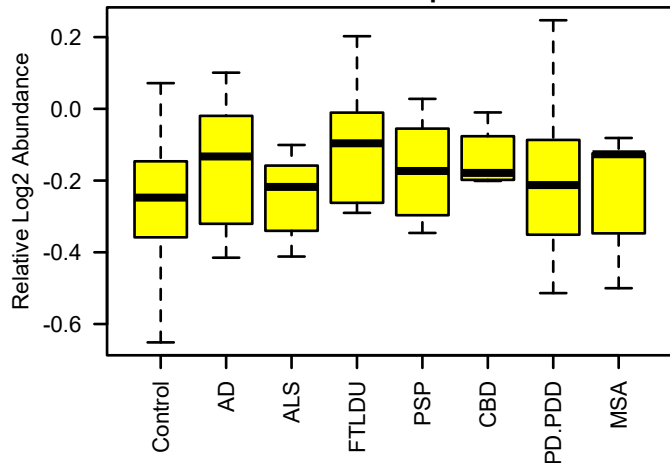

**GL0D4 UPenn Mixed PRM**  
**K-W ANOVA p: 0.14**

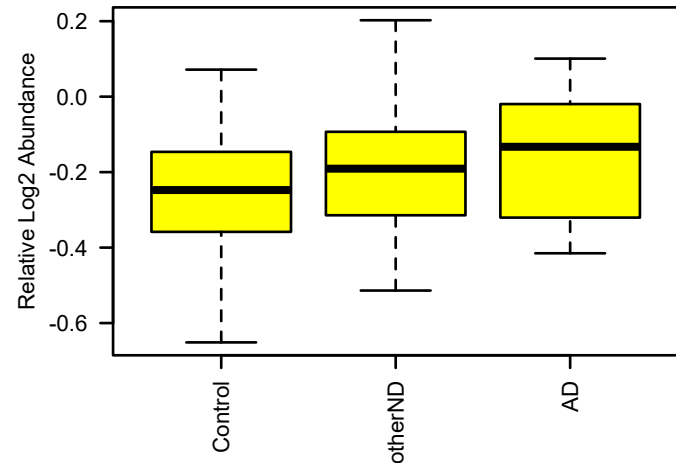

**bicor=0.059, p=0.59**  
**cor=0.081, p=0.46**

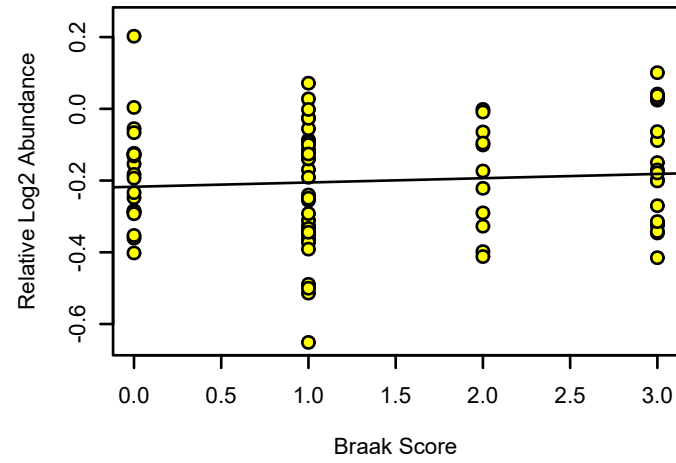

**bicor=0.09, p=0.37**  
**cor=0.096, p=0.34**

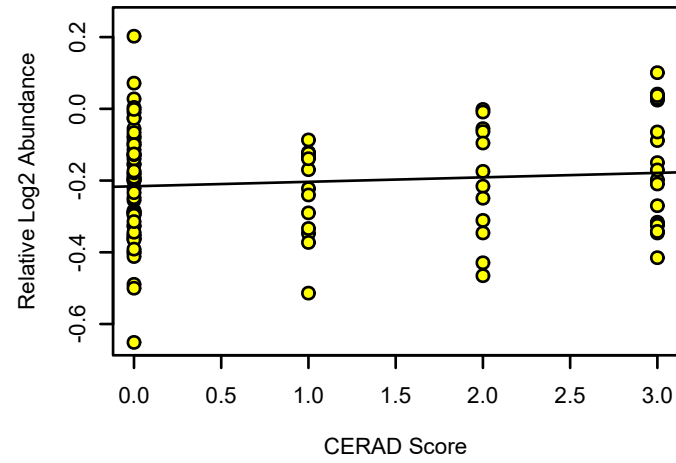

**LCMT1 UPenn Mixed PRM**  
**NA grey MEGA module member**  
**K-W ANOVA p: 0.0021**

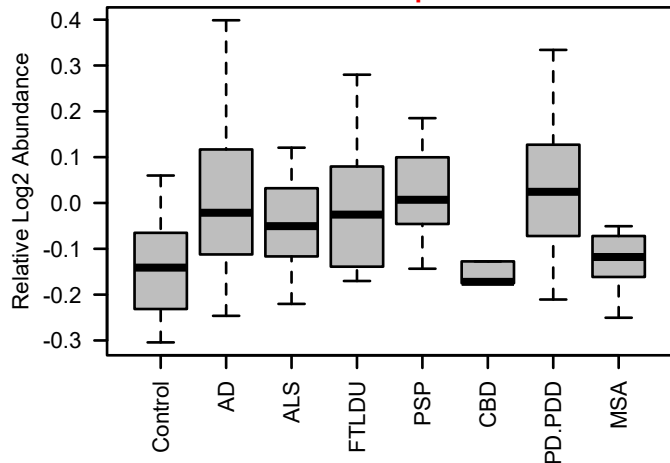

**LCMT1 UPenn Mixed PRM**  
**K-W ANOVA p: 0.0057**

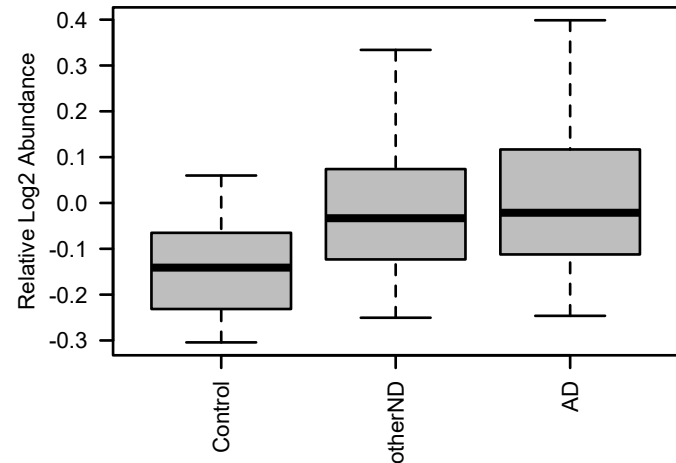

**bicor=0.19, p=0.088**  
**cor=0.14, p=0.2**

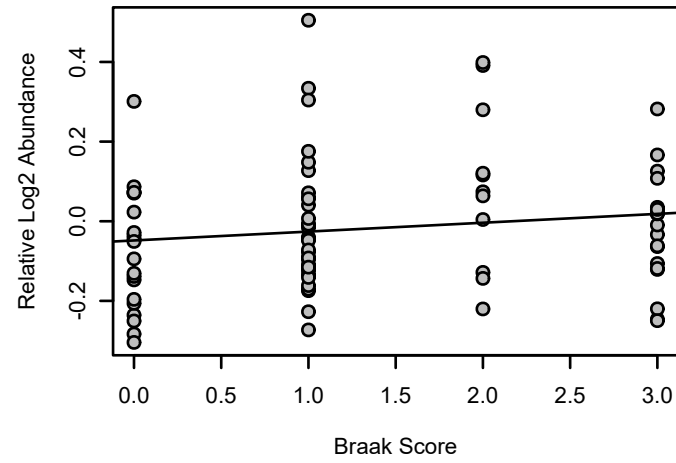

**bicor=0.17, p=0.09**  
**cor=0.17, p=0.091**

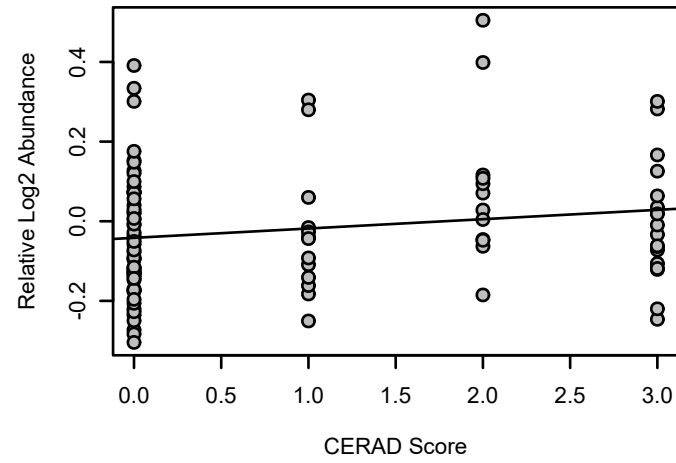

**CADM1 UPenn Mixed PRM**  
**M1 turquoise MEGA module member**  
**K-W ANOVA p: 0.08**

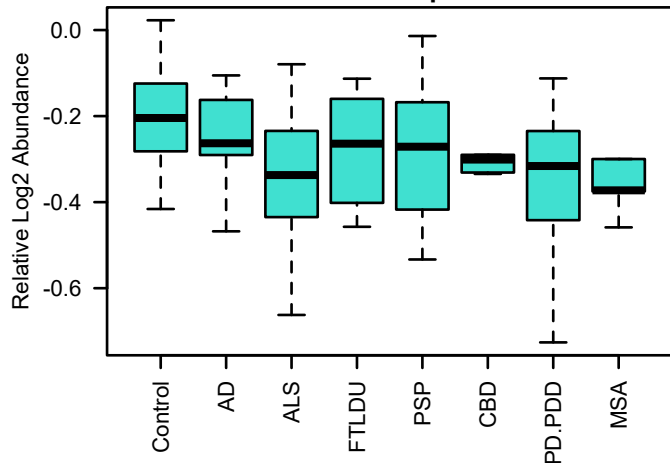

**CADM1 UPenn Mixed PRM**  
**K-W ANOVA p: 0.0049**

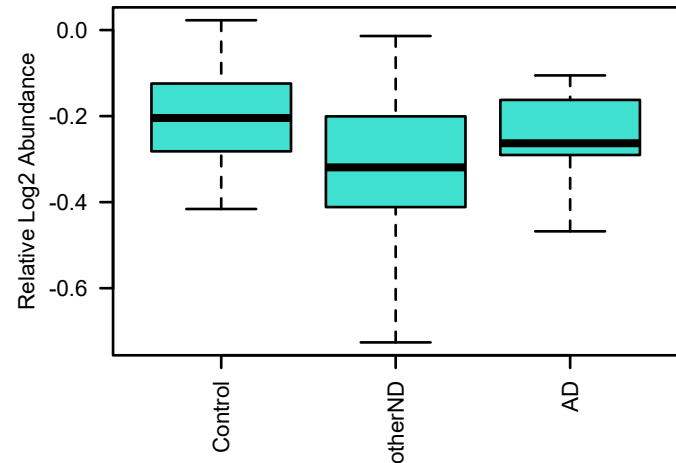

**bicor=-0.11, p=0.32**  
**cor=-0.13, p=0.24**

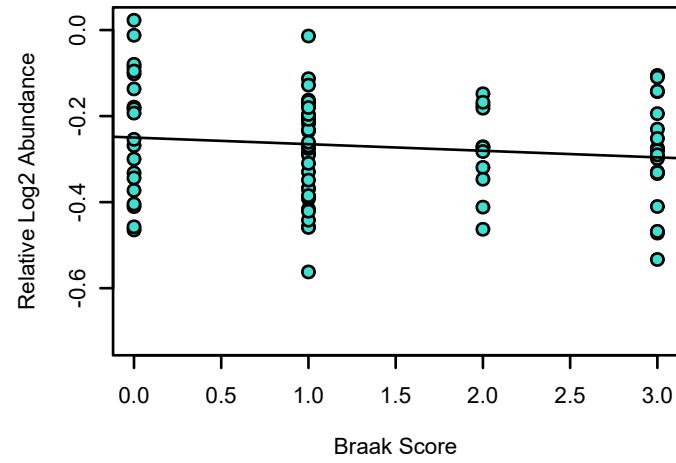

**bicor=0.035, p=0.73**  
**cor=0.039, p=0.7**

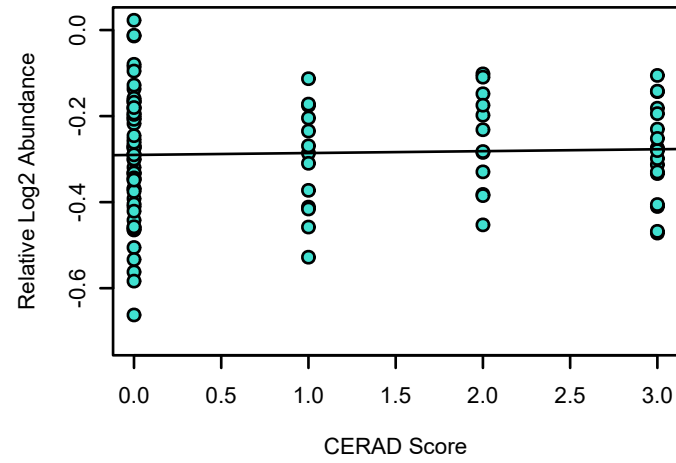



**M10 purple.Consensus**

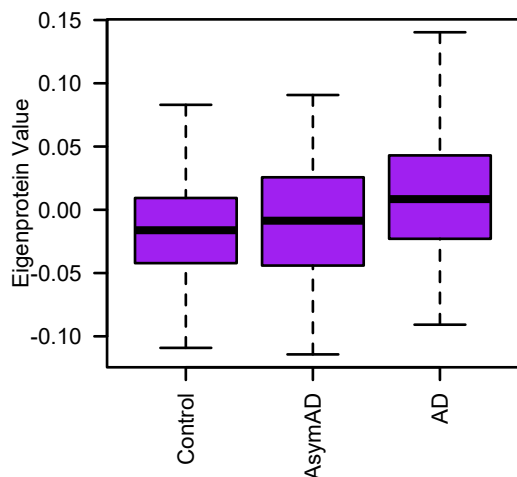

**M10 purple.UPenn Mixed PRM (Synthetic Eigenprotein)**  
K-W ANOVA p: 9.5e-05

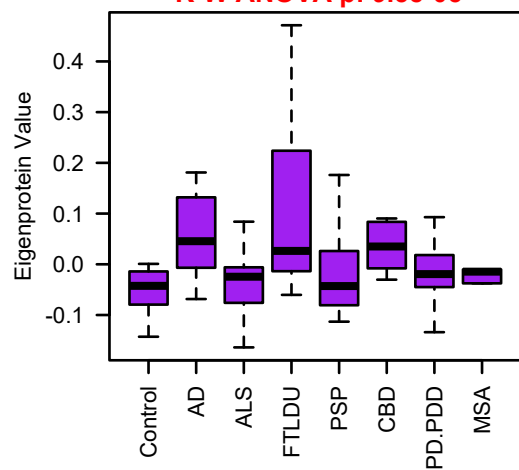

**M10 purple.UPenn Mixed PRM (Synthetic Eigenprotein)**  
K-W ANOVA p: 0.002

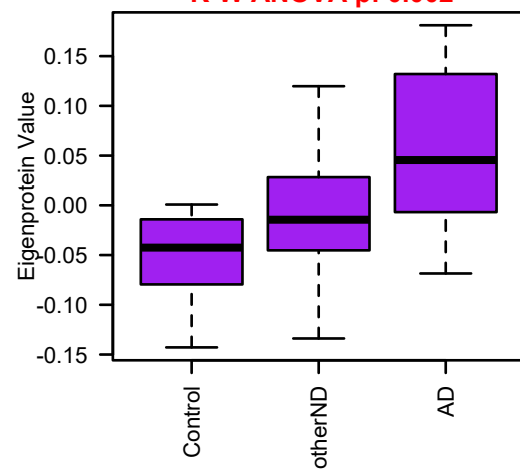

**bicor=0.36, p=0.00091**  
**cor=0.33, p=0.0022**

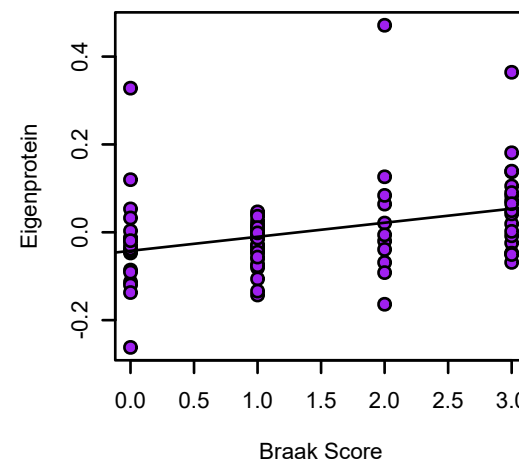

**bicor=0.24, p=0.018**  
**cor=0.24, p=0.016**

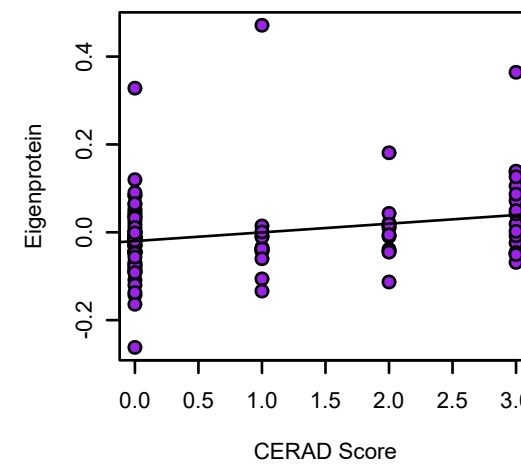

**M2 blue.Consensus**

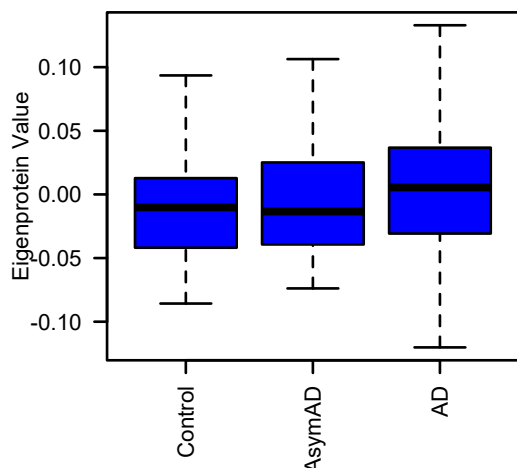

**M2 blue.UPenn Mixed PRM (Synthetic Eigenprotein)**  
K-W ANOVA p: 0.022

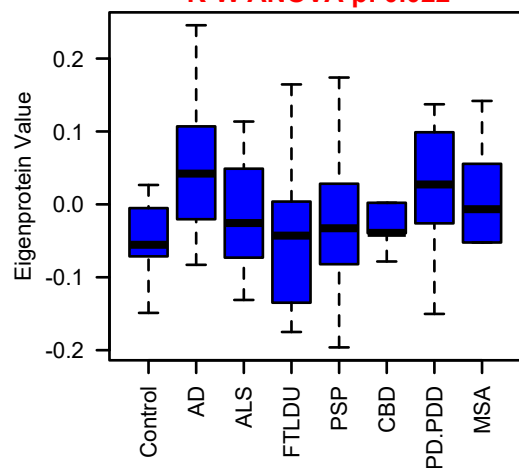

**M2 blue.UPenn Mixed PRM (Synthetic Eigenprotein)**  
K-W ANOVA p: 0.0075

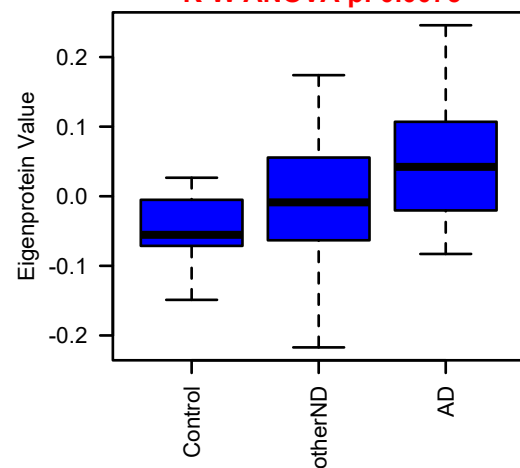

**bicor=0.3, p=0.0054**  
**cor=0.31, p=0.0041**

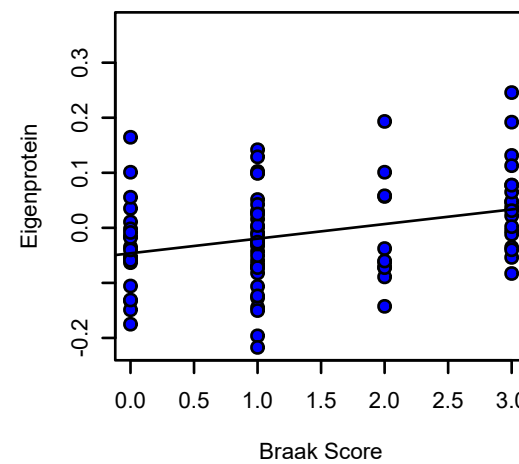

**bicor=0.24, p=0.015**  
**cor=0.25, p=0.012**

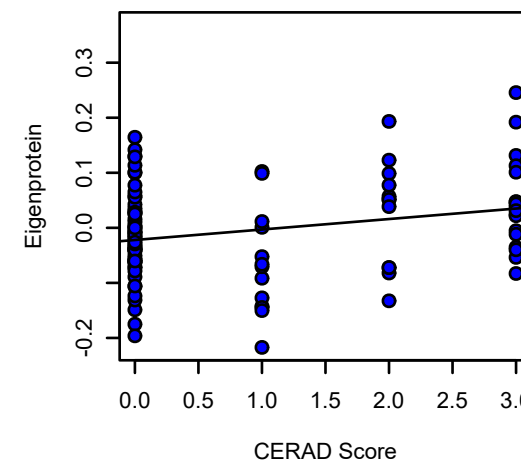

**M4 yellow.Consensus**

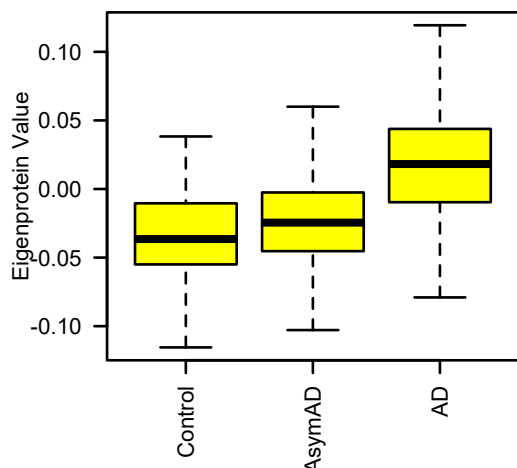

**M4 yellow.UPenn Mixed PRM (Synthetic Eigenprotein)**  
K-W ANOVA p: 6.7e-08

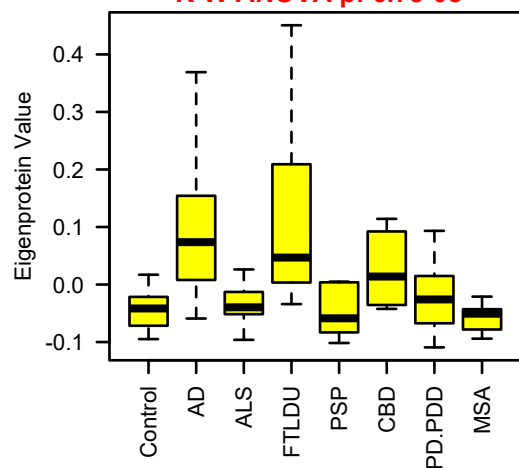

**M4 yellow.UPenn Mixed PRM (Synthetic Eigenprotein)**  
K-W ANOVA p: 1.3e-05

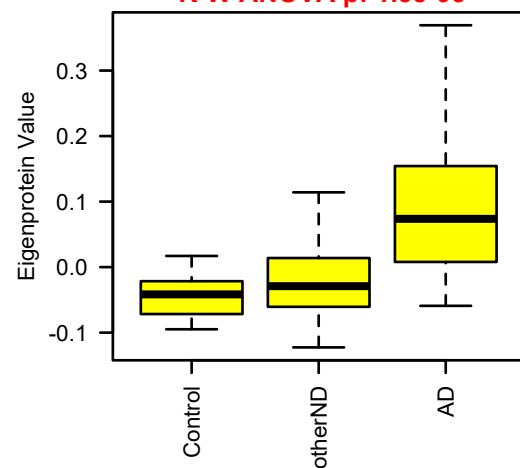

**bicor=0.46, p=1e-05**  
**cor=0.41, p=0.00011**

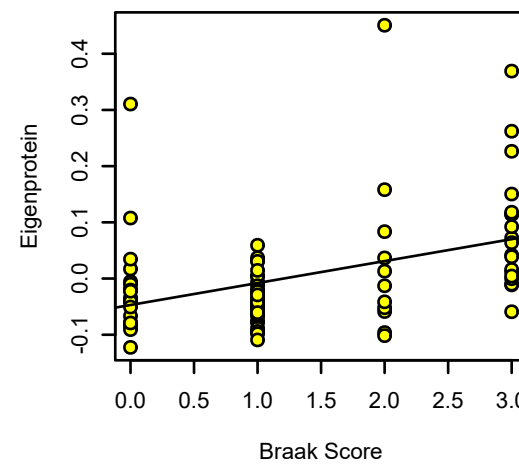

**bicor=0.36, p=2e-04**  
**cor=0.35, p=0.00036**

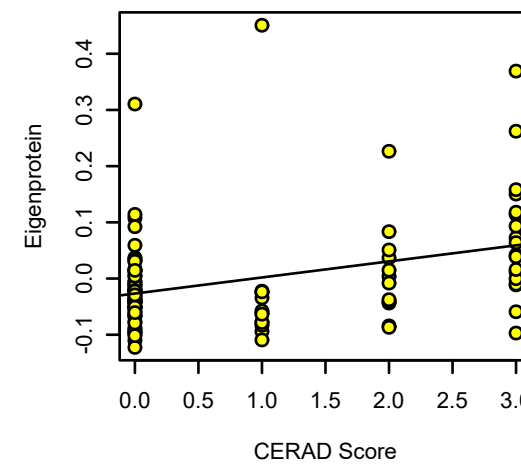

**M11 greenyellow.Consensus**

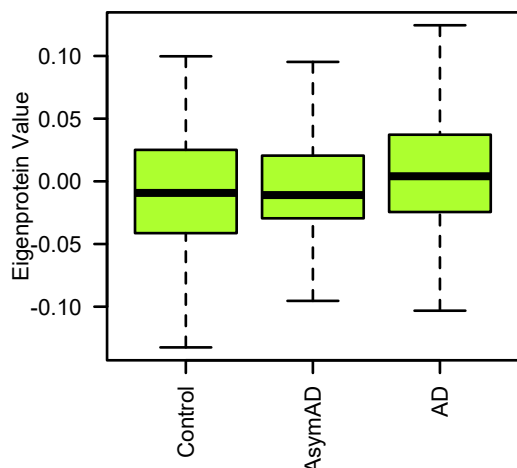

**M11 greenyellow.UPenn Mixed PRM (Synthetic Eigenprotein)**  
K-W ANOVA p: 0.29

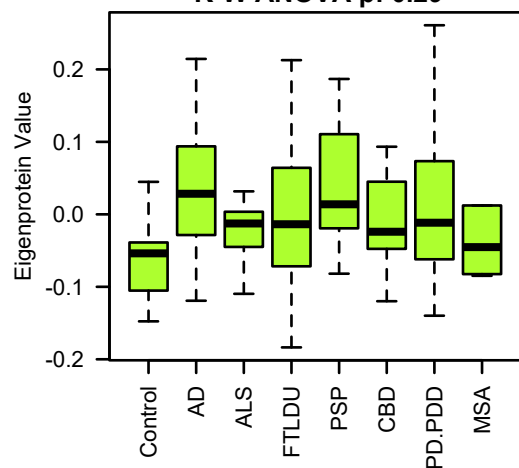

**M11 greenyellow.UPenn Mixed PRM (Synthetic Eigenprotein)**  
K-W ANOVA p: 0.029

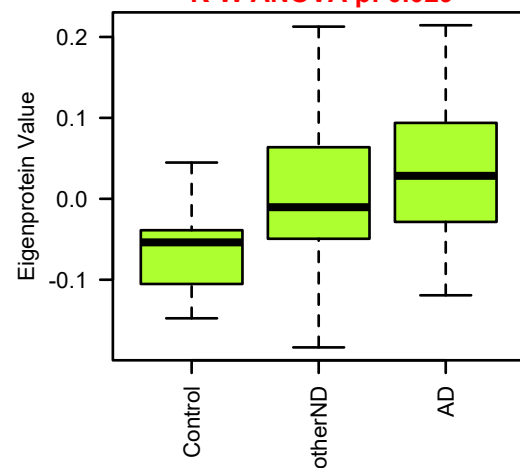

**bicor=0.27, p=0.012**  
**cor=0.25, p=0.022**

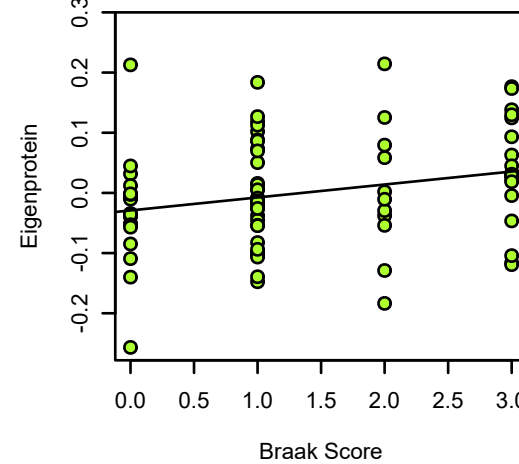

**bicor=0.0052, p=0.96**  
**cor=-0.012, p=0.91**

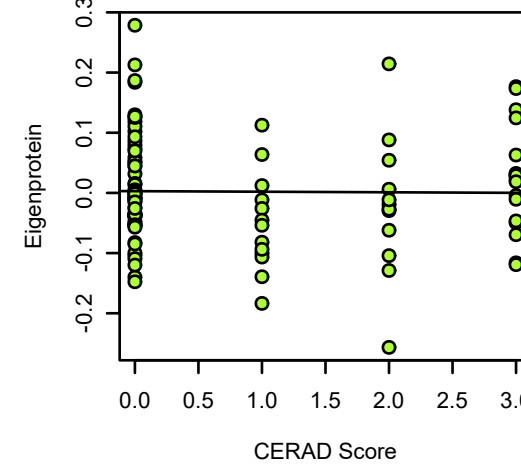

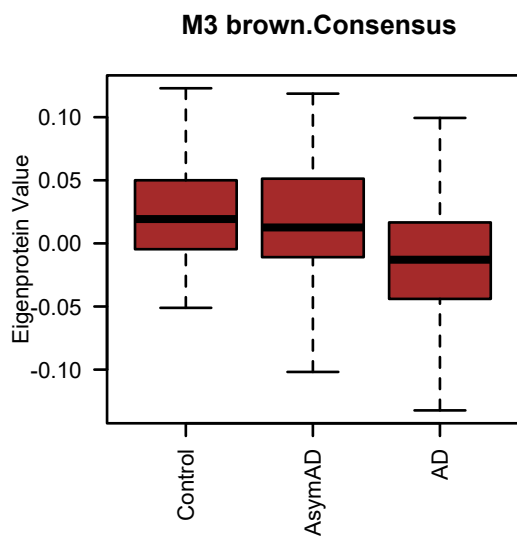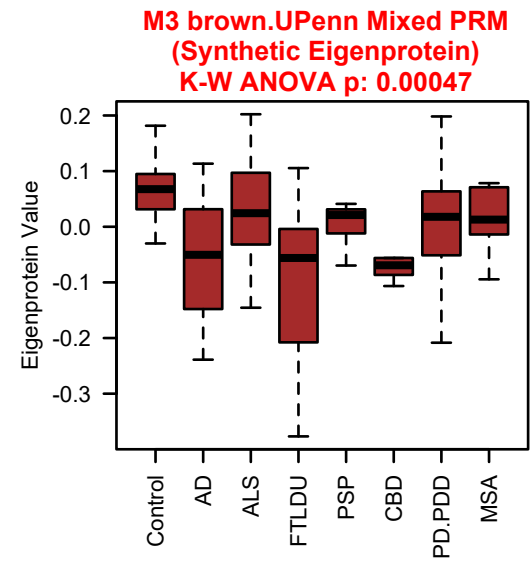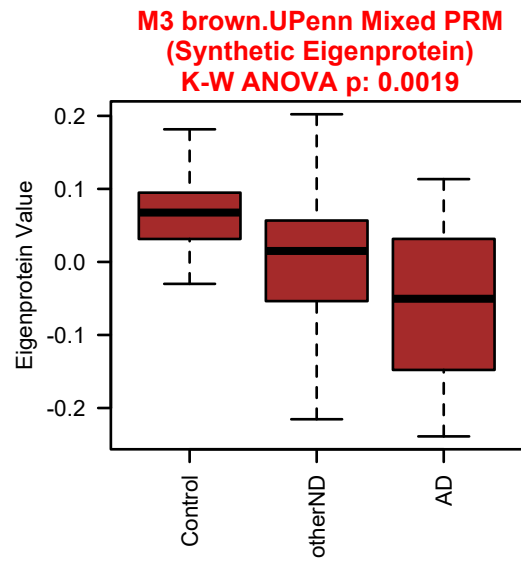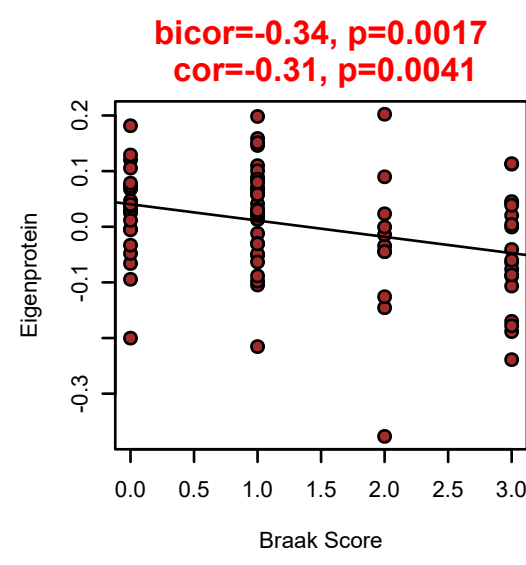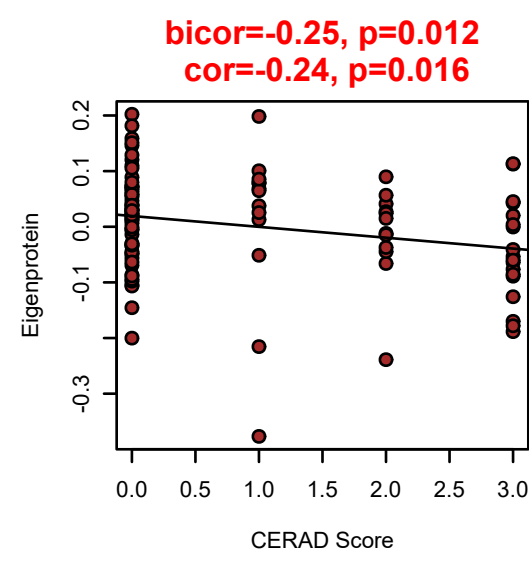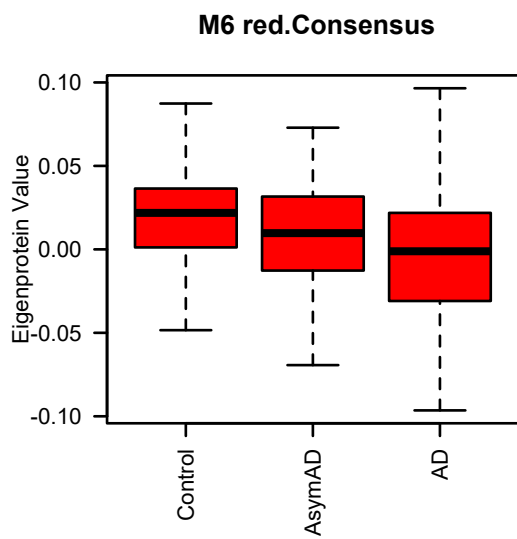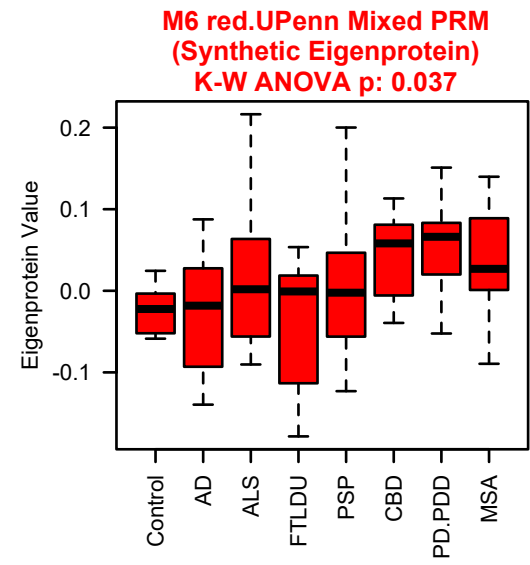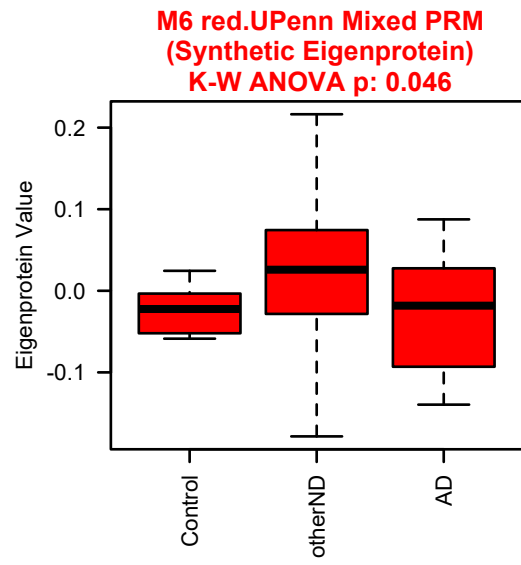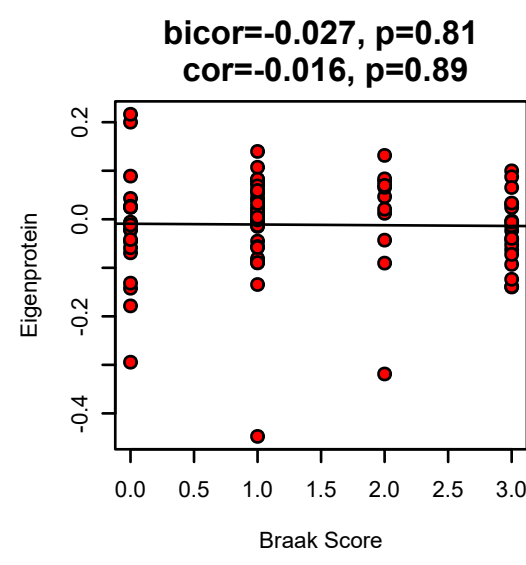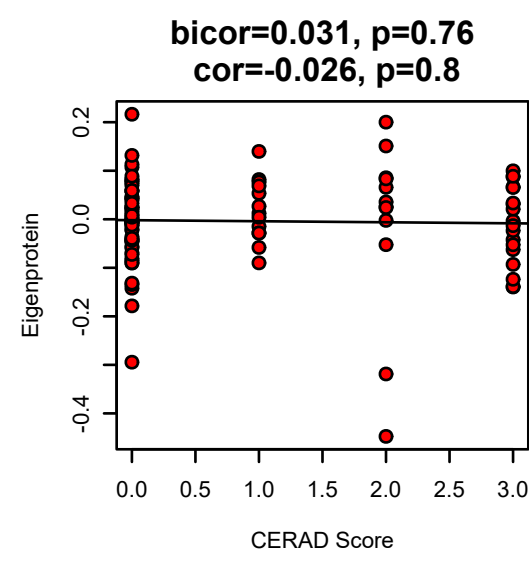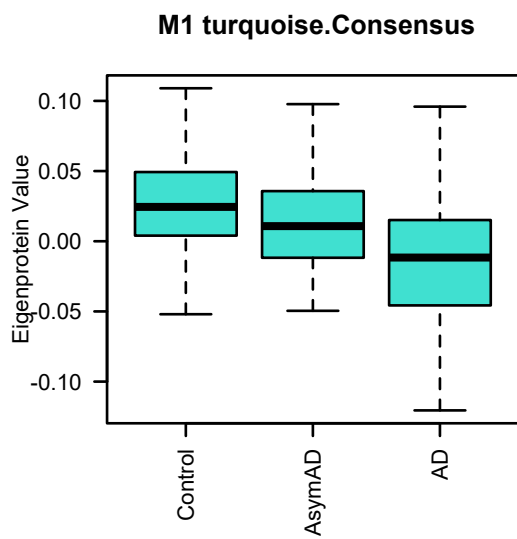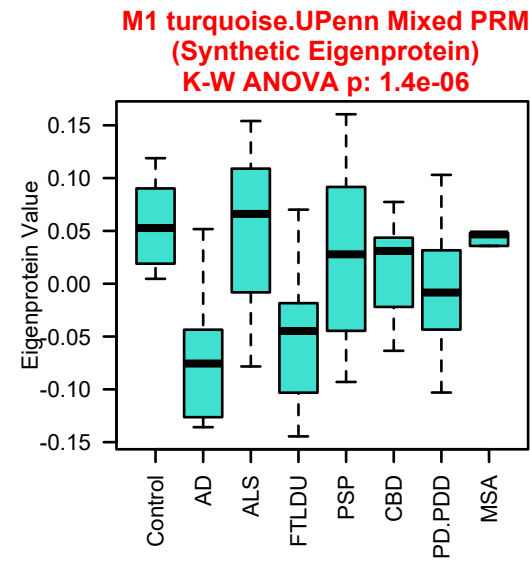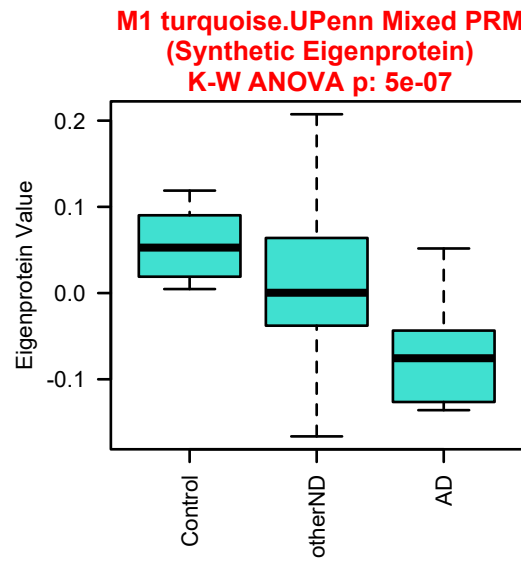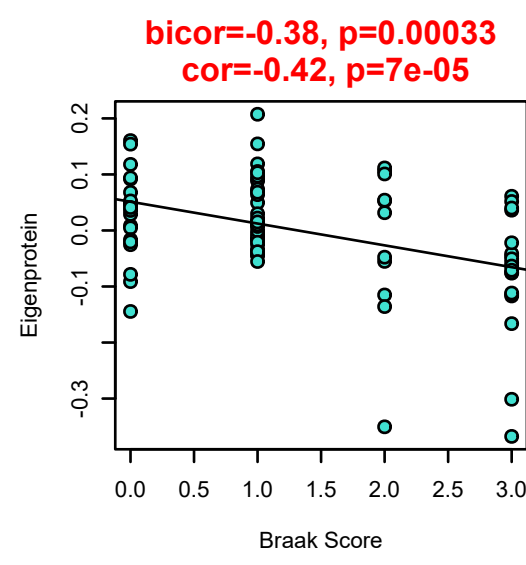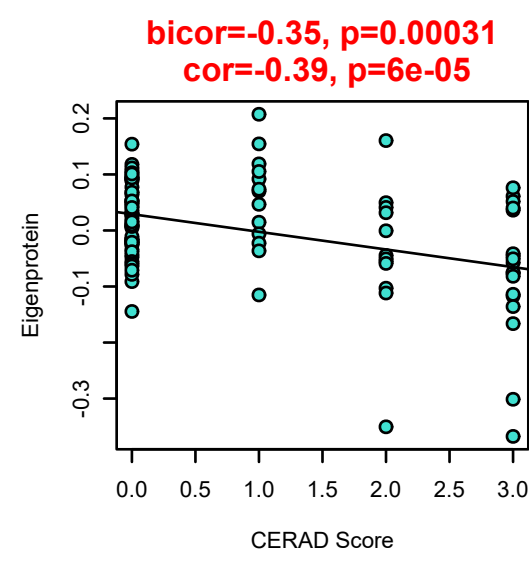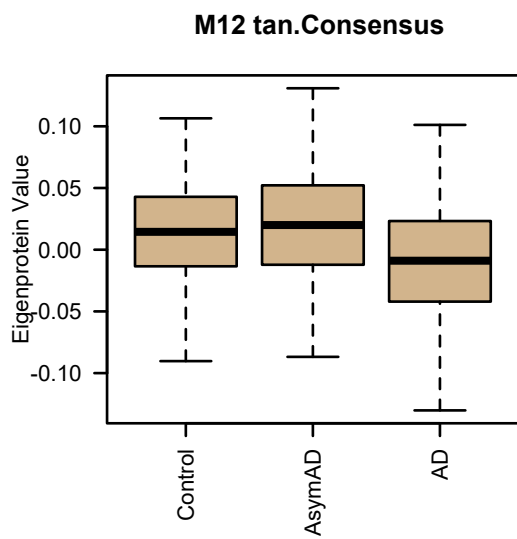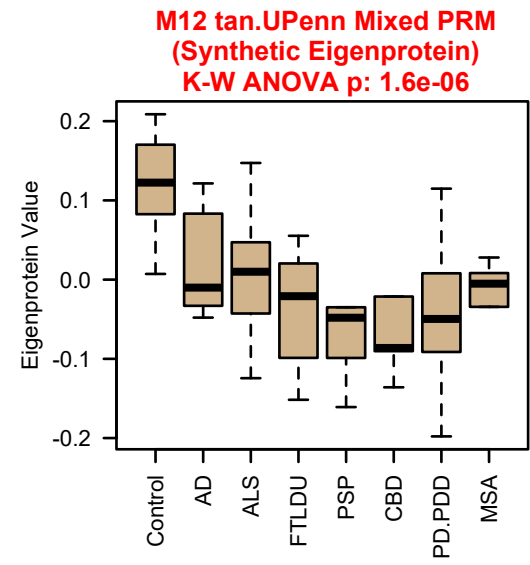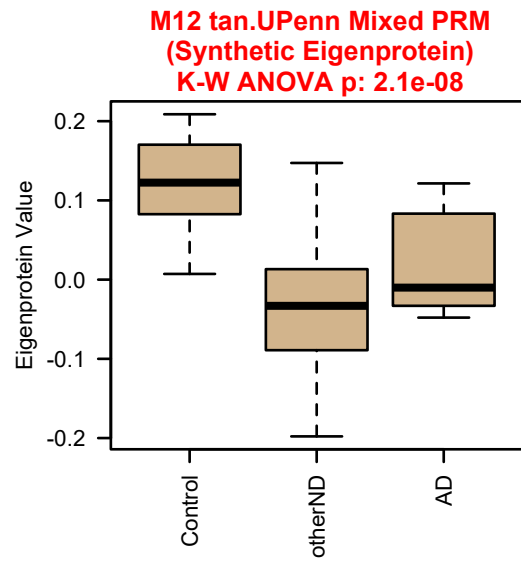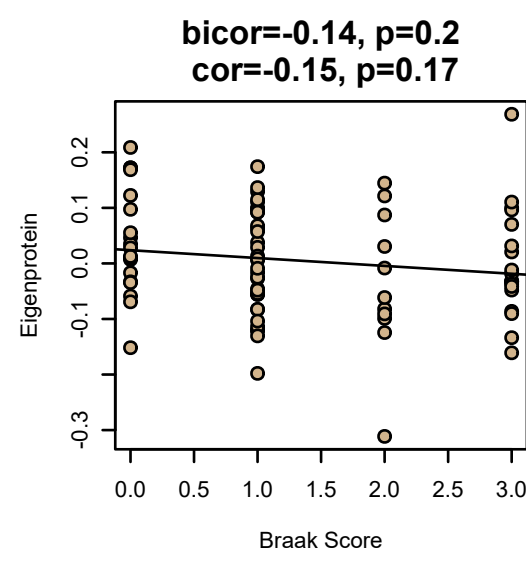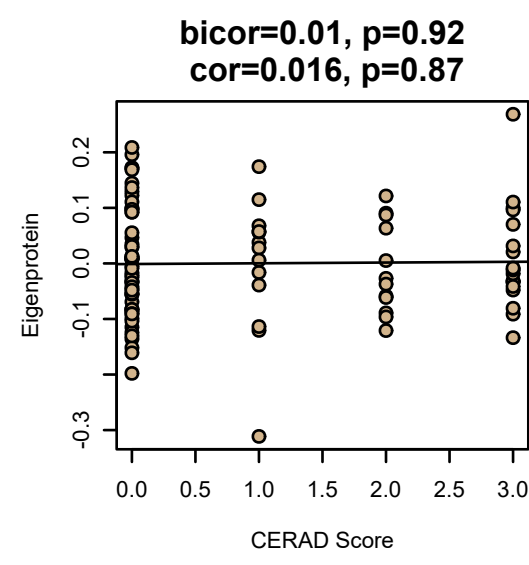



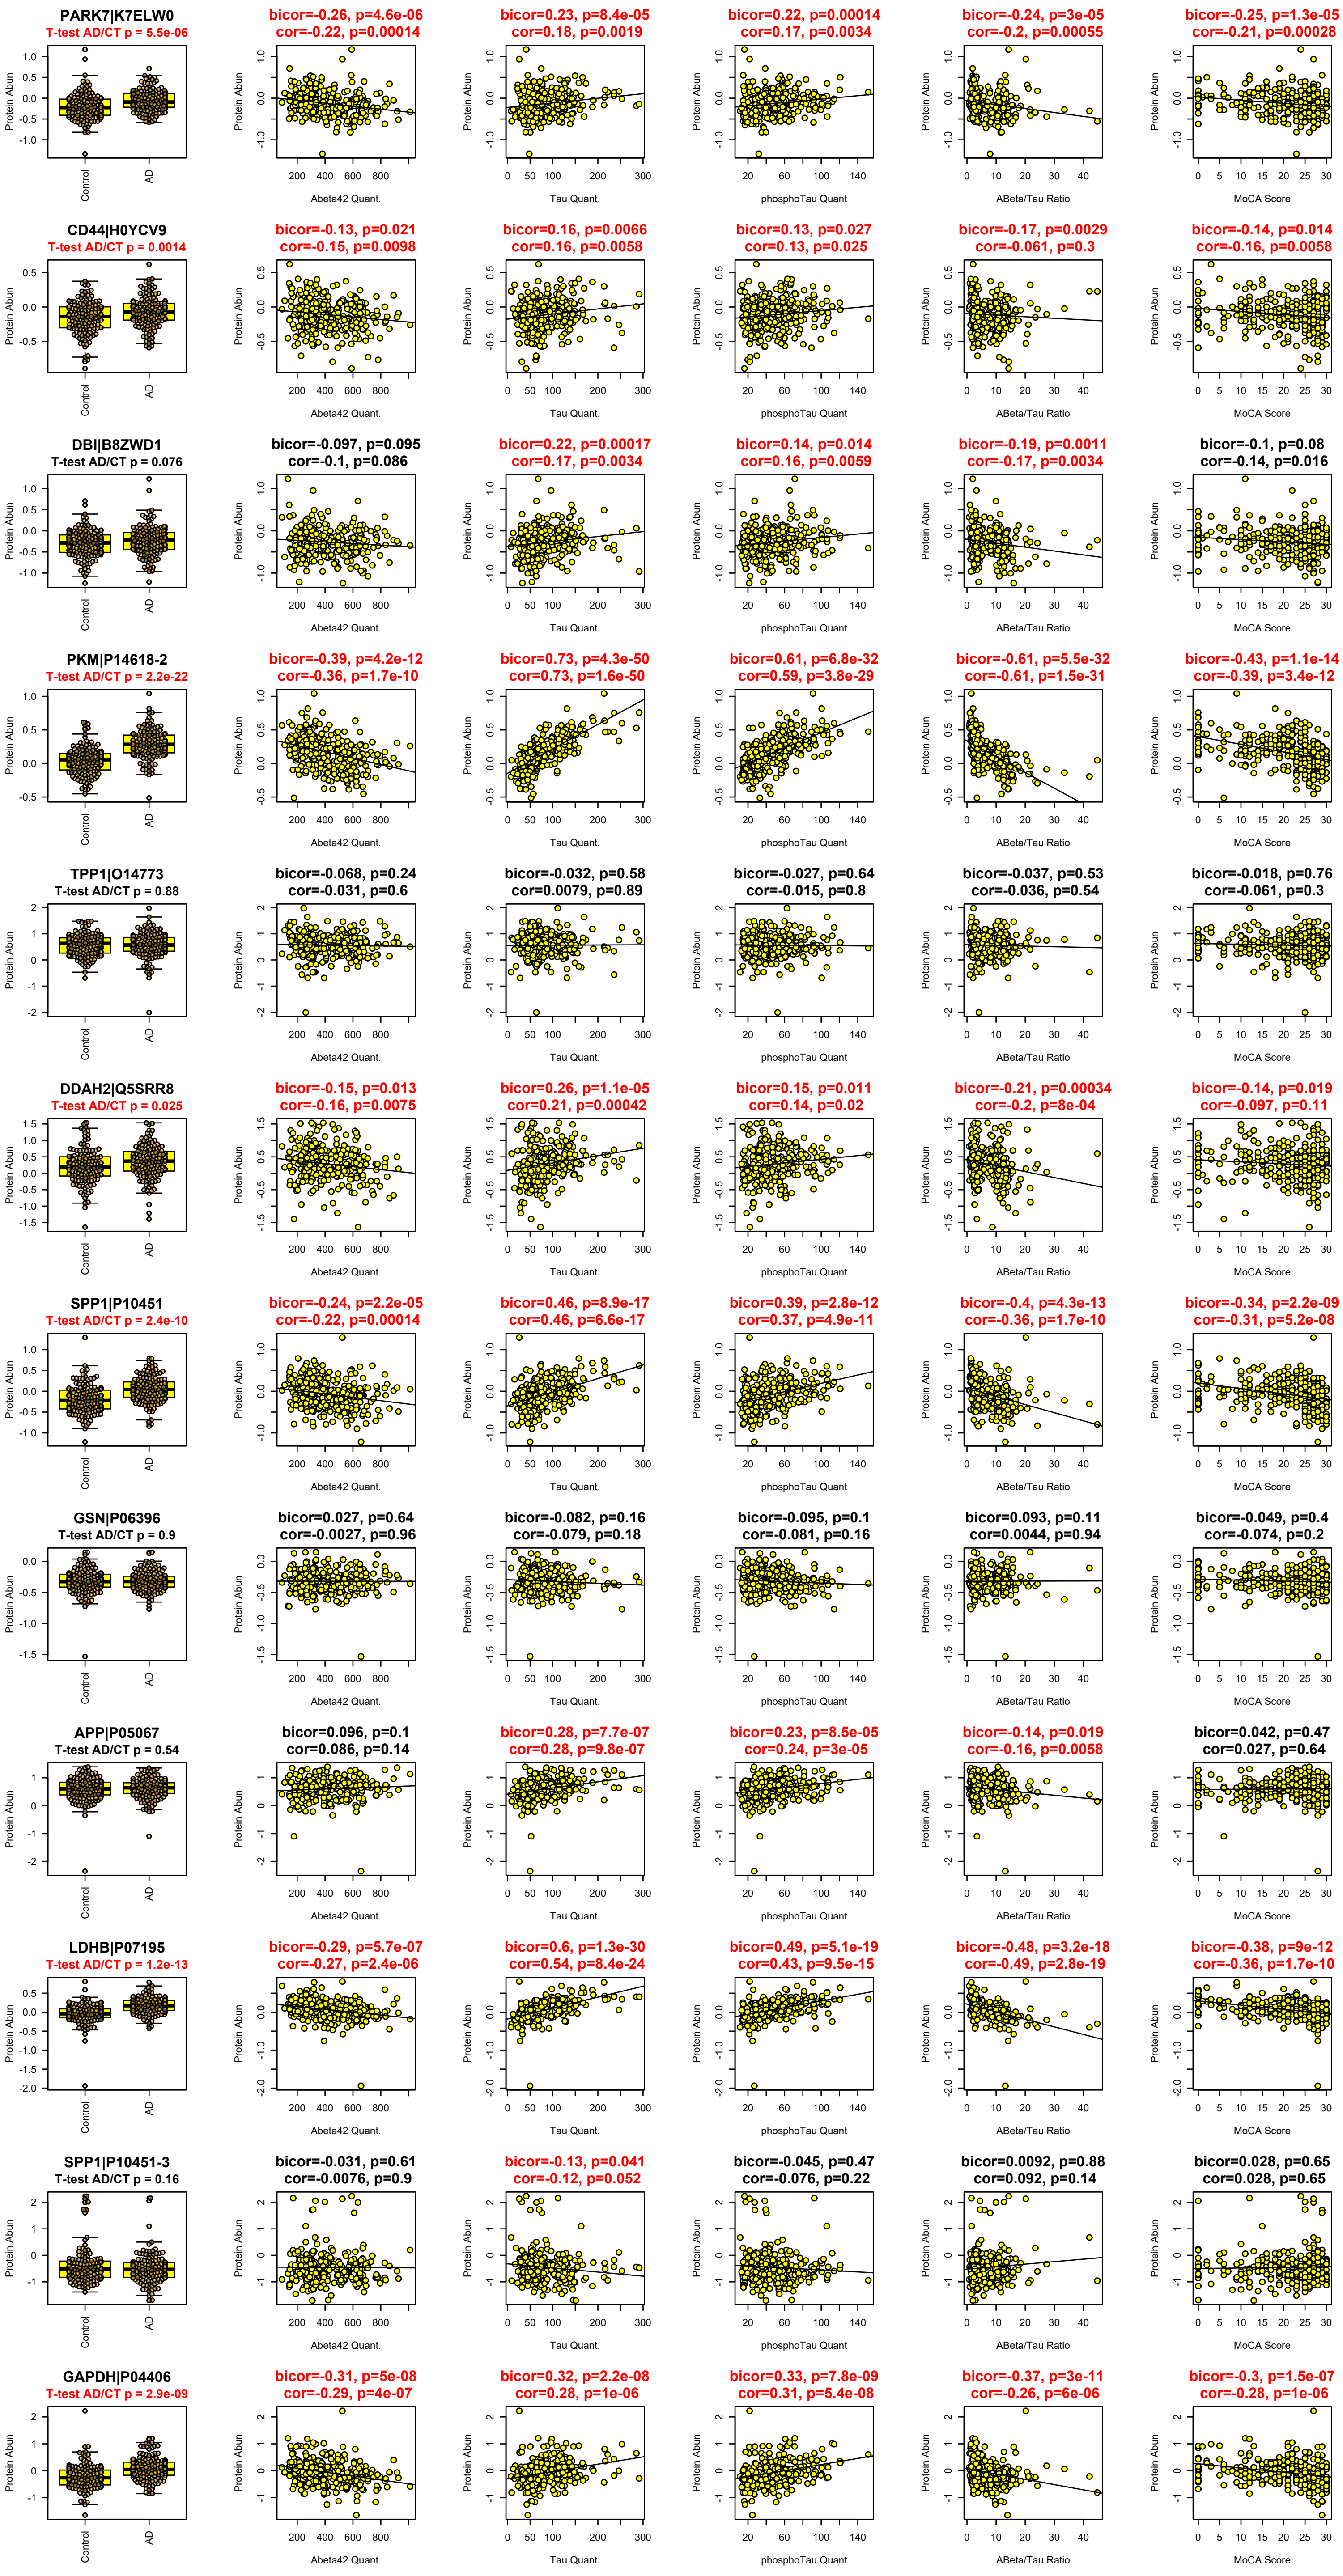



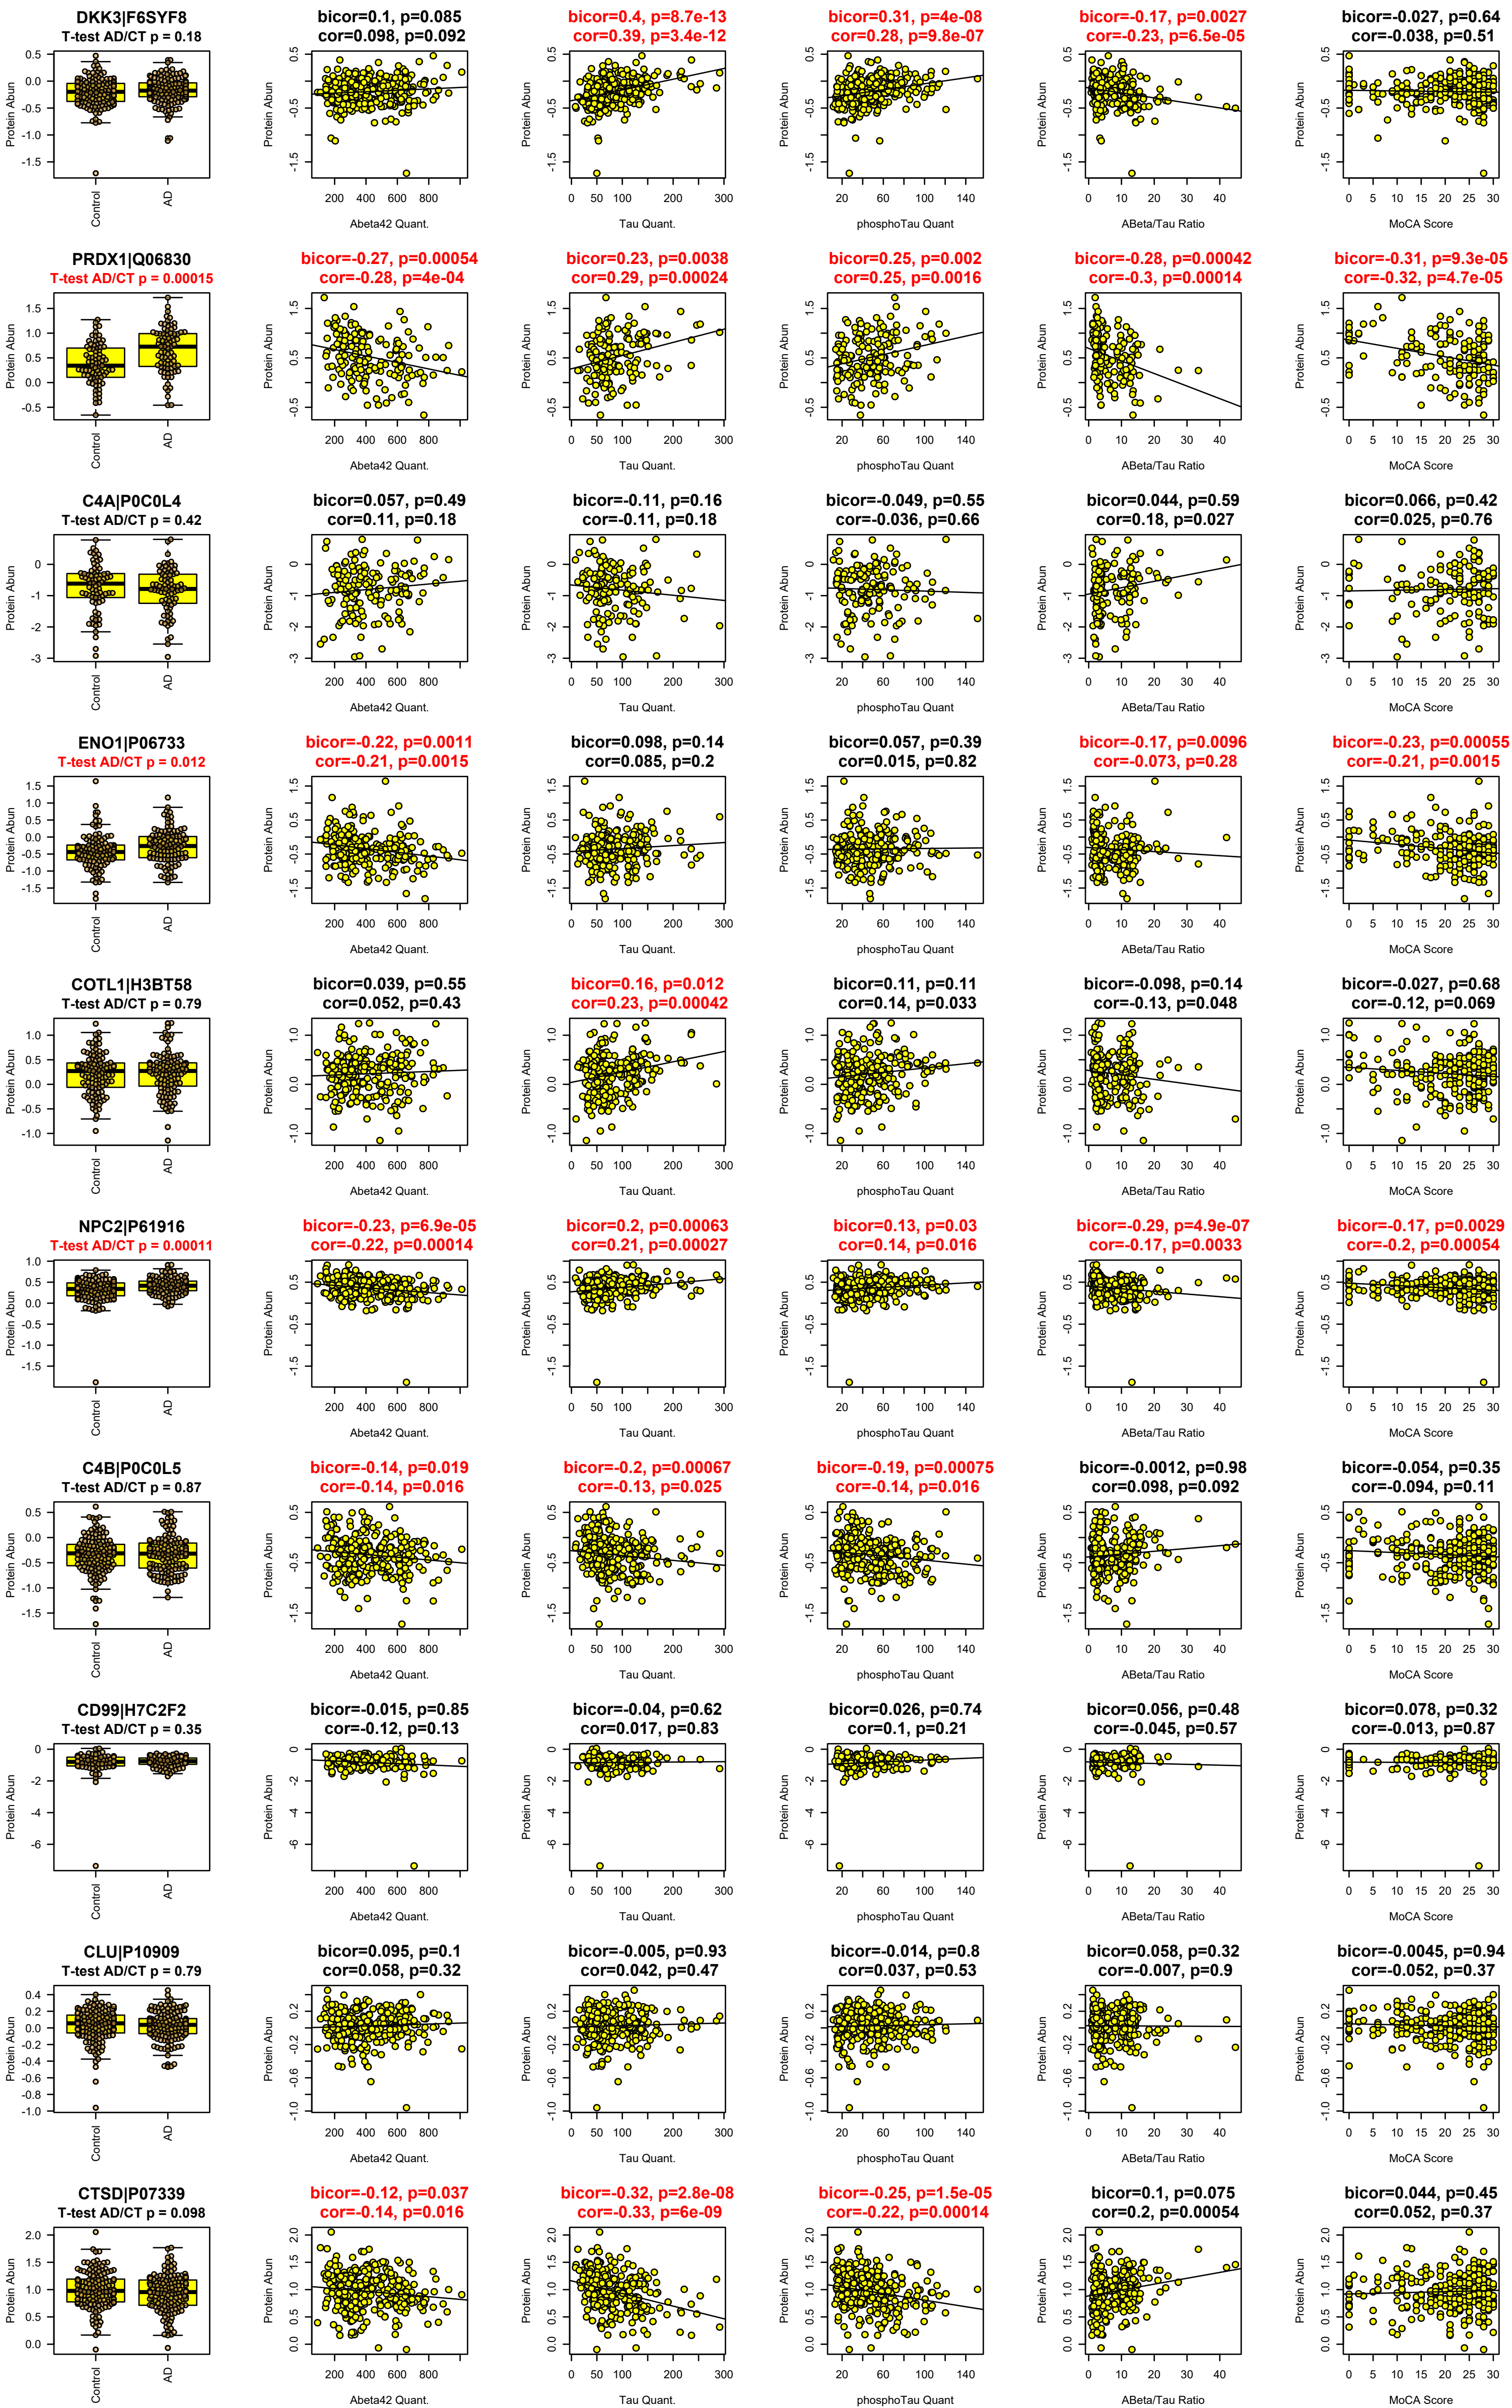



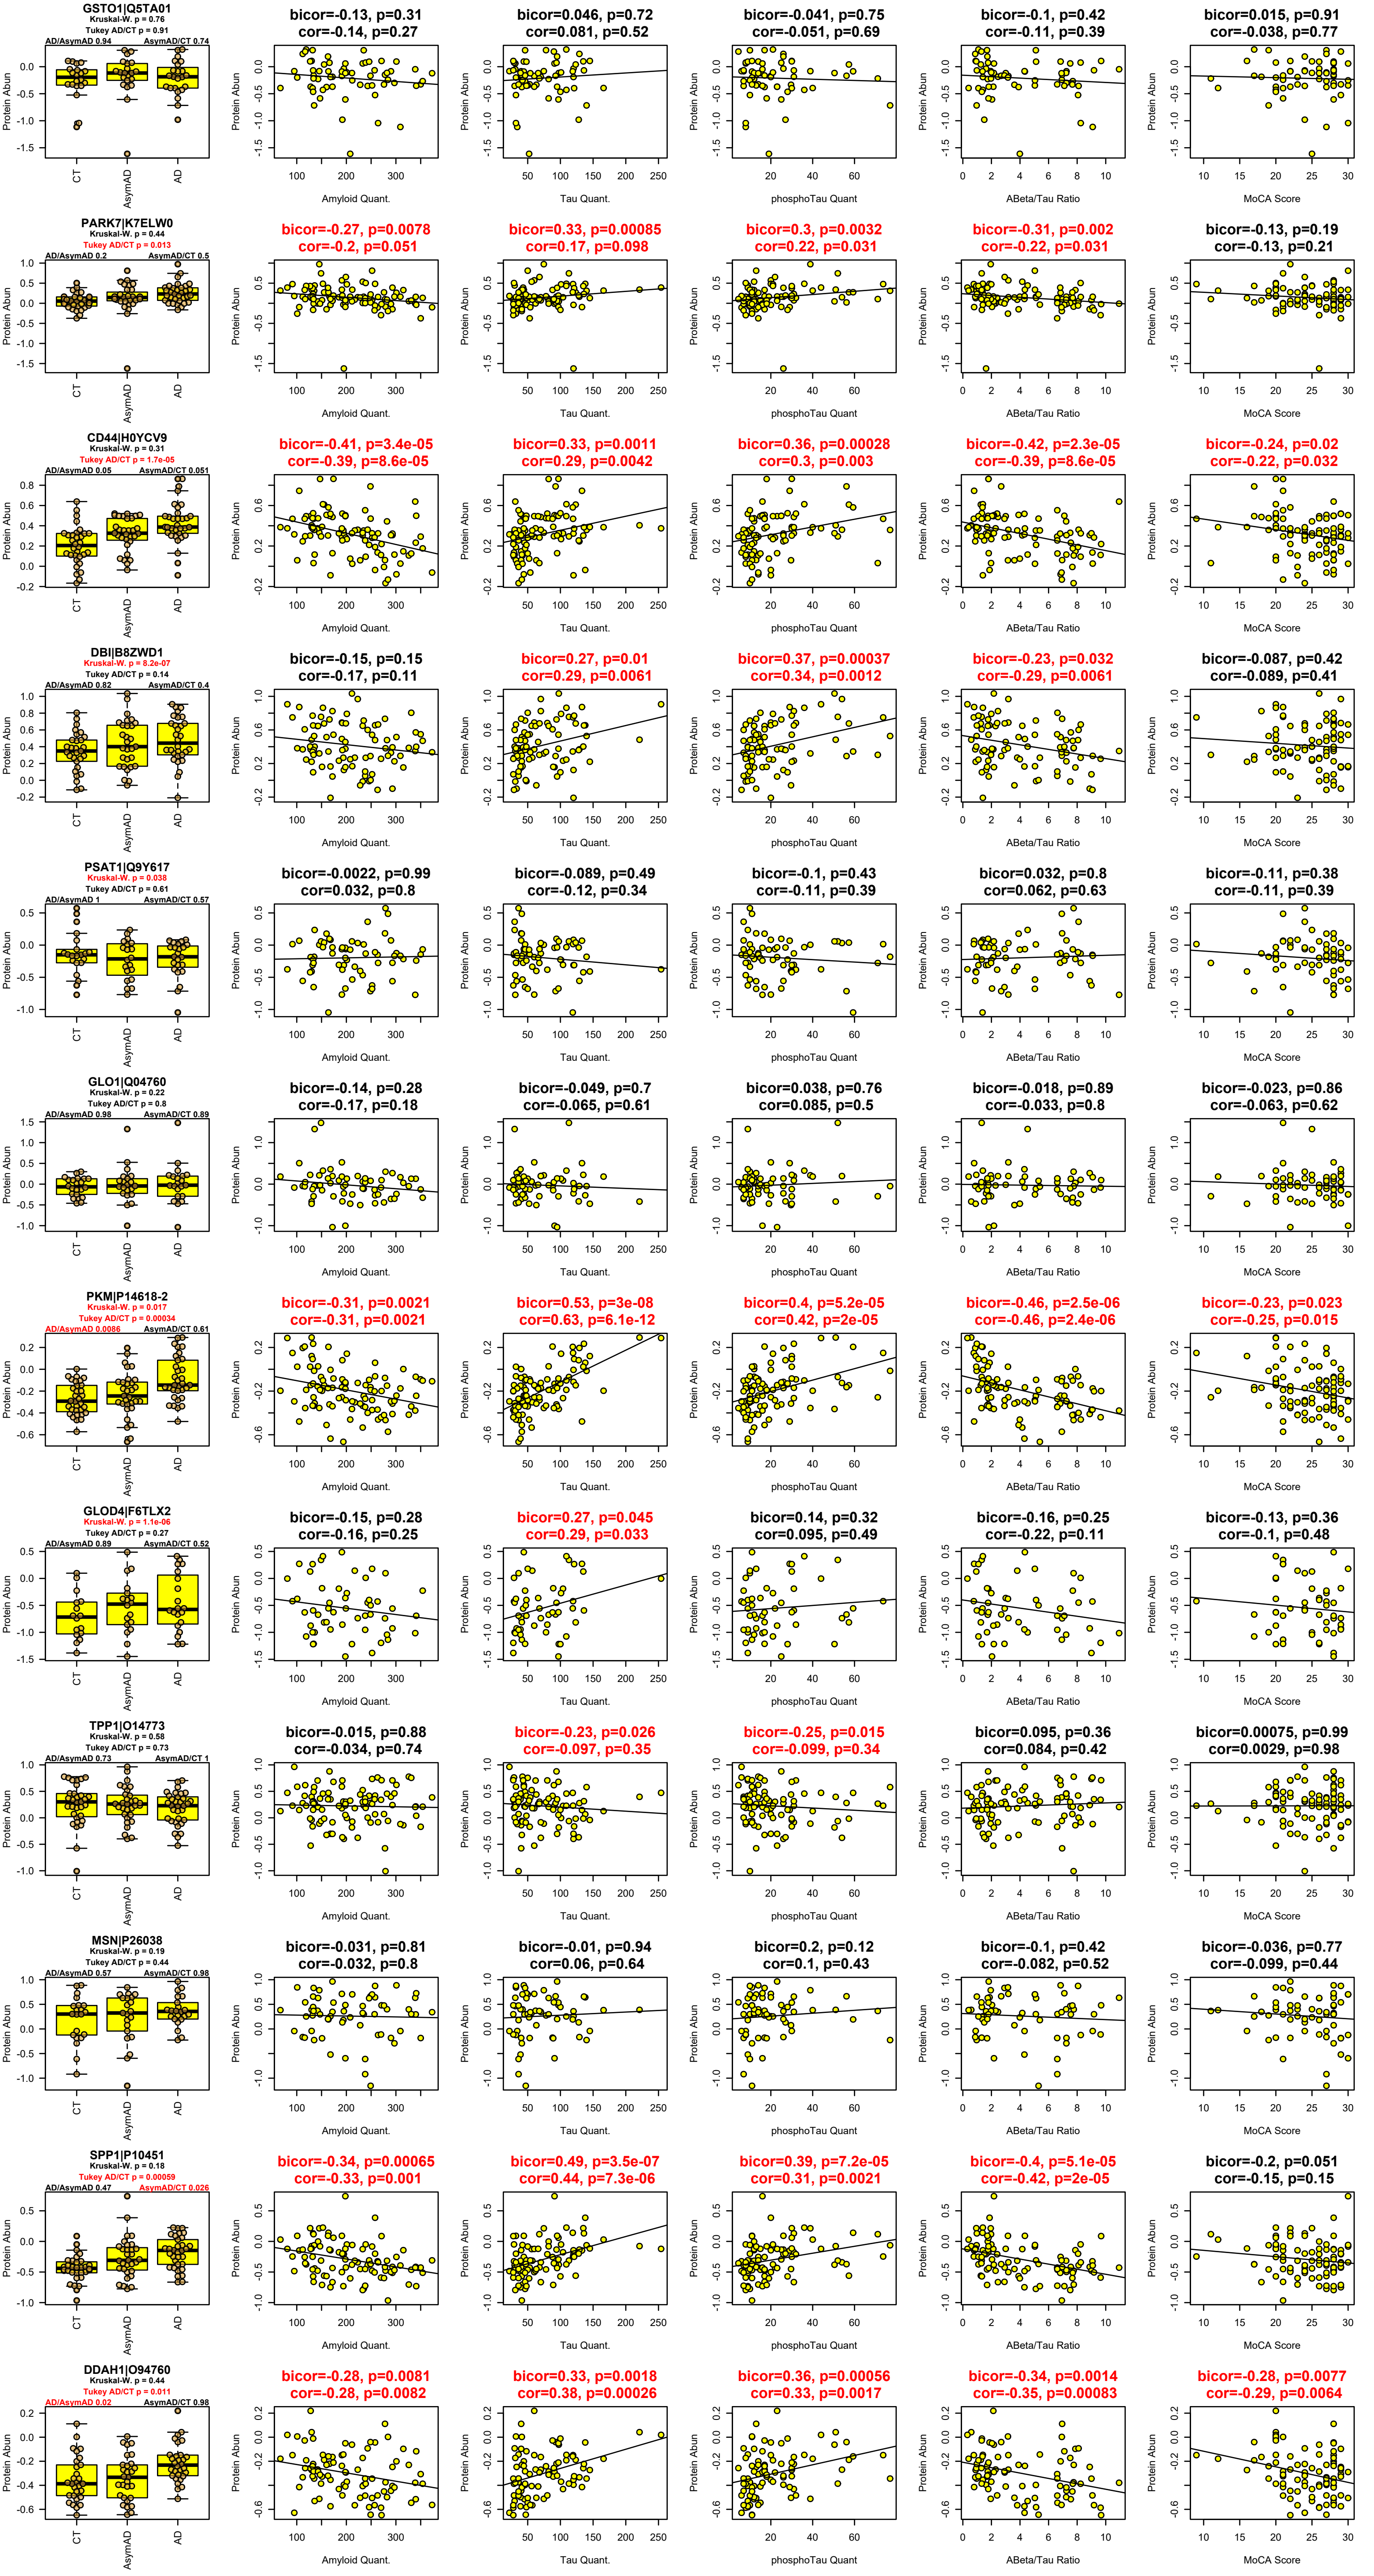



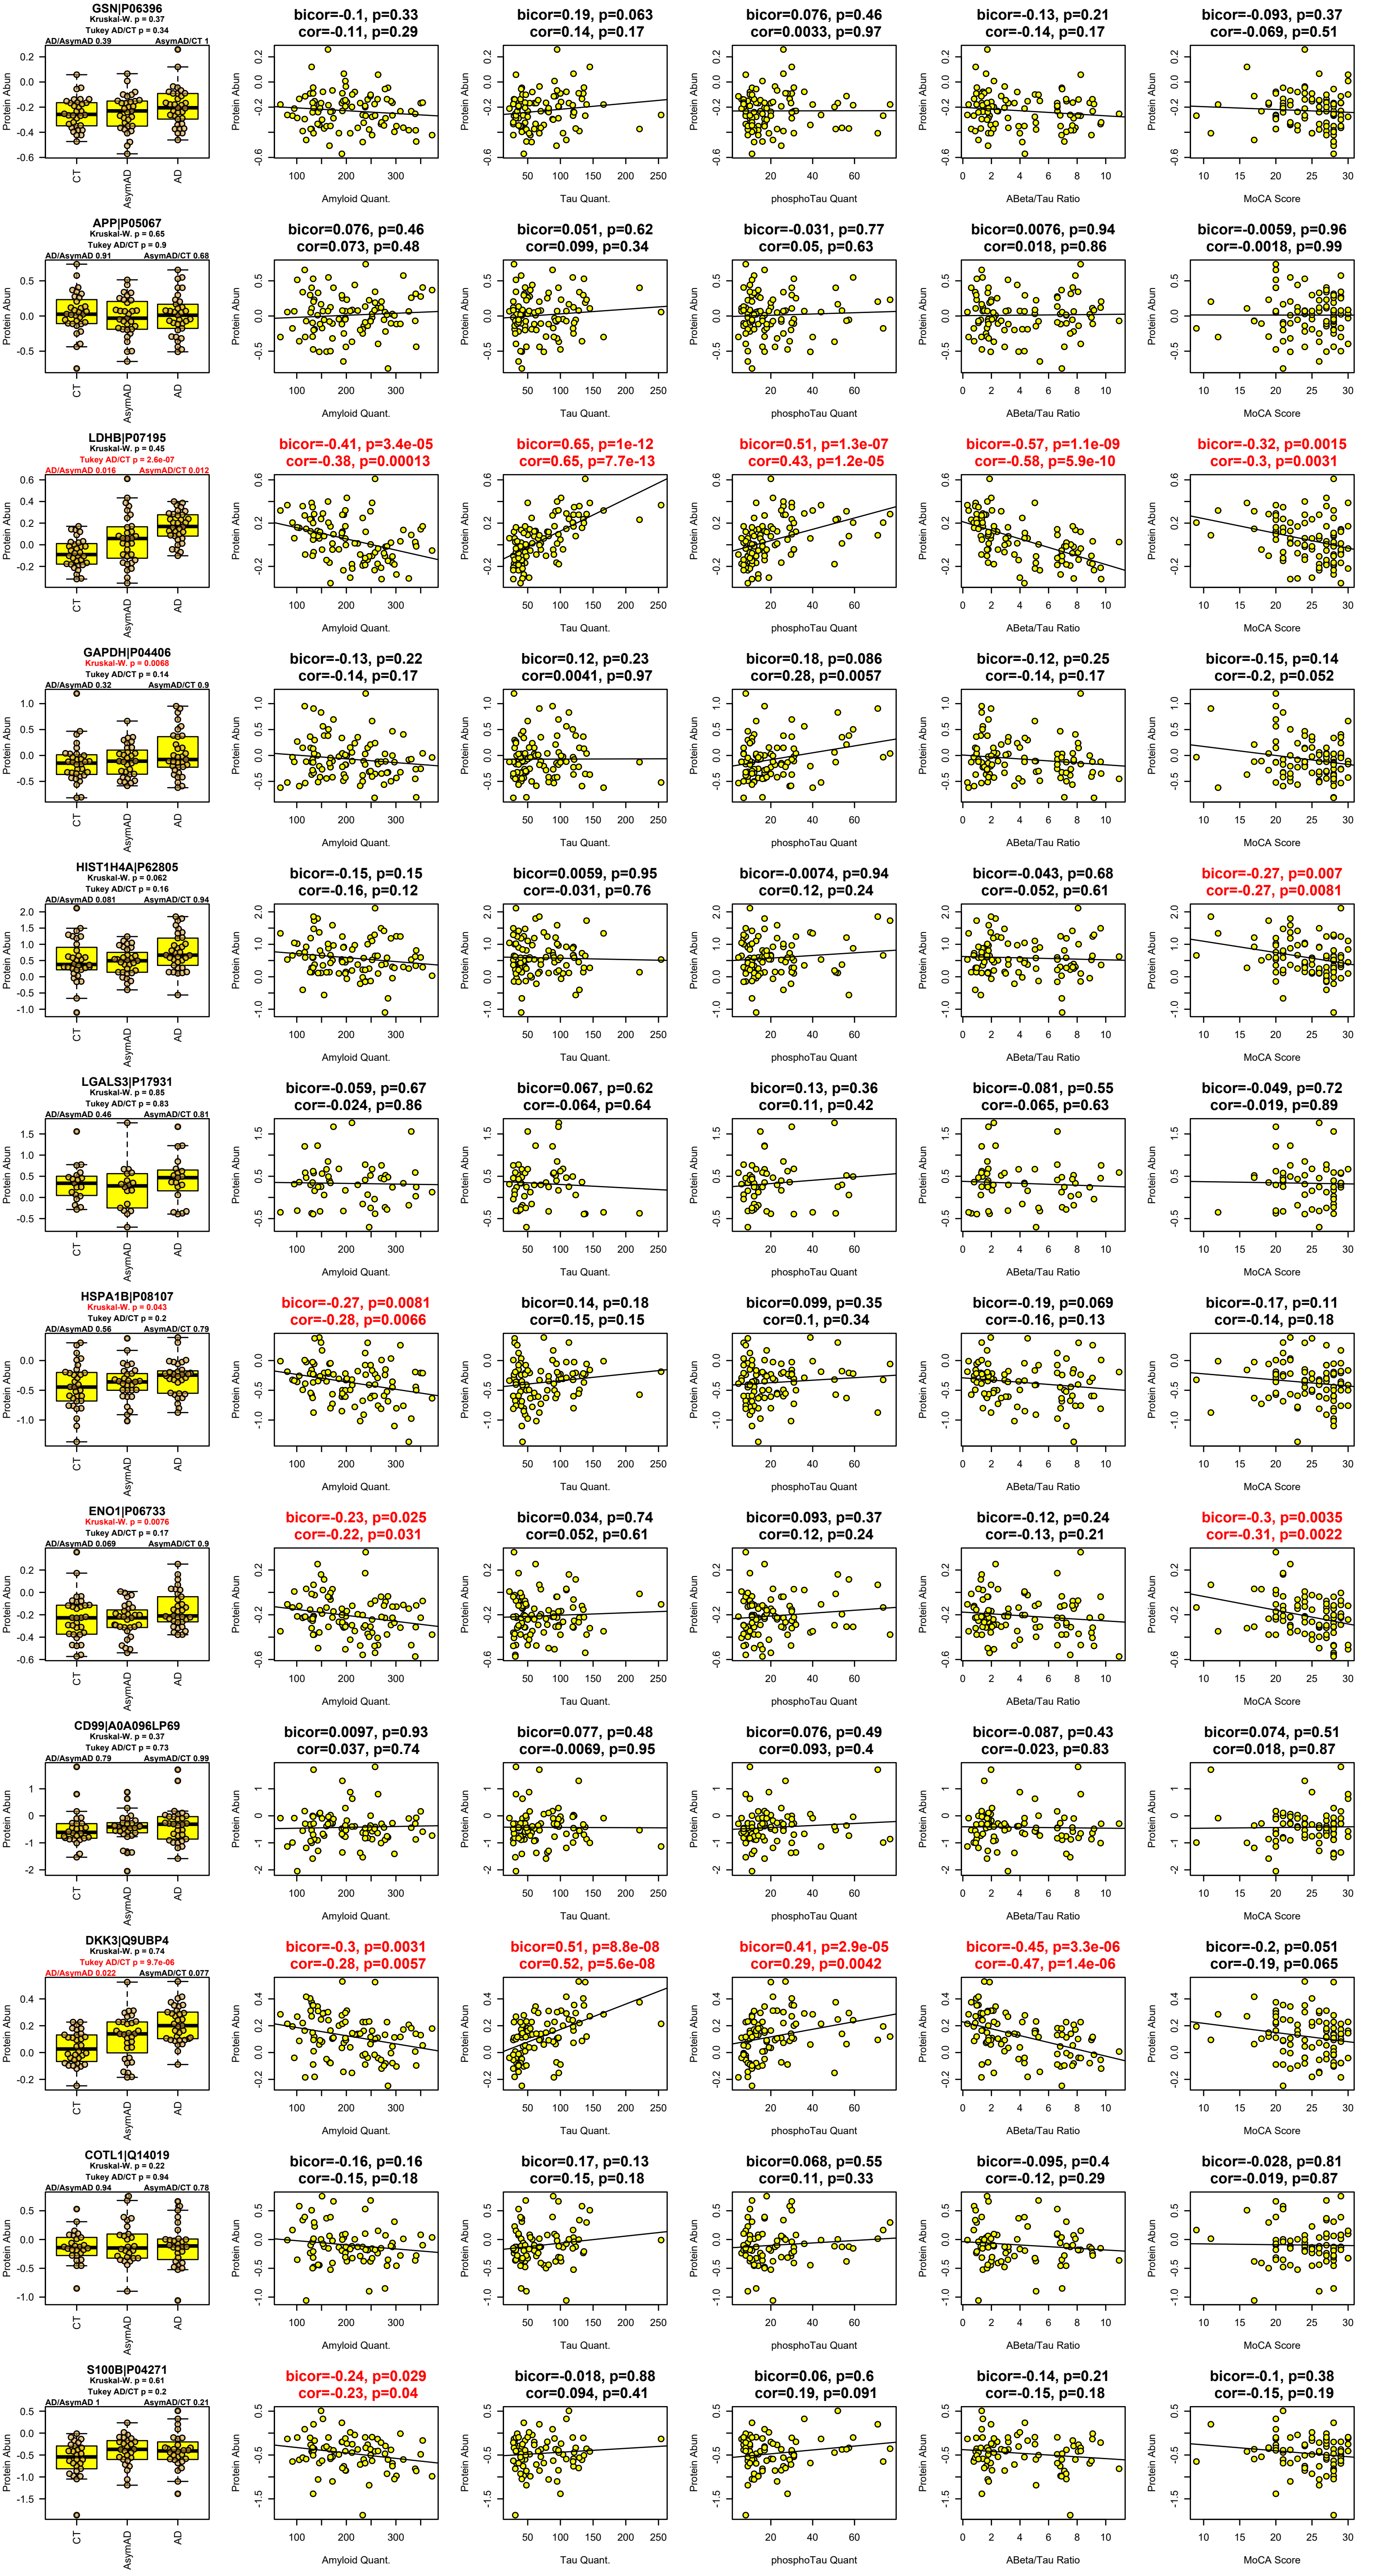



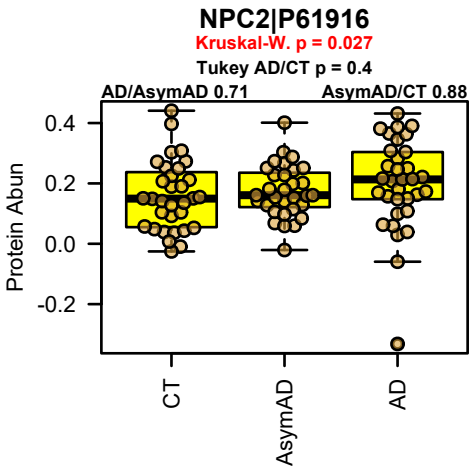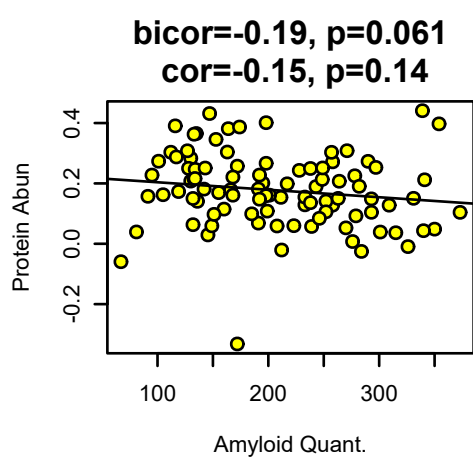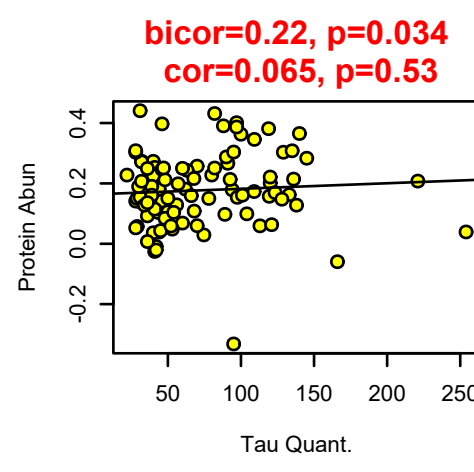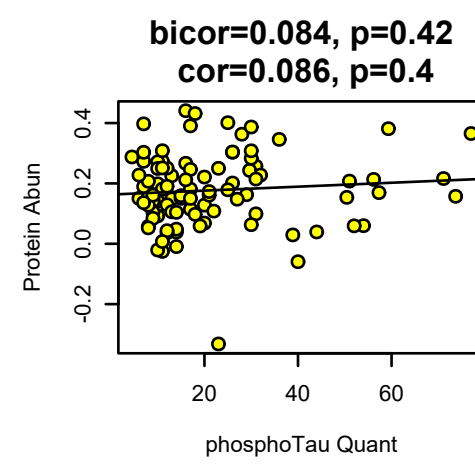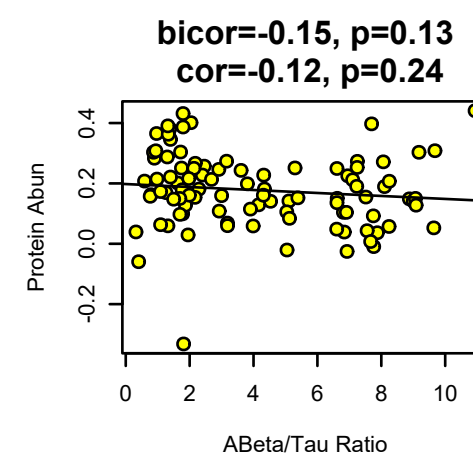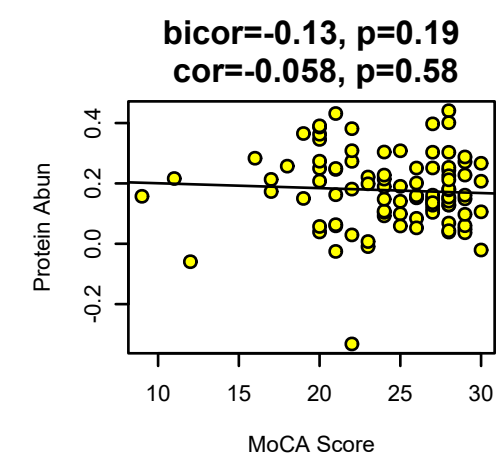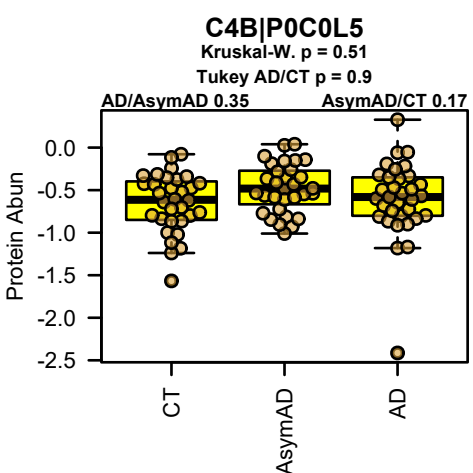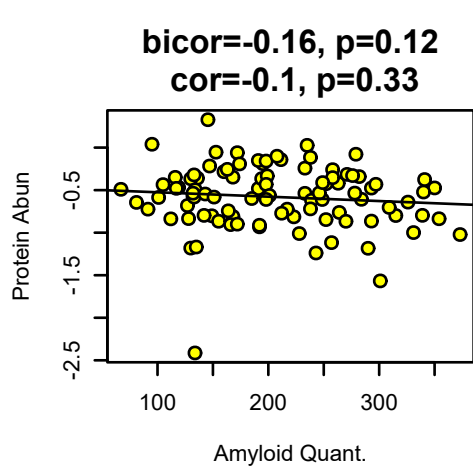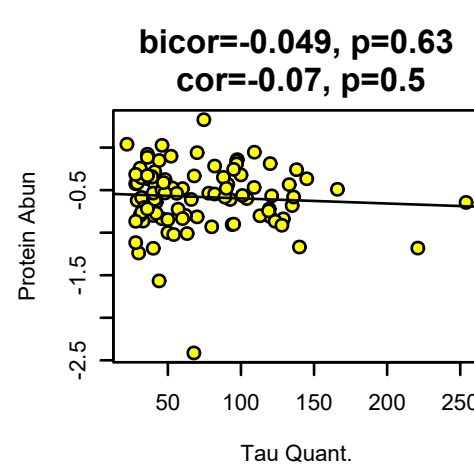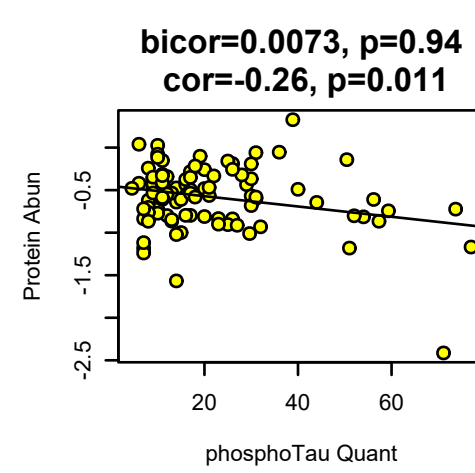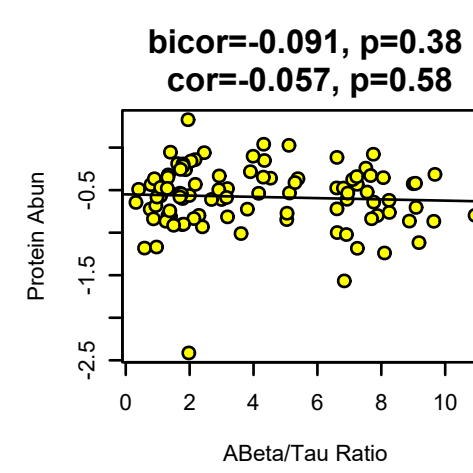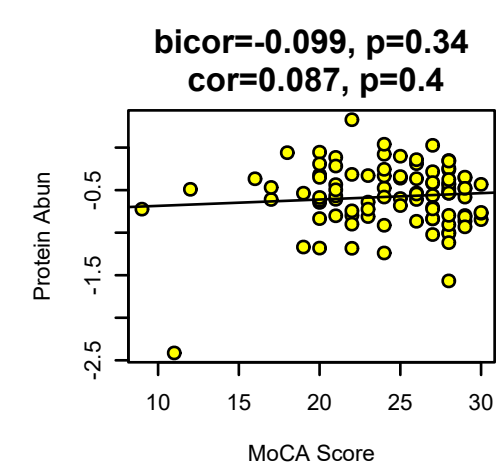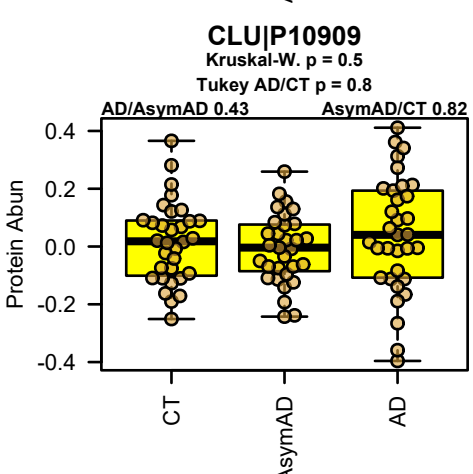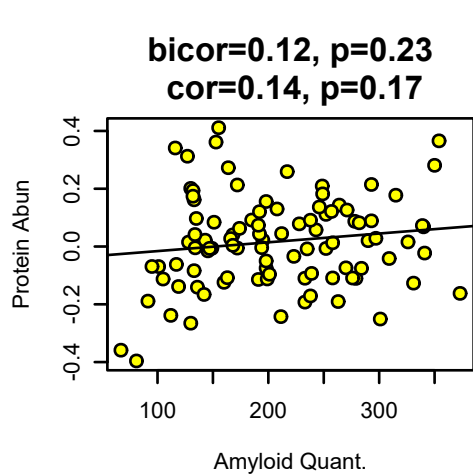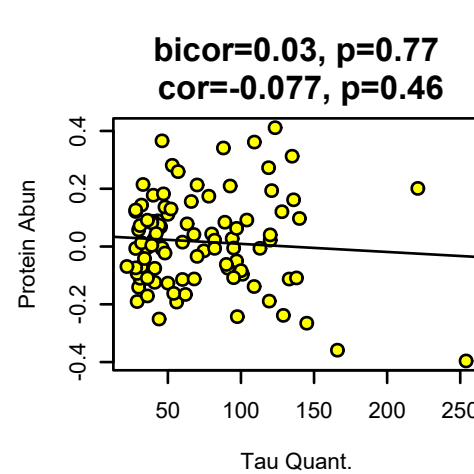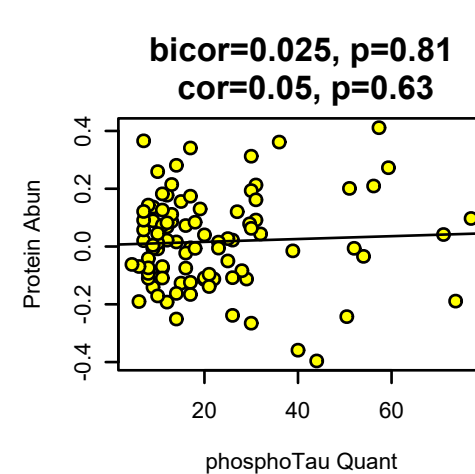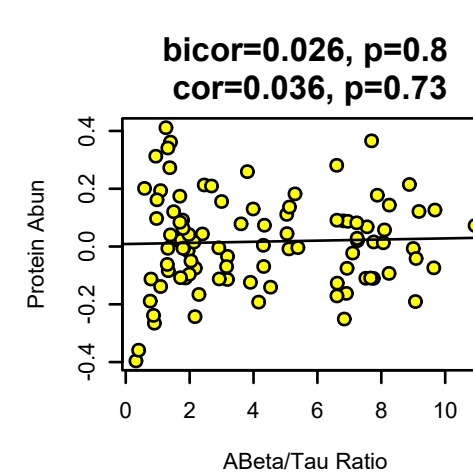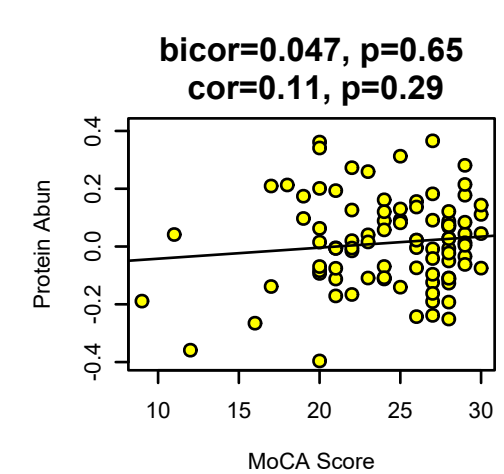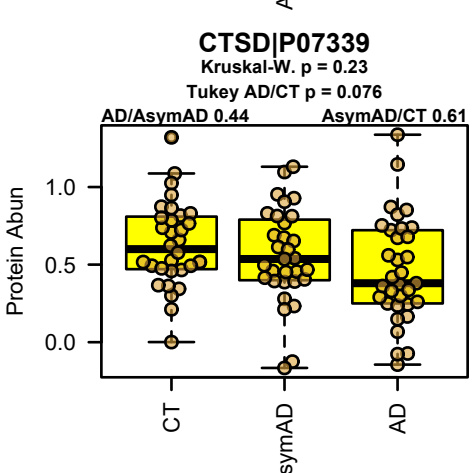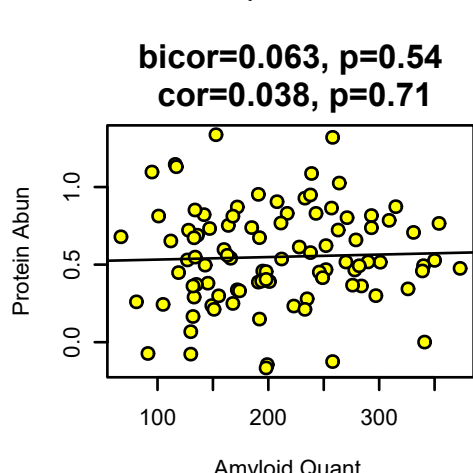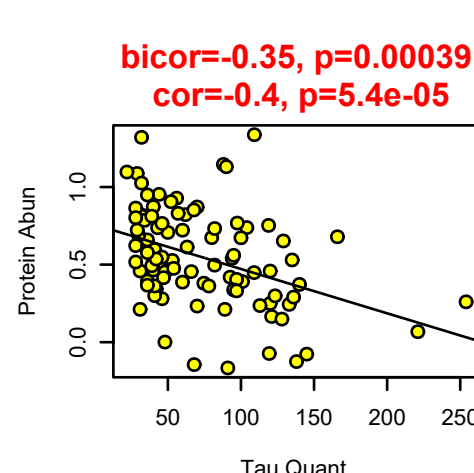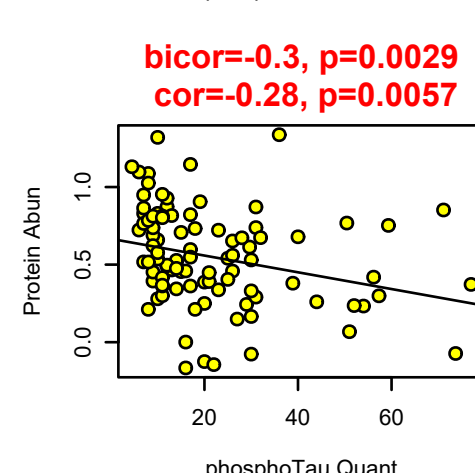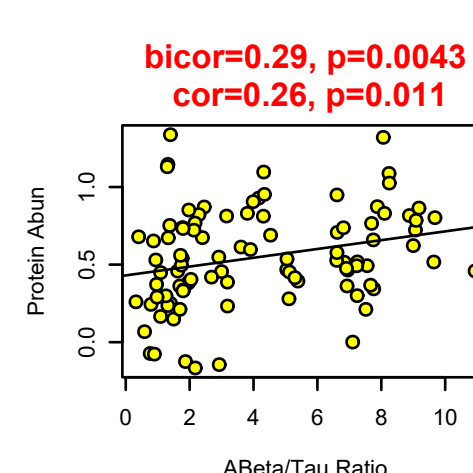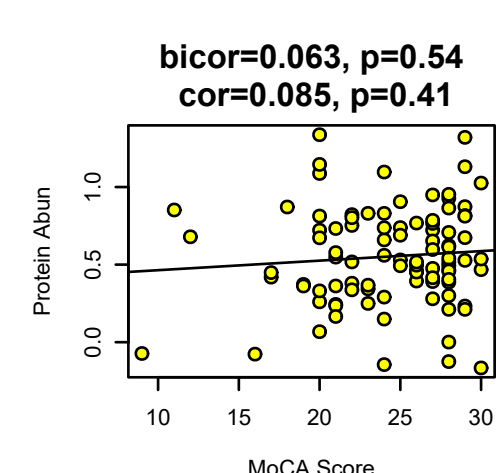

Supplement: Supplementary file [file media-7.pdf]
